# Supplementary material for: Pupylation-based proximity labelling reveals regulatory factors in cellulose biosynthesis in Arabidopsis
Source: Research Square preprint supplement (doi:10.21203/rs.3.rs-3849556/v1), 2024-09-30
Supplement: Supplementary file 1 [file 6dd7f53d112b4f844888dc47.xlsx]

## Sheet: AtRACK1a and GFP LFQ
Log2 transformed LFQ of proteins detected in samples from AtRACK1a-PafA or GFP-PafA
GFP_rep1	GFP_rep2	GFP_rep3	AtRACK_rep1	AtRACK_rep2	AtRACK_rep3	C: Only identified by site	C: Reverse	C: Potential contaminant	C: Taxonomy IDs	N: Peptides	N: Razor + unique peptides	N: Unique peptides	N: Sequence coverage [%]	N: Unique + razor sequence coverage [%]	N: Unique sequence coverage [%]	N: Mol. weight [kDa]	N: Q-value	N: Score	N: Intensity	N: iBAQ peptides	N: MS/MS count	T: Protein IDs	T: Majority protein IDs	T: id
NaN	NaN	NaN	22.6136	22.6715	22.6453				-1	26	26	26	52.9	52.9	52.9	35.747	0	323.31	212450000	20	497	atRACK	atRACK	0
24.7321	25.062	25.0169	24.5849	24.3016	24.4201				-1	5	5	5	27.8	27.8	27.8	7.8251	0	186.7	582860000	1	241	FLAGPUP|SUB|SUB_LABEL	FLAGPUP|SUB|SUB_LABEL	8
NaN	NaN	NaN	18.4205	18.3511	18.4847				-1	3	3	3	9.1	9.1	9.1	52.685	0	65.401	4103200	20	19	NbE05064168.1;NbD000166.1;NbE05064169.1	NbE05064168.1;NbD000166.1	14
17.5266	17.5863	17.6357	NaN	NaN	17.0912				-1	3	3	2	10.4	10.4	10.4	17.38	0	40.041	2090000	7	17	NbD000183.1;NbD009419.1;NbE05065992.1;NbD041320.1;NbE03060989.1;NbD053073.1;NbD049334.1;NbD026872.1;NbD017283.1;NbD017092.1;NbD013027.1;NbD009418.1;NbD005470.1;NbD000403.1	NbD000183.1;NbD009419.1;NbE05065992.1;NbD041320.1;NbE03060989.1;NbD053073.1;NbD049334.1;NbD026872.1;NbD017283.1;NbD017092.1;NbD013027.1;NbD009418.1;NbD005470.1;NbD000403.1	16
NaN	NaN	NaN	15.0292	15.1065	15.1671				-1	2	2	2	2.5	2.5	2.5	181.97	0	14.836	339190	79	11	NbE03055315.1;NbD000535.1	NbE03055315.1;NbD000535.1	22
NaN	NaN	NaN	14.5464	14.6344	14.2489				-1	2	2	2	11.5	11.5	11.5	33.36	0	13.63	360810	18	13	NbD050608.1;NbE05064343.1;NbD007911.1;NbD020285.1;NbD000560.1	NbD050608.1;NbE05064343.1;NbD007911.1;NbD020285.1;NbD000560.1	23
NaN	NaN	NaN	15.8308	15.9317	15.9486				-1	8	5	5	13	8.9	8.9	97.316	0	80.898	1113200	47	24	NbE03059573.1;NbD000597.1	NbE03059573.1;NbD000597.1	26
21.277	21.2508	20.9692	21.0505	20.936	20.9862				-1	39	39	2	49.1	49.1	2.9	83.327	0	323.31	71076000	39	288	NbD000717.1	NbD000717.1	32
16.2305	15.9834	16.2746	17.4527	17.1104	17.1851				-1	6	3	3	17.6	17	17	17.4	0	268.52	4677900	11	38	NbD034983.1;NbD005190.1;NbD000793.1;NbD051419.1;NbD023244.1;NbD022731.1	NbD034983.1;NbD005190.1;NbD000793.1;NbD051419.1;NbD023244.1;NbD022731.1	41
17.4564	17.2014	17.6181	17.0197	17.0863	16.8461				-1	4	4	4	17.4	17.4	17.4	29.908	0	110.17	4399000	9	41	NbD004804.1;NbD000808.1	NbD004804.1;NbD000808.1	42
18.2994	18.335	18.329	18.088	18.1844	18.0277				-1	14	14	3	34.9	34.9	8.6	51.251	0	255.81	8322900	27	91	NbD000821.1	NbD000821.1	43
18.1853	18.1589	18.1112	17.4805	17.4566	17.3923				-1	24	24	24	34.3	34.3	34.3	91.866	0	323.31	15060000	47	157	NbD000885.1	NbD000885.1	47
16.4736	16.1854	16.774	16.5645	NaN	16.3976				-1	1	1	1	9.4	9.4	9.4	20.849	0	26.868	1708200	11	23	NbE03062109.1;NbD037613.1;NbD000955.1	NbE03062109.1;NbD037613.1;NbD000955.1	49
NaN	NaN	14.6249	17.2029	16.9098	16.9395				-1	10	10	4	42.8	42.8	19.6	21.975	0	132.67	4053800	10	59	NbD022454.1;NbD000971.1;NbD001902.1;NbD009944.1	NbD022454.1;NbD000971.1;NbD001902.1	50
15.1829	15.2509	NaN	15.2076	NaN	NaN				-1	1	1	1	6.2	6.2	6.2	23.489	0	14.4	352680	11	9	NbD001012.1;NbD043787.1;NbE05064329.1;NbD040627.1;NbD051532.1	NbD001012.1;NbD043787.1;NbE05064329.1;NbD040627.1;NbD051532.1	51
NaN	NaN	NaN	15.2912	15.1551	15.0475				-1	2	2	2	7.4	7.4	7.4	24.622	0	18.842	531370	10	10	NbD035474.1;NbD001029.1;NbD033517.1;NbD027909.1	NbD035474.1;NbD001029.1;NbD033517.1;NbD027909.1	52
16.442	16.6486	NaN	15.8209	16.1284	NaN				-1	3	3	3	9.3	9.3	9.3	46.712	0	18.739	926240	21	14	NbD050412.1;NbD001051.1	NbD050412.1;NbD001051.1	55
NaN	NaN	NaN	16.619	16.6193	16.4978				-1	3	3	3	25.2	25.2	25.2	11.77	0	59.625	2256100	6	29	NbD028652.1;NbD022971.1;NbD001068.1;NbE03061671.1	NbD028652.1;NbD022971.1;NbD001068.1;NbE03061671.1	56
17.3625	17.2725	17.5767	17.1714	17.175	17.1511				-1	4	4	4	26.9	26.9	26.9	22.276	0	57.341	3638000	14	35	NbD001253.1;NbD050116.1	NbD001253.1;NbD050116.1	65
NaN	NaN	NaN	15.1248	15.3021	15.3793				-1	2	1	1	6.1	3.6	3.6	51.022	0	29.005	322090	18	11	NbD024491.1;NbE03060262.1;NbD001303.1	NbD024491.1;NbE03060262.1;NbD001303.1	69
NaN	NaN	NaN	16.3489	16.5972	16.3687				-1	1	1	1	6.3	6.3	6.3	30.096	0	28.437	1028200	12	12	NbD001333.1;NbD007942.1;NbE03060837.1;NbE03062469.1	NbD001333.1;NbD007942.1;NbE03060837.1;NbE03062469.1	71
NaN	NaN	NaN	16.1361	16.1778	16.043				-1	3	3	1	5.9	5.9	3	102.14	0	25.867	1064900	45	17	NbD001415.1;NbE05065485.1;NbD015542.1	NbD001415.1;NbE05065485.1	76
16.5613	16.8026	16.5665	NaN	NaN	NaN				-1	15	3	3	26.5	5.7	5.7	94.381	0	29.066	456850	40	8	NbD001421.1;NbD045383.1;NbE03057707.1;NbE03060203.1;NbE03054497.1;NbE03060607.1;NbE05064295.1	NbD001421.1;NbD045383.1;NbE03057707.1;NbE03060203.1	77
NaN	NaN	NaN	14.0369	13.8401	14.0446				-1	2	2	1	10	10	4.4	43.682	0	41.988	171870	26	9	NbD001463.1	NbD001463.1	79
16.4662	NaN	NaN	17.1484	17.0741	17.1703				-1	2	2	2	6.2	6.2	6.2	26.928	0	14.606	1388800	13	15	NbE03061005.1;NbD001486.1;NbD014314.1	NbE03061005.1;NbD001486.1;NbD014314.1	81
17.0886	16.9532	16.8656	16.6673	16.9897	17.0149				-1	6	6	3	16.5	16.5	9.1	49.779	0	70.873	2839900	20	35	NbD001607.1;NbD049317.1;NbD052009.1;NbE44073149.1	NbD001607.1;NbD049317.1	89
15.6907	15.7529	15.6888	15.3566	15.3916	15.4158				-1	3	3	3	11.8	11.8	11.8	49.905	0	41.849	689170	21	20	NbE03056145.1;NbD015832.1;NbD001618.1	NbE03056145.1;NbD015832.1;NbD001618.1	90
17.4602	17.6586	17.437	17.449	17.3195	17.4269				-1	12	12	10	25.8	25.8	25.8	68.399	0	214.98	6474000	22	85	NbD001635.1;NbD049141.1;NbE44071034.1;NbD050521.1;NbD033830.1;NbE05063305.1;NbE05068629.1;NbD033831.1;NbE03059885.1;NbE03059355.1;NbD033834.1;NbD002878.1;NbD002877.1	NbD001635.1;NbD049141.1;NbE44071034.1	91
16.277	16.2897	16.1135	NaN	16.2083	NaN				-1	5	5	3	14.3	14.3	6.5	46.688	0	56.452	790690	19	19	NbD001659.1;NbE05067714.1	NbD001659.1;NbE05067714.1	93
17.8221	17.811	17.8214	18.275	18.2264	18.2883				-1	6	6	2	18.9	18.9	10	31.336	0	154.11	7100300	12	60	NbD001815.1;NbE05067944.1	NbD001815.1;NbE05067944.1	102
NaN	NaN	NaN	15.8853	15.9643	16.0197				-1	5	5	5	52.2	52.2	52.2	20.618	0	64.977	907070	14	20	NbD001875.1	NbD001875.1	103
19.3974	19.2463	19.3951	18.9419	18.9373	18.7958				-1	20	20	2	39.1	39.1	3	55.465	0	323.31	38573000	21	196	NbD001885.1;NbD021566.1	NbD001885.1	104
15.7397	16.1003	15.3464	16.0679	15.8933	16.1163				-1	7	7	1	23.5	23.5	5.5	46.608	0	182.72	1731500	19	44	NbD001938.1	NbD001938.1	108
20.6179	20.4761	20.5662	19.9234	20.2513	19.7368				-1	28	28	28	62.3	62.3	62.3	24.204	0	323.31	34313000	12	165	NbD035639.1;NbD001974.1	NbD035639.1;NbD001974.1	112
16.1621	15.8563	16.2957	17.3386	17.3061	17.3221				-1	10	10	4	8.8	8.8	5.1	147.82	0	154.94	3437000	60	66	NbE05063289.1;NbD002047.1	NbE05063289.1;NbD002047.1	113
15.1924	NaN	NaN	15.3527	15.4478	15.2753				-1	4	4	4	27.7	27.7	27.7	26.287	0	73.514	618030	16	20	NbE05066099.1;NbD002068.1	NbE05066099.1;NbD002068.1	114
17.5758	17.984	17.8683	17.7108	17.7842	17.871				-1	5	5	5	21.9	21.9	21.9	33.507	0	68.28	4478000	19	42	NbE05062792.1;NbD002107.1	NbE05062792.1;NbD002107.1	116
19.0675	19.1143	18.9698	19.938	19.8743	19.8537				-1	18	18	3	20.3	20.3	5	137.07	0	293.16	16869000	67	110	NbE03057694.1;NbD002127.1;NbD002128.1;NbD050332.1	NbE03057694.1;NbD002127.1;NbD002128.1	117
14.9767	14.9653	NaN	NaN	15.3648	NaN				-1	3	3	1	3.3	3.3	1.4	122.46	0	21.099	647130	50	15	NbD002142.1	NbD002142.1	118
NaN	NaN	NaN	20.2219	20.2334	20.2069				-1	4	4	2	35	35	23.1	15.906	0	75.179	11514000	9	28	NbD002190.1;NbD013740.1;NbE03056937.1	NbD002190.1;NbD013740.1;NbE03056937.1	121
19.5027	19.4697	19.6106	19.6124	19.6042	19.5908				-1	10	10	4	50	50	27.9	18.103	0	104.41	33840000	10	138	NbD002217.1;NbD000150.1	NbD002217.1	122
14.6015	14.0081	14.9083	18.8667	18.9444	19.0662				-1	34	34	11	78.1	78.1	32	44.847	0	323.31	34992000	23	172	NbD002220.1	NbD002220.1	123
16.6168	16.2278	16.8504	16.4493	16.2526	16.46				-1	3	3	3	31.4	31.4	31.4	15.326	0	49.511	2093200	9	22	NbD041143.1;NbD002230.1	NbD041143.1;NbD002230.1	124
18.6203	18.3215	18.4424	18.7559	18.6089	18.5307				-1	7	7	4	43.3	43.3	30.3	29.172	0	117.26	5029300	17	40	NbD002277.1;NbD033476.1	NbD002277.1;NbD033476.1	126
15.5226	NaN	15.5974	15.8872	NaN	NaN				-1	4	4	4	18.6	18.6	18.6	38.067	0	26.269	475710	17	14	NbD002281.1;NbE44071408.1	NbD002281.1;NbE44071408.1	127
15.8285	15.7416	16.274	16.0464	15.9512	16.1861				-1	3	3	3	36.7	36.7	36.7	16.075	0	45.684	1970700	6	21	NbE03061602.1;NbD034105.1;NbD002350.1;NbD034452.1	NbE03061602.1;NbD034105.1;NbD002350.1	131
15.8502	15.9277	14.8693	15.2764	14.8533	14.8409				-1	4	4	4	40.9	40.9	40.9	19.63	0	74.679	673090	10	21	NbD050701.1;NbD015031.1;NbD051894.1;NbD045377.1;NbD028500.1;NbD009974.1;NbD003304.1;NbD022085.1;NbD002419.1;NbE03053680.1;NbE05068052.1;NbD010029.1;NbD002638.1	NbD050701.1;NbD015031.1;NbD051894.1;NbD045377.1;NbD028500.1;NbD009974.1;NbD003304.1;NbD022085.1;NbD002419.1;NbE03053680.1;NbE05068052.1;NbD010029.1;NbD002638.1	133
14.2146	14.6953	14.7852	16.2532	16.4829	16.4854				-1	7	7	7	11.6	11.6	11.6	100.32	0	75.486	1795000	50	36	NbD002583.1;NbE05068690.1;NbD005526.1	NbD002583.1;NbE05068690.1;NbD005526.1	136
NaN	15.926	16.2677	15.6805	15.8001	NaN				-1	3	3	1	9.7	9.7	2.6	80.116	0	27.536	963710	38	20	NbE05067600.1;NbD002601.1	NbE05067600.1;NbD002601.1	137
20.6835	20.645	20.6685	20.999	21.0844	21.0294				-1	33	33	25	77.7	77.7	58.9	35.848	0	323.31	86456000	19	323	NbD002609.1	NbD002609.1	138
14.3068	NaN	14.5858	NaN	14.4986	14.4386				-1	3	3	3	7.4	7.4	7.4	50.117	0	30.82	228550	21	15	NbE03060560.1;NbD002637.1	NbE03060560.1;NbD002637.1	141
15.8003	15.9309	16.0693	16.2145	16.3299	16.3366				-1	1	1	1	0.7	0.7	0.7	175.78	0	23.609	1154800	77	18	NbD002653.1;NbE05066214.1;NbD014090.1	NbD002653.1;NbE05066214.1;NbD014090.1	143
NaN	NaN	NaN	15.7371	15.8496	15.9452				-1	2	2	2	4.3	4.3	4.3	118.78	0	23.253	559830	56	11	NbE03058227.1;NbD011024.1;NbD002695.1	NbE03058227.1;NbD011024.1;NbD002695.1	145
16.3022	15.7451	15.8508	16.0678	15.8443	15.8988				-1	4	4	4	18.7	18.7	18.7	36.71	0	58.844	1067800	11	25	NbD011032.1;NbD002699.1	NbD011032.1;NbD002699.1	146
17.5275	17.5865	17.6222	NaN	NaN	NaN				-1	4	4	4	15.6	15.6	15.6	32.916	0	113.45	3307800	18	20	NbD046389.1;NbD002741.1	NbD046389.1;NbD002741.1	150
16.0721	16.0663	NaN	17.3001	17.1746	17.2113				-1	5	5	2	22.3	22.3	11.2	23.056	0	71.965	2915100	11	34	NbD037012.1;NbD002769.1	NbD037012.1;NbD002769.1	151
NaN	NaN	NaN	17.2948	17.1588	17.2107				-1	5	5	1	19.7	19.7	3.8	29.888	0	159.26	2401300	16	29	NbD002901.1	NbD002901.1	154
NaN	NaN	NaN	15.7527	15.7559	15.8158				-1	11	11	8	20.9	20.9	17	101.03	0	131.01	1705200	49	42	NbE03057099.1;NbD002939.1	NbE03057099.1;NbD002939.1	156
15.4192	15.3519	15.7524	18.512	18.7009	18.6712				-1	14	14	3	44.2	44.2	15.8	44.696	0	240.15	10444000	19	83	NbD002963.1;NbD015297.1	NbD002963.1;NbD015297.1	157
17.105	17.31	16.6187	NaN	16.0459	16.0991				-1	5	5	4	30	30	23.8	32.428	0	38.101	1321500	13	19	NbD039430.1;NbD002971.1	NbD039430.1;NbD002971.1	158
16.2847	16.2381	16.4387	16.4853	16.6549	16.5032				-1	11	11	11	18.4	18.4	18.4	73.377	0	157.95	3296800	33	52	NbD003208.1	NbD003208.1	171
16.2368	16.0565	16.0787	16.4807	16.4758	16.5379				-1	11	11	5	8.1	8.1	4.8	144.95	0	128.58	4175300	56	77	NbE44071147.1;NbE03054693.1;NbD003232.1	NbE44071147.1;NbE03054693.1;NbD003232.1	172
18.1093	17.9599	17.6351	18.2251	18.2	18.1897				-1	13	13	12	47.7	47.7	42.8	34.224	0	117.62	5575000	15	58	NbD003274.1;NbD038065.1;NbE05064614.1	NbD003274.1;NbD038065.1;NbE05064614.1	174
15.0378	14.8745	15.406	16.7664	16.837	16.6471				-1	9	9	9	39.4	39.4	39.4	20.653	0	131.51	3294500	8	64	NbE03054093.1;NbD003313.1;NbD019693.1	NbE03054093.1;NbD003313.1;NbD019693.1	178
20.3042	20.455	20.4932	20.5672	20.49	20.4657				-1	13	13	5	50.4	50.4	28	25.774	0	323.31	40460000	11	106	NbE03056876.1;NbD003315.1;NbD026108.1	NbE03056876.1;NbD003315.1	179
14.7989	NaN	NaN	16.5197	16.402	16.4704				-1	10	5	5	21.2	8.9	8.9	59.731	0	55.146	979710	27	18	NbD003333.1	NbD003333.1	180
16.604	16.7004	16.103	16.6345	16.8124	16.8823				-1	4	4	4	21.1	21.1	21.1	31.126	0	60.773	2296800	15	26	NbD037868.1;NbD003344.1;NbD015367.1;NbD017703.1;NbE03053946.1;NbE05062860.1	NbD037868.1;NbD003344.1;NbD015367.1;NbD017703.1;NbE03053946.1;NbE05062860.1	182
13.8746	NaN	NaN	14.889	14.9476	15.0027				-1	1	1	1	5.9	5.9	5.9	29.357	0	45.615	431240	13	14	NbE44074514.1;NbD037856.1;NbD003354.1	NbE44074514.1;NbD037856.1;NbD003354.1	183
NaN	NaN	NaN	15.7403	15.5715	15.717				-1	3	3	3	24.4	24.4	24.4	30.28	0	45.231	556220	13	13	NbD003433.1;NbD026038.1;NbE05063431.1	NbD003433.1;NbD026038.1;NbE05063431.1	186
NaN	NaN	NaN	18.1476	17.8735	18.0752				-1	6	6	2	24.1	24.1	14.5	28.291	0	87.61	2503400	9	23	NbD003525.1;NbD013869.1;NbD004501.1;NbD010443.1	NbD003525.1;NbD013869.1;NbD004501.1;NbD010443.1	192
NaN	NaN	NaN	16.9184	16.3317	16.598				-1	6	6	6	33.1	33.1	33.1	20.013	0	61.407	1962700	8	22	NbD013144.1;NbD003598.1;NbD049416.1;NbD046368.1	NbD013144.1;NbD003598.1;NbD049416.1;NbD046368.1	197
17.1528	17.0016	17.3841	16.8313	17.0079	16.9213				-1	8	8	2	29.6	29.6	8.3	35.769	0	68.785	3231600	19	38	NbD003600.1	NbD003600.1	198
16.3473	16.2372	16.273	16.5828	16.7423	16.633				-1	7	7	7	19.4	19.4	19.4	47.501	0	92.324	2630800	25	46	NbD003605.1;NbD025203.1;NbD028572.1	NbD003605.1;NbD025203.1;NbD028572.1	200
18.2349	18.2639	17.5674	NaN	17.1484	17.5477				-1	4	4	3	32.2	32.2	23.7	13.369	0	26.957	1788000	8	18	NbD003607.1;NbE03061286.1;NbD004351.1;NbD042181.1	NbD003607.1;NbE03061286.1;NbD004351.1	201
17.776	17.6205	17.8621	17.8378	17.7551	17.6875				-1	2	2	2	7.7	7.7	7.7	20.053	0	71.599	2321800	8	15	NbD003620.1;NbD012723.1	NbD003620.1;NbD012723.1	203
NaN	15.5687	15.5165	15.9386	16.1314	16.2898				-1	2	2	2	7	7	7	35.58	0	13.226	1187400	18	23	NbD003622.1;NbE03061483.1;NbD012720.1	NbD003622.1;NbE03061483.1;NbD012720.1	204
19.3318	19.2132	19.3427	19.9901	19.8883	19.9078				-1	14	14	4	30.4	30.4	15.7	52.566	0	195.67	25077000	27	112	NbD003658.1	NbD003658.1	205
NaN	NaN	NaN	17.3018	17.5351	17.631				-1	22	4	4	54.2	10.2	10.2	46.88	0	107.69	1796100	23	15	NbD003818.1;NbE44072656.1;NbD038573.1;NbE05067836.1;NbD020504.1;NbE03059078.1;NbD044148.1;NbD025859.1	NbD003818.1;NbE44072656.1	211
16.6227	16.4441	16.4042	16.9249	16.9597	17.1584				-1	4	4	4	9	9	9	67.831	0	77.856	1711100	18	17	NbD006212.1;NbE05064822.1;NbD003821.1	NbD006212.1;NbE05064822.1;NbD003821.1	212
NaN	NaN	NaN	17.8406	17.8662	18.0253				-1	4	4	4	10.4	10.4	10.4	70.907	0	92.5	2629100	35	24	NbD003870.1;NbE03053355.1;NbD002890.1	NbD003870.1;NbE03053355.1;NbD002890.1	217
16.7499	16.9204	17.1659	17.1914	17.2833	17.2323				-1	8	8	5	69.1	69.1	48.2	12.319	0	323.31	5797700	5	63	NbE03060197.1;NbD031121.1;NbD003914.1	NbE03060197.1;NbD031121.1;NbD003914.1	220
16.5781	16.4346	16.3597	15.9081	15.8177	15.7443				-1	5	5	5	20.1	20.1	20.1	46.163	0	129.05	1114600	25	22	NbD003922.1;NbE44074037.1;NbD003233.1;NbD026186.1;NbD021688.1;NbE05068076.1	NbD003922.1;NbE44074037.1;NbD003233.1;NbD026186.1;NbD021688.1;NbE05068076.1	221
20.8632	20.8673	20.7255	19.711	19.7279	19.7623				-1	44	44	4	49.9	49.9	12.6	80.268	0	323.31	183230000	34	602	NbD003943.1;NbD030459.1;NbE44071578.1	NbD003943.1;NbD030459.1;NbE44071578.1	222
15.8777	15.8483	15.3913	15.3998	15.2492	15.6984				-1	5	5	5	18.7	18.7	18.7	39.449	0	35.179	881460	18	26	NbD003945.1;NbD030458.1;NbD029274.1	NbD003945.1;NbD030458.1	223
NaN	15.9593	NaN	16.6465	16.6896	16.7775				-1	10	3	3	11	1.6	1.6	135.17	0	52.086	1430900	67	21	NbD004040.1	NbD004040.1	229
NaN	NaN	16.0574	15.7689	15.555	15.6259				-1	2	2	2	4.8	4.8	4.8	52.011	0	73.655	1004000	21	20	NbE05068715.1;NbD047330.1;NbD004157.1	NbE05068715.1;NbD047330.1;NbD004157.1	236
NaN	NaN	17.2989	16.5548	16.8618	16.5706				-1	3	3	3	14.8	14.8	14.8	30.623	0	138.11	2253700	18	19	NbD004296.1;NbD023390.1	NbD004296.1;NbD023390.1	243
NaN	NaN	NaN	16.0233	15.9992	15.9036				-1	3	3	0	5.5	5.5	0	97.361	0	55.296	1083800	44	22	NbE05068122.1;NbD045394.1;NbD004375.1;NbD010161.1;NbD035088.1;NbE44073814.1	NbE05068122.1;NbD045394.1;NbD004375.1	246
19.4008	19.8631	19.5744	18.8545	18.9248	19.025				-1	26	26	7	59.3	59.3	11.1	42.813	0	323.31	27506000	23	171	NbD004396.1	NbD004396.1	248
19.5853	19.8538	19.3928	19.1938	19.1894	19.2575				-1	15	15	7	59.2	59.2	37.2	34.758	0	271.91	24117000	14	137	NbD004403.1	NbD004403.1	250
17.1095	17.2326	17.1439	16.9091	17.0843	16.9791				-1	13	13	7	48.2	48.2	28.4	39.556	0	312.8	4367300	19	73	NbD004407.1	NbD004407.1	252
17.765	17.8603	17.0811	16.5035	17.0119	17.1749				-1	3	3	1	23.4	23.4	5.2	31.336	0	39.782	1988300	19	22	NbD004513.1	NbD004513.1	255
NaN	NaN	NaN	17.649	17.5964	17.18				-1	7	7	7	89.2	89.2	89.2	7.4666	0	63.337	10858000	3	45	NbD051686.1;NbD029155.1;NbD012968.1;NbD006401.1;NbD004560.1;NbD000411.1	NbD051686.1;NbD029155.1;NbD012968.1;NbD006401.1;NbD004560.1;NbD000411.1	257
15.8622	15.2589	15.8387	15.9372	15.8562	15.7667				-1	11	11	2	16.7	16.7	4	105.02	0	112.61	2568800	48	56	NbD005345.1;NbD004594.1;NbE05063837.1;NbE05068705.1;NbD049696.1;NbD014616.1;NbD051114.1	NbD005345.1;NbD004594.1;NbE05063837.1	260
NaN	NaN	NaN	15.8066	15.6846	15.6963				-1	1	1	1	4.5	4.5	4.5	40.345	0	19.58	528950	17	10	NbE44071352.1;NbD004675.1;NbD016832.1	NbE44071352.1;NbD004675.1;NbD016832.1	265
NaN	NaN	NaN	16.1229	15.6848	15.7961				-1	8	2	2	27.7	10.1	10.1	44.83	0	54.887	1223600	19	15	NbD004677.1;NbE03062168.1;NbD016829.1	NbD004677.1;NbE03062168.1;NbD016829.1	266
15.8498	15.9856	16.011	15.4003	15.3468	15.342				-1	5	5	5	15.9	15.9	15.9	42.948	0	44.893	1031100	25	23	NbD004760.1;NbD008451.1	NbD004760.1	268
15.6636	15.8839	NaN	15.73	15.8863	15.9492				-1	4	4	3	21.3	21.3	13.3	34.356	0	31.483	972510	17	21	NbD004880.1;NbE03057179.1;NbD052064.1	NbD004880.1;NbE03057179.1;NbD052064.1	276
15.4166	NaN	NaN	15.2235	15.4497	15.4193				-1	1	1	1	8.1	8.1	8.1	20.005	0	27.713	651120	7	16	NbD028896.1;NbD004889.1	NbD028896.1;NbD004889.1	277
NaN	NaN	NaN	17.3199	17.3022	17.3418				-1	8	8	8	13.7	13.7	13.7	57.401	0	269.71	4810000	20	56	NbD004937.1	NbD004937.1	280
17.7599	17.486	17.2824	17.0045	17.0347	17.0034				-1	8	8	8	20	20	20	33.469	0	130.41	4684700	17	58	NbE03057196.1;NbD024654.1;NbD004954.1	NbE03057196.1;NbD024654.1;NbD004954.1	282
15.6317	15.6529	NaN	15.7496	15.46	15.6586				-1	6	6	6	15.1	15.1	15.1	69.499	0	46.195	1078700	38	29	NbD005010.1;NbE03061041.1;NbE44074502.1;NbD014748.1;NbD023504.1;NbE05068659.1	NbD005010.1;NbE03061041.1;NbE44074502.1;NbD014748.1;NbD023504.1;NbE05068659.1	284
19.7336	19.6915	19.4672	18.5468	18.5783	18.5818				-1	8	8	2	14.9	14.9	2.8	47.147	0	219.75	9492300	12	40	NbE05066401.1;NbD005115.1	NbE05066401.1;NbD005115.1	290
15.9579	16.0653	15.9419	16.5626	16.4695	16.4883				-1	11	11	11	20.3	20.3	20.3	98.615	0	222.86	3222700	44	69	NbD005127.1;NbE44073258.1;NbE03055766.1;NbD005127.2;NbD010743.1	NbD005127.1;NbE44073258.1;NbE03055766.1;NbD005127.2;NbD010743.1	292
15.1583	NaN	NaN	NaN	15.4682	15.2911				-1	3	2	2	12.1	9	9	42.745	0	14.62	561890	22	17	NbD005165.1;NbD042982.1	NbD005165.1;NbD042982.1	298
16.7978	16.7569	16.5922	16.9697	16.7691	17.0842				-1	14	14	14	38.5	38.5	38.5	33.115	0	151.05	5550700	15	74	NbD005184.1;NbD013187.1	NbD005184.1;NbD013187.1	299
15.9844	NaN	NaN	15.2601	15.2883	15.2732				-1	3	1	1	19.5	8.6	8.6	29.422	0.001574	9.8188	563430	10	14	NbD005273.1	NbD005273.1	303
NaN	16.451	16.5865	NaN	16.7725	16.752				-1	2	2	2	6.1	6.1	6.1	26.416	0	14.229	1708200	9	19	NbD038510.1;NbD005340.1	NbD038510.1;NbD005340.1	308
17.115	NaN	17.2685	16.7532	16.5653	16.5651				-1	3	3	3	12.7	12.7	12.7	33.419	0	44.916	2168600	18	27	NbD005361.1;NbE03059628.1	NbD005361.1;NbE03059628.1	311
15.2357	15.3404	15.1265	NaN	NaN	NaN				-1	1	1	1	0.9	0.9	0.9	149.43	0.0013787	7.3472	295330	73	9	NbE05066551.1;NbD005386.1	NbE05066551.1;NbD005386.1	314
NaN	14.5105	NaN	14.579	NaN	14.792				-1	3	3	3	4	4	4	56.185	0	22.786	540680	23	16	NbD042083.1;NbD005389.1;NbD024876.1	NbD042083.1;NbD005389.1;NbD024876.1	315
15.9391	15.6076	16.168	15.0207	15.0236	NaN				-1	3	3	3	21.1	21.1	21.1	20.037	0	71.046	885620	12	30	NbD005404.1;NbE03058841.1;NbD009906.1	NbD005404.1;NbE03058841.1	317
NaN	NaN	NaN	19.8618	19.8038	19.779				-1	11	11	4	30.2	30.2	14	48.449	0	318.05	20465000	16	65	NbD005408.1	NbD005408.1	318
18.7678	18.6827	18.8302	18.3205	18.3049	18.2945				-1	18	18	4	34	34	9.3	79.79	0	323.31	16673000	34	129	NbD005444.1	NbD005444.1	319
16.7815	17.0077	16.8358	16.9092	16.8924	16.9097				-1	6	6	4	38.4	38.4	26.3	25.237	0	57.24	3014500	8	32	NbD005456.1;NbD003040.1	NbD005456.1;NbD003040.1	322
19.7071	19.7846	19.5681	21.047	21.0309	21.0855				-1	27	27	5	56.7	56.7	10.2	46.83	0	323.31	47393000	24	228	NbD052593.1;NbD005493.1;NbD007263.1;NbD006370.1;NbE44070398.1	NbD052593.1;NbD005493.1	324
17.3971	17.3455	17.492	16.6334	16.9508	16.8076				-1	6	6	6	20.5	20.5	20.5	33.302	0	112.21	2595400	16	38	NbD008802.1;NbD005522.1	NbD008802.1;NbD005522.1	327
19.2743	19.1988	19.2578	19.4492	19.4673	19.4395				-1	20	20	7	78.3	78.3	43.7	36.061	0	323.31	37511000	14	165	NbD005550.1	NbD005550.1	328
14.8837	14.8935	14.7287	14.9318	15.0355	15.0386				-1	2	2	1	10.2	10.2	6.4	39.407	0	27.228	756580	19	24	NbD005565.1	NbD005565.1	329
16.5042	16.2073	16.1924	16.2186	16.2851	16.2187				-1	9	9	9	56.5	56.5	56.5	25.225	0	155.5	2969900	12	55	NbD005637.1	NbD005637.1	331
19.1186	19.0771	19.1317	19.5444	19.3877	19.6024				-1	13	13	13	71.4	71.4	71.4	22.289	0	323.31	22256000	17	117	NbE05067575.1;NbD005638.1;NbE44069874.1;NbE44069873.1	NbE05067575.1;NbD005638.1;NbE44069874.1;NbE44069873.1	332
17.43	17.2805	17.4504	17.5103	17.5354	17.4954				-1	12	12	3	33.1	33.1	12.8	59.431	0	272.59	5584400	29	91	NbD005649.1	NbD005649.1	333
16.4976	16.4335	15.6194	16.9672	16.8349	16.937				-1	6	6	6	17	17	17	35.39	0	52.261	3492100	14	51	NbD005697.1;NbD032078.1	NbD005697.1;NbD032078.1	334
NaN	NaN	NaN	17.3373	17.3143	17.3468				-1	8	8	1	23.1	23.1	3.3	44.41	0	96.92	2806200	24	41	NbD005717.1	NbD005717.1	335
NaN	NaN	NaN	17.778	17.3893	17.5673				-1	11	11	5	35	35	28.2	32.31	0	159.07	5123800	21	55	NbD005751.1	NbD005751.1	338
15.6826	15.8032	15.211	NaN	NaN	NaN				-1	2	2	2	9.5	9.5	9.5	24.563	0	18.436	403610	11	10	NbD028865.1;NbD005771.1	NbD028865.1;NbD005771.1	341
15.6153	15.4023	15.3448	14.8629	15.2735	NaN				-1	6	6	6	19.8	19.8	19.8	47.312	0	48.17	739530	23	23	NbE05067406.1;NbD028863.1;NbD005773.1;NbE44070422.1;NbD048162.1;NbD024886.1	NbE05067406.1;NbD028863.1;NbD005773.1;NbE44070422.1	342
NaN	NaN	NaN	15.1564	15.0767	15.222				-1	3	3	3	7.9	7.9	7.9	60.064	0	44.626	623530	26	15	NbD011838.1;NbD005795.1	NbD011838.1;NbD005795.1	343
16.5724	16.6422	16.3398	15.9871	16.0977	16.1431				-1	7	7	7	33	33	33	22.98	0	94.457	1747900	12	31	NbD005834.1;NbE44072125.1	NbD005834.1;NbE44072125.1	345
16.6859	16.5713	16.5046	16.3287	16.379	16.2758				-1	4	4	2	32.4	32.4	11.8	15.327	0	60.892	1439800	6	31	NbD005848.1;NbE44070594.1	NbD005848.1;NbE44070594.1	346
17.5863	17.8618	17.2197	17.5284	17.5462	17.4461				-1	16	16	15	47.5	47.5	46.5	35.54	0	208.07	6101600	19	87	NbD005868.1;NbD049165.1;NbE05067102.1;NbD039956.1;NbD027399.1;NbE03055729.1;NbD001085.1	NbD005868.1	348
NaN	NaN	NaN	16.6119	16.5816	16.7377				-1	11	1	0	50	10.9	0	17.759	0	27.278	993950	7	14	NbD046070.1;NbD013798.1;NbD010028.1;NbD005951.1;NbD041065.1	NbD046070.1;NbD013798.1;NbD010028.1;NbD005951.1;NbD041065.1	351
17.9612	18.0148	17.6635	17.953	18.1021	18.1272				-1	3	3	2	19.1	19.1	19.1	24.77	0	61.968	3515100	11	28	NbD006024.1;NbE05068218.1;NbE03054247.1	NbD006024.1;NbE05068218.1	353
18.2989	18.4654	17.8189	17.6791	17.6093	17.7519				-1	16	4	3	28.3	5.1	4.3	56.384	0	61.638	4362400	25	27	NbD025147.1;NbE05064292.1;NbD006149.1	NbD025147.1;NbE05064292.1;NbD006149.1	360
14.7191	14.3703	14.3557	18.5881	18.051	18.5784				-1	23	23	18	21.8	21.8	18.4	111.58	0	323.31	10413000	53	110	NbE03057974.1;NbD006156.1	NbE03057974.1;NbD006156.1	361
15.7243	NaN	NaN	15.4603	NaN	14.3007				-1	5	5	2	6.3	6.3	2	138.03	0	42.968	704900	59	19	NbD006165.1;NbE03057382.1	NbD006165.1;NbE03057382.1	363
14.5528	14.5479	14.7692	15.2013	15.1643	15.1091				-1	4	4	4	7	7	7	106.76	0	66.117	719540	40	24	NbE05063684.1;NbD006276.1;NbD036602.1;NbE05064569.1	NbE05063684.1;NbD006276.1;NbD036602.1;NbE05064569.1	364
NaN	NaN	NaN	17.2911	16.9401	16.9318				-1	4	4	4	17.9	17.9	17.9	25.154	0	37.903	1539200	17	20	NbD031529.1;NbE05068423.1;NbD006299.1;NbE03057916.1;NbD020517.1	NbD031529.1;NbE05068423.1;NbD006299.1;NbE03057916.1;NbD020517.1	365
16.1045	16.3951	16.0724	15.7846	16.1957	15.8172				-1	3	3	3	10.3	10.3	10.3	47.773	0	32.886	1092800	28	22	NbD050710.1;NbD010379.1;NbD007227.1;NbD006392.1;NbD034685.1;NbE44072390.1	NbD050710.1;NbD010379.1;NbD007227.1;NbD006392.1	371
18.1931	18.1763	17.836	17.3931	17.7791	17.4675				-1	8	2	2	21.6	4.3	4.3	45.016	0	152.4	3028300	19	22	NbD040873.1;NbD006492.1;NbD038588.1;NbD042030.1;NbE44072140.1;NbD041021.1;NbD043235.1;NbD018839.1	NbD040873.1;NbD006492.1	379
17.5997	16.9815	17.4632	17.7502	17.9057	18.0497				-1	5	5	5	6.1	6.1	6.1	95.509	0	51.802	4695500	42	44	NbE03057609.1;NbE03060088.1;NbD027331.1;NbD006530.1	NbE03057609.1;NbE03060088.1;NbD027331.1;NbD006530.1	381
17.1166	17.1987	16.9254	17.4754	17.3378	17.3042				-1	6	6	6	30.2	30.2	30.2	37.076	0	106.04	4610600	22	43	NbE05063613.1;NbD006612.1	NbE05063613.1;NbD006612.1	387
17.0389	17.2148	16.9706	17.861	17.8041	17.9872				-1	8	8	8	16.6	16.6	16.6	75.147	0	130.56	4933900	31	64	NbD006717.1	NbD006717.1	392
18.1827	18.295	17.8481	18.2315	18.1684	18.4315				-1	4	4	3	45.6	45.6	34.9	16.833	0	205.13	6230600	9	40	NbD052653.1;NbD052504.1;NbD050959.1;NbD008144.1;NbD006753.1;NbD033588.1;NbD039934.1;NbD022239.1;NbD038786.1	NbD052653.1;NbD052504.1;NbD050959.1;NbD008144.1;NbD006753.1;NbD033588.1;NbD039934.1;NbD022239.1;NbD038786.1	393
14.9575	14.9752	14.4975	NaN	14.471	NaN				-1	2	2	2	10	10	10	43.922	0	20.006	250190	20	14	NbD038781.1;NbD006757.1	NbD038781.1;NbD006757.1	394
NaN	16.0923	NaN	NaN	16.0977	16.0696				-1	3	3	3	3.4	3.4	3.4	120.31	0	28.062	719960	53	13	NbD048612.1;NbE05063915.1;NbD006858.1;NbD000286.1;NbE03061294.1	NbD048612.1;NbE05063915.1;NbD006858.1	399
15.494	15.491	15.6203	15.7253	15.7468	15.8122				-1	2	2	2	13	13	13	28.883	0	41.296	903890	16	23	NbE44071081.1;NbE44069864.1;NbD006940.1;NbE03055949.1;NbD019801.1	NbE44071081.1;NbE44069864.1;NbD006940.1;NbE03055949.1;NbD019801.1	402
NaN	NaN	NaN	15.2485	15.2259	15.3174				-1	6	6	4	4	4	2.7	264.64	0	64.006	790200	103	20	NbE03056006.1;NbD007021.1	NbE03056006.1;NbD007021.1	406
NaN	15.1351	NaN	16.5001	16.3872	16.4545				-1	8	2	2	6.4	2.7	2.7	152.38	0	118.11	849480	64	17	NbD007175.1;NbE03060263.1	NbD007175.1;NbE03060263.1	413
NaN	16.5597	NaN	15.7106	15.6566	NaN				-1	1	1	1	4.1	4.1	4.1	39.58	0	13.652	486410	17	13	NbE03057867.1;NbD048036.1;NbD007220.1	NbE03057867.1;NbD048036.1;NbD007220.1	418
17.1019	16.9468	17.2169	16.604	16.6362	16.8621				-1	13	13	12	28.7	28.7	28.7	58.345	0	128.53	3321400	30	50	NbD007233.1;NbE03061217.1;NbE05063492.1;NbD006387.1	NbD007233.1;NbE03061217.1;NbE05063492.1;NbD006387.1	420
14.6449	NaN	NaN	15.3073	15.182	NaN				-1	5	4	2	14.3	12.1	6	69.292	0	196.89	760270	35	19	NbD007258.1;NbE03054419.1	NbD007258.1;NbE03054419.1	422
14.9216	15.3301	14.8884	17.5449	17.9159	18.134				-1	5	5	1	22	22	7.4	36.114	0	56.182	3359600	17	40	NbD007349.1;NbE05065600.1;NbD004400.1;NbE44071167.1;NbD030130.1	NbD007349.1	426
18.2746	18.531	18.3892	17.7	17.7059	17.5175				-1	10	10	2	32.1	32.1	4.3	40.596	0	136.54	7084000	24	84	NbD007457.1;NbD033142.1;NbD005568.1	NbD007457.1	430
19.3178	19.3796	19.2077	18.9378	19.023	18.7951				-1	4	3	1	25.6	21.9	7.3	25.55	0	43.642	11710000	14	43	NbD007460.1	NbD007460.1	431
18.1471	17.8101	17.0549	17.7675	17.8748	17.888				-1	5	5	3	37.4	37.4	26.9	25.595	0	86.475	4067100	15	38	NbE03060319.1;NbD007461.1	NbE03060319.1;NbD007461.1	432
16.5118	16.9839	16.4499	16.7588	16.4305	16.4576				-1	3	3	2	10.1	10.1	7.8	47.993	0	41.306	2198900	19	25	NbD007544.1;NbE44071277.1;NbE03055604.1;NbD010393.1	NbD007544.1;NbE44071277.1	433
18.2496	18.1053	18.4782	18.9808	18.935	19.004				-1	9	6	3	51.3	42.7	13.3	14.826	0	323.31	11027000	10	46	NbD007667.1;NbE03062345.1;NbD022964.1	NbD007667.1;NbE03062345.1;NbD022964.1	438
14.5243	NaN	NaN	14.4149	14.4752	NaN				-1	3	3	2	10.9	10.9	7.6	49.234	0	23.88	316580	30	15	NbD007678.1;NbE44072435.1;NbD020013.1;NbD049945.1;NbD046815.1	NbD007678.1;NbE44072435.1;NbD020013.1;NbD049945.1;NbD046815.1	439
15.4231	NaN	15.7018	15.6147	15.9086	15.7179				-1	5	5	2	13	13	5.9	58.056	0	53.936	1174200	24	24	NbD007705.1	NbD007705.1	442
NaN	NaN	NaN	15.7838	15.9096	15.9457				-1	4	4	3	37.6	37.6	30.1	15.243	0	29.661	839180	7	15	NbD023087.1;NbD007725.1;NbE05063828.1;NbD045001.1;NbD043780.1	NbD023087.1;NbD007725.1;NbE05063828.1;NbD045001.1;NbD043780.1	444
15.6302	15.4217	14.8537	15.8008	16.0828	15.9174				-1	3	3	3	8.1	8.1	8.1	47.512	0	26.781	1827800	20	36	NbE03059012.1;NbD017559.1;NbD007757.1	NbE03059012.1;NbD017559.1;NbD007757.1	449
16.7235	16.7396	16.5754	15.8934	15.7822	15.859				-1	4	4	4	10.4	10.4	10.4	62.329	0	66.528	1453900	32	21	NbD007849.1	NbD007849.1	452
15.8593	15.7798	15.7952	15.4758	15.4566	15.6247				-1	2	2	2	8	8	8	30.659	0	32.46	835990	13	17	NbD007863.1;NbD041071.1;NbE03060149.1	NbD007863.1;NbD041071.1;NbE03060149.1	454
NaN	NaN	NaN	16.3996	16.2838	16.4288				-1	4	4	4	35.8	35.8	35.8	13.768	0	31.785	1892300	4	25	NbD031784.1;NbD028515.1;NbD010643.1;NbD010400.1;NbD007887.1;NbD042990.1	NbD031784.1;NbD028515.1;NbD010643.1;NbD010400.1;NbD007887.1;NbD042990.1	456
17.7021	17.457	18.0131	17.9432	18.1283	18.0826				-1	3	3	3	19.2	19.2	19.2	17	0	52.357	6271000	6	34	NbD007928.1;NbD052997.1;NbD014016.1;NbE03060435.1;NbD025477.1	NbD007928.1;NbD052997.1;NbD014016.1;NbE03060435.1;NbD025477.1	457
15.0028	15.1487	15.2624	16.163	16.108	16.299				-1	6	6	6	10.9	10.9	10.9	87.207	0	69.32	1826400	39	38	NbD019897.1;NbE05065809.1;NbD007938.1	NbD019897.1;NbE05065809.1;NbD007938.1	458
19.2116	19.3175	18.9314	19.0825	19.2276	19.1934				-1	18	18	3	31.8	31.8	5.5	46.841	0	323.31	17990000	24	136	NbD007982.1	NbD007982.1	460
16.5505	16.4014	16.4209	16.096	NaN	15.9049				-1	3	3	3	19	19	19	25.95	0	25.875	1131700	14	23	NbD008015.1;NbD014131.2;NbD014131.1;NbE03058220.1	NbD008015.1;NbD014131.2;NbD014131.1;NbE03058220.1	461
18.3838	18.6567	18.5943	18.6597	18.5999	18.6548				-1	19	7	7	29.1	10.5	10.5	81.632	0	144.51	12509000	41	58	NbD008021.1	NbD008021.1	463
17.5673	NaN	NaN	17.125	17.0704	16.8313				-1	5	5	5	24.1	24.1	24.1	17.818	0	54.975	2405700	9	21	NbD048818.1;NbD035713.1;NbD031743.1;NbD014632.1;NbD009629.1;NbD008042.1;NbD017729.1	NbD048818.1;NbD035713.1;NbD031743.1;NbD014632.1;NbD009629.1;NbD008042.1	466
16.1133	16.1213	16.0456	16.403	16.4052	16.5085				-1	1	1	1	1.7	1.7	1.7	98.939	0	46.148	1361200	38	18	NbE03056943.1;NbE03060505.1;NbD047156.1;NbD017236.1;NbD008073.1	NbE03056943.1;NbE03060505.1;NbD047156.1;NbD017236.1;NbD008073.1	469
16.3638	16.3715	16.435	16.1525	16.0224	16.0311				-1	7	7	7	21.9	21.9	21.9	47.025	0	123.06	2232800	24	47	NbD008153.1	NbD008153.1	472
NaN	15.9234	16.2254	16.1818	16.0837	16.1233				-1	5	5	3	21.9	21.9	14.8	31.649	0	39.82	1133900	18	24	NbD016480.1;NbD008242.1	NbD016480.1;NbD008242.1	475
15.4559	15.1093	15.2197	16.4709	16.4043	16.3642				-1	7	7	7	87.2	87.2	87.2	12.174	0	147.26	1878400	7	40	NbD008344.1;NbE44070642.1;NbD016121.1	NbD008344.1;NbE44070642.1;NbD016121.1	478
14.0283	14.3014	14.5036	14.4682	14.513	14.5132				-1	4	4	2	12.5	12.5	8.6	65.655	0	31.416	491730	34	22	NbD008347.1;NbD016117.1;NbE44072536.1	NbD008347.1;NbD016117.1;NbE44072536.1	479
NaN	NaN	NaN	16.957	16.9872	16.9617				-1	13	8	8	13.1	9.6	9.6	110.42	0	112.72	2721700	54	32	NbD008377.1;NbE05065732.1	NbD008377.1;NbE05065732.1	481
NaN	NaN	15.3149	16.2034	16.6341	16.3247				-1	6	6	6	18.5	18.5	18.5	49.131	0	253.85	1647700	30	26	NbD008379.1	NbD008379.1	482
19.1566	19.0336	19.1882	18.5056	18.576	18.5442				-1	8	8	7	18.9	18.9	16	57.151	0	139.93	5552400	28	39	NbD008528.1;NbD038679.1;NbD025121.1	NbD008528.1;NbD038679.1	494
NaN	NaN	NaN	14.8157	14.6199	14.9718				-1	3	3	2	30.1	30.1	23.3	15.601	0	22.251	324700	6	14	NbD052974.1;NbD030669.1;NbD008640.1	NbD052974.1;NbD030669.1;NbD008640.1	501
NaN	NaN	NaN	16.4629	16.5494	16.5053				-1	7	3	3	24.6	9.5	9.5	42.085	0	161.02	2065600	22	16	NbE05064534.1;NbD008707.1	NbE05064534.1;NbD008707.1	504
19.1413	19.0493	19.2405	18.7413	18.7502	18.7977				-1	8	8	2	34.2	34.2	12.6	29.134	0	128.04	12871000	17	75	NbD008727.1;NbE44070215.1	NbD008727.1;NbE44070215.1	506
NaN	15.4841	15.0071	16.0872	16.3177	16.2811				-1	8	8	3	11.1	11.1	3.6	94.426	0	69.993	1697600	21	41	NbD008756.1	NbD008756.1	507
16.213	16.105	16.8106	15.8293	15.8134	15.74				-1	5	5	2	36.8	36.8	26.9	27.375	0	139.61	1643000	15	26	NbD008781.1	NbD008781.1	510
20.6876	20.5736	20.3284	20.2882	20.4186	20.4579				-1	23	23	2	69.4	69.4	5.3	37.021	0	323.31	53814000	19	192	NbD008810.1;NbD037531.1;NbD022384.1;NbE03060955.1;NbD048296.1	NbD008810.1	515
NaN	NaN	NaN	13.4411	13.8433	14.0333				-1	5	5	3	10.4	10.4	7	62.87	0	31.203	267960	33	13	NbD008898.1;NbE05066640.1;NbE03054262.1	NbD008898.1;NbE05066640.1;NbE03054262.1	518
NaN	15.3832	NaN	15.9503	16.2926	15.9991				-1	4	4	1	6	6	1.4	53.133	0	27.109	1024800	22	18	NbE44073835.1;NbE03056597.1;NbD038369.1;NbD049026.1;NbD009146.1;NbD023960.1;NbE05064296.1;NbD023705.1	NbE44073835.1;NbE03056597.1;NbD038369.1;NbD049026.1;NbD009146.1;NbD023960.1;NbE05064296.1;NbD023705.1	530
NaN	14.3794	14.5989	15.4209	NaN	NaN				-1	7	2	2	46.3	13.8	13.8	24.326	0	14.559	642350	11	17	NbD026420.1;NbD009281.1	NbD026420.1;NbD009281.1	535
NaN	NaN	NaN	15.3925	15.5051	15.4169				-1	4	4	2	6	6	3.8	112.38	0	44.665	542190	62	17	NbD009302.1;NbE05065425.1	NbD009302.1;NbE05065425.1	536
NaN	NaN	NaN	17.3619	17.128	17.2672				-1	13	13	7	44	44	22.8	34.666	0	217.22	3658700	11	51	NbD009316.1	NbD009316.1	537
16.8124	16.5758	16.8177	16.6737	16.8027	16.6227				-1	8	8	5	35.8	35.8	24.7	41.289	0	88.514	2622400	28	59	NbE44071637.1;NbD009383.1	NbE44071637.1;NbD009383.1	542
16.0243	16.0038	16.0735	16.8004	16.7164	16.819				-1	10	2	2	40.1	5.4	5.4	30.627	0	38.572	2641400	16	36	NbD009385.1	NbD009385.1	543
17.6793	17.5696	18.3219	17.9854	17.6265	17.9054				-1	11	11	4	22.1	22.1	10.4	76.399	0	170.35	5227300	32	61	NbE03053857.1;NbD029533.1;NbD009403.1	NbE03053857.1;NbD029533.1;NbD009403.1	545
17.2158	17.2434	16.5398	16.7431	16.1081	15.965				-1	3	3	3	35.1	35.1	35.1	21.097	0	25.303	1426700	13	21	NbD009432.1;NbD025980.1	NbD009432.1	546
15.3689	15.4477	15.9493	15.5308	15.6333	15.5887				-1	5	5	5	21.8	21.8	21.8	47.333	0	123.18	1773900	26	38	NbE03059359.1;NbD009445.1	NbE03059359.1;NbD009445.1	548
21.3398	21.3321	21.0344	21.2678	21.205	21.2775				-1	28	28	7	65.8	65.8	20.8	53.143	0	323.31	94118000	23	315	NbD012482.1;NbD009481.1	NbD012482.1;NbD009481.1	550
14.7714	NaN	NaN	16.9158	16.9965	NaN				-1	3	3	2	15.8	15.8	10.5	19.833	0	33.598	1445900	8	15	NbD034459.1;NbD038231.1;NbD009490.1	NbD034459.1;NbD038231.1;NbD009490.1	553
NaN	NaN	NaN	14.8395	14.8374	15.1126				-1	2	2	1	6.2	6.2	3.2	45.168	0	21.932	353950	20	11	NbD009521.2;NbE03055539.1;NbD009521.1;NbE44074035.1;NbD009701.1	NbD009521.2;NbE03055539.1;NbD009521.1;NbE44074035.1;NbD009701.1	554
NaN	NaN	NaN	14.6049	14.6887	14.6513				-1	20	20	12	34.5	34.5	28.4	35.99	0	323.31	94367000	20	247	NbD009566.1;NbE05064499.1;NbD039690.1	NbD009566.1;NbE05064499.1;NbD039690.1	557
NaN	NaN	NaN	17.0547	16.994	16.9831				-1	10	10	3	27.2	27.2	8	29.715	0	129.69	3169600	16	42	NbD010151.1;NbD009589.1;NbD009588.1	NbD010151.1;NbD009589.1;NbD009588.1	559
15.6609	15.7994	15.6602	15.6819	15.9423	15.8345				-1	6	6	6	26.3	26.3	26.3	42.863	0	55.67	1329200	25	30	NbD009596.1	NbD009596.1	560
16.4681	16.5889	15.9975	15.9284	15.8122	15.7734				-1	3	3	3	18.6	18.6	18.6	28.459	0	32.294	1073500	12	23	NbD009792.1;NbE05066858.1;NbE05064541.1	NbD009792.1;NbE05066858.1;NbE05064541.1	568
16.712	16.1167	16.7913	15.9679	15.9388	NaN				-1	4	4	4	9.8	9.8	9.8	83.043	0	26.831	890490	42	18	NbD009812.1	NbD009812.1	570
NaN	NaN	NaN	17.2012	17.2027	17.2106				-1	3	3	3	10.2	10.2	10.2	32.586	0	26.594	1813500	11	18	NbD009891.1;NbE44071173.1;NbD005399.1;NbE03060874.1	NbD009891.1;NbE44071173.1;NbD005399.1;NbE03060874.1	573
14.7135	15.0008	NaN	15.0325	15.1687	14.7886				-1	6	6	6	14.4	14.4	14.4	49.439	0	50.33	570380	25	22	NbD041831.1;NbD013130.1;NbD009898.1;NbE44071175.1	NbD041831.1;NbD013130.1;NbD009898.1;NbE44071175.1	574
17.8186	17.4993	17.5107	17.0424	17.0278	17.0242				-1	4	4	4	39	39	39	15.053	0	135.79	2304700	7	20	NbD009904.1;NbD005403.1	NbD009904.1;NbD005403.1	575
17.7462	17.7033	17.6714	17.3321	17.4248	17.3476				-1	8	8	1	33.3	33.3	4.6	43.039	0	130.24	4594800	20	53	NbD014155.1;NbD010023.1	NbD014155.1;NbD010023.1	577
16.0528	16.3656	16.046	15.5166	15.9377	15.9451				-1	11	11	11	48.5	48.5	48.5	39.74	0	86.745	2045700	20	52	NbD010074.1;NbD002351.1	NbD010074.1;NbD002351.1	580
16.5088	NaN	15.8332	15.7981	15.9243	15.9113				-1	4	3	3	12.6	10.8	10.8	55.844	0	27.275	1075300	26	18	NbD010108.1	NbD010108.1	581
15.1044	14.7157	15.1721	NaN	NaN	NaN				-1	3	3	3	31.1	31.1	31.1	17.469	0	34.274	436410	7	13	NbE05068286.1;NbD028484.1;NbD010146.1;NbD051875.1;NbE03059962.1;NbD038894.1	NbE05068286.1;NbD028484.1;NbD010146.1;NbD051875.1	582
16.7638	16.6921	16.8137	17.3183	17.4985	17.3425				-1	5	5	5	29.7	29.7	29.7	24.805	0	44.731	2866300	11	33	NbE05062854.1;NbD010207.1;NbE44070534.1;NbD022358.1;NbE05064075.1;NbE44074481.1	NbE05062854.1;NbD010207.1;NbE44070534.1	583
NaN	NaN	NaN	16.9672	17.4091	17.4199				-1	3	3	3	12.7	12.7	12.7	30.121	0	78.803	2279600	12	27	NbD010243.1;NbE05064396.1;NbD007578.1	NbD010243.1;NbE05064396.1	586
17.235	16.9372	16.9115	16.5783	16.6118	16.5095				-1	7	7	2	19	19	3.9	55.135	0	104.54	2513900	26	38	NbD010296.1	NbD010296.1	588
17.1989	17.202	17.5031	17.4932	17.5469	17.2704				-1	7	4	4	73.9	53.2	53.2	12.482	0	118	4541800	5	35	NbD032965.1;NbD010327.1	NbD032965.1;NbD010327.1	589
16.6114	16.8918	16.9626	15.8852	NaN	16.2956				-1	7	7	6	25.3	25.3	18.2	51.603	0	64.418	1733300	26	31	NbE03055876.1;NbD033090.1;NbD010358.1;NbE44074640.1	NbE03055876.1;NbD033090.1;NbD010358.1;NbE44074640.1	590
15.3794	15.508	NaN	15.422	15.6016	15.6172				-1	6	6	6	27.2	27.2	27.2	34.243	0	73.259	991900	15	27	NbD010494.1;NbD016694.1	NbD010494.1;NbD016694.1	595
15.2827	15.1385	15.5713	15.7804	15.5233	15.6065				-1	2	2	2	6.6	6.6	6.6	54.661	0	116.03	911340	24	24	NbD010512.1	NbD010512.1	596
16.7619	16.925	16.7006	16.5447	16.2942	16.2622				-1	6	4	4	29.6	20.4	20.4	37.658	0	47.948	1607100	19	24	NbD010574.1;NbE05067333.1;NbD015710.1	NbD010574.1;NbE05067333.1;NbD015710.1	600
NaN	NaN	NaN	14.4487	14.4043	14.361				-1	1	1	1	4.1	4.1	4.1	42.638	0.00053763	10.455	273270	23	11	NbD010593.1;NbD010593.2	NbD010593.1;NbD010593.2	601
18.6487	18.4479	18.7506	18.5998	18.31	18.1822				-1	5	2	2	11.8	4.5	4.5	49.745	0	58.561	5986900	23	19	NbD019274.1;NbD023165.1;NbD010647.1;NbE03055415.1;NbD034666.1;NbD014003.1;NbD035848.1;NbD023141.1;NbD041465.1;NbD031389.1;NbD005893.1	NbD019274.1;NbD023165.1;NbD010647.1;NbE03055415.1;NbD034666.1;NbD014003.1;NbD035848.1;NbD023141.1	604
17.5666	17.2703	17.7621	17.9579	17.9932	17.8805				-1	4	4	3	12.6	12.6	8.1	47.811	0	68.526	4029700	22	29	NbD010775.1	NbD010775.1	610
16.235	16.252	NaN	16.9537	16.8125	16.8193				-1	1	1	1	4.7	4.7	4.7	34.078	0	35.393	1022800	17	12	NbD010787.1;NbD023946.1	NbD010787.1;NbD023946.1	611
16.8561	NaN	NaN	18.2053	18.456	18.1797				-1	9	4	4	54.8	32.2	32.2	16.389	0	167.47	5707800	10	35	NbD019774.1;NbD010796.1	NbD019774.1;NbD010796.1	612
17.4496	17.2999	16.8705	16.7734	16.691	16.8466				-1	5	5	3	39	39	18.5	34.254	0	188.78	2577700	16	45	NbD010954.1;NbE05067852.1	NbD010954.1;NbE05067852.1	617
NaN	NaN	NaN	15.8069	15.7045	15.6851				-1	2	2	2	14.7	14.7	14.7	10.809	0	16.58	900080	4	15	NbD038435.1;NbD010962.1	NbD038435.1;NbD010962.1	618
18.3942	18.1255	18.5307	18.2693	18.3019	18.2863				-1	18	15	15	34.2	28.8	28.8	64.604	0	211.7	9437900	35	102	NbD010968.1;NbD044203.1;REV__NbD015067.1	NbD010968.1;NbD044203.1	620
15.4703	15.4564	NaN	15.9653	15.7677	15.9652				-1	3	3	3	5.1	5.1	5.1	94.826	0	31.083	1080500	41	23	NbD010990.1;NbD041092.1	NbD010990.1;NbD041092.1	622
17.5924	17.5054	17.7236	17.8851	17.8122	17.7878				-1	14	14	14	49.7	49.7	49.7	41.235	0	323.31	8808000	21	112	NbD011005.1;NbD037366.1	NbD011005.1;NbD037366.1	623
16.9643	16.7474	16.7419	16.0232	16.0372	15.9366				-1	4	4	4	28.1	28.1	28.1	30.093	0	106.86	2265000	13	41	NbD011066.1;NbD049922.1	NbD011066.1;NbD049922.1	626
16.9074	16.8792	17.1598	16.9884	16.9735	17.1138				-1	3	3	3	40.7	40.7	40.7	14.466	0	80.874	2569500	7	26	NbD037117.1;NbD011186.1	NbD037117.1;NbD011186.1	632
18.3582	18.1344	18.6863	18.6915	18.716	18.615				-1	10	10	3	29.9	29.9	16.7	25.018	0	128.83	14282000	11	65	NbD011194.1;NbD021567.1;NbD041935.1	NbD011194.1;NbD021567.1;NbD041935.1	634
15.7397	15.6826	15.913	15.8469	16.009	NaN				-1	6	6	2	25.2	25.2	5	30.488	0	74.256	1181100	17	30	NbD011204.1;NbD029765.1;NbD002088.1	NbD011204.1;NbD029765.1;NbD002088.1	636
17.6484	17.2026	17.741	17.7678	17.7774	17.7942				-1	4	4	3	12.9	12.9	12.9	40.05	0	122.59	6923100	19	81	NbE05062949.1;NbE03057461.1;NbD050123.1;NbD011215.1;NbD029391.1	NbE05062949.1;NbE03057461.1;NbD050123.1;NbD011215.1	638
18.0281	18.152	18.399	17.9957	18.1776	18.1062				-1	7	7	2	16.2	16.2	6.3	48.01	0	128.28	8155400	18	60	NbD011249.1	NbD011249.1	639
NaN	18.1175	19.0657	18.3513	NaN	17.4663				-1	23	2	2	50	8.1	8.1	42.753	0	26.596	4930200	21	17	NbD011459.1;NbE44069821.1	NbD011459.1;NbE44069821.1	648
15.6712	15.6562	NaN	16.1777	16.1813	16.0471				-1	3	3	3	14.1	14.1	14.1	32.427	0	73.549	1400100	17	19	NbD037094.1;NbD011495.1	NbD037094.1;NbD011495.1	650
15.4866	15.5571	NaN	15.7409	15.9899	15.9483				-1	7	7	7	15.2	15.2	15.2	34.995	0	73.107	1262300	12	32	NbD011498.1;NbE44070999.1;NbD050339.1;NbE44072495.1	NbD011498.1;NbE44070999.1;NbD050339.1;NbE44072495.1	651
15.2245	15.4247	15.5109	15.7089	15.9662	NaN				-1	4	4	4	16.6	16.6	16.6	27.298	0	33.189	1081100	13	23	NbD011515.1;NbD045364.1;NbE03055103.1	NbD011515.1;NbD045364.1;NbE03055103.1	652
NaN	NaN	NaN	14.1452	14.6148	14.3605				-1	1	1	1	2.5	2.5	2.5	53.997	0	12.772	252660	24	10	NbD011531.1	NbD011531.1	655
NaN	15.4738	NaN	15.5434	15.6001	15.5729				-1	4	4	4	8.1	8.1	8.1	97.77	0	43.713	761120	47	18	NbE03060987.1;NbD011550.1	NbE03060987.1;NbD011550.1	656
NaN	NaN	16.5543	NaN	16.1485	16.2491				-1	7	5	5	16.5	13.7	13.7	42.909	0	49.962	1291500	19	25	NbD011638.1;NbD027256.1	NbD011638.1;NbD027256.1	663
NaN	16.3418	NaN	16.7458	16.789	16.6576				-1	3	3	2	6	6	3.1	98.121	0	28.382	1608400	55	19	NbD011652.1;NbD017942.1;NbE03055451.1	NbD011652.1;NbD017942.1	665
17.5323	17.4432	17.4444	17.2644	17.2317	17.2974				-1	8	8	7	23	23	20.2	39.06	0	195.94	6054900	17	68	NbD011698.1	NbD011698.1	669
16.2001	16.019	15.5811	16.5432	16.4359	16.441				-1	11	11	11	20.1	20.1	20.1	87.773	0	105.48	2285500	42	48	NbD011778.1;NbD043052.1;NbE03058543.1	NbD011778.1;NbD043052.1;NbE03058543.1	672
NaN	NaN	NaN	17.859	17.9833	18.0142				-1	8	8	8	33.1	33.1	33.1	49.45	0	270.81	3694600	22	40	NbD011790.1;NbD045030.1	NbD011790.1	673
NaN	NaN	NaN	16.5594	16.5476	16.3901				-1	6	3	3	25.5	18.5	18.5	30.037	0	44.473	2390200	15	34	NbD011824.1;NbD051455.1	NbD011824.1;NbD051455.1	675
NaN	NaN	NaN	16.3575	16.4024	16.331				-1	3	3	3	36.3	36.3	36.3	13.82	0	35.105	1273400	4	19	NbD039705.1;NbD011842.1	NbD039705.1;NbD011842.1	678
19.3885	19.5321	19.155	18.9144	18.814	18.9156				-1	22	22	8	47.4	47.4	22.8	56.819	0	290.81	18522000	24	133	NbD011866.1	NbD011866.1	679
17.6236	17.5564	17.7736	17.817	17.786	17.7389				-1	4	4	4	24.7	24.7	24.7	30.788	0	57.864	6604500	16	55	NbD011985.1	NbD011985.1	680
16.6296	16.7596	16.185	16.5777	16.7636	16.926				-1	8	4	0	33.6	19.4	0	33.187	0	83.206	1657000	17	22	NbD011993.1	NbD011993.1	681
15.0791	NaN	NaN	15.0458	15.3998	15.3734				-1	6	6	6	18	18	18	47.175	0	51.67	1098900	24	30	NbD012001.1;NbD047069.1;NbD027673.1	NbD012001.1;NbD047069.1;NbD027673.1	682
17.3812	17.3489	17.2057	NaN	16.568	16.762				-1	4	4	4	15.7	15.7	15.7	30.365	0	36.492	1582700	15	23	NbD012148.1;NbD020527.1	NbD012148.1;NbD020527.1	689
19.2028	19.122	18.3776	19.4452	19.1907	19.1991				-1	9	4	4	24.5	11	11	47.727	0	82.197	7312900	18	36	NbD012265.1;NbE03054480.1;NbD023708.1	NbD012265.1;NbE03054480.1;NbD023708.1	695
20.5869	20.5866	20.518	20.1279	20.0576	20.1722				-1	13	13	7	40.3	40.3	20.2	51.778	0	323.31	20074000	30	84	NbD012284.1;NbD021385.1;NbD014990.1;NbE03054611.1;NbD026379.1	NbD012284.1	696
17.6721	17.7056	17.6646	NaN	17.2185	17.0823				-1	5	5	1	30.6	30.6	8.5	29.238	0	39.95	1988500	13	23	NbD012332.1	NbD012332.1	700
14.8388	14.5947	14.5906	14.4353	14.2315	14.168				-1	2	2	2	14.2	14.2	14.2	26.234	0	15.973	321590	16	13	NbD012335.1;NbE44071746.1;NbD020124.1	NbD012335.1;NbE44071746.1;NbD020124.1	701
16.1379	16.2412	16.4757	15.7562	15.8399	15.71				-1	6	6	2	20.9	20.9	8.5	42.953	0	74.456	1413500	21	32	NbD012395.1;NbE44070424.1	NbD012395.1	703
NaN	NaN	NaN	16.2296	16.1789	16.2002				-1	6	6	6	18.3	18.3	18.3	51.188	0	44.397	1438200	28	29	NbD039165.1;NbD012404.1	NbD039165.1;NbD012404.1	704
16.5719	16.4699	16.6552	15.9715	16.0924	15.9121				-1	4	4	4	23.2	23.2	23.2	24.668	0	90.428	1828900	10	32	NbD012410.1;NbE03059259.1;NbD022339.1;NbE05067756.1	NbD012410.1;NbE03059259.1;NbD022339.1;NbE05067756.1	705
16.0392	15.8385	16.1914	16.2501	16.3595	16.2704				-1	3	3	3	11	11	11	46.042	0	35.612	1363500	28	21	NbD012465.1;NbD026297.1;NbD025456.1	NbD012465.1;NbD026297.1;NbD025456.1	709
NaN	NaN	14.8989	17.0784	17.1146	16.9999				-1	8	8	2	34.1	34.1	13.3	24.673	0	142.42	3657400	7	45	NbD012644.1	NbD012644.1	717
16.3868	16.1077	16.2352	NaN	15.9811	NaN				-1	5	5	0	45.4	45.4	0	20.37	0	33.972	1316800	11	17	NbD012820.1;NbE03054988.1	NbD012820.1;NbE03054988.1	726
19.7616	19.3315	19.6076	18.8791	18.977	18.8535				-1	32	3	3	47.6	11.3	11.3	52.672	0	99.498	10460000	23	41	NbD012851.1;NbD052725.1;NbD015971.1;NbE03059648.1	NbD012851.1;NbD052725.1	727
NaN	NaN	NaN	15.9943	16.2733	16.1104				-1	6	6	3	16.6	16.6	11.1	47.98	0	61.552	1045000	23	21	NbD012857.1;NbE05064745.1	NbD012857.1;NbE05064745.1	728
15.7648	15.9056	15.7603	15.7981	15.9296	15.9555				-1	6	6	1	22.1	22.1	4	45.921	0	77.84	2026500	23	40	NbD012883.1	NbD012883.1	730
15.7847	16.0314	16.4301	16.0366	16.0357	NaN				-1	4	4	4	7.1	7.1	7.1	59.528	0	34.532	1093500	28	23	NbD012914.2;NbD012914.1;NbE05065274.1;NbE05065273.1;NbD036539.1	NbD012914.2;NbD012914.1;NbE05065274.1;NbE05065273.1	733
16.7917	16.8202	16.4252	16.4102	NaN	16.1476				-1	3	3	3	12.5	12.5	12.5	33.701	0	67.219	1628800	14	24	NbD012946.1	NbD012946.1	735
16.0482	15.9238	16.1599	15.9631	15.8576	16.0114				-1	9	9	8	14.6	14.6	9.9	69.683	0	139.49	2095800	37	45	NbD012999.1;NbE05064976.1;NbD002058.1;NbE44072059.1	NbD012999.1;NbE05064976.1;NbD002058.1;NbE44072059.1	738
15.5181	15.4124	15.3638	NaN	NaN	NaN				-1	2	2	2	13.6	13.6	13.6	36.318	0	42.206	352230	18	12	NbD034434.1;NbD034433.1;NbD013009.1;NbD013008.1	NbD034434.1;NbD034433.1;NbD013009.1;NbD013008.1	739
18.6947	18.5172	18.6183	19.3364	19.3624	19.319				-1	19	19	10	50.4	50.4	31.2	42.532	0	323.31	20697000	23	121	NbD013237.1	NbD013237.1	746
18.4794	18.4351	18.1678	18.4388	18.2483	18.1799				-1	8	8	6	29.7	29.7	22.9	32.317	0	178.86	6401600	13	60	NbE05067404.1;NbE44073898.1;NbD013238.1	NbE05067404.1;NbE44073898.1;NbD013238.1	747
15.3537	15.3304	15.331	15.7224	15.7425	15.8085				-1	4	4	4	18	18	18	37.95	0	54.036	1156500	21	29	NbD013241.1	NbD013241.1	748
17.1584	16.9028	16.6035	16.6902	NaN	16.4422				-1	8	4	4	22.6	12.9	12.9	63.287	0	71.038	1901600	37	25	NbD013269.1	NbD013269.1	749
17.1722	17.0663	17.1983	16.6303	16.7105	16.6731				-1	5	5	5	12.5	12.5	12.5	42.495	0	86.668	3026200	17	36	NbD030112.1;NbD013274.1	NbD030112.1;NbD013274.1	750
NaN	15.9821	15.8827	16.18	16.115	16.1724				-1	6	6	3	41.8	41.8	19.7	13.546	0	64.638	1316900	9	24	NbD013286.1	NbD013286.1	751
NaN	NaN	NaN	15.9243	15.9357	15.9165				-1	1	1	1	2.2	2.2	2.2	61.672	0	55.552	571210	21	11	NbD013345.1;NbE03059674.1	NbD013345.1;NbE03059674.1	754
19.095	19.3857	18.4596	20.2228	20.1696	19.9843				-1	24	5	0	54.2	13.1	0	46.93	0	188.57	14362000	23	42	NbD015306.1;NbD015305.1;NbD014350.1;NbD013348.1	NbD015306.1;NbD015305.1;NbD014350.1;NbD013348.1	755
18.6809	18.9156	19.1206	18.8497	18.9853	18.9184				-1	24	24	23	71.9	71.9	67.6	54.179	0	323.31	19341000	25	129	NbD013365.1;NbD021332.1;NbD006622.1;NbD011800.1;NbE44069573.1;NbE03060395.1;NbE05064852.1;NbD005629.1	NbD013365.1;NbD021332.1;NbD006622.1;NbD011800.1;NbE44069573.1;NbE03060395.1	756
16.4013	16.3461	NaN	15.4865	16.1902	15.7036				-1	6	6	6	13.4	13.4	13.4	51.036	0	141.1	1471400	21	27	NbD013463.1;NbE03054310.1;NbD009048.1	NbD013463.1;NbE03054310.1;NbD009048.1	760
18.3848	18.4511	17.1743	19.1455	19.0498	19.2219				-1	8	8	8	12.2	12.2	12.2	97.918	0	138.87	11895000	46	66	NbD013513.1;NbE03055932.1;NbD053068.1;NbD000974.1	NbD013513.1;NbE03055932.1;NbD053068.1	761
NaN	NaN	NaN	16.6902	16.475	16.557				-1	18	18	10	22	22	15.4	142.31	0	269.03	3725200	64	73	NbD013541.1;NbE03057304.1	NbD013541.1;NbE03057304.1	762
16.3617	16.353	15.8707	15.6944	15.6405	15.7303				-1	5	5	5	7.1	7.1	7.1	64.91	0	51.651	1275200	30	27	NbE03059799.1;NbD025460.1;NbE44073179.1;NbD013545.1	NbE03059799.1;NbD025460.1;NbE44073179.1;NbD013545.1	763
16.1857	NaN	16.5601	16.6024	16.6708	16.6754				-1	5	5	1	25.4	25.4	12.9	28.056	0	54.417	2453500	13	34	NbD013742.1	NbD013742.1	771
NaN	15.6333	14.9973	15.4522	15.5599	15.6046				-1	6	6	1	25.6	25.6	4.8	39.076	0	50.048	906950	14	25	NbD013760.1;NbE05067527.1;NbE03059840.1	NbD013760.1;NbE05067527.1;NbE03059840.1	773
20.9069	21.0054	20.892	21.2241	21.2198	21.2418				-1	37	37	7	40.1	40.1	6.8	93.956	0	323.31	118210000	43	398	NbE05068830.1;NbD013853.1;NbE44073635.1;NbD014347.1;NbE05067878.1	NbE05068830.1;NbD013853.1;NbE44073635.1;NbD014347.1	774
16.6918	16.9588	16.6121	17.4545	17.2713	17.359				-1	15	15	15	33.6	33.6	33.6	45.918	0	323.31	6906300	25	105	NbD013858.1;NbD002977.1	NbD013858.1	775
17.3847	17.2765	NaN	16.6661	NaN	NaN				-1	3	3	2	7.2	7.2	7.2	28.072	0	51.501	1255200	8	13	NbD024360.1;NbD013935.1;NbD013934.1;NbD024361.1;NbE05066968.1	NbD024360.1;NbD013935.1;NbD013934.1	779
17.9373	17.801	18.1909	17.553	17.5512	17.5375				-1	3	3	3	9.1	9.1	9.1	40.095	0	68.401	3747300	20	19	NbD047959.1;NbD013954.1	NbD047959.1;NbD013954.1	780
NaN	NaN	15.9672	16.116	16.1574	16.1028				-1	3	3	3	12.2	12.2	12.2	60.457	0	72.552	1586400	38	26	NbD013967.1;NbD052931.1	NbD013967.1;NbD052931.1	782
NaN	NaN	NaN	16.1259	16.1826	16.2035				-1	10	10	3	17.7	17.7	6	109.32	0	72.929	1630000	58	29	NbD014013.1	NbD014013.1	786
17.7007	17.5191	18.3102	18.5388	18.5054	18.4764				-1	5	4	3	24	18.3	11.8	26.171	0	113.31	8495800	12	43	NbD014102.1;NbE03061157.1;NbD006207.1;NbE44072515.1	NbD014102.1;NbE03061157.1;NbD006207.1;NbE44072515.1	790
19.1909	19.3472	19.1948	19.4367	19.4151	19.5203				-1	20	20	5	30.6	30.6	10.4	81.334	0	323.31	26608000	42	174	NbD014128.1	NbD014128.1	792
13.34	NaN	NaN	13.9612	13.8894	13.8711				-1	1	1	1	2.3	2.3	2.3	77.765	0.0014778	8.2073	280990	32	14	NbD014147.1;NbD042139.1	NbD014147.1;NbD042139.1	794
16.1957	16.1931	16.2152	NaN	NaN	NaN				-1	2	2	2	6.3	6.3	6.3	32.295	0	16.381	401310	17	10	NbD014174.1	NbD014174.1	796
NaN	NaN	NaN	14.4299	14.5496	14.5487				-1	2	2	2	4.7	4.7	4.7	74.628	0	25.757	212720	33	10	NbD043579.1;NbD014199.1	NbD043579.1;NbD014199.1	799
17.6213	NaN	17.95	17.9892	18.5635	18.0292				-1	3	3	3	8.5	8.5	8.5	45.087	0	76.871	3840700	16	23	NbE03053595.1;NbD043581.1;NbD014202.1	NbE03053595.1;NbD043581.1;NbD014202.1	800
18.6876	18.757	18.5026	18.6723	18.6142	18.7238				-1	10	10	7	22.9	22.9	14.3	46.643	0	323.31	14416000	19	106	NbD014257.1;NbD022590.1;NbE03059756.1	NbD014257.1;NbD022590.1;NbE03059756.1	805
16.916	16.678	17.3667	17.178	16.8659	16.9197				-1	9	3	3	54.1	23.8	23.8	18.044	0	22.1	3065600	10	25	NbD014322.1	NbD014322.1	810
NaN	NaN	NaN	17.6239	17.6502	17.8235				-1	27	5	0	56.6	18.8	0	44.732	0	257.01	3683100	23	26	NbD014326.1	NbD014326.1	811
NaN	NaN	NaN	14.6072	14.5199	14.5253				-1	14	4	4	12.5	5.1	5.1	151.98	0	31.073	383860	66	13	NbD014331.1;NbE03055041.1	NbD014331.1;NbE03055041.1	812
16.4138	NaN	16.4943	17.2483	NaN	NaN				-1	5	3	3	27.6	24.9	24.9	17.392	0	38.068	871600	12	14	NbE03054587.1;NbE44069955.1;NbD014335.1;NbD028293.1	NbE03054587.1;NbE44069955.1;NbD014335.1;NbD028293.1	813
15.837	16.1757	15.9262	15.8777	15.891	15.9746				-1	7	7	6	14.2	14.2	12.5	75.858	0	47.773	1668300	41	37	NbD014565.1;NbD001761.1	NbD014565.1;NbD001761.1	818
16.9029	17.0486	17.004	17.6368	17.6147	17.6035				-1	17	17	8	17.9	17.9	9.2	88.059	0	200.35	11768000	41	119	NbD014644.1;NbD045772.1;NbD017469.1;NbD029986.1;NbD016286.1;NbD039609.1;NbD011401.1	NbD014644.1;NbD045772.1;NbD017469.1;NbD029986.1;NbD016286.1;NbD039609.1	824
13.9764	13.9054	NaN	NaN	14.0823	NaN				-1	3	1	1	25.6	10.3	10.3	16.867	0	19.203	141730	8	11	NbE03062390.1;NbE44074126.1;NbE05066660.1;NbD014807.1;NbE05066259.1;NbD026492.1	NbE03062390.1;NbE44074126.1;NbE05066660.1;NbD014807.1;NbE05066259.1;NbD026492.1	831
20.383	20.4455	20.6483	20.4628	20.4072	20.3469				-1	26	26	11	70.3	70.3	30.1	35.919	0	323.31	52971000	21	243	NbD014817.1	NbD014817.1	832
NaN	NaN	NaN	15.8036	15.8734	15.7394				-1	5	2	1	22.3	11.2	11.2	23.028	0	43.533	538220	11	9	NbD014898.1;NbD031467.1;NbD024794.1;NbD000097.1	NbD014898.1;NbD031467.1;NbD024794.1	837
15.2773	14.7983	NaN	15.6932	16.0138	15.8892				-1	5	5	2	30	30	6.3	25.721	0	40.9	1483400	7	28	NbD014899.1;NbE05064693.1	NbD014899.1;NbE05064693.1	838
16.9863	17.2394	17.0065	17.1366	NaN	16.998				-1	3	3	3	10.3	10.3	10.3	45.026	0	28.995	1728600	25	15	NbD014907.1;NbD033327.1	NbD014907.1;NbD033327.1	840
17.7634	17.6231	16.9616	17.2965	16.8892	16.9636				-1	6	6	6	29.3	29.3	29.3	19.001	0	144.32	2591700	10	50	NbD014996.1;NbE05067080.1;NbE44071340.1	NbD014996.1;NbE05067080.1;NbE44071340.1	844
NaN	NaN	NaN	14.5939	14.8736	14.7958				-1	2	2	2	6.1	6.1	6.1	42.925	0	41.161	358110	17	11	NbD022167.1;NbD015073.1	NbD022167.1;NbD015073.1	845
17.9803	17.9732	18.267	18.0742	18.085	18.1216				-1	6	6	6	24.5	24.5	24.5	40.881	0	226.99	5939400	20	48	NbD015087.1;NbE05068498.1;NbD004456.1	NbD015087.1;NbE05068498.1;NbD004456.1	846
19.0538	19.1339	19.2531	19.3125	19.4141	19.3912				-1	9	6	5	45.9	40.8	33.3	28.797	0	59.412	12447000	15	34	NbD045776.1;NbD015146.1	NbD045776.1;NbD015146.1	848
16.642	16.2144	16.5717	15.994	15.9032	NaN				-1	3	3	3	8	8	8	48.646	0	43.505	1043300	20	23	NbE03055740.1;NbD015255.1	NbE03055740.1;NbD015255.1	851
18.5827	18.4835	18.3938	16.7838	16.9925	17.3207				-1	10	10	0	62.4	62.4	0	20.27	0	231.3	4055200	10	46	NbD015262.1;NbD015261.1;NbE03059928.1;NbE44074020.1	NbD015262.1;NbD015261.1	852
16.7081	16.5825	15.5549	17.1975	17.3313	17.3097				-1	34	4	4	38.1	4.6	4.6	94.431	0	61.225	4373400	43	58	NbD015310.1	NbD015310.1	855
NaN	NaN	15.0273	NaN	15.1019	15.3714				-1	3	3	3	20.9	20.9	20.9	34.478	0	45.445	652580	13	16	NbE03061318.1;NbD039428.1;NbD015371.1	NbE03061318.1;NbD039428.1;NbD015371.1	858
19.051	19.2672	18.8195	18.2878	18.5602	18.5219				-1	14	14	2	47.1	47.1	12.3	37.613	0	271.26	13078000	19	110	NbD015375.1	NbD015375.1	859
NaN	NaN	NaN	15.0947	15.1295	15.1302				-1	8	8	4	10.2	10.2	5.6	167.16	0	112.27	1113100	74	29	NbE03060284.1;NbD015387.1	NbE03060284.1;NbD015387.1	862
20.1523	20.0026	20.0398	20.3774	20.41	20.403				-1	18	18	6	47.7	47.7	10.9	37.302	0	323.31	67165000	17	183	NbD015455.1	NbD015455.1	865
16.4002	15.9376	NaN	16.1183	16.265	16.3911				-1	6	6	1	17	17	3.4	58.222	0	53.299	1605900	28	26	NbD015467.1	NbD015467.1	866
18.6277	18.5293	18.6465	22.0234	22.0222	22.0522				-1	66	66	18	67.3	67.3	19.6	107.79	0	323.31	143900000	57	480	NbD015511.1	NbD015511.1	869
17.56	17.155	17.6345	16.8539	NaN	17.1654				-1	3	3	3	13.7	13.7	13.7	30.474	0	57.29	2516900	19	18	NbE05068538.1;NbE05067353.1;NbD015518.1;NbD033721.1	NbE05068538.1;NbE05067353.1;NbD015518.1;NbD033721.1	870
17.4523	17.4568	17.4707	17.7063	17.7772	17.5765				-1	3	3	3	12.8	12.8	12.8	41.21	0	85.674	2155800	14	16	NbD015558.1	NbD015558.1	873
17.5224	17.6174	17.6707	17.5048	17.6521	NaN				-1	3	3	3	11.2	11.2	11.2	38.08	0	34.36	2387000	17	16	NbD015663.1;NbD049428.1	NbD015663.1;NbD049428.1	881
14.3348	NaN	NaN	14.9329	NaN	14.8842				-1	3	2	2	6.3	4.3	4.3	85.541	0	27.514	346890	57	11	NbE05065490.1;NbD015731.1;NbE03058381.1	NbE05065490.1;NbD015731.1	882
NaN	NaN	NaN	14.9925	15.0937	15.1943				-1	3	3	2	9.1	9.1	5.6	50.666	0	55.189	397260	20	12	NbD036688.1;NbD015746.1	NbD036688.1;NbD015746.1	883
NaN	NaN	NaN	14.4057	14.3957	14.3664				-1	3	3	3	26.1	26.1	26.1	27.649	0	43.87	198810	18	11	NbD015783.1	NbD015783.1	890
NaN	NaN	NaN	15.348	15.271	15.2858				-1	7	7	3	9	9	3.9	159.6	0	120.94	911430	80	25	NbD015816.1;NbE44073706.1	NbD015816.1;NbE44073706.1	891
NaN	NaN	14.7417	15.538	15.6793	15.6147				-1	4	4	3	5.5	5.5	4.3	104.45	0	77.163	1119200	32	22	NbE03053434.1;NbD016041.1;NbE05064043.1;NbD049742.1;NbD038446.1	NbE03053434.1;NbD016041.1;NbE05064043.1;NbD049742.1	896
15.6514	NaN	NaN	15.5522	15.4672	NaN				-1	2	2	2	12.9	12.9	12.9	41.599	0	60.619	750610	19	14	NbE03054516.1;NbD016140.1	NbE03054516.1;NbD016140.1	900
15.4876	15.4644	15.1719	18.6626	18.6914	18.721				-1	12	12	12	25.3	25.3	25.3	54.035	0	261.54	12390000	24	67	NbD016173.1;NbD024435.1	NbD016173.1;NbD024435.1	902
20.0378	20.1421	20.017	19.9735	20.1467	20.1791				-1	7	7	7	13.7	13.7	13.7	61.782	0	247.7	14269000	28	50	NbD016309.1;NbE05065667.1;NbD021627.1	NbD016309.1;NbE05065667.1;NbD021627.1	905
17.653	17.9828	17.8308	17.2807	17.2162	17.2245				-1	18	18	4	42.1	42.1	7.9	44.236	0	210.86	8029700	25	103	NbD016339.1	NbD016339.1	907
16.7791	16.9828	15.9624	16.0412	16.1045	16.105				-1	5	5	5	32.3	32.3	32.3	29.2	0	46.733	1488500	14	27	NbD016367.1;NbE03059138.1;NbE03056077.1;NbD033234.1	NbD016367.1;NbE03059138.1	910
15.5924	15.6072	15.6123	17.3179	17.4518	17.4238				-1	12	12	7	18.4	18.4	6.3	59.589	0	323.31	4920900	26	73	NbD016376.1	NbD016376.1	911
16.3148	16.1971	16.7244	18.1182	18.1238	18.1376				-1	5	2	2	26.7	17.6	17.6	25.028	0	47.586	4121300	14	23	NbE05063272.1;NbD016395.1	NbE05063272.1;NbD016395.1	913
16.3331	16.0623	16.5396	16.1967	16.1577	16.0952				-1	2	2	2	30.4	30.4	30.4	14.842	0	28.477	1836500	9	27	NbD046126.1;NbD040199.1;NbD016474.1;NbE05064467.1;NbE44073196.1	NbD046126.1;NbD040199.1;NbD016474.1;NbE05064467.1;NbE44073196.1	918
17.711	NaN	17.618	16.9665	16.9607	16.8966				-1	2	2	2	10.3	10.3	10.3	38.441	0	36.214	1672200	21	17	NbD016523.1;NbD026345.1	NbD016523.1;NbD026345.1	920
13.9274	NaN	13.9506	14.5613	14.5513	14.4398				-1	9	2	2	15.7	4.1	4.1	76.477	0	22.071	367400	32	14	NbD016533.1;NbD006996.1;NbE03055581.1	NbD016533.1;NbD006996.1;NbE03055581.1	921
NaN	NaN	NaN	15.6174	15.7262	15.6087				-1	5	5	5	33.3	33.3	33.3	24.173	0	92.886	1415900	9	26	NbD016565.1;NbE03058186.1;NbD051974.1;NbD018483.1;NbD015852.1;NbD006632.1;NbE44069586.1	NbD016565.1;NbE03058186.1;NbD051974.1;NbD018483.1;NbD015852.1;NbD006632.1;NbE44069586.1	923
NaN	15.7495	15.8134	15.8354	15.9071	15.7815				-1	34	8	8	43.9	11	11	69.06	0	70.973	1664100	32	34	NbD016708.1	NbD016708.1	928
NaN	NaN	NaN	14.8464	15.0497	14.9909				-1	3	3	3	11.2	11.2	11.2	67.692	0	27.728	304320	35	11	NbE44070508.1;NbD048901.1;NbD016824.1;NbE44071777.1	NbE44070508.1;NbD048901.1;NbD016824.1	930
15.3371	15.1624	15.2989	16.1255	NaN	16.073				-1	4	2	2	15	8.6	8.6	35.935	0	36.779	911010	17	16	NbD016828.1	NbD016828.1	931
NaN	NaN	NaN	17.3041	17.3153	17.4767				-1	7	7	1	37.3	37.3	10.7	16.345	0	104.55	3695400	6	30	NbD043694.1;NbD041460.1;NbD016868.1;NbD048288.1;NbD029946.1	NbD043694.1;NbD041460.1;NbD016868.1;NbD048288.1;NbD029946.1	933
19.6002	19.6186	19.5693	19.8132	19.5896	19.6945				-1	11	11	11	22.2	22.2	22.2	55.404	0	323.31	17460000	23	85	NbD016904.1;NbD037497.1;NbE44071666.1;NbE03056567.1;NbE03056568.1	NbD016904.1;NbD037497.1;NbE44071666.1;NbE03056567.1	937
NaN	NaN	NaN	17.7747	17.6751	17.7232				-1	11	11	2	45.6	45.6	10.7	23.584	0	107.89	5203200	11	56	NbD016943.1;NbD031589.1;NbD037388.1;NbD036571.1;NbD023451.1;NbD027710.1	NbD016943.1;NbD031589.1	941
17.9098	17.679	17.4817	NaN	17.3944	17.2174				-1	6	4	4	15.9	13.4	13.4	65.708	0	78.34	2224400	30	23	NbD035904.1;NbD017030.1	NbD035904.1;NbD017030.1	944
16.1803	16.1315	16.5133	17.1348	17.1652	17.065				-1	6	6	0	19.6	19.6	0	43.323	0	133.59	3528800	26	42	NbD017043.1;NbD035485.1	NbD017043.1;NbD035485.1	945
NaN	NaN	NaN	15.9916	15.8353	15.8979				-1	8	8	4	34.2	34.2	16.2	28.169	0	84.576	1322600	14	34	NbD017089.1;NbE03056336.1;NbD007127.1;NbD005240.1;NbD037627.1;NbD033219.1	NbD017089.1;NbE03056336.1;NbD007127.1;NbD005240.1;NbD037627.1;NbD033219.1	947
15.999	15.7651	15.6732	16.4615	16.5939	16.4658				-1	9	9	9	13.2	13.2	13.2	120.32	0	166.72	2352600	36	49	NbE03058426.1;NbD017133.1	NbE03058426.1;NbD017133.1	950
17.0013	16.9842	17.2917	17.5981	17.1822	NaN				-1	4	4	4	16.9	16.9	16.9	33.982	0	31.856	2198600	17	28	NbD020950.1;NbD017314.1;NbD015052.1;NbD012226.1	NbD020950.1;NbD017314.1	957
18.7261	18.7266	18.2172	19.8162	19.6758	19.7399				-1	22	22	6	49.9	49.9	13.1	58.558	0	323.31	26352000	32	172	NbD017355.1	NbD017355.1	961
NaN	NaN	NaN	14.5605	14.6464	14.736				-1	2	2	2	12.1	12.1	12.1	25.265	0	24.622	384520	13	16	NbD017724.1;NbD017502.1	NbD017724.1;NbD017502.1	967
16.4015	16.1083	NaN	16.3469	16.2434	16.2476				-1	2	2	2	14.1	14.1	14.1	19.768	0	41.697	953180	9	14	NbE44073791.1;NbD019111.1;NbE44072124.1;NbE03055236.1;NbD017642.1;NbE05065656.1;NbD051218.1	NbE44073791.1;NbD019111.1;NbE44072124.1;NbE03055236.1;NbD017642.1;NbE05065656.1;NbD051218.1	971
18.8205	19.0115	NaN	18.0726	18.1005	18.0264				-1	3	3	1	20.1	20.1	9.5	29.204	0	54.8	4331900	8	23	NbD017696.1;NbD047786.1;NbE03059616.1	NbD017696.1;NbD047786.1;NbE03059616.1	973
NaN	NaN	NaN	17.0604	17.1089	17.0961				-1	6	1	1	23.1	5	5	29.395	0	13.778	1964900	16	12	NbD017820.1	NbD017820.1	980
20.2798	20.2098	20.3925	20.6658	20.6546	20.7017				-1	13	13	9	60	60	50.8	29.364	0	323.31	39238000	17	83	NbD019050.1;NbD017822.1	NbD019050.1;NbD017822.1	981
17.7221	17.9968	17.0118	16.9686	17.1834	16.9179				-1	4	4	2	14	14	5	37.523	0	62.293	2573400	20	27	NbD017832.1;NbE44069221.1	NbD017832.1;NbE44069221.1	982
NaN	NaN	NaN	17.4505	17.4908	17.4294				-1	4	4	4	13.9	13.9	13.9	32.598	0	27.464	1988800	9	21	NbE44072063.1;NbD017939.1;NbD017850.1;NbD033514.1;NbD046729.1	NbE44072063.1;NbD017939.1;NbD017850.1;NbD033514.1	983
15.3632	16.1811	16.1179	16.1815	16.2882	16.1428				-1	16	8	8	65	40.4	40.4	35.864	0	67.542	2224500	19	48	NbD017866.1	NbD017866.1	985
NaN	NaN	14.7118	15.4611	15.7005	15.6786				-1	5	5	2	15	15	8.3	57.603	0	55.618	1047600	30	19	NbD018033.1	NbD018033.1	992
17.8998	18.0781	17.8293	18.0695	17.9318	18.1104				-1	7	7	3	24.7	24.7	12.2	55.196	0	265.11	3782300	32	44	NbD018053.1;NbD038997.1;NbE44070960.1;NbD048874.1;NbE44070961.1	NbD018053.1;NbD038997.1;NbE44070960.1;NbD048874.1	994
17.5374	17.5464	17.3624	17.1279	17.0816	17.3442				-1	4	4	4	27.7	27.7	27.7	16.299	0	56.341	4780700	9	49	NbE05064459.1;NbD032154.1;NbD018089.1;NbE05063281.1;NbD018578.1;NbD017960.1	NbE05064459.1;NbD032154.1;NbD018089.1;NbE05063281.1;NbD018578.1;NbD017960.1	996
NaN	NaN	NaN	17.8028	17.6896	17.8108				-1	13	13	13	34.3	34.3	34.3	38.372	0	314.26	7790400	19	66	NbD018100.1;NbD032229.1	NbD018100.1	997
19.1478	19.183	19.0381	19.3105	19.4579	19.4204				-1	15	15	15	45.5	45.5	45.5	36.651	0	262.64	19136000	17	107	NbD018194.1	NbD018194.1	1005
NaN	NaN	NaN	15.4861	15.4444	15.4727				-1	2	2	2	4.1	4.1	4.1	87.78	0	15.921	320440	38	13	NbD018234.1	NbD018234.1	1006
17.6774	17.3455	18.0009	19.1178	19.0187	18.5433				-1	15	4	4	42.4	11.4	11.4	35.92	0	126.15	12161000	17	60	NbD018307.1;NbE05065193.1	NbD018307.1;NbE05065193.1	1007
16.43	16.3891	16.048	16.6415	16.4002	16.8364				-1	5	3	2	22.8	16.7	11.5	44.262	0	30.788	1877500	21	29	NbE05064302.1;NbD018370.1;NbE03058335.1	NbE05064302.1;NbD018370.1;NbE03058335.1	1009
NaN	NaN	NaN	15.6558	15.6238	15.7322				-1	3	3	3	34.6	34.6	34.6	14.79	0	28.635	818160	8	16	NbD050817.1;NbD040573.1;NbD019471.1;NbD018428.1;NbE05065820.1;NbD034970.1;NbE44073433.1;NbE03060055.1;NbD020181.1;NbD020182.1	NbD050817.1;NbD040573.1;NbD019471.1;NbD018428.1;NbE05065820.1;NbD034970.1;NbE44073433.1;NbE03060055.1;NbD020181.1	1013
19.8851	19.9026	19.7639	19.2527	19.5399	19.2549				-1	5	5	5	18.9	18.9	18.9	30.413	0	77.744	11655000	14	43	NbD032924.1;NbD018463.1	NbD032924.1;NbD018463.1	1016
15.8251	16.4618	16.2952	16.796	16.7694	16.616				-1	21	13	9	65.1	54.6	38.9	42.319	0	148.59	1985700	26	50	NbD018500.1	NbD018500.1	1017
15.2544	15.5287	15.2461	15.6652	15.7506	15.7924				-1	21	6	5	58.6	27	18.5	50.186	0	70.319	1092700	32	28	NbE03057227.1;NbD018501.1	NbE03057227.1;NbD018501.1	1018
NaN	NaN	NaN	16.4167	16.5315	16.4755				-1	3	2	1	14.1	10	5.3	36.959	0	37.206	996800	20	12	NbE03060453.1;NbD018548.1	NbE03060453.1;NbD018548.1	1021
15.2501	15.2689	15.0179	15.0163	14.8887	14.9948				-1	5	5	5	19.7	19.7	19.7	50.16	0	42.151	749300	22	24	NbD018589.1;NbD018446.1	NbD018589.1;NbD018446.1	1023
16.3552	16.4298	16.5738	NaN	16.5105	16.1556				-1	5	5	0	18.3	18.3	0	50.264	0	91.484	1615600	21	23	NbD031738.1;NbD018637.1;NbD025239.1;NbD023623.1	NbD031738.1;NbD018637.1;NbD025239.1;NbD023623.1	1026
16.6106	16.5591	16.4706	16.3853	16.3928	16.3438				-1	3	3	3	7.5	7.5	7.5	45.597	0	82.594	2232500	20	35	NbD018639.1;NbD031736.1	NbD018639.1	1027
17.3955	17.3813	17.1161	16.795	16.8543	16.5506				-1	8	8	8	13.3	13.3	13.3	110.58	0	85.713	2982700	42	44	NbD018648.1;NbE44072593.1;NbD026130.1;NbE44070351.1	NbD018648.1;NbE44072593.1;NbD026130.1;NbE44070351.1	1028
NaN	NaN	14.566	14.7298	14.7913	NaN				-1	2	2	2	18.8	18.8	18.8	20.723	0	47.157	507670	7	17	NbD018720.1;NbD031627.1	NbD018720.1;NbD031627.1	1031
15.3667	15.4717	15.9088	NaN	15.2103	15.2405				-1	8	2	2	33.2	7.9	7.9	33.507	0	32.794	747690	21	17	NbD018767.1	NbD018767.1	1034
NaN	14.7748	15.4776	16.2183	16.2005	16.284				-1	4	4	4	10.1	10.1	10.1	79.534	0	66.739	1549800	39	29	NbD018995.1;NbE03061979.1;NbE44073332.1;NbE03059960.1	NbD018995.1;NbE03061979.1;NbE44073332.1	1041
NaN	NaN	NaN	14.2761	14.1172	14.2159				-1	3	3	3	18.3	18.3	18.3	27.851	0	36.497	256260	14	13	NbD019026.1;NbE05066763.1	NbD019026.1;NbE05066763.1	1043
16.6486	16.5845	16.3115	16.4186	16.3144	16.4427				-1	8	8	1	18.5	18.5	2.1	61.451	0	110.38	2369100	30	38	NbD019109.1	NbD019109.1	1046
16.3062	16.0703	16.5086	16.3617	16.567	16.4237				-1	7	7	4	27.3	27.3	16.1	50.982	0	116.59	2635500	22	51	NbD019202.1;NbD011745.1	NbD019202.1	1053
16.1066	16.1129	16.3882	17.6071	17.6558	17.6666				-1	21	21	11	27.5	27.5	15.8	86.032	0	323.31	8615400	48	97	NbD019226.1	NbD019226.1	1056
NaN	NaN	16.4192	16.9275	16.9756	16.9206				-1	5	5	5	10.7	10.7	10.7	61.442	0	48.671	1519000	26	22	NbD019269.1	NbD019269.1	1057
16.5216	16.2653	16.7928	16.4081	16.3275	16.4927				-1	6	6	2	38.1	38.1	18.6	24.283	0	58.059	2302800	13	36	NbD019307.1	NbD019307.1	1058
16.3909	16.4726	NaN	16.6206	16.4061	16.7904				-1	8	8	8	16.2	16.2	16.2	78.3	0	76.998	1424500	41	25	NbD019309.1;NbE05067776.1;NbD004166.1	NbD019309.1;NbE05067776.1;NbD004166.1	1059
16.48	NaN	NaN	16.77	16.778	16.6374				-1	4	4	2	17.7	17.7	5.8	31.982	0	61.68	1254800	17	18	NbD019343.1	NbD019343.1	1061
NaN	NaN	NaN	17.3348	17.3346	17.2733				-1	5	5	5	10.2	10.2	10.2	65.403	0	90.41	2788000	24	32	NbD044787.1;NbD019389.1;NbD031076.1;NbD000101.1;NbD000396.1	NbD044787.1;NbD019389.1;NbD031076.1;NbD000101.1	1063
NaN	16.0438	NaN	18.6735	18.7951	18.7822				-1	62	5	5	68.6	9.6	9.6	107.7	0	194.54	6653900	57	35	NbD019391.1	NbD019391.1	1064
15.3302	15.4819	16.1158	15.2574	15.1933	15.1466				-1	2	1	1	12.5	7.3	7.3	31.037	0	26.554	892860	17	26	NbD019401.1;NbD021624.1;NbE03061728.1;NbD012528.1	NbD019401.1;NbD021624.1;NbE03061728.1;NbD012528.1	1067
19.7541	19.7112	20.0401	19.5807	19.5716	19.5069				-1	33	33	4	47.6	47.6	12.1	52.722	0	323.31	45027000	23	270	NbD019408.1	NbD019408.1	1068
17.1775	16.9614	18.0911	16.9181	16.9833	16.9425				-1	4	4	4	11.7	11.7	11.7	35.394	0	41.225	2425700	22	18	NbD035063.1;NbD019558.1	NbD035063.1;NbD019558.1	1072
NaN	NaN	NaN	17.2826	17.178	17.0943				-1	4	4	2	24.4	24.4	16.9	19.309	0	63.145	2643400	9	29	NbD040743.1;NbD048058.1;NbD042343.1;NbD019568.1;NbD040438.1	NbD040743.1;NbD048058.1;NbD042343.1;NbD019568.1;NbD040438.1	1073
NaN	NaN	15.2499	17.249	17.4902	17.4225				-1	4	4	4	41	41	41	8.8479	0	159.15	3858400	4	27	NbE05065398.1;NbD046197.1;NbD019649.1;NbD017004.1	NbE05065398.1;NbD046197.1;NbD019649.1;NbD017004.1	1076
NaN	NaN	NaN	16.3084	15.7194	15.9671				-1	7	7	4	31.5	31.5	24.6	30.244	0	98.906	972630	15	15	NbD019734.1;NbD044430.1;NbD019732.1	NbD019734.1;NbD044430.1;NbD019732.1	1081
15.2467	15.126	15.3206	15.3311	15.4342	15.386				-1	3	3	3	5.3	5.3	5.3	97.427	0	48.448	597670	37	23	NbD019766.1;NbE44071050.1;NbD039058.1	NbD019766.1;NbE44071050.1;NbD039058.1	1083
17.5275	17.3267	17.8025	17.9024	17.944	17.8569				-1	2	2	2	6.1	6.1	6.1	39.619	0	36.156	3532500	18	27	NbD019970.1	NbD019970.1	1087
16.2379	16.6503	16.0912	16.9384	16.9677	17.0426				-1	18	18	6	25.6	25.6	10.2	104.15	0	246.13	3957200	49	69	NbD019980.1	NbD019980.1	1089
15.8311	15.9156	16.5888	NaN	NaN	NaN				-1	3	3	3	27	27	27	10.889	0	74.37	708840	7	15	NbD020037.1	NbD020037.1	1090
NaN	NaN	NaN	15.4714	15.3415	15.4055				-1	1	1	1	3.8	3.8	3.8	54.888	0	73.777	307970	30	8	NbE05063775.1;NbD020300.1	NbE05063775.1;NbD020300.1	1094
NaN	NaN	NaN	16.0619	16.1491	16.1535				-1	8	1	1	20.4	3.2	3.2	63.364	0	36.585	909500	29	12	NbD020341.1	NbD020341.1	1096
16.5231	16.5931	16.4482	16.6882	16.8323	16.459				-1	4	4	4	6.7	6.7	6.7	113.69	0	49.139	1334800	49	24	NbD020349.1;NbD022604.1;NbE05062967.1;NbE44071345.1;NbE44071346.1;NbE03053367.1;NbE05062968.1	NbD020349.1;NbD022604.1;NbE05062967.1;NbE44071345.1;NbE44071346.1;NbE03053367.1;NbE05062968.1	1097
20.5178	20.8403	20.4307	19.6801	19.6896	19.7541				-1	41	41	13	54.6	54.6	24.5	66.619	0	323.31	89489000	35	401	NbE03058635.1;NbD031028.1;NbD020434.1;NbE44071750.1;NbD021662.1;NbD016205.1;NbD011063.1;NbD011064.1	NbE03058635.1;NbD031028.1;NbD020434.1;NbE44071750.1	1099
15.8789	15.2617	15.6644	16.3336	16.3882	15.9545				-1	17	17	17	34	34	34	58.966	0	187.41	2690500	29	63	NbD020449.1;NbD007438.1	NbD020449.1;NbD007438.1	1100
16.2918	16.0157	16.6039	16.4595	16.5551	16.4321				-1	6	6	6	31.8	31.8	31.8	25.152	0	75.731	1596000	10	27	NbD044523.1;NbD020515.1	NbD044523.1;NbD020515.1	1103
16.2182	16.0217	15.8455	16.293	16.2109	16.3529				-1	6	6	6	27.9	27.9	27.9	37.185	0	44.07	1288400	19	27	NbD020521.1	NbD020521.1	1104
17.2953	17.0752	16.0927	17.3216	17.1382	17.3568				-1	11	11	4	46.3	46.3	23.1	39.361	0	123.71	3065600	20	39	NbD020546.1;NbE44071421.1	NbD020546.1;NbE44071421.1	1105
16.4557	16.4233	16.3519	16.2163	16.2261	NaN				-1	7	7	6	15.4	15.4	15.4	53.582	0	75.618	1372400	22	23	NbD020659.1	NbD020659.1	1112
15.2949	15.1765	NaN	16.1085	16.1194	16.112				-1	10	10	10	10.9	10.9	10.9	147.85	0	105.1	1538800	93	43	NbD020669.1;NbE05064017.1;NbD051958.1	NbD020669.1;NbE05064017.1;NbD051958.1	1114
14.3068	14.9376	15.1375	17.0607	17.0265	17.1228				-1	19	19	11	26.3	26.3	13	125.66	0	306.92	5784000	66	95	NbE03055907.1;NbD020699.1	NbE03055907.1;NbD020699.1	1115
16.2876	16.4078	16.0531	NaN	NaN	NaN				-1	4	4	2	19.6	19.6	9.7	44.882	0	77.155	680930	23	15	NbD020769.1	NbD020769.1	1116
NaN	NaN	NaN	16.2338	16.4922	16.2085				-1	4	4	3	30.3	30.3	19.1	17.239	0	42.457	2075600	7	24	NbD020850.1;NbD025259.1	NbD020850.1	1118
15.787	16.0707	15.8598	15.2384	15.6533	15.4937				-1	3	3	1	6.9	6.9	2.5	57.827	0	43.352	1178900	22	26	NbE03055324.1;NbD049576.1;NbD020855.1	NbE03055324.1;NbD049576.1;NbD020855.1	1119
15.8614	15.3053	16.372	15.7711	15.696	NaN				-1	3	3	3	13.5	13.5	13.5	39.692	0	35.69	1372000	18	22	NbD020879.1	NbD020879.1	1121
14.3885	14.3494	14.904	15.2859	15.4632	15.4311				-1	4	4	4	11.7	11.7	11.7	67.276	0	302.2	1213700	34	31	NbD020892.1	NbD020892.1	1122
16.0756	NaN	NaN	16.8795	17.2741	17.0779				-1	7	7	7	13.9	13.9	13.9	59.828	0	243.21	1833400	27	29	NbD045853.1;NbD020960.1;NbE44070163.1;NbE05064062.1	NbD045853.1;NbD020960.1;NbE44070163.1;NbE05064062.1	1128
15.9814	15.956	15.9271	15.7727	15.8183	15.6995				-1	6	6	6	15.3	15.3	15.3	50.706	0	72.397	1690100	20	33	NbD029515.1;NbD021082.1	NbD029515.1;NbD021082.1	1135
17.5647	17.6771	17.525	17.1321	17.0782	NaN				-1	16	1	1	50.1	5.8	5.8	42.588	0	35.178	2140200	22	14	NbD021123.1	NbD021123.1	1136
NaN	15.5029	NaN	15.7975	15.9007	15.8281				-1	6	6	1	34.5	34.5	14.7	31.495	0	89.39	1022700	18	28	NbD021143.1	NbD021143.1	1138
19.2655	19.1881	19.2812	19.3626	19.3656	19.3482				-1	16	16	1	48.3	48.3	3.7	41.708	0	323.31	31228000	21	185	NbD021173.1	NbD021173.1	1140
18.6697	18.9312	18.5387	18.4003	18.3775	18.3322				-1	7	7	7	41.3	41.3	41.3	27.149	0	78.125	7463700	14	56	NbD021174.1;NbD024597.1;NbD053009.1	NbD021174.1;NbD024597.1	1141
17.0711	16.9998	17.459	17.5693	17.6484	17.6434				-1	13	13	12	23.9	23.9	23.9	38.7	0	195.09	7849800	16	67	NbD021317.1;NbD041991.1	NbD021317.1	1146
NaN	NaN	NaN	16.9827	16.9308	16.8799				-1	9	9	5	46.9	46.9	22.8	25.108	0	167.2	4233200	10	61	NbD042159.1;NbD021396.1	NbD042159.1;NbD021396.1	1150
NaN	NaN	NaN	18.0055	18.1347	17.9275				-1	6	2	2	15.5	3.9	3.9	55.069	0	47.316	3399100	27	19	NbD021400.2;NbD021400.1;NbD021399.1	NbD021400.2;NbD021400.1;NbD021399.1	1151
16.0348	15.9714	16.3066	15.9532	16.1218	15.8498				-1	5	5	5	15.6	15.6	15.6	49.13	0	88.9	1357800	24	30	NbE03057844.1;NbD040584.1;NbD021432.1;NbE44071409.1;NbD008409.1	NbE03057844.1;NbD040584.1;NbD021432.1;NbE44071409.1;NbD008409.1	1153
NaN	NaN	NaN	17.1386	17.0592	17.013				-1	8	5	3	31.9	29.7	19.1	36.196	0	32.507	1058200	17	15	NbD021435.1	NbD021435.1	1154
18.3743	18.3869	18.3952	18.144	18.1713	18.1832				-1	15	15	0	33.3	33.3	0	53.495	0	207.29	11707000	25	128	NbD021528.1;NbE03058632.1;NbD014675.1	NbD021528.1;NbE03058632.1	1158
15.7286	15.4955	NaN	14.8858	NaN	15.3257				-1	2	2	2	4.7	4.7	4.7	61.689	0	24.837	652400	31	13	NbE44069545.1;NbD049605.1;NbD021547.1	NbE44069545.1;NbD049605.1;NbD021547.1	1159
17.3097	16.89	17.1179	16.8417	16.9636	16.8225				-1	11	11	11	26.6	26.6	26.6	61.953	0	151.47	2449100	21	45	NbE03053920.1;NbD021595.1;NbD052302.1;NbE03056971.1;NbE03056972.1	NbE03053920.1;NbD021595.1;NbD052302.1;NbE03056971.1	1160
15.6754	15.5356	NaN	NaN	15.4306	15.4564				-1	3	1	1	8.3	3.3	3.3	64.794	0.0014354	7.8784	618100	32	14	NbD021724.1	NbD021724.1	1167
17.0254	17.064	16.5943	17.3789	17.303	17.4478				-1	15	15	8	15.9	15.9	7.6	135.05	0	210.22	4750600	65	89	NbD021794.1	NbD021794.1	1174
17.8006	17.8387	17.9958	18.6195	18.615	18.6182				-1	6	2	1	23.1	12.7	5	29.356	0	45.297	6819200	16	25	NbD021873.1	NbD021873.1	1176
18.1884	18.6291	18.3266	18.5944	19.1739	19.0024				-1	6	6	1	33.1	33.1	11	19.102	0	104.28	7434600	4	69	NbD021931.1	NbD021931.1	1178
NaN	NaN	NaN	14.8138	14.8713	15.0254				-1	5	5	5	4.8	4.8	4.8	219.8	0	49.344	397870	112	17	NbE44070891.1;NbE05067221.1;NbD021939.1;NbE05062901.1;NbD036437.1	NbE44070891.1;NbE05067221.1;NbD021939.1;NbE05062901.1;NbD036437.1	1179
17.5097	17.5558	17.2751	17.7588	17.7886	17.7731				-1	6	6	6	28.7	28.7	28.7	31.303	0	97.35	4581700	13	42	NbD021996.1	NbD021996.1	1181
15.7239	15.7786	15.6552	NaN	NaN	NaN				-1	1	1	1	4.9	4.9	4.9	25.224	0	15.97	757570	10	14	NbD022120.1	NbD022120.1	1182
18.9623	19.1703	19.0117	18.5096	18.4223	18.1794				-1	12	12	7	45.5	45.5	40.6	27.521	0	194.53	11441000	10	96	NbD022229.1;NbE05063168.1;NbD032309.1;NbE03062410.1	NbD022229.1;NbE05063168.1	1186
19.114	19.081	18.9425	19.4591	19.3646	19.4766				-1	13	13	9	62.8	62.8	40.7	24.378	0	323.31	20439000	14	97	NbD022240.1	NbD022240.1	1188
NaN	NaN	NaN	15.2965	15.3971	15.3358				-1	6	6	5	17.4	17.4	17.4	55.368	0	55.795	634910	28	21	NbD022309.1;NbE03061767.1;NbD018068.1;NbE44071766.1	NbD022309.1;NbE03061767.1;NbD018068.1;NbE44071766.1	1192
21.0856	21.0712	20.9711	21.5911	21.588	21.6693				-1	17	8	6	47.6	17.5	13.2	37.189	0	323.31	53082000	17	61	NbD022316.1	NbD022316.1	1193
16.4914	16.288	16.2804	17.3413	17.2304	17.2728				-1	15	4	4	21.4	8.4	8.4	83.749	0	116.38	3194000	47	37	NbD022380.1	NbD022380.1	1195
15.5321	15.5264	15.6226	15.6313	15.5167	15.5394				-1	2	2	2	1.8	1.8	1.8	149.83	0	18.275	1101400	65	23	NbE05067118.1;NbD040631.1;NbD022407.1	NbE05067118.1;NbD040631.1;NbD022407.1	1196
16.9488	16.6517	16.3239	16.9316	17.1331	17.1078				-1	4	4	4	15.2	15.2	15.2	48.454	0	94.53	2106600	26	27	NbD034213.1;NbD022448.1;NbE05066899.1;NbD052132.1	NbD034213.1;NbD022448.1;NbE05066899.1	1198
NaN	NaN	NaN	16.6882	16.403	16.6426				-1	2	1	1	8.8	5.4	5.4	50.736	0	34.041	1153400	20	13	NbD035602.1;NbD032143.1;NbD022562.1;NbD013219.1	NbD035602.1;NbD032143.1;NbD022562.1;NbD013219.1	1201
NaN	NaN	NaN	16.7519	16.732	16.7241				-1	9	9	9	53.5	53.5	53.5	16.238	0	64.156	2224900	8	29	NbD022585.1;NbD014268.1;NbD029831.1;NbD007551.1;NbE44070061.1;NbD011520.1;NbD022584.1;NbE03054593.1	NbD022585.1;NbD014268.1;NbD029831.1;NbD007551.1;NbE44070061.1;NbD011520.1	1204
15.3509	15.3355	15.9856	18.4291	18.2865	18.3246				-1	27	27	0	55.5	55.5	0	61.213	0	323.31	15219000	42	136	NbD022620.1	NbD022620.1	1206
16.4701	16.4679	16.6253	16.815	15.9153	NaN				-1	5	5	5	17.5	17.5	17.5	39.534	0	55.09	2075300	20	31	NbD022660.1	NbD022660.1	1208
17.2576	17.1874	17.6561	17.0788	17.289	17.0474				-1	5	5	5	60	60	60	12.842	0	95.208	3345700	8	45	NbD022750.1;NbE03062179.1;NbE03061630.1	NbD022750.1;NbE03062179.1;NbE03061630.1	1210
14.5066	14.3643	14.1566	14.535	NaN	NaN				-1	2	2	2	9	9	9	50.39	0	17.424	351440	29	15	NbD022809.1;NbE05067099.1	NbD022809.1;NbE05067099.1	1214
NaN	NaN	NaN	16.6987	16.6576	16.8573				-1	2	2	2	5.9	5.9	5.9	58.978	0	19.407	1324000	33	16	NbD027495.1;NbD022849.1	NbD027495.1;NbD022849.1	1215
15.2923	15.0735	15.2353	14.9862	15.0952	15.0166				-1	6	4	4	17.2	12	12	61.29	0	37.125	837450	34	31	NbD022859.1	NbD022859.1	1216
NaN	12.7143	NaN	13.3035	NaN	14.4572				-1	3	3	1	8.3	8.3	2.5	47.901	0	25.219	300170	20	17	NbD022982.1	NbD022982.1	1220
16.0026	16.0361	16.1487	15.575	15.6269	15.4251				-1	5	5	4	17.4	17.4	17.4	40.121	0	76.487	1382600	13	33	NbE05065788.1;NbE44073368.1;NbD022994.1	NbE05065788.1;NbE44073368.1;NbD022994.1	1221
NaN	NaN	NaN	14.685	14.8729	14.9484				-1	11	3	3	16.9	3.5	3.5	123.91	0	22.563	455580	63	15	NbE03054254.1;NbD023107.1	NbE03054254.1;NbD023107.1	1225
17.3656	17.3667	17.4966	NaN	16.9343	17.3356				-1	6	6	3	18.7	18.7	6.9	40.715	0	46.938	2560200	20	27	NbD023260.1;NbE03055596.1	NbD023260.1;NbE03055596.1	1231
15.5976	15.6428	15.8715	15.8615	15.8646	15.81				-1	5	5	1	39.9	39.9	9.9	22.395	0	71.793	1478200	14	33	NbD023353.1;NbE05065239.1	NbD023353.1;NbE05065239.1	1233
17.7956	17.8644	17.7711	17.3446	17.0818	17.41				-1	4	4	4	15.2	15.2	15.2	49.709	0	50.584	2245700	25	30	NbD023408.1;NbE44071954.1	NbD023408.1;NbE44071954.1	1235
NaN	NaN	NaN	15.5544	15.423	15.6448				-1	2	2	2	14.1	14.1	14.1	34.359	0	24.176	607190	17	15	NbD023423.1	NbD023423.1	1237
17.3863	17.6411	17.6739	17.5434	17.7245	17.6989				-1	4	4	4	48.3	48.3	48.3	13.617	0	122.24	4803400	7	43	NbD040431.1;NbD023489.1;NbD048505.1;NbD046679.1;NbD013775.1	NbD040431.1;NbD023489.1	1238
16.0656	15.8484	NaN	15.2377	15.3095	15.4663				-1	7	7	7	14.5	14.5	14.5	92.3	0	52.048	1335400	46	25	NbD023509.1	NbD023509.1	1240
16.9022	16.9394	17.1735	17.2031	17.1713	17.2085				-1	8	8	4	24.3	24.3	9.9	43.867	0	129.51	4810600	22	52	NbD023596.1	NbD023596.1	1243
16.122	16.3669	16.4545	16.3519	16.4025	16.4199				-1	6	6	6	65	65	65	10.981	0	124.76	2194000	5	34	NbD024925.1;NbD023613.1	NbD024925.1;NbD023613.1	1246
NaN	NaN	NaN	15.8675	16.2209	16.0032				-1	4	1	1	28.1	4.7	4.7	32.198	0.0010554	9.9872	695720	21	12	NbD023811.1	NbD023811.1	1252
NaN	NaN	NaN	16.0111	16.0957	15.9245				-1	17	2	2	47.8	11.7	11.7	35.91	0	25.427	1028100	21	13	NbD023842.1	NbD023842.1	1253
16.9491	17.1129	17.2114	17.4133	17.4217	17.3098				-1	8	8	2	28.6	28.6	5.9	45.598	0	75.078	4424500	18	56	NbD023862.1;NbE03059467.1;NbE44074440.1	NbD023862.1;NbE03059467.1;NbE44074440.1	1254
NaN	NaN	NaN	14.762	14.8706	14.8895				-1	4	4	4	13.1	13.1	13.1	70.855	0	38.902	473910	25	16	NbE44069792.1;NbE44069791.1;NbD023878.1;NbD016350.1	NbE44069792.1;NbE44069791.1;NbD023878.1;NbD016350.1	1255
15.4626	15.6047	NaN	16.4161	16.0778	16.018				-1	7	7	7	19.9	19.9	19.9	43.466	0	108.9	1920800	24	39	NbD050073.1;NbD023889.1	NbD050073.1;NbD023889.1	1256
16.6342	16.5635	16.0632	16.3366	16.28	16.2602				-1	19	1	1	33	5.1	5.1	73.217	0	49.118	1180400	37	18	NbD023909.1	NbD023909.1	1258
13.4955	12.9666	NaN	18.3886	18.4186	18.3191				-1	22	22	12	37.8	37.8	24.6	79.55	0	323.31	13249000	40	138	NbD023974.1	NbD023974.1	1261
NaN	NaN	NaN	15.3952	15.3796	15.2672				-1	3	3	3	4.1	4.1	4.1	182.99	0	36.719	831340	73	18	NbD023977.1;NbE03053520.1	NbD023977.1;NbE03053520.1	1262
15.3959	14.986	16.2141	15.244	15.5076	15.4183				-1	34	4	4	60.6	10.5	10.5	63.31	0	64.377	1108700	35	27	NbD023987.1	NbD023987.1	1263
17.9024	17.8117	17.8416	18.0456	17.9664	18.0416				-1	16	4	1	48.3	13.5	4.2	41.757	0	55.405	3823800	21	25	NbD052248.1;NbD024063.1;NbD015393.1;NbD044964.1	NbD052248.1;NbD024063.1;NbD015393.1	1265
14.7817	NaN	NaN	16.4442	16.1215	15.7942				-1	2	1	1	15.1	10.1	10.1	20.498	0	14.484	887210	10	14	NbD024195.1;NbD048979.1;NbD038334.1	NbD024195.1;NbD048979.1;NbD038334.1	1269
17.3652	NaN	17.6258	18.0397	18.135	NaN				-1	2	2	2	7.5	7.5	7.5	25.967	0	192.73	3503500	10	16	NbD024308.1	NbD024308.1	1274
16.2168	16.5891	15.9282	16.4549	16.34	16.378				-1	7	7	7	36.4	36.4	36.4	35.386	0	82.832	2230800	17	45	NbD024340.1;NbD024339.1;NbD000290.1;NbD022216.1;NbD007319.1;NbD029346.1	NbD024340.1;NbD024339.1;NbD000290.1	1276
15.8644	15.2385	15.882	18.134	18.0742	18.0935				-1	14	14	3	52.6	52.6	16.3	36.579	0	323.31	10376000	17	96	NbD024468.1	NbD024468.1	1281
NaN	NaN	NaN	15.6473	15.6451	15.5114				-1	5	5	5	16.7	16.7	16.7	47.477	0	53.255	558150	24	17	NbD024519.1;NbE05066552.1;NbE44069253.1;NbE05068112.1;NbD051729.1	NbD024519.1;NbE05066552.1;NbE44069253.1;NbE05068112.1;NbD051729.1	1282
NaN	NaN	NaN	15.5693	16.0052	15.8651				-1	6	6	3	16.7	16.7	8.7	46.509	0	75.008	1605600	16	33	NbD024559.1	NbD024559.1	1284
NaN	NaN	NaN	17.4777	17.6887	17.7136				-1	13	4	4	20.6	7.3	7.3	100.37	0	27.681	2320800	56	17	NbD024579.1;NbE05063359.1	NbD024579.1;NbE05063359.1	1285
NaN	NaN	NaN	15.1661	14.644	14.9271				-1	7	4	4	12.8	8.6	8.6	76.265	0	110	678530	25	19	NbE05067310.1;NbD024731.1	NbE05067310.1;NbD024731.1	1286
NaN	NaN	NaN	15.8552	16.0665	15.7603				-1	5	5	5	41.5	41.5	41.5	16.697	0	30.401	626170	9	15	NbD042647.1;NbD024762.1;NbD035112.1;NbD001268.1;NbD034742.1;NbD013148.1	NbD042647.1;NbD024762.1;NbD035112.1;NbD001268.1;NbD034742.1;NbD013148.1	1289
16.8651	16.9246	16.7235	16.4635	16.4304	16.3157				-1	7	3	2	28.2	14.6	9.5	42.624	0	33.501	1848700	22	26	NbD024768.1;NbD030018.1;NbE03061739.1	NbD024768.1;NbD030018.1;NbE03061739.1	1290
16.3601	16.5342	16.1515	16.4838	16.511	16.6141				-1	14	8	7	30	24	21.7	70.102	0	98.077	2558100	36	70	NbD024818.1;NbE44073109.1;NbE05067442.1;NbD044294.1	NbD024818.1;NbE44073109.1;NbE05067442.1	1292
14.9531	14.9003	14.8503	14.6665	14.8776	14.8908				-1	3	3	3	15.1	15.1	15.1	35.218	0	45.284	513360	18	19	NbD024824.1	NbD024824.1	1293
NaN	NaN	NaN	15.311	15.1515	15.0695				-1	2	2	2	10.1	10.1	10.1	38.117	0	33.388	554540	19	15	NbD024919.1;NbD046098.1	NbD024919.1;NbD046098.1	1298
16.1645	16.7315	NaN	16.3303	16.2479	16.3458				-1	12	1	1	41.6	7.5	7.5	38.611	0	56.916	1044000	22	14	NbD024950.1	NbD024950.1	1301
NaN	NaN	NaN	15.4023	15.1686	15.3032				-1	5	1	1	17.7	8	8	28.305	0	17.891	417710	9	10	NbD024953.1	NbD024953.1	1302
20.7806	20.8647	20.8448	20.4872	20.6664	20.4954				-1	13	13	0	27.5	27.5	0	41.865	0	323.31	35360000	20	198	NbD046880.1;NbD024969.1	NbD046880.1;NbD024969.1	1303
17.6776	18.1519	17.6045	16.9877	16.3124	NaN				-1	8	8	8	28.6	28.6	28.6	42.693	0	154.55	2484100	26	29	NbE44074169.1;NbD038978.1;NbD025005.1;NbE03059725.1	NbE44074169.1;NbD038978.1;NbD025005.1	1305
NaN	NaN	NaN	18.2379	18.208	18.2656				-1	18	2	2	43.1	6.3	6.3	58.698	0	24.181	2971800	32	18	NbD025064.1	NbD025064.1	1309
15.8917	15.965	15.8402	16.4311	16.4131	16.3394				-1	9	9	2	29.9	29.9	6.1	29.536	0	83.221	3397000	14	64	NbD025143.1;NbD021002.1	NbD025143.1	1312
18.6409	18.7593	18.6726	19.0718	19.0644	19.1619				-1	39	39	22	37.7	37.7	26.9	110.03	0	323.31	39745000	60	251	NbD025146.1;NbE44072113.1	NbD025146.1;NbE44072113.1	1313
NaN	15.6442	15.5876	15.4143	15.4902	15.6185				-1	29	4	4	32.4	4.7	4.7	84.581	0	35.437	961230	40	24	NbD025161.1	NbD025161.1	1315
16.1317	16.282	16.1504	16.486	16.4387	16.3759				-1	7	7	1	9.2	9.2	2.4	157.43	0	174.69	1767100	62	32	NbE03053363.1;NbD025242.1;NbD038692.1	NbE03053363.1;NbD025242.1;NbD038692.1	1318
NaN	NaN	18.1059	18.1543	18.1032	NaN				-1	2	2	1	12.4	12.4	9.3	24.093	0	13.916	2359400	6	18	NbD025243.1	NbD025243.1	1319
16.5791	16.4702	16.4955	16.146	15.9662	NaN				-1	11	11	11	21	21	21	69.391	0	100.79	1896500	27	31	NbD049811.1;NbD025385.1;NbE03055016.1	NbD049811.1;NbD025385.1;NbE03055016.1	1324
NaN	NaN	NaN	16.3445	16.3305	16.4437				-1	17	10	10	21.5	15	15	142.47	0	193.13	2703900	62	60	NbE05068254.1;NbD025457.1	NbE05068254.1;NbD025457.1	1328
NaN	NaN	NaN	17.4321	17.3273	17.2468				-1	8	2	2	34.4	13.7	13.7	24.792	0	35.689	2135600	7	19	NbD025469.1;NbD024722.1;NbD023955.1;NbD011424.1;NbD041917.1;NbE03058825.1;NbE05065416.1	NbD025469.1;NbD024722.1;NbD023955.1;NbD011424.1;NbD041917.1;NbE03058825.1	1330
19.7562	19.8674	19.7049	19.4726	19.5436	19.6837				-1	19	19	19	98.1	98.1	98.1	17.496	0	323.31	54924000	7	262	NbD025509.1;NbD000112.1	NbD025509.1	1332
NaN	14.47	NaN	14.5744	14.447	14.5202				-1	2	2	2	25	25	25	12.256	0	28.392	241040	6	9	NbD025526.1;NbD042910.1	NbD025526.1;NbD042910.1	1333
17.3157	17.3554	17.3843	16.8391	NaN	16.3333				-1	4	4	4	30.7	30.7	30.7	17.665	0	126.38	1774800	10	23	NbE03058465.1;NbD052042.1;NbD025608.1	NbE03058465.1;NbD052042.1;NbD025608.1	1339
16.3096	16.4029	16.5495	17.413	17.3417	17.3306				-1	17	17	8	23.1	23.1	9.1	94.906	0	323.31	6219800	53	80	NbE44069004.1;NbD025668.1	NbE44069004.1;NbD025668.1	1341
16.2826	16.3249	16.1305	16.5802	NaN	16.6234				-1	3	3	2	15.6	15.6	9.9	39.347	0	25.759	1451900	16	23	NbD025686.1;NbD024830.1;NbD029919.1;NbE05067563.1;NbD006083.1	NbD025686.1;NbD024830.1;NbD029919.1;NbE05067563.1;NbD006083.1	1342
NaN	NaN	NaN	15.168	15.2087	15.0811				-1	11	3	3	15.8	7	7	93.018	0	56.175	758850	39	21	NbD025748.1;NbE03058586.1	NbD025748.1;NbE03058586.1	1345
16.8487	17.0845	16.8294	17.428	17.305	17.3298				-1	4	4	4	11.7	11.7	11.7	47.028	0	44.059	2585300	19	30	NbD025765.1;NbD034359.1	NbD025765.1;NbD034359.1	1347
NaN	NaN	NaN	15.2659	15.3993	15.2324				-1	3	3	3	21.3	21.3	21.3	30.706	0	39.105	665990	14	14	NbE44072281.1;NbD025860.1;NbE03054741.1;NbD044147.1;NbE44070708.1	NbE44072281.1;NbD025860.1;NbE03054741.1;NbD044147.1;NbE44070708.1	1354
NaN	NaN	NaN	15.7299	15.7217	15.7308				-1	4	4	2	9.3	9.3	3.6	60.686	0	40.196	636800	32	18	NbD025909.1	NbD025909.1	1355
NaN	NaN	NaN	16.798	16.6742	16.7016				-1	15	5	4	23.7	10.2	8.9	84.923	0	42.197	1657900	48	23	NbE03055346.1;NbD025915.1	NbE03055346.1;NbD025915.1	1356
15.4761	NaN	15.1193	15.3007	NaN	NaN				-1	2	2	1	9.3	9.3	5.8	31.908	0	12.623	456680	17	11	NbE03053760.1;NbD025986.1	NbE03053760.1;NbD025986.1	1358
NaN	NaN	16.5319	16.3626	17.1825	NaN				-1	4	3	3	7.9	5.5	5.5	59.875	0	27.595	1288600	27	16	NbD026080.1	NbD026080.1	1364
16.2683	16.423	16.2756	16.3496	16.3807	16.4797				-1	6	6	6	21.2	21.2	21.2	43.005	0	63.583	2185900	23	34	NbD044725.1;NbD026141.1	NbD044725.1;NbD026141.1	1366
18.0355	17.9358	17.8187	17.9175	17.9414	17.8983				-1	22	18	4	72.1	63.8	14.5	42.482	0	323.31	14919000	26	169	NbD026241.1	NbD026241.1	1368
15.15	15.1818	NaN	NaN	15.4254	15.585				-1	2	2	2	9.2	9.2	9.2	29.646	0	36.716	583280	16	15	NbE44069021.1;NbD026383.1	NbE44069021.1;NbD026383.1	1373
NaN	NaN	NaN	14.5131	14.4797	14.8724				-1	2	2	2	3.4	3.4	3.4	61.312	0	12.908	199980	27	7	NbE03060117.1;NbE03055760.1;NbD042709.1;NbD026461.1	NbE03060117.1;NbE03055760.1;NbD042709.1;NbD026461.1	1377
17.3071	17.2563	17.4648	16.8747	16.9408	16.7911				-1	7	7	3	14.9	14.9	7.3	80.874	0	73.415	2985100	35	36	NbD026610.1;NbE03060967.1;NbD007921.1	NbD026610.1;NbE03060967.1;NbD007921.1	1381
NaN	NaN	NaN	16.4505	16.5149	16.3153				-1	10	7	2	9.2	7.8	3.3	209.03	0	54.215	1323600	92	31	NbD026839.1;NbE05063410.1;NbE03056560.1	NbD026839.1;NbE05063410.1;NbE03056560.1	1389
NaN	NaN	NaN	15.3985	15.478	15.4734				-1	2	2	2	5.6	5.6	5.6	89.547	0	19.406	354870	37	9	NbD026907.1	NbD026907.1	1395
14.9936	14.9853	14.7421	NaN	NaN	14.7215				-1	3	3	3	22.5	22.5	22.5	28.007	0	22.569	542230	11	16	NbD026977.1	NbD026977.1	1397
16.3171	16.8022	16.0476	16.8219	16.9361	16.954				-1	8	8	7	13.8	13.8	11.6	75.032	0	192.25	3286300	31	46	NbE05064923.1;NbD026995.1	NbE05064923.1;NbD026995.1	1400
NaN	14.4996	NaN	15.6036	15.628	15.6472				-1	8	6	6	12.5	9.8	9.8	105.24	0	70.775	922910	46	26	NbD039302.1;NbD026998.1;NbD005222.1;NbD048664.1;NbE44073973.1;NbD046056.1	NbD039302.1;NbD026998.1	1401
18.4717	17.9507	18.0205	18.6549	18.7423	18.5472				-1	6	6	6	12.9	12.9	12.9	62.357	0	105.84	6614700	32	49	NbD027186.1	NbD027186.1	1409
17.0537	16.5911	NaN	17.1322	17.1778	17.1836				-1	4	4	4	24.7	24.7	24.7	17.757	0	65.134	1818200	10	21	NbD049164.1;NbD027400.1	NbD049164.1;NbD027400.1	1415
15.8329	16.0928	16.0309	NaN	15.676	NaN				-1	13	1	1	44	9.2	9.2	37.631	0	22.882	602400	19	15	NbD027434.1	NbD027434.1	1416
NaN	14.729	NaN	15.0274	15.3757	NaN				-1	3	3	3	7.3	7.3	7.3	77.845	0	69.669	603590	44	17	NbE44073333.1;NbD027473.1;NbD004865.1	NbE44073333.1;NbD027473.1;NbD004865.1	1417
16.1743	16.6936	16.3453	15.9192	15.9071	15.778				-1	7	7	7	19	19	19	58.438	0	69.305	2183000	30	42	NbD037886.1;NbD027492.1	NbD037886.1;NbD027492.1	1419
16.9417	16.5933	17.0414	17.6227	17.6187	17.6412				-1	6	6	3	17.6	17.6	17	17.363	0	323.31	6526000	11	64	NbD027499.1;NbD042543.1;NbE05062791.1	NbD027499.1;NbD042543.1	1420
15.5471	15.1601	15.5753	15.6863	15.7953	15.8539				-1	4	4	4	16.4	16.4	16.4	36.479	0	100.07	1112300	17	25	NbD027529.1;NbD044680.1	NbD027529.1;NbD044680.1	1421
17.8538	17.3803	17.5767	17.297	17.144	17.1507				-1	9	7	7	26	23.3	23.3	45.474	0	129.01	2585400	22	38	NbD027578.1;NbD030046.1;NbE03054884.1	NbD027578.1;NbD030046.1;NbE03054884.1	1425
18.8986	18.9961	18.7229	19.5892	19.5092	19.5443				-1	5	5	5	23.8	23.8	23.8	24.747	0	161.76	15832000	11	62	NbE03060296.1;NbD027601.1;NbD017118.1;NbD031658.1;NbE03061927.1;NbD006929.1;NbD006930.1;NbD005585.1	NbE03060296.1;NbD027601.1;NbD017118.1;NbD031658.1;NbE03061927.1;NbD006929.1	1427
18.401	18.4865	18.3284	18.2638	18.2252	18.1157				-1	20	20	8	52.2	52.2	23.7	52.664	0	323.31	14799000	27	120	NbD027633.1;NbD026020.1	NbD027633.1;NbD026020.1	1429
15.4634	15.4611	15.4495	16.0053	16.1357	16.0463				-1	10	3	3	16.5	7.5	7.5	97.86	0	32.892	850040	48	19	NbD027713.1;NbD027713.2	NbD027713.1	1433
NaN	NaN	NaN	15.9606	16.0098	16.0039				-1	7	6	6	8.6	7.8	7.8	173.41	0	117.27	1190700	79	25	NbD027867.1;NbE03058222.1;NbD031858.1;NbE03056429.1	NbD027867.1;NbE03058222.1;NbD031858.1	1439
17.0932	17.2142	16.8103	NaN	16.5813	16.3737				-1	3	3	3	28.6	28.6	28.6	20.122	0	60.45	1847800	11	28	NbD031860.1;NbD027868.1;NbE03059519.1;NbD031861.1	NbD031860.1;NbD027868.1;NbE03059519.1;NbD031861.1	1440
NaN	16.5394	16.421	NaN	NaN	16.8236				-1	3	3	3	14	14	14	25.71	0	21.794	1273300	10	18	NbD028041.1	NbD028041.1	1443
17.1938	17.1844	17.0707	17.0432	16.3267	17.067				-1	5	3	2	37.4	26.9	19.6	25.682	0	44.044	1490800	15	22	NbD028043.1	NbD028043.1	1445
NaN	15.8233	16.1306	NaN	NaN	15.3731				-1	10	2	2	32.1	4.3	4.3	40.61	0	19.408	723200	24	17	NbD028046.1	NbD028046.1	1446
16.0382	15.654	15.8266	15.5476	15.6457	15.6032				-1	10	10	9	60.7	60.7	57.7	19.793	0	100.97	1468300	10	39	NbD028091.1;NbD029998.1;NbE03059269.1;NbD030440.1;NbD014387.1	NbD028091.1;NbD029998.1;NbE03059269.1;NbD030440.1;NbD014387.1	1449
15.9726	15.7481	16.2876	16.1734	15.7652	NaN				-1	6	6	6	12.4	12.4	12.4	91.009	0	49.046	1325100	42	30	NbD028114.1;NbD020789.1;NbE05068644.1;NbE03058836.1;NbD033661.1;NbD021021.1	NbD028114.1;NbD020789.1	1450
18.557	18.4042	18.5549	18.4782	18.6067	18.5513				-1	25	25	2	51.2	51.2	6.9	68.665	0	323.31	25642000	38	181	NbD028153.1;NbD022051.1;NbE44070587.1;NbD032921.1	NbD028153.1;NbD022051.1	1451
20.0522	21.2615	20.3946	20.2798	20.4762	20.5797				-1	5	1	0	39.4	7.8	0	20.361	0	26.658	14785000	12	20	NbD028157.1	NbD028157.1	1452
17.5664	17.7669	17.4808	17.4282	17.42	17.5148				-1	4	4	4	71.1	71.1	71.1	12.365	0	147.68	3662100	8	47	NbD028243.1	NbD028243.1	1455
NaN	NaN	NaN	16.178	16.2844	16.2726				-1	9	9	4	28.6	28.6	13	39.711	0	65.998	1513100	24	34	NbD028335.1	NbD028335.1	1461
16.5005	16.3981	16.8596	16.781	16.998	16.9794				-1	3	3	3	37.4	37.4	37.4	15.25	0	28.609	1763700	9	25	NbD028345.1	NbD028345.1	1462
15.6454	15.7021	15.5327	15.4432	15.4097	15.4827				-1	5	3	2	19.6	11	5.7	46.687	0	43.843	764420	19	18	NbD028389.1	NbD028389.1	1467
NaN	NaN	NaN	17.835	17.8465	17.7839				-1	9	9	2	40	40	13.3	23.339	0	85.864	3233900	12	34	NbD028502.1;NbD049173.1;NbD006402.1;NbD000786.1;NbD011065.1	NbD028502.1;NbD049173.1;NbD006402.1;NbD000786.1	1470
16.283	16.2747	16.512	16.0548	16.2847	16.2834				-1	4	4	4	9.3	9.3	9.3	58.466	0	59.492	1332300	27	21	NbD028560.1;NbD006807.1	NbD028560.1	1473
NaN	NaN	NaN	16.8076	16.4931	16.7356				-1	5	5	3	29.5	29.5	18.9	13.628	0	45.023	1622300	7	20	NbD029200.1;NbD028565.1	NbD029200.1;NbD028565.1	1474
14.7674	NaN	NaN	15.1845	15.0363	15.5574				-1	4	4	4	6.8	6.8	6.8	35.868	0	27.839	571490	15	14	NbE44069368.1;NbE05067373.1;NbD028661.1	NbE44069368.1;NbE05067373.1;NbD028661.1	1477
17.0601	17.0687	17.0268	17.136	17.1573	17.204				-1	8	8	6	64.4	64.4	61.5	16.584	0	113.97	2551800	11	38	NbD028672.1;NbE44069748.1;NbE03060915.1;NbD019851.1;NbE05068508.1	NbD028672.1;NbE44069748.1;NbE03060915.1;NbD019851.1;NbE05068508.1	1478
15.8132	15.7019	15.9947	NaN	15.5432	NaN				-1	4	4	3	9.4	9.4	8	61.907	0	39.612	1110000	31	22	NbD028706.1	NbD028706.1	1480
17.4364	17.4226	17.2136	16.0087	16.3011	16.2609				-1	7	7	2	11.1	11.1	4.5	87.605	0	77.053	2572200	39	45	NbE44072412.1;NbD028722.1;NbE03060801.1;NbD038080.1;NbD007011.1	NbE44072412.1;NbD028722.1;NbE03060801.1;NbD038080.1	1481
NaN	NaN	NaN	15.1255	14.9229	15.113				-1	1	1	1	1.4	1.4	1.4	112.05	0	14.465	650780	43	12	NbD035351.1;NbD028945.1	NbD035351.1;NbD028945.1	1490
15.7711	15.4225	15.691	17.16	17.2997	17.1735				-1	5	5	5	4	4	4	236.38	0	124.23	2108400	119	33	NbD029079.1	NbD029079.1	1493
NaN	NaN	NaN	15.2624	15.4406	15.3738				-1	10	4	2	32.9	11.6	7.3	34.54	0	114.31	1158500	11	29	NbD029126.1;NbE03060847.1;NbE44070740.1	NbD029126.1;NbE03060847.1;NbE44070740.1	1498
14.902	15.0991	15.1086	15.2818	15.2284	15.3707				-1	5	5	1	8.6	8.6	1.5	129	0	43.764	877080	56	25	NbD029137.1;NbE03057144.1	NbD029137.1;NbE03057144.1	1499
17.6473	17.5897	17.0506	NaN	15.7797	NaN				-1	15	7	5	24.3	11.2	6.4	93.674	0	92.227	1680700	42	24	NbD029169.1	NbD029169.1	1500
14.9252	14.7007	15.1053	15.9105	15.8163	NaN				-1	3	3	3	8.4	8.4	8.4	103.29	0	35.596	951700	43	18	NbE05063989.1;NbD029170.1;NbE44074610.1	NbE05063989.1;NbD029170.1;NbE44074610.1	1501
NaN	NaN	NaN	21.0406	21.1053	21.1823				-1	5	5	5	36.8	36.8	36.8	17.523	0	94.943	19459000	8	26	NbD029299.1;NbE05063025.1;NbD010804.1;NbD010758.1;NbD022905.1;NbE05066957.1;NbD044351.1;NbD026178.1	NbD029299.1;NbE05063025.1;NbD010804.1;NbD010758.1;NbD022905.1;NbE05066957.1;NbD044351.1;NbD026178.1	1511
15.4494	15.4866	NaN	16.1014	15.7838	16.0201				-1	5	3	3	39	18.5	18.5	34.161	0	41.525	861010	15	15	NbD029434.1	NbD029434.1	1516
NaN	NaN	17.9252	17.4202	17.0254	17.187				-1	20	2	2	41.8	3.6	3.6	55.41	0	50.461	2507200	21	16	NbD029578.1;NbE05067733.1	NbD029578.1;NbE05067733.1	1517
15.1912	15.2171	NaN	15.0849	15.2527	15.0025				-1	6	3	3	31.8	18.8	18.8	29.183	0	39.498	571120	17	17	NbD047427.1;NbD029673.1	NbD047427.1;NbD029673.1	1524
NaN	NaN	15.0413	15.1826	NaN	15.1301				-1	1	1	1	9.9	9.9	9.9	33.571	0	14.521	555760	15	13	NbE05064354.1;NbD049501.1;NbD029678.1	NbE05064354.1;NbD049501.1;NbD029678.1	1525
NaN	15.7008	NaN	NaN	15.9713	15.9139				-1	5	5	5	8.5	8.5	8.5	83.526	0	49.314	931610	35	16	NbD029690.1;NbD007159.1	NbD029690.1	1526
14.78	14.6884	14.5037	15.2811	15.3365	15.2175				-1	6	6	1	14.4	14.4	3.6	57.012	0	43.066	941420	30	33	NbD029704.1;NbE03057853.1;NbD041214.1	NbD029704.1;NbE03057853.1	1528
16.6206	16.701	NaN	16.2164	NaN	16.1768				-1	4	4	4	21.4	21.4	21.4	32.127	0	25.331	921120	17	16	NbD029721.1	NbD029721.1	1529
NaN	NaN	NaN	16.392	16.3652	16.4226				-1	6	1	1	26	4.7	4.7	29.184	0.0021825	6.8234	1304900	15	12	NbD029764.1	NbD029764.1	1532
15.4746	15.4984	15.717	NaN	NaN	NaN				-1	3	3	3	8.4	8.4	8.4	58.224	0	22.762	955710	29	16	NbD029921.1	NbD029921.1	1537
20.0867	19.9193	20.3864	20.3143	20.6266	20.4723				-1	15	9	6	60.8	35.4	23.1	13.452	0	323.31	37105000	8	69	NbD044082.1;NbD030113.1	NbD044082.1;NbD030113.1	1540
14.3753	14.4567	14.0636	14.5028	14.3015	NaN				-1	4	4	4	23	23	23	29.341	0	35.626	378670	18	15	NbD030156.2;NbE05066281.1;NbD030156.1;NbE03059082.1;NbD025138.1	NbD030156.2;NbE05066281.1;NbD030156.1;NbE03059082.1;NbD025138.1	1542
17.2425	16.7338	16.7834	17.6106	17.5971	17.5137				-1	22	22	7	23.7	23.7	8.1	143.93	0	323.31	6728900	69	101	NbD030308.1;NbE05067208.1	NbD030308.1;NbE05067208.1	1549
15.7884	15.5973	15.8495	NaN	15.5928	15.4396				-1	2	2	2	7.7	7.7	7.7	47.029	0	17.827	549760	21	16	NbE05067728.1;NbD030387.1;NbE03056475.1;NbD049896.1	NbE05067728.1;NbD030387.1;NbE03056475.1;NbD049896.1	1551
18.5469	18.6345	18.6317	18.4997	18.4447	18.4433				-1	12	12	12	40.8	40.8	40.8	41.296	0	238.17	15266000	22	102	NbD030400.1;NbD033288.1;NbE03054978.1	NbD030400.1	1552
16.6306	16.7512	16.5415	16.9394	16.9235	17.0257				-1	7	4	3	25.8	17.2	10.3	46.562	0	245.8	3017100	19	48	NbE03054971.1;NbD030453.1	NbE03054971.1;NbD030453.1	1553
16.2189	16.2131	NaN	NaN	15.8306	15.9716				-1	5	5	2	20.3	20.3	6.9	31.856	0	69.592	992710	16	16	NbD030679.1;NbD030590.1	NbD030679.1;NbD030590.1	1560
15.7917	15.5783	15.7595	14.6426	NaN	NaN				-1	7	7	7	16.6	16.6	16.6	86.043	0	84.055	1073600	41	28	NbE03059857.1;NbD044251.1;NbD030619.1	NbE03059857.1;NbD044251.1;NbD030619.1	1562
15.9092	16.5372	NaN	16.3281	16.4638	16.3603				-1	4	4	4	16.7	16.7	16.7	37.078	0	55.93	1767600	15	30	NbE05063558.1;NbD030755.1;NbD031414.1	NbE05063558.1;NbD030755.1;NbD031414.1	1564
NaN	NaN	NaN	14.5574	14.727	14.6906				-1	2	2	2	4.3	4.3	4.3	77.245	0	21.2	270300	40	12	NbD030764.1	NbD030764.1	1565
NaN	NaN	NaN	16.9319	16.8963	17.0129				-1	23	9	9	20.5	11	11	193.07	0	231.76	2763900	86	39	NbE03060074.1;NbD030848.1	NbE03060074.1;NbD030848.1	1567
17.5673	NaN	18.1845	17.8563	17.7143	NaN				-1	3	3	2	14.9	14.9	5.6	28.687	0	45.157	3872600	12	19	NbD030870.1	NbD030870.1	1568
19.4274	19.6254	19.2877	18.2179	18.1439	18.3875				-1	40	11	4	45.6	16.5	2.6	80.18	0	243.74	11691000	34	109	NbD030896.1	NbD030896.1	1570
16.6682	16.3166	16.0709	16.4736	16.4154	16.3936				-1	7	7	2	21.6	21.6	5.3	44.56	0	72.662	1922000	23	31	NbE03060148.1;NbD041326.1;NbD030921.1;NbD051888.1	NbE03060148.1;NbD041326.1;NbD030921.1;NbD051888.1	1572
NaN	NaN	NaN	16.1365	16.194	16.1789				-1	25	6	0	44.6	14.1	0	70.529	0	74.783	2544600	46	41	NbD030932.1	NbD030932.1	1573
15.0408	15.274	NaN	16.24	16.0588	16.174				-1	3	3	3	9.7	9.7	9.7	58.566	0	55.693	1570300	23	24	NbD049707.1;NbE05065391.1;NbD030942.1	NbD049707.1;NbE05065391.1;NbD030942.1	1574
16.6334	16.6203	16.6582	16.3655	16.0912	16.045				-1	7	7	3	66.1	66.1	23.2	12.484	0	63.606	2170700	8	32	NbD030965.1;NbE03061709.1;NbE03062199.1;NbE44070162.1;NbD045854.1;NbD020959.1	NbD030965.1;NbE03061709.1	1576
NaN	NaN	NaN	16.2037	16.3457	16.4177				-1	3	3	3	3.6	3.6	3.6	135.28	0	30.465	780440	61	12	NbD042148.1;NbD031067.1	NbD042148.1;NbD031067.1	1580
16.6774	NaN	16.7219	NaN	NaN	16.9342				-1	3	3	3	26.7	26.7	26.7	22.98	0	63.542	1831200	10	15	NbD031170.1;NbD024331.1	NbD031170.1;NbD024331.1	1583
17.0817	16.9435	17.5955	16.7283	16.7972	16.7303				-1	14	13	12	30.3	28.1	27.5	55.225	0	190.6	4644500	29	62	NbD031353.1;NbD037953.1;NbD007099.1	NbD031353.1;NbD037953.1	1586
19.067	18.9981	19.303	18.779	18.8084	18.7296				-1	15	15	15	43.5	43.5	43.5	59.81	0	295.04	20564000	30	164	NbD031394.1;NbD027714.1;NbE03056541.1;NbD048341.1;NbD011647.1;NbD020817.1	NbD031394.1;NbD027714.1;NbE03056541.1;NbD048341.1;NbD011647.1;NbD020817.1	1587
15.8233	15.8628	15.3825	16.2108	16.2856	16.2358				-1	12	12	5	19.2	19.2	10.3	97.953	0	159.47	3092100	49	60	NbE03054774.1;NbD031396.1	NbE03054774.1;NbD031396.1	1588
16.217	16.3399	16.1128	16.9608	16.9057	16.8331				-1	6	6	6	7.9	7.9	7.9	99.849	0	94.457	2855000	44	51	NbD043174.1;NbD031427.1	NbD043174.1;NbD031427.1	1589
17.9032	17.886	17.64	18.2378	18.3949	18.2283				-1	3	3	3	13.5	13.5	13.5	52.86	0	31.229	2766400	27	20	NbD052167.1;NbD031440.1	NbD052167.1;NbD031440.1	1590
NaN	NaN	NaN	15.7996	15.8716	15.8305				-1	1	1	1	3.7	3.7	3.7	42.52	0	20.145	774990	22	14	NbD031450.1	NbD031450.1	1592
16.1932	15.8384	16.156	17.0126	17.1208	17.1176				-1	11	11	3	9.9	9.9	2.7	123.06	0	236.58	4776200	60	62	NbE05065387.1;NbD031547.1	NbE05065387.1;NbD031547.1	1595
NaN	16.2572	NaN	17.7631	17.8732	17.9202				-1	6	6	6	16	16	16	65.329	0	113.1	3549200	26	39	NbD031876.1;NbE03053928.1;NbD021838.1	NbD031876.1;NbE03053928.1	1600
NaN	NaN	NaN	17.5032	17.6916	17.6321				-1	9	2	2	27.2	8	8	29.77	0	41.676	2228200	16	21	NbD038896.1;NbD031906.1	NbD038896.1;NbD031906.1	1601
14.8275	14.6481	14.9566	14.9333	14.9902	14.8846				-1	2	2	2	17.3	17.3	17.3	22.519	0	22.885	929530	13	27	NbD031933.1;NbD025768.1	NbD031933.1;NbD025768.1	1603
NaN	NaN	NaN	14.6379	15.0108	15.1054				-1	5	5	2	28.1	28.1	16.2	27.695	0	40.281	586710	16	17	NbD031941.1;NbD014011.1	NbD031941.1	1604
17.0527	17.0342	17.0782	16.6132	16.4799	16.5787				-1	5	5	5	21.8	21.8	21.8	32.823	0	67.163	1622600	19	24	NbD042629.1;NbD031945.1	NbD042629.1;NbD031945.1	1605
15.4469	NaN	NaN	15.8912	15.9725	15.8238				-1	6	6	6	29.4	29.4	29.4	36.937	0	55.7	1580300	18	28	NbD032065.1;NbD007410.1	NbD032065.1;NbD007410.1	1610
20.0234	20.1209	19.8984	19.8277	19.8189	19.7506				-1	30	30	1	45.6	45.6	4.7	42.714	0	323.31	78798000	24	285	NbD032270.1	NbD032270.1	1613
16.9081	16.8994	16.8062	17.5127	17.6514	17.5073				-1	3	3	3	9	9	9	34.3	0	173.5	2172800	11	23	NbD052062.1;NbD032282.1	NbD052062.1;NbD032282.1	1614
NaN	NaN	NaN	15.1437	15.0967	15.094				-1	1	1	1	1.2	1.2	1.2	105.93	0.0014025	7.5787	528270	56	14	NbD032286.1	NbD032286.1	1615
15.5006	15.5534	15.4987	15.7981	15.795	15.8397				-1	8	8	4	30.8	30.8	16.6	41.44	0	68.13	1661700	20	38	NbD032343.1;NbE03055419.1;NbD036138.1;NbD025641.1	NbD032343.1	1617
18.2807	18.4053	18.1792	18.4337	18.3934	18.2383				-1	15	4	4	32.3	15.2	15.2	46.783	0	175.91	7564000	24	37	NbD032401.1	NbD032401.1	1621
16.0089	16.0194	16.1287	16.0018	16.1452	16.1254				-1	4	4	4	9.7	9.7	9.7	66.383	0	36.27	1958800	37	30	NbD032404.1;NbE44071324.1;NbD023587.1	NbD032404.1;NbE44071324.1;NbD023587.1	1622
15.5764	15.7525	15.9497	15.0392	15.1807	15.0432				-1	5	5	5	14.6	14.6	14.6	36.046	0	42.382	973040	22	23	NbD032406.1	NbD032406.1	1623
18.0562	17.9773	17.8378	17.906	17.9915	17.9151				-1	23	16	1	29.2	26.7	5.3	47.923	0	323.31	8299300	27	87	NbD032435.1	NbD032435.1	1624
19.19	19.1945	19.0598	18.7373	18.7455	18.7906				-1	7	7	1	26.5	26.5	3.2	53.412	0	174.53	11416000	25	83	NbD032556.1	NbD032556.1	1630
16.366	15.9759	16.1401	15.8037	15.8613	15.8205				-1	6	6	2	29.1	29.1	11.8	22.666	0	55.655	1362500	9	28	NbD034965.1;NbD032589.1	NbD034965.1;NbD032589.1	1633
NaN	NaN	15.3354	14.8836	14.569	NaN				-1	2	2	2	6.5	6.5	6.5	48.027	0	15.085	349610	20	11	NbD032591.1;NbE03053968.1;NbD041670.1;NbD023620.1;NbD044139.1;NbD010514.1	NbD032591.1;NbE03053968.1;NbD041670.1;NbD023620.1;NbD044139.1;NbD010514.1	1634
17.048	17.4183	17.2579	16.988	16.9751	16.8959				-1	12	12	9	30.6	30.6	22	54.4	0	304.22	5872200	23	89	NbD032603.1	NbD032603.1	1635
20.529	20.4371	20.651	20.4341	20.4882	20.4565				-1	24	24	18	78.7	78.7	64.5	17.003	0	323.31	105460000	12	260	NbD032611.1;NbE44073039.1;NbD026843.1;NbD000188.1;NbE03061933.1;NbD035940.1	NbD032611.1;NbE44073039.1;NbD026843.1	1637
16.196	NaN	NaN	16.9166	16.8669	16.8188				-1	3	3	3	4.1	4.1	4.1	86.137	0	65.566	1488400	40	23	NbD032620.1	NbD032620.1	1639
15.9333	15.3433	15.6488	16.0249	16.3604	15.9584				-1	5	5	5	20.8	20.8	20.8	41.784	0	58.611	1153900	21	22	NbD032653.1;NbE05065913.1;NbD026243.1;NbE44069512.1;NbD034138.1	NbD032653.1;NbE05065913.1;NbD026243.1	1642
15.5889	15.8534	15.6892	16.1389	16.2395	16.0144				-1	9	9	9	12.7	12.7	12.7	95.914	0	76.1	1731900	48	44	NbE03056313.1;NbD052069.1;NbD032680.1	NbE03056313.1;NbD052069.1;NbD032680.1	1645
16.166	16.1909	16.3673	16.4867	16.7249	16.7568				-1	34	17	5	43.9	23.3	9	69.311	0	244.2	5064400	31	93	NbD032697.1;NbE03057177.1	NbD032697.1;NbE03057177.1	1646
16.3495	16.2757	16.5079	17.0197	17.0813	17.0311				-1	3	3	3	6.1	6.1	6.1	52.567	0	61.549	2438200	24	19	NbD032700.1	NbD032700.1	1647
19.5969	19.4026	19.8329	19.0548	19.1513	18.8187				-1	32	14	0	55.7	32	0	48.525	0	323.31	21635000	21	159	NbD032982.1;NbD042270.1	NbD032982.1;NbD042270.1	1658
18.2375	18.2516	17.9103	18.1971	18.2961	18.3254				-1	11	11	11	38.3	38.3	38.3	22.105	0	323.31	7881700	11	72	NbE05065213.1;NbD033086.1;NbE03060805.1	NbE05065213.1;NbD033086.1;NbE03060805.1	1661
19.0509	19.223	18.9893	17.8464	17.8733	17.8229				-1	37	8	3	46	8.2	2.6	70.894	0	166.12	8385000	37	54	NbD033096.1	NbD033096.1	1663
16.2261	16.5493	16.4089	NaN	NaN	NaN				-1	25	3	3	69.1	4.3	4.3	47.836	0	19.232	752420	23	12	NbD033120.1	NbD033120.1	1664
15.7328	16.0531	15.6326	NaN	15.6084	15.8717				-1	4	4	4	11.4	11.4	11.4	51.399	0	28.804	861300	23	18	NbD033238.1	NbD033238.1	1667
16.7738	16.682	16.7277	16.6936	16.7066	16.7157				-1	14	3	3	36	7.1	7.1	51.938	0	104.2	1898200	27	31	NbD044987.1;NbD033314.1	NbD044987.1;NbD033314.1	1669
16.3363	16.5712	16.282	15.1948	14.8974	14.9395				-1	3	3	3	18.9	18.9	18.9	44.723	0	31.451	700000	14	15	NbD033329.1;NbE03059003.1;NbD014909.1;NbE03055025.1	NbD033329.1;NbE03059003.1;NbD014909.1;NbE03055025.1	1671
NaN	NaN	14.9801	15.8135	16.0388	15.9826				-1	6	1	1	16.7	5.4	5.4	66.247	0	22.214	1474300	30	15	NbD033387.1	NbD033387.1	1674
NaN	NaN	NaN	14.4651	14.4358	14.4751				-1	4	4	2	6.4	6.4	3.3	74.855	0	62.306	291600	22	11	NbD033394.1	NbD033394.1	1675
NaN	NaN	NaN	14.6856	14.9126	14.832				-1	1	1	1	7	7	7	38.961	0	60.269	350480	13	11	NbE05067815.1;NbD033395.1	NbE05067815.1;NbD033395.1	1676
11.9112	NaN	NaN	16.3922	17.0151	17.191				-1	21	13	4	34.9	22.6	4.7	72.9	0	323.31	7594900	37	122	NbD033440.1	NbD033440.1	1679
19.5296	19.3926	19.1873	19.7069	19.593	19.668				-1	13	13	13	14.1	14.1	14.1	122.72	0	308.03	13797000	56	76	NbD033492.1;NbE05067284.1;NbE05067285.1	NbD033492.1;NbE05067284.1;NbE05067285.1	1680
20.3466	20.5197	20.4043	19.9632	19.9044	19.9307				-1	24	11	1	50	25.5	3.8	42.745	0	323.31	26136000	21	110	NbD033628.1	NbD033628.1	1687
16.0542	16.3957	16.6117	15.9824	15.9219	15.9392				-1	7	7	7	10.7	10.7	10.7	124.9	0	133.59	1201300	52	28	NbD033657.1;NbD048406.1	NbD033657.1;NbD048406.1	1690
15.0549	15.0755	NaN	16.1813	16.1635	16.2321				-1	2	2	2	7.7	7.7	7.7	64.32	0	53.385	667480	29	14	NbD033669.1;NbE03056582.1;NbD041174.1	NbD033669.1;NbE03056582.1;NbD041174.1	1691
18.6296	18.338	18.75	17.9619	18.038	17.7989				-1	3	3	3	5.4	5.4	5.4	66.676	0	88.193	4468600	30	31	NbE44072718.1;NbD033674.1	NbE44072718.1;NbD033674.1	1692
19.6947	19.7406	19.5078	19.7759	19.7165	19.8318				-1	9	9	4	29.4	29.4	12.5	38.07	0	236.69	14567000	20	75	NbD034030.1;NbD000335.1	NbD034030.1	1700
14.8844	14.9413	14.4129	14.3358	NaN	NaN				-1	2	2	2	22	22	22	23.587	0	28.011	231950	13	11	NbD034130.1;NbD036526.1	NbD034130.1;NbD036526.1	1703
14.6964	14.6679	14.0536	15.4536	15.6413	15.6267				-1	3	3	3	13.6	13.6	13.6	38.727	0	75.598	1164000	14	27	NbD034166.1;NbD002181.1	NbD034166.1;NbD002181.1	1705
16.5415	16.7662	16.4918	16.505	16.4767	16.461				-1	3	3	1	52	52	24	11.297	0	105.08	1949900	6	28	NbD034176.1	NbD034176.1	1706
NaN	NaN	NaN	15.0173	15.0215	15.1494				-1	2	2	2	6.7	6.7	6.7	55.043	0	16.596	320560	27	11	NbD034190.1	NbD034190.1	1709
17.1368	17.364	17.4864	18.2624	18.2094	18.3878				-1	8	8	3	21.5	21.5	10.2	66.2	0	107.59	6392100	30	47	NbD034251.1	NbD034251.1	1713
15.8412	16.0718	16.0411	16.3306	16.3434	16.3567				-1	9	9	2	31.6	31.6	6.4	49.216	0	103.24	1677900	29	41	NbD034262.1	NbD034262.1	1714
16.0893	16.1115	16.2487	NaN	NaN	NaN				-1	6	6	2	46.2	46.2	13.8	16.264	0	35.276	767880	8	16	NbD034351.1;NbD034350.1	NbD034351.1;NbD034350.1	1716
17.5663	17.7651	17.5587	17.7713	17.7234	17.7336				-1	24	24	8	61.4	61.4	21.1	61.059	0	323.31	14003000	34	186	NbD034490.1	NbD034490.1	1722
18.8916	18.4358	18.3987	NaN	NaN	NaN				-1	3	3	3	17.2	17.2	17.2	11.235	0	28.444	2440000	5	13	NbD034730.1	NbD034730.1	1730
17.6868	17.7665	17.0245	16.7632	16.9868	17.4423				-1	17	2	2	34.5	5.1	5.1	67.129	0	39.825	2273500	33	22	NbD034758.1	NbD034758.1	1732
18.2093	18.2107	18.1756	18.2484	18.2016	18.2759				-1	11	11	7	57	57	39.6	27.121	0	157.71	5955500	16	79	NbD034762.1;NbD051264.1	NbD034762.1	1733
NaN	NaN	NaN	14.8242	14.8552	14.923				-1	4	4	3	17.8	17.8	14.7	43.521	0	75.626	401770	21	12	NbD034833.1;NbE44071419.1	NbD034833.1;NbE44071419.1	1735
17.654	17.5966	17.523	17.3906	17.4747	17.4692				-1	30	30	4	38	38	5	102.63	0	316.27	11012000	47	175	NbE44071929.1;NbD034912.1;NbE44071928.1;NbD037217.1;NbE44069944.1	NbE44071929.1;NbD034912.1;NbE44071928.1;NbD037217.1;NbE44069944.1	1737
NaN	NaN	NaN	17.1143	17.1062	17.1695				-1	7	7	4	14.9	14.9	8.7	52.337	0	158.21	2629500	16	41	NbE03060478.1;NbD034991.1	NbE03060478.1;NbD034991.1	1739
20.6763	20.6638	20.4258	20.9513	21.0048	20.7911				-1	11	7	3	47.1	44.3	17.6	28.765	0	97.725	20524000	15	34	NbD035150.1;NbE03062133.1	NbD035150.1	1743
15.3265	15.1659	15.321	15.6587	15.495	15.5366				-1	5	5	5	23.6	23.6	23.6	17.739	0	46.434	838960	7	24	NbD035155.1;NbD049242.1;NbE44073052.1	NbD035155.1;NbD049242.1;NbE44073052.1	1744
16.0325	15.0728	NaN	14.8849	14.8124	14.8148				-1	3	3	3	16.5	16.5	16.5	23.403	0	46.352	441470	13	15	NbD035195.1;NbD003080.1	NbD035195.1	1746
17.1954	17.0571	17.2492	17.1254	17.0156	17.0828				-1	9	9	9	45.3	45.3	45.3	30.071	0	179.64	3827100	15	61	NbD035250.1;NbE03061717.1;NbE03054332.1;NbD016966.1	NbD035250.1;NbE03061717.1	1747
15.6788	15.289	15.2905	16.3534	16.1428	16.3321				-1	9	9	9	34	34	34	33.817	0	91.591	3237100	17	57	NbE03054354.1;NbD035284.1;NbD016501.1;NbD021450.1;NbD040807.1	NbE03054354.1;NbD035284.1	1749
NaN	NaN	NaN	17.2749	17.3133	17.3349				-1	3	3	3	8.8	8.8	8.8	56.443	0	86.376	1753700	25	17	NbE03055354.1;NbD035299.1;NbD050759.1;NbD015477.1	NbE03055354.1;NbD035299.1;NbD050759.1;NbD015477.1	1750
NaN	NaN	NaN	14.8503	14.5295	14.7792				-1	6	6	2	16.3	16.3	6.9	70.23	0	89.215	531240	36	16	NbD035635.1	NbD035635.1	1759
17.527	17.1065	17.5853	17.3031	17.3738	17.241				-1	8	8	1	26.3	26.3	7.4	42.426	0	195.19	6594800	23	61	NbE03058615.1;NbD035651.1	NbE03058615.1;NbD035651.1	1761
19.0002	19.0854	18.6787	18.0658	18.2202	18.1987				-1	12	12	12	16	16	16	74.283	0	137.17	8327100	39	61	NbD035774.1;NbD029400.1	NbD035774.1	1764
17.6518	17.6289	17.7767	18.1836	18.1645	18.2149				-1	8	5	4	25.9	19.9	19.9	28.627	0	93.931	8082000	13	64	NbD049018.1;NbD035868.1	NbD049018.1;NbD035868.1	1766
16.2975	16.0733	15.9912	16.7757	16.8347	16.8533				-1	5	5	5	10	10	10	50.155	0	75.816	2017600	19	33	NbD035885.1;NbD005366.1	NbD035885.1	1767
14.8397	14.5775	14.3104	18.6754	18.5904	18.6347				-1	23	22	13	14	13.5	9.4	188.16	0	261.08	11495000	86	115	NbD035909.1;NbE44074431.1	NbD035909.1;NbE44074431.1	1768
21.7773	21.6994	21.3624	21.7923	21.6064	21.7408				-1	17	17	2	63.2	63.2	14.8	27.406	0	323.31	133070000	13	375	NbD035922.1;NbD007480.1	NbD035922.1	1769
18.3495	18.1271	18.088	18.2345	18.34	18.2129				-1	4	4	3	23.7	23.7	17	25.202	0	72.94	7182900	14	49	NbD036019.1	NbD036019.1	1772
NaN	NaN	NaN	15.1449	14.8745	14.9824				-1	16	3	3	17.4	5.3	5.3	136.97	0	46.285	567730	66	17	NbD036033.1	NbD036033.1	1774
18.5192	18.5533	18.8	17.904	17.8777	17.863				-1	17	3	3	31.9	7.1	7.1	79.461	0	47.731	4687700	32	23	NbD036057.1	NbD036057.1	1775
15.4724	15.4023	15.5062	15.8692	15.9452	16.1348				-1	5	5	2	9.8	9.8	3.5	92.453	0	105.66	1399200	49	32	NbE03056530.1;NbD036129.1	NbE03056530.1;NbD036129.1	1778
NaN	NaN	NaN	15.5729	15.5702	15.6292				-1	6	3	3	21.4	12.6	12.6	52.053	0	55.243	1121600	19	23	NbD050542.1;NbD036339.1	NbD050542.1;NbD036339.1	1782
NaN	NaN	NaN	16.3234	16.0873	16.1584				-1	10	2	2	25	4.8	4.8	70.956	0	26.277	551270	29	11	NbD036341.1	NbD036341.1	1783
17.4011	17.1655	17.2168	17.5397	17.3212	17.1854				-1	2	2	2	19.8	19.8	19.8	27.782	0	136.34	2281100	14	24	NbD036346.1;NbD011439.1;NbD050070.1;NbD027109.1	NbD036346.1;NbD011439.1;NbD050070.1;NbD027109.1	1784
16.7916	17.1016	17.1574	16.1732	16.1618	15.9875				-1	4	4	4	16.4	16.4	16.4	45.293	0	51.235	1602200	19	26	NbD036388.1	NbD036388.1	1786
NaN	15.0542	15.2103	16.3761	16.4573	16.4048				-1	5	5	1	9.2	9.2	2.1	75.719	0	57.732	1300100	33	28	NbD036393.1	NbD036393.1	1788
NaN	NaN	NaN	17.3269	17.2763	17.1535				-1	9	9	4	49.2	49.2	25.6	28.095	0	188.29	3000300	14	34	NbD036440.1;NbD046539.1	NbD036440.1;NbD046539.1	1789
NaN	NaN	14.2062	14.8201	15.0232	15.0772				-1	2	2	2	6.2	6.2	6.2	33.684	0	19.232	459080	20	17	NbD036664.1	NbD036664.1	1797
NaN	NaN	NaN	16.2476	16.2386	16.4522				-1	7	7	7	10.7	10.7	10.7	76.965	0	88.722	1199400	42	23	NbD036879.1;NbD051964.1;NbD017731.1	NbD036879.1	1809
17.7898	17.7883	17.8292	18.9701	18.7866	18.7996				-1	3	3	2	19.4	19.4	13.5	28.639	0	34.825	4881500	17	25	NbD036935.1	NbD036935.1	1812
16.3586	16.3574	NaN	16.7942	16.7027	16.7532				-1	5	5	5	5	5	5	180.14	0	76.493	2076700	70	35	NbD036968.1	NbD036968.1	1814
NaN	NaN	NaN	15.0811	15.2159	15.1579				-1	2	2	2	6.2	6.2	6.2	63.433	0	16.455	558270	32	16	NbD037085.1	NbD037085.1	1818
14.8171	15.1405	14.6763	14.7228	NaN	NaN				-1	16	1	1	58	9.6	9.6	27.407	0.0010741	10.412	272340	13	10	NbD037141.1	NbD037141.1	1820
16.5046	16.2354	17.155	16.1028	16.5496	16.1052				-1	4	4	4	25.3	25.3	25.3	33.835	0	52.655	1539600	16	19	NbD037307.1	NbD037307.1	1821
15.117	15.0145	NaN	NaN	14.9131	NaN				-1	2	2	1	43.4	43.4	16.2	10.27	0	42.752	363870	5	12	NbD037386.1	NbD037386.1	1822
15.8155	15.9937	16.0221	17.8818	18.2628	17.8436				-1	14	14	14	12	12	12	118.81	0	185.76	7137900	49	74	NbD048716.1;NbD037391.1;NbE44073564.1;NbE05068163.1;NbD046159.1	NbD048716.1;NbD037391.1;NbE44073564.1	1823
NaN	NaN	NaN	15.0228	15.0516	15.0237				-1	11	3	3	14	3.9	3.9	133.6	0	26.44	344190	64	10	NbD037434.1;NbE05064271.1	NbD037434.1;NbE05064271.1	1826
21.7352	21.7972	21.9148	21.8776	21.844	21.8094				-1	12	11	2	36.7	36.7	12.6	39.89	0	323.31	66749000	21	101	NbD037457.1	NbD037457.1	1829
17.7431	17.6884	17.4359	18.3983	18.3516	18.4657				-1	17	17	6	27.8	27.8	14.8	83.299	0	201.18	11334000	46	99	NbD037529.1;NbE05063298.1	NbD037529.1;NbE05063298.1	1831
18.7622	18.759	18.6331	18.6158	18.5114	18.4761				-1	25	25	3	67.3	67.3	6.5	47.87	0	323.31	19024000	23	182	NbD037657.1;NbD042442.1	NbD037657.1	1835
17.4584	17.3047	NaN	16.2795	NaN	NaN				-1	3	3	3	23.4	23.4	23.4	28.717	0	121.72	822150	15	13	NbD050241.1;NbD037884.1	NbD050241.1;NbD037884.1	1844
NaN	NaN	NaN	15.2206	15.1252	15.1958				-1	4	4	4	7.5	7.5	7.5	94.161	0	60.399	426400	35	12	NbD037970.1	NbD037970.1	1846
20.0046	19.7875	19.6091	19.2233	19.3762	19.4508				-1	8	8	3	60.4	60.4	20.7	18.445	0	144.44	13633000	12	61	NbD038044.1	NbD038044.1	1848
17.4224	17.7242	16.3595	17.5031	17.6823	17.8336				-1	10	10	10	39.1	39.1	39.1	41.552	0	143.76	4248800	21	60	NbD038085.1;NbE05064560.1;NbE05063200.1;NbD035718.1	NbD038085.1;NbE05064560.1;NbE05063200.1;NbD035718.1	1851
18.5393	18.5384	18.4468	18.55	18.4963	18.6354				-1	15	15	2	27.5	27.5	4.1	75.818	0	323.31	14637000	37	109	NbE03053451.1;NbD038127.1	NbE03053451.1;NbD038127.1	1854
15.4868	15.2104	15.2054	NaN	NaN	NaN				-1	4	4	2	17.6	17.6	9.4	35.368	0	32.964	684790	14	20	NbE05066728.1;NbD038147.1	NbE05066728.1;NbD038147.1	1855
NaN	NaN	NaN	17.8898	18.0065	18.1072				-1	2	2	1	6.3	6.3	3.7	49.568	0	39.436	3763700	16	23	NbD040415.1;NbD038247.1;NbE44069407.1;NbE03058410.1;NbE03054217.1;NbD043709.1	NbD040415.1;NbD038247.1;NbE44069407.1;NbE03058410.1;NbE03054217.1;NbD043709.1	1861
18.2677	18.4063	17.9619	17.6031	17.5367	17.6139				-1	4	4	4	12.3	12.3	12.3	47.587	0	49.803	4486500	25	29	NbE05066261.1;NbD038254.1;NbE03054200.1	NbE05066261.1;NbD038254.1;NbE03054200.1	1862
20.3555	20.6537	20.5981	20.2638	20.2563	20.2177				-1	7	7	7	34.3	34.3	34.3	25.329	0	253.45	41329000	10	112	NbD038259.1	NbD038259.1	1863
16.0534	NaN	16.6208	16.1183	15.903	15.7352				-1	1	1	1	9	9	9	21.924	0	27.283	1377900	11	22	NbD049994.1;NbE03060510.1;NbD038490.1	NbD049994.1;NbE03060510.1;NbD038490.1	1867
16.753	17.1005	15.9442	16.5125	16.2566	16.3282				-1	9	5	5	43.8	29.2	29.2	28.766	0	75.097	1593200	14	27	NbD038602.1;NbD004679.1;REV__NbD048599.1;REV__NbD030177.1	NbD038602.1	1872
17.9258	17.8589	18.1666	18.4137	18.3222	18.1902				-1	3	2	2	15.2	8.5	8.5	25.176	0	85.793	7558300	14	32	NbD038663.1	NbD038663.1	1873
NaN	NaN	16.2063	16.7025	16.6479	16.7934				-1	6	5	1	24.7	24.7	6.6	31.601	0	73.468	2084000	18	31	NbD038738.1	NbD038738.1	1876
16.3267	16.2419	16.2992	16.2923	16.419	16.4891				-1	5	5	2	11.8	11.8	5.5	42.272	0	62.57	2531800	26	39	NbD038769.1	NbD038769.1	1877
14.6826	NaN	14.5808	14.4729	14.596	14.6793				-1	2	2	2	5.5	5.5	5.5	31.547	0	30.514	717120	10	22	NbD038785.1	NbD038785.1	1879
15.0678	NaN	15.2531	14.9869	15.0975	15.0809				-1	4	4	4	14.8	14.8	14.8	48.023	0	39.638	946260	23	28	NbD038801.1	NbD038801.1	1881
17.1299	15.0318	15.7528	17.876	17.8233	17.9161				-1	8	8	5	31.9	31.9	24.2	35.198	0	173.04	4927900	20	43	NbD038829.1;NbE44069782.1	NbD038829.1	1882
22.0263	21.8465	21.7495	21.6548	21.4609	21.6769				-1	11	11	1	34.6	34.6	2.7	56.459	0	323.31	46272000	22	69	NbD038858.1	NbD038858.1	1884
NaN	17.0429	NaN	NaN	17.0858	17.3151				-1	5	3	3	12.6	8.9	8.9	62.959	0	37.966	1718000	28	15	NbD038876.1;NbE03061978.1;NbE44071134.1	NbD038876.1;NbE03061978.1;NbE44071134.1	1885
16.0986	15.9824	15.8094	16.0517	16.1814	16.0859				-1	7	7	7	16.2	16.2	16.2	67.376	0	93.99	1513600	28	30	NbD038945.1;NbE03055088.1;NbD024401.1	NbD038945.1;NbE03055088.1;NbD024401.1	1887
17.6885	17.9871	17.6041	17.0048	16.9666	17.0374				-1	7	7	7	18	18	18	48.416	0	112.89	3858400	21	57	NbD040189.1;NbD038950.1;NbD050709.1;NbD011358.1	NbD040189.1;NbD038950.1;NbD050709.1	1888
15.4844	15.5767	15.5833	16.7381	16.7478	16.7979				-1	7	7	7	6.8	6.8	6.8	121.79	0	91.522	2955700	50	67	NbD040723.1;NbD038952.1;NbE03060405.1;NbD023008.1	NbD040723.1;NbD038952.1	1889
16.4767	16.4839	NaN	NaN	15.3397	15.0996				-1	2	2	2	24.1	24.1	24.1	15.122	0	22.685	504950	8	12	NbD039827.1;NbD039078.1	NbD039827.1;NbD039078.1	1890
NaN	NaN	NaN	15.2318	15.0722	15.2658				-1	2	2	2	5.8	5.8	5.8	59.042	0	20.677	282430	30	8	NbD039121.1	NbD039121.1	1892
15.3964	15.408	15.0415	15.9905	15.7883	16.0334				-1	7	5	5	27.8	16.9	16.9	39.197	0	120.11	896230	15	28	NbD039123.1	NbD039123.1	1893
16.4182	16.5583	16.3603	16.8931	16.9159	17.0027				-1	22	5	5	35.7	11.5	11.5	70.451	0	92.115	3287700	30	45	NbD039145.1	NbD039145.1	1894
NaN	15.3942	15.6785	17.6905	17.568	17.1272				-1	10	10	1	56.6	56.6	8.4	16.029	0	185.1	6720500	10	49	NbD039357.1;NbD039356.1	NbD039357.1;NbD039356.1	1903
NaN	NaN	NaN	16.0886	16.0983	16.0822				-1	10	10	7	16.4	16.4	13.6	99.626	0	96.562	2000100	43	32	NbD039406.1;NbE44071008.1	NbD039406.1;NbE44071008.1	1905
18.8707	18.8682	19.0872	19.5487	19.58	19.5735				-1	8	2	0	41.1	15.5	0	29.051	0	23.907	13546000	15	19	NbD039463.1;NbD002087.1;NbE05068863.1	NbD039463.1;NbD002087.1	1907
16.8177	16.7318	16.9698	16.3997	16.206	16.238				-1	10	10	10	44.4	44.4	44.4	41.716	0	200.58	2523000	23	39	NbD039485.1;NbD022460.1	NbD039485.1;NbD022460.1	1910
17.0991	17.1839	17.2872	18.6082	18.6045	18.705				-1	10	10	0	27.1	27.1	0	66.832	0	256.79	7532100	32	81	NbD039501.1	NbD039501.1	1911
15.4686	15.6512	15.6136	15.5636	15.4144	15.5451				-1	5	5	1	17.2	17.2	2.8	48.951	0	70.418	1149900	24	35	NbD039596.1	NbD039596.1	1913
16.9677	16.8395	16.3755	16.9096	16.8775	16.9653				-1	9	9	1	22	22	2.6	64.084	0	159.98	3773900	29	70	NbD039621.1	NbD039621.1	1915
15.208	15.522	14.9745	15.2025	15.0986	15.135				-1	8	8	8	44.8	44.8	44.8	28.574	0	71.229	872450	17	29	NbD039711.1;NbE44072319.1;NbD031052.1	NbD039711.1	1921
NaN	NaN	NaN	14.9908	14.8929	15.0911				-1	8	8	4	8.4	8.4	3.4	130.75	0	83.538	807140	63	24	NbD039722.1;NbE05063486.1;NbD030447.1	NbD039722.1;NbE05063486.1;NbD030447.1	1922
17.8777	17.8079	18.069	17.9849	17.6484	17.6655				-1	3	3	3	20.2	20.2	20.2	23.981	0	90.273	4190600	13	44	NbD039872.1;NbD030662.1	NbD039872.1;NbD030662.1	1927
17.3276	16.9898	NaN	15.1174	NaN	15.8756				-1	4	4	3	18.4	18.4	12.1	27.527	0	26.38	1923900	12	30	NbE03061776.1;NbD039901.1	NbE03061776.1;NbD039901.1	1928
17.9723	18.0495	17.6723	17.4902	17.2205	17.4157				-1	6	6	2	20.3	20.3	6.7	43.172	0	69.682	2828500	22	39	NbE03060269.1;NbD040004.1	NbE03060269.1;NbD040004.1	1932
NaN	NaN	NaN	18.5066	18.4084	19.1166				-1	13	6	6	18.8	13	13	108.15	0	72.159	3356100	55	31	NbD040020.1	NbD040020.1	1933
NaN	NaN	15.8289	NaN	16.8763	16.6989				-1	2	2	2	9.9	9.9	9.9	22.71	0	61.115	1348600	13	13	NbD043370.1;NbD040054.1	NbD043370.1;NbD040054.1	1936
NaN	15.2758	NaN	17.5153	17.5108	17.3255				-1	2	2	1	12.5	12.5	7.3	30.991	0	37.609	1961700	17	14	NbD040165.1	NbD040165.1	1939
14.9155	15.1472	NaN	14.7298	NaN	NaN				-1	2	2	2	14	14	14	29.256	0	15.715	454750	16	14	NbD045967.1;NbD040286.1	NbD045967.1;NbD040286.1	1941
17.0601	17.2493	16.7702	17.0627	17.0576	17.1968				-1	14	14	7	39.3	39.3	17.2	49.825	0	189.93	4046600	28	68	NbD040581.1	NbD040581.1	1947
15.6837	15.7293	NaN	16.0694	16.088	16.0779				-1	3	3	1	26.2	26.2	8.5	14.772	0	22.544	1275300	8	23	NbD040744.1	NbD040744.1	1950
15.7802	15.7764	15.8804	16.2735	16.5655	16.1879				-1	4	4	4	16.7	16.7	16.7	41.402	0	29.858	996540	17	20	NbD040783.1	NbD040783.1	1951
NaN	NaN	14.9897	16.1916	16.183	15.8612				-1	5	5	4	12.2	12.2	10	94.115	0	65.32	1134900	40	27	NbD040833.1;NbE03056374.1;NbD013711.1	NbD040833.1;NbE03056374.1;NbD013711.1	1952
NaN	NaN	NaN	17.2708	17.3269	17.271				-1	8	5	5	14	10.7	10.7	88.739	0	78.591	1942200	36	17	NbE05065923.1;NbD040967.1	NbE05065923.1;NbD040967.1	1956
14.2682	NaN	NaN	14.1482	NaN	14.1426				-1	2	2	2	2.6	2.6	2.6	154.04	0	13.865	220890	66	10	NbD041005.1;NbE05064636.1;NbD003707.1	NbD041005.1;NbE05064636.1;NbD003707.1	1958
16.5725	16.6455	16.4779	16.3988	16.7393	16.5672				-1	5	5	5	13.4	13.4	13.4	26.342	0	68.708	1990300	16	30	NbD041017.1;NbE05068548.1	NbD041017.1	1959
18.2814	18.129	17.9971	17.665	17.4486	17.8818				-1	3	2	2	19.8	13.8	13.8	18.506	0	96.557	3355300	7	22	NbE44074385.1;NbD052623.1;NbD041039.1;NbE03061566.1	NbE44074385.1;NbD052623.1;NbD041039.1;NbE03061566.1	1960
NaN	15.3821	14.9821	15.9626	16.1329	16.1106				-1	3	3	1	8.7	8.7	8.7	25.151	0	107.16	1165300	10	27	NbD041230.1	NbD041230.1	1963
16.0604	NaN	NaN	15.9572	15.3488	15.8514				-1	3	3	3	13.2	13.2	13.2	55.211	0	36.746	902080	26	17	NbD041315.1;NbD034996.1;NbE03058706.1;NbD009908.1	NbD041315.1	1965
15.6503	15.2485	15.6764	16.471	16.4049	16.4092				-1	6	6	5	18.1	18.1	14.4	61.417	0	93.431	1193000	26	29	NbD041325.1	NbD041325.1	1966
18.1767	18.3175	18.0867	18.1153	18.0358	18.0983				-1	20	20	8	43.6	43.6	27.1	53.31	0	323.31	14605000	25	151	NbD041382.1;NbD051021.1	NbD041382.1	1968
NaN	NaN	NaN	16.5091	16.6112	16.6611				-1	7	7	2	11.4	11.4	4.7	78.581	0	63.213	1566000	33	22	NbD041400.1;NbE44074001.1;NbE05063700.1;NbE05066933.1	NbD041400.1;NbE44074001.1;NbE05063700.1	1969
NaN	16.8229	NaN	16.4959	16.359	16.4201				-1	3	3	3	19.5	19.5	19.5	24.917	0	35.435	1030500	13	17	NbD041402.1	NbD041402.1	1970
15.2449	NaN	15.4138	15.1319	15.0813	15.1453				-1	3	3	3	18.2	18.2	18.2	35.63	0	24.576	543480	17	17	NbD049285.1;NbD041451.1;NbD041839.1;NbD003856.1	NbD049285.1;NbD041451.1;NbD041839.1;NbD003856.1	1974
NaN	NaN	NaN	16.7985	16.6847	16.6102				-1	11	11	3	14.6	14.6	5.8	92.921	0	106.27	2783200	40	54	NbE05066340.1;NbD041659.1	NbE05066340.1;NbD041659.1	1979
19.1442	19.2473	19.0957	19.7405	19.842	19.788				-1	10	6	6	71.7	42	42	24.491	0	323.31	23738000	10	65	NbD041733.1	NbD041733.1	1981
15.9126	15.9038	15.6279	15.5807	15.4796	15.477				-1	2	2	2	6.4	6.4	6.4	47.115	0	19.397	584950	21	17	NbD041752.1	NbD041752.1	1982
15.0473	14.7583	NaN	15.9528	15.9166	15.9452				-1	4	4	4	9.8	9.8	9.8	73.341	0	102.57	1362100	16	25	NbD041947.1;NbD012457.1	NbD041947.1;NbD012457.1	1987
NaN	NaN	NaN	15.0211	15.185	15.4559				-1	3	3	3	26.8	26.8	26.8	13.319	0	131.68	561320	6	17	NbD042103.1;NbD008222.1	NbD042103.1	1991
18.5468	18.5203	18.2619	18.3911	18.2616	18.4032				-1	19	11	7	60.5	42.1	32.9	36.651	0	252.76	12439000	20	104	NbD042406.1;NbD033988.1	NbD042406.1;NbD033988.1	1997
19.185	19.2871	18.918	19.4831	19.3834	19.1769				-1	8	8	8	23.4	23.4	23.4	47.06	0	323.31	15964000	25	82	NbD042499.1;NbD051704.1;NbE44072658.1;NbD030814.1	NbD042499.1;NbD051704.1;NbE44072658.1	1998
NaN	16.5115	NaN	16.2759	NaN	16.0747				-1	2	2	2	13.7	13.7	13.7	22.986	0	47.985	944490	14	14	NbE44072897.1;NbD048990.1;NbE03060556.1;NbD042522.1;NbD006265.1	NbE44072897.1;NbD048990.1;NbE03060556.1;NbD042522.1;NbD006265.1	1999
NaN	NaN	NaN	16.1613	16.2689	16.0774				-1	5	5	2	13.5	13.5	6.2	59.351	0	83.527	1176600	35	21	NbE05066373.1;NbD042535.1;NbE44069436.1;NbD042714.1	NbE05066373.1;NbD042535.1;NbE44069436.1;NbD042714.1	2000
NaN	NaN	NaN	16.1646	16.2882	16.2988				-1	3	3	3	5.7	5.7	5.7	112.15	0	46.825	1048900	60	15	NbE03059461.1;NbD046938.1;NbE03054676.1;NbD042537.1	NbE03059461.1;NbD046938.1;NbE03054676.1;NbD042537.1	2001
19.1566	18.8514	19.1236	18.4447	18.5608	18.4198				-1	20	16	1	37.9	35.3	3.3	73.73	0	214.57	8026500	31	78	NbD042545.1;NbD027560.1	NbD042545.1;NbD027560.1	2002
20.4043	20.625	20.3057	20.7895	20.7024	20.5389				-1	14	14	3	29.3	29.3	7.6	49.279	0	323.31	62175000	25	205	NbD042613.1	NbD042613.1	2004
18.4238	18.4492	18.3845	19.0707	18.9157	19.0206				-1	13	11	5	44.8	32.3	10.8	30.527	0	242.81	12349000	16	92	NbD042666.1	NbD042666.1	2005
NaN	NaN	NaN	17.4116	17.3937	17.2766				-1	6	6	6	10	10	10	78.178	0	87.493	2166000	40	23	NbE03055894.1;NbD042712.1;NbE44069083.1;NbD026458.1	NbE03055894.1;NbD042712.1;NbE44069083.1;NbD026458.1	2006
NaN	NaN	NaN	15.5324	15.3549	15.3387				-1	8	8	8	11.5	11.5	11.5	143.74	0	63.128	936710	68	26	NbE03054883.1;NbD042744.1	NbE03054883.1;NbD042744.1	2010
15.2791	14.967	15.2991	16.3195	NaN	NaN				-1	3	3	1	10.4	10.4	3.4	65.27	0	62.338	971130	30	15	NbD042812.1	NbD042812.1	2013
21.7251	21.5487	21.7578	21.2648	21.1844	21.0071				-1	12	12	8	45.9	45.9	29	30.449	0	200.4	50973000	12	83	NbD042875.1	NbD042875.1	2016
19.028	18.981	19.0133	19.0328	19.0098	19.0514				-1	6	6	6	15.5	15.5	15.5	31.406	0	170.2	8766600	13	38	NbD042968.1	NbD042968.1	2019
17.2338	17.5428	17.2774	17.4195	17.6148	17.5473				-1	13	13	13	24.8	24.8	24.8	83.162	0	158.33	7473100	36	108	NbD042984.1;NbD000727.1	NbD042984.1	2020
18.2591	18.0891	18.3878	17.3981	17.6433	17.47				-1	13	13	5	59.9	59.9	23.3	25.959	0	198.73	7423200	13	79	NbD043166.1	NbD043166.1	2028
15.2414	15.4935	15.4272	14.8961	14.438	NaN				-1	3	3	3	10.4	10.4	10.4	65.736	0	37.186	685420	28	22	NbE05068512.1;NbD043315.1;NbD031005.1;NbD013047.1	NbE05068512.1;NbD043315.1	2030
NaN	NaN	NaN	13.562	13.6756	13.6934				-1	3	2	2	9.5	6.3	6.3	70.905	0	25.293	128960	23	10	NbD046435.1;NbD043319.1	NbD046435.1;NbD043319.1	2031
18.4016	18.3219	18.4749	18.2185	18.1681	18.1429				-1	35	35	5	61.1	61.1	11	63.115	0	323.31	16984000	35	193	NbD043334.1	NbD043334.1	2033
15.111	15.1445	15.0617	14.8416	15.11	15.1896				-1	3	3	1	13.4	13.4	5	50.327	0	48.656	734100	27	25	NbD043365.1	NbD043365.1	2034
NaN	NaN	NaN	14.8321	14.5398	14.6309				-1	3	3	2	13	13	12.3	32.86	0	22.479	242300	15	10	NbD043492.1	NbD043492.1	2039
18.808	18.7982	18.8144	18.6056	18.5565	18.5598				-1	13	13	2	39.4	39.4	5.3	38.549	0	323.31	12115000	22	102	NbD043546.1	NbD043546.1	2042
17.2051	17.5646	17.4295	17.7582	17.7796	NaN				-1	2	2	2	6	6	6	46.257	0	143.4	3408000	26	27	NbD043671.1	NbD043671.1	2046
NaN	NaN	NaN	15.4635	15.4984	15.6202				-1	3	3	3	11.2	11.2	11.2	45.875	0	32.641	754880	25	18	NbD051733.1;NbD043691.1;NbE05065307.1;NbE05066315.1	NbD051733.1;NbD043691.1	2047
14.8005	15.1455	NaN	15.1919	15.3955	15.4397				-1	3	3	2	10.6	10.6	8.8	52.488	0	37.935	680150	28	20	NbD043782.1;NbD045004.1	NbD043782.1;NbD045004.1	2051
NaN	14.6398	NaN	14.7908	14.6257	14.6143				-1	2	2	1	3.8	3.8	1.6	84.972	0	30.351	263350	40	9	NbD043790.1	NbD043790.1	2052
19.5826	19.0691	19.41	19.7741	19.6635	19.7647				-1	12	12	1	64.7	64.7	3.4	59.405	0	323.31	47846000	36	171	NbE44070628.1;NbD043965.1;NbD020023.1	NbE44070628.1;NbD043965.1;NbD020023.1	2059
21.5025	21.6358	21.2777	21.6614	21.7177	21.7316				-1	26	26	2	68.2	68.2	9.6	35.959	0	323.31	121330000	20	392	NbD044058.1	NbD044058.1	2065
16.6296	16.5337	16.8492	16.7325	16.5327	16.4735				-1	1	1	1	6.8	6.8	6.8	27.736	0	35.856	1505900	15	18	NbD044090.1	NbD044090.1	2068
17.2935	NaN	NaN	17.9284	18.0886	17.9077				-1	6	6	5	61.8	61.8	60	12.398	0	302.47	5638300	6	40	NbD049064.1;NbD044174.1	NbD049064.1;NbD044174.1	2071
20.2017	20.2286	20.2746	20.1478	20.2007	20.2342				-1	34	34	7	50	50	13.5	64.925	0	323.31	77977000	32	357	NbD044252.1	NbD044252.1	2072
17.4564	17.0672	17.3027	16.4049	16.3665	16.0862				-1	2	2	2	21.5	21.5	21.5	19.284	0	44.029	2488200	12	27	NbD044268.1;NbE44072467.1;NbD006582.1	NbD044268.1;NbE44072467.1;NbD006582.1	2075
15.9752	15.8277	15.824	16.6094	16.5139	16.4934				-1	10	4	1	20.7	12.8	4.7	77.784	0	186.52	1374000	40	30	NbD044387.1	NbD044387.1	2077
NaN	NaN	NaN	16.2363	16.3336	16.2578				-1	4	3	2	18.9	13.9	8.6	36.809	0	24.403	821400	17	13	NbD044403.1;NbE05067806.1	NbD044403.1;NbE05067806.1	2079
NaN	NaN	NaN	15.2588	15.1251	15.2337				-1	2	2	2	5.4	5.4	5.4	69.739	0	12.828	334640	28	9	NbD044489.1	NbD044489.1	2086
16.1655	16.2663	16.1819	16.1239	16.3233	16.3853				-1	4	4	4	13.5	13.5	13.5	52.798	0	60.028	1500500	18	25	NbD044570.1;NbE03053604.1;NbE03060176.1;NbD001336.1;NbD041922.1	NbD044570.1;NbE03053604.1;NbE03060176.1;NbD001336.1	2089
17.3926	17.0905	17.0904	17.2919	17.2082	17.259				-1	11	11	3	27.7	27.7	8.1	53.615	0	90.273	4583800	28	68	NbD044573.1;NbD042820.1;NbD047851.1;NbD042962.1	NbD044573.1;NbD042820.1	2090
NaN	NaN	NaN	16.4826	16.6602	16.6345				-1	11	10	10	11	10.2	10.2	144.05	0	125.47	1913900	55	35	NbD044609.1;NbE05063013.1;NbE44070943.1;NbD050310.1;NbD041688.1;NbD033593.1;NbD038763.1;NbE05063583.1;NbD018502.1;NbE44070154.1;NbE05064926.1;NbD013117.1;NbE03055146.1;NbE03055329.1;NbE44073746.1	NbD044609.1;NbE05063013.1	2092
18.9664	18.7287	19.0518	19.1429	18.9709	18.9754				-1	17	17	6	52.8	52.8	22.8	35.902	0	323.31	32273000	16	155	NbD044652.1	NbD044652.1	2095
18.3383	18.3716	18.4673	18.1064	18.4328	18.361				-1	36	16	2	43.9	22.1	4.4	84.519	0	323.31	10929000	41	94	NbD044911.1	NbD044911.1	2101
NaN	NaN	NaN	15.5253	15.4622	15.3847				-1	7	4	1	10.6	6.9	2.1	130.78	0	96.612	718010	61	19	NbE05067130.1;NbD045099.1	NbE05067130.1;NbD045099.1	2105
NaN	17.8393	17.1865	17.9929	17.7824	17.8785				-1	2	2	2	3.4	3.4	3.4	65.386	0	50.489	5156500	29	24	NbD045419.1	NbD045419.1	2116
NaN	NaN	NaN	15.0344	14.8888	14.9847				-1	3	3	1	9	9	2.6	61.116	0	21.546	296790	26	11	NbD045570.1	NbD045570.1	2121
16.737	16.5409	17.6178	17.2807	17.4243	17.2445				-1	5	5	5	7.8	7.8	7.8	50.092	0	310.52	2629900	25	37	NbE03057996.1;NbD045593.1	NbE03057996.1;NbD045593.1	2123
NaN	NaN	NaN	17.2023	17.0571	17.128				-1	12	2	2	35.6	11.4	11.4	44.698	0	31.257	1542700	19	13	NbD045703.1	NbD045703.1	2127
NaN	NaN	NaN	16.824	16.8996	16.7979				-1	9	9	4	17.4	17.4	8.5	50.315	0	67.575	1941800	18	32	NbD045744.1	NbD045744.1	2128
15.6058	NaN	NaN	15.9052	15.9158	15.9172				-1	2	2	2	4.2	4.2	4.2	57.264	0	33.413	1372800	26	29	NbD045756.1	NbD045756.1	2130
16.861	16.7475	16.6437	16.938	16.4489	16.8981				-1	6	6	2	48.6	48.6	17.8	16.587	0	90.731	2296900	9	35	NbD045807.1;NbD046625.1;NbD046604.1	NbD045807.1;NbD046625.1;NbD046604.1	2132
15.6229	15.5204	15.3039	15.9531	15.8036	15.9277				-1	6	6	6	30	30	30	22.852	0	87.568	1463300	10	40	NbD045868.1;NbD040333.1;NbD050805.1	NbD045868.1;NbD040333.1	2135
19.4531	19.7586	19.6401	18.3894	18.4608	18.2829				-1	10	10	3	21.1	21.1	5.3	51.712	0	156.17	14855000	24	90	NbD045966.1	NbD045966.1	2139
19.2353	19.1314	19.3276	19.1864	19.2039	19.0613				-1	29	29	1	45	45	2.7	62.104	0	323.31	27320000	32	199	NbD046002.1	NbD046002.1	2141
NaN	NaN	NaN	14.9295	14.9301	14.8584				-1	2	2	2	4	4	4	69.273	0	22.611	641550	26	14	NbD046040.1	NbD046040.1	2142
15.3646	15.2697	NaN	16.6828	16.4491	16.6874				-1	3	1	1	28.5	17.9	17.9	13.725	0	16.291	1569100	7	17	NbD050753.1;NbD046044.1	NbD050753.1;NbD046044.1	2143
14.4331	NaN	15.3576	16.3075	16.4161	16.467				-1	8	8	8	27.7	27.7	27.7	53.387	0	117.31	1943200	22	46	NbD046047.1;NbD051495.1;NbE03057442.1	NbD046047.1;NbD051495.1	2144
16.6884	16.9749	NaN	16.302	15.8596	16.187				-1	5	2	2	34.1	12.2	12.2	13.642	0	37.242	1124700	9	18	NbD046153.1	NbD046153.1	2149
17.9817	17.9086	17.7437	18.488	18.482	18.4843				-1	9	9	2	24.5	24.5	3.6	47.669	0	183.59	8106500	18	80	NbD046227.1	NbD046227.1	2151
NaN	16.2197	16.4927	16.42	16.4275	16.3916				-1	3	3	3	5.2	5.2	5.2	51.247	0	48.417	1576100	21	23	NbD046303.1;NbD023569.1;NbD017782.1	NbD046303.1	2153
19.0599	19.3248	18.55	19.0291	18.9087	19.2846				-1	26	6	1	61	23.5	7.4	53.103	0	203.22	9047100	23	50	NbD046317.1	NbD046317.1	2154
16.2716	16.3793	15.9547	16.4663	16.4432	16.4846				-1	15	4	1	35.3	14.9	3.3	54.042	0	56.747	2084100	27	32	NbD046324.1	NbD046324.1	2155
NaN	NaN	NaN	17.5387	17.6278	17.6034				-1	7	3	3	13.7	4.8	4.8	50.151	0	41.362	1758900	17	16	NbD046327.1	NbD046327.1	2156
16.0097	15.9835	16.2819	16.6296	16.6137	16.5717				-1	9	9	3	19.2	19.2	4.4	55.771	0	195.38	3301800	26	52	NbD046335.1	NbD046335.1	2157
NaN	NaN	NaN	15.2593	15.2399	15.2699				-1	3	3	3	28.8	28.8	28.8	17.814	0	22.619	360410	12	12	NbD046450.1	NbD046450.1	2160
17.7047	17.7888	17.4114	15.5734	14.2971	15.69				-1	40	4	4	45.6	2.6	2.6	80.164	0	47.065	2712600	34	43	NbD046535.1	NbD046535.1	2163
16.1449	16.1558	15.4714	14.7954	NaN	NaN				-1	8	8	8	32.1	32.1	32.1	44.827	0	60.857	656000	24	19	NbE05066005.1;NbD046673.1;NbD048589.1	NbE05066005.1;NbD046673.1;NbD048589.1	2168
17.8062	17.5141	17.9038	17.126	17.0382	17.0621				-1	13	5	4	41.7	19.7	16.8	34.637	0	168.96	3726900	14	37	NbD046687.1	NbD046687.1	2169
NaN	NaN	NaN	16.2749	16.2865	16.5269				-1	4	4	4	16.4	16.4	16.4	41.205	0	35.581	643810	18	13	NbD046700.1;NbD031402.1	NbD046700.1;NbD031402.1	2171
17.1898	17.2462	17.1465	17.2795	17.166	17.2693				-1	3	3	3	20.6	20.6	20.6	26.417	0	88.966	2908500	15	26	NbE03055033.1;NbD051642.1;NbD046721.1	NbE03055033.1;NbD051642.1;NbD046721.1	2172
15.105	15.0062	NaN	14.6846	14.6389	14.5745				-1	5	5	5	16.9	16.9	16.9	49.882	0	54.933	678800	22	26	NbD047233.1;NbD044075.1	NbD047233.1	2184
NaN	15.5024	15.0528	15.223	15.2552	15.4602				-1	6	6	2	6	6	1.4	107.25	0	77.965	1151500	47	33	NbE03058179.1;NbD047267.1	NbE03058179.1;NbD047267.1	2186
16.8115	16.9624	16.5206	16.4589	NaN	16.1745				-1	3	3	1	16.2	16.2	4.9	31.07	0	42.956	1391100	15	17	NbD047275.1	NbD047275.1	2187
18.4608	17.9744	18.4777	19.6712	19.588	19.4733				-1	8	8	1	35.5	35.5	3.7	25.025	0	244.59	22907000	8	79	NbD047411.1;NbD015307.1	NbD047411.1	2191
16.7869	16.6625	16.3798	16.1515	16.2447	16.1185				-1	8	8	8	25.5	25.5	25.5	31.371	0	126.73	2739200	15	47	NbD047541.1;NbE44069330.1;NbD038134.1;NbE44074290.1	NbD047541.1;NbE44069330.1;NbD038134.1;NbE44074290.1	2195
15.224	15.1675	15.2177	16.0519	16.145	16.1986				-1	4	4	2	15.2	15.2	8.7	35.424	0	86.711	1026600	16	24	NbD047628.1;NbE44071807.1	NbD047628.1;NbE44071807.1	2196
NaN	NaN	NaN	15.1841	15.0538	15.1503				-1	2	2	2	8.3	8.3	8.3	27.248	0	15.481	284020	15	8	NbD047811.1;NbD050162.1	NbD047811.1;NbD050162.1	2199
NaN	NaN	NaN	16.1	16.1729	16.1104				-1	2	2	2	4.4	4.4	4.4	66.103	0	21.093	714580	40	12	NbD048061.1;NbD048233.1;NbE05063227.1	NbD048061.1;NbD048233.1;NbE05063227.1	2210
16.2533	15.7237	15.8355	15.4103	15.5345	15.3515				-1	3	3	3	14.7	14.7	14.7	28.368	0	39.63	993990	16	21	NbE05063224.1;NbD048067.1	NbE05063224.1;NbD048067.1	2211
19.315	19.5005	19.2983	18.8264	18.823	18.7613				-1	38	18	4	49.1	27	5.7	70.998	0	323.31	18927000	37	158	NbD048169.1	NbD048169.1	2213
20.0839	19.9608	20.3186	19.5472	19.7244	19.5373				-1	5	5	5	37.3	37.3	37.3	27.075	0	213.75	14608000	13	48	NbD048170.1;NbE03060611.1;NbE05064811.1;NbD049562.1;NbE03058388.1;NbD037285.1	NbD048170.1;NbE03060611.1;NbE05064811.1;NbD049562.1	2214
15.6046	15.7453	15.7784	NaN	NaN	NaN				-1	2	2	1	8.1	8.1	3.2	55.737	0	27.879	507520	35	10	NbD048218.1	NbD048218.1	2215
16.5261	16.5897	16.7987	19.1034	19.0384	19.1088				-1	33	33	16	21.5	21.5	10.1	202.44	0	323.31	27643000	95	188	NbE05064444.1;NbD048267.1	NbE05064444.1;NbD048267.1	2216
17.7812	17.7904	17.4946	18.1817	17.9809	18.0609				-1	14	14	4	29.7	29.7	8.4	92.096	0	235.2	6081100	48	90	NbD048278.1;NbE44072860.1;NbD045153.1	NbD048278.1;NbE44072860.1	2217
NaN	NaN	NaN	15.0527	15.0729	15.1088				-1	3	3	3	24.5	24.5	24.5	27.003	0	28.94	725920	12	19	NbD048309.1;NbD031046.1;NbE03061085.1;NbD037879.1	NbD048309.1;NbD031046.1	2218
16.7598	16.5271	16.186	15.8466	15.6466	15.7903				-1	7	7	5	37.5	37.5	26.6	27.949	0	72.501	2444200	14	51	NbD048340.1;NbE03060345.1	NbD048340.1;NbE03060345.1	2220
NaN	NaN	NaN	14.4381	14.3568	14.286				-1	17	5	5	26.6	9.8	9.8	104.24	0	43.071	379230	49	16	NbD048677.1	NbD048677.1	2227
NaN	NaN	NaN	15.3904	15.3853	15.3405				-1	5	5	5	9.6	9.6	9.6	82.849	0	41.183	383290	46	19	NbD048785.1	NbD048785.1	2231
17.6521	17.7548	16.9676	17.3813	17.2919	17.2507				-1	37	4	4	41.8	6.9	6.9	71.01	0	65.329	3114300	37	34	NbD048805.1;NbD039221.1	NbD048805.1;NbD039221.1	2232
14.2196	13.5003	NaN	17.6821	17.4435	17.419				-1	10	9	2	25.4	21.4	5.4	71.81	0	170.55	3299700	31	54	NbD048825.1;NbE03057646.1	NbD048825.1;NbE03057646.1	2233
17.1757	16.735	16.9771	16.7251	16.9852	17.0897				-1	7	7	4	20.8	20.8	12.2	53.555	0	72.962	3710100	19	48	NbD048828.1;NbD048827.1	NbD048828.1	2234
16.4602	16.5657	17.3559	17.4114	17.5011	17.4809				-1	5	1	0	24.9	6.2	0	27.713	0	19.87	3945900	12	29	NbD048843.1;NbD023064.1;NbD002484.1	NbD048843.1;NbD023064.1	2236
20.1899	20.0025	20.2665	19.9668	19.7664	19.7418				-1	10	4	4	29.9	15.4	15.4	51.044	0	181.28	12325000	30	39	NbD048856.1	NbD048856.1	2237
15.757	NaN	NaN	16.2053	16.3596	16.439				-1	13	3	0	24.8	6.3	0	49.303	0	43.343	794090	25	15	NbD053060.1;NbD048861.1	NbD053060.1;NbD048861.1	2238
17.3644	17.3996	17.2805	17.5481	17.5978	17.5829				-1	7	7	4	49.4	49.4	36.1	27.706	0	316.44	5779200	10	54	NbE03058233.1;NbD048893.1	NbE03058233.1;NbD048893.1	2242
NaN	17.2141	NaN	16.5696	15.423	15.9982				-1	20	3	0	50.1	16.7	0	42.553	0	39.612	1954600	22	22	NbD048983.1	NbD048983.1	2247
17.7603	17.9439	17.8213	16.8801	16.98	16.8685				-1	8	8	8	22	22	22	42.296	0	93.822	3471100	21	50	NbD048991.1	NbD048991.1	2248
15.25	15.0762	15.2006	NaN	NaN	NaN				-1	2	2	2	14.4	14.4	14.4	22.811	0	50.305	607990	11	14	NbD049007.1;NbE44072129.1;NbD012257.1	NbD049007.1;NbE44072129.1;NbD012257.1	2250
18.4286	18.5863	17.9676	18.2365	17.9981	18.1565				-1	15	7	6	59.6	34.8	28	27.465	0	278.79	12795000	14	94	NbD049122.1	NbD049122.1	2257
NaN	NaN	14.6934	15.8144	16.1115	NaN				-1	2	2	1	6.3	6.3	4	65.102	0	141.15	1241300	33	15	NbD049159.1	NbD049159.1	2258
18.188	17.8593	17.8706	17.5212	17.606	17.4269				-1	11	3	3	51.9	15.2	15.2	25.92	0	47.384	2686600	13	35	NbD049163.1	NbD049163.1	2259
16.0572	15.7737	NaN	16.0734	16.4657	16.3589				-1	21	5	5	57.4	17.2	17.2	61.191	0	93.257	1245500	35	24	NbD049215.1	NbD049215.1	2260
NaN	NaN	NaN	16.1988	16.0378	16.2266				-1	3	3	1	11.8	11.8	5	29.197	0	24.991	708560	13	13	NbD049321.1;NbE03061280.1;NbD043340.1	NbD049321.1;NbE03061280.1	2263
NaN	NaN	NaN	18.1866	18.3403	18.1997				-1	9	9	5	23.4	23.4	12.8	58.006	0	169.41	7090100	18	43	NbD049495.1;NbE03059875.1	NbD049495.1;NbE03059875.1	2269
NaN	NaN	NaN	15.5499	15.3755	15.5524				-1	3	3	3	11	11	11	53.28	0	21.759	675970	25	16	NbD049528.1	NbD049528.1	2272
15.6633	15.9646	15.9237	16.5442	16.7133	16.6979				-1	10	5	5	12.7	8.1	8.1	122.94	0	114.88	1994600	63	38	NbD049531.1	NbD049531.1	2273
16.6877	16.2229	16.6345	15.2949	NaN	NaN				-1	3	3	3	20.1	20.1	20.1	24.855	0	41.648	627270	13	15	NbD049573.1;NbE03060798.1;NbD003994.1	NbD049573.1;NbE03060798.1	2275
14.4124	14.5974	14.8591	14.5743	14.9075	14.886				-1	6	6	5	14.3	14.3	12	67.343	0	51.715	929610	33	32	NbD049579.1;NbD020852.1	NbD049579.1;NbD020852.1	2276
15.2328	15.3095	15.5606	NaN	16.0452	16.1977				-1	3	3	1	5.6	5.6	1.6	90.504	0	35.497	1099400	45	21	NbD049682.1	NbD049682.1	2280
NaN	14.9408	NaN	14.9983	15.0144	15.1734				-1	4	4	1	7.8	7.8	4.4	63.85	0	107.65	630200	27	17	NbE03056426.1;NbD049684.1	NbE03056426.1;NbD049684.1	2281
17.7473	NaN	17.064	17.559	16.5647	16.643				-1	5	5	1	50	50	15.3	12.967	0	51.813	4289200	10	33	NbD049767.1	NbD049767.1	2282
17.4895	17.2676	17.0634	17.6703	17.6791	17.7061				-1	5	5	5	13.8	13.8	13.8	76.925	0	73.193	3691800	30	35	NbD049796.1;NbD027995.1;NbD031381.2	NbD049796.1;NbD027995.1	2283
17.165	16.9132	17.3603	16.588	16.739	16.6715				-1	17	3	1	34.4	7.5	3	73.362	0	78.704	1580400	30	18	NbD049851.1;NbD050395.1;NbE03060355.1	NbD049851.1;NbD050395.1;NbE03060355.1	2286
15.0363	15.3969	15.2289	15.9658	15.8652	16.0006				-1	9	9	6	46.4	46.4	21.4	32.791	0	157.09	1163500	15	32	NbD049880.1	NbD049880.1	2288
NaN	NaN	NaN	17.0726	17.1101	17.0851				-1	5	5	2	11	11	4.1	77.8	0	124.27	2015900	36	26	NbD050098.1;NbE44070733.1	NbD050098.1;NbE44070733.1	2290
17.834	18.0041	18.2497	18.2408	18.3442	18.2965				-1	20	20	19	38.6	38.6	37.6	56.848	0	323.31	12215000	27	105	NbD050145.1	NbD050145.1	2291
16.902	17.2161	17.2262	16.1743	16.9808	16.563				-1	41	7	5	42.2	10.4	8	80.189	0	101.86	1699900	34	26	NbE05065370.1;NbD050231.1;NbD013054.1;NbD022473.1	NbE05065370.1;NbD050231.1	2296
17.4186	16.9788	17.8039	17.1101	16.8408	16.872				-1	4	4	4	10.4	10.4	10.4	55.721	0	49.729	3308700	30	34	NbD050336.1;NbD053006.1	NbD050336.1;NbD053006.1	2301
20.6992	20.7491	20.89	21.4018	21.4196	21.5409				-1	12	12	3	19.1	19.1	6.3	80.392	0	323.31	33290000	32	67	NbD050393.1	NbD050393.1	2303
NaN	NaN	NaN	14.3336	14.2393	14.278				-1	5	5	5	33.6	33.6	33.6	25.456	0	48.971	243090	12	14	NbD050436.1;NbE05067996.1;NbE03060979.1	NbD050436.1;NbE05067996.1	2305
18.2781	18.3482	17.9037	18.6587	18.6133	18.7137				-1	17	17	16	34.2	34.2	34.2	67.474	0	299.72	12884000	32	108	NbD050557.1;NbE05066115.1;NbD026369.1	NbD050557.1	2310
16.6865	16.7326	16.518	16.7199	16.8756	17.0069				-1	7	7	7	13.6	13.6	13.6	95.707	0	190.23	2437800	45	46	NbE03054765.1;NbD050650.1;NbD018527.1;NbE05066183.1	NbE03054765.1;NbD050650.1;NbD018527.1	2315
15.4446	NaN	15.4375	15.5028	15.6591	15.5977				-1	3	3	3	11.1	11.1	11.1	33.471	0	28.167	775290	18	18	NbD050651.1	NbD050651.1	2316
16.965	17.4237	17.2641	16.4042	17.0263	17.189				-1	9	9	9	21.2	21.2	21.2	55.66	0	170.58	4889300	24	49	NbD050769.1;NbD038877.1	NbD050769.1;NbD038877.1	2318
15.8603	15.9771	17.0786	NaN	NaN	NaN				-1	4	4	4	13.5	13.5	13.5	54.743	0	27.527	928130	29	22	NbE03054927.1;NbD050829.1	NbE03054927.1;NbD050829.1	2321
NaN	NaN	NaN	15.7965	15.6331	15.6606				-1	3	3	1	31.8	31.8	12.2	16.464	0	28.272	964610	7	20	NbD050869.1	NbD050869.1	2322
15.849	16.0107	15.7327	15.6257	15.8336	15.9532				-1	2	2	2	20.4	20.4	20.4	17.28	0	52.554	957720	11	18	NbD050892.1	NbD050892.1	2323
16.3508	16.2874	16.3869	15.4417	15.5745	15.5191				-1	9	9	1	39.3	39.3	7.3	29.416	0	86.831	2377900	13	63	NbD050929.1	NbD050929.1	2324
17.6624	17.9297	17.9613	NaN	NaN	17.9345				-1	3	3	3	13.5	13.5	13.5	35.68	0	44.869	2033100	13	17	NbD051097.1;NbE03061143.1;NbD035229.1	NbD051097.1;NbE03061143.1	2331
16.432	16.4055	16.1888	17.2275	17.2756	17.296				-1	5	5	2	9.6	9.6	5.2	88.844	0	83.507	2519700	38	45	NbD051101.1	NbD051101.1	2332
15.4154	15.6266	15.3549	16.3198	16.8354	16.3359				-1	13	11	6	20.7	17.8	11.1	84.235	0	112.51	2722800	49	50	NbD051185.1	NbD051185.1	2338
18.4305	18.4999	18.689	NaN	NaN	NaN				-1	2	2	2	6.5	6.5	6.5	18.057	0	20.3	1468600	8	8	NbD053112.1;NbD051206.1	NbD053112.1;NbD051206.1	2339
18.0246	18.0541	17.7666	18.3996	18.3763	18.4533				-1	17	17	2	33.3	33.3	3.9	67.294	0	304.47	10826000	33	120	NbD051263.1	NbD051263.1	2340
NaN	NaN	NaN	16.5342	16.5554	16.5197				-1	4	4	4	5.7	5.7	5.7	118.64	0	47.826	1606200	61	24	NbD051382.1	NbD051382.1	2341
21.1475	21.1659	21.0477	21.3516	21.2211	21.3772				-1	11	11	11	26.4	26.4	26.4	41.869	0	196.18	36631000	20	159	NbD051503.1;NbD047176.1	NbD051503.1	2345
NaN	NaN	NaN	15.5432	15.6501	15.6077				-1	2	2	2	8.8	8.8	8.8	16.944	0	16.36	937990	6	19	NbD051574.1	NbD051574.1	2347
NaN	14.9708	15.7228	NaN	15.5452	15.4935				-1	5	2	2	36.3	26.3	26.3	27.245	0	33.886	929890	14	14	NbD051624.1	NbD051624.1	2349
18.1037	18.4842	18.1312	18.3068	17.8558	18.119				-1	10	5	4	47.2	33	28.3	25.416	0	111.18	3125400	12	23	NbD051708.1;NbD017487.1	NbD051708.1;NbD017487.1	2353
15.6255	NaN	NaN	15.8102	16.164	15.9481				-1	6	3	3	40.2	26.9	26.9	27.785	0	27.489	869870	10	19	NbD052075.1	NbD052075.1	2365
NaN	NaN	16.8854	16.3322	NaN	16.6352				-1	6	2	2	66.1	23.2	23.2	12.387	0	56.197	1562500	8	16	NbD052106.1	NbD052106.1	2367
19.0248	18.6445	18.7613	19.0317	18.9507	19.0739				-1	19	6	6	78.3	43.7	43.7	35.896	0	323.31	9709400	13	59	NbD052122.1	NbD052122.1	2369
NaN	NaN	NaN	15.6457	15.6225	15.8175				-1	4	4	4	7.1	7.1	7.1	104.36	0	27.741	791240	47	21	NbD052329.1;NbE44071763.1;NbD050814.1	NbD052329.1;NbE44071763.1;NbD050814.1	2373
16.5187	NaN	NaN	16.5849	16.6806	16.705				-1	3	2	2	7.2	5	5	67.538	0	73.649	1883500	31	18	NbD052374.1	NbD052374.1	2375
15.2518	15.7217	15.0382	15.586	15.6338	15.5997				-1	4	4	2	20	20	13.6	24.49	0	36.653	860000	11	26	NbD052403.1	NbD052403.1	2377
17.2109	17.1848	17.2984	17.8259	17.7965	17.8423				-1	27	14	7	29.7	21.5	10.6	110.33	0	191.96	8487000	57	120	NbD052482.1	NbD052482.1	2380
17.5661	17.3368	17.3584	17.5338	17.4811	17.7127				-1	9	9	2	23.2	23.2	6.2	37.342	0	129.32	5264700	17	63	NbD052515.1	NbD052515.1	2383
15.7848	15.7282	15.6296	15.2707	15.3917	15.4114				-1	7	7	7	10.2	10.2	10.2	108.42	0	48.884	853620	48	27	NbE03057219.1;NbD052748.1	NbE03057219.1;NbD052748.1	2388
NaN	16.4168	NaN	15.5157	NaN	15.3909				-1	2	2	2	16	16	16	23.787	0	20.115	574720	14	9	NbD052827.1;NbD045336.1	NbD052827.1;NbD045336.1	2390
17.0133	17.12	16.5897	NaN	16.0239	16.1639				-1	3	3	3	42.7	42.7	42.7	10.078	0	36.377	1683500	6	26	NbD052940.1;NbD016942.1	NbD052940.1;NbD016942.1	2393
NaN	NaN	16.1384	15.3212	NaN	15.4163				-1	3	3	3	10.4	10.4	10.4	59.739	0	69.176	691210	25	14	NbE03059754.1;NbD053011.1;NbE05068670.1;NbD037338.1	NbE03059754.1;NbD053011.1;NbE05068670.1;NbD037338.1	2394
NaN	NaN	NaN	17.9127	17.8378	17.9082				-1	5	5	5	11.7	11.7	11.7	38.699	0	284.46	4053500	16	43	NbD053078.1	NbD053078.1	2396
17.276	17.1915	17.1099	17.1541	17.2926	17.1285				-1	10	10	10	31.6	31.6	31.6	48.016	0	203.1	5697200	26	90	NbD053263.1;NbD034239.1;NbE44069446.1	NbD053263.1;NbD034239.1;NbE44069446.1	2399
15.3081	15.3508	14.8833	15.2419	15.3272	15.3503				-1	6	6	6	20	20	20	50.09	0	104.87	1230900	26	36	NbE03053650.1;NbD046573.1;NbD036111.1;NbE03053664.1;NbE44072031.1;NbD028858.1	NbE03053650.1;NbD046573.1;NbD036111.1	2403
NaN	15.3354	15.5058	15.447	15.8118	15.6044				-1	7	7	7	8.5	8.5	8.5	108.61	0	53.171	1441200	53	32	NbE03053722.1;NbD025568.1;NbD007133.1;NbD021260.1;NbD019145.1;NbD010272.1	NbE03053722.1;NbD025568.1;NbD007133.1	2404
18.0429	18.121	18.4402	18.603	18.5685	18.5771				-1	13	13	1	37.2	37.2	3.9	67.232	0	285.86	7962400	39	77	NbE03054039.1;NbE05062950.1;NbD034643.1	NbE03054039.1;NbE05062950.1;NbD034643.1	2409
18.1552	18.0787	17.6093	17.5839	17.6904	17.7136				-1	4	4	3	13.6	13.6	10.4	57.695	0	120.32	4995100	30	57	NbE03054249.1;NbD025603.1;NbD018797.1;NbD003983.1;NbE03060119.1	NbE03054249.1;NbD025603.1;NbD018797.1;NbD003983.1	2411
16.6154	16.8867	17.3405	16.5599	16.7402	16.7146				-1	12	9	9	22.6	13.9	13.9	54.518	0	259.2	3408100	23	50	NbE03054430.1	NbE03054430.1	2412
17.654	17.6646	17.7059	16.4369	NaN	NaN				-1	15	5	5	28.1	12.9	12.9	84.93	0	48.457	1724300	36	20	NbE03054496.1;NbE44072942.1	NbE03054496.1;NbE44072942.1	2413
17.3377	17.3773	17.0032	18.1329	17.9774	18.0837				-1	11	11	1	23.1	23.1	3.5	71.966	0	226.36	9508900	31	106	NbE03054944.1	NbE03054944.1	2415
NaN	NaN	NaN	15.7302	15.8646	15.8836				-1	7	7	3	9.1	9.1	4.7	195.03	0	89.321	1206900	82	28	NbE03054981.1;NbD045669.1	NbE03054981.1;NbD045669.1	2417
18.5137	18.7359	18.3275	18.4705	18.547	18.5703				-1	37	37	8	47.2	47.2	9.1	69.052	0	323.31	19848000	32	237	NbE03055085.1	NbE03055085.1	2418
NaN	NaN	NaN	15.9394	15.8485	15.9019				-1	14	14	4	13.1	13.1	4.8	171.51	0	151.66	2762500	84	63	NbE03055912.1;NbD008853.1	NbE03055912.1;NbD008853.1	2423
17.4924	17.128	17.5006	NaN	18.0688	18.2328				-1	12	2	1	26	12.3	7.8	49.336	0	36.109	5474900	25	24	NbE03056103.1;NbD029989.1	NbE03056103.1;NbD029989.1	2425
18.1315	17.9267	18.3363	18.2304	18.186	18.0386				-1	32	5	5	55.7	6.8	6.8	48.511	0	227.14	7050500	21	51	NbE03056217.1	NbE03056217.1	2426
17.4681	17.6778	NaN	17.114	17.4036	17.5171				-1	12	2	2	27.5	4.7	4.7	41.921	0	65.85	2233600	20	19	NbE03056644.1	NbE03056644.1	2428
NaN	NaN	NaN	16.0848	16.1196	16.1619				-1	12	12	4	16.2	16.2	6	133.21	0	229.69	2117900	62	51	NbE03057383.1	NbE03057383.1	2433
18.4898	18.4435	18.4038	18.6009	18.4224	18.4146				-1	39	10	4	51.4	14.1	3.8	84.524	0	192.81	7853500	41	70	NbE03057400.1	NbE03057400.1	2434
15.7829	15.6382	15.8251	16.5658	16.5125	16.5481				-1	10	10	4	30.3	30.3	10.7	60.122	0	151.51	3214500	27	67	NbE03057934.1;NbD035728.1	NbE03057934.1;NbD035728.1	2438
15.6857	15.4035	NaN	19.1813	19.2001	19.3045				-1	6	6	2	16.8	16.8	8.5	36.586	0	94.475	8373500	16	38	NbE03058149.1;NbD004083.1	NbE03058149.1;NbD004083.1	2439
17.6091	17.605	17.6038	18.147	18.0796	18.245				-1	8	8	3	40.3	40.3	17.6	37.605	0	108.98	6780700	21	58	NbE03058749.1	NbE03058749.1	2444
15.8933	15.6479	16.0808	16.3644	16.4152	16.3965				-1	8	8	2	57.9	57.9	17.1	24.061	0	195.65	3522400	12	66	NbE03058793.1;NbD048597.1;NbD044496.1	NbE03058793.1;NbD048597.1	2445
18.1453	18.1342	18.3533	18.7549	18.813	18.7382				-1	22	9	3	41	18.3	4.8	41.046	0	224.72	14902000	21	75	NbE03059042.1;NbD021564.1;NbE05066423.1	NbE03059042.1;NbD021564.1;NbE05066423.1	2448
17.7993	17.8644	17.9679	17.9177	17.8175	17.7776				-1	11	11	0	41.9	41.9	0	29.062	0	309.8	11015000	15	108	NbE03059100.1	NbE03059100.1	2450
NaN	NaN	NaN	15.228	15.1543	15.1654				-1	5	5	4	12.1	12.1	12.1	60.535	0	33.351	592310	24	17	NbE03059804.1;NbD015354.1	NbE03059804.1;NbD015354.1	2454
16.4675	16.4761	16.487	16.7056	16.6478	16.6367				-1	5	5	2	33.4	33.4	10	32.082	0	50.298	2423200	19	47	NbE03060011.1	NbE03060011.1	2455
20.4374	20.8287	19.957	20.2348	20.1715	20.2695				-1	8	8	3	27.9	27.9	14.2	41.877	0	323.31	15103000	20	55	NbE03060212.1;NbD022601.1	NbE03060212.1;NbD022601.1	2459
17.9638	18.0423	18.0556	17.5353	17.4539	17.5176				-1	19	19	1	25.5	25.5	1.6	75.319	0	309.75	10349000	36	127	NbE03060232.1	NbE03060232.1	2460
18.8058	19.012	18.9674	18.2689	18.3447	18.2793				-1	25	6	6	59.3	11.1	11.1	42.801	0	57.359	7752200	23	43	NbE03060872.1	NbE03060872.1	2465
14.5792	14.5301	14.1932	NaN	NaN	NaN				-1	3	3	2	6.9	6.9	4.1	72.495	0	21.722	196470	35	13	NbE03061056.1;NbD004999.1	NbE03061056.1;NbD004999.1	2468
20.0242	20.123	19.6795	18.659	18.4798	18.5265				-1	4	4	3	29.9	29.9	25.5	21.05	0	138.12	9707200	8	32	NbE03061400.1;NbD027327.1;NbD031193.1	NbE03061400.1;NbD027327.1;NbD031193.1	2469
18.2461	18.3082	18.2009	18.083	18.1179	18.1313				-1	24	24	8	54.5	54.5	27.9	50.007	0	323.31	16914000	33	194	NbE03061757.1;NbD034140.1	NbE03061757.1;NbD034140.1	2470
15.4025	15.5995	15.357	15.2299	15.2161	14.758				-1	4	4	4	27.1	27.1	27.1	20.894	0	42.312	588740	9	18	NbE03061938.1;NbD040681.1;NbD046422.1	NbE03061938.1;NbD040681.1	2472
18.4765	18.5309	18.6553	18.2436	18.2878	18.302				-1	20	20	1	35.7	35.7	5.1	73.096	0	323.31	12878000	37	125	NbE03062045.1	NbE03062045.1	2474
NaN	NaN	15.0427	14.9151	15.0654	14.9846				-1	4	2	2	31	20.1	20.1	17.323	0	56.934	369410	11	13	NbE03062139.1	NbE03062139.1	2475
18.0067	17.9996	17.1266	NaN	NaN	15.3124				-1	4	4	4	23.8	23.8	23.8	13.402	0	54.133	2140100	7	27	NbE03062147.1;NbD034667.1;NbD029750.1	NbE03062147.1;NbD034667.1;NbD029750.1	2476
18.5243	18.5858	18.4903	18.4632	18.2093	18.362				-1	3	3	3	20	20	20	19.396	0	80.109	4449500	11	22	NbE03062283.1;NbD000261.1	NbE03062283.1;NbD000261.1	2478
16.0377	16.0147	16.1372	NaN	NaN	NaN				-1	5	5	5	23.5	23.5	23.5	29.561	0	48.339	871730	16	23	NbE05062862.1;NbE44070342.1	NbE05062862.1;NbE44070342.1	2480
NaN	NaN	NaN	16.8133	16.9218	16.8783				-1	6	4	0	6.8	4.1	0	130.49	0	59.041	1917700	63	28	NbE44071730.1;NbE05063534.1;NbD051631.1	NbE44071730.1;NbE05063534.1	2482
18.4655	19.2895	NaN	NaN	NaN	18.7255				-1	4	3	3	46.6	34.5	34.5	12.264	0	27.014	3301300	9	21	NbE05064048.1	NbE05064048.1	2483
19.899	19.4244	19.2237	19.8094	19.6902	19.7113				-1	28	3	0	39.9	5.9	0	65.014	0	71.316	11625000	31	34	NbE05064384.1	NbE05064384.1	2485
17.2635	17.141	17.4032	17.977	18.0103	17.991				-1	12	12	1	51.1	51.1	8.3	29.575	0	323.31	7547400	13	89	NbE05064533.1	NbE05064533.1	2486
NaN	NaN	15.3924	16.0821	16.177	16.2355				-1	3	3	1	11.4	11.4	4.8	31.893	0	31.915	887880	15	17	NbE05064888.1	NbE05064888.1	2489
21.402	21.3938	21.1537	20.6958	20.7069	20.7098				-1	34	34	17	64.2	64.2	44.2	52.865	0	323.31	138870000	23	316	NbE05064989.1;NbD046976.1;NbD001946.1;NbE05065000.1;NbD044043.1;NbD016631.1;NbD052540.1;NbE03053297.1;NbD050537.1;NbD005118.1	NbE05064989.1;NbD046976.1	2490
17.7311	17.9859	17.9108	18.5808	18.4924	18.5882				-1	11	11	1	22	22	3.1	56.264	0	323.31	8670100	28	81	NbE05065300.1;NbD006220.1;NbD039184.1	NbE05065300.1;NbD006220.1	2491
19.8678	19.9451	20.0148	20.6518	20.7399	20.7251				-1	27	27	11	47.1	47.1	23.9	43.176	0	323.31	67762000	19	261	NbE44073703.1;NbE05065517.1;NbD052111.1	NbE44073703.1;NbE05065517.1;NbD052111.1	2493
17.0955	16.8481	17.551	17.2865	17.4133	17.4387				-1	6	6	0	26	26	0	26.524	0	87.884	6433900	12	57	NbE05065716.1;NbD052618.1	NbE05065716.1;NbD052618.1	2496
NaN	NaN	NaN	17.224	17.2117	17.1375				-1	8	2	2	35	14.5	14.5	24.912	0	66.269	2378500	7	20	NbE05065846.1	NbE05065846.1	2497
18.5482	18.6095	18.7276	18.6968	18.6835	18.6244				-1	7	7	2	22.1	22.1	7.5	68.75	0	99.323	6737900	30	33	NbE05065916.1;NbD019966.1	NbE05065916.1;NbD019966.1	2498
16.4944	16.1642	16.4218	15.3923	15.2468	14.5536				-1	8	8	3	40.1	40.1	15.6	43.697	0	81.528	1274800	22	32	NbE05066068.1;NbD015466.1	NbE05066068.1;NbD015466.1	2501
15.2272	15.4452	NaN	15.2934	NaN	NaN				-1	5	4	4	19.4	15.4	15.4	44.847	0	30.554	688060	17	16	NbE05066820.1;NbD007898.1;NbE03056881.1;NbD026055.1	NbE05066820.1;NbD007898.1;NbE03056881.1;NbD026055.1	2505
NaN	NaN	NaN	14.7649	14.9106	14.9561				-1	2	2	2	4.2	4.2	4.2	102.73	0	43.354	299600	43	12	NbE05067569.1;NbE44069924.1;NbD004627.1	NbE05067569.1;NbE44069924.1;NbD004627.1	2508
18.9177	19.084	18.783	18.372	18.4584	18.4933				-1	30	30	4	26.6	26.6	4.9	177.14	0	323.31	20573000	78	202	NbE05068323.1	NbE05068323.1	2511
15.3874	15.5104	NaN	16.6968	16.6672	16.6882				-1	3	3	2	15.2	15.2	9.9	34.289	0	27.502	1530400	18	25	NbE05068523.1;NbD006562.1	NbE05068523.1	2512
NaN	NaN	NaN	15.8196	15.9013	15.9547				-1	5	5	5	9.2	9.2	9.2	71.653	0	43.965	986160	17	23	NbE05068732.1;NbE03055267.1	NbE05068732.1	2513
18.4893	18.4573	18.3748	18.4282	18.4648	18.3691				-1	20	6	1	29.2	13.8	5.3	48.003	0	257.78	8177200	29	74	NbE05068808.1;NbD017417.1	NbE05068808.1;NbD017417.1	2514
17.9688	17.8515	17.942	18.4452	18.24	18.2342				-1	25	25	8	40.6	40.6	17	72.023	0	323.31	18699000	32	184	NbE44069574.1	NbE44069574.1	2517
NaN	NaN	NaN	16.4812	16.5187	16.243				-1	17	17	17	40.9	40.9	40.9	62.987	0	287.8	2735600	29	55	NbE44070458.1;NbD048553.1	NbE44070458.1;NbD048553.1	2520
16.8236	16.8796	16.321	17.313	17.3534	17.3602				-1	10	10	6	39.5	39.5	25.4	34.86	0	96.846	3816500	19	47	NbE44070753.1;NbE03060292.1	NbE44070753.1;NbE03060292.1	2521
15.4414	NaN	15.4715	17.1923	16.9475	17.1125				-1	10	10	10	40.7	40.7	40.7	50.008	0	211.96	4144100	30	46	NbE44070901.1;NbD006163.1	NbE44070901.1;NbD006163.1	2523
15.693	15.737	16.0916	19.1575	19.2164	19.1334				-1	17	17	0	12.6	12.6	0	156.74	0	323.31	12930000	68	78	NbE44070942.1	NbE44070942.1	2524
18.1563	18.1575	18.5625	17.9425	18.0664	17.873				-1	7	7	5	16.8	16.8	11.7	64.179	0	119.25	4966400	34	41	NbE44072147.1;NbD020970.1;NbD052760.1	NbE44072147.1;NbD020970.1;NbD052760.1	2527
15.7821	15.4256	15.1962	19.2526	19.242	19.224				-1	63	16	0	66.4	21.9	0	107.76	0	323.31	17913000	57	112	NbE44072342.1	NbE44072342.1	2529
17.0601	17.0581	15.7487	16.7637	17.1293	17.2053				-1	10	10	0	17.8	17.8	0	78.77	0	141.73	2917900	35	43	NbE44072485.1	NbE44072485.1	2531
18.5672	18.4023	18.4489	18.8186	18.9325	18.8957				-1	14	14	7	34.9	34.9	18.6	55.772	0	323.31	16889000	23	114	NbE44072729.1;NbD014991.1	NbE44072729.1	2532
16.1705	NaN	NaN	16.2551	15.9971	16.2836				-1	27	1	1	33.5	1.7	1.7	106.65	0	46.063	1036400	47	12	NbE44072821.1;NbD040959.1;NbD002250.1	NbE44072821.1;NbD040959.1	2533
NaN	NaN	NaN	17.8272	17.8634	17.9025				-1	9	2	2	11.6	2.1	2.1	137.03	0	39.59	2452500	65	12	NbE44072991.1;NbD051893.1	NbE44072991.1;NbD051893.1	2534
NaN	NaN	NaN	17.194	17.1772	17.2221				-1	31	31	17	27.9	27.9	18	195.57	0	323.31	8964700	88	125	NbE44073682.1;NbE03058429.1;NbD010900.1	NbE44073682.1;NbE03058429.1;NbD010900.1	2537
21.2177	21.2659	21.0525	19.8359	19.5967	19.799				-1	16	16	4	33.6	33.6	12.2	91.696	0	321.62	24081000	39	115	NbE44074027.1;NbE03060606.1	NbE44074027.1;NbE03060606.1	2541
16.0105	16.0045	16.0737	15.614	15.6235	15.6378				-1	9	9	2	21.6	21.6	3.2	50.285	0	102.2	1315800	25	33	NbE44074279.1	NbE44074279.1	2543
17.3601	17.4849	17.6989	17.6467	17.5815	17.582				-1	5	5	5	26.3	26.3	26.3	21.907	0	75.377	4478900	9	35	NbE44074367.1;NbE05068647.1;NbD035172.1	NbE44074367.1;NbE05068647.1;NbD035172.1	2544
24.5589	24.568	24.648	22.514	22.5332	22.5428				-1	69	69	69	97.5	97.5	97.5	53.8	0	323.31	3913500000	26	4592	PafA|BAIT|BAIT_LABEL	PafA|BAIT|BAIT_LABEL	2546

## Sheet: only detected in AtRACK1a
Proteins only detected in samples from AtRACK1a-PafA
GFP_rep1	GFP_rep2	GFP_rep3	AtRACK_rep1	AtRACK_rep2	AtRACK_rep3	Count
			+	+	+	200
Protein IDs	Majority protein IDs	id
atRACK	atRACK	0
NbE05064168.1;NbD000166.1;NbE05064169.1	NbE05064168.1;NbD000166.1	14
NbE03055315.1;NbD000535.1	NbE03055315.1;NbD000535.1	22
NbD050608.1;NbE05064343.1;NbD007911.1;NbD020285.1;NbD000560.1	NbD050608.1;NbE05064343.1;NbD007911.1;NbD020285.1;NbD000560.1	23
NbE03059573.1;NbD000597.1	NbE03059573.1;NbD000597.1	26
NbD035474.1;NbD001029.1;NbD033517.1;NbD027909.1	NbD035474.1;NbD001029.1;NbD033517.1;NbD027909.1	52
NbD028652.1;NbD022971.1;NbD001068.1;NbE03061671.1	NbD028652.1;NbD022971.1;NbD001068.1;NbE03061671.1	56
NbD024491.1;NbE03060262.1;NbD001303.1	NbD024491.1;NbE03060262.1;NbD001303.1	69
NbD001333.1;NbD007942.1;NbE03060837.1;NbE03062469.1	NbD001333.1;NbD007942.1;NbE03060837.1;NbE03062469.1	71
NbD001415.1;NbE05065485.1;NbD015542.1	NbD001415.1;NbE05065485.1	76
NbD001463.1	NbD001463.1	79
NbD001875.1	NbD001875.1	103
NbD002190.1;NbD013740.1;NbE03056937.1	NbD002190.1;NbD013740.1;NbE03056937.1	121
NbE03058227.1;NbD011024.1;NbD002695.1	NbE03058227.1;NbD011024.1;NbD002695.1	145
NbD002901.1	NbD002901.1	154
NbE03057099.1;NbD002939.1	NbE03057099.1;NbD002939.1	156
NbD003433.1;NbD026038.1;NbE05063431.1	NbD003433.1;NbD026038.1;NbE05063431.1	186
NbD003525.1;NbD013869.1;NbD004501.1;NbD010443.1	NbD003525.1;NbD013869.1;NbD004501.1;NbD010443.1	192
NbD013144.1;NbD003598.1;NbD049416.1;NbD046368.1	NbD013144.1;NbD003598.1;NbD049416.1;NbD046368.1	197
NbD003818.1;NbE44072656.1;NbD038573.1;NbE05067836.1;NbD020504.1;NbE03059078.1;NbD044148.1;NbD025859.1	NbD003818.1;NbE44072656.1	211
NbD003870.1;NbE03053355.1;NbD002890.1	NbD003870.1;NbE03053355.1;NbD002890.1	217
NbE05068122.1;NbD045394.1;NbD004375.1;NbD010161.1;NbD035088.1;NbE44073814.1	NbE05068122.1;NbD045394.1;NbD004375.1	246
NbD051686.1;NbD029155.1;NbD012968.1;NbD006401.1;NbD004560.1;NbD000411.1	NbD051686.1;NbD029155.1;NbD012968.1;NbD006401.1;NbD004560.1;NbD000411.1	257
NbE44071352.1;NbD004675.1;NbD016832.1	NbE44071352.1;NbD004675.1;NbD016832.1	265
NbD004677.1;NbE03062168.1;NbD016829.1	NbD004677.1;NbE03062168.1;NbD016829.1	266
NbD004937.1	NbD004937.1	280
NbD005408.1	NbD005408.1	318
NbD005717.1	NbD005717.1	335
NbD005751.1	NbD005751.1	338
NbD011838.1;NbD005795.1	NbD011838.1;NbD005795.1	343
NbD046070.1;NbD013798.1;NbD010028.1;NbD005951.1;NbD041065.1	NbD046070.1;NbD013798.1;NbD010028.1;NbD005951.1;NbD041065.1	351
NbD031529.1;NbE05068423.1;NbD006299.1;NbE03057916.1;NbD020517.1	NbD031529.1;NbE05068423.1;NbD006299.1;NbE03057916.1;NbD020517.1	365
NbE03056006.1;NbD007021.1	NbE03056006.1;NbD007021.1	406
NbD023087.1;NbD007725.1;NbE05063828.1;NbD045001.1;NbD043780.1	NbD023087.1;NbD007725.1;NbE05063828.1;NbD045001.1;NbD043780.1	444
NbD031784.1;NbD028515.1;NbD010643.1;NbD010400.1;NbD007887.1;NbD042990.1	NbD031784.1;NbD028515.1;NbD010643.1;NbD010400.1;NbD007887.1;NbD042990.1	456
NbD008377.1;NbE05065732.1	NbD008377.1;NbE05065732.1	481
NbD052974.1;NbD030669.1;NbD008640.1	NbD052974.1;NbD030669.1;NbD008640.1	501
NbE05064534.1;NbD008707.1	NbE05064534.1;NbD008707.1	504
NbD008898.1;NbE05066640.1;NbE03054262.1	NbD008898.1;NbE05066640.1;NbE03054262.1	518
NbD009302.1;NbE05065425.1	NbD009302.1;NbE05065425.1	536
NbD009316.1	NbD009316.1	537
NbD009521.2;NbE03055539.1;NbD009521.1;NbE44074035.1;NbD009701.1	NbD009521.2;NbE03055539.1;NbD009521.1;NbE44074035.1;NbD009701.1	554
NbD009566.1;NbE05064499.1;NbD039690.1	NbD009566.1;NbE05064499.1;NbD039690.1	557
NbD010151.1;NbD009589.1;NbD009588.1	NbD010151.1;NbD009589.1;NbD009588.1	559
NbD009891.1;NbE44071173.1;NbD005399.1;NbE03060874.1	NbD009891.1;NbE44071173.1;NbD005399.1;NbE03060874.1	573
NbD010243.1;NbE05064396.1;NbD007578.1	NbD010243.1;NbE05064396.1	586
NbD010593.1;NbD010593.2	NbD010593.1;NbD010593.2	601
NbD038435.1;NbD010962.1	NbD038435.1;NbD010962.1	618
NbD011531.1	NbD011531.1	655
NbD011790.1;NbD045030.1	NbD011790.1	673
NbD011824.1;NbD051455.1	NbD011824.1;NbD051455.1	675
NbD039705.1;NbD011842.1	NbD039705.1;NbD011842.1	678
NbD039165.1;NbD012404.1	NbD039165.1;NbD012404.1	704
NbD012857.1;NbE05064745.1	NbD012857.1;NbE05064745.1	728
NbD013345.1;NbE03059674.1	NbD013345.1;NbE03059674.1	754
NbD013541.1;NbE03057304.1	NbD013541.1;NbE03057304.1	762
NbD014013.1	NbD014013.1	786
NbD043579.1;NbD014199.1	NbD043579.1;NbD014199.1	799
NbD014326.1	NbD014326.1	811
NbD014331.1;NbE03055041.1	NbD014331.1;NbE03055041.1	812
NbD014898.1;NbD031467.1;NbD024794.1;NbD000097.1	NbD014898.1;NbD031467.1;NbD024794.1	837
NbD022167.1;NbD015073.1	NbD022167.1;NbD015073.1	845
NbE03060284.1;NbD015387.1	NbE03060284.1;NbD015387.1	862
NbD036688.1;NbD015746.1	NbD036688.1;NbD015746.1	883
NbD015783.1	NbD015783.1	890
NbD015816.1;NbE44073706.1	NbD015816.1;NbE44073706.1	891
NbD016565.1;NbE03058186.1;NbD051974.1;NbD018483.1;NbD015852.1;NbD006632.1;NbE44069586.1	NbD016565.1;NbE03058186.1;NbD051974.1;NbD018483.1;NbD015852.1;NbD006632.1;NbE44069586.1	923
NbE44070508.1;NbD048901.1;NbD016824.1;NbE44071777.1	NbE44070508.1;NbD048901.1;NbD016824.1	930
NbD043694.1;NbD041460.1;NbD016868.1;NbD048288.1;NbD029946.1	NbD043694.1;NbD041460.1;NbD016868.1;NbD048288.1;NbD029946.1	933
NbD016943.1;NbD031589.1;NbD037388.1;NbD036571.1;NbD023451.1;NbD027710.1	NbD016943.1;NbD031589.1	941
NbD017089.1;NbE03056336.1;NbD007127.1;NbD005240.1;NbD037627.1;NbD033219.1	NbD017089.1;NbE03056336.1;NbD007127.1;NbD005240.1;NbD037627.1;NbD033219.1	947
NbD017724.1;NbD017502.1	NbD017724.1;NbD017502.1	967
NbD017820.1	NbD017820.1	980
NbE44072063.1;NbD017939.1;NbD017850.1;NbD033514.1;NbD046729.1	NbE44072063.1;NbD017939.1;NbD017850.1;NbD033514.1	983
NbD018100.1;NbD032229.1	NbD018100.1	997
NbD018234.1	NbD018234.1	1006
NbD050817.1;NbD040573.1;NbD019471.1;NbD018428.1;NbE05065820.1;NbD034970.1;NbE44073433.1;NbE03060055.1;NbD020181.1;NbD020182.1	NbD050817.1;NbD040573.1;NbD019471.1;NbD018428.1;NbE05065820.1;NbD034970.1;NbE44073433.1;NbE03060055.1;NbD020181.1	1013
NbE03060453.1;NbD018548.1	NbE03060453.1;NbD018548.1	1021
NbD019026.1;NbE05066763.1	NbD019026.1;NbE05066763.1	1043
NbD044787.1;NbD019389.1;NbD031076.1;NbD000101.1;NbD000396.1	NbD044787.1;NbD019389.1;NbD031076.1;NbD000101.1	1063
NbD040743.1;NbD048058.1;NbD042343.1;NbD019568.1;NbD040438.1	NbD040743.1;NbD048058.1;NbD042343.1;NbD019568.1;NbD040438.1	1073
NbD019734.1;NbD044430.1;NbD019732.1	NbD019734.1;NbD044430.1;NbD019732.1	1081
NbE05063775.1;NbD020300.1	NbE05063775.1;NbD020300.1	1094
NbD020341.1	NbD020341.1	1096
NbD020850.1;NbD025259.1	NbD020850.1	1118
NbD042159.1;NbD021396.1	NbD042159.1;NbD021396.1	1150
NbD021400.2;NbD021400.1;NbD021399.1	NbD021400.2;NbD021400.1;NbD021399.1	1151
NbD021435.1	NbD021435.1	1154
NbE44070891.1;NbE05067221.1;NbD021939.1;NbE05062901.1;NbD036437.1	NbE44070891.1;NbE05067221.1;NbD021939.1;NbE05062901.1;NbD036437.1	1179
NbD022309.1;NbE03061767.1;NbD018068.1;NbE44071766.1	NbD022309.1;NbE03061767.1;NbD018068.1;NbE44071766.1	1192
NbD035602.1;NbD032143.1;NbD022562.1;NbD013219.1	NbD035602.1;NbD032143.1;NbD022562.1;NbD013219.1	1201
NbD022585.1;NbD014268.1;NbD029831.1;NbD007551.1;NbE44070061.1;NbD011520.1;NbD022584.1;NbE03054593.1	NbD022585.1;NbD014268.1;NbD029831.1;NbD007551.1;NbE44070061.1;NbD011520.1	1204
NbD027495.1;NbD022849.1	NbD027495.1;NbD022849.1	1215
NbE03054254.1;NbD023107.1	NbE03054254.1;NbD023107.1	1225
NbD023423.1	NbD023423.1	1237
NbD023811.1	NbD023811.1	1252
NbD023842.1	NbD023842.1	1253
NbE44069792.1;NbE44069791.1;NbD023878.1;NbD016350.1	NbE44069792.1;NbE44069791.1;NbD023878.1;NbD016350.1	1255
NbD023977.1;NbE03053520.1	NbD023977.1;NbE03053520.1	1262
NbD024519.1;NbE05066552.1;NbE44069253.1;NbE05068112.1;NbD051729.1	NbD024519.1;NbE05066552.1;NbE44069253.1;NbE05068112.1;NbD051729.1	1282
NbD024559.1	NbD024559.1	1284
NbD024579.1;NbE05063359.1	NbD024579.1;NbE05063359.1	1285
NbE05067310.1;NbD024731.1	NbE05067310.1;NbD024731.1	1286
NbD042647.1;NbD024762.1;NbD035112.1;NbD001268.1;NbD034742.1;NbD013148.1	NbD042647.1;NbD024762.1;NbD035112.1;NbD001268.1;NbD034742.1;NbD013148.1	1289
NbD024919.1;NbD046098.1	NbD024919.1;NbD046098.1	1298
NbD024953.1	NbD024953.1	1302
NbD025064.1	NbD025064.1	1309
NbE05068254.1;NbD025457.1	NbE05068254.1;NbD025457.1	1328
NbD025469.1;NbD024722.1;NbD023955.1;NbD011424.1;NbD041917.1;NbE03058825.1;NbE05065416.1	NbD025469.1;NbD024722.1;NbD023955.1;NbD011424.1;NbD041917.1;NbE03058825.1	1330
NbD025748.1;NbE03058586.1	NbD025748.1;NbE03058586.1	1345
NbE44072281.1;NbD025860.1;NbE03054741.1;NbD044147.1;NbE44070708.1	NbE44072281.1;NbD025860.1;NbE03054741.1;NbD044147.1;NbE44070708.1	1354
NbD025909.1	NbD025909.1	1355
NbE03055346.1;NbD025915.1	NbE03055346.1;NbD025915.1	1356
NbE03060117.1;NbE03055760.1;NbD042709.1;NbD026461.1	NbE03060117.1;NbE03055760.1;NbD042709.1;NbD026461.1	1377
NbD026839.1;NbE05063410.1;NbE03056560.1	NbD026839.1;NbE05063410.1;NbE03056560.1	1389
NbD026907.1	NbD026907.1	1395
NbD027867.1;NbE03058222.1;NbD031858.1;NbE03056429.1	NbD027867.1;NbE03058222.1;NbD031858.1	1439
NbD028335.1	NbD028335.1	1461
NbD028502.1;NbD049173.1;NbD006402.1;NbD000786.1;NbD011065.1	NbD028502.1;NbD049173.1;NbD006402.1;NbD000786.1	1470
NbD029200.1;NbD028565.1	NbD029200.1;NbD028565.1	1474
NbD035351.1;NbD028945.1	NbD035351.1;NbD028945.1	1490
NbD029126.1;NbE03060847.1;NbE44070740.1	NbD029126.1;NbE03060847.1;NbE44070740.1	1498
NbD029299.1;NbE05063025.1;NbD010804.1;NbD010758.1;NbD022905.1;NbE05066957.1;NbD044351.1;NbD026178.1	NbD029299.1;NbE05063025.1;NbD010804.1;NbD010758.1;NbD022905.1;NbE05066957.1;NbD044351.1;NbD026178.1	1511
NbD029764.1	NbD029764.1	1532
NbD030764.1	NbD030764.1	1565
NbE03060074.1;NbD030848.1	NbE03060074.1;NbD030848.1	1567
NbD030932.1	NbD030932.1	1573
NbD042148.1;NbD031067.1	NbD042148.1;NbD031067.1	1580
NbD031450.1	NbD031450.1	1592
NbD038896.1;NbD031906.1	NbD038896.1;NbD031906.1	1601
NbD031941.1;NbD014011.1	NbD031941.1	1604
NbD032286.1	NbD032286.1	1615
NbD033394.1	NbD033394.1	1675
NbE05067815.1;NbD033395.1	NbE05067815.1;NbD033395.1	1676
NbD034190.1	NbD034190.1	1709
NbD034833.1;NbE44071419.1	NbD034833.1;NbE44071419.1	1735
NbE03060478.1;NbD034991.1	NbE03060478.1;NbD034991.1	1739
NbE03055354.1;NbD035299.1;NbD050759.1;NbD015477.1	NbE03055354.1;NbD035299.1;NbD050759.1;NbD015477.1	1750
NbD035635.1	NbD035635.1	1759
NbD036033.1	NbD036033.1	1774
NbD050542.1;NbD036339.1	NbD050542.1;NbD036339.1	1782
NbD036341.1	NbD036341.1	1783
NbD036440.1;NbD046539.1	NbD036440.1;NbD046539.1	1789
NbD036879.1;NbD051964.1;NbD017731.1	NbD036879.1	1809
NbD037085.1	NbD037085.1	1818
NbD037434.1;NbE05064271.1	NbD037434.1;NbE05064271.1	1826
NbD037970.1	NbD037970.1	1846
NbD040415.1;NbD038247.1;NbE44069407.1;NbE03058410.1;NbE03054217.1;NbD043709.1	NbD040415.1;NbD038247.1;NbE44069407.1;NbE03058410.1;NbE03054217.1;NbD043709.1	1861
NbD039121.1	NbD039121.1	1892
NbD039406.1;NbE44071008.1	NbD039406.1;NbE44071008.1	1905
NbD039722.1;NbE05063486.1;NbD030447.1	NbD039722.1;NbE05063486.1;NbD030447.1	1922
NbD040020.1	NbD040020.1	1933
NbE05065923.1;NbD040967.1	NbE05065923.1;NbD040967.1	1956
NbD041400.1;NbE44074001.1;NbE05063700.1;NbE05066933.1	NbD041400.1;NbE44074001.1;NbE05063700.1	1969
NbE05066340.1;NbD041659.1	NbE05066340.1;NbD041659.1	1979
NbD042103.1;NbD008222.1	NbD042103.1	1991
NbE05066373.1;NbD042535.1;NbE44069436.1;NbD042714.1	NbE05066373.1;NbD042535.1;NbE44069436.1;NbD042714.1	2000
NbE03059461.1;NbD046938.1;NbE03054676.1;NbD042537.1	NbE03059461.1;NbD046938.1;NbE03054676.1;NbD042537.1	2001
NbE03055894.1;NbD042712.1;NbE44069083.1;NbD026458.1	NbE03055894.1;NbD042712.1;NbE44069083.1;NbD026458.1	2006
NbE03054883.1;NbD042744.1	NbE03054883.1;NbD042744.1	2010
NbD046435.1;NbD043319.1	NbD046435.1;NbD043319.1	2031
NbD043492.1	NbD043492.1	2039
NbD051733.1;NbD043691.1;NbE05065307.1;NbE05066315.1	NbD051733.1;NbD043691.1	2047
NbD044403.1;NbE05067806.1	NbD044403.1;NbE05067806.1	2079
NbD044489.1	NbD044489.1	2086
NbD044609.1;NbE05063013.1;NbE44070943.1;NbD050310.1;NbD041688.1;NbD033593.1;NbD038763.1;NbE05063583.1;NbD018502.1;NbE44070154.1;NbE05064926.1;NbD013117.1;NbE03055146.1;NbE03055329.1;NbE44073746.1	NbD044609.1;NbE05063013.1	2092
NbE05067130.1;NbD045099.1	NbE05067130.1;NbD045099.1	2105
NbD045570.1	NbD045570.1	2121
NbD045703.1	NbD045703.1	2127
NbD045744.1	NbD045744.1	2128
NbD046040.1	NbD046040.1	2142
NbD046327.1	NbD046327.1	2156
NbD046450.1	NbD046450.1	2160
NbD046700.1;NbD031402.1	NbD046700.1;NbD031402.1	2171
NbD047811.1;NbD050162.1	NbD047811.1;NbD050162.1	2199
NbD048061.1;NbD048233.1;NbE05063227.1	NbD048061.1;NbD048233.1;NbE05063227.1	2210
NbD048309.1;NbD031046.1;NbE03061085.1;NbD037879.1	NbD048309.1;NbD031046.1	2218
NbD048677.1	NbD048677.1	2227
NbD048785.1	NbD048785.1	2231
NbD049321.1;NbE03061280.1;NbD043340.1	NbD049321.1;NbE03061280.1	2263
NbD049495.1;NbE03059875.1	NbD049495.1;NbE03059875.1	2269
NbD049528.1	NbD049528.1	2272
NbD050098.1;NbE44070733.1	NbD050098.1;NbE44070733.1	2290
NbD050436.1;NbE05067996.1;NbE03060979.1	NbD050436.1;NbE05067996.1	2305
NbD050869.1	NbD050869.1	2322
NbD051382.1	NbD051382.1	2341
NbD051574.1	NbD051574.1	2347
NbD052329.1;NbE44071763.1;NbD050814.1	NbD052329.1;NbE44071763.1;NbD050814.1	2373
NbD053078.1	NbD053078.1	2396
NbE03054981.1;NbD045669.1	NbE03054981.1;NbD045669.1	2417
NbE03055912.1;NbD008853.1	NbE03055912.1;NbD008853.1	2423
NbE03057383.1	NbE03057383.1	2433
NbE03059804.1;NbD015354.1	NbE03059804.1;NbD015354.1	2454
NbE44071730.1;NbE05063534.1;NbD051631.1	NbE44071730.1;NbE05063534.1	2482
NbE05065846.1	NbE05065846.1	2497
NbE05067569.1;NbE44069924.1;NbD004627.1	NbE05067569.1;NbE44069924.1;NbD004627.1	2508
NbE05068732.1;NbE03055267.1	NbE05068732.1	2513
NbE44070458.1;NbD048553.1	NbE44070458.1;NbD048553.1	2520
NbE44072991.1;NbD051893.1	NbE44072991.1;NbD051893.1	2534
NbE44073682.1;NbE03058429.1;NbD010900.1	NbE44073682.1;NbE03058429.1;NbD010900.1	2537

## Sheet: imputation and t-test AtRACK1a
a two-sided t-test for comparison between samples from AtRACK1a-PafA and GFP-PafA, with corrected false positive by permutation-based FDR calculation using thresholds FDR = 0.05 and S0 = 1.
Significant	#NAME?	Difference	Protein IDs	Majority protein IDs	id	Symbol color	Symbol type	Symbol size	Show label	Only identified by site	Reverse	Potential contaminant	Taxonomy IDs	Peptides	Razor + unique peptides	Unique peptides	Sequence coverage [%]	Unique + razor sequence coverage [%]	Unique sequence coverage [%]	Mol. weight [kDa]	Q-value	Score	Intensity	iBAQ peptides	MS/MS count	GFP_rep1	GFP_rep2	GFP_rep3	AtRACK_rep1	AtRACK_rep2	AtRACK_rep3
+	4.89346	8.49213	atRACK	atRACK	0	Color2 [DarkGray]	1	4					-1	26	26	26	52.9	52.9	52.9	35.747	0	323.31	212450000	20	497	14.5609	13.5099	14.3832	22.6136	22.6715	22.6453
+	5.89605	6.94543	NbD029299.1;NbE05063025.1;NbD010804.1;NbD010758.1;NbD022905.1;NbE05066957.1;NbD044351.1;NbD026178.1	NbD029299.1;NbE05063025.1;NbD010804.1;NbD010758.1;NbD022905.1;NbE05066957.1;NbD044351.1;NbD026178.1	1511	Color2 [DarkGray]	1	4					-1	5	5	5	36.8	36.8	36.8	17.523	0	94.943	19459000	8	26	14.0591	14.4475	13.9853	21.0406	21.1053	21.1823
+	4.30899	6.34481	NbD002190.1;NbD013740.1;NbE03056937.1	NbD002190.1;NbD013740.1;NbE03056937.1	121	Color2 [DarkGray]	1	4					-1	4	4	2	35	35	23.1	15.906	0	75.179	11514000	9	28	14.5555	13.5835	13.4888	20.2219	20.2334	20.2069
+	6.83826	5.59994	NbD005408.1	NbD005408.1	318	Color2 [DarkGray]	1	4					-1	11	11	4	30.2	30.2	14	48.449	0	318.05	20465000	16	65	14.3457	14.1461	14.1531	19.8618	19.8038	19.779
+	4.56457	5.23712	NbD040020.1	NbD040020.1	1933	Color2 [DarkGray]	1	4					-1	13	6	6	18.8	13	13	108.15	0	72.159	3356100	55	31	13.2533	13.4766	13.5904	18.5066	18.4084	19.1166
+	2.63482	4.50923	NbD023974.1	NbD023974.1	1261	Color2 [DarkGray]	1	4					-1	22	22	12	37.8	37.8	24.6	79.55	0	323.31	13249000	40	138	13.4955	12.9666	15.1364	18.3886	18.4186	18.3191
+	4.0982	4.4531	NbD002220.1	NbD002220.1	123	Color2 [DarkGray]	1	4					-1	34	34	11	78.1	78.1	32	44.847	0	323.31	34992000	23	172	14.6015	14.0081	14.9083	18.8667	18.9444	19.0662
+	3.5705	4.44529	NbD049495.1;NbE03059875.1	NbD049495.1;NbE03059875.1	2269	Color2 [DarkGray]	1	4					-1	9	9	5	23.4	23.4	12.8	58.006	0	169.41	7090100	18	43	14.2406	13.0741	14.076	18.1866	18.3403	18.1997
+	4.22318	4.33787	NbE44072991.1;NbD051893.1	NbE44072991.1;NbD051893.1	2534	Color2 [DarkGray]	1	4					-1	9	2	2	11.6	2.1	2.1	137.03	0	39.59	2452500	65	12	13.3657	13.2078	14.0061	17.8272	17.8634	17.9025
+	4.97769	4.32889	NbE05064168.1;NbD000166.1;NbE05064169.1	NbE05064168.1;NbD000166.1	14	Color2 [DarkGray]	1	4					-1	3	3	3	9.1	9.1	9.1	52.685	0	65.401	4103200	20	19	13.9437	13.9299	14.396	18.4205	18.3511	18.4847
+	4.57909	4.30956	NbD011790.1;NbD045030.1	NbD011790.1	673	Color2 [DarkGray]	1	4					-1	8	8	8	33.1	33.1	33.1	49.45	0	270.81	3694600	22	40	13.4576	14.0269	13.4432	17.859	17.9833	18.0142
+	3.87174	4.29108	NbD018100.1;NbD032229.1	NbD018100.1	997	Color2 [DarkGray]	1	4					-1	13	13	13	34.3	34.3	34.3	38.372	0	314.26	7790400	19	66	13.6266	12.9076	13.8958	17.8028	17.6896	17.8108
+	2.99376	4.21301	NbD003525.1;NbD013869.1;NbD004501.1;NbD010443.1	NbD003525.1;NbD013869.1;NbD004501.1;NbD010443.1	192	Color2 [DarkGray]	1	4					-1	6	6	2	24.1	24.1	14.5	28.291	0	87.61	2503400	9	23	13.4494	13.2288	14.7792	18.1476	17.8735	18.0752
+	8.1135	4.15357	NbD025064.1	NbD025064.1	1309	Color2 [DarkGray]	1	4					-1	18	2	2	43.1	6.3	6.3	58.698	0	24.181	2971800	32	18	14.0558	14.0764	14.1185	18.2379	18.208	18.2656
+	3.05798	4.13951	NbE03058149.1;NbD004083.1	NbE03058149.1;NbD004083.1	2439	Color2 [DarkGray]	1	4					-1	6	6	2	16.8	16.8	8.5	36.586	0	94.475	8373500	16	38	15.6857	15.4035	14.1781	19.1813	19.2001	19.3045
+	4.90059	4.05766	NbD035909.1;NbE44074431.1	NbD035909.1;NbE44074431.1	1768	Color2 [DarkGray]	1	4					-1	23	22	13	14	13.5	9.4	188.16	0	261.08	11495000	86	115	14.8397	14.5775	14.3104	18.6754	18.5904	18.6347
+	4.1446	4.04248	NbD053078.1	NbD053078.1	2396	Color2 [DarkGray]	1	4					-1	5	5	5	11.7	11.7	11.7	38.699	0	284.46	4053500	16	43	13.4018	13.9126	14.2169	17.9127	17.8378	17.9082
+	3.77833	3.99306	NbD021400.2;NbD021400.1;NbD021399.1	NbD021400.2;NbD021400.1;NbD021399.1	1151	Color2 [DarkGray]	1	4					-1	6	2	2	15.5	3.9	3.9	55.069	0	47.316	3399100	27	19	13.4905	14.1325	14.4655	18.0055	18.1347	17.9275
+	4.10296	3.97841	NbD003870.1;NbE03053355.1;NbD002890.1	NbD003870.1;NbE03053355.1;NbD002890.1	217	Color2 [DarkGray]	1	4					-1	4	4	4	10.4	10.4	10.4	70.907	0	92.5	2629100	35	24	14.0114	13.4933	14.2923	17.8406	17.8662	18.0253
+	4.28738	3.92414	NbE03057974.1;NbD006156.1	NbE03057974.1;NbD006156.1	361	Color2 [DarkGray]	1	4					-1	23	23	18	21.8	21.8	18.4	111.58	0	323.31	10413000	53	110	14.7191	14.3703	14.3557	18.5881	18.051	18.5784
+	2.70991	3.86101	NbD040415.1;NbD038247.1;NbE44069407.1;NbE03058410.1;NbE03054217.1;NbD043709.1	NbD040415.1;NbD038247.1;NbE44069407.1;NbE03058410.1;NbE03054217.1;NbD043709.1	1861	Color2 [DarkGray]	1	4					-1	2	2	1	6.3	6.3	3.7	49.568	0	39.436	3763700	16	23	14.2875	13.1557	14.9773	17.8898	18.0065	18.1072
+	4.60544	3.7716	NbE44072342.1	NbE44072342.1	2529	Color2 [DarkGray]	1	4					-1	63	16	0	66.4	21.9	0	107.76	0	323.31	17913000	57	112	15.7821	15.4256	15.1962	19.2526	19.242	19.224
+	4.29565	3.72128	NbD036440.1;NbD046539.1	NbD036440.1;NbD046539.1	1789	Color2 [DarkGray]	1	4					-1	9	9	4	49.2	49.2	25.6	28.095	0	188.29	3000300	14	34	13.9133	13.4052	13.2744	17.3269	17.2763	17.1535
+	3.86848	3.67902	NbD024579.1;NbE05063359.1	NbD024579.1;NbE05063359.1	1285	Color2 [DarkGray]	1	4					-1	13	4	4	20.6	7.3	7.3	100.37	0	27.681	2320800	56	17	14.4071	13.8624	13.5735	17.4777	17.6887	17.7136
+	4.77665	3.64897	NbD014326.1	NbD014326.1	811	Color2 [DarkGray]	1	4					-1	27	5	0	56.6	18.8	0	44.732	0	257.01	3683100	23	26	14.1211	13.7877	14.2418	17.6239	17.6502	17.8235
+	4.07848	3.64667	NbD048825.1;NbE03057646.1	NbD048825.1;NbE03057646.1	2233	Color2 [DarkGray]	1	4					-1	10	9	2	25.4	21.4	5.4	71.81	0	170.55	3299700	31	54	14.2196	13.5003	13.8846	17.6821	17.4435	17.419
+	2.02528	3.63336	NbD033440.1	NbD033440.1	1679	Color2 [DarkGray]	1	4					-1	21	13	4	34.9	22.6	4.7	72.9	0	323.31	7594900	37	122	11.9112	13.3273	14.4598	16.3922	17.0151	17.191
+	2.66353	3.60287	NbD019391.1	NbD019391.1	1064	Color2 [DarkGray]	1	4					-1	62	5	5	68.6	9.6	9.6	107.7	0	194.54	6653900	57	35	14.271	16.0438	15.1273	18.6735	18.7951	18.7822
+	4.27032	3.50693	NbD016943.1;NbD031589.1;NbD037388.1;NbD036571.1;NbD023451.1;NbD027710.1	NbD016943.1;NbD031589.1	941	Color2 [DarkGray]	1	4					-1	11	11	2	45.6	45.6	10.7	23.584	0	107.89	5203200	11	56	14.5732	13.921	14.158	17.7747	17.6751	17.7232
+	2.87955	3.50047	NbD046327.1	NbD046327.1	2156	Color2 [DarkGray]	1	4					-1	7	3	3	13.7	4.8	4.8	50.151	0	41.362	1758900	17	16	14.8368	13.3254	14.1064	17.5387	17.6278	17.6034
+	4.00027	3.48996	NbD031529.1;NbE05068423.1;NbD006299.1;NbE03057916.1;NbD020517.1	NbD031529.1;NbE05068423.1;NbD006299.1;NbE03057916.1;NbD020517.1	365	Color2 [DarkGray]	1	4					-1	4	4	4	17.9	17.9	17.9	25.154	0	37.903	1539200	17	20	13.9336	13.4627	13.2968	17.2911	16.9401	16.9318
+	3.10607	3.47975	NbD010151.1;NbD009589.1;NbD009588.1	NbD010151.1;NbD009589.1;NbD009588.1	559	Color2 [DarkGray]	1	4					-1	10	10	3	27.2	27.2	8	29.715	0	129.69	3169600	16	42	13.3323	12.9974	14.2629	17.0547	16.994	16.9831
+	7.06186	3.43149	NbD015511.1	NbD015511.1	869	Color2 [DarkGray]	1	4					-1	66	66	18	67.3	67.3	19.6	107.79	0	323.31	143900000	57	480	18.6277	18.5293	18.6465	22.0234	22.0222	22.0522
+	3.93097	3.42044	NbD028502.1;NbD049173.1;NbD006402.1;NbD000786.1;NbD011065.1	NbD028502.1;NbD049173.1;NbD006402.1;NbD000786.1	1470	Color2 [DarkGray]	1	4					-1	9	9	2	40	40	13.3	23.339	0	85.864	3233900	12	34	14.2178	14.1311	14.8552	17.835	17.8465	17.7839
+	4.01048	3.4028	NbD010243.1;NbE05064396.1;NbD007578.1	NbD010243.1;NbE05064396.1	586	Color2 [DarkGray]	1	4					-1	3	3	3	12.7	12.7	12.7	30.121	0	78.803	2279600	12	27	13.5714	14.1165	13.8999	16.9672	17.4091	17.4199
+	3.29485	3.36956	NbD025469.1;NbD024722.1;NbD023955.1;NbD011424.1;NbD041917.1;NbE03058825.1;NbE05065416.1	NbD025469.1;NbD024722.1;NbD023955.1;NbD011424.1;NbD041917.1;NbE03058825.1	1330	Color2 [DarkGray]	1	4					-1	8	2	2	34.4	13.7	13.7	24.792	0	35.689	2135600	7	19	13.7334	13.5587	14.6054	17.4321	17.3273	17.2468
+	2.84191	3.34471	NbD051686.1;NbD029155.1;NbD012968.1;NbD006401.1;NbD004560.1;NbD000411.1	NbD051686.1;NbD029155.1;NbD012968.1;NbD006401.1;NbD004560.1;NbD000411.1	257	Color2 [DarkGray]	1	4					-1	7	7	7	89.2	89.2	89.2	7.4666	0	63.337	10858000	3	45	14.4593	13.3329	14.5991	17.649	17.5964	17.18
+	3.35556	3.34072	NbD038896.1;NbD031906.1	NbD038896.1;NbD031906.1	1601	Color2 [DarkGray]	1	4					-1	9	2	2	27.2	8	8	29.77	0	41.676	2228200	16	21	14.0745	13.8571	14.8731	17.5032	17.6916	17.6321
+	4.87894	3.32855	NbE44070942.1	NbE44070942.1	2524	Color2 [DarkGray]	1	4					-1	17	17	0	12.6	12.6	0	156.74	0	323.31	12930000	68	78	15.693	15.737	16.0916	19.1575	19.2164	19.1334
+	5.25682	3.31709	NbD016173.1;NbD024435.1	NbD016173.1;NbD024435.1	902	Color2 [DarkGray]	1	4					-1	12	12	12	25.3	25.3	25.3	54.035	0	261.54	12390000	24	67	15.4876	15.4644	15.1719	18.6626	18.6914	18.721
+	5.65766	3.28887	NbE05065923.1;NbD040967.1	NbE05065923.1;NbD040967.1	1956	Color2 [DarkGray]	1	4					-1	8	5	5	14	10.7	10.7	88.739	0	78.591	1942200	36	17	14.1341	13.8612	14.0068	17.2708	17.3269	17.271
+	3.83856	3.28622	NbE05065846.1	NbE05065846.1	2497	Color2 [DarkGray]	1	4					-1	8	2	2	35	14.5	14.5	24.912	0	66.269	2378500	7	20	13.6439	14.365	13.7057	17.224	17.2117	17.1375
+	3.67405	3.26144	NbD021435.1	NbD021435.1	1154	Color2 [DarkGray]	1	4					-1	8	5	3	31.9	29.7	19.1	36.196	0	32.507	1058200	17	15	13.7213	14.2811	13.4241	17.1386	17.0592	17.013
+	1.60466	3.23894	NbD019774.1;NbD010796.1	NbD019774.1;NbD010796.1	612	Color2 [DarkGray]	1	4					-1	9	4	4	54.8	32.2	32.2	16.389	0	167.47	5707800	10	35	16.8561	14.4043	13.8638	18.2053	18.456	18.1797
+	5.12944	3.2003	NbD044787.1;NbD019389.1;NbD031076.1;NbD000101.1;NbD000396.1	NbD044787.1;NbD019389.1;NbD031076.1;NbD000101.1	1063	Color2 [DarkGray]	1	4					-1	5	5	5	10.2	10.2	10.2	65.403	0	90.41	2788000	24	32	13.9234	14.1331	14.2854	17.3348	17.3346	17.2733
+	5.81217	3.16207	NbE03060478.1;NbD034991.1	NbE03060478.1;NbD034991.1	1739	Color2 [DarkGray]	1	4					-1	7	7	4	14.9	14.9	8.7	52.337	0	158.21	2629500	16	41	14.0483	14.0235	13.8318	17.1143	17.1062	17.1695
+	3.24216	3.12909	NbD009316.1	NbD009316.1	537	Color2 [DarkGray]	1	4					-1	13	13	7	44	44	22.8	34.666	0	217.22	3658700	11	51	13.9974	13.6658	14.7066	17.3619	17.128	17.2672
+	5.31996	3.12457	NbE03055894.1;NbD042712.1;NbE44069083.1;NbD026458.1	NbE03055894.1;NbD042712.1;NbE44069083.1;NbD026458.1	2006	Color2 [DarkGray]	1	4					-1	6	6	6	10	10	10	78.178	0	87.493	2166000	40	23	14.2159	14.1028	14.3895	17.4116	17.3937	17.2766
+	4.65735	3.12019	NbD002963.1;NbD015297.1	NbD002963.1;NbD015297.1	157	Color2 [DarkGray]	1	4					-1	14	14	3	44.2	44.2	15.8	44.696	0	240.15	10444000	19	83	15.4192	15.3519	15.7524	18.512	18.7009	18.6712
+	2.53664	3.11816	NbD029200.1;NbD028565.1	NbD029200.1;NbD028565.1	1474	Color2 [DarkGray]	1	4					-1	5	5	3	29.5	29.5	18.9	13.628	0	45.023	1622300	7	20	13.0927	14.5025	13.0866	16.8076	16.4931	16.7356
+	5.40418	3.11508	NbD013541.1;NbE03057304.1	NbD013541.1;NbE03057304.1	762	Color2 [DarkGray]	1	4					-1	18	18	10	22	22	15.4	142.31	0	269.03	3725200	64	73	13.5509	13.4873	13.3387	16.6902	16.475	16.557
+	3.2155	3.10734	NbD005751.1	NbD005751.1	338	Color2 [DarkGray]	1	4					-1	11	11	5	35	35	28.2	32.31	0	159.07	5123800	21	55	13.9621	14.4607	14.9897	17.778	17.3893	17.5673
+	2.78735	3.08973	NbE44072063.1;NbD017939.1;NbD017850.1;NbD033514.1;NbD046729.1	NbE44072063.1;NbD017939.1;NbD017850.1;NbD033514.1	983	Color2 [DarkGray]	1	4					-1	4	4	4	13.9	13.9	13.9	32.598	0	27.464	1988800	9	21	14.248	13.7281	15.1253	17.4505	17.4908	17.4294
+	2.60253	3.07624	NbD040165.1	NbD040165.1	1939	Color2 [DarkGray]	1	4					-1	2	2	1	12.5	12.5	7.3	30.991	0	37.609	1961700	17	14	13.9295	15.2758	13.9177	17.5153	17.5108	17.3255
+	4.35764	3.06505	NbD043694.1;NbD041460.1;NbD016868.1;NbD048288.1;NbD029946.1	NbD043694.1;NbD041460.1;NbD016868.1;NbD048288.1;NbD029946.1	933	Color2 [DarkGray]	1	4					-1	7	7	1	37.3	37.3	10.7	16.345	0	104.55	3695400	6	30	14.596	14.1977	14.1074	17.3041	17.3153	17.4767
+	3.03633	3.05592	NbD022454.1;NbD000971.1;NbD001902.1;NbD009944.1	NbD022454.1;NbD000971.1;NbD001902.1	50	Color2 [DarkGray]	1	4					-1	10	10	4	42.8	42.8	19.6	21.975	0	132.67	4053800	10	59	13.5548	13.7048	14.6249	17.2029	16.9098	16.9395
+	2.70422	3.0113	NbD003818.1;NbE44072656.1;NbD038573.1;NbE05067836.1;NbD020504.1;NbE03059078.1;NbD044148.1;NbD025859.1	NbD003818.1;NbE44072656.1	211	Color2 [DarkGray]	1	4					-1	22	4	4	54.2	10.2	10.2	46.88	0	107.69	1796100	23	15	14.9799	13.6724	14.7818	17.3018	17.5351	17.631
+	3.49401	3.00524	NbD009891.1;NbE44071173.1;NbD005399.1;NbE03060874.1	NbD009891.1;NbE44071173.1;NbD005399.1;NbE03060874.1	573	Color2 [DarkGray]	1	4					-1	3	3	3	10.2	10.2	10.2	32.586	0	26.594	1813500	11	18	13.8088	14.6924	14.0976	17.2012	17.2027	17.2106
+	3.87314	3.00235	NbD050098.1;NbE44070733.1	NbD050098.1;NbE44070733.1	2290	Color2 [DarkGray]	1	4					-1	5	5	2	11	11	4.1	77.8	0	124.27	2015900	36	26	13.9908	13.785	14.485	17.0726	17.1101	17.0851
+	3.17208	2.98985	NbE03055354.1;NbD035299.1;NbD050759.1;NbD015477.1	NbE03055354.1;NbD035299.1;NbD050759.1;NbD015477.1	1750	Color2 [DarkGray]	1	4					-1	3	3	3	8.8	8.8	8.8	56.443	0	86.376	1753700	25	17	13.7196	14.4589	14.775	17.2749	17.3133	17.3349
+	1.87594	2.98837	NbD031876.1;NbE03053928.1;NbD021838.1	NbD031876.1;NbE03053928.1	1600	Color2 [DarkGray]	1	4					-1	6	6	6	16	16	16	65.329	0	113.1	3549200	26	39	13.9926	16.2572	14.3417	17.7631	17.8732	17.9202
+	4.92774	2.98375	NbE44073682.1;NbE03058429.1;NbD010900.1	NbE44073682.1;NbE03058429.1;NbD010900.1	2537	Color2 [DarkGray]	1	4					-1	31	31	17	27.9	27.9	18	195.57	0	323.31	8964700	88	125	14.1378	14.0711	14.4332	17.194	17.1772	17.2221
+	2.97182	2.9665	NbE44071730.1;NbE05063534.1;NbD051631.1	NbE44071730.1;NbE05063534.1	2482	Color2 [DarkGray]	1	4					-1	6	4	0	6.8	4.1	0	130.49	0	59.041	1917700	63	28	13.5134	13.5997	14.6009	16.8133	16.9218	16.8783
+	3.3836	2.9541	NbD005717.1	NbD005717.1	335	Color2 [DarkGray]	1	4					-1	8	8	1	23.1	23.1	3.3	44.41	0	96.92	2806200	24	41	14.923	14.0744	14.1388	17.3373	17.3143	17.3468
+	1.21	2.90734	NbD049064.1;NbD044174.1	NbD049064.1;NbD044174.1	2071	Color2 [DarkGray]	1	4					-1	6	6	5	61.8	61.8	60	12.398	0	302.47	5638300	6	40	17.2935	13.6403	14.2689	17.9284	18.0886	17.9077
+	3.10447	2.88492	NbD002901.1	NbD002901.1	154	Color2 [DarkGray]	1	4					-1	5	5	1	19.7	19.7	3.8	29.888	0	159.26	2401300	16	29	14.2976	13.8162	14.8956	17.2948	17.1588	17.2107
+	2.86443	2.87956	NbD012644.1	NbD012644.1	717	Color2 [DarkGray]	1	4					-1	8	8	2	34.1	34.1	13.3	24.673	0	142.42	3657400	7	45	13.9238	13.7315	14.8989	17.0784	17.1146	16.9999
+	5.18548	2.86195	NbD045703.1	NbD045703.1	2127	Color2 [DarkGray]	1	4					-1	12	2	2	35.6	11.4	11.4	44.698	0	31.257	1542700	19	13	14.1021	14.3498	14.3496	17.2023	17.0571	17.128
+	3.1992	2.85212	NbD051382.1	NbD051382.1	2341	Color2 [DarkGray]	1	4					-1	4	4	4	5.7	5.7	5.7	118.64	0	47.826	1606200	61	24	13.828	13.119	14.1059	16.5342	16.5554	16.5197
+	3.6462	2.81826	NbD007349.1;NbE05065600.1;NbD004400.1;NbE44071167.1;NbD030130.1	NbD007349.1	426	Color2 [DarkGray]	1	4					-1	5	5	1	22	22	7.4	36.114	0	56.182	3359600	17	40	14.9216	15.3301	14.8884	17.5449	17.9159	18.134
+	3.66451	2.78941	NbD022620.1	NbD022620.1	1206	Color2 [DarkGray]	1	4					-1	27	27	0	55.5	55.5	0	61.213	0	323.31	15219000	42	136	15.3509	15.3355	15.9856	18.4291	18.2865	18.3246
+	4.07164	2.78213	NbD022585.1;NbD014268.1;NbD029831.1;NbD007551.1;NbE44070061.1;NbD011520.1;NbD022584.1;NbE03054593.1	NbD022585.1;NbD014268.1;NbD029831.1;NbD007551.1;NbE44070061.1;NbD011520.1	1204	Color2 [DarkGray]	1	4					-1	9	9	9	53.5	53.5	53.5	16.238	0	64.156	2224900	8	29	13.8298	14.2928	13.739	16.7519	16.732	16.7241
+	3.52334	2.72951	NbD042159.1;NbD021396.1	NbD042159.1;NbD021396.1	1150	Color2 [DarkGray]	1	4					-1	9	9	5	46.9	46.9	22.8	25.108	0	167.2	4233200	10	61	14.2348	14.5829	13.7872	16.9827	16.9308	16.8799
+	3.18446	2.72527	NbD040743.1;NbD048058.1;NbD042343.1;NbD019568.1;NbD040438.1	NbD040743.1;NbD048058.1;NbD042343.1;NbD019568.1;NbD040438.1	1073	Color2 [DarkGray]	1	4					-1	4	4	2	24.4	24.4	16.9	19.309	0	63.145	2643400	9	29	14.1329	15.0129	14.2332	17.2826	17.178	17.0943
+	3.08571	2.71419	NbD004937.1	NbD004937.1	280	Color2 [DarkGray]	1	4					-1	8	8	8	13.7	13.7	13.7	57.401	0	269.71	4810000	20	56	14.4905	14.1571	15.1737	17.3199	17.3022	17.3418
+	3.61568	2.69411	NbD008377.1;NbE05065732.1	NbD008377.1;NbE05065732.1	481	Color2 [DarkGray]	1	4					-1	13	8	8	13.1	9.6	9.6	110.42	0	112.72	2721700	54	32	14.7079	14.0732	14.0425	16.957	16.9872	16.9617
+	3.12002	2.69237	NbD017820.1	NbD017820.1	980	Color2 [DarkGray]	1	4					-1	6	1	1	23.1	5	5	29.395	0	13.778	1964900	16	12	14.0434	14.9726	14.1723	17.0604	17.1089	17.0961
+	3.54783	2.65085	NbD029764.1	NbD029764.1	1532	Color2 [DarkGray]	1	4					-1	6	1	1	26	4.7	4.7	29.184	0.0021825	6.8234	1304900	15	12	13.2996	13.9822	13.9455	16.392	16.3652	16.4226
+	2.6691	2.61404	NbD035602.1;NbD032143.1;NbD022562.1;NbD013219.1	NbD035602.1;NbD032143.1;NbD022562.1;NbD013219.1	1201	Color2 [DarkGray]	1	4					-1	2	1	1	8.8	5.4	5.4	50.736	0	34.041	1153400	20	13	14.6847	13.5918	13.6152	16.6882	16.403	16.6426
+	2.21505	2.61273	NbE05066340.1;NbD041659.1	NbE05066340.1;NbD041659.1	1979	Color2 [DarkGray]	1	4					-1	11	11	3	14.6	14.6	5.8	92.921	0	106.27	2783200	40	54	14.8317	13.1618	14.2618	16.7985	16.6847	16.6102
+	3.63729	2.56551	NbD027495.1;NbD022849.1	NbD027495.1;NbD022849.1	1215	Color2 [DarkGray]	1	4					-1	2	2	2	5.9	5.9	5.9	58.978	0	19.407	1324000	33	16	14.1133	14.5354	13.8684	16.6987	16.6576	16.8573
+	2.67413	2.564	NbE05065398.1;NbD046197.1;NbD019649.1;NbD017004.1	NbE05065398.1;NbD046197.1;NbD019649.1;NbD017004.1	1076	Color2 [DarkGray]	1	4					-1	4	4	4	41	41	41	8.8479	0	159.15	3858400	4	27	14.1168	15.1029	15.2499	17.249	17.4902	17.4225
+	4.21414	2.51216	NbE03060074.1;NbD030848.1	NbE03060074.1;NbD030848.1	1567	Color2 [DarkGray]	1	4					-1	23	9	9	20.5	11	11	193.07	0	231.76	2763900	86	39	14.6997	14.2325	14.3724	16.9319	16.8963	17.0129
+	1.3001	2.48055	NbD004040.1	NbD004040.1	229	Color2 [DarkGray]	1	4					-1	10	3	3	11	1.6	1.6	135.17	0	52.086	1430900	67	21	13.7242	15.9593	12.9885	16.6465	16.6896	16.7775
+	3.57281	2.4767	NbD045744.1	NbD045744.1	2128	Color2 [DarkGray]	1	4					-1	9	9	4	17.4	17.4	8.5	50.315	0	67.575	1941800	18	32	14.4044	13.9948	14.6922	16.824	16.8996	16.7979
+	4.09236	2.47031	NbE03059461.1;NbD046938.1;NbE03054676.1;NbD042537.1	NbE03059461.1;NbD046938.1;NbE03054676.1;NbD042537.1	2001	Color2 [DarkGray]	1	4					-1	3	3	3	5.7	5.7	5.7	112.15	0	46.825	1048900	60	15	14.0193	13.8006	13.5207	16.1646	16.2882	16.2988
+	1.54886	2.46083	NbD008379.1	NbD008379.1	482	Color2 [DarkGray]	1	4					-1	6	6	6	18.5	18.5	18.5	49.131	0	253.85	1647700	30	26	13.5677	12.897	15.3149	16.2034	16.6341	16.3247
+	5.05324	2.44539	NbE05064444.1;NbD048267.1	NbE05064444.1;NbD048267.1	2216	Color2 [DarkGray]	1	4					-1	33	33	16	21.5	21.5	10.1	202.44	0	323.31	27643000	95	188	16.5261	16.5897	16.7987	19.1034	19.0384	19.1088
+	3.48386	2.43892	NbD024468.1	NbD024468.1	1281	Color2 [DarkGray]	1	4					-1	14	14	3	52.6	52.6	16.3	36.579	0	323.31	10376000	17	96	15.8644	15.2385	15.882	18.134	18.0742	18.0935
+	1.99844	2.43326	NbD013144.1;NbD003598.1;NbD049416.1;NbD046368.1	NbD013144.1;NbD003598.1;NbD049416.1;NbD046368.1	197	Color2 [DarkGray]	1	4					-1	6	6	6	33.1	33.1	33.1	20.013	0	61.407	1962700	8	22	13.9248	13.473	15.1505	16.9184	16.3317	16.598
+	3.30218	2.41142	NbE03055346.1;NbD025915.1	NbE03055346.1;NbD025915.1	1356	Color2 [DarkGray]	1	4					-1	15	5	4	23.7	10.2	8.9	84.923	0	42.197	1657900	48	23	14.4638	13.8601	14.6158	16.798	16.6742	16.7016
+	3.14862	2.38349	NbD052329.1;NbE44071763.1;NbD050814.1	NbD052329.1;NbE44071763.1;NbD050814.1	2373	Color2 [DarkGray]	1	4					-1	4	4	4	7.1	7.1	7.1	104.36	0	27.741	791240	47	21	13.1002	13.8015	13.0335	15.6457	15.6225	15.8175
+	2.70732	2.37151	NbD042148.1;NbD031067.1	NbD042148.1;NbD031067.1	1580	Color2 [DarkGray]	1	4					-1	3	3	3	3.6	3.6	3.6	135.28	0	30.465	780440	61	12	13.9842	14.4927	13.3758	16.2037	16.3457	16.4177
+	4.17631	2.36491	NbD020850.1;NbD025259.1	NbD020850.1	1118	Color2 [DarkGray]	1	4					-1	4	4	3	30.3	30.3	19.1	17.239	0	42.457	2075600	7	24	14.0406	13.7406	14.0585	16.2338	16.4922	16.2085
+	2.48366	2.362	NbE05068254.1;NbD025457.1	NbE05068254.1;NbD025457.1	1328	Color2 [DarkGray]	1	4					-1	17	10	10	21.5	15	15	142.47	0	193.13	2703900	62	60	14.7555	13.7085	13.5688	16.3445	16.3305	16.4437
+	3.184	2.33257	NbD028335.1	NbD028335.1	1461	Color2 [DarkGray]	1	4					-1	9	9	4	28.6	28.6	13	39.711	0	65.998	1513100	24	34	13.647	14.3921	13.6982	16.178	16.2844	16.2726
+	2.63564	2.29256	NbD049321.1;NbE03061280.1;NbD043340.1	NbD049321.1;NbE03061280.1	2263	Color2 [DarkGray]	1	4					-1	3	3	1	11.8	11.8	5	29.197	0	24.991	708560	13	13	14.4829	13.3736	13.7291	16.1988	16.0378	16.2266
+	2.5579	2.2835	NbD019734.1;NbD044430.1;NbD019732.1	NbD019734.1;NbD044430.1;NbD019732.1	1081	Color2 [DarkGray]	1	4					-1	7	7	4	31.5	31.5	24.6	30.244	0	98.906	972630	15	15	14.3193	13.4003	13.4248	16.3084	15.7194	15.9671
+	1.77158	2.28212	NbE05064534.1;NbD008707.1	NbE05064534.1;NbD008707.1	504	Color2 [DarkGray]	1	4					-1	7	3	3	24.6	9.5	9.5	42.085	0	161.02	2065600	22	16	13.8119	15.3656	13.4938	16.4629	16.5494	16.5053
+	3.08017	2.27602	NbE03055907.1;NbD020699.1	NbE03055907.1;NbD020699.1	1115	Color2 [DarkGray]	1	4					-1	19	19	11	26.3	26.3	13	125.66	0	306.92	5784000	66	95	14.3068	14.9376	15.1375	17.0607	17.0265	17.1228
+	2.87305	2.26183	NbD048061.1;NbD048233.1;NbE05063227.1	NbD048061.1;NbD048233.1;NbE05063227.1	2210	Color2 [DarkGray]	1	4					-1	2	2	2	4.4	4.4	4.4	66.103	0	21.093	714580	40	12	13.4422	14.402	13.7536	16.1	16.1729	16.1104
+	3.33451	2.25471	NbD020341.1	NbD020341.1	1096	Color2 [DarkGray]	1	4					-1	8	1	1	20.4	3.2	3.2	63.364	0	36.585	909500	29	12	13.7704	13.5567	14.2733	16.0619	16.1491	16.1535
+	3.86102	2.25178	NbD044403.1;NbE05067806.1	NbD044403.1;NbE05067806.1	2079	Color2 [DarkGray]	1	4					-1	4	3	2	18.9	13.9	8.6	36.809	0	24.403	821400	17	13	13.8563	14.3324	13.8837	16.2363	16.3336	16.2578
+	2.1533	2.24607	NbD011824.1;NbD051455.1	NbD011824.1;NbD051455.1	675	Color2 [DarkGray]	1	4					-1	6	3	3	25.5	18.5	18.5	30.037	0	44.473	2390200	15	34	13.3811	14.6189	14.7588	16.5594	16.5476	16.3901
+	2.43273	2.2414	NbD039357.1;NbD039356.1	NbD039357.1;NbD039356.1	1903	Color2 [DarkGray]	1	4					-1	10	10	1	56.6	56.6	8.4	16.029	0	185.1	6720500	10	49	14.5887	15.3942	15.6785	17.6905	17.568	17.1272
+	2.19328	2.2239	NbD046070.1;NbD013798.1;NbD010028.1;NbD005951.1;NbD041065.1	NbD046070.1;NbD013798.1;NbD010028.1;NbD005951.1;NbD041065.1	351	Color2 [DarkGray]	1	4					-1	11	1	0	50	10.9	0	17.759	0	27.278	993950	7	14	14.3045	15.2033	13.7517	16.6119	16.5816	16.7377
+	1.86923	2.20586	NbD044609.1;NbE05063013.1;NbE44070943.1;NbD050310.1;NbD041688.1;NbD033593.1;NbD038763.1;NbE05063583.1;NbD018502.1;NbE44070154.1;NbE05064926.1;NbD013117.1;NbE03055146.1;NbE03055329.1;NbE44073746.1	NbD044609.1;NbE05063013.1	2092	Color2 [DarkGray]	1	4					-1	11	10	10	11	10.2	10.2	144.05	0	125.47	1913900	55	35	14.9089	13.3462	14.9047	16.4826	16.6602	16.6345
+	1.61523	2.17422	NbD045853.1;NbD020960.1;NbE44070163.1;NbE05064062.1	NbD045853.1;NbD020960.1;NbE44070163.1;NbE05064062.1	1128	Color2 [DarkGray]	1	4					-1	7	7	7	13.9	13.9	13.9	59.828	0	243.21	1833400	27	29	16.0756	14.5782	14.055	16.8795	17.2741	17.0779
+	2.32833	2.16972	NbD001333.1;NbD007942.1;NbE03060837.1;NbE03062469.1	NbD001333.1;NbD007942.1;NbE03060837.1;NbE03062469.1	71	Color2 [DarkGray]	1	4					-1	1	1	1	6.3	6.3	6.3	30.096	0	28.437	1028200	12	12	14.0485	14.9951	13.7621	16.3489	16.5972	16.3687
+	3.10932	2.12109	NbD003333.1	NbD003333.1	180	Color2 [DarkGray]	1	4					-1	10	5	5	21.2	8.9	8.9	59.731	0	55.146	979710	27	18	14.7989	14.0995	14.1304	16.5197	16.402	16.4704
+	4.11468	2.10986	NbD036879.1;NbD051964.1;NbD017731.1	NbD036879.1	1809	Color2 [DarkGray]	1	4					-1	7	7	7	10.7	10.7	10.7	76.965	0	88.722	1199400	42	23	13.9983	14.3539	14.2564	16.2476	16.2386	16.4522
+	1.23426	2.10879	NbD038738.1	NbD038738.1	1876	Color2 [DarkGray]	1	4					-1	6	5	1	24.7	24.7	6.6	31.601	0	73.468	2084000	18	31	13.7346	13.8765	16.2063	16.7025	16.6479	16.7934
+	3.25416	2.10526	NbE05068122.1;NbD045394.1;NbD004375.1;NbD010161.1;NbD035088.1;NbE44073814.1	NbE05068122.1;NbD045394.1;NbD004375.1	246	Color2 [DarkGray]	1	4					-1	3	3	0	5.5	5.5	0	97.361	0	55.296	1083800	44	22	14.2306	13.8656	13.5142	16.0233	15.9992	15.9036
+	1.24213	2.08398	NbD019269.1	NbD019269.1	1057	Color2 [DarkGray]	1	4					-1	5	5	5	10.7	10.7	10.7	61.442	0	48.671	1519000	26	22	13.8996	14.2529	16.4192	16.9275	16.9756	16.9206
+	4.30967	2.06552	NbE03060453.1;NbD018548.1	NbE03060453.1;NbD018548.1	1021	Color2 [DarkGray]	1	4					-1	3	2	1	14.1	10	5.3	36.959	0	37.206	996800	20	12	14.5425	14.4847	14.1999	16.4167	16.5315	16.4755
+	3.79749	2.05231	NbD048716.1;NbD037391.1;NbE44073564.1;NbE05068163.1;NbD046159.1	NbD048716.1;NbD037391.1;NbE44073564.1	1823	Color2 [DarkGray]	1	4					-1	14	14	14	12	12	12	118.81	0	185.76	7137900	49	74	15.8155	15.9937	16.0221	17.8818	18.2628	17.8436
+	2.74849	2.04459	NbD001415.1;NbE05065485.1;NbD015542.1	NbD001415.1;NbE05065485.1	76	Color2 [DarkGray]	1	4					-1	3	3	1	5.9	5.9	3	102.14	0	25.867	1064900	45	17	13.6127	14.0507	14.5597	16.1361	16.1778	16.043
+	3.14427	2.04291	NbD046700.1;NbD031402.1	NbD046700.1;NbD031402.1	2171	Color2 [DarkGray]	1	4					-1	4	4	4	16.4	16.4	16.4	41.205	0	35.581	643810	18	13	14.1075	14.7227	14.1294	16.2749	16.2865	16.5269
+	4.63052	2.03311	NbD027867.1;NbE03058222.1;NbD031858.1;NbE03056429.1	NbD027867.1;NbE03058222.1;NbD031858.1	1439	Color2 [DarkGray]	1	4					-1	7	6	6	8.6	7.8	7.8	173.41	0	117.27	1190700	79	25	13.8246	14.1278	13.9226	15.9606	16.0098	16.0039
+	2.48901	2.03074	NbD039165.1;NbD012404.1	NbD039165.1;NbD012404.1	704	Color2 [DarkGray]	1	4					-1	6	6	6	18.3	18.3	18.3	51.188	0	44.397	1438200	28	29	14.2991	14.6554	13.562	16.2296	16.1789	16.2002
+	1.3714	2.02075	NbE03061005.1;NbD001486.1;NbD014314.1	NbE03061005.1;NbD001486.1;NbD014314.1	81	Color2 [DarkGray]	1	4					-1	2	2	2	6.2	6.2	6.2	26.928	0	14.606	1388800	13	15	16.4662	14.2355	14.6288	17.1484	17.0741	17.1703
+	4.49702	2.01669	NbD031784.1;NbD028515.1;NbD010643.1;NbD010400.1;NbD007887.1;NbD042990.1	NbD031784.1;NbD028515.1;NbD010643.1;NbD010400.1;NbD007887.1;NbD042990.1	456	Color2 [DarkGray]	1	4					-1	4	4	4	35.8	35.8	35.8	13.768	0	31.785	1892300	4	25	14.3716	14.4942	14.1962	16.3996	16.2838	16.4288
+	2.91573	2.01635	NbD026839.1;NbE05063410.1;NbE03056560.1	NbD026839.1;NbE05063410.1;NbE03056560.1	1389	Color2 [DarkGray]	1	4					-1	10	7	2	9.2	7.8	3.3	209.03	0	54.215	1323600	92	31	13.9621	14.4902	14.7793	16.4505	16.5149	16.3153
+	2.40944	2.00108	NbD023087.1;NbD007725.1;NbE05063828.1;NbD045001.1;NbD043780.1	NbD023087.1;NbD007725.1;NbE05063828.1;NbD045001.1;NbD043780.1	444	Color2 [DarkGray]	1	4					-1	4	4	3	37.6	37.6	30.1	15.243	0	29.661	839180	7	15	13.6388	13.4657	14.5314	15.7838	15.9096	15.9457
+	0.662875	1.97448	NbD029578.1;NbE05067733.1	NbD029578.1;NbE05067733.1	1517	Color2 [DarkGray]	1	4					-1	20	2	2	41.8	3.6	3.6	55.41	0	50.461	2507200	21	16	13.9523	13.8316	17.9252	17.4202	17.0254	17.187
+	2.80471	1.97394	NbE44070458.1;NbD048553.1	NbE44070458.1;NbD048553.1	2520	Color2 [DarkGray]	1	4					-1	17	17	17	40.9	40.9	40.9	62.987	0	287.8	2735600	29	55	14.0089	14.8503	14.4619	16.4812	16.5187	16.243
+	2.51982	1.96343	NbD028652.1;NbD022971.1;NbD001068.1;NbE03061671.1	NbD028652.1;NbD022971.1;NbD001068.1;NbE03061671.1	56	Color2 [DarkGray]	1	4					-1	3	3	3	25.2	25.2	25.2	11.77	0	59.625	2256100	6	29	14.1665	14.4869	15.1924	16.619	16.6193	16.4978
+	3.06074	1.93787	NbD050817.1;NbD040573.1;NbD019471.1;NbD018428.1;NbE05065820.1;NbD034970.1;NbE44073433.1;NbE03060055.1;NbD020181.1;NbD020182.1	NbD050817.1;NbD040573.1;NbD019471.1;NbD018428.1;NbE05065820.1;NbD034970.1;NbE44073433.1;NbE03060055.1;NbD020181.1	1013	Color2 [DarkGray]	1	4					-1	3	3	3	34.6	34.6	34.6	14.79	0	28.635	818160	8	16	14.0263	13.8571	13.3148	15.6558	15.6238	15.7322
+	2.0128	1.92654	NbD007175.1;NbE03060263.1	NbD007175.1;NbE03060263.1	413	Color2 [DarkGray]	1	4					-1	8	2	2	6.4	2.7	2.7	152.38	0	118.11	849480	64	17	14.6931	15.1351	13.7338	16.5001	16.3872	16.4545
+	1.7828	1.91733	NbD033387.1	NbD033387.1	1674	Color2 [DarkGray]	1	4					-1	6	1	1	16.7	5.4	5.4	66.247	0	22.214	1474300	30	15	13.6176	13.4852	14.9801	15.8135	16.0388	15.9826
+	2.14031	1.90441	NbD014013.1	NbD014013.1	786	Color2 [DarkGray]	1	4					-1	10	10	3	17.7	17.7	6	109.32	0	72.929	1630000	58	29	14.9488	13.6495	14.2005	16.1259	16.1826	16.2035
+	1.43458	1.90031	NbD038829.1;NbE44069782.1	NbD038829.1	1882	Color2 [DarkGray]	1	4					-1	8	8	5	31.9	31.9	24.2	35.198	0	173.04	4927900	20	43	17.1299	15.0318	15.7528	17.876	17.8233	17.9161
+	2.73956	1.87315	NbD039705.1;NbD011842.1	NbD039705.1;NbD011842.1	678	Color2 [DarkGray]	1	4					-1	3	3	3	36.3	36.3	36.3	13.82	0	35.105	1273400	4	19	14.0559	14.9352	14.4803	16.3575	16.4024	16.331
+	2.77836	1.86437	NbE44070901.1;NbD006163.1	NbE44070901.1;NbD006163.1	2523	Color2 [DarkGray]	1	4					-1	10	10	10	40.7	40.7	40.7	50.008	0	211.96	4144100	30	46	15.4414	14.7463	15.4715	17.1923	16.9475	17.1125
+	2.00214	1.85386	NbE05068732.1;NbE03055267.1	NbE05068732.1	2513	Color2 [DarkGray]	1	4					-1	5	5	5	9.2	9.2	9.2	71.653	0	43.965	986160	17	23	13.9865	14.7554	13.3721	15.8196	15.9013	15.9547
+	0.966178	1.84476	NbD052374.1	NbD052374.1	2375	Color2 [DarkGray]	1	4					-1	3	2	2	7.2	5	5	67.538	0	73.649	1883500	31	18	16.5187	13.4998	14.4176	16.5849	16.6806	16.705
+	3.17085	1.84213	NbD002583.1;NbE05068690.1;NbD005526.1	NbD002583.1;NbE05068690.1;NbD005526.1	136	Color2 [DarkGray]	1	4					-1	7	7	7	11.6	11.6	11.6	100.32	0	75.486	1795000	50	36	14.2146	14.6953	14.7852	16.2532	16.4829	16.4854
+	3.03296	1.83702	NbE05066373.1;NbD042535.1;NbE44069436.1;NbD042714.1	NbE05066373.1;NbD042535.1;NbE44069436.1;NbD042714.1	2000	Color2 [DarkGray]	1	4					-1	5	5	2	13.5	13.5	6.2	59.351	0	83.527	1176600	35	21	14.1983	14.7287	14.0697	16.1613	16.2689	16.0774
+	3.82237	1.83565	NbD001875.1	NbD001875.1	103	Color2 [DarkGray]	1	4					-1	5	5	5	52.2	52.2	52.2	20.618	0	64.977	907070	14	20	13.9723	14.3694	14.0207	15.8853	15.9643	16.0197
+	1.87809	1.82722	NbD023811.1	NbD023811.1	1252	Color2 [DarkGray]	1	4					-1	4	1	1	28.1	4.7	4.7	32.198	0.0010554	9.9872	695720	21	12	15.0348	13.8673	13.7079	15.8675	16.2209	16.0032
+	2.98604	1.81883	NbD039406.1;NbE44071008.1	NbD039406.1;NbE44071008.1	1905	Color2 [DarkGray]	1	4					-1	10	10	7	16.4	16.4	13.6	99.626	0	96.562	2000100	43	32	14.6484	13.9113	14.253	16.0886	16.0983	16.0822
+	3.2132	1.81571	NbE03055912.1;NbD008853.1	NbE03055912.1;NbD008853.1	2423	Color2 [DarkGray]	1	4					-1	14	14	4	13.1	13.1	4.8	171.51	0	151.66	2762500	84	63	14.1787	13.7252	14.3387	15.9394	15.8485	15.9019
+	1.86856	1.81064	NbD041400.1;NbE44074001.1;NbE05063700.1;NbE05066933.1	NbD041400.1;NbE44074001.1;NbE05063700.1	1969	Color2 [DarkGray]	1	4					-1	7	7	2	11.4	11.4	4.7	78.581	0	63.213	1566000	33	22	14.5118	15.6206	14.2171	16.5091	16.6112	16.6611
+	1.45929	1.80973	NbE05068523.1;NbD006562.1	NbE05068523.1	2512	Color2 [DarkGray]	1	4					-1	3	3	2	15.2	15.2	9.9	34.289	0	27.502	1530400	18	25	15.3874	15.5104	13.7253	16.6968	16.6672	16.6882
+	5.77817	1.79383	NbD016376.1	NbD016376.1	911	Color2 [DarkGray]	1	4					-1	12	12	7	18.4	18.4	6.3	59.589	0	323.31	4920900	26	73	15.5924	15.6072	15.6123	17.3179	17.4518	17.4238
+	1.93597	1.79263	NbD024195.1;NbD048979.1;NbD038334.1	NbD024195.1;NbD048979.1;NbD038334.1	1269	Color2 [DarkGray]	1	4					-1	2	1	1	15.1	10.1	10.1	20.498	0	14.484	887210	10	14	14.7817	13.6154	14.5849	16.4442	16.1215	15.7942
+	2.22787	1.78589	NbE03057383.1	NbE03057383.1	2433	Color2 [DarkGray]	1	4					-1	12	12	4	16.2	16.2	6	133.21	0	229.69	2117900	62	51	14.2077	13.8335	14.9674	16.0848	16.1196	16.1619
+	2.14784	1.78463	NbE03054981.1;NbD045669.1	NbE03054981.1;NbD045669.1	2417	Color2 [DarkGray]	1	4					-1	7	7	3	9.1	9.1	4.7	195.03	0	89.321	1206900	82	28	13.8464	13.5597	14.7185	15.7302	15.8646	15.8836
+	3.98419	1.77356	NbD050869.1	NbD050869.1	2322	Color2 [DarkGray]	1	4					-1	3	3	1	31.8	31.8	12.2	16.464	0	28.272	964610	7	20	14.1294	13.8055	13.8345	15.7965	15.6331	15.6606
+	2.23284	1.74428	NbD036341.1	NbD036341.1	1783	Color2 [DarkGray]	1	4					-1	10	2	2	25	4.8	4.8	70.956	0	26.277	551270	29	11	14.6706	13.8179	14.8477	16.3234	16.0873	16.1584
+	2.39462	1.73364	NbD031450.1	NbD031450.1	1592	Color2 [DarkGray]	1	4					-1	1	1	1	3.7	3.7	3.7	42.52	0	20.145	774990	22	14	13.8488	13.7712	14.6809	15.7996	15.8716	15.8305
+	3.86478	1.72825	NbE44071352.1;NbD004675.1;NbD016832.1	NbE44071352.1;NbD004675.1;NbD016832.1	265	Color2 [DarkGray]	1	4					-1	1	1	1	4.5	4.5	4.5	40.345	0	19.58	528950	17	10	14.1271	13.7736	14.102	15.8066	15.6846	15.6963
+	2.45285	1.72694	NbD013345.1;NbE03059674.1	NbD013345.1;NbE03059674.1	754	Color2 [DarkGray]	1	4					-1	1	1	1	2.2	2.2	2.2	61.672	0	55.552	571210	21	11	13.9985	13.8451	14.7521	15.9243	15.9357	15.9165
+	0.656262	1.72648	NbD004296.1;NbD023390.1	NbD004296.1;NbD023390.1	243	Color2 [DarkGray]	1	4					-1	3	3	3	14.8	14.8	14.8	30.623	0	138.11	2253700	18	19	13.9438	13.5651	17.2989	16.5548	16.8618	16.5706
+	3.35224	1.72616	NbD017089.1;NbE03056336.1;NbD007127.1;NbD005240.1;NbD037627.1;NbD033219.1	NbD017089.1;NbE03056336.1;NbD007127.1;NbD005240.1;NbD037627.1;NbD033219.1	947	Color2 [DarkGray]	1	4					-1	8	8	4	34.2	34.2	16.2	28.169	0	84.576	1322600	14	34	14.494	14.0344	14.018	15.9916	15.8353	15.8979
+	2.51031	1.7238	NbD012857.1;NbE05064745.1	NbD012857.1;NbE05064745.1	728	Color2 [DarkGray]	1	4					-1	6	6	3	16.6	16.6	11.1	47.98	0	61.552	1045000	23	21	14.0723	14.9098	14.2245	15.9943	16.2733	16.1104
+	1.4084	1.72042	NbD032620.1	NbD032620.1	1639	Color2 [DarkGray]	1	4					-1	3	3	3	4.1	4.1	4.1	86.137	0	65.566	1488400	40	23	16.196	14.2431	15.0018	16.9166	16.8669	16.8188
+	3.36764	1.71441	NbE05063272.1;NbD016395.1	NbE05063272.1;NbD016395.1	913	Color2 [DarkGray]	1	4					-1	5	2	2	26.7	17.6	17.6	25.028	0	47.586	4121300	14	23	16.3148	16.1971	16.7244	18.1182	18.1238	18.1376
+	2.30188	1.7107	NbE03059573.1;NbD000597.1	NbE03059573.1;NbD000597.1	26	Color2 [DarkGray]	1	4					-1	8	5	5	13	8.9	8.9	97.316	0	80.898	1113200	47	24	14.7992	13.8755	13.9042	15.8308	15.9317	15.9486
+	0.679422	1.71047	NbD048818.1;NbD035713.1;NbD031743.1;NbD014632.1;NbD009629.1;NbD008042.1;NbD017729.1	NbD048818.1;NbD035713.1;NbD031743.1;NbD014632.1;NbD009629.1;NbD008042.1	466	Color2 [DarkGray]	1	4					-1	5	5	5	24.1	24.1	24.1	17.818	0	54.975	2405700	9	21	17.5673	13.9601	14.368	17.125	17.0704	16.8313
+	1.68153	1.70582	NbD030932.1	NbD030932.1	1573	Color2 [DarkGray]	1	4					-1	25	6	0	44.6	14.1	0	70.529	0	74.783	2544600	46	41	13.5561	15.053	14.7829	16.1365	16.194	16.1789
+	2.80724	1.69467	NbD016565.1;NbE03058186.1;NbD051974.1;NbD018483.1;NbD015852.1;NbD006632.1;NbE44069586.1	NbD016565.1;NbE03058186.1;NbD051974.1;NbD018483.1;NbD015852.1;NbD006632.1;NbE44069586.1	923	Color2 [DarkGray]	1	4					-1	5	5	5	33.3	33.3	33.3	24.173	0	92.886	1415900	9	26	13.5266	14.2348	14.1068	15.6174	15.7262	15.6087
+	3.22748	1.64407	NbE03054093.1;NbD003313.1;NbD019693.1	NbE03054093.1;NbD003313.1;NbD019693.1	178	Color2 [DarkGray]	1	4					-1	9	9	9	39.4	39.4	39.4	20.653	0	131.51	3294500	8	64	15.0378	14.8745	15.406	16.7664	16.837	16.6471
+	0.998406	1.6427	NbD013967.1;NbD052931.1	NbD013967.1;NbD052931.1	782	Color2 [DarkGray]	1	4					-1	3	3	3	12.2	12.2	12.2	60.457	0	72.552	1586400	38	26	14.1054	13.3755	15.9672	16.116	16.1574	16.1028
+	1.97921	1.63747	NbD036393.1	NbD036393.1	1788	Color2 [DarkGray]	1	4					-1	5	5	1	9.2	9.2	2.1	75.719	0	57.732	1300100	33	28	14.0613	15.0542	15.2103	16.3761	16.4573	16.4048
+	1.58057	1.63238	NbD037012.1;NbD002769.1	NbD037012.1;NbD002769.1	151	Color2 [DarkGray]	1	4					-1	5	5	2	22.3	22.3	11.2	23.056	0	71.965	2915100	11	34	16.0721	16.0663	14.6505	17.3001	17.1746	17.2113
+	1.36756	1.62335	NbD018995.1;NbE03061979.1;NbE44073332.1;NbE03059960.1	NbD018995.1;NbE03061979.1;NbE44073332.1	1041	Color2 [DarkGray]	1	4					-1	4	4	4	10.1	10.1	10.1	79.534	0	66.739	1549800	39	29	13.5802	14.7748	15.4776	16.2183	16.2005	16.284
+	2.28267	1.60514	NbD046047.1;NbD051495.1;NbE03057442.1	NbD046047.1;NbD051495.1	2144	Color2 [DarkGray]	1	4					-1	8	8	8	27.7	27.7	27.7	53.387	0	117.31	1943200	22	46	14.4331	14.5845	15.3576	16.3075	16.4161	16.467
+	1.35478	1.60362	NbD003433.1;NbD026038.1;NbE05063431.1	NbD003433.1;NbD026038.1;NbE05063431.1	186	Color2 [DarkGray]	1	4					-1	3	3	3	24.4	24.4	24.4	30.28	0	45.231	556220	13	13	14.048	13.1313	15.0386	15.7403	15.5715	15.717
+	1.23754	1.60208	NbD049707.1;NbE05065391.1;NbD030942.1	NbD049707.1;NbE05065391.1;NbD030942.1	1574	Color2 [DarkGray]	1	4					-1	3	3	3	9.7	9.7	9.7	58.566	0	55.693	1570300	23	24	15.0408	15.274	13.3517	16.24	16.0588	16.174
+	2.11979	1.59935	NbD050753.1;NbD046044.1	NbD050753.1;NbD046044.1	2143	Color2 [DarkGray]	1	4					-1	3	1	1	28.5	17.9	17.9	13.725	0	16.291	1569100	7	17	15.3646	15.2697	14.387	16.6828	16.4491	16.6874
+	1.20636	1.58627	NbD011652.1;NbD017942.1;NbE03055451.1	NbD011652.1;NbD017942.1	665	Color2 [DarkGray]	1	4					-1	3	3	2	6	6	3.1	98.121	0	28.382	1608400	55	19	14.803	16.3418	14.2888	16.7458	16.789	16.6576
+	3.80043	1.58282	NbD029079.1	NbD029079.1	1493	Color2 [DarkGray]	1	4					-1	5	5	5	4	4	4	236.38	0	124.23	2108400	119	33	15.7711	15.4225	15.691	17.16	17.2997	17.1735
+	1.37403	1.57577	NbE05064888.1	NbE05064888.1	2489	Color2 [DarkGray]	1	4					-1	3	3	1	11.4	11.4	4.8	31.893	0	31.915	887880	15	17	14.7959	13.5791	15.3924	16.0821	16.177	16.2355
+	3.27397	1.56634	NbD047811.1;NbD050162.1	NbD047811.1;NbD050162.1	2199	Color2 [DarkGray]	1	4					-1	2	2	2	8.3	8.3	8.3	27.248	0	15.481	284020	15	8	13.7578	13.662	13.2693	15.1841	15.0538	15.1503
+	1.58949	1.5542	NbD024559.1	NbD024559.1	1284	Color2 [DarkGray]	1	4					-1	6	6	3	16.7	16.7	8.7	46.509	0	75.008	1605600	16	33	13.7864	13.8732	15.1174	15.5693	16.0052	15.8651
+	2.05066	1.54112	NbD015816.1;NbE44073706.1	NbD015816.1;NbE44073706.1	891	Color2 [DarkGray]	1	4					-1	7	7	3	9	9	3.9	159.6	0	120.94	911430	80	25	13.9595	13.129	14.1929	15.348	15.271	15.2858
+	2.21278	1.52655	NbD014898.1;NbD031467.1;NbD024794.1;NbD000097.1	NbD014898.1;NbD031467.1;NbD024794.1	837	Color2 [DarkGray]	1	4					-1	5	2	1	22.3	11.2	11.2	23.028	0	43.533	538220	11	9	14.7103	14.3883	13.7381	15.8036	15.8734	15.7394
+	2.65514	1.52276	NbD042647.1;NbD024762.1;NbD035112.1;NbD001268.1;NbD034742.1;NbD013148.1	NbD042647.1;NbD024762.1;NbD035112.1;NbD001268.1;NbD034742.1;NbD013148.1	1289	Color2 [DarkGray]	1	4					-1	5	5	5	41.5	41.5	41.5	16.697	0	30.401	626170	9	15	14.6267	13.9806	14.5064	15.8552	16.0665	15.7603
+	2.68119	1.52241	NbD023842.1	NbD023842.1	1253	Color2 [DarkGray]	1	4					-1	17	2	2	47.8	11.7	11.7	35.91	0	25.427	1028100	21	13	14.5398	14.1033	14.821	16.0111	16.0957	15.9245
+	1.46442	1.51853	NbD007258.1;NbE03054419.1	NbD007258.1;NbE03054419.1	422	Color2 [DarkGray]	1	4					-1	5	4	2	14.3	12.1	6	69.292	0	196.89	760270	35	19	14.6449	13.347	13.1007	15.3073	15.182	15.1589
+	1.873	1.50178	NbD018033.1	NbD018033.1	992	Color2 [DarkGray]	1	4					-1	5	5	2	15	15	8.3	57.603	0	55.618	1047600	30	19	13.51	14.113	14.7118	15.4611	15.7005	15.6786
+	2.7312	1.49204	NbD023423.1	NbD023423.1	1237	Color2 [DarkGray]	1	4					-1	2	2	2	14.1	14.1	14.1	34.359	0	24.176	607190	17	15	14.4316	13.8085	13.906	15.5544	15.423	15.6448
+	2.57565	1.4725	NbD040833.1;NbE03056374.1;NbD013711.1	NbD040833.1;NbE03056374.1;NbD013711.1	1952	Color2 [DarkGray]	1	4					-1	5	5	4	12.2	12.2	10	94.115	0	65.32	1134900	40	27	14.3776	14.451	14.9897	16.1916	16.183	15.8612
+	2.8817	1.46781	NbD039302.1;NbD026998.1;NbD005222.1;NbD048664.1;NbE44073973.1;NbD046056.1	NbD039302.1;NbD026998.1	1401	Color2 [DarkGray]	1	4					-1	8	6	6	12.5	9.8	9.8	105.24	0	70.775	922910	46	26	13.8748	14.4996	14.101	15.6036	15.628	15.6472
+	3.23371	1.46441	NbE03060284.1;NbD015387.1	NbE03060284.1;NbD015387.1	862	Color2 [DarkGray]	1	4					-1	8	8	4	10.2	10.2	5.6	167.16	0	112.27	1113100	74	29	13.7041	13.3769	13.8801	15.0947	15.1295	15.1302
+	4.65893	1.44919	NbD039501.1	NbD039501.1	1911	Color2 [DarkGray]	1	4					-1	10	10	0	27.1	27.1	0	66.832	0	256.79	7532100	32	81	17.0991	17.1839	17.2872	18.6082	18.6045	18.705
+	1.48852	1.44896	NbD053060.1;NbD048861.1	NbD053060.1;NbD048861.1	2238	Color2 [DarkGray]	1	4					-1	13	3	0	24.8	6.3	0	49.303	0	43.343	794090	25	15	15.757	14.6118	14.2881	16.2053	16.3596	16.439
+	1.75304	1.44605	NbD051574.1	NbD051574.1	2347	Color2 [DarkGray]	1	4					-1	2	2	2	8.8	8.8	8.8	16.944	0	16.36	937990	6	19	13.5541	14.0788	14.8299	15.5432	15.6501	15.6077
+	2.75858	1.44171	NbD025909.1	NbD025909.1	1355	Color2 [DarkGray]	1	4					-1	4	4	2	9.3	9.3	3.6	60.686	0	40.196	636800	32	18	14.5217	13.9015	14.4341	15.7299	15.7217	15.7308
+	3.96449	1.44061	NbD019226.1	NbD019226.1	1056	Color2 [DarkGray]	1	4					-1	21	21	11	27.5	27.5	15.8	86.032	0	323.31	8615400	48	97	16.1066	16.1129	16.3882	17.6071	17.6558	17.6666
+	2.85197	1.43205	NbD004677.1;NbE03062168.1;NbD016829.1	NbD004677.1;NbE03062168.1;NbD016829.1	266	Color2 [DarkGray]	1	4					-1	8	2	2	27.7	10.1	10.1	44.83	0	54.887	1223600	19	15	14.2607	14.3675	14.6795	16.1229	15.6848	15.7961
+	1.77369	1.42963	NbD050542.1;NbD036339.1	NbD050542.1;NbD036339.1	1782	Color2 [DarkGray]	1	4					-1	6	3	3	21.4	12.6	12.6	52.053	0	55.243	1121600	19	23	14.8842	13.8044	13.7947	15.5729	15.5702	15.6292
+	1.24874	1.42515	NbD032065.1;NbD007410.1	NbD032065.1;NbD007410.1	1610	Color2 [DarkGray]	1	4					-1	6	6	6	29.4	29.4	29.4	36.937	0	55.7	1580300	18	28	15.4469	13.6071	14.3581	15.8912	15.9725	15.8238
+	2.25819	1.4229	NbE03058227.1;NbD011024.1;NbD002695.1	NbE03058227.1;NbD011024.1;NbD002695.1	145	Color2 [DarkGray]	1	4					-1	2	2	2	4.3	4.3	4.3	118.78	0	23.253	559830	56	11	14.6153	13.917	14.7309	15.7371	15.8496	15.9452
+	2.06778	1.42163	NbD033669.1;NbE03056582.1;NbD041174.1	NbD033669.1;NbE03056582.1;NbD041174.1	1691	Color2 [DarkGray]	1	4					-1	2	2	2	7.7	7.7	7.7	64.32	0	53.385	667480	29	14	15.0549	15.0755	14.1817	16.1813	16.1635	16.2321
+	1.3452	1.41214	NbD024519.1;NbE05066552.1;NbE44069253.1;NbE05068112.1;NbD051729.1	NbD024519.1;NbE05066552.1;NbE44069253.1;NbE05068112.1;NbD051729.1	1282	Color2 [DarkGray]	1	4					-1	5	5	5	16.7	16.7	16.7	47.477	0	53.255	558150	24	17	14.0803	13.4021	15.0849	15.6473	15.6451	15.5114
+	1.18655	1.39646	NbD021143.1	NbD021143.1	1138	Color2 [DarkGray]	1	4					-1	6	6	1	34.5	34.5	14.7	31.495	0	89.39	1022700	18	28	14.1947	15.5029	13.6392	15.7975	15.9007	15.8281
+	1.71095	1.39486	NbD041947.1;NbD012457.1	NbD041947.1;NbD012457.1	1987	Color2 [DarkGray]	1	4					-1	4	4	4	9.8	9.8	9.8	73.341	0	102.57	1362100	16	25	15.0473	14.7583	13.8245	15.9528	15.9166	15.9452
+	0.838526	1.38128	NbD010787.1;NbD023946.1	NbD010787.1;NbD023946.1	611	Color2 [DarkGray]	1	4					-1	1	1	1	4.7	4.7	4.7	34.078	0	35.393	1022800	17	12	16.235	16.252	13.9546	16.9537	16.8125	16.8193
+	4.51076	1.36788	NbD052593.1;NbD005493.1;NbD007263.1;NbD006370.1;NbE44070398.1	NbD052593.1;NbD005493.1	324	Color2 [DarkGray]	1	4					-1	27	27	5	56.7	56.7	10.2	46.83	0	323.31	47393000	24	228	19.7071	19.7846	19.5681	21.047	21.0309	21.0855
+	2.89961	1.34695	NbD026907.1	NbD026907.1	1395	Color2 [DarkGray]	1	4					-1	2	2	2	5.6	5.6	5.6	89.547	0	19.406	354870	37	9	14.3921	14.0933	13.8236	15.3985	15.478	15.4734
+	2.64308	1.33584	NbD037970.1	NbD037970.1	1846	Color2 [DarkGray]	1	4					-1	4	4	4	7.5	7.5	7.5	94.161	0	60.399	426400	35	12	14.0416	13.4636	14.0289	15.2206	15.1252	15.1958
+	2.24438	1.32677	NbD049528.1	NbD049528.1	2272	Color2 [DarkGray]	1	4					-1	3	3	3	11	11	11	53.28	0	21.759	675970	25	16	13.691	14.3606	14.4459	15.5499	15.3755	15.5524
+	1.77315	1.32566	NbE44073835.1;NbE03056597.1;NbD038369.1;NbD049026.1;NbD009146.1;NbD023960.1;NbE05064296.1;NbD023705.1	NbE44073835.1;NbE03056597.1;NbD038369.1;NbD049026.1;NbD009146.1;NbD023960.1;NbE05064296.1;NbD023705.1	530	Color2 [DarkGray]	1	4					-1	4	4	1	6	6	1.4	53.133	0	27.109	1024800	22	18	14.5312	15.3832	14.3506	15.9503	16.2926	15.9991
+	0.927361	1.32259	NbE44072821.1;NbD040959.1;NbD002250.1	NbE44072821.1;NbD040959.1	2533	Color2 [DarkGray]	1	4					-1	27	1	1	33.5	1.7	1.7	106.65	0	46.063	1036400	47	12	16.1705	14.0901	14.3074	16.2551	15.9971	16.2836
+	1.05631	1.32214	NbD019343.1	NbD019343.1	1061	Color2 [DarkGray]	1	4					-1	4	4	2	17.7	17.7	5.8	31.982	0	61.68	1254800	17	18	16.48	15.2781	14.461	16.77	16.778	16.6374
+	1.87335	1.30272	NbD042103.1;NbD008222.1	NbD042103.1	1991	Color2 [DarkGray]	1	4					-1	3	3	3	26.8	26.8	26.8	13.319	0	131.68	561320	6	17	13.4059	14.3737	13.9742	15.0211	15.185	15.4559
+	2.08416	1.29554	NbE03057099.1;NbD002939.1	NbE03057099.1;NbD002939.1	156	Color2 [DarkGray]	1	4					-1	11	11	8	20.9	20.9	17	101.03	0	131.01	1705200	49	42	14.8702	13.9728	14.5948	15.7527	15.7559	15.8158
+	2.60778	1.28073	NbD038435.1;NbD010962.1	NbD038435.1;NbD010962.1	618	Color2 [DarkGray]	1	4					-1	2	2	2	14.7	14.7	14.7	10.809	0	16.58	900080	4	15	14.0858	14.5848	14.6837	15.8069	15.7045	15.6851
+	2.72474	1.27313	NbD047411.1;NbD015307.1	NbD047411.1	2191	Color2 [DarkGray]	1	4					-1	8	8	1	35.5	35.5	3.7	25.025	0	244.59	22907000	8	79	18.4608	17.9744	18.4777	19.6712	19.588	19.4733
+	2.33145	1.25677	NbD009302.1;NbE05065425.1	NbD009302.1;NbE05065425.1	536	Color2 [DarkGray]	1	4					-1	4	4	2	6	6	3.8	112.38	0	44.665	542190	62	17	14.0206	13.9117	14.6119	15.3925	15.5051	15.4169
+	1.86581	1.25301	NbD036033.1	NbD036033.1	1774	Color2 [DarkGray]	1	4					-1	16	3	3	17.4	5.3	5.3	136.97	0	46.285	567730	66	17	13.4345	13.487	14.3214	15.1449	14.8745	14.9824
+	3.89228	1.23853	NbE05063775.1;NbD020300.1	NbE05063775.1;NbD020300.1	1094	Color2 [DarkGray]	1	4					-1	1	1	1	3.8	3.8	3.8	54.888	0	73.777	307970	30	8	14.3193	14.1024	14.081	15.4714	15.3415	15.4055
+	1.30995	1.23753	NbD014899.1;NbE05064693.1	NbD014899.1;NbE05064693.1	838	Color2 [DarkGray]	1	4					-1	5	5	2	30	30	6.3	25.721	0	40.9	1483400	7	28	15.2773	14.7983	13.8082	15.6932	16.0138	15.8892
+	1.8645	1.23172	NbD008756.1	NbD008756.1	507	Color2 [DarkGray]	1	4					-1	8	8	3	11.1	11.1	3.6	94.426	0	69.993	1697600	21	41	14.4998	15.4841	15.0071	16.0872	16.3177	16.2811
+	2.03097	1.21863	NbD018307.1;NbE05065193.1	NbD018307.1;NbE05065193.1	1007	Color2 [DarkGray]	1	4					-1	15	4	4	42.4	11.4	11.4	35.92	0	126.15	12161000	17	60	17.6774	17.3455	18.0009	19.1178	19.0187	18.5433
+	3.13531	1.21758	NbE05063289.1;NbD002047.1	NbE05063289.1;NbD002047.1	113	Color2 [DarkGray]	1	4					-1	10	10	4	8.8	8.8	5.1	147.82	0	154.94	3437000	60	66	16.1621	15.8563	16.2957	17.3386	17.3061	17.3221
+	5.29128	1.21312	NbD040723.1;NbD038952.1;NbE03060405.1;NbD023008.1	NbD040723.1;NbD038952.1	1889	Color2 [DarkGray]	1	4					-1	7	7	7	6.8	6.8	6.8	121.79	0	91.522	2955700	50	67	15.4844	15.5767	15.5833	16.7381	16.7478	16.7979
+	1.23803	1.21084	NbD052075.1	NbD052075.1	2365	Color2 [DarkGray]	1	4					-1	6	3	3	40.2	26.9	26.9	27.785	0	27.489	869870	10	19	15.6255	14.5406	14.1237	15.8102	16.164	15.9481
+	1.3795	1.20208	NbD046040.1	NbD046040.1	2142	Color2 [DarkGray]	1	4					-1	2	2	2	4	4	4	69.273	0	22.611	641550	26	14	14.5158	13.3125	13.2835	14.9295	14.9301	14.8584
+	2.06056	1.20033	NbD051733.1;NbD043691.1;NbE05065307.1;NbE05066315.1	NbD051733.1;NbD043691.1	2047	Color2 [DarkGray]	1	4					-1	3	3	3	11.2	11.2	11.2	45.875	0	32.641	754880	25	18	13.8784	14.726	14.3766	15.4635	15.4984	15.6202
+	2.61307	1.18733	NbD017355.1	NbD017355.1	961	Color2 [DarkGray]	1	4					-1	22	22	6	49.9	49.9	13.1	58.558	0	323.31	26352000	32	172	18.7261	18.7266	18.2172	19.8162	19.6758	19.7399
+	1.6869	1.17663	NbD041230.1	NbD041230.1	1963	Color2 [DarkGray]	1	4					-1	3	3	1	8.7	8.7	8.7	25.151	0	107.16	1165300	10	27	14.312	15.3821	14.9821	15.9626	16.1329	16.1106
+	3.37602	1.15148	NbD008344.1;NbE44070642.1;NbD016121.1	NbD008344.1;NbE44070642.1;NbD016121.1	478	Color2 [DarkGray]	1	4					-1	7	7	7	87.2	87.2	87.2	12.174	0	147.26	1878400	7	40	15.4559	15.1093	15.2197	16.4709	16.4043	16.3642
+	1.81025	1.14547	NbD015306.1;NbD015305.1;NbD014350.1;NbD013348.1	NbD015306.1;NbD015305.1;NbD014350.1;NbD013348.1	755	Color2 [DarkGray]	1	4					-1	24	5	0	54.2	13.1	0	46.93	0	188.57	14362000	23	42	19.095	19.3857	18.4596	20.2228	20.1696	19.9843
+	1.27456	1.1357	NbD013513.1;NbE03055932.1;NbD053068.1;NbD000974.1	NbD013513.1;NbE03055932.1;NbD053068.1	761	Color2 [DarkGray]	1	4					-1	8	8	8	12.2	12.2	12.2	97.918	0	138.87	11895000	46	66	18.3848	18.4511	17.1743	19.1455	19.0498	19.2219
+	2.67501	1.12793	NbD037434.1;NbE05064271.1	NbD037434.1;NbE05064271.1	1826	Color2 [DarkGray]	1	4					-1	11	3	3	14	3.9	3.9	133.6	0	26.44	344190	64	10	13.6975	13.7989	14.2179	15.0228	15.0516	15.0237
+	3.9974	1.12337	NbD024919.1;NbD046098.1	NbD024919.1;NbD046098.1	1298	Color2 [DarkGray]	1	4					-1	2	2	2	10.1	10.1	10.1	38.117	0	33.388	554540	19	15	14.0327	14.0474	14.0818	15.311	15.1515	15.0695
+	2.98123	1.11066	NbD036688.1;NbD015746.1	NbD036688.1;NbD015746.1	883	Color2 [DarkGray]	1	4					-1	3	3	2	9.1	9.1	5.6	50.666	0	55.189	397260	20	12	14.0766	13.7508	14.1212	14.9925	15.0937	15.1943
+	2.13999	1.10121	NbD034166.1;NbD002181.1	NbD034166.1;NbD002181.1	1705	Color2 [DarkGray]	1	4					-1	3	3	3	13.6	13.6	13.6	38.727	0	75.598	1164000	14	27	14.6964	14.6679	14.0536	15.4536	15.6413	15.6267
+	2.27073	1.09234	NbD048785.1	NbD048785.1	2231	Color2 [DarkGray]	1	4					-1	5	5	5	9.6	9.6	9.6	82.849	0	41.183	383290	46	19	14.2317	13.9628	14.6447	15.3904	15.3853	15.3405
+	2.85343	1.08662	NbD034983.1;NbD005190.1;NbD000793.1;NbD051419.1;NbD023244.1;NbD022731.1	NbD034983.1;NbD005190.1;NbD000793.1;NbD051419.1;NbD023244.1;NbD022731.1	41	Color2 [DarkGray]	1	4					-1	6	3	3	17.6	17	17	17.4	0	268.52	4677900	11	38	16.2305	15.9834	16.2746	17.4527	17.1104	17.1851
+	2.18664	1.08296	NbD020669.1;NbE05064017.1;NbD051958.1	NbD020669.1;NbE05064017.1;NbD051958.1	1114	Color2 [DarkGray]	1	4					-1	10	10	10	10.9	10.9	10.9	147.85	0	105.1	1538800	93	43	15.2949	15.1765	14.6197	16.1085	16.1194	16.112
+	2.49479	1.07458	NbE03053434.1;NbD016041.1;NbE05064043.1;NbD049742.1;NbD038446.1	NbE03053434.1;NbD016041.1;NbE05064043.1;NbD049742.1	896	Color2 [DarkGray]	1	4					-1	4	4	3	5.5	5.5	4.3	104.45	0	77.163	1119200	32	22	14.2098	14.6567	14.7417	15.538	15.6793	15.6147
+	2.81878	1.06748	NbD022309.1;NbE03061767.1;NbD018068.1;NbE44071766.1	NbD022309.1;NbE03061767.1;NbD018068.1;NbE44071766.1	1192	Color2 [DarkGray]	1	4					-1	6	6	5	17.4	17.4	17.4	55.368	0	55.795	634910	28	21	14.008	14.3762	14.4428	15.2965	15.3971	15.3358
+	1.77179	1.06317	NbD037085.1	NbD037085.1	1818	Color2 [DarkGray]	1	4					-1	2	2	2	6.2	6.2	6.2	63.433	0	16.455	558270	32	16	14.5107	13.5949	14.1598	15.0811	15.2159	15.1579
+	3.43728	1.05204	NbD019897.1;NbE05065809.1;NbD007938.1	NbD019897.1;NbE05065809.1;NbD007938.1	458	Color2 [DarkGray]	1	4					-1	6	6	6	10.9	10.9	10.9	87.207	0	69.32	1826400	39	38	15.0028	15.1487	15.2624	16.163	16.108	16.299
+	4.18513	1.0497	NbD036935.1	NbD036935.1	1812	Color2 [DarkGray]	1	4					-1	3	3	2	19.4	19.4	13.5	28.639	0	34.825	4881500	17	25	17.7898	17.7883	17.8292	18.9701	18.7866	18.7996
+	1.91366	1.04275	NbD036664.1	NbD036664.1	1797	Color2 [DarkGray]	1	4					-1	2	2	2	6.2	6.2	6.2	33.684	0	19.232	459080	20	17	13.4808	14.1052	14.2062	14.8201	15.0232	15.0772
+	1.46758	1.03201	NbD022167.1;NbD015073.1	NbD022167.1;NbD015073.1	845	Color2 [DarkGray]	1	4					-1	2	2	2	6.1	6.1	6.1	42.925	0	41.161	358110	17	11	13.2119	13.6568	14.2986	14.5939	14.8736	14.7958
+	2.26766	1.03139	NbD051185.1	NbD051185.1	2338	Color2 [DarkGray]	1	4					-1	13	11	6	20.7	17.8	11.1	84.235	0	112.51	2722800	49	50	15.4154	15.6266	15.3549	16.3198	16.8354	16.3359
+	1.96936	1.03006	NbE44074514.1;NbD037856.1;NbD003354.1	NbE44074514.1;NbD037856.1;NbD003354.1	183	Color2 [DarkGray]	1	4					-1	1	1	1	5.9	5.9	5.9	29.357	0	45.615	431240	13	14	13.8746	13.5476	14.327	14.889	14.9476	15.0027
+	2.40206	1.02494	NbE44069792.1;NbE44069791.1;NbD023878.1;NbD016350.1	NbE44069792.1;NbE44069791.1;NbD023878.1;NbD016350.1	1255	Color2 [DarkGray]	1	4					-1	4	4	4	13.1	13.1	13.1	70.855	0	38.902	473910	25	16	13.9745	13.4817	13.9911	14.762	14.8706	14.8895
+	3.00759	1.02113	NbE05065387.1;NbD031547.1	NbE05065387.1;NbD031547.1	1595	Color2 [DarkGray]	1	4					-1	11	11	3	9.9	9.9	2.7	123.06	0	236.58	4776200	60	62	16.1932	15.8384	16.156	17.0126	17.1208	17.1176
+	2.43704	1.0176	NbD034833.1;NbE44071419.1	NbD034833.1;NbE44071419.1	1735	Color2 [DarkGray]	1	4					-1	4	4	3	17.8	17.8	14.7	43.521	0	75.626	401770	21	12	14.1513	13.586	13.8123	14.8242	14.8552	14.923
+	2.89022	1.00842	NbE03056006.1;NbD007021.1	NbE03056006.1;NbD007021.1	406	Color2 [DarkGray]	1	4					-1	6	6	4	4	4	2.7	264.64	0	64.006	790200	103	20	14.2134	14.0683	14.4848	15.2485	15.2259	15.3174
+	3.12658	0.975954	NbD046450.1	NbD046450.1	2160	Color2 [DarkGray]	1	4					-1	3	3	3	28.8	28.8	28.8	17.814	0	22.619	360410	12	12	14.0734	14.4115	14.3563	15.2593	15.2399	15.2699
+	2.9401	0.957465	NbD034251.1	NbD034251.1	1713	Color2 [DarkGray]	1	4					-1	8	8	3	21.5	21.5	10.2	66.2	0	107.59	6392100	30	47	17.1368	17.364	17.4864	18.2624	18.2094	18.3878
+	3.46614	0.957224	NbE44072281.1;NbD025860.1;NbE03054741.1;NbD044147.1;NbE44070708.1	NbE44072281.1;NbD025860.1;NbE03054741.1;NbD044147.1;NbE44070708.1	1354	Color2 [DarkGray]	1	4					-1	3	3	3	21.3	21.3	21.3	30.706	0	39.105	665990	14	14	14.2844	14.4757	14.2659	15.2659	15.3993	15.2324
+	3.64733	0.941093	NbE44069004.1;NbD025668.1	NbE44069004.1;NbD025668.1	1341	Color2 [DarkGray]	1	4					-1	17	17	8	23.1	23.1	9.1	94.906	0	323.31	6219800	53	80	16.3096	16.4029	16.5495	17.413	17.3417	17.3306
+	2.81192	0.937566	NbD045570.1	NbD045570.1	2121	Color2 [DarkGray]	1	4					-1	3	3	1	9	9	2.6	61.116	0	21.546	296790	26	11	14.253	13.8715	13.9707	15.0344	14.8888	14.9847
+	4.43375	0.928797	NbD047628.1;NbE44071807.1	NbD047628.1;NbE44071807.1	2196	Color2 [DarkGray]	1	4					-1	4	4	2	15.2	15.2	8.7	35.424	0	86.711	1026600	16	24	15.224	15.1675	15.2177	16.0519	16.145	16.1986
+	3.58207	0.928233	NbD022380.1	NbD022380.1	1195	Color2 [DarkGray]	1	4					-1	15	4	4	21.4	8.4	8.4	83.749	0	116.38	3194000	47	37	16.4914	16.288	16.2804	17.3413	17.2304	17.2728
+	3.50135	0.924227	NbD051101.1	NbD051101.1	2332	Color2 [DarkGray]	1	4					-1	5	5	2	9.6	9.6	5.2	88.844	0	83.507	2519700	38	45	16.432	16.4055	16.1888	17.2275	17.2756	17.296
+	2.3696	0.920258	NbD035474.1;NbD001029.1;NbD033517.1;NbD027909.1	NbD035474.1;NbD001029.1;NbD033517.1;NbD027909.1	52	Color2 [DarkGray]	1	4					-1	2	2	2	7.4	7.4	7.4	24.622	0	18.842	531370	10	10	14.169	14.0471	14.5169	15.2912	15.1551	15.0475
+	2.52574	0.903272	NbD041325.1	NbD041325.1	1966	Color2 [DarkGray]	1	4					-1	6	6	5	18.1	18.1	14.4	61.417	0	93.431	1193000	26	29	15.6503	15.2485	15.6764	16.471	16.4049	16.4092
+	3.09913	0.856953	NbD011838.1;NbD005795.1	NbD011838.1;NbD005795.1	343	Color2 [DarkGray]	1	4					-1	3	3	3	7.9	7.9	7.9	60.064	0	44.626	623530	26	15	14.2123	14.2095	14.4624	15.1564	15.0767	15.222
+	4.14443	0.838117	NbE03057694.1;NbD002127.1;NbD002128.1;NbD050332.1	NbE03057694.1;NbD002127.1;NbD002128.1	117	Color2 [DarkGray]	1	4					-1	18	18	3	20.3	20.3	5	137.07	0	293.16	16869000	67	110	19.0675	19.1143	18.9698	19.938	19.8743	19.8537
+	4.17419	-0.829929	NbD050929.1	NbD050929.1	2324	Color2 [DarkGray]	1	4					-1	9	9	1	39.3	39.3	7.3	29.416	0	86.831	2377900	13	63	16.3508	16.2874	16.3869	15.4417	15.5745	15.5191
+	3.76142	-0.834662	NbD007849.1	NbD007849.1	452	Color2 [DarkGray]	1	4					-1	4	4	4	10.4	10.4	10.4	62.329	0	66.528	1453900	32	21	16.7235	16.7396	16.5754	15.8934	15.7822	15.859
+	2.66138	-0.888316	NbE03058635.1;NbD031028.1;NbD020434.1;NbE44071750.1;NbD021662.1;NbD016205.1;NbD011063.1;NbD011064.1	NbE03058635.1;NbD031028.1;NbD020434.1;NbE44071750.1	1099	Color2 [DarkGray]	1	4					-1	41	41	13	54.6	54.6	24.5	66.619	0	323.31	89489000	35	401	20.5178	20.8403	20.4307	19.6801	19.6896	19.7541
+	2.67451	-0.909363	NbD036388.1	NbD036388.1	1786	Color2 [DarkGray]	1	4					-1	4	4	4	16.4	16.4	16.4	45.293	0	51.235	1602200	19	26	16.7916	17.1016	17.1574	16.1732	16.1618	15.9875
+	3.87366	-0.932309	NbD048991.1	NbD048991.1	2248	Color2 [DarkGray]	1	4					-1	8	8	8	22	22	22	42.296	0	93.822	3471100	21	50	17.7603	17.9439	17.8213	16.8801	16.98	16.8685
+	2.21576	-0.964101	NbD005404.1;NbE03058841.1;NbD009906.1	NbD005404.1;NbE03058841.1	317	Color2 [DarkGray]	1	4					-1	3	3	3	21.1	21.1	21.1	20.037	0	71.046	885620	12	30	15.9391	15.6076	16.168	15.0207	15.0236	14.7782
+	2.54888	-0.989543	NbD044268.1;NbE44072467.1;NbD006582.1	NbD044268.1;NbE44072467.1;NbD006582.1	2075	Color2 [DarkGray]	1	4					-1	2	2	2	21.5	21.5	21.5	19.284	0	44.029	2488200	12	27	17.4564	17.0672	17.3027	16.4049	16.3665	16.0862
+	2.06348	-1.04163	NbE05066551.1;NbD005386.1	NbE05066551.1;NbD005386.1	314	Color2 [DarkGray]	1	4					-1	1	1	1	0.9	0.9	0.9	149.43	0.0013787	7.3472	295330	73	9	15.2357	15.3404	15.1265	14.0064	14.6078	13.9635
+	3.65836	-1.06182	NbE05066401.1;NbD005115.1	NbE05066401.1;NbD005115.1	290	Color2 [DarkGray]	1	4					-1	8	8	2	14.9	14.9	2.8	47.147	0	219.75	9492300	12	40	19.7336	19.6915	19.4672	18.5468	18.5783	18.5818
+	1.83376	-1.07171	NbD049007.1;NbE44072129.1;NbD012257.1	NbD049007.1;NbE44072129.1;NbD012257.1	2250	Color2 [DarkGray]	1	4					-1	2	2	2	14.4	14.4	14.4	22.811	0	50.305	607990	11	14	15.25	15.0762	15.2006	13.8411	13.8563	14.6142
+	4.60933	-1.08492	NbD003943.1;NbD030459.1;NbE44071578.1	NbD003943.1;NbD030459.1;NbE44071578.1	222	Color2 [DarkGray]	1	4					-1	44	44	4	49.9	49.9	12.6	80.268	0	323.31	183230000	34	602	20.8632	20.8673	20.7255	19.711	19.7279	19.7623
+	1.14173	-1.15074	NbE05068286.1;NbD028484.1;NbD010146.1;NbD051875.1;NbE03059962.1;NbD038894.1	NbE05068286.1;NbD028484.1;NbD010146.1;NbD051875.1	582	Color2 [DarkGray]	1	4					-1	3	3	3	31.1	31.1	31.1	17.469	0	34.274	436410	7	13	15.1044	14.7157	15.1721	12.9569	14.4316	14.1515
+	3.2538	-1.16731	NbE44072412.1;NbD028722.1;NbE03060801.1;NbD038080.1;NbD007011.1	NbE44072412.1;NbD028722.1;NbE03060801.1;NbD038080.1	1481	Color2 [DarkGray]	1	4					-1	7	7	2	11.1	11.1	4.5	87.605	0	77.053	2572200	39	45	17.4364	17.4226	17.2136	16.0087	16.3011	16.2609
+	3.22343	-1.19709	NbD030896.1	NbD030896.1	1570	Color2 [DarkGray]	1	4					-1	40	11	4	45.6	16.5	2.6	80.18	0	243.74	11691000	34	109	19.4274	19.6254	19.2877	18.2179	18.1439	18.3875
+	3.56545	-1.23952	NbD045966.1	NbD045966.1	2139	Color2 [DarkGray]	1	4					-1	10	10	3	21.1	21.1	5.3	51.712	0	156.17	14855000	24	90	19.4531	19.7586	19.6401	18.3894	18.4608	18.2829
+	4.19	-1.24018	NbD033096.1	NbD033096.1	1663	Color2 [DarkGray]	1	4					-1	37	8	3	46	8.2	2.6	70.894	0	166.12	8385000	37	54	19.0509	19.223	18.9893	17.8464	17.8733	17.8229
+	2.0216	-1.29591	NbE05066068.1;NbD015466.1	NbE05066068.1;NbD015466.1	2501	Color2 [DarkGray]	1	4					-1	8	8	3	40.1	40.1	15.6	43.697	0	81.528	1274800	22	32	16.4944	16.1642	16.4218	15.3923	15.2468	14.5536
+	1.03968	-1.36158	NbD012820.1;NbE03054988.1	NbD012820.1;NbE03054988.1	726	Color2 [DarkGray]	1	4					-1	5	5	0	45.4	45.4	0	20.37	0	33.972	1316800	11	17	16.3868	16.1077	16.2352	13.8747	15.9811	14.7891
+	1.60715	-1.37937	NbD034434.1;NbD034433.1;NbD013009.1;NbD013008.1	NbD034434.1;NbD034433.1;NbD013009.1;NbD013008.1	739	Color2 [DarkGray]	1	4					-1	2	2	2	13.6	13.6	13.6	36.318	0	42.206	352230	18	12	15.5181	15.4124	15.3638	13.4134	14.7608	13.9819
+	3.37787	-1.38598	NbD033329.1;NbE03059003.1;NbD014909.1;NbE03055025.1	NbD033329.1;NbE03059003.1;NbD014909.1;NbE03055025.1	1671	Color2 [DarkGray]	1	4					-1	3	3	3	18.9	18.9	18.9	44.723	0	31.451	700000	14	15	16.3363	16.5712	16.282	15.1948	14.8974	14.9395
+	3.17881	-1.38712	NbE03061400.1;NbD027327.1;NbD031193.1	NbE03061400.1;NbD027327.1;NbD031193.1	2469	Color2 [DarkGray]	1	4					-1	4	4	3	29.9	29.9	25.5	21.05	0	138.12	9707200	8	32	20.0242	20.123	19.6795	18.659	18.4798	18.5265
+	1.7334	-1.41034	NbD022120.1	NbD022120.1	1182	Color2 [DarkGray]	1	4					-1	1	1	1	4.9	4.9	4.9	25.224	0	15.97	757570	10	14	15.7239	15.7786	15.6552	14.2914	13.6845	14.9507
+	3.88846	-1.4348	NbE44074027.1;NbE03060606.1	NbE44074027.1;NbE03060606.1	2541	Color2 [DarkGray]	1	4					-1	16	16	4	33.6	33.6	12.2	91.696	0	321.62	24081000	39	115	21.2177	21.2659	21.0525	19.8359	19.5967	19.799
+	1.13613	-1.43814	NbD027434.1	NbD027434.1	1416	Color2 [DarkGray]	1	4					-1	13	1	1	44	9.2	9.2	37.631	0	22.882	602400	19	15	15.8329	16.0928	16.0309	14.2822	15.676	13.684
+	3.03378	-1.45437	NbD015262.1;NbD015261.1;NbE03059928.1;NbE44074020.1	NbD015262.1;NbD015261.1	852	Color2 [DarkGray]	1	4					-1	10	10	0	62.4	62.4	0	20.27	0	231.3	4055200	10	46	18.5827	18.4835	18.3938	16.7838	16.9925	17.3207
+	1.65695	-1.46552	NbD020037.1	NbD020037.1	1090	Color2 [DarkGray]	1	4					-1	3	3	3	27	27	27	10.889	0	74.37	708840	7	15	15.8311	15.9156	16.5888	14.743	14.0432	15.1528
+	1.02108	-1.46749	NbD052940.1;NbD016942.1	NbD052940.1;NbD016942.1	2393	Color2 [DarkGray]	1	4					-1	3	3	3	42.7	42.7	42.7	10.078	0	36.377	1683500	6	26	17.0133	17.12	16.5897	14.1328	16.0239	16.1639
+	2.93409	-1.51653	NbD048218.1	NbD048218.1	2215	Color2 [DarkGray]	1	4					-1	2	2	1	8.1	8.1	3.2	55.737	0	27.879	507520	35	10	15.6046	15.7453	15.7784	14.3735	14.3629	13.8422
+	3.04264	-1.54687	NbE05066728.1;NbD038147.1	NbE05066728.1;NbD038147.1	1855	Color2 [DarkGray]	1	4					-1	4	4	2	17.6	17.6	9.4	35.368	0	32.964	684790	14	20	15.4868	15.2104	15.2054	14.0326	13.5262	13.7031
+	2.2565	-1.57542	NbE03059857.1;NbD044251.1;NbD030619.1	NbE03059857.1;NbD044251.1;NbD030619.1	1562	Color2 [DarkGray]	1	4					-1	7	7	7	16.6	16.6	16.6	86.043	0	84.055	1073600	41	28	15.7917	15.5783	15.7595	14.6426	14.0914	13.6692
+	1.1435	-1.57659	NbD028706.1	NbD028706.1	1480	Color2 [DarkGray]	1	4					-1	4	4	3	9.4	9.4	8	61.907	0	39.612	1110000	31	22	15.8132	15.7019	15.9947	13.5508	15.5432	13.6861
+	0.779044	-1.57681	NbD012148.1;NbD020527.1	NbD012148.1;NbD020527.1	689	Color2 [DarkGray]	1	4					-1	4	4	4	15.7	15.7	15.7	30.365	0	36.492	1582700	15	23	17.3812	17.3489	17.2057	13.8754	16.568	16.762
+	0.768066	-1.59615	NbD003607.1;NbE03061286.1;NbD004351.1;NbD042181.1	NbD003607.1;NbE03061286.1;NbD004351.1	201	Color2 [DarkGray]	1	4					-1	4	4	3	32.2	32.2	23.7	13.369	0	26.957	1788000	8	18	18.2349	18.2639	17.5674	14.5816	17.1484	17.5477
+	0.677084	-1.60917	NbD012332.1	NbD012332.1	700	Color2 [DarkGray]	1	4					-1	5	5	1	30.6	30.6	8.5	29.238	0	39.95	1988500	13	23	17.6721	17.7056	17.6646	13.914	17.2185	17.0823
+	2.05887	-1.63971	NbE05066005.1;NbD046673.1;NbD048589.1	NbE05066005.1;NbD046673.1;NbD048589.1	2168	Color2 [DarkGray]	1	4					-1	8	8	8	32.1	32.1	32.1	44.827	0	60.857	656000	24	19	16.1449	16.1558	15.4714	14.7954	13.9793	14.0782
+	1.05058	-1.6452	NbD039430.1;NbD002971.1	NbD039430.1;NbD002971.1	158	Color2 [DarkGray]	1	4					-1	5	5	4	30	30	23.8	32.428	0	38.101	1321500	13	19	17.105	17.31	16.6187	13.9532	16.0459	16.0991
+	0.794276	-1.80444	NbE03058465.1;NbD052042.1;NbD025608.1	NbE03058465.1;NbD052042.1;NbD025608.1	1339	Color2 [DarkGray]	1	4					-1	4	4	4	30.7	30.7	30.7	17.665	0	126.38	1774800	10	23	17.3157	17.3554	17.3843	16.8391	13.4697	16.3333
+	2.06748	-1.80454	NbD034351.1;NbD034350.1	NbD034351.1;NbD034350.1	1716	Color2 [DarkGray]	1	4					-1	6	6	2	46.2	46.2	13.8	16.264	0	35.276	767880	8	16	16.0893	16.1115	16.2487	14.1399	13.8296	15.0665
+	2.6855	-1.90249	NbD020769.1	NbD020769.1	1116	Color2 [DarkGray]	1	4					-1	4	4	2	19.6	19.6	9.7	44.882	0	77.155	680930	23	15	16.2876	16.4078	16.0531	14.0051	14.8251	14.2108
+	1.13413	-1.90906	NbE44074169.1;NbD038978.1;NbD025005.1;NbE03059725.1	NbE44074169.1;NbD038978.1;NbD025005.1	1305	Color2 [DarkGray]	1	4					-1	8	8	8	28.6	28.6	28.6	42.693	0	154.55	2484100	26	29	17.6776	18.1519	17.6045	16.9877	16.3124	14.4066
+	3.66652	-1.91136	NbE05062862.1;NbE44070342.1	NbE05062862.1;NbE44070342.1	2480	Color2 [DarkGray]	1	4					-1	5	5	5	23.5	23.5	23.5	29.561	0	48.339	871730	16	23	16.0377	16.0147	16.1372	14.4326	14.0719	13.951
+	1.9593	-2.0309	NbD049573.1;NbE03060798.1;NbD003994.1	NbD049573.1;NbE03060798.1	2275	Color2 [DarkGray]	1	4					-1	3	3	3	20.1	20.1	20.1	24.855	0	41.648	627270	13	15	16.6877	16.2229	16.6345	15.2949	13.8368	14.3207
+	3.29911	-2.03419	NbD014174.1	NbD014174.1	796	Color2 [DarkGray]	1	4					-1	2	2	2	6.3	6.3	6.3	32.295	0	16.381	401310	17	10	16.1957	16.1931	16.2152	14.0055	13.9359	14.56
+	2.27749	-2.04179	NbD029921.1	NbD029921.1	1537	Color2 [DarkGray]	1	4					-1	3	3	3	8.4	8.4	8.4	58.224	0	22.762	955710	29	16	15.4746	15.4984	15.717	12.8027	13.8042	13.9577
+	6.59859	-2.06164	PafA|BAIT|BAIT_LABEL	PafA|BAIT|BAIT_LABEL	2546	Color2 [DarkGray]	1	4					-1	69	69	69	97.5	97.5	97.5	53.8	0	323.31	3913500000	26	4592	24.5589	24.568	24.648	22.514	22.5332	22.5428
+	0.891087	-2.10117	NbD051097.1;NbE03061143.1;NbD035229.1	NbD051097.1;NbE03061143.1	2331	Color2 [DarkGray]	1	4					-1	3	3	3	13.5	13.5	13.5	35.68	0	44.869	2033100	13	17	17.6624	17.9297	17.9613	14.7929	14.5225	17.9345
+	2.74437	-2.17786	NbD001421.1;NbD045383.1;NbE03057707.1;NbE03060203.1;NbE03054497.1;NbE03060607.1;NbE05064295.1	NbD001421.1;NbD045383.1;NbE03057707.1;NbE03060203.1	77	Color2 [DarkGray]	1	4					-1	15	3	3	26.5	5.7	5.7	94.381	0	29.066	456850	40	8	16.5613	16.8026	16.5665	14.0754	14.3023	15.0191
+	3.31447	-2.196	NbD033120.1	NbD033120.1	1664	Color2 [DarkGray]	1	4					-1	25	3	3	69.1	4.3	4.3	47.836	0	19.232	752420	23	12	16.2261	16.5493	16.4089	14.2335	13.8545	14.5083
+	1.15782	-2.30431	NbD000183.1;NbD009419.1;NbE05065992.1;NbD041320.1;NbE03060989.1;NbD053073.1;NbD049334.1;NbD026872.1;NbD017283.1;NbD017092.1;NbD013027.1;NbD009418.1;NbD005470.1;NbD000403.1	NbD000183.1;NbD009419.1;NbE05065992.1;NbD041320.1;NbE03060989.1;NbD053073.1;NbD049334.1;NbD026872.1;NbD017283.1;NbD017092.1;NbD013027.1;NbD009418.1;NbD005470.1;NbD000403.1	16	Color2 [DarkGray]	1	4					-1	3	3	2	10.4	10.4	10.4	17.38	0	40.041	2090000	7	17	17.5266	17.5863	17.6357	13.9718	14.7726	17.0912
+	2.22019	-2.44815	NbD046535.1	NbD046535.1	2163	Color2 [DarkGray]	1	4					-1	40	4	4	45.6	2.6	2.6	80.164	0	47.065	2712600	34	43	17.7047	17.7888	17.4114	15.5734	14.2971	15.69
+	1.791	-2.4769	NbE03054927.1;NbD050829.1	NbE03054927.1;NbD050829.1	2321	Color2 [DarkGray]	1	4					-1	4	4	4	13.5	13.5	13.5	54.743	0	27.527	928130	29	22	15.8603	15.9771	17.0786	12.908	14.5441	14.0332
+	1.73224	-2.56093	NbE03054496.1;NbE44072942.1	NbE03054496.1;NbE44072942.1	2413	Color2 [DarkGray]	1	4					-1	15	5	5	28.1	12.9	12.9	84.93	0	48.457	1724300	36	20	17.654	17.6646	17.7059	16.4369	14.6066	14.2983
+	1.87982	-2.93659	NbD029169.1	NbD029169.1	1500	Color2 [DarkGray]	1	4					-1	15	7	5	24.3	11.2	6.4	93.674	0	92.227	1680700	42	24	17.6473	17.5897	17.0506	14.1379	15.7797	13.5603
+	2.37781	-3.37746	NbE03062147.1;NbD034667.1;NbD029750.1	NbE03062147.1;NbD034667.1;NbD029750.1	2476	Color2 [DarkGray]	1	4					-1	4	4	4	23.8	23.8	23.8	13.402	0	54.133	2140100	7	27	18.0067	17.9996	17.1266	13.7168	13.9713	15.3124
+	4.77348	-3.91624	NbD046389.1;NbD002741.1	NbD046389.1;NbD002741.1	150	Color2 [DarkGray]	1	4					-1	4	4	4	15.6	15.6	15.6	32.916	0	113.45	3307800	18	20	17.5275	17.5865	17.6222	13.574	13.4434	13.9701
+	4.9075	-4.59685	NbD053112.1;NbD051206.1	NbD053112.1;NbD051206.1	2339	Color2 [DarkGray]	1	4					-1	2	2	2	6.5	6.5	6.5	18.057	0	20.3	1468600	8	8	18.4305	18.4999	18.689	13.9779	13.6559	14.195
+	3.1802	-4.94538	NbD034730.1	NbD034730.1	1730	Color2 [DarkGray]	1	4					-1	3	3	3	17.2	17.2	17.2	11.235	0	28.444	2440000	5	13	18.8916	18.4358	18.3987	13.1969	13.0839	14.6091

## Sheet: NtRACK1 and GFP LFQ
Log2 transformed LFQ of proteins detected in samples from NbRACK1-PafA or GFP-PafA
GFP_rep1	GFP_rep2	GFP_rep3	NtRACK_rep1	NtRACK_rep2	NtRACK_rep3	C: Only identified by site	C: Reverse	C: Potential contaminant	C: Taxonomy IDs	N: Peptides	N: Razor + unique peptides	N: Unique peptides	N: Sequence coverage [%]	N: Unique + razor sequence coverage [%]	N: Unique sequence coverage [%]	N: Mol. weight [kDa]	N: Q-value	N: Score	N: Intensity	N: iBAQ peptides	N: MS/MS count	T: Protein IDs	T: Majority protein IDs	T: id
NaN	NaN	NaN	19.3833	15.5626	13.3429				-1	26	26	26	52.9	52.9	52.9	35.747	0	323.31	212450000	20	497	atRACK	atRACK	0
24.7321	25.062	25.0169	24.1017	24.2636	24.2741				-1	5	5	5	27.8	27.8	27.8	7.8251	0	186.7	582860000	1	241	FLAGPUP|SUB|SUB_LABEL	FLAGPUP|SUB|SUB_LABEL	8
NaN	NaN	NaN	17.8978	18.0503	18.1589				-1	3	3	3	9.1	9.1	9.1	52.685	0	65.401	4103200	20	19	NbE05064168.1;NbD000166.1;NbE05064169.1	NbE05064168.1;NbD000166.1	14
17.5266	17.5863	17.6357	NaN	NaN	NaN				-1	3	3	2	10.4	10.4	10.4	17.38	0	40.041	2090000	7	17	NbD000183.1;NbD009419.1;NbE05065992.1;NbD041320.1;NbE03060989.1;NbD053073.1;NbD049334.1;NbD026872.1;NbD017283.1;NbD017092.1;NbD013027.1;NbD009418.1;NbD005470.1;NbD000403.1	NbD000183.1;NbD009419.1;NbE05065992.1;NbD041320.1;NbE03060989.1;NbD053073.1;NbD049334.1;NbD026872.1;NbD017283.1;NbD017092.1;NbD013027.1;NbD009418.1;NbD005470.1;NbD000403.1	16
NaN	NaN	NaN	15.1879	15.4772	15.3293				-1	8	5	5	13	8.9	8.9	97.316	0	80.898	1113200	47	24	NbE03059573.1;NbD000597.1	NbE03059573.1;NbD000597.1	26
21.277	21.2508	20.9692	20.5333	20.6105	20.7107				-1	39	39	2	49.1	49.1	2.9	83.327	0	323.31	71076000	39	288	NbD000717.1	NbD000717.1	32
NaN	NaN	15.1452	15.4358	NaN	15.4804				-1	3	3	3	6.2	6.2	6.2	48.718	0	26.26	396890	23	12	NbD000762.1;NbE44073946.1;NbE03056140.1;NbD005845.1	NbD000762.1	35
NaN	NaN	NaN	15.4986	15.5499	15.5429				-1	3	3	1	5.2	5.2	1.7	91.555	0	21.671	347410	52	10	NbD000771.1;NbD023745.1	NbD000771.1;NbD023745.1	39
16.2305	15.9834	16.2746	17.6503	17.625	17.5979				-1	6	3	3	17.6	17	17	17.4	0	268.52	4677900	11	38	NbD034983.1;NbD005190.1;NbD000793.1;NbD051419.1;NbD023244.1;NbD022731.1	NbD034983.1;NbD005190.1;NbD000793.1;NbD051419.1;NbD023244.1;NbD022731.1	41
17.4564	17.2014	17.6181	17.3543	17.406	17.2633				-1	4	4	4	17.4	17.4	17.4	29.908	0	110.17	4399000	9	41	NbD004804.1;NbD000808.1	NbD004804.1;NbD000808.1	42
18.2994	18.335	18.329	18.0668	18.1412	18.1937				-1	14	14	3	34.9	34.9	8.6	51.251	0	255.81	8322900	27	91	NbD000821.1	NbD000821.1	43
18.1853	18.1589	18.1112	17.2584	17.2738	17.355				-1	24	24	24	34.3	34.3	34.3	91.866	0	323.31	15060000	47	157	NbD000885.1	NbD000885.1	47
16.4736	16.1854	16.774	15.7858	15.7669	15.8313				-1	1	1	1	9.4	9.4	9.4	20.849	0	26.868	1708200	11	23	NbE03062109.1;NbD037613.1;NbD000955.1	NbE03062109.1;NbD037613.1;NbD000955.1	49
NaN	NaN	14.6249	17.1717	17.1545	17.1669				-1	10	10	4	42.8	42.8	19.6	21.975	0	132.67	4053800	10	59	NbD022454.1;NbD000971.1;NbD001902.1;NbD009944.1	NbD022454.1;NbD000971.1;NbD001902.1	50
NaN	NaN	NaN	16.6993	16.9234	16.7847				-1	3	3	3	25.2	25.2	25.2	11.77	0	59.625	2256100	6	29	NbD028652.1;NbD022971.1;NbD001068.1;NbE03061671.1	NbD028652.1;NbD022971.1;NbD001068.1;NbE03061671.1	56
17.3625	17.2725	17.5767	17.5678	17.4341	17.3816				-1	4	4	4	26.9	26.9	26.9	22.276	0	57.341	3638000	14	35	NbD001253.1;NbD050116.1	NbD001253.1;NbD050116.1	65
NaN	NaN	NaN	16.6251	16.7485	16.6409				-1	1	1	1	6.3	6.3	6.3	30.096	0	28.437	1028200	12	12	NbD001333.1;NbD007942.1;NbE03060837.1;NbE03062469.1	NbD001333.1;NbD007942.1;NbE03060837.1;NbE03062469.1	71
NaN	NaN	NaN	16.4114	16.3422	16.2531				-1	3	3	1	5.9	5.9	3	102.14	0	25.867	1064900	45	17	NbD001415.1;NbE05065485.1;NbD015542.1	NbD001415.1;NbE05065485.1	76
16.5613	16.8026	16.5665	NaN	NaN	NaN				-1	15	3	3	26.5	5.7	5.7	94.381	0	29.066	456850	40	8	NbD001421.1;NbD045383.1;NbE03057707.1;NbE03060203.1;NbE03054497.1;NbE03060607.1;NbE05064295.1	NbD001421.1;NbD045383.1;NbE03057707.1;NbE03060203.1	77
16.4662	NaN	NaN	NaN	16.5053	16.7399				-1	2	2	2	6.2	6.2	6.2	26.928	0	14.606	1388800	13	15	NbE03061005.1;NbD001486.1;NbD014314.1	NbE03061005.1;NbD001486.1;NbD014314.1	81
17.0886	16.9532	16.8656	17.3893	17.407	17.4585				-1	6	6	3	16.5	16.5	9.1	49.779	0	70.873	2839900	20	35	NbD001607.1;NbD049317.1;NbD052009.1;NbE44073149.1	NbD001607.1;NbD049317.1	89
15.6907	15.7529	15.6888	NaN	NaN	NaN				-1	3	3	3	11.8	11.8	11.8	49.905	0	41.849	689170	21	20	NbE03056145.1;NbD015832.1;NbD001618.1	NbE03056145.1;NbD015832.1;NbD001618.1	90
17.4602	17.6586	17.437	17.684	17.9361	17.7428				-1	12	12	10	25.8	25.8	25.8	68.399	0	214.98	6474000	22	85	NbD001635.1;NbD049141.1;NbE44071034.1;NbD050521.1;NbD033830.1;NbE05063305.1;NbE05068629.1;NbD033831.1;NbE03059885.1;NbE03059355.1;NbD033834.1;NbD002878.1;NbD002877.1	NbD001635.1;NbD049141.1;NbE44071034.1	91
16.277	16.2897	16.1135	NaN	NaN	NaN				-1	5	5	3	14.3	14.3	6.5	46.688	0	56.452	790690	19	19	NbD001659.1;NbE05067714.1	NbD001659.1;NbE05067714.1	93
17.8221	17.811	17.8214	17.3133	17.5499	17.6854				-1	6	6	2	18.9	18.9	10	31.336	0	154.11	7100300	12	60	NbD001815.1;NbE05067944.1	NbD001815.1;NbE05067944.1	102
19.3974	19.2463	19.3951	19.0793	19.1209	19.167				-1	20	20	2	39.1	39.1	3	55.465	0	323.31	38573000	21	196	NbD001885.1;NbD021566.1	NbD001885.1	104
15.7397	16.1003	15.3464	15.6647	15.6353	15.7868				-1	7	7	1	23.5	23.5	5.5	46.608	0	182.72	1731500	19	44	NbD001938.1	NbD001938.1	108
20.6179	20.4761	20.5662	19.8274	19.8087	19.9186				-1	28	28	28	62.3	62.3	62.3	24.204	0	323.31	34313000	12	165	NbD035639.1;NbD001974.1	NbD035639.1;NbD001974.1	112
16.1621	15.8563	16.2957	16.4482	16.5095	16.6041				-1	10	10	4	8.8	8.8	5.1	147.82	0	154.94	3437000	60	66	NbE05063289.1;NbD002047.1	NbE05063289.1;NbD002047.1	113
15.1924	NaN	NaN	13.9147	14.0892	NaN				-1	4	4	4	27.7	27.7	27.7	26.287	0	73.514	618030	16	20	NbE05066099.1;NbD002068.1	NbE05066099.1;NbD002068.1	114
17.5758	17.984	17.8683	17.8164	17.8429	17.8331				-1	5	5	5	21.9	21.9	21.9	33.507	0	68.28	4478000	19	42	NbE05062792.1;NbD002107.1	NbE05062792.1;NbD002107.1	116
19.0675	19.1143	18.9698	19.6497	19.6442	19.5607				-1	18	18	3	20.3	20.3	5	137.07	0	293.16	16869000	67	110	NbE03057694.1;NbD002127.1;NbD002128.1;NbD050332.1	NbE03057694.1;NbD002127.1;NbD002128.1	117
14.9767	14.9653	NaN	15.5628	15.8114	NaN				-1	3	3	1	3.3	3.3	1.4	122.46	0	21.099	647130	50	15	NbD002142.1	NbD002142.1	118
NaN	NaN	NaN	20.2305	20.1791	20.1192				-1	4	4	2	35	35	23.1	15.906	0	75.179	11514000	9	28	NbD002190.1;NbD013740.1;NbE03056937.1	NbD002190.1;NbD013740.1;NbE03056937.1	121
19.5027	19.4697	19.6106	20.1767	20.3225	20.1887				-1	10	10	4	50	50	27.9	18.103	0	104.41	33840000	10	138	NbD002217.1;NbD000150.1	NbD002217.1	122
14.6015	14.0081	14.9083	19.8109	19.6717	19.6046				-1	34	34	11	78.1	78.1	32	44.847	0	323.31	34992000	23	172	NbD002220.1	NbD002220.1	123
16.6168	16.2278	16.8504	17.2918	17.1544	17.1489				-1	3	3	3	31.4	31.4	31.4	15.326	0	49.511	2093200	9	22	NbD041143.1;NbD002230.1	NbD041143.1;NbD002230.1	124
18.6203	18.3215	18.4424	17.9945	17.9392	17.9421				-1	7	7	4	43.3	43.3	30.3	29.172	0	117.26	5029300	17	40	NbD002277.1;NbD033476.1	NbD002277.1;NbD033476.1	126
NaN	NaN	NaN	17.3929	17.4441	16.9427				-1	1	1	1	8.5	8.5	8.5	22.151	0.0015322	8.9901	1424400	12	11	NbD002297.1;NbE03053482.1	NbD002297.1;NbE03053482.1	128
15.8285	15.7416	16.274	18.0215	17.8682	17.8238				-1	3	3	3	36.7	36.7	36.7	16.075	0	45.684	1970700	6	21	NbE03061602.1;NbD034105.1;NbD002350.1;NbD034452.1	NbE03061602.1;NbD034105.1;NbD002350.1	131
15.8502	15.9277	14.8693	13.8079	NaN	NaN				-1	4	4	4	40.9	40.9	40.9	19.63	0	74.679	673090	10	21	NbD050701.1;NbD015031.1;NbD051894.1;NbD045377.1;NbD028500.1;NbD009974.1;NbD003304.1;NbD022085.1;NbD002419.1;NbE03053680.1;NbE05068052.1;NbD010029.1;NbD002638.1	NbD050701.1;NbD015031.1;NbD051894.1;NbD045377.1;NbD028500.1;NbD009974.1;NbD003304.1;NbD022085.1;NbD002419.1;NbE03053680.1;NbE05068052.1;NbD010029.1;NbD002638.1	133
14.2146	14.6953	14.7852	15.9542	16.0396	16.1554				-1	7	7	7	11.6	11.6	11.6	100.32	0	75.486	1795000	50	36	NbD002583.1;NbE05068690.1;NbD005526.1	NbD002583.1;NbE05068690.1;NbD005526.1	136
NaN	15.926	16.2677	16.0492	15.969	16.0309				-1	3	3	1	9.7	9.7	2.6	80.116	0	27.536	963710	38	20	NbE05067600.1;NbD002601.1	NbE05067600.1;NbD002601.1	137
20.6835	20.645	20.6685	21.0463	21.116	21.1791				-1	33	33	25	77.7	77.7	58.9	35.848	0	323.31	86456000	19	323	NbD002609.1	NbD002609.1	138
15.8003	15.9309	16.0693	16.333	16.19	16.3624				-1	1	1	1	0.7	0.7	0.7	175.78	0	23.609	1154800	77	18	NbD002653.1;NbE05066214.1;NbD014090.1	NbD002653.1;NbE05066214.1;NbD014090.1	143
16.3022	15.7451	15.8508	15.7443	15.4702	15.4589				-1	4	4	4	18.7	18.7	18.7	36.71	0	58.844	1067800	11	25	NbD011032.1;NbD002699.1	NbD011032.1;NbD002699.1	146
17.5275	17.5865	17.6222	NaN	NaN	NaN				-1	4	4	4	15.6	15.6	15.6	32.916	0	113.45	3307800	18	20	NbD046389.1;NbD002741.1	NbD046389.1;NbD002741.1	150
16.0721	16.0663	NaN	17.2822	17.3515	17.3491				-1	5	5	2	22.3	22.3	11.2	23.056	0	71.965	2915100	11	34	NbD037012.1;NbD002769.1	NbD037012.1;NbD002769.1	151
NaN	NaN	NaN	17.2783	17.2027	17.2598				-1	5	5	1	19.7	19.7	3.8	29.888	0	159.26	2401300	16	29	NbD002901.1	NbD002901.1	154
NaN	NaN	NaN	15.9016	15.8216	15.8322				-1	11	11	8	20.9	20.9	17	101.03	0	131.01	1705200	49	42	NbE03057099.1;NbD002939.1	NbE03057099.1;NbD002939.1	156
15.4192	15.3519	15.7524	19.1235	18.6349	18.9965				-1	14	14	3	44.2	44.2	15.8	44.696	0	240.15	10444000	19	83	NbD002963.1;NbD015297.1	NbD002963.1;NbD015297.1	157
17.105	17.31	16.6187	NaN	NaN	NaN				-1	5	5	4	30	30	23.8	32.428	0	38.101	1321500	13	19	NbD039430.1;NbD002971.1	NbD039430.1;NbD002971.1	158
NaN	NaN	NaN	16.8507	16.9781	16.9417				-1	7	5	5	32.7	22.6	22.6	38.596	0	56.367	2122100	21	22	NbD002999.1	NbD002999.1	161
16.2847	16.2381	16.4387	16.597	16.536	16.6423				-1	11	11	11	18.4	18.4	18.4	73.377	0	157.95	3296800	33	52	NbD003208.1	NbD003208.1	171
16.2368	16.0565	16.0787	17.2155	17.0376	17.1516				-1	11	11	5	8.1	8.1	4.8	144.95	0	128.58	4175300	56	77	NbE44071147.1;NbE03054693.1;NbD003232.1	NbE44071147.1;NbE03054693.1;NbD003232.1	172
18.1093	17.9599	17.6351	18.1246	17.98	18.0155				-1	13	13	12	47.7	47.7	42.8	34.224	0	117.62	5575000	15	58	NbD003274.1;NbD038065.1;NbE05064614.1	NbD003274.1;NbD038065.1;NbE05064614.1	174
15.0378	14.8745	15.406	17.1853	17.1203	16.8942				-1	9	9	9	39.4	39.4	39.4	20.653	0	131.51	3294500	8	64	NbE03054093.1;NbD003313.1;NbD019693.1	NbE03054093.1;NbD003313.1;NbD019693.1	178
20.3042	20.455	20.4932	20.5651	20.6587	20.5545				-1	13	13	5	50.4	50.4	28	25.774	0	323.31	40460000	11	106	NbE03056876.1;NbD003315.1;NbD026108.1	NbE03056876.1;NbD003315.1	179
16.604	16.7004	16.103	16.6374	17.1089	16.8179				-1	4	4	4	21.1	21.1	21.1	31.126	0	60.773	2296800	15	26	NbD037868.1;NbD003344.1;NbD015367.1;NbD017703.1;NbE03053946.1;NbE05062860.1	NbD037868.1;NbD003344.1;NbD015367.1;NbD017703.1;NbE03053946.1;NbE05062860.1	182
13.8746	NaN	NaN	NaN	14.5338	14.5335				-1	1	1	1	5.9	5.9	5.9	29.357	0	45.615	431240	13	14	NbE44074514.1;NbD037856.1;NbD003354.1	NbE44074514.1;NbD037856.1;NbD003354.1	183
NaN	NaN	NaN	17.1935	17.3435	17.7968				-1	6	6	2	24.1	24.1	14.5	28.291	0	87.61	2503400	9	23	NbD003525.1;NbD013869.1;NbD004501.1;NbD010443.1	NbD003525.1;NbD013869.1;NbD004501.1;NbD010443.1	192
NaN	NaN	NaN	16.4474	16.9273	16.5305				-1	6	6	6	33.1	33.1	33.1	20.013	0	61.407	1962700	8	22	NbD013144.1;NbD003598.1;NbD049416.1;NbD046368.1	NbD013144.1;NbD003598.1;NbD049416.1;NbD046368.1	197
17.1528	17.0016	17.3841	17.1164	16.8392	17.1069				-1	8	8	2	29.6	29.6	8.3	35.769	0	68.785	3231600	19	38	NbD003600.1	NbD003600.1	198
16.3473	16.2372	16.273	16.2271	16.3669	16.4726				-1	7	7	7	19.4	19.4	19.4	47.501	0	92.324	2630800	25	46	NbD003605.1;NbD025203.1;NbD028572.1	NbD003605.1;NbD025203.1;NbD028572.1	200
18.2349	18.2639	17.5674	NaN	NaN	NaN				-1	4	4	3	32.2	32.2	23.7	13.369	0	26.957	1788000	8	18	NbD003607.1;NbE03061286.1;NbD004351.1;NbD042181.1	NbD003607.1;NbE03061286.1;NbD004351.1	201
NaN	NaN	NaN	16.5632	16.3473	16.2124				-1	1	1	1	11.2	11.2	11.2	14.061	0.0010712	10.325	840620	6	12	NbD033301.1;NbD003611.1	NbD033301.1;NbD003611.1	202
17.776	17.6205	17.8621	NaN	NaN	NaN				-1	2	2	2	7.7	7.7	7.7	20.053	0	71.599	2321800	8	15	NbD003620.1;NbD012723.1	NbD003620.1;NbD012723.1	203
NaN	15.5687	15.5165	16.3707	16.3458	16.3858				-1	2	2	2	7	7	7	35.58	0	13.226	1187400	18	23	NbD003622.1;NbE03061483.1;NbD012720.1	NbD003622.1;NbE03061483.1;NbD012720.1	204
19.3318	19.2132	19.3427	19.6198	19.6156	19.6316				-1	14	14	4	30.4	30.4	15.7	52.566	0	195.67	25077000	27	112	NbD003658.1	NbD003658.1	205
16.6227	16.4441	16.4042	NaN	NaN	NaN				-1	4	4	4	9	9	9	67.831	0	77.856	1711100	18	17	NbD006212.1;NbE05064822.1;NbD003821.1	NbD006212.1;NbE05064822.1;NbD003821.1	212
16.7499	16.9204	17.1659	17.7015	17.5346	17.5745				-1	8	8	5	69.1	69.1	48.2	12.319	0	323.31	5797700	5	63	NbE03060197.1;NbD031121.1;NbD003914.1	NbE03060197.1;NbD031121.1;NbD003914.1	220
16.5781	16.4346	16.3597	NaN	15.8439	15.6286				-1	5	5	5	20.1	20.1	20.1	46.163	0	129.05	1114600	25	22	NbD003922.1;NbE44074037.1;NbD003233.1;NbD026186.1;NbD021688.1;NbE05068076.1	NbD003922.1;NbE44074037.1;NbD003233.1;NbD026186.1;NbD021688.1;NbE05068076.1	221
20.8632	20.8673	20.7255	19.3645	19.4738	19.5679				-1	44	44	4	49.9	49.9	12.6	80.268	0	323.31	183230000	34	602	NbD003943.1;NbD030459.1;NbE44071578.1	NbD003943.1;NbD030459.1;NbE44071578.1	222
15.8777	15.8483	15.3913	15.8778	NaN	16.018				-1	5	5	5	18.7	18.7	18.7	39.449	0	35.179	881460	18	26	NbD003945.1;NbD030458.1;NbD029274.1	NbD003945.1;NbD030458.1	223
NaN	15.9593	NaN	16.5305	16.46	16.4983				-1	10	3	3	11	1.6	1.6	135.17	0	52.086	1430900	67	21	NbD004040.1	NbD004040.1	229
NaN	NaN	NaN	15.0634	15.094	15.0104				-1	2	2	2	17.2	17.2	17.2	22.517	0	23.146	520880	15	16	NbD035446.1;NbD004085.1	NbD035446.1;NbD004085.1	231
NaN	NaN	16.0574	16.1974	16.2988	16.2545				-1	2	2	2	4.8	4.8	4.8	52.011	0	73.655	1004000	21	20	NbE05068715.1;NbD047330.1;NbD004157.1	NbE05068715.1;NbD047330.1;NbD004157.1	236
NaN	NaN	17.2989	17.356	17.235	17.2388				-1	3	3	3	14.8	14.8	14.8	30.623	0	138.11	2253700	18	19	NbD004296.1;NbD023390.1	NbD004296.1;NbD023390.1	243
NaN	NaN	NaN	16.323	16.6063	16.2982				-1	3	3	0	5.5	5.5	0	97.361	0	55.296	1083800	44	22	NbE05068122.1;NbD045394.1;NbD004375.1;NbD010161.1;NbD035088.1;NbE44073814.1	NbE05068122.1;NbD045394.1;NbD004375.1	246
19.4008	19.8631	19.5744	18.6136	18.6762	18.6742				-1	26	26	7	59.3	59.3	11.1	42.813	0	323.31	27506000	23	171	NbD004396.1	NbD004396.1	248
19.5853	19.8538	19.3928	17.9479	18.2307	18.413				-1	15	15	7	59.2	59.2	37.2	34.758	0	271.91	24117000	14	137	NbD004403.1	NbD004403.1	250
17.1095	17.2326	17.1439	16.3768	16.5683	16.7197				-1	13	13	7	48.2	48.2	28.4	39.556	0	312.8	4367300	19	73	NbD004407.1	NbD004407.1	252
17.765	17.8603	17.0811	16.4851	16.5233	16.9878				-1	3	3	1	23.4	23.4	5.2	31.336	0	39.782	1988300	19	22	NbD004513.1	NbD004513.1	255
NaN	NaN	NaN	15.133	15.0957	14.6868				-1	4	4	3	11.8	11.8	8.6	70.876	0	33.737	275280	23	12	NbD004530.1;NbD017403.1	NbD004530.1;NbD017403.1	256
NaN	NaN	NaN	19.3165	19.4261	18.8584				-1	7	7	7	89.2	89.2	89.2	7.4666	0	63.337	10858000	3	45	NbD051686.1;NbD029155.1;NbD012968.1;NbD006401.1;NbD004560.1;NbD000411.1	NbD051686.1;NbD029155.1;NbD012968.1;NbD006401.1;NbD004560.1;NbD000411.1	257
NaN	NaN	NaN	14.9655	14.8473	14.7439				-1	3	3	3	8.7	8.7	8.7	77.692	0	38.16	391700	38	13	NbD040735.1;NbE05064849.1;NbD004589.1	NbD040735.1;NbE05064849.1;NbD004589.1	259
15.8622	15.2589	15.8387	16.9741	17.1166	16.9207				-1	11	11	2	16.7	16.7	4	105.02	0	112.61	2568800	48	56	NbD005345.1;NbD004594.1;NbE05063837.1;NbE05068705.1;NbD049696.1;NbD014616.1;NbD051114.1	NbD005345.1;NbD004594.1;NbE05063837.1	260
NaN	NaN	NaN	16.8085	17.0966	17.0254				-1	8	2	2	27.7	10.1	10.1	44.83	0	54.887	1223600	19	15	NbD004677.1;NbE03062168.1;NbD016829.1	NbD004677.1;NbE03062168.1;NbD016829.1	266
15.8498	15.9856	16.011	15.7308	15.9242	15.7026				-1	5	5	5	15.9	15.9	15.9	42.948	0	44.893	1031100	25	23	NbD004760.1;NbD008451.1	NbD004760.1	268
15.6636	15.8839	NaN	15.5576	15.5813	15.5826				-1	4	4	3	21.3	21.3	13.3	34.356	0	31.483	972510	17	21	NbD004880.1;NbE03057179.1;NbD052064.1	NbD004880.1;NbE03057179.1;NbD052064.1	276
15.4166	NaN	NaN	15.5838	15.5687	15.5244				-1	1	1	1	8.1	8.1	8.1	20.005	0	27.713	651120	7	16	NbD028896.1;NbD004889.1	NbD028896.1;NbD004889.1	277
NaN	NaN	NaN	17.4712	17.5363	17.4575				-1	8	8	8	13.7	13.7	13.7	57.401	0	269.71	4810000	20	56	NbD004937.1	NbD004937.1	280
17.7599	17.486	17.2824	16.9234	16.8054	16.8221				-1	8	8	8	20	20	20	33.469	0	130.41	4684700	17	58	NbE03057196.1;NbD024654.1;NbD004954.1	NbE03057196.1;NbD024654.1;NbD004954.1	282
15.6317	15.6529	NaN	15.4288	15.4343	15.426				-1	6	6	6	15.1	15.1	15.1	69.499	0	46.195	1078700	38	29	NbD005010.1;NbE03061041.1;NbE44074502.1;NbD014748.1;NbD023504.1;NbE05068659.1	NbD005010.1;NbE03061041.1;NbE44074502.1;NbD014748.1;NbD023504.1;NbE05068659.1	284
NaN	NaN	NaN	16.4143	16.0326	15.8659				-1	4	4	4	20.9	20.9	20.9	51.759	0	84.136	552920	17	12	NbD005048.1;NbD001933.1	NbD005048.1	286
19.7336	19.6915	19.4672	17.9617	18.1034	18.1273				-1	8	8	2	14.9	14.9	2.8	47.147	0	219.75	9492300	12	40	NbE05066401.1;NbD005115.1	NbE05066401.1;NbD005115.1	290
15.9579	16.0653	15.9419	16.2792	16.3879	16.6928				-1	11	11	11	20.3	20.3	20.3	98.615	0	222.86	3222700	44	69	NbD005127.1;NbE44073258.1;NbE03055766.1;NbD005127.2;NbD010743.1	NbD005127.1;NbE44073258.1;NbE03055766.1;NbD005127.2;NbD010743.1	292
15.1583	NaN	NaN	14.6589	15.1841	14.9361				-1	3	2	2	12.1	9	9	42.745	0	14.62	561890	22	17	NbD005165.1;NbD042982.1	NbD005165.1;NbD042982.1	298
16.7978	16.7569	16.5922	17.2708	17.2592	17.4331				-1	14	14	14	38.5	38.5	38.5	33.115	0	151.05	5550700	15	74	NbD005184.1;NbD013187.1	NbD005184.1;NbD013187.1	299
NaN	16.451	16.5865	17.0793	16.8384	16.8914				-1	2	2	2	6.1	6.1	6.1	26.416	0	14.229	1708200	9	19	NbD038510.1;NbD005340.1	NbD038510.1;NbD005340.1	308
17.115	NaN	17.2685	16.5617	16.5064	16.4718				-1	3	3	3	12.7	12.7	12.7	33.419	0	44.916	2168600	18	27	NbD005361.1;NbE03059628.1	NbD005361.1;NbE03059628.1	311
NaN	NaN	NaN	16.7568	16.6716	16.5561				-1	3	3	3	32.4	32.4	32.4	12.097	0	22.176	900140	4	10	NbD048690.1;NbD005381.1;NbD052432.1;NbD025616.1;NbE03054751.1;NbE03061170.1;NbD024878.1;NbD015058.1;NbD005581.1	NbD048690.1;NbD005381.1;NbD052432.1;NbD025616.1;NbE03054751.1;NbE03061170.1;NbD024878.1;NbD015058.1;NbD005581.1	313
15.2357	15.3404	15.1265	NaN	NaN	NaN				-1	1	1	1	0.9	0.9	0.9	149.43	0.0013787	7.3472	295330	73	9	NbE05066551.1;NbD005386.1	NbE05066551.1;NbD005386.1	314
NaN	14.5105	NaN	15.2356	15.2185	15.1436				-1	3	3	3	4	4	4	56.185	0	22.786	540680	23	16	NbD042083.1;NbD005389.1;NbD024876.1	NbD042083.1;NbD005389.1;NbD024876.1	315
15.9391	15.6076	16.168	15.3572	15.6572	15.507				-1	3	3	3	21.1	21.1	21.1	20.037	0	71.046	885620	12	30	NbD005404.1;NbE03058841.1;NbD009906.1	NbD005404.1;NbE03058841.1	317
NaN	NaN	NaN	20.3489	20.3206	20.1459				-1	11	11	4	30.2	30.2	14	48.449	0	318.05	20465000	16	65	NbD005408.1	NbD005408.1	318
18.7678	18.6827	18.8302	18.6617	18.6145	18.0961				-1	18	18	4	34	34	9.3	79.79	0	323.31	16673000	34	129	NbD005444.1	NbD005444.1	319
16.7815	17.0077	16.8358	16.1721	16.2451	16.3497				-1	6	6	4	38.4	38.4	26.3	25.237	0	57.24	3014500	8	32	NbD005456.1;NbD003040.1	NbD005456.1;NbD003040.1	322
19.7071	19.7846	19.5681	20.237	20.3563	20.4367				-1	27	27	5	56.7	56.7	10.2	46.83	0	323.31	47393000	24	228	NbD052593.1;NbD005493.1;NbD007263.1;NbD006370.1;NbE44070398.1	NbD052593.1;NbD005493.1	324
NaN	NaN	NaN	16.3746	16.0433	16.3322				-1	1	1	1	4	4	4	51.789	0.0015038	8.5117	604110	24	12	NbD005507.1;NbE03060838.1;NbD018821.1	NbD005507.1;NbE03060838.1;NbD018821.1	325
17.3971	17.3455	17.492	16.5751	16.643	16.5737				-1	6	6	6	20.5	20.5	20.5	33.302	0	112.21	2595400	16	38	NbD008802.1;NbD005522.1	NbD008802.1;NbD005522.1	327
19.2743	19.1988	19.2578	19.2991	19.1523	19.2628				-1	20	20	7	78.3	78.3	43.7	36.061	0	323.31	37511000	14	165	NbD005550.1	NbD005550.1	328
14.8837	14.8935	14.7287	NaN	14.9921	15.0577				-1	2	2	1	10.2	10.2	6.4	39.407	0	27.228	756580	19	24	NbD005565.1	NbD005565.1	329
16.5042	16.2073	16.1924	16.1944	16.2111	16.2991				-1	9	9	9	56.5	56.5	56.5	25.225	0	155.5	2969900	12	55	NbD005637.1	NbD005637.1	331
19.1186	19.0771	19.1317	19.0056	19.2671	19.1265				-1	13	13	13	71.4	71.4	71.4	22.289	0	323.31	22256000	17	117	NbE05067575.1;NbD005638.1;NbE44069874.1;NbE44069873.1	NbE05067575.1;NbD005638.1;NbE44069874.1;NbE44069873.1	332
17.43	17.2805	17.4504	17.5614	17.5269	17.5737				-1	12	12	3	33.1	33.1	12.8	59.431	0	272.59	5584400	29	91	NbD005649.1	NbD005649.1	333
16.4976	16.4335	15.6194	15.9653	16.4707	16.2292				-1	6	6	6	17	17	17	35.39	0	52.261	3492100	14	51	NbD005697.1;NbD032078.1	NbD005697.1;NbD032078.1	334
NaN	NaN	NaN	17.3559	17.1825	17.0529				-1	8	8	1	23.1	23.1	3.3	44.41	0	96.92	2806200	24	41	NbD005717.1	NbD005717.1	335
NaN	NaN	NaN	17.9222	17.769	17.7109				-1	11	11	5	35	35	28.2	32.31	0	159.07	5123800	21	55	NbD005751.1	NbD005751.1	338
15.6826	15.8032	15.211	NaN	NaN	NaN				-1	2	2	2	9.5	9.5	9.5	24.563	0	18.436	403610	11	10	NbD028865.1;NbD005771.1	NbD028865.1;NbD005771.1	341
15.6153	15.4023	15.3448	NaN	NaN	NaN				-1	6	6	6	19.8	19.8	19.8	47.312	0	48.17	739530	23	23	NbE05067406.1;NbD028863.1;NbD005773.1;NbE44070422.1;NbD048162.1;NbD024886.1	NbE05067406.1;NbD028863.1;NbD005773.1;NbE44070422.1	342
16.5724	16.6422	16.3398	16.5353	16.5743	16.5694				-1	7	7	7	33	33	33	22.98	0	94.457	1747900	12	31	NbD005834.1;NbE44072125.1	NbD005834.1;NbE44072125.1	345
16.6859	16.5713	16.5046	NaN	15.4969	15.9155				-1	4	4	2	32.4	32.4	11.8	15.327	0	60.892	1439800	6	31	NbD005848.1;NbE44070594.1	NbD005848.1;NbE44070594.1	346
17.5863	17.8618	17.2197	17.4101	17.3727	17.4666				-1	16	16	15	47.5	47.5	46.5	35.54	0	208.07	6101600	19	87	NbD005868.1;NbD049165.1;NbE05067102.1;NbD039956.1;NbD027399.1;NbE03055729.1;NbD001085.1	NbD005868.1	348
NaN	NaN	NaN	16.5176	16.7062	16.5711				-1	11	1	0	50	10.9	0	17.759	0	27.278	993950	7	14	NbD046070.1;NbD013798.1;NbD010028.1;NbD005951.1;NbD041065.1	NbD046070.1;NbD013798.1;NbD010028.1;NbD005951.1;NbD041065.1	351
17.9612	18.0148	17.6635	17.3253	17.6533	17.4785				-1	3	3	2	19.1	19.1	19.1	24.77	0	61.968	3515100	11	28	NbD006024.1;NbE05068218.1;NbE03054247.1	NbD006024.1;NbE05068218.1	353
NaN	NaN	NaN	16.4685	16.3976	16.0824				-1	2	2	2	7.8	7.8	7.8	17.746	0	21.382	774410	8	15	NbD010894.1;NbD006133.1	NbD010894.1;NbD006133.1	358
18.2989	18.4654	17.8189	NaN	17.641	17.835				-1	16	4	3	28.3	5.1	4.3	56.384	0	61.638	4362400	25	27	NbD025147.1;NbE05064292.1;NbD006149.1	NbD025147.1;NbE05064292.1;NbD006149.1	360
14.7191	14.3703	14.3557	18.4035	18.2793	18.3214				-1	23	23	18	21.8	21.8	18.4	111.58	0	323.31	10413000	53	110	NbE03057974.1;NbD006156.1	NbE03057974.1;NbD006156.1	361
15.7243	NaN	NaN	15.9181	15.3053	15.7974				-1	5	5	2	6.3	6.3	2	138.03	0	42.968	704900	59	19	NbD006165.1;NbE03057382.1	NbD006165.1;NbE03057382.1	363
14.5528	14.5479	14.7692	15.2529	15.3215	15.366				-1	4	4	4	7	7	7	106.76	0	66.117	719540	40	24	NbE05063684.1;NbD006276.1;NbD036602.1;NbE05064569.1	NbE05063684.1;NbD006276.1;NbD036602.1;NbE05064569.1	364
NaN	NaN	NaN	17.3637	17.3371	16.9574				-1	4	4	4	17.9	17.9	17.9	25.154	0	37.903	1539200	17	20	NbD031529.1;NbE05068423.1;NbD006299.1;NbE03057916.1;NbD020517.1	NbD031529.1;NbE05068423.1;NbD006299.1;NbE03057916.1;NbD020517.1	365
16.1045	16.3951	16.0724	14.7273	14.9217	15.1099				-1	3	3	3	10.3	10.3	10.3	47.773	0	32.886	1092800	28	22	NbD050710.1;NbD010379.1;NbD007227.1;NbD006392.1;NbD034685.1;NbE44072390.1	NbD050710.1;NbD010379.1;NbD007227.1;NbD006392.1	371
18.1931	18.1763	17.836	16.797	17.0001	17.017				-1	8	2	2	21.6	4.3	4.3	45.016	0	152.4	3028300	19	22	NbD040873.1;NbD006492.1;NbD038588.1;NbD042030.1;NbE44072140.1;NbD041021.1;NbD043235.1;NbD018839.1	NbD040873.1;NbD006492.1	379
17.5997	16.9815	17.4632	18.2072	18.2258	18.3087				-1	5	5	5	6.1	6.1	6.1	95.509	0	51.802	4695500	42	44	NbE03057609.1;NbE03060088.1;NbD027331.1;NbD006530.1	NbE03057609.1;NbE03060088.1;NbD027331.1;NbD006530.1	381
17.1166	17.1987	16.9254	16.3577	16.7315	16.7443				-1	6	6	6	30.2	30.2	30.2	37.076	0	106.04	4610600	22	43	NbE05063613.1;NbD006612.1	NbE05063613.1;NbD006612.1	387
17.0389	17.2148	16.9706	17.4554	17.3322	17.6928				-1	8	8	8	16.6	16.6	16.6	75.147	0	130.56	4933900	31	64	NbD006717.1	NbD006717.1	392
18.1827	18.295	17.8481	17.502	17.6085	17.2918				-1	4	4	3	45.6	45.6	34.9	16.833	0	205.13	6230600	9	40	NbD052653.1;NbD052504.1;NbD050959.1;NbD008144.1;NbD006753.1;NbD033588.1;NbD039934.1;NbD022239.1;NbD038786.1	NbD052653.1;NbD052504.1;NbD050959.1;NbD008144.1;NbD006753.1;NbD033588.1;NbD039934.1;NbD022239.1;NbD038786.1	393
14.9575	14.9752	14.4975	NaN	NaN	NaN				-1	2	2	2	10	10	10	43.922	0	20.006	250190	20	14	NbD038781.1;NbD006757.1	NbD038781.1;NbD006757.1	394
NaN	NaN	NaN	16.1896	16.0537	16.339				-1	2	2	2	3.2	3.2	3.2	74.952	0	15.13	935360	32	15	NbE03053793.1;NbD050511.1;NbD006793.1	NbE03053793.1;NbD050511.1;NbD006793.1	395
15.494	15.491	15.6203	15.3961	14.9984	15.2598				-1	2	2	2	13	13	13	28.883	0	41.296	903890	16	23	NbE44071081.1;NbE44069864.1;NbD006940.1;NbE03055949.1;NbD019801.1	NbE44071081.1;NbE44069864.1;NbD006940.1;NbE03055949.1;NbD019801.1	402
NaN	NaN	NaN	15.304	15.314	15.5259				-1	6	6	4	4	4	2.7	264.64	0	64.006	790200	103	20	NbE03056006.1;NbD007021.1	NbE03056006.1;NbD007021.1	406
NaN	15.1351	NaN	15.4905	15.6172	15.6745				-1	8	2	2	6.4	2.7	2.7	152.38	0	118.11	849480	64	17	NbD007175.1;NbE03060263.1	NbD007175.1;NbE03060263.1	413
17.1019	16.9468	17.2169	17.1834	17.1366	17.2123				-1	13	13	12	28.7	28.7	28.7	58.345	0	128.53	3321400	30	50	NbD007233.1;NbE03061217.1;NbE05063492.1;NbD006387.1	NbD007233.1;NbE03061217.1;NbE05063492.1;NbD006387.1	420
14.6449	NaN	NaN	15.8055	15.7868	15.9098				-1	5	4	2	14.3	12.1	6	69.292	0	196.89	760270	35	19	NbD007258.1;NbE03054419.1	NbD007258.1;NbE03054419.1	422
15.3417	NaN	15.7975	15.4309	15.4491	15.3444				-1	1	1	1	8.2	8.2	8.2	18.789	0	26.548	467030	10	14	NbD007329.1;NbD035657.1	NbD007329.1;NbD035657.1	425
14.9216	15.3301	14.8884	16.0288	16.1302	15.9761				-1	5	5	1	22	22	7.4	36.114	0	56.182	3359600	17	40	NbD007349.1;NbE05065600.1;NbD004400.1;NbE44071167.1;NbD030130.1	NbD007349.1	426
18.2746	18.531	18.3892	17.6765	17.5823	17.7092				-1	10	10	2	32.1	32.1	4.3	40.596	0	136.54	7084000	24	84	NbD007457.1;NbD033142.1;NbD005568.1	NbD007457.1	430
19.3178	19.3796	19.2077	18.6016	NaN	18.6529				-1	4	3	1	25.6	21.9	7.3	25.55	0	43.642	11710000	14	43	NbD007460.1	NbD007460.1	431
18.1471	17.8101	17.0549	17.414	17.1279	17.1278				-1	5	5	3	37.4	37.4	26.9	25.595	0	86.475	4067100	15	38	NbE03060319.1;NbD007461.1	NbE03060319.1;NbD007461.1	432
16.5118	16.9839	16.4499	17.4137	17.3897	17.2186				-1	3	3	2	10.1	10.1	7.8	47.993	0	41.306	2198900	19	25	NbD007544.1;NbE44071277.1;NbE03055604.1;NbD010393.1	NbD007544.1;NbE44071277.1	433
18.2496	18.1053	18.4782	19.1315	19.0135	19.4065				-1	9	6	3	51.3	42.7	13.3	14.826	0	323.31	11027000	10	46	NbD007667.1;NbE03062345.1;NbD022964.1	NbD007667.1;NbE03062345.1;NbD022964.1	438
14.5243	NaN	NaN	NaN	14.3733	14.438				-1	3	3	2	10.9	10.9	7.6	49.234	0	23.88	316580	30	15	NbD007678.1;NbE44072435.1;NbD020013.1;NbD049945.1;NbD046815.1	NbD007678.1;NbE44072435.1;NbD020013.1;NbD049945.1;NbD046815.1	439
15.4231	NaN	15.7018	16.4712	16.2887	16.3309				-1	5	5	2	13	13	5.9	58.056	0	53.936	1174200	24	24	NbD007705.1	NbD007705.1	442
NaN	NaN	NaN	15.8469	15.8727	15.914				-1	4	4	3	37.6	37.6	30.1	15.243	0	29.661	839180	7	15	NbD023087.1;NbD007725.1;NbE05063828.1;NbD045001.1;NbD043780.1	NbD023087.1;NbD007725.1;NbE05063828.1;NbD045001.1;NbD043780.1	444
15.6302	15.4217	14.8537	15.9979	15.7491	15.9325				-1	3	3	3	8.1	8.1	8.1	47.512	0	26.781	1827800	20	36	NbE03059012.1;NbD017559.1;NbD007757.1	NbE03059012.1;NbD017559.1;NbD007757.1	449
NaN	NaN	NaN	16.6854	16.6413	16.371				-1	3	3	2	9	9	8.6	50.837	0	44.034	909190	21	12	NbE05067263.1;NbD011152.1;NbD007847.1	NbE05067263.1;NbD011152.1;NbD007847.1	451
16.7235	16.7396	16.5754	16.3186	NaN	16.2305				-1	4	4	4	10.4	10.4	10.4	62.329	0	66.528	1453900	32	21	NbD007849.1	NbD007849.1	452
NaN	NaN	NaN	15.4954	15.1551	15.2888				-1	3	3	3	18.2	18.2	18.2	31.987	0	22.593	292340	16	8	NbD007854.1;NbD027183.1	NbD007854.1;NbD027183.1	453
15.8593	15.7798	15.7952	NaN	15.1512	15.268				-1	2	2	2	8	8	8	30.659	0	32.46	835990	13	17	NbD007863.1;NbD041071.1;NbE03060149.1	NbD007863.1;NbD041071.1;NbE03060149.1	454
NaN	NaN	NaN	16.8833	16.916	16.7776				-1	4	4	4	35.8	35.8	35.8	13.768	0	31.785	1892300	4	25	NbD031784.1;NbD028515.1;NbD010643.1;NbD010400.1;NbD007887.1;NbD042990.1	NbD031784.1;NbD028515.1;NbD010643.1;NbD010400.1;NbD007887.1;NbD042990.1	456
17.7021	17.457	18.0131	18.1588	18.3785	18.3101				-1	3	3	3	19.2	19.2	19.2	17	0	52.357	6271000	6	34	NbD007928.1;NbD052997.1;NbD014016.1;NbE03060435.1;NbD025477.1	NbD007928.1;NbD052997.1;NbD014016.1;NbE03060435.1;NbD025477.1	457
15.0028	15.1487	15.2624	16.5664	16.4296	16.6267				-1	6	6	6	10.9	10.9	10.9	87.207	0	69.32	1826400	39	38	NbD019897.1;NbE05065809.1;NbD007938.1	NbD019897.1;NbE05065809.1;NbD007938.1	458
19.2116	19.3175	18.9314	19.0487	18.8493	18.8513				-1	18	18	3	31.8	31.8	5.5	46.841	0	323.31	17990000	24	136	NbD007982.1	NbD007982.1	460
16.5505	16.4014	16.4209	15.3497	15.4127	15.4753				-1	3	3	3	19	19	19	25.95	0	25.875	1131700	14	23	NbD008015.1;NbD014131.2;NbD014131.1;NbE03058220.1	NbD008015.1;NbD014131.2;NbD014131.1;NbE03058220.1	461
18.3838	18.6567	18.5943	18.4704	18.6137	18.4816				-1	19	7	7	29.1	10.5	10.5	81.632	0	144.51	12509000	41	58	NbD008021.1	NbD008021.1	463
17.5673	NaN	NaN	17.2117	17.0698	16.8054				-1	5	5	5	24.1	24.1	24.1	17.818	0	54.975	2405700	9	21	NbD048818.1;NbD035713.1;NbD031743.1;NbD014632.1;NbD009629.1;NbD008042.1;NbD017729.1	NbD048818.1;NbD035713.1;NbD031743.1;NbD014632.1;NbD009629.1;NbD008042.1	466
16.1133	16.1213	16.0456	16.4624	16.37	16.4696				-1	1	1	1	1.7	1.7	1.7	98.939	0	46.148	1361200	38	18	NbE03056943.1;NbE03060505.1;NbD047156.1;NbD017236.1;NbD008073.1	NbE03056943.1;NbE03060505.1;NbD047156.1;NbD017236.1;NbD008073.1	469
16.3638	16.3715	16.435	16.3326	16.4021	16.1914				-1	7	7	7	21.9	21.9	21.9	47.025	0	123.06	2232800	24	47	NbD008153.1	NbD008153.1	472
NaN	15.9234	16.2254	16.3795	16.4089	NaN				-1	5	5	3	21.9	21.9	14.8	31.649	0	39.82	1133900	18	24	NbD016480.1;NbD008242.1	NbD016480.1;NbD008242.1	475
NaN	NaN	NaN	14.5448	14.5832	14.5804				-1	3	3	3	7.1	7.1	7.1	90.203	0	24.489	259880	25	11	NbE05065991.1;NbD008319.1	NbE05065991.1;NbD008319.1	477
15.4559	15.1093	15.2197	16.7357	16.5971	16.6934				-1	7	7	7	87.2	87.2	87.2	12.174	0	147.26	1878400	7	40	NbD008344.1;NbE44070642.1;NbD016121.1	NbD008344.1;NbE44070642.1;NbD016121.1	478
14.0283	14.3014	14.5036	15.0572	14.9521	15.0474				-1	4	4	2	12.5	12.5	8.6	65.655	0	31.416	491730	34	22	NbD008347.1;NbD016117.1;NbE44072536.1	NbD008347.1;NbD016117.1;NbE44072536.1	479
NaN	NaN	NaN	17.0864	17.0013	17.0869				-1	13	8	8	13.1	9.6	9.6	110.42	0	112.72	2721700	54	32	NbD008377.1;NbE05065732.1	NbD008377.1;NbE05065732.1	481
NaN	NaN	15.3149	17.0233	16.8281	16.7913				-1	6	6	6	18.5	18.5	18.5	49.131	0	253.85	1647700	30	26	NbD008379.1	NbD008379.1	482
19.1566	19.0336	19.1882	18.1012	18.1639	18.4627				-1	8	8	7	18.9	18.9	16	57.151	0	139.93	5552400	28	39	NbD008528.1;NbD038679.1;NbD025121.1	NbD008528.1;NbD038679.1	494
NaN	NaN	NaN	14.8471	14.7055	14.6954				-1	5	5	5	9.8	9.8	9.8	73.926	0	38.239	419720	35	16	NbD008604.1;NbE05064919.1;NbD023032.1	NbD008604.1;NbE05064919.1;NbD023032.1	500
NaN	NaN	NaN	17.9923	17.6957	17.7137				-1	7	3	3	24.6	9.5	9.5	42.085	0	161.02	2065600	22	16	NbE05064534.1;NbD008707.1	NbE05064534.1;NbD008707.1	504
19.1413	19.0493	19.2405	18.8816	19.1294	18.944				-1	8	8	2	34.2	34.2	12.6	29.134	0	128.04	12871000	17	75	NbD008727.1;NbE44070215.1	NbD008727.1;NbE44070215.1	506
NaN	15.4841	15.0071	15.6727	15.8425	15.8575				-1	8	8	3	11.1	11.1	3.6	94.426	0	69.993	1697600	21	41	NbD008756.1	NbD008756.1	507
16.213	16.105	16.8106	16.4039	16.6389	16.4093				-1	5	5	2	36.8	36.8	26.9	27.375	0	139.61	1643000	15	26	NbD008781.1	NbD008781.1	510
20.6876	20.5736	20.3284	19.9596	19.9109	19.8629				-1	23	23	2	69.4	69.4	5.3	37.021	0	323.31	53814000	19	192	NbD008810.1;NbD037531.1;NbD022384.1;NbE03060955.1;NbD048296.1	NbD008810.1	515
NaN	14.3794	14.5989	15.8697	15.6319	15.8582				-1	7	2	2	46.3	13.8	13.8	24.326	0	14.559	642350	11	17	NbD026420.1;NbD009281.1	NbD026420.1;NbD009281.1	535
NaN	NaN	NaN	17.1706	17.1005	16.8572				-1	13	13	7	44	44	22.8	34.666	0	217.22	3658700	11	51	NbD009316.1	NbD009316.1	537
16.8124	16.5758	16.8177	16.6605	16.8689	16.2217				-1	8	8	5	35.8	35.8	24.7	41.289	0	88.514	2622400	28	59	NbE44071637.1;NbD009383.1	NbE44071637.1;NbD009383.1	542
16.0243	16.0038	16.0735	15.8785	16.0095	16.0416				-1	10	2	2	40.1	5.4	5.4	30.627	0	38.572	2641400	16	36	NbD009385.1	NbD009385.1	543
17.6793	17.5696	18.3219	17.9373	18.2343	18.13				-1	11	11	4	22.1	22.1	10.4	76.399	0	170.35	5227300	32	61	NbE03053857.1;NbD029533.1;NbD009403.1	NbE03053857.1;NbD029533.1;NbD009403.1	545
17.2158	17.2434	16.5398	NaN	16.1105	16.1352				-1	3	3	3	35.1	35.1	35.1	21.097	0	25.303	1426700	13	21	NbD009432.1;NbD025980.1	NbD009432.1	546
15.3689	15.4477	15.9493	15.941	15.9733	16.0069				-1	5	5	5	21.8	21.8	21.8	47.333	0	123.18	1773900	26	38	NbE03059359.1;NbD009445.1	NbE03059359.1;NbD009445.1	548
21.3398	21.3321	21.0344	21.1445	21.1747	21.2062				-1	28	28	7	65.8	65.8	20.8	53.143	0	323.31	94118000	23	315	NbD012482.1;NbD009481.1	NbD012482.1;NbD009481.1	550
14.7714	NaN	NaN	16.5117	16.3707	16.5356				-1	3	3	2	15.8	15.8	10.5	19.833	0	33.598	1445900	8	15	NbD034459.1;NbD038231.1;NbD009490.1	NbD034459.1;NbD038231.1;NbD009490.1	553
NaN	NaN	NaN	22.1755	22.2099	22.2884				-1	20	20	12	34.5	34.5	28.4	35.99	0	323.31	94367000	20	247	NbD009566.1;NbE05064499.1;NbD039690.1	NbD009566.1;NbE05064499.1;NbD039690.1	557
NaN	NaN	NaN	17.1039	17.108	17.1731				-1	10	10	3	27.2	27.2	8	29.715	0	129.69	3169600	16	42	NbD010151.1;NbD009589.1;NbD009588.1	NbD010151.1;NbD009589.1;NbD009588.1	559
15.6609	15.7994	15.6602	15.3419	15.2897	15.4472				-1	6	6	6	26.3	26.3	26.3	42.863	0	55.67	1329200	25	30	NbD009596.1	NbD009596.1	560
16.4681	16.5889	15.9975	NaN	14.4076	14.7014				-1	3	3	3	18.6	18.6	18.6	28.459	0	32.294	1073500	12	23	NbD009792.1;NbE05066858.1;NbE05064541.1	NbD009792.1;NbE05066858.1;NbE05064541.1	568
16.712	16.1167	16.7913	NaN	NaN	NaN				-1	4	4	4	9.8	9.8	9.8	83.043	0	26.831	890490	42	18	NbD009812.1	NbD009812.1	570
NaN	NaN	NaN	16.6769	16.5909	16.861				-1	3	3	3	10.2	10.2	10.2	32.586	0	26.594	1813500	11	18	NbD009891.1;NbE44071173.1;NbD005399.1;NbE03060874.1	NbD009891.1;NbE44071173.1;NbD005399.1;NbE03060874.1	573
17.8186	17.4993	17.5107	17.6497	17.5763	NaN				-1	4	4	4	39	39	39	15.053	0	135.79	2304700	7	20	NbD009904.1;NbD005403.1	NbD009904.1;NbD005403.1	575
17.7462	17.7033	17.6714	17.418	17.3999	17.4908				-1	8	8	1	33.3	33.3	4.6	43.039	0	130.24	4594800	20	53	NbD014155.1;NbD010023.1	NbD014155.1;NbD010023.1	577
16.0528	16.3656	16.046	NaN	14.0635	13.4925				-1	11	11	11	48.5	48.5	48.5	39.74	0	86.745	2045700	20	52	NbD010074.1;NbD002351.1	NbD010074.1;NbD002351.1	580
16.5088	NaN	15.8332	NaN	15.9553	15.5969				-1	4	3	3	12.6	10.8	10.8	55.844	0	27.275	1075300	26	18	NbD010108.1	NbD010108.1	581
15.1044	14.7157	15.1721	NaN	NaN	NaN				-1	3	3	3	31.1	31.1	31.1	17.469	0	34.274	436410	7	13	NbE05068286.1;NbD028484.1;NbD010146.1;NbD051875.1;NbE03059962.1;NbD038894.1	NbE05068286.1;NbD028484.1;NbD010146.1;NbD051875.1	582
16.7638	16.6921	16.8137	17.4563	16.992	17.6194				-1	5	5	5	29.7	29.7	29.7	24.805	0	44.731	2866300	11	33	NbE05062854.1;NbD010207.1;NbE44070534.1;NbD022358.1;NbE05064075.1;NbE44074481.1	NbE05062854.1;NbD010207.1;NbE44070534.1	583
NaN	NaN	NaN	16.864	16.9729	17.0639				-1	3	3	3	12.7	12.7	12.7	30.121	0	78.803	2279600	12	27	NbD010243.1;NbE05064396.1;NbD007578.1	NbD010243.1;NbE05064396.1	586
17.235	16.9372	16.9115	16.6752	16.8846	16.5402				-1	7	7	2	19	19	3.9	55.135	0	104.54	2513900	26	38	NbD010296.1	NbD010296.1	588
17.1989	17.202	17.5031	17.2672	17.5208	17.4856				-1	7	4	4	73.9	53.2	53.2	12.482	0	118	4541800	5	35	NbD032965.1;NbD010327.1	NbD032965.1;NbD010327.1	589
16.6114	16.8918	16.9626	16.4899	16.3994	16.2495				-1	7	7	6	25.3	25.3	18.2	51.603	0	64.418	1733300	26	31	NbE03055876.1;NbD033090.1;NbD010358.1;NbE44074640.1	NbE03055876.1;NbD033090.1;NbD010358.1;NbE44074640.1	590
NaN	NaN	NaN	15.9016	15.9978	15.9071				-1	5	5	5	31.7	31.7	31.7	22.601	0	34.825	908310	13	21	NbD011591.1;NbD010426.1	NbD011591.1;NbD010426.1	593
15.3794	15.508	NaN	15.0641	15.1008	15.0521				-1	6	6	6	27.2	27.2	27.2	34.243	0	73.259	991900	15	27	NbD010494.1;NbD016694.1	NbD010494.1;NbD016694.1	595
15.2827	15.1385	15.5713	14.8391	15.067	15.0736				-1	2	2	2	6.6	6.6	6.6	54.661	0	116.03	911340	24	24	NbD010512.1	NbD010512.1	596
NaN	NaN	NaN	16.9239	16.5141	16.5153				-1	1	1	1	9.8	9.8	9.8	15.836	0.0014808	8.2319	1076700	9	12	NbD010517.1	NbD010517.1	597
16.7619	16.925	16.7006	15.9353	16.1227	16.2424				-1	6	4	4	29.6	20.4	20.4	37.658	0	47.948	1607100	19	24	NbD010574.1;NbE05067333.1;NbD015710.1	NbD010574.1;NbE05067333.1;NbD015710.1	600
NaN	NaN	NaN	15.3107	15.4764	15.4828				-1	5	1	1	18.7	3.1	3.1	50.499	0	14.476	471280	21	10	NbD010600.1;NbD035995.1;NbE44072225.1	NbD010600.1;NbD035995.1;NbE44072225.1	603
18.6487	18.4479	18.7506	19.0209	19.1823	19.0746				-1	5	2	2	11.8	4.5	4.5	49.745	0	58.561	5986900	23	19	NbD019274.1;NbD023165.1;NbD010647.1;NbE03055415.1;NbD034666.1;NbD014003.1;NbD035848.1;NbD023141.1;NbD041465.1;NbD031389.1;NbD005893.1	NbD019274.1;NbD023165.1;NbD010647.1;NbE03055415.1;NbD034666.1;NbD014003.1;NbD035848.1;NbD023141.1	604
NaN	NaN	NaN	16.0613	15.7078	15.8506				-1	3	3	3	5.9	5.9	5.9	63.977	0	20.885	518440	18	13	NbD010749.1;NbE44073505.1	NbD010749.1;NbE44073505.1	608
17.5666	17.2703	17.7621	17.9155	17.985	17.8657				-1	4	4	3	12.6	12.6	8.1	47.811	0	68.526	4029700	22	29	NbD010775.1	NbD010775.1	610
16.8561	NaN	NaN	18.6328	18.4227	18.5238				-1	9	4	4	54.8	32.2	32.2	16.389	0	167.47	5707800	10	35	NbD019774.1;NbD010796.1	NbD019774.1;NbD010796.1	612
17.4496	17.2999	16.8705	15.7766	16.0327	16.1108				-1	5	5	3	39	39	18.5	34.254	0	188.78	2577700	16	45	NbD010954.1;NbE05067852.1	NbD010954.1;NbE05067852.1	617
NaN	NaN	NaN	16.0803	16.023	16.3516				-1	2	2	2	14.7	14.7	14.7	10.809	0	16.58	900080	4	15	NbD038435.1;NbD010962.1	NbD038435.1;NbD010962.1	618
18.3942	18.1255	18.5307	18.658	18.5854	18.5486				-1	18	15	15	34.2	28.8	28.8	64.604	0	211.7	9437900	35	102	NbD010968.1;NbD044203.1;REV__NbD015067.1	NbD010968.1;NbD044203.1	620
15.4703	15.4564	NaN	15.7288	15.6059	15.5086				-1	3	3	3	5.1	5.1	5.1	94.826	0	31.083	1080500	41	23	NbD010990.1;NbD041092.1	NbD010990.1;NbD041092.1	622
17.5924	17.5054	17.7236	17.3889	17.4491	17.4364				-1	14	14	14	49.7	49.7	49.7	41.235	0	323.31	8808000	21	112	NbD011005.1;NbD037366.1	NbD011005.1;NbD037366.1	623
NaN	NaN	NaN	16.7156	16.6135	16.6382				-1	2	2	2	10.8	10.8	10.8	45.734	0	18.254	688740	18	11	NbD011036.1;NbD002701.1	NbD011036.1;NbD002701.1	625
16.9643	16.7474	16.7419	15.721	15.7671	15.7349				-1	4	4	4	28.1	28.1	28.1	30.093	0	106.86	2265000	13	41	NbD011066.1;NbD049922.1	NbD011066.1;NbD049922.1	626
16.9074	16.8792	17.1598	17.1943	16.701	16.909				-1	3	3	3	40.7	40.7	40.7	14.466	0	80.874	2569500	7	26	NbD037117.1;NbD011186.1	NbD037117.1;NbD011186.1	632
18.3582	18.1344	18.6863	19.5613	19.5673	19.545				-1	10	10	3	29.9	29.9	16.7	25.018	0	128.83	14282000	11	65	NbD011194.1;NbD021567.1;NbD041935.1	NbD011194.1;NbD021567.1;NbD041935.1	634
15.7397	15.6826	15.913	15.8425	15.8363	15.8302				-1	6	6	2	25.2	25.2	5	30.488	0	74.256	1181100	17	30	NbD011204.1;NbD029765.1;NbD002088.1	NbD011204.1;NbD029765.1;NbD002088.1	636
17.6484	17.2026	17.741	17.8096	17.7998	17.8255				-1	4	4	3	12.9	12.9	12.9	40.05	0	122.59	6923100	19	81	NbE05062949.1;NbE03057461.1;NbD050123.1;NbD011215.1;NbD029391.1	NbE05062949.1;NbE03057461.1;NbD050123.1;NbD011215.1	638
18.0281	18.152	18.399	18.0265	18.0841	18.0572				-1	7	7	2	16.2	16.2	6.3	48.01	0	128.28	8155400	18	60	NbD011249.1	NbD011249.1	639
NaN	18.1175	19.0657	18.9669	18.9628	19.0819				-1	23	2	2	50	8.1	8.1	42.753	0	26.596	4930200	21	17	NbD011459.1;NbE44069821.1	NbD011459.1;NbE44069821.1	648
15.6712	15.6562	NaN	16.3535	16.2005	16.319				-1	3	3	3	14.1	14.1	14.1	32.427	0	73.549	1400100	17	19	NbD037094.1;NbD011495.1	NbD037094.1;NbD011495.1	650
15.4866	15.5571	NaN	15.5455	15.4483	15.4693				-1	7	7	7	15.2	15.2	15.2	34.995	0	73.107	1262300	12	32	NbD011498.1;NbE44070999.1;NbD050339.1;NbE44072495.1	NbD011498.1;NbE44070999.1;NbD050339.1;NbE44072495.1	651
15.2245	15.4247	15.5109	16.4747	16.5001	16.4785				-1	4	4	4	16.6	16.6	16.6	27.298	0	33.189	1081100	13	23	NbD011515.1;NbD045364.1;NbE03055103.1	NbD011515.1;NbD045364.1;NbE03055103.1	652
NaN	15.4738	NaN	15.3854	15.4393	15.5685				-1	4	4	4	8.1	8.1	8.1	97.77	0	43.713	761120	47	18	NbE03060987.1;NbD011550.1	NbE03060987.1;NbD011550.1	656
NaN	NaN	15.6719	16.1498	15.8208	NaN				-1	2	2	2	5.5	5.5	5.5	55.045	0	16.972	759800	22	12	NbD011627.1	NbD011627.1	661
NaN	NaN	16.5543	16.057	16.0862	16.3774				-1	7	5	5	16.5	13.7	13.7	42.909	0	49.962	1291500	19	25	NbD011638.1;NbD027256.1	NbD011638.1;NbD027256.1	663
NaN	NaN	NaN	15.2678	15.3843	15.3809				-1	5	3	3	30.9	21.8	21.8	33.419	0	62.343	662200	17	16	NbD011646.1	NbD011646.1	664
17.5323	17.4432	17.4444	17.6398	17.6972	17.6024				-1	8	8	7	23	23	20.2	39.06	0	195.94	6054900	17	68	NbD011698.1	NbD011698.1	669
16.2001	16.019	15.5811	16.0179	16.3998	16.5094				-1	11	11	11	20.1	20.1	20.1	87.773	0	105.48	2285500	42	48	NbD011778.1;NbD043052.1;NbE03058543.1	NbD011778.1;NbD043052.1;NbE03058543.1	672
NaN	NaN	NaN	16.7175	16.7549	16.7778				-1	8	8	8	33.1	33.1	33.1	49.45	0	270.81	3694600	22	40	NbD011790.1;NbD045030.1	NbD011790.1	673
NaN	NaN	NaN	16.2942	16.317	16.3184				-1	6	3	3	25.5	18.5	18.5	30.037	0	44.473	2390200	15	34	NbD011824.1;NbD051455.1	NbD011824.1;NbD051455.1	675
NaN	NaN	NaN	14.6214	14.6919	14.8274				-1	2	2	2	6.5	6.5	6.5	66.106	0	15.646	337330	31	14	NbD011841.1;NbE05067041.1;NbD039704.1;NbE44073793.1	NbD011841.1;NbE05067041.1;NbD039704.1;NbE44073793.1	677
NaN	NaN	NaN	16.1869	16.1177	16.1173				-1	3	3	3	36.3	36.3	36.3	13.82	0	35.105	1273400	4	19	NbD039705.1;NbD011842.1	NbD039705.1;NbD011842.1	678
19.3885	19.5321	19.155	18.5687	18.9704	18.842				-1	22	22	8	47.4	47.4	22.8	56.819	0	290.81	18522000	24	133	NbD011866.1	NbD011866.1	679
17.6236	17.5564	17.7736	17.9569	17.875	17.8712				-1	4	4	4	24.7	24.7	24.7	30.788	0	57.864	6604500	16	55	NbD011985.1	NbD011985.1	680
16.6296	16.7596	16.185	16.2048	16.377	16.4703				-1	8	4	0	33.6	19.4	0	33.187	0	83.206	1657000	17	22	NbD011993.1	NbD011993.1	681
15.0791	NaN	NaN	15.5667	15.3358	15.4887				-1	6	6	6	18	18	18	47.175	0	51.67	1098900	24	30	NbD012001.1;NbD047069.1;NbD027673.1	NbD012001.1;NbD047069.1;NbD027673.1	682
NaN	NaN	NaN	18.9412	18.5303	18.4723				-1	1	1	1	21.7	21.7	21.7	8.0836	0	26.653	2081500	3	8	NbD042901.1;NbD036606.1;NbD034752.1;NbD012039.1	NbD042901.1;NbD036606.1;NbD034752.1;NbD012039.1	683
17.3812	17.3489	17.2057	NaN	NaN	16.3997				-1	4	4	4	15.7	15.7	15.7	30.365	0	36.492	1582700	15	23	NbD012148.1;NbD020527.1	NbD012148.1;NbD020527.1	689
NaN	NaN	NaN	14.8051	14.5859	14.4663				-1	5	5	1	7.9	7.9	2.3	89.805	0	31.153	316760	45	13	NbE44073470.1;NbE03056198.1;NbD012184.1;NbD043289.1	NbE44073470.1;NbE03056198.1;NbD012184.1;NbD043289.1	691
19.2028	19.122	18.3776	18.8008	19.0939	18.8489				-1	9	4	4	24.5	11	11	47.727	0	82.197	7312900	18	36	NbD012265.1;NbE03054480.1;NbD023708.1	NbD012265.1;NbE03054480.1;NbD023708.1	695
20.5869	20.5866	20.518	20.7386	20.7784	20.5377				-1	13	13	7	40.3	40.3	20.2	51.778	0	323.31	20074000	30	84	NbD012284.1;NbD021385.1;NbD014990.1;NbE03054611.1;NbD026379.1	NbD012284.1	696
17.6721	17.7056	17.6646	NaN	NaN	NaN				-1	5	5	1	30.6	30.6	8.5	29.238	0	39.95	1988500	13	23	NbD012332.1	NbD012332.1	700
14.8388	14.5947	14.5906	NaN	NaN	NaN				-1	2	2	2	14.2	14.2	14.2	26.234	0	15.973	321590	16	13	NbD012335.1;NbE44071746.1;NbD020124.1	NbD012335.1;NbE44071746.1;NbD020124.1	701
16.1379	16.2412	16.4757	15.6511	15.7752	15.8793				-1	6	6	2	20.9	20.9	8.5	42.953	0	74.456	1413500	21	32	NbD012395.1;NbE44070424.1	NbD012395.1	703
NaN	NaN	NaN	15.9433	15.9769	15.7938				-1	6	6	6	18.3	18.3	18.3	51.188	0	44.397	1438200	28	29	NbD039165.1;NbD012404.1	NbD039165.1;NbD012404.1	704
16.5719	16.4699	16.6552	15.9567	15.9973	15.9997				-1	4	4	4	23.2	23.2	23.2	24.668	0	90.428	1828900	10	32	NbD012410.1;NbE03059259.1;NbD022339.1;NbE05067756.1	NbD012410.1;NbE03059259.1;NbD022339.1;NbE05067756.1	705
16.0392	15.8385	16.1914	NaN	16.0067	NaN				-1	3	3	3	11	11	11	46.042	0	35.612	1363500	28	21	NbD012465.1;NbD026297.1;NbD025456.1	NbD012465.1;NbD026297.1;NbD025456.1	709
NaN	NaN	NaN	14.5555	14.5287	14.5751				-1	2	2	2	11	11	11	20.83	0	30.922	413790	8	15	NbE05068742.1;NbE44073742.1;NbD012627.1;NbE05068326.1;NbD011403.1	NbE05068742.1;NbE44073742.1;NbD012627.1;NbE05068326.1;NbD011403.1	716
NaN	NaN	14.8989	17.4477	17.0046	17.2667				-1	8	8	2	34.1	34.1	13.3	24.673	0	142.42	3657400	7	45	NbD012644.1	NbD012644.1	717
NaN	NaN	16.6236	16.9824	17.1146	16.9173				-1	5	5	5	9.6	9.6	9.6	57.239	0	142.04	1038400	31	16	NbD041088.1;NbD012685.1	NbD041088.1;NbD012685.1	718
16.3868	16.1077	16.2352	NaN	NaN	NaN				-1	5	5	0	45.4	45.4	0	20.37	0	33.972	1316800	11	17	NbD012820.1;NbE03054988.1	NbD012820.1;NbE03054988.1	726
19.7616	19.3315	19.6076	18.762	18.7049	18.9174				-1	32	3	3	47.6	11.3	11.3	52.672	0	99.498	10460000	23	41	NbD012851.1;NbD052725.1;NbD015971.1;NbE03059648.1	NbD012851.1;NbD052725.1	727
15.7648	15.9056	15.7603	15.7438	15.8014	15.927				-1	6	6	1	22.1	22.1	4	45.921	0	77.84	2026500	23	40	NbD012883.1	NbD012883.1	730
15.7847	16.0314	16.4301	16.5163	16.6087	16.33				-1	4	4	4	7.1	7.1	7.1	59.528	0	34.532	1093500	28	23	NbD012914.2;NbD012914.1;NbE05065274.1;NbE05065273.1;NbD036539.1	NbD012914.2;NbD012914.1;NbE05065274.1;NbE05065273.1	733
16.7917	16.8202	16.4252	15.819	15.8922	16.0375				-1	3	3	3	12.5	12.5	12.5	33.701	0	67.219	1628800	14	24	NbD012946.1	NbD012946.1	735
NaN	NaN	NaN	16.0109	16.2062	16.1838				-1	2	2	2	9	9	9	24.488	0	14.117	848090	13	12	NbD012970.1;NbD038795.1;NbD004558.1	NbD012970.1;NbD038795.1;NbD004558.1	736
16.0482	15.9238	16.1599	16.0964	16.1947	16.2041				-1	9	9	8	14.6	14.6	9.9	69.683	0	139.49	2095800	37	45	NbD012999.1;NbE05064976.1;NbD002058.1;NbE44072059.1	NbD012999.1;NbE05064976.1;NbD002058.1;NbE44072059.1	738
15.5181	15.4124	15.3638	NaN	NaN	NaN				-1	2	2	2	13.6	13.6	13.6	36.318	0	42.206	352230	18	12	NbD034434.1;NbD034433.1;NbD013009.1;NbD013008.1	NbD034434.1;NbD034433.1;NbD013009.1;NbD013008.1	739
18.6947	18.5172	18.6183	19.0163	19.0308	19.0361				-1	19	19	10	50.4	50.4	31.2	42.532	0	323.31	20697000	23	121	NbD013237.1	NbD013237.1	746
18.4794	18.4351	18.1678	18.0652	18.1029	18.164				-1	8	8	6	29.7	29.7	22.9	32.317	0	178.86	6401600	13	60	NbE05067404.1;NbE44073898.1;NbD013238.1	NbE05067404.1;NbE44073898.1;NbD013238.1	747
15.3537	15.3304	15.331	15.896	15.8192	15.9318				-1	4	4	4	18	18	18	37.95	0	54.036	1156500	21	29	NbD013241.1	NbD013241.1	748
17.1584	16.9028	16.6035	17.2795	NaN	16.8248				-1	8	4	4	22.6	12.9	12.9	63.287	0	71.038	1901600	37	25	NbD013269.1	NbD013269.1	749
17.1722	17.0663	17.1983	16.7083	16.3666	16.8848				-1	5	5	5	12.5	12.5	12.5	42.495	0	86.668	3026200	17	36	NbD030112.1;NbD013274.1	NbD030112.1;NbD013274.1	750
NaN	15.9821	15.8827	NaN	15.5348	NaN				-1	6	6	3	41.8	41.8	19.7	13.546	0	64.638	1316900	9	24	NbD013286.1	NbD013286.1	751
NaN	NaN	NaN	16.3837	16.2524	16.26				-1	2	2	1	7.8	7.8	2.4	63.254	0	31.561	682870	29	12	NbD025141.1;NbD013327.1	NbD025141.1;NbD013327.1	752
19.095	19.3857	18.4596	20.1701	19.5675	19.5746				-1	24	5	0	54.2	13.1	0	46.93	0	188.57	14362000	23	42	NbD015306.1;NbD015305.1;NbD014350.1;NbD013348.1	NbD015306.1;NbD015305.1;NbD014350.1;NbD013348.1	755
18.6809	18.9156	19.1206	18.5973	18.584	18.7686				-1	24	24	23	71.9	71.9	67.6	54.179	0	323.31	19341000	25	129	NbD013365.1;NbD021332.1;NbD006622.1;NbD011800.1;NbE44069573.1;NbE03060395.1;NbE05064852.1;NbD005629.1	NbD013365.1;NbD021332.1;NbD006622.1;NbD011800.1;NbE44069573.1;NbE03060395.1	756
16.4013	16.3461	NaN	16.7103	16.6729	16.2846				-1	6	6	6	13.4	13.4	13.4	51.036	0	141.1	1471400	21	27	NbD013463.1;NbE03054310.1;NbD009048.1	NbD013463.1;NbE03054310.1;NbD009048.1	760
18.3848	18.4511	17.1743	19.3157	19.2962	19.3019				-1	8	8	8	12.2	12.2	12.2	97.918	0	138.87	11895000	46	66	NbD013513.1;NbE03055932.1;NbD053068.1;NbD000974.1	NbD013513.1;NbE03055932.1;NbD053068.1	761
NaN	NaN	NaN	16.6311	16.616	16.6436				-1	18	18	10	22	22	15.4	142.31	0	269.03	3725200	64	73	NbD013541.1;NbE03057304.1	NbD013541.1;NbE03057304.1	762
16.3617	16.353	15.8707	15.8504	15.509	15.2905				-1	5	5	5	7.1	7.1	7.1	64.91	0	51.651	1275200	30	27	NbE03059799.1;NbD025460.1;NbE44073179.1;NbD013545.1	NbE03059799.1;NbD025460.1;NbE44073179.1;NbD013545.1	763
16.1857	NaN	16.5601	17.2547	17.0605	17.0368				-1	5	5	1	25.4	25.4	12.9	28.056	0	54.417	2453500	13	34	NbD013742.1	NbD013742.1	771
NaN	15.6333	14.9973	NaN	14.7114	14.9912				-1	6	6	1	25.6	25.6	4.8	39.076	0	50.048	906950	14	25	NbD013760.1;NbE05067527.1;NbE03059840.1	NbD013760.1;NbE05067527.1;NbE03059840.1	773
20.9069	21.0054	20.892	20.8055	20.9071	20.9554				-1	37	37	7	40.1	40.1	6.8	93.956	0	323.31	118210000	43	398	NbE05068830.1;NbD013853.1;NbE44073635.1;NbD014347.1;NbE05067878.1	NbE05068830.1;NbD013853.1;NbE44073635.1;NbD014347.1	774
16.6918	16.9588	16.6121	16.385	16.5705	16.5848				-1	15	15	15	33.6	33.6	33.6	45.918	0	323.31	6906300	25	105	NbD013858.1;NbD002977.1	NbD013858.1	775
17.9373	17.801	18.1909	18.1401	18.3187	18.1981				-1	3	3	3	9.1	9.1	9.1	40.095	0	68.401	3747300	20	19	NbD047959.1;NbD013954.1	NbD047959.1;NbD013954.1	780
NaN	NaN	15.9672	16.2551	16.1447	16.1581				-1	3	3	3	12.2	12.2	12.2	60.457	0	72.552	1586400	38	26	NbD013967.1;NbD052931.1	NbD013967.1;NbD052931.1	782
NaN	NaN	NaN	16.1973	16.2857	16.271				-1	10	10	3	17.7	17.7	6	109.32	0	72.929	1630000	58	29	NbD014013.1	NbD014013.1	786
17.7007	17.5191	18.3102	19.227	18.9731	18.9423				-1	5	4	3	24	18.3	11.8	26.171	0	113.31	8495800	12	43	NbD014102.1;NbE03061157.1;NbD006207.1;NbE44072515.1	NbD014102.1;NbE03061157.1;NbD006207.1;NbE44072515.1	790
19.1909	19.3472	19.1948	19.1085	19.3041	19.3088				-1	20	20	5	30.6	30.6	10.4	81.334	0	323.31	26608000	42	174	NbD014128.1	NbD014128.1	792
13.34	NaN	NaN	14.2734	14.2455	14.2895				-1	1	1	1	2.3	2.3	2.3	77.765	0.0014778	8.2073	280990	32	14	NbD014147.1;NbD042139.1	NbD014147.1;NbD042139.1	794
16.1957	16.1931	16.2152	NaN	NaN	NaN				-1	2	2	2	6.3	6.3	6.3	32.295	0	16.381	401310	17	10	NbD014174.1	NbD014174.1	796
17.6213	NaN	17.95	18.4675	18.3787	18.617				-1	3	3	3	8.5	8.5	8.5	45.087	0	76.871	3840700	16	23	NbE03053595.1;NbD043581.1;NbD014202.1	NbE03053595.1;NbD043581.1;NbD014202.1	800
18.6876	18.757	18.5026	18.3182	18.4235	18.5077				-1	10	10	7	22.9	22.9	14.3	46.643	0	323.31	14416000	19	106	NbD014257.1;NbD022590.1;NbE03059756.1	NbD014257.1;NbD022590.1;NbE03059756.1	805
16.916	16.678	17.3667	17.7796	17.447	17.4137				-1	9	3	3	54.1	23.8	23.8	18.044	0	22.1	3065600	10	25	NbD014322.1	NbD014322.1	810
NaN	NaN	NaN	19.0219	18.6782	18.264				-1	27	5	0	56.6	18.8	0	44.732	0	257.01	3683100	23	26	NbD014326.1	NbD014326.1	811
16.4138	NaN	16.4943	NaN	NaN	17.4052				-1	5	3	3	27.6	24.9	24.9	17.392	0	38.068	871600	12	14	NbE03054587.1;NbE44069955.1;NbD014335.1;NbD028293.1	NbE03054587.1;NbE44069955.1;NbD014335.1;NbD028293.1	813
15.837	16.1757	15.9262	16.0765	16.0845	16.184				-1	7	7	6	14.2	14.2	12.5	75.858	0	47.773	1668300	41	37	NbD014565.1;NbD001761.1	NbD014565.1;NbD001761.1	818
16.9029	17.0486	17.004	17.1354	17.2762	17.2702				-1	17	17	8	17.9	17.9	9.2	88.059	0	200.35	11768000	41	119	NbD014644.1;NbD045772.1;NbD017469.1;NbD029986.1;NbD016286.1;NbD039609.1;NbD011401.1	NbD014644.1;NbD045772.1;NbD017469.1;NbD029986.1;NbD016286.1;NbD039609.1	824
20.383	20.4455	20.6483	20.0216	20.1014	20.0395				-1	26	26	11	70.3	70.3	30.1	35.919	0	323.31	52971000	21	243	NbD014817.1	NbD014817.1	832
15.2773	14.7983	NaN	16.5981	16.4104	16.351				-1	5	5	2	30	30	6.3	25.721	0	40.9	1483400	7	28	NbD014899.1;NbE05064693.1	NbD014899.1;NbE05064693.1	838
16.9863	17.2394	17.0065	NaN	NaN	NaN				-1	3	3	3	10.3	10.3	10.3	45.026	0	28.995	1728600	25	15	NbD014907.1;NbD033327.1	NbD014907.1;NbD033327.1	840
17.7634	17.6231	16.9616	16.7826	16.5212	16.8101				-1	6	6	6	29.3	29.3	29.3	19.001	0	144.32	2591700	10	50	NbD014996.1;NbE05067080.1;NbE44071340.1	NbD014996.1;NbE05067080.1;NbE44071340.1	844
17.9803	17.9732	18.267	18.7825	18.7189	18.6105				-1	6	6	6	24.5	24.5	24.5	40.881	0	226.99	5939400	20	48	NbD015087.1;NbE05068498.1;NbD004456.1	NbD015087.1;NbE05068498.1;NbD004456.1	846
19.0538	19.1339	19.2531	19.2638	19.1747	19.2442				-1	9	6	5	45.9	40.8	33.3	28.797	0	59.412	12447000	15	34	NbD045776.1;NbD015146.1	NbD045776.1;NbD015146.1	848
16.642	16.2144	16.5717	15.3209	15.4929	15.3451				-1	3	3	3	8	8	8	48.646	0	43.505	1043300	20	23	NbE03055740.1;NbD015255.1	NbE03055740.1;NbD015255.1	851
18.5827	18.4835	18.3938	16.3213	16.7832	16.5169				-1	10	10	0	62.4	62.4	0	20.27	0	231.3	4055200	10	46	NbD015262.1;NbD015261.1;NbE03059928.1;NbE44074020.1	NbD015262.1;NbD015261.1	852
16.7081	16.5825	15.5549	16.4942	16.536	16.7152				-1	34	4	4	38.1	4.6	4.6	94.431	0	61.225	4373400	43	58	NbD015310.1	NbD015310.1	855
NaN	NaN	15.0273	15.4232	NaN	15.5978				-1	3	3	3	20.9	20.9	20.9	34.478	0	45.445	652580	13	16	NbE03061318.1;NbD039428.1;NbD015371.1	NbE03061318.1;NbD039428.1;NbD015371.1	858
19.051	19.2672	18.8195	18.221	18.2997	18.4958				-1	14	14	2	47.1	47.1	12.3	37.613	0	271.26	13078000	19	110	NbD015375.1	NbD015375.1	859
NaN	NaN	NaN	16.0677	15.8833	15.9271				-1	8	8	4	10.2	10.2	5.6	167.16	0	112.27	1113100	74	29	NbE03060284.1;NbD015387.1	NbE03060284.1;NbD015387.1	862
20.1523	20.0026	20.0398	20.2428	20.2309	20.2017				-1	18	18	6	47.7	47.7	10.9	37.302	0	323.31	67165000	17	183	NbD015455.1	NbD015455.1	865
16.4002	15.9376	NaN	16.6876	16.7921	16.7192				-1	6	6	1	17	17	3.4	58.222	0	53.299	1605900	28	26	NbD015467.1	NbD015467.1	866
18.6277	18.5293	18.6465	21.9076	21.9905	22.0028				-1	66	66	18	67.3	67.3	19.6	107.79	0	323.31	143900000	57	480	NbD015511.1	NbD015511.1	869
17.56	17.155	17.6345	17.6555	17.5475	17.357				-1	3	3	3	13.7	13.7	13.7	30.474	0	57.29	2516900	19	18	NbE05068538.1;NbE05067353.1;NbD015518.1;NbD033721.1	NbE05068538.1;NbE05067353.1;NbD015518.1;NbD033721.1	870
17.4523	17.4568	17.4707	NaN	NaN	NaN				-1	3	3	3	12.8	12.8	12.8	41.21	0	85.674	2155800	14	16	NbD015558.1	NbD015558.1	873
17.5224	17.6174	17.6707	NaN	NaN	17.6819				-1	3	3	3	11.2	11.2	11.2	38.08	0	34.36	2387000	17	16	NbD015663.1;NbD049428.1	NbD015663.1;NbD049428.1	881
NaN	NaN	NaN	15.1026	15.7742	16.506				-1	1	1	1	12.6	12.6	12.6	13.145	0	11.254	508720	6	13	NbD015749.1	NbD015749.1	884
NaN	NaN	NaN	15.1086	15.1282	15.1046				-1	7	7	3	9	9	3.9	159.6	0	120.94	911430	80	25	NbD015816.1;NbE44073706.1	NbD015816.1;NbE44073706.1	891
NaN	NaN	NaN	17.4697	17.1943	17.5078				-1	2	2	2	12.8	12.8	12.8	38.141	0	56.18	1542000	16	16	NbD015928.1	NbD015928.1	893
NaN	NaN	14.7417	16.1396	15.9457	16.0015				-1	4	4	3	5.5	5.5	4.3	104.45	0	77.163	1119200	32	22	NbE03053434.1;NbD016041.1;NbE05064043.1;NbD049742.1;NbD038446.1	NbE03053434.1;NbD016041.1;NbE05064043.1;NbD049742.1	896
NaN	NaN	NaN	17.0975	17.2978	16.5344				-1	9	2	2	29.9	7.3	7.3	34.572	0	163.48	974740	10	12	NbD016046.1	NbD016046.1	897
15.4876	15.4644	15.1719	18.5917	18.6645	18.6626				-1	12	12	12	25.3	25.3	25.3	54.035	0	261.54	12390000	24	67	NbD016173.1;NbD024435.1	NbD016173.1;NbD024435.1	902
20.0378	20.1421	20.017	19.9922	19.8528	20.0826				-1	7	7	7	13.7	13.7	13.7	61.782	0	247.7	14269000	28	50	NbD016309.1;NbE05065667.1;NbD021627.1	NbD016309.1;NbE05065667.1;NbD021627.1	905
17.653	17.9828	17.8308	16.9448	17.1711	17.0107				-1	18	18	4	42.1	42.1	7.9	44.236	0	210.86	8029700	25	103	NbD016339.1	NbD016339.1	907
16.7791	16.9828	15.9624	NaN	16.5315	16.5804				-1	5	5	5	32.3	32.3	32.3	29.2	0	46.733	1488500	14	27	NbD016367.1;NbE03059138.1;NbE03056077.1;NbD033234.1	NbD016367.1;NbE03059138.1	910
15.5924	15.6072	15.6123	16.1886	16.0379	16.2474				-1	12	12	7	18.4	18.4	6.3	59.589	0	323.31	4920900	26	73	NbD016376.1	NbD016376.1	911
16.3148	16.1971	16.7244	17.8311	17.7974	17.8955				-1	5	2	2	26.7	17.6	17.6	25.028	0	47.586	4121300	14	23	NbE05063272.1;NbD016395.1	NbE05063272.1;NbD016395.1	913
16.3331	16.0623	16.5396	16.2703	16.3147	16.2771				-1	2	2	2	30.4	30.4	30.4	14.842	0	28.477	1836500	9	27	NbD046126.1;NbD040199.1;NbD016474.1;NbE05064467.1;NbE44073196.1	NbD046126.1;NbD040199.1;NbD016474.1;NbE05064467.1;NbE44073196.1	918
17.711	NaN	17.618	16.8234	16.9031	16.9904				-1	2	2	2	10.3	10.3	10.3	38.441	0	36.214	1672200	21	17	NbD016523.1;NbD026345.1	NbD016523.1;NbD026345.1	920
13.9274	NaN	13.9506	NaN	NaN	14.9568				-1	9	2	2	15.7	4.1	4.1	76.477	0	22.071	367400	32	14	NbD016533.1;NbD006996.1;NbE03055581.1	NbD016533.1;NbD006996.1;NbE03055581.1	921
NaN	NaN	NaN	16.2595	16.1181	16.0932				-1	5	5	5	33.3	33.3	33.3	24.173	0	92.886	1415900	9	26	NbD016565.1;NbE03058186.1;NbD051974.1;NbD018483.1;NbD015852.1;NbD006632.1;NbE44069586.1	NbD016565.1;NbE03058186.1;NbD051974.1;NbD018483.1;NbD015852.1;NbD006632.1;NbE44069586.1	923
NaN	15.7495	15.8134	16.2013	15.9149	15.8253				-1	34	8	8	43.9	11	11	69.06	0	70.973	1664100	32	34	NbD016708.1	NbD016708.1	928
15.3371	15.1624	15.2989	NaN	16.117	16.1483				-1	4	2	2	15	8.6	8.6	35.935	0	36.779	911010	17	16	NbD016828.1	NbD016828.1	931
NaN	NaN	NaN	17.9969	17.9949	17.9106				-1	7	7	1	37.3	37.3	10.7	16.345	0	104.55	3695400	6	30	NbD043694.1;NbD041460.1;NbD016868.1;NbD048288.1;NbD029946.1	NbD043694.1;NbD041460.1;NbD016868.1;NbD048288.1;NbD029946.1	933
19.6002	19.6186	19.5693	19.9158	19.8375	19.726				-1	11	11	11	22.2	22.2	22.2	55.404	0	323.31	17460000	23	85	NbD016904.1;NbD037497.1;NbE44071666.1;NbE03056567.1;NbE03056568.1	NbD016904.1;NbD037497.1;NbE44071666.1;NbE03056567.1	937
NaN	NaN	NaN	17.8015	17.7429	17.8341				-1	11	11	2	45.6	45.6	10.7	23.584	0	107.89	5203200	11	56	NbD016943.1;NbD031589.1;NbD037388.1;NbD036571.1;NbD023451.1;NbD027710.1	NbD016943.1;NbD031589.1	941
17.9098	17.679	17.4817	17.6495	17.4633	17.0972				-1	6	4	4	15.9	13.4	13.4	65.708	0	78.34	2224400	30	23	NbD035904.1;NbD017030.1	NbD035904.1;NbD017030.1	944
16.1803	16.1315	16.5133	17.3503	17.184	17.2299				-1	6	6	0	19.6	19.6	0	43.323	0	133.59	3528800	26	42	NbD017043.1;NbD035485.1	NbD017043.1;NbD035485.1	945
NaN	NaN	NaN	15.9391	15.9415	15.7746				-1	8	8	4	34.2	34.2	16.2	28.169	0	84.576	1322600	14	34	NbD017089.1;NbE03056336.1;NbD007127.1;NbD005240.1;NbD037627.1;NbD033219.1	NbD017089.1;NbE03056336.1;NbD007127.1;NbD005240.1;NbD037627.1;NbD033219.1	947
15.999	15.7651	15.6732	16.7414	16.7448	16.7765				-1	9	9	9	13.2	13.2	13.2	120.32	0	166.72	2352600	36	49	NbE03058426.1;NbD017133.1	NbE03058426.1;NbD017133.1	950
17.0013	16.9842	17.2917	17.1319	16.6352	NaN				-1	4	4	4	16.9	16.9	16.9	33.982	0	31.856	2198600	17	28	NbD020950.1;NbD017314.1;NbD015052.1;NbD012226.1	NbD020950.1;NbD017314.1	957
18.7261	18.7266	18.2172	18.0915	18.0686	18.2489				-1	22	22	6	49.9	49.9	13.1	58.558	0	323.31	26352000	32	172	NbD017355.1	NbD017355.1	961
NaN	NaN	NaN	14.4699	14.6532	14.7395				-1	2	2	2	4.5	4.5	4.5	34.064	0	19.772	303070	19	12	NbD017641.1;NbD047529.1;NbE44069423.1	NbD017641.1;NbD047529.1;NbE44069423.1	970
18.8205	19.0115	NaN	18.5137	18.4523	18.0148				-1	3	3	1	20.1	20.1	9.5	29.204	0	54.8	4331900	8	23	NbD017696.1;NbD047786.1;NbE03059616.1	NbD017696.1;NbD047786.1;NbE03059616.1	973
20.2798	20.2098	20.3925	20.6019	20.5766	20.7092				-1	13	13	9	60	60	50.8	29.364	0	323.31	39238000	17	83	NbD019050.1;NbD017822.1	NbD019050.1;NbD017822.1	981
17.7221	17.9968	17.0118	16.8339	17.1183	NaN				-1	4	4	2	14	14	5	37.523	0	62.293	2573400	20	27	NbD017832.1;NbE44069221.1	NbD017832.1;NbE44069221.1	982
15.3632	16.1811	16.1179	15.7823	15.8357	15.4802				-1	16	8	8	65	40.4	40.4	35.864	0	67.542	2224500	19	48	NbD017866.1	NbD017866.1	985
NaN	NaN	14.7118	16.4299	NaN	16.2267				-1	5	5	2	15	15	8.3	57.603	0	55.618	1047600	30	19	NbD018033.1	NbD018033.1	992
17.8998	18.0781	17.8293	17.5715	17.6476	17.5922				-1	7	7	3	24.7	24.7	12.2	55.196	0	265.11	3782300	32	44	NbD018053.1;NbD038997.1;NbE44070960.1;NbD048874.1;NbE44070961.1	NbD018053.1;NbD038997.1;NbE44070960.1;NbD048874.1	994
17.5374	17.5464	17.3624	16.8354	16.7667	16.8036				-1	4	4	4	27.7	27.7	27.7	16.299	0	56.341	4780700	9	49	NbE05064459.1;NbD032154.1;NbD018089.1;NbE05063281.1;NbD018578.1;NbD017960.1	NbE05064459.1;NbD032154.1;NbD018089.1;NbE05063281.1;NbD018578.1;NbD017960.1	996
NaN	NaN	NaN	17.4543	17.4035	17.5366				-1	13	13	13	34.3	34.3	34.3	38.372	0	314.26	7790400	19	66	NbD018100.1;NbD032229.1	NbD018100.1	997
14.1777	14.2975	NaN	14.6796	14.5862	15.0807				-1	4	4	4	19.7	19.7	19.7	35.632	0	24.7	289880	13	15	NbD025217.1;NbD018180.1;NbE05065511.1;NbD049928.1;NbE44071178.1;NbD009769.1	NbD025217.1;NbD018180.1;NbE05065511.1;NbD049928.1;NbE44071178.1;NbD009769.1	1003
19.1478	19.183	19.0381	18.9395	19.0103	19.1133				-1	15	15	15	45.5	45.5	45.5	36.651	0	262.64	19136000	17	107	NbD018194.1	NbD018194.1	1005
17.6774	17.3455	18.0009	19.608	19.5557	19.4021				-1	15	4	4	42.4	11.4	11.4	35.92	0	126.15	12161000	17	60	NbD018307.1;NbE05065193.1	NbD018307.1;NbE05065193.1	1007
16.43	16.3891	16.048	NaN	16.2437	16.2994				-1	5	3	2	22.8	16.7	11.5	44.262	0	30.788	1877500	21	29	NbE05064302.1;NbD018370.1;NbE03058335.1	NbE05064302.1;NbD018370.1;NbE03058335.1	1009
NaN	NaN	NaN	15.5839	15.8641	15.6171				-1	3	3	3	34.6	34.6	34.6	14.79	0	28.635	818160	8	16	NbD050817.1;NbD040573.1;NbD019471.1;NbD018428.1;NbE05065820.1;NbD034970.1;NbE44073433.1;NbE03060055.1;NbD020181.1;NbD020182.1	NbD050817.1;NbD040573.1;NbD019471.1;NbD018428.1;NbE05065820.1;NbD034970.1;NbE44073433.1;NbE03060055.1;NbD020181.1	1013
19.8851	19.9026	19.7639	18.8771	19.003	19.3874				-1	5	5	5	18.9	18.9	18.9	30.413	0	77.744	11655000	14	43	NbD032924.1;NbD018463.1	NbD032924.1;NbD018463.1	1016
15.8251	16.4618	16.2952	15.8727	15.899	15.9027				-1	21	13	9	65.1	54.6	38.9	42.319	0	148.59	1985700	26	50	NbD018500.1	NbD018500.1	1017
15.2544	15.5287	15.2461	15.5383	15.3854	16.1964				-1	21	6	5	58.6	27	18.5	50.186	0	70.319	1092700	32	28	NbE03057227.1;NbD018501.1	NbE03057227.1;NbD018501.1	1018
15.2501	15.2689	15.0179	15.2173	NaN	NaN				-1	5	5	5	19.7	19.7	19.7	50.16	0	42.151	749300	22	24	NbD018589.1;NbD018446.1	NbD018589.1;NbD018446.1	1023
16.3552	16.4298	16.5738	16.068	15.9615	16.2372				-1	5	5	0	18.3	18.3	0	50.264	0	91.484	1615600	21	23	NbD031738.1;NbD018637.1;NbD025239.1;NbD023623.1	NbD031738.1;NbD018637.1;NbD025239.1;NbD023623.1	1026
16.6106	16.5591	16.4706	16.5754	16.7152	16.6276				-1	3	3	3	7.5	7.5	7.5	45.597	0	82.594	2232500	20	35	NbD018639.1;NbD031736.1	NbD018639.1	1027
17.3955	17.3813	17.1161	16.1186	16.331	16.2377				-1	8	8	8	13.3	13.3	13.3	110.58	0	85.713	2982700	42	44	NbD018648.1;NbE44072593.1;NbD026130.1;NbE44070351.1	NbD018648.1;NbE44072593.1;NbD026130.1;NbE44070351.1	1028
NaN	NaN	14.566	15.1007	14.8864	14.9344				-1	2	2	2	18.8	18.8	18.8	20.723	0	47.157	507670	7	17	NbD018720.1;NbD031627.1	NbD018720.1;NbD031627.1	1031
15.3667	15.4717	15.9088	15.7559	15.6439	15.6028				-1	8	2	2	33.2	7.9	7.9	33.507	0	32.794	747690	21	17	NbD018767.1	NbD018767.1	1034
NaN	14.7748	15.4776	16.7109	16.5761	16.1238				-1	4	4	4	10.1	10.1	10.1	79.534	0	66.739	1549800	39	29	NbD018995.1;NbE03061979.1;NbE44073332.1;NbE03059960.1	NbD018995.1;NbE03061979.1;NbE44073332.1	1041
16.6486	16.5845	16.3115	16.5208	16.5963	16.6956				-1	8	8	1	18.5	18.5	2.1	61.451	0	110.38	2369100	30	38	NbD019109.1	NbD019109.1	1046
16.3062	16.0703	16.5086	16.4359	16.411	16.5672				-1	7	7	4	27.3	27.3	16.1	50.982	0	116.59	2635500	22	51	NbD019202.1;NbD011745.1	NbD019202.1	1053
16.1066	16.1129	16.3882	17.8925	17.8363	17.824				-1	21	21	11	27.5	27.5	15.8	86.032	0	323.31	8615400	48	97	NbD019226.1	NbD019226.1	1056
NaN	NaN	16.4192	NaN	16.5398	16.8763				-1	5	5	5	10.7	10.7	10.7	61.442	0	48.671	1519000	26	22	NbD019269.1	NbD019269.1	1057
16.5216	16.2653	16.7928	16.8147	16.6782	16.8353				-1	6	6	2	38.1	38.1	18.6	24.283	0	58.059	2302800	13	36	NbD019307.1	NbD019307.1	1058
16.3909	16.4726	NaN	16.2633	16.4768	16.5718				-1	8	8	8	16.2	16.2	16.2	78.3	0	76.998	1424500	41	25	NbD019309.1;NbE05067776.1;NbD004166.1	NbD019309.1;NbE05067776.1;NbD004166.1	1059
16.48	NaN	NaN	16.6774	16.3706	16.6482				-1	4	4	2	17.7	17.7	5.8	31.982	0	61.68	1254800	17	18	NbD019343.1	NbD019343.1	1061
NaN	NaN	NaN	17.2881	17.3067	17.3219				-1	5	5	5	10.2	10.2	10.2	65.403	0	90.41	2788000	24	32	NbD044787.1;NbD019389.1;NbD031076.1;NbD000101.1;NbD000396.1	NbD044787.1;NbD019389.1;NbD031076.1;NbD000101.1	1063
NaN	16.0438	NaN	17.9439	18.2333	18.101				-1	62	5	5	68.6	9.6	9.6	107.7	0	194.54	6653900	57	35	NbD019391.1	NbD019391.1	1064
15.3302	15.4819	16.1158	15.7313	15.7188	15.4775				-1	2	1	1	12.5	7.3	7.3	31.037	0	26.554	892860	17	26	NbD019401.1;NbD021624.1;NbE03061728.1;NbD012528.1	NbD019401.1;NbD021624.1;NbE03061728.1;NbD012528.1	1067
19.7541	19.7112	20.0401	19.5856	19.7517	19.7591				-1	33	33	4	47.6	47.6	12.1	52.722	0	323.31	45027000	23	270	NbD019408.1	NbD019408.1	1068
17.1775	16.9614	18.0911	17.7878	NaN	NaN				-1	4	4	4	11.7	11.7	11.7	35.394	0	41.225	2425700	22	18	NbD035063.1;NbD019558.1	NbD035063.1;NbD019558.1	1072
NaN	NaN	NaN	17.3832	17.32	17.2678				-1	4	4	2	24.4	24.4	16.9	19.309	0	63.145	2643400	9	29	NbD040743.1;NbD048058.1;NbD042343.1;NbD019568.1;NbD040438.1	NbD040743.1;NbD048058.1;NbD042343.1;NbD019568.1;NbD040438.1	1073
NaN	NaN	15.2499	18.0968	18.0683	17.8873				-1	4	4	4	41	41	41	8.8479	0	159.15	3858400	4	27	NbE05065398.1;NbD046197.1;NbD019649.1;NbD017004.1	NbE05065398.1;NbD046197.1;NbD019649.1;NbD017004.1	1076
NaN	NaN	NaN	15.7833	16.1815	16.024				-1	5	5	1	15.1	15.1	3.4	55.001	0	38.297	792190	24	17	NbD019731.1;NbE05064266.1	NbD019731.1;NbE05064266.1	1080
15.2467	15.126	15.3206	15.1317	NaN	15.0364				-1	3	3	3	5.3	5.3	5.3	97.427	0	48.448	597670	37	23	NbD019766.1;NbE44071050.1;NbD039058.1	NbD019766.1;NbE44071050.1;NbD039058.1	1083
17.5275	17.3267	17.8025	17.6024	18.042	18.0424				-1	2	2	2	6.1	6.1	6.1	39.619	0	36.156	3532500	18	27	NbD019970.1	NbD019970.1	1087
16.2379	16.6503	16.0912	16.515	16.8646	16.9246				-1	18	18	6	25.6	25.6	10.2	104.15	0	246.13	3957200	49	69	NbD019980.1	NbD019980.1	1089
15.8311	15.9156	16.5888	15.7109	15.2119	16.0214				-1	3	3	3	27	27	27	10.889	0	74.37	708840	7	15	NbD020037.1	NbD020037.1	1090
16.5231	16.5931	16.4482	NaN	15.7337	16.0241				-1	4	4	4	6.7	6.7	6.7	113.69	0	49.139	1334800	49	24	NbD020349.1;NbD022604.1;NbE05062967.1;NbE44071345.1;NbE44071346.1;NbE03053367.1;NbE05062968.1	NbD020349.1;NbD022604.1;NbE05062967.1;NbE44071345.1;NbE44071346.1;NbE03053367.1;NbE05062968.1	1097
20.5178	20.8403	20.4307	19.7074	19.6483	19.675				-1	41	41	13	54.6	54.6	24.5	66.619	0	323.31	89489000	35	401	NbE03058635.1;NbD031028.1;NbD020434.1;NbE44071750.1;NbD021662.1;NbD016205.1;NbD011063.1;NbD011064.1	NbE03058635.1;NbD031028.1;NbD020434.1;NbE44071750.1	1099
15.8789	15.2617	15.6644	16.3471	16.6891	16.4548				-1	17	17	17	34	34	34	58.966	0	187.41	2690500	29	63	NbD020449.1;NbD007438.1	NbD020449.1;NbD007438.1	1100
16.2918	16.0157	16.6039	16.4922	16.3439	16.386				-1	6	6	6	31.8	31.8	31.8	25.152	0	75.731	1596000	10	27	NbD044523.1;NbD020515.1	NbD044523.1;NbD020515.1	1103
16.2182	16.0217	15.8455	15.7784	NaN	15.8401				-1	6	6	6	27.9	27.9	27.9	37.185	0	44.07	1288400	19	27	NbD020521.1	NbD020521.1	1104
17.2953	17.0752	16.0927	17.1159	17.5649	17.2749				-1	11	11	4	46.3	46.3	23.1	39.361	0	123.71	3065600	20	39	NbD020546.1;NbE44071421.1	NbD020546.1;NbE44071421.1	1105
NaN	NaN	NaN	15.3794	15.1504	15.1088				-1	4	4	4	19.7	19.7	19.7	36.259	0	32.43	602980	15	16	NbD020579.1;NbE03058258.1	NbD020579.1;NbE03058258.1	1107
NaN	NaN	NaN	16.7389	16.4356	16.3581				-1	8	1	1	23.1	3.3	3.3	44.424	0	42.539	643250	24	11	NbD020614.1;NbD049964.1	NbD020614.1;NbD049964.1	1108
16.4557	16.4233	16.3519	15.8287	16.0661	NaN				-1	7	7	6	15.4	15.4	15.4	53.582	0	75.618	1372400	22	23	NbD020659.1	NbD020659.1	1112
15.2949	15.1765	NaN	15.9135	16.0067	16.2377				-1	10	10	10	10.9	10.9	10.9	147.85	0	105.1	1538800	93	43	NbD020669.1;NbE05064017.1;NbD051958.1	NbD020669.1;NbE05064017.1;NbD051958.1	1114
14.3068	14.9376	15.1375	17.6219	17.4839	17.358				-1	19	19	11	26.3	26.3	13	125.66	0	306.92	5784000	66	95	NbE03055907.1;NbD020699.1	NbE03055907.1;NbD020699.1	1115
16.2876	16.4078	16.0531	NaN	16.0648	15.9362				-1	4	4	2	19.6	19.6	9.7	44.882	0	77.155	680930	23	15	NbD020769.1	NbD020769.1	1116
NaN	NaN	NaN	17.975	17.8233	17.0959				-1	4	4	3	30.3	30.3	19.1	17.239	0	42.457	2075600	7	24	NbD020850.1;NbD025259.1	NbD020850.1	1118
15.787	16.0707	15.8598	16.2954	15.8324	15.9317				-1	3	3	1	6.9	6.9	2.5	57.827	0	43.352	1178900	22	26	NbE03055324.1;NbD049576.1;NbD020855.1	NbE03055324.1;NbD049576.1;NbD020855.1	1119
15.8614	15.3053	16.372	16.8387	17.0214	16.8264				-1	3	3	3	13.5	13.5	13.5	39.692	0	35.69	1372000	18	22	NbD020879.1	NbD020879.1	1121
14.3885	14.3494	14.904	16.1362	16.0584	16.0308				-1	4	4	4	11.7	11.7	11.7	67.276	0	302.2	1213700	34	31	NbD020892.1	NbD020892.1	1122
NaN	NaN	NaN	17.1213	17.2292	16.9421				-1	3	3	3	26.4	26.4	26.4	14.812	0	26.153	742450	12	12	NbD020921.1;NbE05064881.1;NbD045575.1	NbD020921.1;NbE05064881.1;NbD045575.1	1123
16.0756	NaN	NaN	16.9561	16.7951	16.9495				-1	7	7	7	13.9	13.9	13.9	59.828	0	243.21	1833400	27	29	NbD045853.1;NbD020960.1;NbE44070163.1;NbE05064062.1	NbD045853.1;NbD020960.1;NbE44070163.1;NbE05064062.1	1128
15.9814	15.956	15.9271	16.335	16.1795	16.2011				-1	6	6	6	15.3	15.3	15.3	50.706	0	72.397	1690100	20	33	NbD029515.1;NbD021082.1	NbD029515.1;NbD021082.1	1135
17.5647	17.6771	17.525	NaN	NaN	16.5001				-1	16	1	1	50.1	5.8	5.8	42.588	0	35.178	2140200	22	14	NbD021123.1	NbD021123.1	1136
NaN	15.5029	NaN	15.2784	15.3785	15.4414				-1	6	6	1	34.5	34.5	14.7	31.495	0	89.39	1022700	18	28	NbD021143.1	NbD021143.1	1138
19.2655	19.1881	19.2812	19.3801	19.3739	19.473				-1	16	16	1	48.3	48.3	3.7	41.708	0	323.31	31228000	21	185	NbD021173.1	NbD021173.1	1140
18.6697	18.9312	18.5387	17.713	17.9847	18.1407				-1	7	7	7	41.3	41.3	41.3	27.149	0	78.125	7463700	14	56	NbD021174.1;NbD024597.1;NbD053009.1	NbD021174.1;NbD024597.1	1141
17.0711	16.9998	17.459	18.9455	18.7939	18.7124				-1	13	13	12	23.9	23.9	23.9	38.7	0	195.09	7849800	16	67	NbD021317.1;NbD041991.1	NbD021317.1	1146
NaN	NaN	NaN	17.1422	17.1231	17.0517				-1	9	9	5	46.9	46.9	22.8	25.108	0	167.2	4233200	10	61	NbD042159.1;NbD021396.1	NbD042159.1;NbD021396.1	1150
NaN	NaN	NaN	18.4276	18.2355	18.3634				-1	6	2	2	15.5	3.9	3.9	55.069	0	47.316	3399100	27	19	NbD021400.2;NbD021400.1;NbD021399.1	NbD021400.2;NbD021400.1;NbD021399.1	1151
16.0348	15.9714	16.3066	15.7543	15.8856	15.7275				-1	5	5	5	15.6	15.6	15.6	49.13	0	88.9	1357800	24	30	NbE03057844.1;NbD040584.1;NbD021432.1;NbE44071409.1;NbD008409.1	NbE03057844.1;NbD040584.1;NbD021432.1;NbE44071409.1;NbD008409.1	1153
18.3743	18.3869	18.3952	17.6221	17.7764	17.7649				-1	15	15	0	33.3	33.3	0	53.495	0	207.29	11707000	25	128	NbD021528.1;NbE03058632.1;NbD014675.1	NbD021528.1;NbE03058632.1	1158
17.3097	16.89	17.1179	17.0257	16.9817	17.4134				-1	11	11	11	26.6	26.6	26.6	61.953	0	151.47	2449100	21	45	NbE03053920.1;NbD021595.1;NbD052302.1;NbE03056971.1;NbE03056972.1	NbE03053920.1;NbD021595.1;NbD052302.1;NbE03056971.1	1160
NaN	NaN	NaN	18.6081	18.4694	18.5054				-1	5	5	5	11.8	11.8	11.8	59.043	0	39.984	1761800	30	15	NbE05065807.1;NbD048646.1;NbD021605.1	NbE05065807.1;NbD048646.1;NbD021605.1	1162
15.6754	15.5356	NaN	NaN	NaN	15.5104				-1	3	1	1	8.3	3.3	3.3	64.794	0.0014354	7.8784	618100	32	14	NbD021724.1	NbD021724.1	1167
NaN	NaN	NaN	15.0331	14.889	15.052				-1	3	3	3	8.8	8.8	8.8	50.514	0	22.049	310010	29	11	NbD021764.1;NbD038110.1;NbE44070240.1	NbD021764.1;NbD038110.1;NbE44070240.1	1172
17.0254	17.064	16.5943	16.4895	16.5547	16.7719				-1	15	15	8	15.9	15.9	7.6	135.05	0	210.22	4750600	65	89	NbD021794.1	NbD021794.1	1174
17.8006	17.8387	17.9958	18.3067	18.2578	18.3203				-1	6	2	1	23.1	12.7	5	29.356	0	45.297	6819200	16	25	NbD021873.1	NbD021873.1	1176
18.1884	18.6291	18.3266	18.8087	18.0197	18.8078				-1	6	6	1	33.1	33.1	11	19.102	0	104.28	7434600	4	69	NbD021931.1	NbD021931.1	1178
17.5097	17.5558	17.2751	16.6416	16.8981	16.9952				-1	6	6	6	28.7	28.7	28.7	31.303	0	97.35	4581700	13	42	NbD021996.1	NbD021996.1	1181
15.7239	15.7786	15.6552	15.7425	15.8572	NaN				-1	1	1	1	4.9	4.9	4.9	25.224	0	15.97	757570	10	14	NbD022120.1	NbD022120.1	1182
18.9623	19.1703	19.0117	18.7208	18.9757	19.004				-1	12	12	7	45.5	45.5	40.6	27.521	0	194.53	11441000	10	96	NbD022229.1;NbE05063168.1;NbD032309.1;NbE03062410.1	NbD022229.1;NbE05063168.1	1186
19.114	19.081	18.9425	18.7829	18.8771	18.776				-1	13	13	9	62.8	62.8	40.7	24.378	0	323.31	20439000	14	97	NbD022240.1	NbD022240.1	1188
NaN	NaN	NaN	14.889	14.9286	14.8183				-1	2	2	2	5.2	5.2	5.2	54.617	0	15.125	329710	27	11	NbD022250.1;NbD044861.1	NbD022250.1;NbD044861.1	1189
NaN	NaN	NaN	17.2283	16.7686	16.9309				-1	3	3	2	14.7	14.7	11.2	27.893	0	58.005	1028500	12	13	NbE03061744.1;NbD022267.1;NbD013111.1;NbD019191.1;NbE05067764.1;NbD047394.1;NbD004905.1	NbE03061744.1;NbD022267.1;NbD013111.1	1191
NaN	NaN	NaN	15.442	15.5606	15.564				-1	6	6	5	17.4	17.4	17.4	55.368	0	55.795	634910	28	21	NbD022309.1;NbE03061767.1;NbD018068.1;NbE44071766.1	NbD022309.1;NbE03061767.1;NbD018068.1;NbE44071766.1	1192
21.0856	21.0712	20.9711	21.1037	21.03	21.0989				-1	17	8	6	47.6	17.5	13.2	37.189	0	323.31	53082000	17	61	NbD022316.1	NbD022316.1	1193
16.4914	16.288	16.2804	17.4937	17.5081	17.5228				-1	15	4	4	21.4	8.4	8.4	83.749	0	116.38	3194000	47	37	NbD022380.1	NbD022380.1	1195
15.5321	15.5264	15.6226	15.5855	15.3403	15.5981				-1	2	2	2	1.8	1.8	1.8	149.83	0	18.275	1101400	65	23	NbE05067118.1;NbD040631.1;NbD022407.1	NbE05067118.1;NbD040631.1;NbD022407.1	1196
16.9488	16.6517	16.3239	16.5392	16.8365	16.9789				-1	4	4	4	15.2	15.2	15.2	48.454	0	94.53	2106600	26	27	NbD034213.1;NbD022448.1;NbE05066899.1;NbD052132.1	NbD034213.1;NbD022448.1;NbE05066899.1	1198
NaN	NaN	NaN	16.9622	16.9281	16.8281				-1	9	9	9	53.5	53.5	53.5	16.238	0	64.156	2224900	8	29	NbD022585.1;NbD014268.1;NbD029831.1;NbD007551.1;NbE44070061.1;NbD011520.1;NbD022584.1;NbE03054593.1	NbD022585.1;NbD014268.1;NbD029831.1;NbD007551.1;NbE44070061.1;NbD011520.1	1204
15.3509	15.3355	15.9856	18.8468	18.8721	18.749				-1	27	27	0	55.5	55.5	0	61.213	0	323.31	15219000	42	136	NbD022620.1	NbD022620.1	1206
16.4701	16.4679	16.6253	16.256	16.398	16.493				-1	5	5	5	17.5	17.5	17.5	39.534	0	55.09	2075300	20	31	NbD022660.1	NbD022660.1	1208
17.2576	17.1874	17.6561	17.5501	17.5056	17.4358				-1	5	5	5	60	60	60	12.842	0	95.208	3345700	8	45	NbD022750.1;NbE03062179.1;NbE03061630.1	NbD022750.1;NbE03062179.1;NbE03061630.1	1210
14.5066	14.3643	14.1566	NaN	14.3368	NaN				-1	2	2	2	9	9	9	50.39	0	17.424	351440	29	15	NbD022809.1;NbE05067099.1	NbD022809.1;NbE05067099.1	1214
15.2923	15.0735	15.2353	NaN	15.1786	14.8638				-1	6	4	4	17.2	12	12	61.29	0	37.125	837450	34	31	NbD022859.1	NbD022859.1	1216
NaN	12.7143	NaN	14.4019	14.3103	14.1971				-1	3	3	1	8.3	8.3	2.5	47.901	0	25.219	300170	20	17	NbD022982.1	NbD022982.1	1220
16.0026	16.0361	16.1487	15.9614	15.9491	15.8589				-1	5	5	4	17.4	17.4	17.4	40.121	0	76.487	1382600	13	33	NbE05065788.1;NbE44073368.1;NbD022994.1	NbE05065788.1;NbE44073368.1;NbD022994.1	1221
NaN	NaN	NaN	13.9175	14.1267	13.8525				-1	2	2	2	18.1	18.1	18.1	14.301	0	54.778	98974	8	9	NbD023007.1	NbD023007.1	1222
NaN	NaN	16.5949	16.6158	NaN	16.5035				-1	3	2	2	43.8	26.4	26.4	12.966	0	21.182	807890	6	13	NbD023250.1;NbE03056665.1	NbD023250.1;NbE03056665.1	1229
17.3656	17.3667	17.4966	17.225	17.2516	17.3485				-1	6	6	3	18.7	18.7	6.9	40.715	0	46.938	2560200	20	27	NbD023260.1;NbE03055596.1	NbD023260.1;NbE03055596.1	1231
15.5976	15.6428	15.8715	16.1726	16.2046	16.1167				-1	5	5	1	39.9	39.9	9.9	22.395	0	71.793	1478200	14	33	NbD023353.1;NbE05065239.1	NbD023353.1;NbE05065239.1	1233
17.7956	17.8644	17.7711	16.2659	16.9168	NaN				-1	4	4	4	15.2	15.2	15.2	49.709	0	50.584	2245700	25	30	NbD023408.1;NbE44071954.1	NbD023408.1;NbE44071954.1	1235
NaN	NaN	NaN	15.5261	15.5187	15.5685				-1	2	2	2	14.1	14.1	14.1	34.359	0	24.176	607190	17	15	NbD023423.1	NbD023423.1	1237
17.3863	17.6411	17.6739	18.0424	17.9206	17.9621				-1	4	4	4	48.3	48.3	48.3	13.617	0	122.24	4803400	7	43	NbD040431.1;NbD023489.1;NbD048505.1;NbD046679.1;NbD013775.1	NbD040431.1;NbD023489.1	1238
NaN	NaN	NaN	14.8443	14.7011	14.7245				-1	3	3	2	4.3	4.3	2.3	91.193	0	32.162	506010	44	14	NbD023502.1	NbD023502.1	1239
16.9022	16.9394	17.1735	17.6065	17.2914	17.18				-1	8	8	4	24.3	24.3	9.9	43.867	0	129.51	4810600	22	52	NbD023596.1	NbD023596.1	1243
16.122	16.3669	16.4545	16.3345	16.5786	16.4024				-1	6	6	6	65	65	65	10.981	0	124.76	2194000	5	34	NbD024925.1;NbD023613.1	NbD024925.1;NbD023613.1	1246
NaN	NaN	NaN	16.9815	16.8882	16.7636				-1	17	2	2	47.8	11.7	11.7	35.91	0	25.427	1028100	21	13	NbD023842.1	NbD023842.1	1253
16.9491	17.1129	17.2114	17.9378	17.5984	17.9388				-1	8	8	2	28.6	28.6	5.9	45.598	0	75.078	4424500	18	56	NbD023862.1;NbE03059467.1;NbE44074440.1	NbD023862.1;NbE03059467.1;NbE44074440.1	1254
NaN	NaN	NaN	15.0582	15.2938	15.2586				-1	4	4	4	13.1	13.1	13.1	70.855	0	38.902	473910	25	16	NbE44069792.1;NbE44069791.1;NbD023878.1;NbD016350.1	NbE44069792.1;NbE44069791.1;NbD023878.1;NbD016350.1	1255
15.4626	15.6047	NaN	16.9125	16.9523	16.8402				-1	7	7	7	19.9	19.9	19.9	43.466	0	108.9	1920800	24	39	NbD050073.1;NbD023889.1	NbD050073.1;NbD023889.1	1256
16.6342	16.5635	16.0632	15.3208	15.5463	15.5435				-1	19	1	1	33	5.1	5.1	73.217	0	49.118	1180400	37	18	NbD023909.1	NbD023909.1	1258
13.4955	12.9666	NaN	18.3921	18.1891	18.4122				-1	22	22	12	37.8	37.8	24.6	79.55	0	323.31	13249000	40	138	NbD023974.1	NbD023974.1	1261
NaN	NaN	NaN	15.3093	15.6038	15.5253				-1	3	3	3	4.1	4.1	4.1	182.99	0	36.719	831340	73	18	NbD023977.1;NbE03053520.1	NbD023977.1;NbE03053520.1	1262
15.3959	14.986	16.2141	16.6562	15.6037	15.3019				-1	34	4	4	60.6	10.5	10.5	63.31	0	64.377	1108700	35	27	NbD023987.1	NbD023987.1	1263
17.9024	17.8117	17.8416	18.0865	18.1685	18.0553				-1	16	4	1	48.3	13.5	4.2	41.757	0	55.405	3823800	21	25	NbD052248.1;NbD024063.1;NbD015393.1;NbD044964.1	NbD052248.1;NbD024063.1;NbD015393.1	1265
14.7817	NaN	NaN	NaN	16.9359	16.4252				-1	2	1	1	15.1	10.1	10.1	20.498	0	14.484	887210	10	14	NbD024195.1;NbD048979.1;NbD038334.1	NbD024195.1;NbD048979.1;NbD038334.1	1269
17.3652	NaN	17.6258	18.3367	18.24	18.2779				-1	2	2	2	7.5	7.5	7.5	25.967	0	192.73	3503500	10	16	NbD024308.1	NbD024308.1	1274
16.2168	16.5891	15.9282	15.7676	15.7742	16.0024				-1	7	7	7	36.4	36.4	36.4	35.386	0	82.832	2230800	17	45	NbD024340.1;NbD024339.1;NbD000290.1;NbD022216.1;NbD007319.1;NbD029346.1	NbD024340.1;NbD024339.1;NbD000290.1	1276
15.8644	15.2385	15.882	17.392	17.7994	17.6555				-1	14	14	3	52.6	52.6	16.3	36.579	0	323.31	10376000	17	96	NbD024468.1	NbD024468.1	1281
NaN	NaN	NaN	15.3407	15.5515	15.5116				-1	5	5	5	16.7	16.7	16.7	47.477	0	53.255	558150	24	17	NbD024519.1;NbE05066552.1;NbE44069253.1;NbE05068112.1;NbD051729.1	NbD024519.1;NbE05066552.1;NbE44069253.1;NbE05068112.1;NbD051729.1	1282
NaN	NaN	NaN	16.5046	16.412	16.4039				-1	6	6	3	16.7	16.7	8.7	46.509	0	75.008	1605600	16	33	NbD024559.1	NbD024559.1	1284
NaN	NaN	NaN	15.6573	15.7908	15.485				-1	7	4	4	12.8	8.6	8.6	76.265	0	110	678530	25	19	NbE05067310.1;NbD024731.1	NbE05067310.1;NbD024731.1	1286
16.8651	16.9246	16.7235	16.2292	16.4218	NaN				-1	7	3	2	28.2	14.6	9.5	42.624	0	33.501	1848700	22	26	NbD024768.1;NbD030018.1;NbE03061739.1	NbD024768.1;NbD030018.1;NbE03061739.1	1290
16.3601	16.5342	16.1515	16.0517	16.2043	16.3237				-1	14	8	7	30	24	21.7	70.102	0	98.077	2558100	36	70	NbD024818.1;NbE44073109.1;NbE05067442.1;NbD044294.1	NbD024818.1;NbE44073109.1;NbE05067442.1	1292
14.9531	14.9003	14.8503	14.8877	NaN	NaN				-1	3	3	3	15.1	15.1	15.1	35.218	0	45.284	513360	18	19	NbD024824.1	NbD024824.1	1293
NaN	NaN	NaN	15.6767	15.822	15.7599				-1	2	2	2	5.4	5.4	5.4	57.811	0	34.288	735950	33	13	NbE03056038.1;NbD024834.1	NbE03056038.1;NbD024834.1	1295
NaN	NaN	NaN	15.1257	15.3086	15.3585				-1	2	2	2	10.1	10.1	10.1	38.117	0	33.388	554540	19	15	NbD024919.1;NbD046098.1	NbD024919.1;NbD046098.1	1298
20.7806	20.8647	20.8448	20.2069	20.3754	20.3278				-1	13	13	0	27.5	27.5	0	41.865	0	323.31	35360000	20	198	NbD046880.1;NbD024969.1	NbD046880.1;NbD024969.1	1303
17.6776	18.1519	17.6045	16.7748	16.8794	NaN				-1	8	8	8	28.6	28.6	28.6	42.693	0	154.55	2484100	26	29	NbE44074169.1;NbD038978.1;NbD025005.1;NbE03059725.1	NbE44074169.1;NbD038978.1;NbD025005.1	1305
NaN	NaN	NaN	15.32	15.0524	15.1049				-1	10	4	4	31.3	18	18	32.269	0	47.192	517680	20	16	NbE03060139.1;NbD025104.1	NbE03060139.1;NbD025104.1	1311
15.8917	15.965	15.8402	16.4167	16.4403	16.0527				-1	9	9	2	29.9	29.9	6.1	29.536	0	83.221	3397000	14	64	NbD025143.1;NbD021002.1	NbD025143.1	1312
18.6409	18.7593	18.6726	18.7627	18.8411	18.9356				-1	39	39	22	37.7	37.7	26.9	110.03	0	323.31	39745000	60	251	NbD025146.1;NbE44072113.1	NbD025146.1;NbE44072113.1	1313
NaN	15.6442	15.5876	15.6853	15.9393	15.7918				-1	29	4	4	32.4	4.7	4.7	84.581	0	35.437	961230	40	24	NbD025161.1	NbD025161.1	1315
16.1317	16.282	16.1504	16.2388	16.2685	16.3081				-1	7	7	1	9.2	9.2	2.4	157.43	0	174.69	1767100	62	32	NbE03053363.1;NbD025242.1;NbD038692.1	NbE03053363.1;NbD025242.1;NbD038692.1	1318
NaN	NaN	18.1059	17.4458	17.3826	17.3734				-1	2	2	1	12.4	12.4	9.3	24.093	0	13.916	2359400	6	18	NbD025243.1	NbD025243.1	1319
16.5791	16.4702	16.4955	16.391	15.9567	NaN				-1	11	11	11	21	21	21	69.391	0	100.79	1896500	27	31	NbD049811.1;NbD025385.1;NbE03055016.1	NbD049811.1;NbD025385.1;NbE03055016.1	1324
NaN	NaN	NaN	15.9522	15.5258	15.2559				-1	7	7	2	12.7	12.7	4.2	69.053	0	43.543	789820	37	21	NbE03056528.1;NbD025452.1	NbE03056528.1;NbD025452.1	1327
NaN	NaN	NaN	16.2734	16.1851	16.1988				-1	17	10	10	21.5	15	15	142.47	0	193.13	2703900	62	60	NbE05068254.1;NbD025457.1	NbE05068254.1;NbD025457.1	1328
NaN	NaN	NaN	16.1454	16.8599	17.0637				-1	5	5	5	14.4	14.4	14.4	55.254	0	78.287	1780100	26	18	NbD025461.1;NbD013547.1	NbD025461.1;NbD013547.1	1329
NaN	NaN	NaN	18.0464	18.0058	17.8548				-1	8	2	2	34.4	13.7	13.7	24.792	0	35.689	2135600	7	19	NbD025469.1;NbD024722.1;NbD023955.1;NbD011424.1;NbD041917.1;NbE03058825.1;NbE05065416.1	NbD025469.1;NbD024722.1;NbD023955.1;NbD011424.1;NbD041917.1;NbE03058825.1	1330
19.7562	19.8674	19.7049	19.5878	19.5959	19.5983				-1	19	19	19	98.1	98.1	98.1	17.496	0	323.31	54924000	7	262	NbD025509.1;NbD000112.1	NbD025509.1	1332
17.3157	17.3554	17.3843	16.4462	16.3873	15.9133				-1	4	4	4	30.7	30.7	30.7	17.665	0	126.38	1774800	10	23	NbE03058465.1;NbD052042.1;NbD025608.1	NbE03058465.1;NbD052042.1;NbD025608.1	1339
16.3096	16.4029	16.5495	17.5392	17.3775	17.3886				-1	17	17	8	23.1	23.1	9.1	94.906	0	323.31	6219800	53	80	NbE44069004.1;NbD025668.1	NbE44069004.1;NbD025668.1	1341
16.2826	16.3249	16.1305	15.916	16.1006	16.0875				-1	3	3	2	15.6	15.6	9.9	39.347	0	25.759	1451900	16	23	NbD025686.1;NbD024830.1;NbD029919.1;NbE05067563.1;NbD006083.1	NbD025686.1;NbD024830.1;NbD029919.1;NbE05067563.1;NbD006083.1	1342
NaN	NaN	NaN	15.7486	15.564	15.643				-1	11	3	3	15.8	7	7	93.018	0	56.175	758850	39	21	NbD025748.1;NbE03058586.1	NbD025748.1;NbE03058586.1	1345
16.8487	17.0845	16.8294	16.6964	16.7802	16.886				-1	4	4	4	11.7	11.7	11.7	47.028	0	44.059	2585300	19	30	NbD025765.1;NbD034359.1	NbD025765.1;NbD034359.1	1347
NaN	NaN	NaN	15.9149	15.9626	16.1637				-1	2	2	2	10.4	10.4	10.4	34.783	0	17.519	1063900	16	13	NbD025793.1;NbD052698.1	NbD025793.1;NbD052698.1	1350
NaN	NaN	NaN	15.642	15.72	15.7615				-1	4	4	2	9.3	9.3	3.6	60.686	0	40.196	636800	32	18	NbD025909.1	NbD025909.1	1355
NaN	NaN	NaN	16.4059	16.3245	16.3966				-1	15	5	4	23.7	10.2	8.9	84.923	0	42.197	1657900	48	23	NbE03055346.1;NbD025915.1	NbE03055346.1;NbD025915.1	1356
NaN	NaN	16.5319	16.2014	16.3276	NaN				-1	4	3	3	7.9	5.5	5.5	59.875	0	27.595	1288600	27	16	NbD026080.1	NbD026080.1	1364
16.2683	16.423	16.2756	15.9611	16.0993	16.2138				-1	6	6	6	21.2	21.2	21.2	43.005	0	63.583	2185900	23	34	NbD044725.1;NbD026141.1	NbD044725.1;NbD026141.1	1366
NaN	NaN	NaN	16.8874	16.8281	16.7149				-1	5	5	5	13.3	13.3	13.3	70.384	0	44.478	825970	27	12	NbE03057820.1;NbD026192.1;NbE44072642.1;NbD031698.1	NbE03057820.1;NbD026192.1;NbE44072642.1;NbD031698.1	1367
18.0355	17.9358	17.8187	17.168	17.2612	17.2377				-1	22	18	4	72.1	63.8	14.5	42.482	0	323.31	14919000	26	169	NbD026241.1	NbD026241.1	1368
NaN	NaN	NaN	16.0112	15.8576	16.1548				-1	6	1	1	22.3	3.1	3.1	43.263	0	22.494	585900	26	14	NbD026305.1	NbD026305.1	1370
15.15	15.1818	NaN	NaN	15.1217	15.1949				-1	2	2	2	9.2	9.2	9.2	29.646	0	36.716	583280	16	15	NbE44069021.1;NbD026383.1	NbE44069021.1;NbD026383.1	1373
NaN	NaN	NaN	14.725	14.5885	14.5001				-1	4	3	3	18.1	15.1	15.1	39.817	0	19.786	385110	16	15	NbE05063437.1;NbD026434.1	NbE05063437.1;NbD026434.1	1375
17.3071	17.2563	17.4648	16.5788	16.7491	16.5211				-1	7	7	3	14.9	14.9	7.3	80.874	0	73.415	2985100	35	36	NbD026610.1;NbE03060967.1;NbD007921.1	NbD026610.1;NbE03060967.1;NbD007921.1	1381
NaN	NaN	NaN	15.8606	16.3346	16.0048				-1	10	7	2	9.2	7.8	3.3	209.03	0	54.215	1323600	92	31	NbD026839.1;NbE05063410.1;NbE03056560.1	NbD026839.1;NbE05063410.1;NbE03056560.1	1389
14.9936	14.9853	14.7421	NaN	NaN	NaN				-1	3	3	3	22.5	22.5	22.5	28.007	0	22.569	542230	11	16	NbD026977.1	NbD026977.1	1397
16.3171	16.8022	16.0476	17.1437	17.0074	17.204				-1	8	8	7	13.8	13.8	11.6	75.032	0	192.25	3286300	31	46	NbE05064923.1;NbD026995.1	NbE05064923.1;NbD026995.1	1400
NaN	14.4996	NaN	15.3412	14.9862	15.0933				-1	8	6	6	12.5	9.8	9.8	105.24	0	70.775	922910	46	26	NbD039302.1;NbD026998.1;NbD005222.1;NbD048664.1;NbE44073973.1;NbD046056.1	NbD039302.1;NbD026998.1	1401
18.4717	17.9507	18.0205	18.7338	18.5259	18.7086				-1	6	6	6	12.9	12.9	12.9	62.357	0	105.84	6614700	32	49	NbD027186.1	NbD027186.1	1409
NaN	NaN	NaN	15.7496	15.9233	15.8306				-1	3	3	3	12.1	12.1	12.1	46.197	0	57.971	876070	18	14	NbD027300.1	NbD027300.1	1413
17.0537	16.5911	NaN	NaN	16.5379	16.4473				-1	4	4	4	24.7	24.7	24.7	17.757	0	65.134	1818200	10	21	NbD049164.1;NbD027400.1	NbD049164.1;NbD027400.1	1415
15.8329	16.0928	16.0309	NaN	15.2177	NaN				-1	13	1	1	44	9.2	9.2	37.631	0	22.882	602400	19	15	NbD027434.1	NbD027434.1	1416
NaN	14.729	NaN	15.9291	15.8229	15.5667				-1	3	3	3	7.3	7.3	7.3	77.845	0	69.669	603590	44	17	NbE44073333.1;NbD027473.1;NbD004865.1	NbE44073333.1;NbD027473.1;NbD004865.1	1417
16.1743	16.6936	16.3453	16.0448	15.9033	16.2615				-1	7	7	7	19	19	19	58.438	0	69.305	2183000	30	42	NbD037886.1;NbD027492.1	NbD037886.1;NbD027492.1	1419
16.9417	16.5933	17.0414	17.2432	17.2741	17.3076				-1	6	6	3	17.6	17.6	17	17.363	0	323.31	6526000	11	64	NbD027499.1;NbD042543.1;NbE05062791.1	NbD027499.1;NbD042543.1	1420
15.5471	15.1601	15.5753	15.9392	15.1057	15.3148				-1	4	4	4	16.4	16.4	16.4	36.479	0	100.07	1112300	17	25	NbD027529.1;NbD044680.1	NbD027529.1;NbD044680.1	1421
17.8538	17.3803	17.5767	16.9875	17.2185	17.3596				-1	9	7	7	26	23.3	23.3	45.474	0	129.01	2585400	22	38	NbD027578.1;NbD030046.1;NbE03054884.1	NbD027578.1;NbD030046.1;NbE03054884.1	1425
15.9966	15.8148	NaN	NaN	15.0868	NaN				-1	2	2	2	13.9	13.9	13.9	24.638	0	15.424	489120	12	12	NbD027581.1;NbE05066442.1	NbD027581.1;NbE05066442.1	1426
18.8986	18.9961	18.7229	19.008	19.1583	19.1582				-1	5	5	5	23.8	23.8	23.8	24.747	0	161.76	15832000	11	62	NbE03060296.1;NbD027601.1;NbD017118.1;NbD031658.1;NbE03061927.1;NbD006929.1;NbD006930.1;NbD005585.1	NbE03060296.1;NbD027601.1;NbD017118.1;NbD031658.1;NbE03061927.1;NbD006929.1	1427
18.401	18.4865	18.3284	17.8985	18.1707	18.2034				-1	20	20	8	52.2	52.2	23.7	52.664	0	323.31	14799000	27	120	NbD027633.1;NbD026020.1	NbD027633.1;NbD026020.1	1429
15.4634	15.4611	15.4495	15.8939	15.8995	15.9478				-1	10	3	3	16.5	7.5	7.5	97.86	0	32.892	850040	48	19	NbD027713.1;NbD027713.2	NbD027713.1	1433
NaN	NaN	NaN	16.4016	16.2924	16.2738				-1	7	6	6	8.6	7.8	7.8	173.41	0	117.27	1190700	79	25	NbD027867.1;NbE03058222.1;NbD031858.1;NbE03056429.1	NbD027867.1;NbE03058222.1;NbD031858.1	1439
17.0932	17.2142	16.8103	15.5892	NaN	16.0363				-1	3	3	3	28.6	28.6	28.6	20.122	0	60.45	1847800	11	28	NbD031860.1;NbD027868.1;NbE03059519.1;NbD031861.1	NbD031860.1;NbD027868.1;NbE03059519.1;NbD031861.1	1440
NaN	16.5394	16.421	16.6014	16.5811	16.57				-1	3	3	3	14	14	14	25.71	0	21.794	1273300	10	18	NbD028041.1	NbD028041.1	1443
17.1938	17.1844	17.0707	NaN	NaN	NaN				-1	5	3	2	37.4	26.9	19.6	25.682	0	44.044	1490800	15	22	NbD028043.1	NbD028043.1	1445
NaN	15.8233	16.1306	15.3467	15.0878	15.1956				-1	10	2	2	32.1	4.3	4.3	40.61	0	19.408	723200	24	17	NbD028046.1	NbD028046.1	1446
16.0382	15.654	15.8266	15.8665	15.837	15.6719				-1	10	10	9	60.7	60.7	57.7	19.793	0	100.97	1468300	10	39	NbD028091.1;NbD029998.1;NbE03059269.1;NbD030440.1;NbD014387.1	NbD028091.1;NbD029998.1;NbE03059269.1;NbD030440.1;NbD014387.1	1449
15.9726	15.7481	16.2876	NaN	16.0121	15.793				-1	6	6	6	12.4	12.4	12.4	91.009	0	49.046	1325100	42	30	NbD028114.1;NbD020789.1;NbE05068644.1;NbE03058836.1;NbD033661.1;NbD021021.1	NbD028114.1;NbD020789.1	1450
18.557	18.4042	18.5549	18.4253	18.3992	18.4735				-1	25	25	2	51.2	51.2	6.9	68.665	0	323.31	25642000	38	181	NbD028153.1;NbD022051.1;NbE44070587.1;NbD032921.1	NbD028153.1;NbD022051.1	1451
20.0522	21.2615	20.3946	19.1406	19.3953	19.4783				-1	5	1	0	39.4	7.8	0	20.361	0	26.658	14785000	12	20	NbD028157.1	NbD028157.1	1452
17.5664	17.7669	17.4808	16.6108	17.1291	17.1377				-1	4	4	4	71.1	71.1	71.1	12.365	0	147.68	3662100	8	47	NbD028243.1	NbD028243.1	1455
NaN	NaN	NaN	16.2957	16.2622	16.2016				-1	9	9	4	28.6	28.6	13	39.711	0	65.998	1513100	24	34	NbD028335.1	NbD028335.1	1461
16.5005	16.3981	16.8596	16.8371	16.9547	16.709				-1	3	3	3	37.4	37.4	37.4	15.25	0	28.609	1763700	9	25	NbD028345.1	NbD028345.1	1462
15.6454	15.7021	15.5327	NaN	15.1537	15.2771				-1	5	3	2	19.6	11	5.7	46.687	0	43.843	764420	19	18	NbD028389.1	NbD028389.1	1467
NaN	NaN	NaN	17.67	17.4623	17.6702				-1	9	9	2	40	40	13.3	23.339	0	85.864	3233900	12	34	NbD028502.1;NbD049173.1;NbD006402.1;NbD000786.1;NbD011065.1	NbD028502.1;NbD049173.1;NbD006402.1;NbD000786.1	1470
16.283	16.2747	16.512	16.5619	16.6542	16.4156				-1	4	4	4	9.3	9.3	9.3	58.466	0	59.492	1332300	27	21	NbD028560.1;NbD006807.1	NbD028560.1	1473
NaN	NaN	NaN	17.0751	17.2287	17.2728				-1	5	5	3	29.5	29.5	18.9	13.628	0	45.023	1622300	7	20	NbD029200.1;NbD028565.1	NbD029200.1;NbD028565.1	1474
17.0601	17.0687	17.0268	16.4139	16.5014	16.5849				-1	8	8	6	64.4	64.4	61.5	16.584	0	113.97	2551800	11	38	NbD028672.1;NbE44069748.1;NbE03060915.1;NbD019851.1;NbE05068508.1	NbD028672.1;NbE44069748.1;NbE03060915.1;NbD019851.1;NbE05068508.1	1478
15.8132	15.7019	15.9947	15.9874	15.7501	15.8723				-1	4	4	3	9.4	9.4	8	61.907	0	39.612	1110000	31	22	NbD028706.1	NbD028706.1	1480
17.4364	17.4226	17.2136	16.684	16.3035	16.4806				-1	7	7	2	11.1	11.1	4.5	87.605	0	77.053	2572200	39	45	NbE44072412.1;NbD028722.1;NbE03060801.1;NbD038080.1;NbD007011.1	NbE44072412.1;NbD028722.1;NbE03060801.1;NbD038080.1	1481
NaN	NaN	NaN	15.7863	15.968	15.9764				-1	2	2	2	4.8	4.8	4.8	68.228	0	16.068	572040	40	11	NbD042866.1;NbD028787.1;NbE44072235.1;NbD008205.1	NbD042866.1;NbD028787.1;NbE44072235.1;NbD008205.1	1482
15.7711	15.4225	15.691	17.2339	16.6611	17.2431				-1	5	5	5	4	4	4	236.38	0	124.23	2108400	119	33	NbD029079.1	NbD029079.1	1493
NaN	NaN	16.2178	16.3851	16.1297	NaN				-1	2	2	2	11.6	11.6	11.6	31.902	0	13.065	900870	17	12	NbD029086.1;NbE44072731.1	NbD029086.1;NbE44072731.1	1495
NaN	NaN	NaN	15.2885	15.3788	15.2405				-1	10	4	2	32.9	11.6	7.3	34.54	0	114.31	1158500	11	29	NbD029126.1;NbE03060847.1;NbE44070740.1	NbD029126.1;NbE03060847.1;NbE44070740.1	1498
14.902	15.0991	15.1086	15.3034	15.2132	15.2641				-1	5	5	1	8.6	8.6	1.5	129	0	43.764	877080	56	25	NbD029137.1;NbE03057144.1	NbD029137.1;NbE03057144.1	1499
17.6473	17.5897	17.0506	NaN	NaN	15.1502				-1	15	7	5	24.3	11.2	6.4	93.674	0	92.227	1680700	42	24	NbD029169.1	NbD029169.1	1500
14.9252	14.7007	15.1053	16.0316	15.9683	16.0848				-1	3	3	3	8.4	8.4	8.4	103.29	0	35.596	951700	43	18	NbE05063989.1;NbD029170.1;NbE44074610.1	NbE05063989.1;NbD029170.1;NbE44074610.1	1501
NaN	NaN	NaN	21.0243	21.1166	21.1394				-1	5	5	5	36.8	36.8	36.8	17.523	0	94.943	19459000	8	26	NbD029299.1;NbE05063025.1;NbD010804.1;NbD010758.1;NbD022905.1;NbE05066957.1;NbD044351.1;NbD026178.1	NbD029299.1;NbE05063025.1;NbD010804.1;NbD010758.1;NbD022905.1;NbE05066957.1;NbD044351.1;NbD026178.1	1511
NaN	NaN	17.9252	16.4833	16.8256	16.9362				-1	20	2	2	41.8	3.6	3.6	55.41	0	50.461	2507200	21	16	NbD029578.1;NbE05067733.1	NbD029578.1;NbE05067733.1	1517
14.78	14.6884	14.5037	14.8416	14.7584	15.1522				-1	6	6	1	14.4	14.4	3.6	57.012	0	43.066	941420	30	33	NbD029704.1;NbE03057853.1;NbD041214.1	NbD029704.1;NbE03057853.1	1528
16.6206	16.701	NaN	15.6677	15.7581	NaN				-1	4	4	4	21.4	21.4	21.4	32.127	0	25.331	921120	17	16	NbD029721.1	NbD029721.1	1529
16.4291	NaN	16.5304	NaN	15.873	NaN				-1	16	6	5	29.2	11	9.1	70.145	0	58.503	869330	34	17	NbD029746.1	NbD029746.1	1531
15.4746	15.4984	15.717	16.2611	16.1288	16.2428				-1	3	3	3	8.4	8.4	8.4	58.224	0	22.762	955710	29	16	NbD029921.1	NbD029921.1	1537
20.0867	19.9193	20.3864	20.1993	20.3752	20.4938				-1	15	9	6	60.8	35.4	23.1	13.452	0	323.31	37105000	8	69	NbD044082.1;NbD030113.1	NbD044082.1;NbD030113.1	1540
14.3753	14.4567	14.0636	NaN	NaN	NaN				-1	4	4	4	23	23	23	29.341	0	35.626	378670	18	15	NbD030156.2;NbE05066281.1;NbD030156.1;NbE03059082.1;NbD025138.1	NbD030156.2;NbE05066281.1;NbD030156.1;NbE03059082.1;NbD025138.1	1542
NaN	NaN	NaN	15.4152	15.2937	15.1545				-1	8	2	2	57.9	17.1	17.1	24.096	0	21.83	434990	11	18	NbD030175.1;NbD028623.1	NbD030175.1	1544
17.2425	16.7338	16.7834	17.52	17.7881	17.6918				-1	22	22	7	23.7	23.7	8.1	143.93	0	323.31	6728900	69	101	NbD030308.1;NbE05067208.1	NbD030308.1;NbE05067208.1	1549
15.7884	15.5973	15.8495	NaN	NaN	15.233				-1	2	2	2	7.7	7.7	7.7	47.029	0	17.827	549760	21	16	NbE05067728.1;NbD030387.1;NbE03056475.1;NbD049896.1	NbE05067728.1;NbD030387.1;NbE03056475.1;NbD049896.1	1551
18.5469	18.6345	18.6317	18.6267	18.6164	18.6572				-1	12	12	12	40.8	40.8	40.8	41.296	0	238.17	15266000	22	102	NbD030400.1;NbD033288.1;NbE03054978.1	NbD030400.1	1552
16.6306	16.7512	16.5415	15.9424	16.2091	16.3323				-1	7	4	3	25.8	17.2	10.3	46.562	0	245.8	3017100	19	48	NbE03054971.1;NbD030453.1	NbE03054971.1;NbD030453.1	1553
15.7917	15.5783	15.7595	15.6048	15.1113	15.3829				-1	7	7	7	16.6	16.6	16.6	86.043	0	84.055	1073600	41	28	NbE03059857.1;NbD044251.1;NbD030619.1	NbE03059857.1;NbD044251.1;NbD030619.1	1562
15.9092	16.5372	NaN	16.1265	16.2008	16.2588				-1	4	4	4	16.7	16.7	16.7	37.078	0	55.93	1767600	15	30	NbE05063558.1;NbD030755.1;NbD031414.1	NbE05063558.1;NbD030755.1;NbD031414.1	1564
NaN	NaN	NaN	17.1138	17.0841	17.0432				-1	23	9	9	20.5	11	11	193.07	0	231.76	2763900	86	39	NbE03060074.1;NbD030848.1	NbE03060074.1;NbD030848.1	1567
17.5673	NaN	18.1845	18.6339	18.7007	18.7118				-1	3	3	2	14.9	14.9	5.6	28.687	0	45.157	3872600	12	19	NbD030870.1	NbD030870.1	1568
19.4274	19.6254	19.2877	18.98	18.7562	18.5641				-1	40	11	4	45.6	16.5	2.6	80.18	0	243.74	11691000	34	109	NbD030896.1	NbD030896.1	1570
16.6682	16.3166	16.0709	16.8876	16.7852	16.8258				-1	7	7	2	21.6	21.6	5.3	44.56	0	72.662	1922000	23	31	NbE03060148.1;NbD041326.1;NbD030921.1;NbD051888.1	NbE03060148.1;NbD041326.1;NbD030921.1;NbD051888.1	1572
NaN	NaN	NaN	16.817	16.6742	16.6565				-1	25	6	0	44.6	14.1	0	70.529	0	74.783	2544600	46	41	NbD030932.1	NbD030932.1	1573
15.0408	15.274	NaN	16.6068	16.5897	16.1624				-1	3	3	3	9.7	9.7	9.7	58.566	0	55.693	1570300	23	24	NbD049707.1;NbE05065391.1;NbD030942.1	NbD049707.1;NbE05065391.1;NbD030942.1	1574
16.6334	16.6203	16.6582	16.8925	16.5285	16.245				-1	7	7	3	66.1	66.1	23.2	12.484	0	63.606	2170700	8	32	NbD030965.1;NbE03061709.1;NbE03062199.1;NbE44070162.1;NbD045854.1;NbD020959.1	NbD030965.1;NbE03061709.1	1576
NaN	16.1931	16.4653	17.2687	16.7699	17.1549				-1	3	3	3	8.9	8.9	8.9	38.781	0	24.633	1328100	14	17	NbE05068650.1;NbD031114.1	NbE05068650.1;NbD031114.1	1582
16.6774	NaN	16.7219	16.946	NaN	16.9593				-1	3	3	3	26.7	26.7	26.7	22.98	0	63.542	1831200	10	15	NbD031170.1;NbD024331.1	NbD031170.1;NbD024331.1	1583
17.0817	16.9435	17.5955	16.836	16.8959	16.8235				-1	14	13	12	30.3	28.1	27.5	55.225	0	190.6	4644500	29	62	NbD031353.1;NbD037953.1;NbD007099.1	NbD031353.1;NbD037953.1	1586
19.067	18.9981	19.303	19.2526	19.185	19.0154				-1	15	15	15	43.5	43.5	43.5	59.81	0	295.04	20564000	30	164	NbD031394.1;NbD027714.1;NbE03056541.1;NbD048341.1;NbD011647.1;NbD020817.1	NbD031394.1;NbD027714.1;NbE03056541.1;NbD048341.1;NbD011647.1;NbD020817.1	1587
15.8233	15.8628	15.3825	15.714	15.8545	15.9936				-1	12	12	5	19.2	19.2	10.3	97.953	0	159.47	3092100	49	60	NbE03054774.1;NbD031396.1	NbE03054774.1;NbD031396.1	1588
16.217	16.3399	16.1128	17.0922	16.9272	16.9873				-1	6	6	6	7.9	7.9	7.9	99.849	0	94.457	2855000	44	51	NbD043174.1;NbD031427.1	NbD043174.1;NbD031427.1	1589
17.9032	17.886	17.64	18.0145	17.8453	18.1364				-1	3	3	3	13.5	13.5	13.5	52.86	0	31.229	2766400	27	20	NbD052167.1;NbD031440.1	NbD052167.1;NbD031440.1	1590
16.1932	15.8384	16.156	17.4305	17.4691	17.1435				-1	11	11	3	9.9	9.9	2.7	123.06	0	236.58	4776200	60	62	NbE05065387.1;NbD031547.1	NbE05065387.1;NbD031547.1	1595
NaN	16.2572	NaN	18.0536	17.9003	17.914				-1	6	6	6	16	16	16	65.329	0	113.1	3549200	26	39	NbD031876.1;NbE03053928.1;NbD021838.1	NbD031876.1;NbE03053928.1	1600
NaN	NaN	NaN	17.8012	17.7846	17.8599				-1	9	2	2	27.2	8	8	29.77	0	41.676	2228200	16	21	NbD038896.1;NbD031906.1	NbD038896.1;NbD031906.1	1601
14.8275	14.6481	14.9566	15.4225	15.1597	15.2252				-1	2	2	2	17.3	17.3	17.3	22.519	0	22.885	929530	13	27	NbD031933.1;NbD025768.1	NbD031933.1;NbD025768.1	1603
17.0527	17.0342	17.0782	16.5461	16.9767	16.2985				-1	5	5	5	21.8	21.8	21.8	32.823	0	67.163	1622600	19	24	NbD042629.1;NbD031945.1	NbD042629.1;NbD031945.1	1605
15.4469	NaN	NaN	16.1174	16.0693	16.3583				-1	6	6	6	29.4	29.4	29.4	36.937	0	55.7	1580300	18	28	NbD032065.1;NbD007410.1	NbD032065.1;NbD007410.1	1610
20.0234	20.1209	19.8984	19.6817	19.7414	19.892				-1	30	30	1	45.6	45.6	4.7	42.714	0	323.31	78798000	24	285	NbD032270.1	NbD032270.1	1613
16.9081	16.8994	16.8062	NaN	17.3034	17.281				-1	3	3	3	9	9	9	34.3	0	173.5	2172800	11	23	NbD052062.1;NbD032282.1	NbD052062.1;NbD032282.1	1614
NaN	NaN	NaN	15.481	15.4705	15.4989				-1	1	1	1	1.2	1.2	1.2	105.93	0.0014025	7.5787	528270	56	14	NbD032286.1	NbD032286.1	1615
15.5006	15.5534	15.4987	15.5889	15.6219	15.7454				-1	8	8	4	30.8	30.8	16.6	41.44	0	68.13	1661700	20	38	NbD032343.1;NbE03055419.1;NbD036138.1;NbD025641.1	NbD032343.1	1617
18.2807	18.4053	18.1792	18.166	18.3801	18.2618				-1	15	4	4	32.3	15.2	15.2	46.783	0	175.91	7564000	24	37	NbD032401.1	NbD032401.1	1621
16.0089	16.0194	16.1287	16.6337	16.5294	16.6327				-1	4	4	4	9.7	9.7	9.7	66.383	0	36.27	1958800	37	30	NbD032404.1;NbE44071324.1;NbD023587.1	NbD032404.1;NbE44071324.1;NbD023587.1	1622
15.5764	15.7525	15.9497	15.0909	15.0409	15.0284				-1	5	5	5	14.6	14.6	14.6	36.046	0	42.382	973040	22	23	NbD032406.1	NbD032406.1	1623
18.0562	17.9773	17.8378	18.1149	18.1052	18.1856				-1	23	16	1	29.2	26.7	5.3	47.923	0	323.31	8299300	27	87	NbD032435.1	NbD032435.1	1624
19.19	19.1945	19.0598	18.3124	18.5946	18.4347				-1	7	7	1	26.5	26.5	3.2	53.412	0	174.53	11416000	25	83	NbD032556.1	NbD032556.1	1630
16.366	15.9759	16.1401	15.8683	15.5052	15.6002				-1	6	6	2	29.1	29.1	11.8	22.666	0	55.655	1362500	9	28	NbD034965.1;NbD032589.1	NbD034965.1;NbD032589.1	1633
17.048	17.4183	17.2579	17.8023	17.5066	17.6681				-1	12	12	9	30.6	30.6	22	54.4	0	304.22	5872200	23	89	NbD032603.1	NbD032603.1	1635
NaN	NaN	NaN	15.4502	15.7543	15.5855				-1	3	3	2	4.6	4.6	3.4	103.78	0	27.06	771380	46	20	NbE03055157.1;NbD032607.1;NbD040865.1;NbE44073360.1;NbE03057648.1;NbD041240.1;NbE03055022.1	NbE03055157.1;NbD032607.1;NbD040865.1;NbE44073360.1;NbE03057648.1	1636
20.529	20.4371	20.651	20.3197	20.4691	20.5019				-1	24	24	18	78.7	78.7	64.5	17.003	0	323.31	105460000	12	260	NbD032611.1;NbE44073039.1;NbD026843.1;NbD000188.1;NbE03061933.1;NbD035940.1	NbD032611.1;NbE44073039.1;NbD026843.1	1637
16.196	NaN	NaN	17.0966	17.142	17.0255				-1	3	3	3	4.1	4.1	4.1	86.137	0	65.566	1488400	40	23	NbD032620.1	NbD032620.1	1639
15.9333	15.3433	15.6488	16.5039	16.3355	NaN				-1	5	5	5	20.8	20.8	20.8	41.784	0	58.611	1153900	21	22	NbD032653.1;NbE05065913.1;NbD026243.1;NbE44069512.1;NbD034138.1	NbD032653.1;NbE05065913.1;NbD026243.1	1642
15.5889	15.8534	15.6892	16.051	15.9003	16.009				-1	9	9	9	12.7	12.7	12.7	95.914	0	76.1	1731900	48	44	NbE03056313.1;NbD052069.1;NbD032680.1	NbE03056313.1;NbD052069.1;NbD032680.1	1645
16.166	16.1909	16.3673	17.3108	17.0807	17.143				-1	34	17	5	43.9	23.3	9	69.311	0	244.2	5064400	31	93	NbD032697.1;NbE03057177.1	NbD032697.1;NbE03057177.1	1646
16.3495	16.2757	16.5079	17.4106	17.2961	17.4049				-1	3	3	3	6.1	6.1	6.1	52.567	0	61.549	2438200	24	19	NbD032700.1	NbD032700.1	1647
NaN	NaN	NaN	18.115	18.3946	18.0756				-1	2	2	2	6.3	6.3	6.3	65.312	0	14.596	1666500	21	7	NbD032988.1;NbD032740.1;NbD009839.1;NbD001604.1	NbD032988.1;NbD032740.1;NbD009839.1;NbD001604.1	1649
19.5969	19.4026	19.8329	19.0461	19.2291	19.1657				-1	32	14	0	55.7	32	0	48.525	0	323.31	21635000	21	159	NbD032982.1;NbD042270.1	NbD032982.1;NbD042270.1	1658
18.2375	18.2516	17.9103	17.1318	17.3056	17.3288				-1	11	11	11	38.3	38.3	38.3	22.105	0	323.31	7881700	11	72	NbE05065213.1;NbD033086.1;NbE03060805.1	NbE05065213.1;NbD033086.1;NbE03060805.1	1661
19.0509	19.223	18.9893	17.3748	17.5699	17.5242				-1	37	8	3	46	8.2	2.6	70.894	0	166.12	8385000	37	54	NbD033096.1	NbD033096.1	1663
16.2261	16.5493	16.4089	NaN	NaN	NaN				-1	25	3	3	69.1	4.3	4.3	47.836	0	19.232	752420	23	12	NbD033120.1	NbD033120.1	1664
NaN	NaN	NaN	15.427	15.0933	15.2774				-1	5	5	5	7.4	7.4	7.4	89.741	0	51.799	503170	20	14	NbD033194.1;NbE05065869.1;NbD013920.1	NbD033194.1;NbE05065869.1;NbD013920.1	1666
15.7328	16.0531	15.6326	NaN	15.5916	NaN				-1	4	4	4	11.4	11.4	11.4	51.399	0	28.804	861300	23	18	NbD033238.1	NbD033238.1	1667
16.7738	16.682	16.7277	16.5023	16.6155	16.7876				-1	14	3	3	36	7.1	7.1	51.938	0	104.2	1898200	27	31	NbD044987.1;NbD033314.1	NbD044987.1;NbD033314.1	1669
16.3363	16.5712	16.282	NaN	NaN	NaN				-1	3	3	3	18.9	18.9	18.9	44.723	0	31.451	700000	14	15	NbD033329.1;NbE03059003.1;NbD014909.1;NbE03055025.1	NbD033329.1;NbE03059003.1;NbD014909.1;NbE03055025.1	1671
NaN	NaN	14.9801	17.3915	17.1806	17.1541				-1	6	1	1	16.7	5.4	5.4	66.247	0	22.214	1474300	30	15	NbD033387.1	NbD033387.1	1674
11.9112	NaN	NaN	16.7572	16.8088	16.7802				-1	21	13	4	34.9	22.6	4.7	72.9	0	323.31	7594900	37	122	NbD033440.1	NbD033440.1	1679
19.5296	19.3926	19.1873	19.271	19.4224	19.4421				-1	13	13	13	14.1	14.1	14.1	122.72	0	308.03	13797000	56	76	NbD033492.1;NbE05067284.1;NbE05067285.1	NbD033492.1;NbE05067284.1;NbE05067285.1	1680
NaN	NaN	NaN	14.788	14.7873	14.691				-1	3	3	1	47.9	47.9	21.9	10.961	0	26.477	284790	5	11	NbD033544.1	NbD033544.1	1683
20.3466	20.5197	20.4043	19.4827	19.5812	19.6181				-1	24	11	1	50	25.5	3.8	42.745	0	323.31	26136000	21	110	NbD033628.1	NbD033628.1	1687
16.0542	16.3957	16.6117	15.4338	15.4852	15.3791				-1	7	7	7	10.7	10.7	10.7	124.9	0	133.59	1201300	52	28	NbD033657.1;NbD048406.1	NbD033657.1;NbD048406.1	1690
18.6296	18.338	18.75	18.1555	17.9963	18.0068				-1	3	3	3	5.4	5.4	5.4	66.676	0	88.193	4468600	30	31	NbE44072718.1;NbD033674.1	NbE44072718.1;NbD033674.1	1692
15.1413	NaN	NaN	15.3723	15.4901	NaN				-1	6	1	1	12.3	4.5	4.5	59.883	0	26.134	697970	27	13	NbD033969.1;NbD045044.1;NbE44070074.1	NbD033969.1;NbD045044.1;NbE44070074.1	1698
19.6947	19.7406	19.5078	19.4133	19.3877	19.4834				-1	9	9	4	29.4	29.4	12.5	38.07	0	236.69	14567000	20	75	NbD034030.1;NbD000335.1	NbD034030.1	1700
14.8844	14.9413	14.4129	NaN	NaN	NaN				-1	2	2	2	22	22	22	23.587	0	28.011	231950	13	11	NbD034130.1;NbD036526.1	NbD034130.1;NbD036526.1	1703
NaN	NaN	NaN	16.0074	16.179	16.2				-1	3	3	2	7.8	7.8	5.8	85.067	0	28.122	620070	35	13	NbD034157.1;NbE03056812.1	NbD034157.1;NbE03056812.1	1704
14.6964	14.6679	14.0536	15.9465	15.7859	15.9305				-1	3	3	3	13.6	13.6	13.6	38.727	0	75.598	1164000	14	27	NbD034166.1;NbD002181.1	NbD034166.1;NbD002181.1	1705
16.5415	16.7662	16.4918	16.4552	16.6051	16.6308				-1	3	3	1	52	52	24	11.297	0	105.08	1949900	6	28	NbD034176.1	NbD034176.1	1706
17.1368	17.364	17.4864	18.0082	18.0982	18.162				-1	8	8	3	21.5	21.5	10.2	66.2	0	107.59	6392100	30	47	NbD034251.1	NbD034251.1	1713
15.8412	16.0718	16.0411	16.12	15.9109	15.9665				-1	9	9	2	31.6	31.6	6.4	49.216	0	103.24	1677900	29	41	NbD034262.1	NbD034262.1	1714
16.0893	16.1115	16.2487	NaN	NaN	NaN				-1	6	6	2	46.2	46.2	13.8	16.264	0	35.276	767880	8	16	NbD034351.1;NbD034350.1	NbD034351.1;NbD034350.1	1716
17.5663	17.7651	17.5587	17.3083	17.238	17.4192				-1	24	24	8	61.4	61.4	21.1	61.059	0	323.31	14003000	34	186	NbD034490.1	NbD034490.1	1722
18.8916	18.4358	18.3987	NaN	NaN	NaN				-1	3	3	3	17.2	17.2	17.2	11.235	0	28.444	2440000	5	13	NbD034730.1	NbD034730.1	1730
17.6868	17.7665	17.0245	16.6134	16.7599	16.9068				-1	17	2	2	34.5	5.1	5.1	67.129	0	39.825	2273500	33	22	NbD034758.1	NbD034758.1	1732
18.2093	18.2107	18.1756	17.8357	17.8649	17.8975				-1	11	11	7	57	57	39.6	27.121	0	157.71	5955500	16	79	NbD034762.1;NbD051264.1	NbD034762.1	1733
17.654	17.5966	17.523	17.3554	17.3632	17.4165				-1	30	30	4	38	38	5	102.63	0	316.27	11012000	47	175	NbE44071929.1;NbD034912.1;NbE44071928.1;NbD037217.1;NbE44069944.1	NbE44071929.1;NbD034912.1;NbE44071928.1;NbD037217.1;NbE44069944.1	1737
NaN	NaN	NaN	16.6813	16.6173	16.521				-1	7	7	4	14.9	14.9	8.7	52.337	0	158.21	2629500	16	41	NbE03060478.1;NbD034991.1	NbE03060478.1;NbD034991.1	1739
20.6763	20.6638	20.4258	20.66	20.7017	20.7349				-1	11	7	3	47.1	44.3	17.6	28.765	0	97.725	20524000	15	34	NbD035150.1;NbE03062133.1	NbD035150.1	1743
15.3265	15.1659	15.321	15.6078	15.3649	15.3406				-1	5	5	5	23.6	23.6	23.6	17.739	0	46.434	838960	7	24	NbD035155.1;NbD049242.1;NbE44073052.1	NbD035155.1;NbD049242.1;NbE44073052.1	1744
17.1954	17.0571	17.2492	16.4523	16.6224	16.6575				-1	9	9	9	45.3	45.3	45.3	30.071	0	179.64	3827100	15	61	NbD035250.1;NbE03061717.1;NbE03054332.1;NbD016966.1	NbD035250.1;NbE03061717.1	1747
15.6788	15.289	15.2905	16.7101	16.6777	16.663				-1	9	9	9	34	34	34	33.817	0	91.591	3237100	17	57	NbE03054354.1;NbD035284.1;NbD016501.1;NbD021450.1;NbD040807.1	NbE03054354.1;NbD035284.1	1749
NaN	NaN	NaN	14.6746	14.6007	14.5517				-1	2	2	2	2.9	2.9	2.9	127.34	0	23.814	290720	61	10	NbE44074289.1;NbD035431.1;NbE05063596.1;NbE44071961.1;NbD003740.1	NbE44074289.1;NbD035431.1;NbE05063596.1;NbE44071961.1;NbD003740.1	1753
17.527	17.1065	17.5853	17.9497	17.7853	17.7465				-1	8	8	1	26.3	26.3	7.4	42.426	0	195.19	6594800	23	61	NbE03058615.1;NbD035651.1	NbE03058615.1;NbD035651.1	1761
19.0002	19.0854	18.6787	17.8793	18.2234	16.6064				-1	12	12	12	16	16	16	74.283	0	137.17	8327100	39	61	NbD035774.1;NbD029400.1	NbD035774.1	1764
17.6518	17.6289	17.7767	18.1529	18.1668	18.3067				-1	8	5	4	25.9	19.9	19.9	28.627	0	93.931	8082000	13	64	NbD049018.1;NbD035868.1	NbD049018.1;NbD035868.1	1766
16.2975	16.0733	15.9912	16.7562	16.6765	16.7825				-1	5	5	5	10	10	10	50.155	0	75.816	2017600	19	33	NbD035885.1;NbD005366.1	NbD035885.1	1767
14.8397	14.5775	14.3104	18.6684	18.6682	18.2649				-1	23	22	13	14	13.5	9.4	188.16	0	261.08	11495000	86	115	NbD035909.1;NbE44074431.1	NbD035909.1;NbE44074431.1	1768
21.7773	21.6994	21.3624	21.1328	21.1348	21.2312				-1	17	17	2	63.2	63.2	14.8	27.406	0	323.31	133070000	13	375	NbD035922.1;NbD007480.1	NbD035922.1	1769
18.3495	18.1271	18.088	18.4922	18.4247	18.4079				-1	4	4	3	23.7	23.7	17	25.202	0	72.94	7182900	14	49	NbD036019.1	NbD036019.1	1772
NaN	NaN	NaN	14.8847	14.9111	14.8845				-1	16	3	3	17.4	5.3	5.3	136.97	0	46.285	567730	66	17	NbD036033.1	NbD036033.1	1774
18.5192	18.5533	18.8	18.6036	18.707	NaN				-1	17	3	3	31.9	7.1	7.1	79.461	0	47.731	4687700	32	23	NbD036057.1	NbD036057.1	1775
NaN	NaN	NaN	15.7053	15.6255	15.6269				-1	5	5	5	35.3	35.3	35.3	22.204	0	97.503	753660	12	19	NbD036077.1;NbE03059486.1;NbD049545.1	NbD036077.1;NbE03059486.1;NbD049545.1	1776
15.4724	15.4023	15.5062	15.8922	15.85	15.7359				-1	5	5	2	9.8	9.8	3.5	92.453	0	105.66	1399200	49	32	NbE03056530.1;NbD036129.1	NbE03056530.1;NbD036129.1	1778
NaN	NaN	NaN	15.2303	15.5635	15.4809				-1	6	2	2	29.6	11.5	11.5	28.16	0	25.185	447890	14	11	NbD036321.1	NbD036321.1	1781
NaN	NaN	NaN	16.1546	16.0503	15.7789				-1	6	3	3	21.4	12.6	12.6	52.053	0	55.243	1121600	19	23	NbD050542.1;NbD036339.1	NbD050542.1;NbD036339.1	1782
17.4011	17.1655	17.2168	16.9181	17.2045	17.1609				-1	2	2	2	19.8	19.8	19.8	27.782	0	136.34	2281100	14	24	NbD036346.1;NbD011439.1;NbD050070.1;NbD027109.1	NbD036346.1;NbD011439.1;NbD050070.1;NbD027109.1	1784
16.7916	17.1016	17.1574	15.8918	15.7928	15.9292				-1	4	4	4	16.4	16.4	16.4	45.293	0	51.235	1602200	19	26	NbD036388.1	NbD036388.1	1786
NaN	15.0542	15.2103	15.6517	NaN	15.9777				-1	5	5	1	9.2	9.2	2.1	75.719	0	57.732	1300100	33	28	NbD036393.1	NbD036393.1	1788
NaN	NaN	NaN	17.5369	17.407	17.4231				-1	9	9	4	49.2	49.2	25.6	28.095	0	188.29	3000300	14	34	NbD036440.1;NbD046539.1	NbD036440.1;NbD046539.1	1789
17.7898	17.7883	17.8292	17.8423	18.2196	18.1931				-1	3	3	2	19.4	19.4	13.5	28.639	0	34.825	4881500	17	25	NbD036935.1	NbD036935.1	1812
16.3586	16.3574	NaN	16.1181	16.1677	16.1994				-1	5	5	5	5	5	5	180.14	0	76.493	2076700	70	35	NbD036968.1	NbD036968.1	1814
NaN	NaN	NaN	14.8824	15.0844	15.0667				-1	2	2	2	6.2	6.2	6.2	63.433	0	16.455	558270	32	16	NbD037085.1	NbD037085.1	1818
14.8171	15.1405	14.6763	NaN	NaN	NaN				-1	16	1	1	58	9.6	9.6	27.407	0.0010741	10.412	272340	13	10	NbD037141.1	NbD037141.1	1820
16.5046	16.2354	17.155	16.9404	NaN	NaN				-1	4	4	4	25.3	25.3	25.3	33.835	0	52.655	1539600	16	19	NbD037307.1	NbD037307.1	1821
15.8155	15.9937	16.0221	17.827	17.655	17.6774				-1	14	14	14	12	12	12	118.81	0	185.76	7137900	49	74	NbD048716.1;NbD037391.1;NbE44073564.1;NbE05068163.1;NbD046159.1	NbD048716.1;NbD037391.1;NbE44073564.1	1823
21.7352	21.7972	21.9148	22.0436	21.9984	22.0508				-1	12	11	2	36.7	36.7	12.6	39.89	0	323.31	66749000	21	101	NbD037457.1	NbD037457.1	1829
17.7431	17.6884	17.4359	18.0431	18.1719	18.3218				-1	17	17	6	27.8	27.8	14.8	83.299	0	201.18	11334000	46	99	NbD037529.1;NbE05063298.1	NbD037529.1;NbE05063298.1	1831
18.7622	18.759	18.6331	18.2319	18.3957	18.3009				-1	25	25	3	67.3	67.3	6.5	47.87	0	323.31	19024000	23	182	NbD037657.1;NbD042442.1	NbD037657.1	1835
20.0046	19.7875	19.6091	19.1152	19.0893	19.0688				-1	8	8	3	60.4	60.4	20.7	18.445	0	144.44	13633000	12	61	NbD038044.1	NbD038044.1	1848
17.4224	17.7242	16.3595	17.5295	17.332	17.7695				-1	10	10	10	39.1	39.1	39.1	41.552	0	143.76	4248800	21	60	NbD038085.1;NbE05064560.1;NbE05063200.1;NbD035718.1	NbD038085.1;NbE05064560.1;NbE05063200.1;NbD035718.1	1851
18.5393	18.5384	18.4468	18.0309	18.227	18.2774				-1	15	15	2	27.5	27.5	4.1	75.818	0	323.31	14637000	37	109	NbE03053451.1;NbD038127.1	NbE03053451.1;NbD038127.1	1854
15.4868	15.2104	15.2054	15.4101	15.3041	15.2645				-1	4	4	2	17.6	17.6	9.4	35.368	0	32.964	684790	14	20	NbE05066728.1;NbD038147.1	NbE05066728.1;NbD038147.1	1855
NaN	NaN	NaN	17.6828	17.5457	17.764				-1	2	2	1	6.3	6.3	3.7	49.568	0	39.436	3763700	16	23	NbD040415.1;NbD038247.1;NbE44069407.1;NbE03058410.1;NbE03054217.1;NbD043709.1	NbD040415.1;NbD038247.1;NbE44069407.1;NbE03058410.1;NbE03054217.1;NbD043709.1	1861
18.2677	18.4063	17.9619	NaN	17.1094	17.1776				-1	4	4	4	12.3	12.3	12.3	47.587	0	49.803	4486500	25	29	NbE05066261.1;NbD038254.1;NbE03054200.1	NbE05066261.1;NbD038254.1;NbE03054200.1	1862
20.3555	20.6537	20.5981	20.3489	20.5742	20.3423				-1	7	7	7	34.3	34.3	34.3	25.329	0	253.45	41329000	10	112	NbD038259.1	NbD038259.1	1863
16.753	17.1005	15.9442	15.2912	15.6414	15.4862				-1	9	5	5	43.8	29.2	29.2	28.766	0	75.097	1593200	14	27	NbD038602.1;NbD004679.1;REV__NbD048599.1;REV__NbD030177.1	NbD038602.1	1872
17.9258	17.8589	18.1666	18.6756	18.483	18.5794				-1	3	2	2	15.2	8.5	8.5	25.176	0	85.793	7558300	14	32	NbD038663.1	NbD038663.1	1873
NaN	NaN	16.2063	16.2714	16.3955	16.6095				-1	6	5	1	24.7	24.7	6.6	31.601	0	73.468	2084000	18	31	NbD038738.1	NbD038738.1	1876
16.3267	16.2419	16.2992	16.4707	16.6382	16.4712				-1	5	5	2	11.8	11.8	5.5	42.272	0	62.57	2531800	26	39	NbD038769.1	NbD038769.1	1877
14.6826	NaN	14.5808	15.2926	15.2074	15.3092				-1	2	2	2	5.5	5.5	5.5	31.547	0	30.514	717120	10	22	NbD038785.1	NbD038785.1	1879
NaN	NaN	NaN	15.6603	15.7336	15.7002				-1	12	2	2	40	11.1	11.1	41.91	0	26.461	677510	21	15	NbE44069535.1;NbD038800.1	NbE44069535.1;NbD038800.1	1880
15.0678	NaN	15.2531	15.3888	15.3714	15.0509				-1	4	4	4	14.8	14.8	14.8	48.023	0	39.638	946260	23	28	NbD038801.1	NbD038801.1	1881
17.1299	15.0318	15.7528	18.3785	18.0207	18.0677				-1	8	8	5	31.9	31.9	24.2	35.198	0	173.04	4927900	20	43	NbD038829.1;NbE44069782.1	NbD038829.1	1882
22.0263	21.8465	21.7495	21.2141	21.2479	21.2636				-1	11	11	1	34.6	34.6	2.7	56.459	0	323.31	46272000	22	69	NbD038858.1	NbD038858.1	1884
16.0986	15.9824	15.8094	NaN	16.0413	15.8849				-1	7	7	7	16.2	16.2	16.2	67.376	0	93.99	1513600	28	30	NbD038945.1;NbE03055088.1;NbD024401.1	NbD038945.1;NbE03055088.1;NbD024401.1	1887
17.6885	17.9871	17.6041	16.6396	15.8471	16.0473				-1	7	7	7	18	18	18	48.416	0	112.89	3858400	21	57	NbD040189.1;NbD038950.1;NbD050709.1;NbD011358.1	NbD040189.1;NbD038950.1;NbD050709.1	1888
15.4844	15.5767	15.5833	16.6314	16.4088	16.6021				-1	7	7	7	6.8	6.8	6.8	121.79	0	91.522	2955700	50	67	NbD040723.1;NbD038952.1;NbE03060405.1;NbD023008.1	NbD040723.1;NbD038952.1	1889
15.3964	15.408	15.0415	NaN	14.9511	15.0828				-1	7	5	5	27.8	16.9	16.9	39.197	0	120.11	896230	15	28	NbD039123.1	NbD039123.1	1893
16.4182	16.5583	16.3603	16.449	16.4972	16.5398				-1	22	5	5	35.7	11.5	11.5	70.451	0	92.115	3287700	30	45	NbD039145.1	NbD039145.1	1894
NaN	15.3942	15.6785	18.4778	18.1044	18.6038				-1	10	10	1	56.6	56.6	8.4	16.029	0	185.1	6720500	10	49	NbD039357.1;NbD039356.1	NbD039357.1;NbD039356.1	1903
NaN	NaN	NaN	16.4481	16.383	16.4933				-1	10	10	7	16.4	16.4	13.6	99.626	0	96.562	2000100	43	32	NbD039406.1;NbE44071008.1	NbD039406.1;NbE44071008.1	1905
18.8707	18.8682	19.0872	19.3918	19.3262	19.3972				-1	8	2	0	41.1	15.5	0	29.051	0	23.907	13546000	15	19	NbD039463.1;NbD002087.1;NbE05068863.1	NbD039463.1;NbD002087.1	1907
16.8177	16.7318	16.9698	16.0548	16.1971	16.2289				-1	10	10	10	44.4	44.4	44.4	41.716	0	200.58	2523000	23	39	NbD039485.1;NbD022460.1	NbD039485.1;NbD022460.1	1910
17.0991	17.1839	17.2872	18.4712	18.6128	18.5734				-1	10	10	0	27.1	27.1	0	66.832	0	256.79	7532100	32	81	NbD039501.1	NbD039501.1	1911
15.4686	15.6512	15.6136	15.4864	15.611	15.4707				-1	5	5	1	17.2	17.2	2.8	48.951	0	70.418	1149900	24	35	NbD039596.1	NbD039596.1	1913
NaN	NaN	NaN	14.8988	14.8757	14.6957				-1	2	2	1	3.9	3.9	3.9	61.696	0	25.111	300140	29	11	NbD039597.1	NbD039597.1	1914
16.9677	16.8395	16.3755	16.6482	16.527	16.4815				-1	9	9	1	22	22	2.6	64.084	0	159.98	3773900	29	70	NbD039621.1	NbD039621.1	1915
15.208	15.522	14.9745	NaN	NaN	NaN				-1	8	8	8	44.8	44.8	44.8	28.574	0	71.229	872450	17	29	NbD039711.1;NbE44072319.1;NbD031052.1	NbD039711.1	1921
NaN	NaN	NaN	15.703	15.4422	15.7037				-1	8	8	4	8.4	8.4	3.4	130.75	0	83.538	807140	63	24	NbD039722.1;NbE05063486.1;NbD030447.1	NbD039722.1;NbE05063486.1;NbD030447.1	1922
17.8777	17.8079	18.069	16.8691	17.0597	17.141				-1	3	3	3	20.2	20.2	20.2	23.981	0	90.273	4190600	13	44	NbD039872.1;NbD030662.1	NbD039872.1;NbD030662.1	1927
17.3276	16.9898	NaN	16.5313	16.9074	16.484				-1	4	4	3	18.4	18.4	12.1	27.527	0	26.38	1923900	12	30	NbE03061776.1;NbD039901.1	NbE03061776.1;NbD039901.1	1928
NaN	NaN	NaN	13.526	13.2988	13.3662				-1	1	1	1	9.6	9.6	9.6	26.642	0	43.945	120500	13	11	NbE05066320.1;NbD046680.1;NbD039935.1	NbE05066320.1;NbD046680.1;NbD039935.1	1929
17.9723	18.0495	17.6723	17.3934	17.3478	17.4463				-1	6	6	2	20.3	20.3	6.7	43.172	0	69.682	2828500	22	39	NbE03060269.1;NbD040004.1	NbE03060269.1;NbD040004.1	1932
NaN	NaN	15.8289	NaN	16.8644	16.9062				-1	2	2	2	9.9	9.9	9.9	22.71	0	61.115	1348600	13	13	NbD043370.1;NbD040054.1	NbD043370.1;NbD040054.1	1936
17.0601	17.2493	16.7702	16.2925	16.4903	16.4674				-1	14	14	7	39.3	39.3	17.2	49.825	0	189.93	4046600	28	68	NbD040581.1	NbD040581.1	1947
15.6837	15.7293	NaN	16.1827	16.1757	16.159				-1	3	3	1	26.2	26.2	8.5	14.772	0	22.544	1275300	8	23	NbD040744.1	NbD040744.1	1950
15.7802	15.7764	15.8804	NaN	15.9192	16.0602				-1	4	4	4	16.7	16.7	16.7	41.402	0	29.858	996540	17	20	NbD040783.1	NbD040783.1	1951
NaN	NaN	14.9897	15.1843	15.5516	15.1585				-1	5	5	4	12.2	12.2	10	94.115	0	65.32	1134900	40	27	NbD040833.1;NbE03056374.1;NbD013711.1	NbD040833.1;NbE03056374.1;NbD013711.1	1952
NaN	NaN	NaN	17.2812	17.2804	17.3192				-1	8	5	5	14	10.7	10.7	88.739	0	78.591	1942200	36	17	NbE05065923.1;NbD040967.1	NbE05065923.1;NbD040967.1	1956
16.5725	16.6455	16.4779	16.2352	16.2609	16.2891				-1	5	5	5	13.4	13.4	13.4	26.342	0	68.708	1990300	16	30	NbD041017.1;NbE05068548.1	NbD041017.1	1959
18.2814	18.129	17.9971	NaN	17.235	17.2374				-1	3	2	2	19.8	13.8	13.8	18.506	0	96.557	3355300	7	22	NbE44074385.1;NbD052623.1;NbD041039.1;NbE03061566.1	NbE44074385.1;NbD052623.1;NbD041039.1;NbE03061566.1	1960
NaN	15.3821	14.9821	15.8532	15.705	15.928				-1	3	3	1	8.7	8.7	8.7	25.151	0	107.16	1165300	10	27	NbD041230.1	NbD041230.1	1963
16.0604	NaN	NaN	16.2176	16.2816	15.9299				-1	3	3	3	13.2	13.2	13.2	55.211	0	36.746	902080	26	17	NbD041315.1;NbD034996.1;NbE03058706.1;NbD009908.1	NbD041315.1	1965
15.6503	15.2485	15.6764	16.2784	16.3269	16.2905				-1	6	6	5	18.1	18.1	14.4	61.417	0	93.431	1193000	26	29	NbD041325.1	NbD041325.1	1966
18.1767	18.3175	18.0867	17.748	17.8064	17.7439				-1	20	20	8	43.6	43.6	27.1	53.31	0	323.31	14605000	25	151	NbD041382.1;NbD051021.1	NbD041382.1	1968
NaN	16.8229	NaN	16.6929	16.5136	16.4629				-1	3	3	3	19.5	19.5	19.5	24.917	0	35.435	1030500	13	17	NbD041402.1	NbD041402.1	1970
15.2449	NaN	15.4138	NaN	14.5874	NaN				-1	3	3	3	18.2	18.2	18.2	35.63	0	24.576	543480	17	17	NbD049285.1;NbD041451.1;NbD041839.1;NbD003856.1	NbD049285.1;NbD041451.1;NbD041839.1;NbD003856.1	1974
NaN	NaN	NaN	16.1696	16.3034	16.3927				-1	11	11	3	14.6	14.6	5.8	92.921	0	106.27	2783200	40	54	NbE05066340.1;NbD041659.1	NbE05066340.1;NbD041659.1	1979
19.1442	19.2473	19.0957	19.8296	19.6543	19.6691				-1	10	6	6	71.7	42	42	24.491	0	323.31	23738000	10	65	NbD041733.1	NbD041733.1	1981
15.9126	15.9038	15.6279	15.4655	NaN	15.5652				-1	2	2	2	6.4	6.4	6.4	47.115	0	19.397	584950	21	17	NbD041752.1	NbD041752.1	1982
NaN	NaN	16.4251	17.6209	17.6339	17.4161				-1	8	2	2	34.7	14.1	14.1	24.816	0	16.613	1260800	7	13	NbD041916.1	NbD041916.1	1986
15.0473	14.7583	NaN	16.2496	16.1401	16.1976				-1	4	4	4	9.8	9.8	9.8	73.341	0	102.57	1362100	16	25	NbD041947.1;NbD012457.1	NbD041947.1;NbD012457.1	1987
NaN	NaN	NaN	15.9634	15.6844	15.508				-1	3	3	3	26.8	26.8	26.8	13.319	0	131.68	561320	6	17	NbD042103.1;NbD008222.1	NbD042103.1	1991
18.5468	18.5203	18.2619	17.954	18.0388	17.9103				-1	19	11	7	60.5	42.1	32.9	36.651	0	252.76	12439000	20	104	NbD042406.1;NbD033988.1	NbD042406.1;NbD033988.1	1997
19.185	19.2871	18.918	18.8966	18.762	18.9195				-1	8	8	8	23.4	23.4	23.4	47.06	0	323.31	15964000	25	82	NbD042499.1;NbD051704.1;NbE44072658.1;NbD030814.1	NbD042499.1;NbD051704.1;NbE44072658.1	1998
NaN	NaN	NaN	16.3803	16.3497	16.42				-1	5	5	2	13.5	13.5	6.2	59.351	0	83.527	1176600	35	21	NbE05066373.1;NbD042535.1;NbE44069436.1;NbD042714.1	NbE05066373.1;NbD042535.1;NbE44069436.1;NbD042714.1	2000
NaN	NaN	NaN	16.2547	16.1341	16.0978				-1	3	3	3	5.7	5.7	5.7	112.15	0	46.825	1048900	60	15	NbE03059461.1;NbD046938.1;NbE03054676.1;NbD042537.1	NbE03059461.1;NbD046938.1;NbE03054676.1;NbD042537.1	2001
19.1566	18.8514	19.1236	18.3917	18.2702	18.4063				-1	20	16	1	37.9	35.3	3.3	73.73	0	214.57	8026500	31	78	NbD042545.1;NbD027560.1	NbD042545.1;NbD027560.1	2002
20.4043	20.625	20.3057	20.7503	20.7411	20.7763				-1	14	14	3	29.3	29.3	7.6	49.279	0	323.31	62175000	25	205	NbD042613.1	NbD042613.1	2004
18.4238	18.4492	18.3845	18.2267	18.3995	18.512				-1	13	11	5	44.8	32.3	10.8	30.527	0	242.81	12349000	16	92	NbD042666.1	NbD042666.1	2005
NaN	NaN	NaN	17.6505	17.4008	17.5318				-1	6	6	6	10	10	10	78.178	0	87.493	2166000	40	23	NbE03055894.1;NbD042712.1;NbE44069083.1;NbD026458.1	NbE03055894.1;NbD042712.1;NbE44069083.1;NbD026458.1	2006
NaN	NaN	NaN	15.5638	15.5095	15.4196				-1	8	8	8	11.5	11.5	11.5	143.74	0	63.128	936710	68	26	NbE03054883.1;NbD042744.1	NbE03054883.1;NbD042744.1	2010
15.2791	14.967	15.2991	NaN	NaN	NaN				-1	3	3	1	10.4	10.4	3.4	65.27	0	62.338	971130	30	15	NbD042812.1	NbD042812.1	2013
21.7251	21.5487	21.7578	21.5718	21.5218	21.3905				-1	12	12	8	45.9	45.9	29	30.449	0	200.4	50973000	12	83	NbD042875.1	NbD042875.1	2016
19.028	18.981	19.0133	18.9529	18.9063	18.8844				-1	6	6	6	15.5	15.5	15.5	31.406	0	170.2	8766600	13	38	NbD042968.1	NbD042968.1	2019
17.2338	17.5428	17.2774	17.399	17.3815	17.4339				-1	13	13	13	24.8	24.8	24.8	83.162	0	158.33	7473100	36	108	NbD042984.1;NbD000727.1	NbD042984.1	2020
18.2591	18.0891	18.3878	17.4431	17.4378	17.2753				-1	13	13	5	59.9	59.9	23.3	25.959	0	198.73	7423200	13	79	NbD043166.1	NbD043166.1	2028
15.2414	15.4935	15.4272	14.7714	14.9429	14.9872				-1	3	3	3	10.4	10.4	10.4	65.736	0	37.186	685420	28	22	NbE05068512.1;NbD043315.1;NbD031005.1;NbD013047.1	NbE05068512.1;NbD043315.1	2030
18.4016	18.3219	18.4749	18.1113	18.3124	18.1617				-1	35	35	5	61.1	61.1	11	63.115	0	323.31	16984000	35	193	NbD043334.1	NbD043334.1	2033
15.111	15.1445	15.0617	14.8266	15.0001	14.8348				-1	3	3	1	13.4	13.4	5	50.327	0	48.656	734100	27	25	NbD043365.1	NbD043365.1	2034
18.808	18.7982	18.8144	18.551	18.4919	18.4489				-1	13	13	2	39.4	39.4	5.3	38.549	0	323.31	12115000	22	102	NbD043546.1	NbD043546.1	2042
NaN	NaN	NaN	16.1673	16.1042	15.8239				-1	5	5	5	14.8	14.8	14.8	47.097	0	39.944	630540	23	17	NbE05063643.1;NbD043561.1;NbE44072008.1;NbD020216.1	NbE05063643.1;NbD043561.1;NbE44072008.1;NbD020216.1	2043
17.2051	17.5646	17.4295	17.885	17.9301	17.8307				-1	2	2	2	6	6	6	46.257	0	143.4	3408000	26	27	NbD043671.1	NbD043671.1	2046
NaN	NaN	NaN	14.9071	15.0907	15.161				-1	3	3	3	11.2	11.2	11.2	45.875	0	32.641	754880	25	18	NbD051733.1;NbD043691.1;NbE05065307.1;NbE05066315.1	NbD051733.1;NbD043691.1	2047
14.8005	15.1455	NaN	15.5086	NaN	15.2658				-1	3	3	2	10.6	10.6	8.8	52.488	0	37.935	680150	28	20	NbD043782.1;NbD045004.1	NbD043782.1;NbD045004.1	2051
19.5826	19.0691	19.41	19.9713	19.8733	19.9084				-1	12	12	1	64.7	64.7	3.4	59.405	0	323.31	47846000	36	171	NbE44070628.1;NbD043965.1;NbD020023.1	NbE44070628.1;NbD043965.1;NbD020023.1	2059
21.5025	21.6358	21.2777	20.484	20.5592	20.6472				-1	26	26	2	68.2	68.2	9.6	35.959	0	323.31	121330000	20	392	NbD044058.1	NbD044058.1	2065
16.6296	16.5337	16.8492	17.1775	16.9666	16.9631				-1	1	1	1	6.8	6.8	6.8	27.736	0	35.856	1505900	15	18	NbD044090.1	NbD044090.1	2068
17.2935	NaN	NaN	17.9392	17.9353	18.1145				-1	6	6	5	61.8	61.8	60	12.398	0	302.47	5638300	6	40	NbD049064.1;NbD044174.1	NbD049064.1;NbD044174.1	2071
20.2017	20.2286	20.2746	19.9464	20.0869	20.067				-1	34	34	7	50	50	13.5	64.925	0	323.31	77977000	32	357	NbD044252.1	NbD044252.1	2072
17.4564	17.0672	17.3027	16.3146	16.3886	16.1679				-1	2	2	2	21.5	21.5	21.5	19.284	0	44.029	2488200	12	27	NbD044268.1;NbE44072467.1;NbD006582.1	NbD044268.1;NbE44072467.1;NbD006582.1	2075
15.9752	15.8277	15.824	15.9201	16.2558	16.2792				-1	10	4	1	20.7	12.8	4.7	77.784	0	186.52	1374000	40	30	NbD044387.1	NbD044387.1	2077
NaN	NaN	NaN	18.0528	17.7558	17.8836				-1	2	2	1	8.3	8.3	8.3	18.523	0	26.636	3071700	6	24	NbD044479.1	NbD044479.1	2085
16.1655	16.2663	16.1819	16.0752	16.1418	16.214				-1	4	4	4	13.5	13.5	13.5	52.798	0	60.028	1500500	18	25	NbD044570.1;NbE03053604.1;NbE03060176.1;NbD001336.1;NbD041922.1	NbD044570.1;NbE03053604.1;NbE03060176.1;NbD001336.1	2089
17.3926	17.0905	17.0904	16.5887	16.9157	16.765				-1	11	11	3	27.7	27.7	8.1	53.615	0	90.273	4583800	28	68	NbD044573.1;NbD042820.1;NbD047851.1;NbD042962.1	NbD044573.1;NbD042820.1	2090
NaN	NaN	NaN	16.3497	16.2657	16.4472				-1	11	10	10	11	10.2	10.2	144.05	0	125.47	1913900	55	35	NbD044609.1;NbE05063013.1;NbE44070943.1;NbD050310.1;NbD041688.1;NbD033593.1;NbD038763.1;NbE05063583.1;NbD018502.1;NbE44070154.1;NbE05064926.1;NbD013117.1;NbE03055146.1;NbE03055329.1;NbE44073746.1	NbD044609.1;NbE05063013.1	2092
18.9664	18.7287	19.0518	19.5383	19.546	19.4838				-1	17	17	6	52.8	52.8	22.8	35.902	0	323.31	32273000	16	155	NbD044652.1	NbD044652.1	2095
18.3383	18.3716	18.4673	18.4622	18.3154	18.2627				-1	36	16	2	43.9	22.1	4.4	84.519	0	323.31	10929000	41	94	NbD044911.1	NbD044911.1	2101
NaN	NaN	NaN	15.3293	15.2693	15.6165				-1	7	4	1	10.6	6.9	2.1	130.78	0	96.612	718010	61	19	NbE05067130.1;NbD045099.1	NbE05067130.1;NbD045099.1	2105
NaN	17.8393	17.1865	18.6298	18.6483	18.5375				-1	2	2	2	3.4	3.4	3.4	65.386	0	50.489	5156500	29	24	NbD045419.1	NbD045419.1	2116
16.737	16.5409	17.6178	17.7118	17.5205	17.6624				-1	5	5	5	7.8	7.8	7.8	50.092	0	310.52	2629900	25	37	NbE03057996.1;NbD045593.1	NbE03057996.1;NbD045593.1	2123
NaN	NaN	NaN	17.0619	17.3828	17.0822				-1	12	2	2	35.6	11.4	11.4	44.698	0	31.257	1542700	19	13	NbD045703.1	NbD045703.1	2127
NaN	NaN	NaN	16.2323	16.1332	16.3641				-1	9	9	4	17.4	17.4	8.5	50.315	0	67.575	1941800	18	32	NbD045744.1	NbD045744.1	2128
15.6058	NaN	NaN	15.5905	15.4066	15.4915				-1	2	2	2	4.2	4.2	4.2	57.264	0	33.413	1372800	26	29	NbD045756.1	NbD045756.1	2130
16.861	16.7475	16.6437	17.0654	16.2059	17.1969				-1	6	6	2	48.6	48.6	17.8	16.587	0	90.731	2296900	9	35	NbD045807.1;NbD046625.1;NbD046604.1	NbD045807.1;NbD046625.1;NbD046604.1	2132
NaN	NaN	NaN	15.6389	15.7557	15.7716				-1	7	2	2	17.6	6.9	6.9	44.362	0	16.581	941780	18	16	NbD045848.1;NbD031735.1	NbD045848.1	2134
15.6229	15.5204	15.3039	15.3721	15.1685	15.386				-1	6	6	6	30	30	30	22.852	0	87.568	1463300	10	40	NbD045868.1;NbD040333.1;NbD050805.1	NbD045868.1;NbD040333.1	2135
19.4531	19.7586	19.6401	18.4626	18.3605	18.5303				-1	10	10	3	21.1	21.1	5.3	51.712	0	156.17	14855000	24	90	NbD045966.1	NbD045966.1	2139
19.2353	19.1314	19.3276	19.018	19.1319	19.132				-1	29	29	1	45	45	2.7	62.104	0	323.31	27320000	32	199	NbD046002.1	NbD046002.1	2141
NaN	NaN	NaN	15.6929	15.826	15.7736				-1	2	2	2	4	4	4	69.273	0	22.611	641550	26	14	NbD046040.1	NbD046040.1	2142
15.3646	15.2697	NaN	16.4876	16.6777	16.5663				-1	3	1	1	28.5	17.9	17.9	13.725	0	16.291	1569100	7	17	NbD050753.1;NbD046044.1	NbD050753.1;NbD046044.1	2143
14.4331	NaN	15.3576	16.3817	16.4521	16.4431				-1	8	8	8	27.7	27.7	27.7	53.387	0	117.31	1943200	22	46	NbD046047.1;NbD051495.1;NbE03057442.1	NbD046047.1;NbD051495.1	2144
16.6884	16.9749	NaN	NaN	15.0741	NaN				-1	5	2	2	34.1	12.2	12.2	13.642	0	37.242	1124700	9	18	NbD046153.1	NbD046153.1	2149
17.9817	17.9086	17.7437	18.1995	18.0214	18.2125				-1	9	9	2	24.5	24.5	3.6	47.669	0	183.59	8106500	18	80	NbD046227.1	NbD046227.1	2151
NaN	16.2197	16.4927	16.8734	16.9124	16.8411				-1	3	3	3	5.2	5.2	5.2	51.247	0	48.417	1576100	21	23	NbD046303.1;NbD023569.1;NbD017782.1	NbD046303.1	2153
19.0599	19.3248	18.55	18.5852	18.7504	18.7789				-1	26	6	1	61	23.5	7.4	53.103	0	203.22	9047100	23	50	NbD046317.1	NbD046317.1	2154
16.2716	16.3793	15.9547	16.0633	16.3831	16.3382				-1	15	4	1	35.3	14.9	3.3	54.042	0	56.747	2084100	27	32	NbD046324.1	NbD046324.1	2155
NaN	NaN	NaN	17.543	17.3104	17.5395				-1	7	3	3	13.7	4.8	4.8	50.151	0	41.362	1758900	17	16	NbD046327.1	NbD046327.1	2156
16.0097	15.9835	16.2819	16.9471	16.8732	16.7807				-1	9	9	3	19.2	19.2	4.4	55.771	0	195.38	3301800	26	52	NbD046335.1	NbD046335.1	2157
17.7047	17.7888	17.4114	14.596	14.979	14.8883				-1	40	4	4	45.6	2.6	2.6	80.164	0	47.065	2712600	34	43	NbD046535.1	NbD046535.1	2163
16.1449	16.1558	15.4714	NaN	NaN	NaN				-1	8	8	8	32.1	32.1	32.1	44.827	0	60.857	656000	24	19	NbE05066005.1;NbD046673.1;NbD048589.1	NbE05066005.1;NbD046673.1;NbD048589.1	2168
17.8062	17.5141	17.9038	17.0193	17.1934	17.0377				-1	13	5	4	41.7	19.7	16.8	34.637	0	168.96	3726900	14	37	NbD046687.1	NbD046687.1	2169
17.1898	17.2462	17.1465	17.348	17.1998	17.3392				-1	3	3	3	20.6	20.6	20.6	26.417	0	88.966	2908500	15	26	NbE03055033.1;NbD051642.1;NbD046721.1	NbE03055033.1;NbD051642.1;NbD046721.1	2172
NaN	NaN	NaN	14.059	14.3869	14.1639				-1	4	4	3	23.4	23.4	23.4	21.206	0	58.817	409050	10	18	NbD047077.1	NbD047077.1	2178
15.105	15.0062	NaN	14.6143	NaN	14.1798				-1	5	5	5	16.9	16.9	16.9	49.882	0	54.933	678800	22	26	NbD047233.1;NbD044075.1	NbD047233.1	2184
NaN	15.5024	15.0528	15.8064	15.7069	15.7682				-1	6	6	2	6	6	1.4	107.25	0	77.965	1151500	47	33	NbE03058179.1;NbD047267.1	NbE03058179.1;NbD047267.1	2186
16.8115	16.9624	16.5206	NaN	NaN	NaN				-1	3	3	1	16.2	16.2	4.9	31.07	0	42.956	1391100	15	17	NbD047275.1	NbD047275.1	2187
NaN	NaN	16.2547	16.1703	16.236	16.0693				-1	2	2	2	8.4	8.4	8.4	38.061	0	18.528	787200	14	13	NbD047398.1;NbD047719.1	NbD047398.1;NbD047719.1	2190
18.4608	17.9744	18.4777	19.8649	19.9309	19.7288				-1	8	8	1	35.5	35.5	3.7	25.025	0	244.59	22907000	8	79	NbD047411.1;NbD015307.1	NbD047411.1	2191
16.7869	16.6625	16.3798	16.6826	16.5076	16.6256				-1	8	8	8	25.5	25.5	25.5	31.371	0	126.73	2739200	15	47	NbD047541.1;NbE44069330.1;NbD038134.1;NbE44074290.1	NbD047541.1;NbE44069330.1;NbD038134.1;NbE44074290.1	2195
15.224	15.1675	15.2177	16.1533	16.0709	15.9547				-1	4	4	2	15.2	15.2	8.7	35.424	0	86.711	1026600	16	24	NbD047628.1;NbE44071807.1	NbD047628.1;NbE44071807.1	2196
NaN	NaN	NaN	14.3602	14.6379	14.6157				-1	4	4	1	5.6	5.6	2	139.49	0	62.746	411880	70	15	NbD047841.1	NbD047841.1	2200
16.2533	15.7237	15.8355	15.4173	15.3525	15.347				-1	3	3	3	14.7	14.7	14.7	28.368	0	39.63	993990	16	21	NbE05063224.1;NbD048067.1	NbE05063224.1;NbD048067.1	2211
19.315	19.5005	19.2983	18.6276	18.9207	18.7793				-1	38	18	4	49.1	27	5.7	70.998	0	323.31	18927000	37	158	NbD048169.1	NbD048169.1	2213
20.0839	19.9608	20.3186	19.8904	19.6914	19.7616				-1	5	5	5	37.3	37.3	37.3	27.075	0	213.75	14608000	13	48	NbD048170.1;NbE03060611.1;NbE05064811.1;NbD049562.1;NbE03058388.1;NbD037285.1	NbD048170.1;NbE03060611.1;NbE05064811.1;NbD049562.1	2214
15.6046	15.7453	15.7784	NaN	NaN	NaN				-1	2	2	1	8.1	8.1	3.2	55.737	0	27.879	507520	35	10	NbD048218.1	NbD048218.1	2215
16.5261	16.5897	16.7987	19.4329	19.4402	19.3866				-1	33	33	16	21.5	21.5	10.1	202.44	0	323.31	27643000	95	188	NbE05064444.1;NbD048267.1	NbE05064444.1;NbD048267.1	2216
17.7812	17.7904	17.4946	17.6086	17.438	17.4935				-1	14	14	4	29.7	29.7	8.4	92.096	0	235.2	6081100	48	90	NbD048278.1;NbE44072860.1;NbD045153.1	NbD048278.1;NbE44072860.1	2217
NaN	NaN	NaN	15.3868	15.2847	15.4119				-1	3	3	3	24.5	24.5	24.5	27.003	0	28.94	725920	12	19	NbD048309.1;NbD031046.1;NbE03061085.1;NbD037879.1	NbD048309.1;NbD031046.1	2218
16.7598	16.5271	16.186	15.8415	16.1959	15.6929				-1	7	7	5	37.5	37.5	26.6	27.949	0	72.501	2444200	14	51	NbD048340.1;NbE03060345.1	NbD048340.1;NbE03060345.1	2220
NaN	NaN	NaN	16.3161	15.243	15.7388				-1	4	4	2	7	7	4.3	64.265	0	25.256	594970	24	16	NbE03058653.1;NbD048598.1;NbE44070631.1;NbD044497.1;NbD001031.1	NbE03058653.1;NbD048598.1;NbE44070631.1;NbD044497.1;NbD001031.1	2225
17.6521	17.7548	16.9676	16.4482	16.6021	16.7138				-1	37	4	4	41.8	6.9	6.9	71.01	0	65.329	3114300	37	34	NbD048805.1;NbD039221.1	NbD048805.1;NbD039221.1	2232
14.2196	13.5003	NaN	16.9629	17.1436	16.8904				-1	10	9	2	25.4	21.4	5.4	71.81	0	170.55	3299700	31	54	NbD048825.1;NbE03057646.1	NbD048825.1;NbE03057646.1	2233
17.1757	16.735	16.9771	17.7893	17.5422	17.6106				-1	7	7	4	20.8	20.8	12.2	53.555	0	72.962	3710100	19	48	NbD048828.1;NbD048827.1	NbD048828.1	2234
16.4602	16.5657	17.3559	18.295	17.9834	18.0056				-1	5	1	0	24.9	6.2	0	27.713	0	19.87	3945900	12	29	NbD048843.1;NbD023064.1;NbD002484.1	NbD048843.1;NbD023064.1	2236
20.1899	20.0025	20.2665	19.7555	19.9156	19.7797				-1	10	4	4	29.9	15.4	15.4	51.044	0	181.28	12325000	30	39	NbD048856.1	NbD048856.1	2237
NaN	NaN	NaN	16.381	16.3	16.3421				-1	7	7	7	9.3	9.3	9.3	112.7	0	51.508	1701300	55	23	NbE05068618.1;NbD052074.1;NbD048892.1	NbE05068618.1;NbD052074.1;NbD048892.1	2241
17.3644	17.3996	17.2805	17.7206	17.6517	17.7035				-1	7	7	4	49.4	49.4	36.1	27.706	0	316.44	5779200	10	54	NbE03058233.1;NbD048893.1	NbE03058233.1;NbD048893.1	2242
NaN	NaN	NaN	16.1215	15.8706	16.0826				-1	5	5	5	32.1	32.1	32.1	11.754	0	46.69	652930	7	17	NbD050333.1;NbD048952.1	NbD050333.1;NbD048952.1	2243
NaN	17.2141	NaN	17.404	17.2492	17.1118				-1	20	3	0	50.1	16.7	0	42.553	0	39.612	1954600	22	22	NbD048983.1	NbD048983.1	2247
17.7603	17.9439	17.8213	16.7369	17.0472	16.8322				-1	8	8	8	22	22	22	42.296	0	93.822	3471100	21	50	NbD048991.1	NbD048991.1	2248
15.25	15.0762	15.2006	15.7696	NaN	NaN				-1	2	2	2	14.4	14.4	14.4	22.811	0	50.305	607990	11	14	NbD049007.1;NbE44072129.1;NbD012257.1	NbD049007.1;NbE44072129.1;NbD012257.1	2250
18.4286	18.5863	17.9676	16.9717	17.2181	17.2473				-1	15	7	6	59.6	34.8	28	27.465	0	278.79	12795000	14	94	NbD049122.1	NbD049122.1	2257
NaN	NaN	14.6934	17.0488	16.7558	16.7762				-1	2	2	1	6.3	6.3	4	65.102	0	141.15	1241300	33	15	NbD049159.1	NbD049159.1	2258
18.188	17.8593	17.8706	16.5474	16.5887	16.7846				-1	11	3	3	51.9	15.2	15.2	25.92	0	47.384	2686600	13	35	NbD049163.1	NbD049163.1	2259
16.0572	15.7737	NaN	16.1806	16.1002	16.1734				-1	21	5	5	57.4	17.2	17.2	61.191	0	93.257	1245500	35	24	NbD049215.1	NbD049215.1	2260
NaN	NaN	NaN	15.7725	15.9842	15.8243				-1	8	8	8	14.5	14.5	14.5	84.7	0	72.249	942850	44	23	NbD049307.1	NbD049307.1	2262
NaN	NaN	NaN	18.4747	18.6008	18.464				-1	9	9	5	23.4	23.4	12.8	58.006	0	169.41	7090100	18	43	NbD049495.1;NbE03059875.1	NbD049495.1;NbE03059875.1	2269
NaN	NaN	NaN	15.1448	15.5719	15.5161				-1	3	3	3	11	11	11	53.28	0	21.759	675970	25	16	NbD049528.1	NbD049528.1	2272
15.6633	15.9646	15.9237	16.2712	16.5756	16.502				-1	10	5	5	12.7	8.1	8.1	122.94	0	114.88	1994600	63	38	NbD049531.1	NbD049531.1	2273
16.6877	16.2229	16.6345	NaN	NaN	NaN				-1	3	3	3	20.1	20.1	20.1	24.855	0	41.648	627270	13	15	NbD049573.1;NbE03060798.1;NbD003994.1	NbD049573.1;NbE03060798.1	2275
14.4124	14.5974	14.8591	NaN	15.2428	15.2363				-1	6	6	5	14.3	14.3	12	67.343	0	51.715	929610	33	32	NbD049579.1;NbD020852.1	NbD049579.1;NbD020852.1	2276
NaN	NaN	NaN	17.3863	17.4281	17.2866				-1	5	2	1	22.5	11.4	3.6	44.7	0	17.931	1809600	20	12	NbD049638.1	NbD049638.1	2279
15.2328	15.3095	15.5606	16.0356	16.1533	16.3217				-1	3	3	1	5.6	5.6	1.6	90.504	0	35.497	1099400	45	21	NbD049682.1	NbD049682.1	2280
17.7473	NaN	17.064	17.6369	18.0185	18.0436				-1	5	5	1	50	50	15.3	12.967	0	51.813	4289200	10	33	NbD049767.1	NbD049767.1	2282
17.4895	17.2676	17.0634	17.7416	17.5419	17.8188				-1	5	5	5	13.8	13.8	13.8	76.925	0	73.193	3691800	30	35	NbD049796.1;NbD027995.1;NbD031381.2	NbD049796.1;NbD027995.1	2283
NaN	NaN	NaN	19.9046	19.7819	19.9087				-1	10	2	2	13.4	2.2	2.2	80.276	0	189.18	8228800	32	14	NbD049849.1	NbD049849.1	2285
17.165	16.9132	17.3603	16.8841	16.4675	NaN				-1	17	3	1	34.4	7.5	3	73.362	0	78.704	1580400	30	18	NbD049851.1;NbD050395.1;NbE03060355.1	NbD049851.1;NbD050395.1;NbE03060355.1	2286
15.0363	15.3969	15.2289	15.054	15.1591	15.1777				-1	9	9	6	46.4	46.4	21.4	32.791	0	157.09	1163500	15	32	NbD049880.1	NbD049880.1	2288
NaN	NaN	NaN	17.2342	17.1396	17.1713				-1	5	5	2	11	11	4.1	77.8	0	124.27	2015900	36	26	NbD050098.1;NbE44070733.1	NbD050098.1;NbE44070733.1	2290
17.834	18.0041	18.2497	18.2525	18.2451	18.3939				-1	20	20	19	38.6	38.6	37.6	56.848	0	323.31	12215000	27	105	NbD050145.1	NbD050145.1	2291
16.902	17.2161	17.2262	NaN	NaN	NaN				-1	41	7	5	42.2	10.4	8	80.189	0	101.86	1699900	34	26	NbE05065370.1;NbD050231.1;NbD013054.1;NbD022473.1	NbE05065370.1;NbD050231.1	2296
16.2225	16.3972	NaN	16.1102	NaN	NaN				-1	7	3	3	22.3	8.4	8.4	34.735	0	72.63	943580	13	15	NbD050294.1;NbE03053620.1;NbE44069546.1	NbD050294.1;NbE03053620.1;NbE44069546.1	2297
NaN	NaN	NaN	15.3617	15.6475	15.354				-1	4	4	3	14.2	14.2	13.6	51.494	0	49.081	477100	25	12	NbE05065988.1;NbD050298.1	NbE05065988.1;NbD050298.1	2298
17.4186	16.9788	17.8039	17.0859	17.4086	17.1625				-1	4	4	4	10.4	10.4	10.4	55.721	0	49.729	3308700	30	34	NbD050336.1;NbD053006.1	NbD050336.1;NbD053006.1	2301
20.6992	20.7491	20.89	21.6241	21.4748	21.5556				-1	12	12	3	19.1	19.1	6.3	80.392	0	323.31	33290000	32	67	NbD050393.1	NbD050393.1	2303
18.2781	18.3482	17.9037	17.9462	18.1719	18.113				-1	17	17	16	34.2	34.2	34.2	67.474	0	299.72	12884000	32	108	NbD050557.1;NbE05066115.1;NbD026369.1	NbD050557.1	2310
16.6865	16.7326	16.518	16.0949	16.5807	16.5522				-1	7	7	7	13.6	13.6	13.6	95.707	0	190.23	2437800	45	46	NbE03054765.1;NbD050650.1;NbD018527.1;NbE05066183.1	NbE03054765.1;NbD050650.1;NbD018527.1	2315
15.4446	NaN	15.4375	14.9877	15.1383	15.252				-1	3	3	3	11.1	11.1	11.1	33.471	0	28.167	775290	18	18	NbD050651.1	NbD050651.1	2316
16.965	17.4237	17.2641	17.9503	17.9566	17.8598				-1	9	9	9	21.2	21.2	21.2	55.66	0	170.58	4889300	24	49	NbD050769.1;NbD038877.1	NbD050769.1;NbD038877.1	2318
15.8603	15.9771	17.0786	15.5974	16.0534	NaN				-1	4	4	4	13.5	13.5	13.5	54.743	0	27.527	928130	29	22	NbE03054927.1;NbD050829.1	NbE03054927.1;NbD050829.1	2321
NaN	NaN	NaN	15.5296	16.0258	15.8484				-1	3	3	1	31.8	31.8	12.2	16.464	0	28.272	964610	7	20	NbD050869.1	NbD050869.1	2322
15.849	16.0107	15.7327	NaN	15.1277	15.2473				-1	2	2	2	20.4	20.4	20.4	17.28	0	52.554	957720	11	18	NbD050892.1	NbD050892.1	2323
16.3508	16.2874	16.3869	15.6512	15.7235	15.5547				-1	9	9	1	39.3	39.3	7.3	29.416	0	86.831	2377900	13	63	NbD050929.1	NbD050929.1	2324
17.6624	17.9297	17.9613	17.3963	17.2775	17.4486				-1	3	3	3	13.5	13.5	13.5	35.68	0	44.869	2033100	13	17	NbD051097.1;NbE03061143.1;NbD035229.1	NbD051097.1;NbE03061143.1	2331
16.432	16.4055	16.1888	16.4009	16.4506	16.5882				-1	5	5	2	9.6	9.6	5.2	88.844	0	83.507	2519700	38	45	NbD051101.1	NbD051101.1	2332
15.4154	15.6266	15.3549	16.4279	16.2032	16.3494				-1	13	11	6	20.7	17.8	11.1	84.235	0	112.51	2722800	49	50	NbD051185.1	NbD051185.1	2338
18.4305	18.4999	18.689	NaN	NaN	NaN				-1	2	2	2	6.5	6.5	6.5	18.057	0	20.3	1468600	8	8	NbD053112.1;NbD051206.1	NbD053112.1;NbD051206.1	2339
18.0246	18.0541	17.7666	17.8201	17.8848	17.9849				-1	17	17	2	33.3	33.3	3.9	67.294	0	304.47	10826000	33	120	NbD051263.1	NbD051263.1	2340
NaN	NaN	NaN	16.642	16.5946	16.5681				-1	4	4	4	5.7	5.7	5.7	118.64	0	47.826	1606200	61	24	NbD051382.1	NbD051382.1	2341
21.1475	21.1659	21.0477	20.54	20.6987	20.8067				-1	11	11	11	26.4	26.4	26.4	41.869	0	196.18	36631000	20	159	NbD051503.1;NbD047176.1	NbD051503.1	2345
NaN	NaN	NaN	15.2485	15.0928	15.291				-1	2	2	2	8.8	8.8	8.8	16.944	0	16.36	937990	6	19	NbD051574.1	NbD051574.1	2347
NaN	14.9708	15.7228	NaN	16.8174	NaN				-1	5	2	2	36.3	26.3	26.3	27.245	0	33.886	929890	14	14	NbD051624.1	NbD051624.1	2349
NaN	NaN	NaN	16.6426	16.5935	15.2796				-1	2	2	2	13.9	13.9	13.9	30.328	0	16.102	689010	15	10	NbD051666.1	NbD051666.1	2351
18.1037	18.4842	18.1312	17.3682	17.8523	17.6526				-1	10	5	4	47.2	33	28.3	25.416	0	111.18	3125400	12	23	NbD051708.1;NbD017487.1	NbD051708.1;NbD017487.1	2353
15.6255	NaN	NaN	NaN	15.6137	15.4206				-1	6	3	3	40.2	26.9	26.9	27.785	0	27.489	869870	10	19	NbD052075.1	NbD052075.1	2365
NaN	NaN	16.8854	17.5123	17.5208	16.504				-1	6	2	2	66.1	23.2	23.2	12.387	0	56.197	1562500	8	16	NbD052106.1	NbD052106.1	2367
19.0248	18.6445	18.7613	18.7187	18.5122	18.454				-1	19	6	6	78.3	43.7	43.7	35.896	0	323.31	9709400	13	59	NbD052122.1	NbD052122.1	2369
NaN	NaN	NaN	15.1892	15.3097	15.4234				-1	4	4	4	7.1	7.1	7.1	104.36	0	27.741	791240	47	21	NbD052329.1;NbE44071763.1;NbD050814.1	NbD052329.1;NbE44071763.1;NbD050814.1	2373
16.5187	NaN	NaN	NaN	16.7105	16.7563				-1	3	2	2	7.2	5	5	67.538	0	73.649	1883500	31	18	NbD052374.1	NbD052374.1	2375
15.2518	15.7217	15.0382	15.2237	15.0501	15.2238				-1	4	4	2	20	20	13.6	24.49	0	36.653	860000	11	26	NbD052403.1	NbD052403.1	2377
17.2109	17.1848	17.2984	18.003	18.1336	17.9751				-1	27	14	7	29.7	21.5	10.6	110.33	0	191.96	8487000	57	120	NbD052482.1	NbD052482.1	2380
17.5661	17.3368	17.3584	17.432	17.4743	17.6075				-1	9	9	2	23.2	23.2	6.2	37.342	0	129.32	5264700	17	63	NbD052515.1	NbD052515.1	2383
15.7848	15.7282	15.6296	NaN	15.3746	NaN				-1	7	7	7	10.2	10.2	10.2	108.42	0	48.884	853620	48	27	NbE03057219.1;NbD052748.1	NbE03057219.1;NbD052748.1	2388
17.0133	17.12	16.5897	15.724	15.7988	15.813				-1	3	3	3	42.7	42.7	42.7	10.078	0	36.377	1683500	6	26	NbD052940.1;NbD016942.1	NbD052940.1;NbD016942.1	2393
NaN	NaN	NaN	17.2347	17.2332	17.263				-1	5	5	5	11.7	11.7	11.7	38.699	0	284.46	4053500	16	43	NbD053078.1	NbD053078.1	2396
NaN	NaN	NaN	15.961	16.0163	16.0154				-1	1	1	1	6.5	6.5	6.5	21.209	0.0014178	7.7174	511560	9	12	NbE03060082.1;NbD053145.1	NbE03060082.1;NbD053145.1	2397
17.276	17.1915	17.1099	17.2479	17.1469	17.2353				-1	10	10	10	31.6	31.6	31.6	48.016	0	203.1	5697200	26	90	NbD053263.1;NbD034239.1;NbE44069446.1	NbD053263.1;NbD034239.1;NbE44069446.1	2399
15.3081	15.3508	14.8833	15.5132	15.5434	15.6594				-1	6	6	6	20	20	20	50.09	0	104.87	1230900	26	36	NbE03053650.1;NbD046573.1;NbD036111.1;NbE03053664.1;NbE44072031.1;NbD028858.1	NbE03053650.1;NbD046573.1;NbD036111.1	2403
NaN	15.3354	15.5058	15.8649	16.0239	15.8409				-1	7	7	7	8.5	8.5	8.5	108.61	0	53.171	1441200	53	32	NbE03053722.1;NbD025568.1;NbD007133.1;NbD021260.1;NbD019145.1;NbD010272.1	NbE03053722.1;NbD025568.1;NbD007133.1	2404
NaN	NaN	NaN	15.2404	15.2433	15.2814				-1	8	4	3	10	5.4	4.5	166.75	0	38.156	393730	74	13	NbE03053906.1;NbD052818.1	NbE03053906.1;NbD052818.1	2406
NaN	NaN	NaN	18.0279	17.9751	17.8797				-1	8	2	2	34.2	12.6	12.6	29.043	0	85.667	2701700	17	12	NbE03054032.1	NbE03054032.1	2408
18.0429	18.121	18.4402	18.9611	18.8306	18.9062				-1	13	13	1	37.2	37.2	3.9	67.232	0	285.86	7962400	39	77	NbE03054039.1;NbE05062950.1;NbD034643.1	NbE03054039.1;NbE05062950.1;NbD034643.1	2409
18.1552	18.0787	17.6093	16.8012	17.206	17.0871				-1	4	4	3	13.6	13.6	10.4	57.695	0	120.32	4995100	30	57	NbE03054249.1;NbD025603.1;NbD018797.1;NbD003983.1;NbE03060119.1	NbE03054249.1;NbD025603.1;NbD018797.1;NbD003983.1	2411
16.6154	16.8867	17.3405	17.1833	17.1419	17.141				-1	12	9	9	22.6	13.9	13.9	54.518	0	259.2	3408100	23	50	NbE03054430.1	NbE03054430.1	2412
17.654	17.6646	17.7059	NaN	NaN	NaN				-1	15	5	5	28.1	12.9	12.9	84.93	0	48.457	1724300	36	20	NbE03054496.1;NbE44072942.1	NbE03054496.1;NbE44072942.1	2413
17.3377	17.3773	17.0032	17.621	17.808	17.7468				-1	11	11	1	23.1	23.1	3.5	71.966	0	226.36	9508900	31	106	NbE03054944.1	NbE03054944.1	2415
NaN	NaN	NaN	16.0757	16.0377	16.1603				-1	7	7	3	9.1	9.1	4.7	195.03	0	89.321	1206900	82	28	NbE03054981.1;NbD045669.1	NbE03054981.1;NbD045669.1	2417
18.5137	18.7359	18.3275	18.3717	18.2681	18.5067				-1	37	37	8	47.2	47.2	9.1	69.052	0	323.31	19848000	32	237	NbE03055085.1	NbE03055085.1	2418
NaN	NaN	NaN	16.1763	16.0558	15.7934				-1	14	14	4	13.1	13.1	4.8	171.51	0	151.66	2762500	84	63	NbE03055912.1;NbD008853.1	NbE03055912.1;NbD008853.1	2423
17.4924	17.128	17.5006	18.1058	18.3416	18.3639				-1	12	2	1	26	12.3	7.8	49.336	0	36.109	5474900	25	24	NbE03056103.1;NbD029989.1	NbE03056103.1;NbD029989.1	2425
18.1315	17.9267	18.3363	17.7803	18.0491	18.0843				-1	32	5	5	55.7	6.8	6.8	48.511	0	227.14	7050500	21	51	NbE03056217.1	NbE03056217.1	2426
17.4681	17.6778	NaN	17.3477	NaN	17.3068				-1	12	2	2	27.5	4.7	4.7	41.921	0	65.85	2233600	20	19	NbE03056644.1	NbE03056644.1	2428
NaN	NaN	NaN	16.0113	15.9984	16.0061				-1	12	12	4	16.2	16.2	6	133.21	0	229.69	2117900	62	51	NbE03057383.1	NbE03057383.1	2433
18.4898	18.4435	18.4038	17.8879	18.0182	18.0873				-1	39	10	4	51.4	14.1	3.8	84.524	0	192.81	7853500	41	70	NbE03057400.1	NbE03057400.1	2434
15.7829	15.6382	15.8251	16.5293	16.4081	16.4535				-1	10	10	4	30.3	30.3	10.7	60.122	0	151.51	3214500	27	67	NbE03057934.1;NbD035728.1	NbE03057934.1;NbD035728.1	2438
15.6857	15.4035	NaN	18.6177	18.4652	18.7937				-1	6	6	2	16.8	16.8	8.5	36.586	0	94.475	8373500	16	38	NbE03058149.1;NbD004083.1	NbE03058149.1;NbD004083.1	2439
17.6091	17.605	17.6038	18.4926	18.4181	18.3973				-1	8	8	3	40.3	40.3	17.6	37.605	0	108.98	6780700	21	58	NbE03058749.1	NbE03058749.1	2444
15.8933	15.6479	16.0808	16.8389	16.5311	16.6993				-1	8	8	2	57.9	57.9	17.1	24.061	0	195.65	3522400	12	66	NbE03058793.1;NbD048597.1;NbD044496.1	NbE03058793.1;NbD048597.1	2445
NaN	NaN	NaN	18.1394	17.7219	17.1706				-1	4	4	4	11.6	11.6	11.6	57.353	0	28.296	1896100	29	16	NbE03058813.1;NbD043148.1;NbD034915.1;NbE44072253.1;NbE05067146.1	NbE03058813.1;NbD043148.1;NbD034915.1;NbE44072253.1	2446
18.1453	18.1342	18.3533	18.209	18.1927	18.2338				-1	22	9	3	41	18.3	4.8	41.046	0	224.72	14902000	21	75	NbE03059042.1;NbD021564.1;NbE05066423.1	NbE03059042.1;NbD021564.1;NbE05066423.1	2448
17.7993	17.8644	17.9679	17.5139	17.6671	17.6638				-1	11	11	0	41.9	41.9	0	29.062	0	309.8	11015000	15	108	NbE03059100.1	NbE03059100.1	2450
NaN	NaN	NaN	15.688	15.4851	15.6719				-1	5	5	4	12.1	12.1	12.1	60.535	0	33.351	592310	24	17	NbE03059804.1;NbD015354.1	NbE03059804.1;NbD015354.1	2454
16.4675	16.4761	16.487	16.4555	16.4403	16.4568				-1	5	5	2	33.4	33.4	10	32.082	0	50.298	2423200	19	47	NbE03060011.1	NbE03060011.1	2455
20.4374	20.8287	19.957	19.6993	19.5534	19.6531				-1	8	8	3	27.9	27.9	14.2	41.877	0	323.31	15103000	20	55	NbE03060212.1;NbD022601.1	NbE03060212.1;NbD022601.1	2459
17.9638	18.0423	18.0556	17.7085	17.7382	17.5626				-1	19	19	1	25.5	25.5	1.6	75.319	0	309.75	10349000	36	127	NbE03060232.1	NbE03060232.1	2460
18.8058	19.012	18.9674	17.9405	17.8253	18.1062				-1	25	6	6	59.3	11.1	11.1	42.801	0	57.359	7752200	23	43	NbE03060872.1	NbE03060872.1	2465
14.5792	14.5301	14.1932	NaN	NaN	NaN				-1	3	3	2	6.9	6.9	4.1	72.495	0	21.722	196470	35	13	NbE03061056.1;NbD004999.1	NbE03061056.1;NbD004999.1	2468
20.0242	20.123	19.6795	17.5648	17.2982	NaN				-1	4	4	3	29.9	29.9	25.5	21.05	0	138.12	9707200	8	32	NbE03061400.1;NbD027327.1;NbD031193.1	NbE03061400.1;NbD027327.1;NbD031193.1	2469
18.2461	18.3082	18.2009	17.7677	17.9841	17.8653				-1	24	24	8	54.5	54.5	27.9	50.007	0	323.31	16914000	33	194	NbE03061757.1;NbD034140.1	NbE03061757.1;NbD034140.1	2470
15.4025	15.5995	15.357	NaN	NaN	NaN				-1	4	4	4	27.1	27.1	27.1	20.894	0	42.312	588740	9	18	NbE03061938.1;NbD040681.1;NbD046422.1	NbE03061938.1;NbD040681.1	2472
18.4765	18.5309	18.6553	18.2843	18.403	18.3189				-1	20	20	1	35.7	35.7	5.1	73.096	0	323.31	12878000	37	125	NbE03062045.1	NbE03062045.1	2474
18.0067	17.9996	17.1266	NaN	15.7188	NaN				-1	4	4	4	23.8	23.8	23.8	13.402	0	54.133	2140100	7	27	NbE03062147.1;NbD034667.1;NbD029750.1	NbE03062147.1;NbD034667.1;NbD029750.1	2476
18.5243	18.5858	18.4903	17.6932	17.79	17.7856				-1	3	3	3	20	20	20	19.396	0	80.109	4449500	11	22	NbE03062283.1;NbD000261.1	NbE03062283.1;NbD000261.1	2478
16.0377	16.0147	16.1372	15.0981	15.4253	15.1963				-1	5	5	5	23.5	23.5	23.5	29.561	0	48.339	871730	16	23	NbE05062862.1;NbE44070342.1	NbE05062862.1;NbE44070342.1	2480
NaN	NaN	NaN	16.8958	16.9054	16.953				-1	6	4	0	6.8	4.1	0	130.49	0	59.041	1917700	63	28	NbE44071730.1;NbE05063534.1;NbD051631.1	NbE44071730.1;NbE05063534.1	2482
18.4655	19.2895	NaN	18.3726	NaN	18.4138				-1	4	3	3	46.6	34.5	34.5	12.264	0	27.014	3301300	9	21	NbE05064048.1	NbE05064048.1	2483
19.899	19.4244	19.2237	19.8074	19.8055	19.9731				-1	28	3	0	39.9	5.9	0	65.014	0	71.316	11625000	31	34	NbE05064384.1	NbE05064384.1	2485
17.2635	17.141	17.4032	18.1277	18.3098	18.1336				-1	12	12	1	51.1	51.1	8.3	29.575	0	323.31	7547400	13	89	NbE05064533.1	NbE05064533.1	2486
21.402	21.3938	21.1537	20.3929	20.4344	20.5128				-1	34	34	17	64.2	64.2	44.2	52.865	0	323.31	138870000	23	316	NbE05064989.1;NbD046976.1;NbD001946.1;NbE05065000.1;NbD044043.1;NbD016631.1;NbD052540.1;NbE03053297.1;NbD050537.1;NbD005118.1	NbE05064989.1;NbD046976.1	2490
17.7311	17.9859	17.9108	18.39	18.5454	18.6206				-1	11	11	1	22	22	3.1	56.264	0	323.31	8670100	28	81	NbE05065300.1;NbD006220.1;NbD039184.1	NbE05065300.1;NbD006220.1	2491
19.8678	19.9451	20.0148	20.1342	20.1372	20.1909				-1	27	27	11	47.1	47.1	23.9	43.176	0	323.31	67762000	19	261	NbE44073703.1;NbE05065517.1;NbD052111.1	NbE44073703.1;NbE05065517.1;NbD052111.1	2493
17.0955	16.8481	17.551	18.1537	17.9217	17.8059				-1	6	6	0	26	26	0	26.524	0	87.884	6433900	12	57	NbE05065716.1;NbD052618.1	NbE05065716.1;NbD052618.1	2496
NaN	NaN	NaN	17.9082	17.838	17.783				-1	8	2	2	35	14.5	14.5	24.912	0	66.269	2378500	7	20	NbE05065846.1	NbE05065846.1	2497
18.5482	18.6095	18.7276	19.4193	19.1827	19.2416				-1	7	7	2	22.1	22.1	7.5	68.75	0	99.323	6737900	30	33	NbE05065916.1;NbD019966.1	NbE05065916.1;NbD019966.1	2498
16.4944	16.1642	16.4218	NaN	NaN	14.592				-1	8	8	3	40.1	40.1	15.6	43.697	0	81.528	1274800	22	32	NbE05066068.1;NbD015466.1	NbE05066068.1;NbD015466.1	2501
NaN	NaN	NaN	15.5541	15.5899	15.5514				-1	9	5	2	12.6	6.6	2.3	84.109	0	65.52	731850	50	15	NbE05066071.1	NbE05066071.1	2502
NaN	NaN	NaN	14.9343	15.047	14.8649				-1	3	3	2	4	4	3.1	121.3	0	84.024	516170	49	13	NbE05066177.1;NbD049095.1;NbD006640.1	NbE05066177.1;NbD049095.1;NbD006640.1	2503
18.9177	19.084	18.783	17.8386	18.0948	18.1614				-1	30	30	4	26.6	26.6	4.9	177.14	0	323.31	20573000	78	202	NbE05068323.1	NbE05068323.1	2511
15.3874	15.5104	NaN	16.0446	16.0891	16.239				-1	3	3	2	15.2	15.2	9.9	34.289	0	27.502	1530400	18	25	NbE05068523.1;NbD006562.1	NbE05068523.1	2512
18.4893	18.4573	18.3748	18.3354	18.4901	18.4835				-1	20	6	1	29.2	13.8	5.3	48.003	0	257.78	8177200	29	74	NbE05068808.1;NbD017417.1	NbE05068808.1;NbD017417.1	2514
17.9688	17.8515	17.942	18.1823	18.2158	18.1851				-1	25	25	8	40.6	40.6	17	72.023	0	323.31	18699000	32	184	NbE44069574.1	NbE44069574.1	2517
NaN	NaN	NaN	16.5732	16.5597	16.6889				-1	17	17	17	40.9	40.9	40.9	62.987	0	287.8	2735600	29	55	NbE44070458.1;NbD048553.1	NbE44070458.1;NbD048553.1	2520
16.8236	16.8796	16.321	17.0739	16.9701	17.1792				-1	10	10	6	39.5	39.5	25.4	34.86	0	96.846	3816500	19	47	NbE44070753.1;NbE03060292.1	NbE44070753.1;NbE03060292.1	2521
15.4414	NaN	15.4715	18.0478	17.6983	17.8671				-1	10	10	10	40.7	40.7	40.7	50.008	0	211.96	4144100	30	46	NbE44070901.1;NbD006163.1	NbE44070901.1;NbD006163.1	2523
15.693	15.737	16.0916	19.5614	19.6264	19.5494				-1	17	17	0	12.6	12.6	0	156.74	0	323.31	12930000	68	78	NbE44070942.1	NbE44070942.1	2524
NaN	NaN	NaN	14.7582	14.6001	14.659				-1	1	1	1	8	8	8	41.261	0	20.668	274540	16	15	NbE44071261.1	NbE44071261.1	2525
18.1563	18.1575	18.5625	18.2002	17.9898	18.1175				-1	7	7	5	16.8	16.8	11.7	64.179	0	119.25	4966400	34	41	NbE44072147.1;NbD020970.1;NbD052760.1	NbE44072147.1;NbD020970.1;NbD052760.1	2527
15.7821	15.4256	15.1962	19.0869	19.3489	19.3452				-1	63	16	0	66.4	21.9	0	107.76	0	323.31	17913000	57	112	NbE44072342.1	NbE44072342.1	2529
NaN	NaN	16.1449	15.7262	15.7054	15.853				-1	7	5	2	32.5	23.6	4.1	31.331	0	40.471	717190	17	20	NbE44072430.1;NbD033376.1	NbE44072430.1;NbD033376.1	2530
17.0601	17.0581	15.7487	16.373	16.5318	16.1516				-1	10	10	0	17.8	17.8	0	78.77	0	141.73	2917900	35	43	NbE44072485.1	NbE44072485.1	2531
18.5672	18.4023	18.4489	18.5378	18.0785	18.2654				-1	14	14	7	34.9	34.9	18.6	55.772	0	323.31	16889000	23	114	NbE44072729.1;NbD014991.1	NbE44072729.1	2532
NaN	NaN	NaN	17.3994	17.4588	17.4973				-1	31	31	17	27.9	27.9	18	195.57	0	323.31	8964700	88	125	NbE44073682.1;NbE03058429.1;NbD010900.1	NbE44073682.1;NbE03058429.1;NbD010900.1	2537
NaN	NaN	NaN	16.3046	16.4003	16.3092				-1	10	3	0	30.6	10.6	0	66.927	0	36.179	745250	32	18	NbE44073928.1;NbE44073927.1	NbE44073928.1;NbE44073927.1	2540
21.2177	21.2659	21.0525	19.7425	19.7596	19.7061				-1	16	16	4	33.6	33.6	12.2	91.696	0	321.62	24081000	39	115	NbE44074027.1;NbE03060606.1	NbE44074027.1;NbE03060606.1	2541
NaN	NaN	NaN	17.4172	17.1589	17.1941				-1	10	4	4	7.1	3.8	3.8	143.53	0	41.189	1438600	55	16	NbE44074038.1;NbE05068077.1;NbE44074039.1;NbD003923.1	NbE44074038.1;NbE05068077.1;NbE44074039.1;NbD003923.1	2542
16.0105	16.0045	16.0737	15.8498	16.0251	15.7017				-1	9	9	2	21.6	21.6	3.2	50.285	0	102.2	1315800	25	33	NbE44074279.1	NbE44074279.1	2543
17.3601	17.4849	17.6989	16.9926	17.3673	17.7389				-1	5	5	5	26.3	26.3	26.3	21.907	0	75.377	4478900	9	35	NbE44074367.1;NbE05068647.1;NbD035172.1	NbE44074367.1;NbE05068647.1;NbD035172.1	2544
24.5589	24.568	24.648	21.9327	21.945	21.9596				-1	69	69	69	97.5	97.5	97.5	53.8	0	323.31	3913500000	26	4592	PafA|BAIT|BAIT_LABEL	PafA|BAIT|BAIT_LABEL	2546

## Sheet: only detected in NtRACK1
Proteins only detected in samples from NbRACK1-PafA
GFP_rep1	GFP_rep2	GFP_rep3	NtRACK_rep1	NtRACK_rep2	NtRACK_rep3	Count
			+	+	+	202
Protein IDs	Majority protein IDs	id
atRACK	atRACK	0
NbE05064168.1;NbD000166.1;NbE05064169.1	NbE05064168.1;NbD000166.1	14
NbE03059573.1;NbD000597.1	NbE03059573.1;NbD000597.1	26
NbD000771.1;NbD023745.1	NbD000771.1;NbD023745.1	39
NbD028652.1;NbD022971.1;NbD001068.1;NbE03061671.1	NbD028652.1;NbD022971.1;NbD001068.1;NbE03061671.1	56
NbD001333.1;NbD007942.1;NbE03060837.1;NbE03062469.1	NbD001333.1;NbD007942.1;NbE03060837.1;NbE03062469.1	71
NbD001415.1;NbE05065485.1;NbD015542.1	NbD001415.1;NbE05065485.1	76
NbD002190.1;NbD013740.1;NbE03056937.1	NbD002190.1;NbD013740.1;NbE03056937.1	121
NbD002297.1;NbE03053482.1	NbD002297.1;NbE03053482.1	128
NbD002901.1	NbD002901.1	154
NbE03057099.1;NbD002939.1	NbE03057099.1;NbD002939.1	156
NbD002999.1	NbD002999.1	161
NbD003525.1;NbD013869.1;NbD004501.1;NbD010443.1	NbD003525.1;NbD013869.1;NbD004501.1;NbD010443.1	192
NbD013144.1;NbD003598.1;NbD049416.1;NbD046368.1	NbD013144.1;NbD003598.1;NbD049416.1;NbD046368.1	197
NbD033301.1;NbD003611.1	NbD033301.1;NbD003611.1	202
NbD035446.1;NbD004085.1	NbD035446.1;NbD004085.1	231
NbE05068122.1;NbD045394.1;NbD004375.1;NbD010161.1;NbD035088.1;NbE44073814.1	NbE05068122.1;NbD045394.1;NbD004375.1	246
NbD004530.1;NbD017403.1	NbD004530.1;NbD017403.1	256
NbD051686.1;NbD029155.1;NbD012968.1;NbD006401.1;NbD004560.1;NbD000411.1	NbD051686.1;NbD029155.1;NbD012968.1;NbD006401.1;NbD004560.1;NbD000411.1	257
NbD040735.1;NbE05064849.1;NbD004589.1	NbD040735.1;NbE05064849.1;NbD004589.1	259
NbD004677.1;NbE03062168.1;NbD016829.1	NbD004677.1;NbE03062168.1;NbD016829.1	266
NbD004937.1	NbD004937.1	280
NbD005048.1;NbD001933.1	NbD005048.1	286
NbD048690.1;NbD005381.1;NbD052432.1;NbD025616.1;NbE03054751.1;NbE03061170.1;NbD024878.1;NbD015058.1;NbD005581.1	NbD048690.1;NbD005381.1;NbD052432.1;NbD025616.1;NbE03054751.1;NbE03061170.1;NbD024878.1;NbD015058.1;NbD005581.1	313
NbD005408.1	NbD005408.1	318
NbD005507.1;NbE03060838.1;NbD018821.1	NbD005507.1;NbE03060838.1;NbD018821.1	325
NbD005717.1	NbD005717.1	335
NbD005751.1	NbD005751.1	338
NbD046070.1;NbD013798.1;NbD010028.1;NbD005951.1;NbD041065.1	NbD046070.1;NbD013798.1;NbD010028.1;NbD005951.1;NbD041065.1	351
NbD010894.1;NbD006133.1	NbD010894.1;NbD006133.1	358
NbD031529.1;NbE05068423.1;NbD006299.1;NbE03057916.1;NbD020517.1	NbD031529.1;NbE05068423.1;NbD006299.1;NbE03057916.1;NbD020517.1	365
NbE03053793.1;NbD050511.1;NbD006793.1	NbE03053793.1;NbD050511.1;NbD006793.1	395
NbE03056006.1;NbD007021.1	NbE03056006.1;NbD007021.1	406
NbD023087.1;NbD007725.1;NbE05063828.1;NbD045001.1;NbD043780.1	NbD023087.1;NbD007725.1;NbE05063828.1;NbD045001.1;NbD043780.1	444
NbE05067263.1;NbD011152.1;NbD007847.1	NbE05067263.1;NbD011152.1;NbD007847.1	451
NbD007854.1;NbD027183.1	NbD007854.1;NbD027183.1	453
NbD031784.1;NbD028515.1;NbD010643.1;NbD010400.1;NbD007887.1;NbD042990.1	NbD031784.1;NbD028515.1;NbD010643.1;NbD010400.1;NbD007887.1;NbD042990.1	456
NbE05065991.1;NbD008319.1	NbE05065991.1;NbD008319.1	477
NbD008377.1;NbE05065732.1	NbD008377.1;NbE05065732.1	481
NbD008604.1;NbE05064919.1;NbD023032.1	NbD008604.1;NbE05064919.1;NbD023032.1	500
NbE05064534.1;NbD008707.1	NbE05064534.1;NbD008707.1	504
NbD009316.1	NbD009316.1	537
NbD009566.1;NbE05064499.1;NbD039690.1	NbD009566.1;NbE05064499.1;NbD039690.1	557
NbD010151.1;NbD009589.1;NbD009588.1	NbD010151.1;NbD009589.1;NbD009588.1	559
NbD009891.1;NbE44071173.1;NbD005399.1;NbE03060874.1	NbD009891.1;NbE44071173.1;NbD005399.1;NbE03060874.1	573
NbD010243.1;NbE05064396.1;NbD007578.1	NbD010243.1;NbE05064396.1	586
NbD011591.1;NbD010426.1	NbD011591.1;NbD010426.1	593
NbD010517.1	NbD010517.1	597
NbD010600.1;NbD035995.1;NbE44072225.1	NbD010600.1;NbD035995.1;NbE44072225.1	603
NbD010749.1;NbE44073505.1	NbD010749.1;NbE44073505.1	608
NbD038435.1;NbD010962.1	NbD038435.1;NbD010962.1	618
NbD011036.1;NbD002701.1	NbD011036.1;NbD002701.1	625
NbD011646.1	NbD011646.1	664
NbD011790.1;NbD045030.1	NbD011790.1	673
NbD011824.1;NbD051455.1	NbD011824.1;NbD051455.1	675
NbD011841.1;NbE05067041.1;NbD039704.1;NbE44073793.1	NbD011841.1;NbE05067041.1;NbD039704.1;NbE44073793.1	677
NbD039705.1;NbD011842.1	NbD039705.1;NbD011842.1	678
NbD042901.1;NbD036606.1;NbD034752.1;NbD012039.1	NbD042901.1;NbD036606.1;NbD034752.1;NbD012039.1	683
NbE44073470.1;NbE03056198.1;NbD012184.1;NbD043289.1	NbE44073470.1;NbE03056198.1;NbD012184.1;NbD043289.1	691
NbD039165.1;NbD012404.1	NbD039165.1;NbD012404.1	704
NbE05068742.1;NbE44073742.1;NbD012627.1;NbE05068326.1;NbD011403.1	NbE05068742.1;NbE44073742.1;NbD012627.1;NbE05068326.1;NbD011403.1	716
NbD012970.1;NbD038795.1;NbD004558.1	NbD012970.1;NbD038795.1;NbD004558.1	736
NbD025141.1;NbD013327.1	NbD025141.1;NbD013327.1	752
NbD013541.1;NbE03057304.1	NbD013541.1;NbE03057304.1	762
NbD014013.1	NbD014013.1	786
NbD014326.1	NbD014326.1	811
NbE03060284.1;NbD015387.1	NbE03060284.1;NbD015387.1	862
NbD015749.1	NbD015749.1	884
NbD015816.1;NbE44073706.1	NbD015816.1;NbE44073706.1	891
NbD015928.1	NbD015928.1	893
NbD016046.1	NbD016046.1	897
NbD016565.1;NbE03058186.1;NbD051974.1;NbD018483.1;NbD015852.1;NbD006632.1;NbE44069586.1	NbD016565.1;NbE03058186.1;NbD051974.1;NbD018483.1;NbD015852.1;NbD006632.1;NbE44069586.1	923
NbD043694.1;NbD041460.1;NbD016868.1;NbD048288.1;NbD029946.1	NbD043694.1;NbD041460.1;NbD016868.1;NbD048288.1;NbD029946.1	933
NbD016943.1;NbD031589.1;NbD037388.1;NbD036571.1;NbD023451.1;NbD027710.1	NbD016943.1;NbD031589.1	941
NbD017089.1;NbE03056336.1;NbD007127.1;NbD005240.1;NbD037627.1;NbD033219.1	NbD017089.1;NbE03056336.1;NbD007127.1;NbD005240.1;NbD037627.1;NbD033219.1	947
NbD017641.1;NbD047529.1;NbE44069423.1	NbD017641.1;NbD047529.1;NbE44069423.1	970
NbD018100.1;NbD032229.1	NbD018100.1	997
NbD050817.1;NbD040573.1;NbD019471.1;NbD018428.1;NbE05065820.1;NbD034970.1;NbE44073433.1;NbE03060055.1;NbD020181.1;NbD020182.1	NbD050817.1;NbD040573.1;NbD019471.1;NbD018428.1;NbE05065820.1;NbD034970.1;NbE44073433.1;NbE03060055.1;NbD020181.1	1013
NbD044787.1;NbD019389.1;NbD031076.1;NbD000101.1;NbD000396.1	NbD044787.1;NbD019389.1;NbD031076.1;NbD000101.1	1063
NbD040743.1;NbD048058.1;NbD042343.1;NbD019568.1;NbD040438.1	NbD040743.1;NbD048058.1;NbD042343.1;NbD019568.1;NbD040438.1	1073
NbD019731.1;NbE05064266.1	NbD019731.1;NbE05064266.1	1080
NbD020579.1;NbE03058258.1	NbD020579.1;NbE03058258.1	1107
NbD020614.1;NbD049964.1	NbD020614.1;NbD049964.1	1108
NbD020850.1;NbD025259.1	NbD020850.1	1118
NbD020921.1;NbE05064881.1;NbD045575.1	NbD020921.1;NbE05064881.1;NbD045575.1	1123
NbD042159.1;NbD021396.1	NbD042159.1;NbD021396.1	1150
NbD021400.2;NbD021400.1;NbD021399.1	NbD021400.2;NbD021400.1;NbD021399.1	1151
NbE05065807.1;NbD048646.1;NbD021605.1	NbE05065807.1;NbD048646.1;NbD021605.1	1162
NbD021764.1;NbD038110.1;NbE44070240.1	NbD021764.1;NbD038110.1;NbE44070240.1	1172
NbD022250.1;NbD044861.1	NbD022250.1;NbD044861.1	1189
NbE03061744.1;NbD022267.1;NbD013111.1;NbD019191.1;NbE05067764.1;NbD047394.1;NbD004905.1	NbE03061744.1;NbD022267.1;NbD013111.1	1191
NbD022309.1;NbE03061767.1;NbD018068.1;NbE44071766.1	NbD022309.1;NbE03061767.1;NbD018068.1;NbE44071766.1	1192
NbD022585.1;NbD014268.1;NbD029831.1;NbD007551.1;NbE44070061.1;NbD011520.1;NbD022584.1;NbE03054593.1	NbD022585.1;NbD014268.1;NbD029831.1;NbD007551.1;NbE44070061.1;NbD011520.1	1204
NbD023007.1	NbD023007.1	1222
NbD023423.1	NbD023423.1	1237
NbD023502.1	NbD023502.1	1239
NbD023842.1	NbD023842.1	1253
NbE44069792.1;NbE44069791.1;NbD023878.1;NbD016350.1	NbE44069792.1;NbE44069791.1;NbD023878.1;NbD016350.1	1255
NbD023977.1;NbE03053520.1	NbD023977.1;NbE03053520.1	1262
NbD024519.1;NbE05066552.1;NbE44069253.1;NbE05068112.1;NbD051729.1	NbD024519.1;NbE05066552.1;NbE44069253.1;NbE05068112.1;NbD051729.1	1282
NbD024559.1	NbD024559.1	1284
NbE05067310.1;NbD024731.1	NbE05067310.1;NbD024731.1	1286
NbE03056038.1;NbD024834.1	NbE03056038.1;NbD024834.1	1295
NbD024919.1;NbD046098.1	NbD024919.1;NbD046098.1	1298
NbE03060139.1;NbD025104.1	NbE03060139.1;NbD025104.1	1311
NbE03056528.1;NbD025452.1	NbE03056528.1;NbD025452.1	1327
NbE05068254.1;NbD025457.1	NbE05068254.1;NbD025457.1	1328
NbD025461.1;NbD013547.1	NbD025461.1;NbD013547.1	1329
NbD025469.1;NbD024722.1;NbD023955.1;NbD011424.1;NbD041917.1;NbE03058825.1;NbE05065416.1	NbD025469.1;NbD024722.1;NbD023955.1;NbD011424.1;NbD041917.1;NbE03058825.1	1330
NbD025748.1;NbE03058586.1	NbD025748.1;NbE03058586.1	1345
NbD025793.1;NbD052698.1	NbD025793.1;NbD052698.1	1350
NbD025909.1	NbD025909.1	1355
NbE03055346.1;NbD025915.1	NbE03055346.1;NbD025915.1	1356
NbE03057820.1;NbD026192.1;NbE44072642.1;NbD031698.1	NbE03057820.1;NbD026192.1;NbE44072642.1;NbD031698.1	1367
NbD026305.1	NbD026305.1	1370
NbE05063437.1;NbD026434.1	NbE05063437.1;NbD026434.1	1375
NbD026839.1;NbE05063410.1;NbE03056560.1	NbD026839.1;NbE05063410.1;NbE03056560.1	1389
NbD027300.1	NbD027300.1	1413
NbD027867.1;NbE03058222.1;NbD031858.1;NbE03056429.1	NbD027867.1;NbE03058222.1;NbD031858.1	1439
NbD028335.1	NbD028335.1	1461
NbD028502.1;NbD049173.1;NbD006402.1;NbD000786.1;NbD011065.1	NbD028502.1;NbD049173.1;NbD006402.1;NbD000786.1	1470
NbD029200.1;NbD028565.1	NbD029200.1;NbD028565.1	1474
NbD042866.1;NbD028787.1;NbE44072235.1;NbD008205.1	NbD042866.1;NbD028787.1;NbE44072235.1;NbD008205.1	1482
NbD029126.1;NbE03060847.1;NbE44070740.1	NbD029126.1;NbE03060847.1;NbE44070740.1	1498
NbD029299.1;NbE05063025.1;NbD010804.1;NbD010758.1;NbD022905.1;NbE05066957.1;NbD044351.1;NbD026178.1	NbD029299.1;NbE05063025.1;NbD010804.1;NbD010758.1;NbD022905.1;NbE05066957.1;NbD044351.1;NbD026178.1	1511
NbD030175.1;NbD028623.1	NbD030175.1	1544
NbE03060074.1;NbD030848.1	NbE03060074.1;NbD030848.1	1567
NbD030932.1	NbD030932.1	1573
NbD038896.1;NbD031906.1	NbD038896.1;NbD031906.1	1601
NbD032286.1	NbD032286.1	1615
NbE03055157.1;NbD032607.1;NbD040865.1;NbE44073360.1;NbE03057648.1;NbD041240.1;NbE03055022.1	NbE03055157.1;NbD032607.1;NbD040865.1;NbE44073360.1;NbE03057648.1	1636
NbD032988.1;NbD032740.1;NbD009839.1;NbD001604.1	NbD032988.1;NbD032740.1;NbD009839.1;NbD001604.1	1649
NbD033194.1;NbE05065869.1;NbD013920.1	NbD033194.1;NbE05065869.1;NbD013920.1	1666
NbD033544.1	NbD033544.1	1683
NbD034157.1;NbE03056812.1	NbD034157.1;NbE03056812.1	1704
NbE03060478.1;NbD034991.1	NbE03060478.1;NbD034991.1	1739
NbE44074289.1;NbD035431.1;NbE05063596.1;NbE44071961.1;NbD003740.1	NbE44074289.1;NbD035431.1;NbE05063596.1;NbE44071961.1;NbD003740.1	1753
NbD036033.1	NbD036033.1	1774
NbD036077.1;NbE03059486.1;NbD049545.1	NbD036077.1;NbE03059486.1;NbD049545.1	1776
NbD036321.1	NbD036321.1	1781
NbD050542.1;NbD036339.1	NbD050542.1;NbD036339.1	1782
NbD036440.1;NbD046539.1	NbD036440.1;NbD046539.1	1789
NbD037085.1	NbD037085.1	1818
NbD040415.1;NbD038247.1;NbE44069407.1;NbE03058410.1;NbE03054217.1;NbD043709.1	NbD040415.1;NbD038247.1;NbE44069407.1;NbE03058410.1;NbE03054217.1;NbD043709.1	1861
NbE44069535.1;NbD038800.1	NbE44069535.1;NbD038800.1	1880
NbD039406.1;NbE44071008.1	NbD039406.1;NbE44071008.1	1905
NbD039597.1	NbD039597.1	1914
NbD039722.1;NbE05063486.1;NbD030447.1	NbD039722.1;NbE05063486.1;NbD030447.1	1922
NbE05066320.1;NbD046680.1;NbD039935.1	NbE05066320.1;NbD046680.1;NbD039935.1	1929
NbE05065923.1;NbD040967.1	NbE05065923.1;NbD040967.1	1956
NbE05066340.1;NbD041659.1	NbE05066340.1;NbD041659.1	1979
NbD042103.1;NbD008222.1	NbD042103.1	1991
[truncated: 50 more rows]

## Sheet: imputation and t-test NtRACK1
a two-sided t-test for comparison between samples from NbRACK1-PafA and GFP-PafA, with corrected false positive by permutation-based FDR calculation using thresholds FDR = 0.05 and S0 = 1.
[truncated: 403 more rows]

[truncated: 4 more sheets: filter, overlap RACK ID and seq, best blast hits in Arabidopsis, Go molecular function]
