# Supplementary material for: Pupylation-based proximity labelling reveals regulatory factors in cellulose biosynthesis in Arabidopsis
Source: Research Square preprint supplement (doi:10.21203/rs.3.rs-3849556/v1), 2024-09-30
Supplement: Supplementary file 2 [file 98c8aebf86b1713fde2039b4.xlsx]

## Sheet: CC1 and LTI6B LFQ
Log2 transformed LFQ of proteins detected in samples from PafA-CC1 or PafA-LTI6B
LFQ intensity Lti6B_rep1	LFQ intensity CC1_rep1	LFQ intensity Lti6B_rep2	LFQ intensity CC1_rep2	LFQ intensity Lti6B_rep3	LFQ intensity CC1_rep3	C: Only identified by site	C: Reverse	C: Potential contaminant	C: Taxonomy IDs	N: Peptides	N: Razor + unique peptides	N: Unique peptides	N: Sequence coverage [%]	N: Unique + razor sequence coverage [%]	N: Unique sequence coverage [%]	N: Mol. weight [kDa]	N: Q-value	N: Score	N: Intensity	N: iBAQ peptides	N: MS/MS count	T: Protein IDs	T: Majority protein IDs	T: id
NaN	22.3425	NaN	22.2367	NaN	22.3573				-1	10	10	9	45	45	37.4	37.201	0	259.69	35674000	16	36	CC1;NbE03054282.1;NbD031486.1;NbD007210.1;NbD029431.1;NbD010955.1	CC1	0
24.7002	24.7709	24.5902	23.5558	24.4118	23.787				-1	5	5	5	27.8	27.8	27.8	7.8251	0	215.66	430750000	1	119	FLAGPUP|SUB|SUB_LABEL	FLAGPUP|SUB|SUB_LABEL	10
NaN	NaN	NaN	NaN	NaN	NaN				-1	4	4	0	50.4	50.4	0	13.475	0	23.573	996660	10	4	NbD000031.1;NbD028252.1;NbD018185.1;NbE44071350.1	NbD000031.1;NbD028252.1;NbD018185.1;NbE44071350.1	11
NaN	NaN	NaN	NaN	NaN	NaN				-1	1	1	1	4.7	4.7	4.7	27.96	0.0046468	6.4368	114690	16	2	NbD000040.1;NbE03058421.1	NbD000040.1;NbE03058421.1	12
22.8231	22.4464	22.5795	22.3481	22.514	22.3925				-1	12	12	6	52.8	52.8	40.3	19.871	0	202.58	79885000	12	80	NbD000081.1;NbD021878.1	NbD000081.1;NbD021878.1	13
NaN	NaN	NaN	NaN	NaN	NaN				-1	1	1	1	11	11	11	9.1733	0.0017188	7.2995	598120	3	5	NbD000131.1;NbE44072082.1;NbE03061284.1	NbD000131.1;NbE44072082.1;NbE03061284.1	14
NaN	NaN	NaN	15.1487	NaN	15.5558				-1	2	2	2	14.1	14.1	14.1	30.385	0	15.435	617890	14	9	NbD000166.1;NbE05064168.1	NbD000166.1;NbE05064168.1	15
NaN	NaN	NaN	NaN	NaN	NaN				-1	3	3	3	11.7	11.7	11.7	37.665	0	21.265	588150	11	9	NbD008120.1;NbD008119.1;NbD000167.1;NbD030941.1	NbD008120.1;NbD008119.1;NbD000167.1	16
NaN	NaN	NaN	NaN	NaN	NaN				-1	4	1	1	33.8	14.6	14.6	17.485	0.0011503	8.4126	400370	6	5	NbD000179.1;NbE03057687.1;NbE05067243.1;NbD026321.2;NbD026321.1	NbD000179.1;NbE03057687.1	17
NaN	NaN	NaN	NaN	NaN	NaN				-1	1	1	1	10.6	10.6	10.6	22.705	0	14.196	58661	4	1	NbD044739.1;NbD000181.1	NbD044739.1;NbD000181.1	18
17.2766	17.0939	NaN	NaN	17.3757	NaN				-1	2	2	2	10.4	10.4	10.4	17.38	0	15.212	1225800	7	10	NbD000183.1;NbD009419.1;NbE05065992.1;NbD041320.1;NbE03060989.1;NbD053073.1;NbD049334.1;NbD026872.1;NbD017283.1;NbD017092.1;NbD013027.1;NbD009418.1;NbD005470.1;NbD000403.1	NbD000183.1;NbD009419.1;NbE05065992.1;NbD041320.1;NbE03060989.1;NbD053073.1;NbD049334.1;NbD026872.1;NbD017283.1;NbD017092.1;NbD013027.1;NbD009418.1;NbD005470.1;NbD000403.1	19
NaN	NaN	NaN	NaN	NaN	NaN				-1	1	1	1	6.5	6.5	6.5	27.607	0.0010795	7.6879	44047	13	1	NbE44070135.1;NbD000208.1;NbE05066242.1;NbD040918.1;NbD030776.1	NbE44070135.1;NbD000208.1;NbE05066242.1;NbD040918.1;NbD030776.1	20
NaN	17.1271	16.3985	16.7093	NaN	16.6455				-1	1	1	1	17.5	17.5	17.5	11.409	0.0012121	9.9968	797610	6	10	NbD000226.1;NbD037149.1;NbE44074261.1;NbD045316.1;NbD050810.1;NbE05067968.1;NbD018363.1;NbE03056516.1;NbE44069298.1;NbE05063340.1;NbD033783.1;NbD012407.1;NbD036073.1;NbD022337.1;NbD004532.1;NbD033549.1;NbD039217.1;NbD033031.1;NbD048093.1;NbD033030.1;NbD050811.1;NbD009374.1;NbD052327.1	NbD000226.1;NbD037149.1;NbE44074261.1;NbD045316.1;NbD050810.1;NbE05067968.1;NbD018363.1;NbE03056516.1;NbE44069298.1;NbE05063340.1;NbD033783.1;NbD012407.1;NbD036073.1;NbD022337.1;NbD004532.1;NbD033549.1;NbD039217.1;NbD033031.1;NbD048093.1;NbD033030.1;NbD050811.1;NbD009374.1;NbD052327.1	21
16.7619	16.9432	16.8964	16.8324	16.8689	16.528				-1	5	5	5	19.9	19.9	19.9	40.227	0	41.045	1584400	18	22	NbD000253.1;NbE03062040.1;NbD033406.1	NbD000253.1;NbE03062040.1;NbD033406.1	22
NaN	NaN	NaN	NaN	NaN	NaN				-1	1	1	1	12	12	12	16.131	0.0016067	6.7456	619640	9	5	NbD000261.1;NbE03062283.1	NbD000261.1;NbE03062283.1	23
NaN	NaN	NaN	NaN	NaN	NaN				-1	1	1	1	9.1	9.1	9.1	24.596	0.0012285	10.691	149700	8	4	NbD000350.1;NbE05065393.1	NbD000350.1;NbE05065393.1	24
NaN	NaN	NaN	NaN	NaN	NaN				-1	1	1	1	4	4	4	61.786	0.0046382	6.4265	36567	24	1	NbD033340.1;NbD000370.1	NbD033340.1;NbD000370.1	25
NaN	NaN	NaN	NaN	NaN	NaN				-1	1	1	1	2.2	2.2	2.2	47.52	0.0054479	6.3033	140950	18	4	NbD050505.1;NbD000398.1;NbD052035.1;NbD025088.1	NbD050505.1;NbD000398.1;NbD052035.1;NbD025088.1	26
NaN	NaN	NaN	NaN	NaN	NaN				-1	1	1	1	22.8	22.8	22.8	13.27	0	23.147	19409	6	2	NbE05068048.1;NbD036316.1;NbD029571.1;NbD024461.1;NbD007120.1;NbD000402.1	NbE05068048.1;NbD036316.1;NbD029571.1;NbD024461.1;NbD007120.1;NbD000402.1	27
NaN	NaN	NaN	NaN	NaN	NaN				-1	1	1	1	0.7	0.7	0.7	174.6	0.0048975	6.3587	336640	76	4	NbD000435.1	NbD000435.1	28
NaN	NaN	NaN	NaN	NaN	NaN				-1	2	2	2	5.9	5.9	5.9	44.902	0	13.49	204190	30	7	NbD011045.1;NbD000443.1;NbD005850.1;NbD034289.1;NbD043291.1;NbD047840.1;NbD046564.1;NbD037594.1;NbD012079.1;NbD050047.1;NbD035842.1;NbD022390.1;NbD012087.1;NbD051719.1;NbE44070731.1;NbD017206.1;NbD047280.1;NbD005287.1;NbD025321.1;NbD021175.1;NbD024595.1;NbD016657.1;NbE03058717.1	NbD011045.1;NbD000443.1;NbD005850.1;NbD034289.1;NbD043291.1;NbD047840.1;NbD046564.1;NbD037594.1;NbD012079.1;NbD050047.1;NbD035842.1;NbD022390.1;NbD012087.1;NbD051719.1;NbE44070731.1;NbD017206.1;NbD047280.1;NbD005287.1;NbD025321.1;NbD021175.1;NbD024595.1;NbD016657.1;NbE03058717.1	29
NaN	NaN	NaN	NaN	NaN	NaN				-1	2	2	2	17.6	17.6	17.6	15.274	0	35.283	164280	8	4	NbD036178.1;NbD000465.1;NbD013005.1;NbD002065.1	NbD036178.1;NbD000465.1;NbD013005.1;NbD002065.1	30
NaN	NaN	NaN	NaN	NaN	NaN				-1	3	3	1	10.7	10.7	6.2	26.65	0	13.181	5686.9	11	1	NbD000498.1;NbD046340.1	NbD000498.1;NbD046340.1	31
16.6936	16.2165	16.6869	16.2799	16.4912	16.3301				-1	16	16	3	33.3	33.3	7.2	65.049	0	121.68	2236500	32	39	NbD000520.1	NbD000520.1	32
NaN	NaN	NaN	NaN	NaN	NaN				-1	1	1	1	1.1	1.1	1.1	181.97	0.0054217	6.2844	31594	79	2	NbE03055315.1;NbD000535.1	NbE03055315.1;NbD000535.1	33
17.1543	NaN	17.1917	16.4	16.5595	16.5101				-1	6	6	6	29.3	29.3	29.3	39.098	0	58.512	823870	21	17	NbD020285.1;NbD000560.1;NbD050608.1;NbE05064343.1;NbD007911.1	NbD020285.1;NbD000560.1;NbD050608.1;NbE05064343.1;NbD007911.1	34
NaN	NaN	NaN	NaN	NaN	NaN				-1	1	1	1	7.3	7.3	7.3	20.172	0.0043901	6.5225	31604	8	1	NbE03060310.1;NbD024641.1;NbD000579.1	NbE03060310.1;NbD024641.1;NbD000579.1	35
NaN	15.7797	15.6594	15.8549	NaN	15.8825				-1	3	3	3	6.2	6.2	6.2	86.865	0	36.08	493240	39	11	NbD000582.1;NbD034306.1;NbE05068506.1;NbD052576.1	NbD000582.1;NbD034306.1	36
NaN	NaN	NaN	NaN	NaN	NaN				-1	1	1	1	2.3	2.3	2.3	62.605	0.001142	8.2783	211180	25	4	NbE44074047.1;NbD000585.1;NbE05065323.1;NbD024608.1	NbE44074047.1;NbD000585.1;NbE05065323.1;NbD024608.1	37
NaN	NaN	NaN	15.994	15.4563	16.1076				-1	11	1	1	31.2	3.3	3.3	54.052	0	40.443	557950	27	9	NbD000606.1	NbD000606.1	38
NaN	NaN	NaN	NaN	NaN	NaN				-1	1	1	1	3.1	3.1	3.1	53.649	0.0091257	6.1137	59912	19	2	NbD032466.1;NbD000625.1	NbD032466.1;NbD000625.1	39
NaN	NaN	NaN	NaN	NaN	NaN				-1	1	1	1	3.2	3.2	3.2	56.863	0.0016313	6.85	17760	23	1	NbD006014.1;NbD000659.1	NbD006014.1;NbD000659.1	40
NaN	16.9466	NaN	16.5437	NaN	16.8066				-1	9	9	3	19.1	19.1	7.7	89.182	0	77.031	897390	37	16	NbD000685.1;NbD039151.1;NbE44073367.1;NbD022542.1;NbD013300.1	NbD000685.1	41
NaN	NaN	NaN	NaN	15.9064	15.7551				-1	3	3	3	8.3	8.3	8.3	41.335	0	18.841	458550	13	8	NbE44072868.1;NbD000691.1;NbE05063733.1;NbE03060275.1;NbD022414.1;NbD053201.1;NbE03056418.1;NbD035497.1;NbD019128.1	NbE44072868.1;NbD000691.1;NbE05063733.1	42
18.871	19.6277	18.5181	19.556	NaN	19.1675				-1	21	4	2	35.7	8.2	2.9	83.327	0	95.633	3903400	39	16	NbD000717.1;NbD015671.1	NbD000717.1	43
NaN	NaN	NaN	NaN	NaN	NaN				-1	1	1	1	9.4	9.4	9.4	24.667	0	34.514	144470	11	4	NbD004092.1;NbD039660.1;NbE03061117.1;NbD034735.1;NbD000719.1;NbE05064642.1	NbD004092.1;NbD039660.1;NbE03061117.1;NbD034735.1;NbD000719.1;NbE05064642.1	44
NaN	NaN	NaN	NaN	NaN	NaN				-1	2	2	2	2.2	2.2	2.2	141.3	0	12.029	59643	52	2	NbE05066701.1;NbD043060.1;NbE44074184.1;NbE03055704.1;NbD000733.1	NbE05066701.1;NbD043060.1;NbE44074184.1;NbE03055704.1;NbD000733.1	45
NaN	NaN	NaN	NaN	NaN	NaN				-1	4	4	3	5.9	5.9	4.7	129.46	0	27.403	198360	65	6	NbE44071076.1;NbD000742.1	NbE44071076.1;NbD000742.1	46
NaN	NaN	16.3705	NaN	NaN	16.5808				-1	4	4	3	12	12	9.5	48.718	0	23.523	382380	23	8	NbD000762.1;NbE44073946.1;NbE03056140.1;NbD005845.1	NbD000762.1;NbE44073946.1;NbE03056140.1;NbD005845.1	47
NaN	NaN	NaN	NaN	NaN	NaN				-1	1	1	1	11.3	11.3	11.3	16.94	0.001065	7.639	260780	6	4	NbD045330.1;NbD025937.1;NbD049618.1;NbD028952.1;NbD005938.1;NbD000767.1	NbD045330.1;NbD025937.1;NbD049618.1;NbD028952.1;NbD005938.1;NbD000767.1	48
16.2631	16.4428	16.4725	NaN	17.2091	16.7114				-1	2	2	1	6.8	6.8	4.1	39.767	0	22.301	1099900	20	13	NbD000769.1;NbD011546.1	NbD000769.1;NbD011546.1	49
NaN	NaN	NaN	NaN	NaN	NaN				-1	6	1	1	9.7	1.7	1.7	91.555	0.001107	7.9173	150400	52	6	NbD000771.1	NbD000771.1	50
NaN	NaN	NaN	16.4514	16.3386	NaN				-1	3	3	1	11.7	11.7	3.4	54.609	0	36.83	483170	23	9	NbE05065963.1;NbD000775.1	NbE05065963.1;NbD000775.1	51
19.3432	20.1235	19.6459	20.17	19.7448	19.9663				-1	6	2	2	17.6	10.7	10.7	17.4	0	110.62	8550300	11	23	NbD034983.1;NbD005190.1;NbD000793.1;NbD051419.1;NbD023244.1;NbD022731.1	NbD034983.1;NbD005190.1;NbD000793.1;NbD051419.1;NbD023244.1;NbD022731.1	52
NaN	NaN	NaN	NaN	NaN	NaN				-1	1	1	1	3.7	3.7	3.7	55.783	0.0017277	7.3524	3513	28	1	NbE03054958.1;NbD000798.1	NbE03054958.1;NbD000798.1	53
18.0618	17.6269	18.1426	18.2584	18.3792	18.3059				-1	6	6	6	22.8	22.8	22.8	29.908	0	144.2	5027700	9	30	NbD004804.1;NbD000808.1	NbD004804.1;NbD000808.1	54
NaN	NaN	NaN	NaN	NaN	NaN				-1	1	1	1	6.8	6.8	6.8	27.608	0.0012072	9.7067	194870	12	4	NbD051507.1;NbD002499.1;NbD000817.1	NbD051507.1;NbD002499.1;NbD000817.1	55
19.1649	19.314	19.2498	19.1167	19.1986	19.0035				-1	12	12	2	32.8	32.8	6.9	51.251	0	100.65	9253300	27	52	NbD000821.1	NbD000821.1	56
18.0087	17.8901	17.6846	17.6695	17.4667	17.4738				-1	4	4	4	15.5	15.5	15.5	43.226	0	35.592	2356800	21	19	NbD036094.1;NbD000822.1;NbD014721.1;NbE03055990.1;NbD047590.1	NbD036094.1;NbD000822.1;NbD014721.1;NbE03055990.1;NbD047590.1	57
NaN	NaN	NaN	NaN	NaN	NaN				-1	2	2	2	3	3	3	84.242	0	12.536	135940	37	5	NbE44069521.1;NbD000842.1;NbD030936.1	NbE44069521.1;NbD000842.1;NbD030936.1	58
NaN	NaN	NaN	NaN	NaN	NaN				-1	2	1	1	6.8	4.1	4.1	39.689	0.0016103	6.7582	106320	20	2	NbD000855.1	NbD000855.1	59
NaN	NaN	NaN	NaN	NaN	NaN				-1	1	1	1	8.2	8.2	8.2	21.577	0.0016961	7.1847	505630	9	4	NbD046805.1;NbD000867.1	NbD046805.1;NbD000867.1	60
18.2462	18.3899	18.2717	18.1086	17.9232	17.9764				-1	18	18	18	28.9	28.9	28.9	91.866	0	186.79	6848500	47	76	NbD000885.1	NbD000885.1	61
18.5743	18.5099	18.5104	NaN	18.1911	17.9636				-1	15	4	4	38.4	16.2	16.2	57.359	0	37.456	3001500	28	19	NbD000886.1	NbD000886.1	62
NaN	NaN	NaN	NaN	NaN	NaN				-1	1	1	1	8.5	8.5	8.5	26.999	0.0046483	6.4394	444090	13	2	NbE05068939.1;NbD000895.1	NbE05068939.1;NbD000895.1	63
NaN	NaN	NaN	NaN	NaN	NaN				-1	9	2	2	19.6	3	3	57.257	0	12.576	182320	28	2	NbD000914.1;NbD000913.1;NbD000110.1;NbD028822.1	NbD000914.1;NbD000913.1;NbD000110.1;NbD028822.1	64
NaN	NaN	NaN	NaN	NaN	NaN				-1	2	2	1	16.1	16.1	9.4	20.849	0	48.408	2223000	11	8	NbE03062109.1;NbD037613.1;NbD000955.1	NbE03062109.1;NbD037613.1;NbD000955.1	65
NaN	NaN	NaN	NaN	NaN	NaN				-1	2	1	1	6.1	3	3	58.265	0.0016383	6.8903	193440	27	2	NbD000959.1	NbD000959.1	66
NaN	NaN	NaN	NaN	NaN	NaN				-1	19	1	1	36.8	2.6	2.6	57.948	0.0017349	7.4251	488030	23	2	NbD000964.1;NbE05068087.1;NbE03055005.1;NbD022764.1;NbD008309.1	NbD000964.1	67
15.9257	17.3918	16.3226	17.8665	16.4331	17.7375				-1	11	11	2	50.5	50.5	16.5	21.975	0	172.12	4281500	10	49	NbD022454.1;NbD000971.1;NbD023579.1;NbD009944.1	NbD022454.1;NbD000971.1;NbD023579.1	68
NaN	NaN	NaN	NaN	NaN	NaN				-1	2	2	2	5.2	5.2	5.2	69.836	0	12.746	132250	31	2	NbE03060692.1;NbD001003.1;NbE44072561.1;NbD010464.1;NbE03062229.1;NbE05063774.1	NbE03060692.1;NbD001003.1;NbE44072561.1;NbD010464.1;NbE03062229.1;NbE05063774.1	69
15.6237	17.7614	16.7534	18.157	17.3173	18.2356				-1	10	9	3	26.2	22.8	8.2	59.198	0	65.793	2551300	30	24	NbE05064327.1;NbD001004.1;NbD041333.1	NbE05064327.1;NbD001004.1	70
NaN	NaN	NaN	NaN	NaN	NaN				-1	1	1	1	6.2	6.2	6.2	23.489	0.0012255	10.537	41300	11	1	NbD001012.1;NbD043787.1;NbE05064329.1;NbD040627.1;NbD051532.1	NbD001012.1;NbD043787.1;NbE05064329.1;NbD040627.1;NbD051532.1	71
NaN	NaN	NaN	NaN	NaN	NaN				-1	1	1	1	31.7	31.7	31.7	10.429	0.0016134	6.7794	106390	5	1	NbD035478.1;NbE05065948.1;NbD001025.1	NbD035478.1;NbE05065948.1;NbD001025.1	72
NaN	NaN	NaN	NaN	NaN	NaN				-1	4	4	3	17.6	17.6	17.6	24.622	0	21.635	278410	10	5	NbD035474.1;NbD001029.1;NbD027909.1;NbD033517.1;NbD042020.1;NbD018863.1	NbD035474.1;NbD001029.1;NbD027909.1	73
NaN	NaN	15.8983	16.5677	NaN	16.4553				-1	1	1	1	5.5	5.5	5.5	30.075	0.001078	7.6745	528770	16	8	NbE05068357.1;NbE44070631.1;NbD044497.1;NbE05066228.1;NbD001031.1;NbE44074647.1;NbD030176.1;NbE03058653.1;NbD048598.1	NbE05068357.1;NbE44070631.1;NbD044497.1;NbE05066228.1;NbD001031.1;NbE44074647.1;NbD030176.1;NbE03058653.1;NbD048598.1	74
NaN	15.5836	NaN	NaN	15.531	NaN				-1	2	2	1	2.5	2.5	1.3	108.35	0	13.81	173550	50	5	NbD001038.1	NbD001038.1	75
18.4643	18.376	18.4291	18.2007	18.1873	18.007				-1	9	9	9	24.9	24.9	24.9	46.712	0	73.434	3409700	21	29	NbD050412.1;NbD001051.1	NbD050412.1;NbD001051.1	76
15.4024	NaN	14.1254	NaN	NaN	NaN				-1	4	4	3	43	43	34.6	11.77	0	23.563	486710	6	10	NbD028652.1;NbD022971.1;NbD001068.1;NbE03061671.1;NbD022270.1	NbD028652.1;NbD022971.1;NbD001068.1;NbE03061671.1;NbD022270.1	77
NaN	NaN	NaN	NaN	NaN	NaN				-1	3	1	1	9	3.7	3.7	33.993	0.0074806	6.2198	20269	20	1	NbE05067102.1;NbD039956.1;NbD001085.1	NbE05067102.1;NbD039956.1;NbD001085.1	78
NaN	NaN	NaN	NaN	NaN	NaN				-1	4	1	1	4.7	1.4	1.4	106.3	0	17.437	309340	59	6	NbD001101.1	NbD001101.1	79
16.5406	NaN	16.5882	NaN	NaN	NaN				-1	3	3	3	15	15	15	25.416	0	23.289	645170	12	8	NbD039182.1;NbD035943.1;NbD001120.1	NbD039182.1;NbD035943.1;NbD001120.1	80
17.4741	17.8635	NaN	NaN	17.3644	17.404				-1	3	3	2	23.8	23.8	16.9	17.654	0	19.088	1546500	10	10	NbD001126.1;NbD016103.1	NbD001126.1	81
NaN	NaN	NaN	NaN	NaN	NaN				-1	3	3	1	16.4	16.4	4.4	30.661	0	16.393	398560	16	7	NbD001150.1;NbE03054029.1;NbD043820.1	NbD001150.1;NbE03054029.1;NbD043820.1	82
NaN	NaN	NaN	NaN	NaN	NaN				-1	2	2	2	17.6	17.6	17.6	25.024	0	12.775	135740	14	3	NbD038455.1;NbD001175.1	NbD038455.1;NbD001175.1	83
NaN	NaN	NaN	NaN	NaN	NaN				-1	1	1	1	21.8	21.8	21.8	14.194	0	12.262	177920	5	3	NbD041891.1;NbD048187.1;NbD001187.1;NbD050976.1;NbD026601.1	NbD041891.1;NbD048187.1;NbD001187.1;NbD050976.1;NbD026601.1	84
NaN	NaN	NaN	NaN	NaN	NaN				-1	1	1	1	7.2	7.2	7.2	37.434	0	14.681	173050	13	3	NbD001214.1;NbE05064015.1	NbD001214.1;NbE05064015.1	85
NaN	NaN	NaN	NaN	NaN	NaN				-1	2	2	2	22.4	22.4	22.4	21.031	0	13.558	194930	5	3	NbD001227.1;NbD008610.1;NbD052573.1	NbD001227.1;NbD008610.1;NbD052573.1	86
NaN	NaN	NaN	NaN	NaN	NaN				-1	2	2	2	3.5	3.5	3.5	118.67	0	13.143	95081	58	3	NbD001243.1	NbD001243.1	87
NaN	NaN	NaN	NaN	NaN	NaN				-1	1	1	1	6.2	6.2	6.2	35.715	0.001407	7.57	31605	19	1	NbD001250.1;NbD050115.1	NbD001250.1;NbD050115.1	88
17.0943	17.0522	17.1139	17.0284	17.4741	17.0509				-1	3	3	3	17.4	17.4	17.4	22.187	0	30.817	1477200	14	16	NbD050116.1;NbD001253.1	NbD050116.1;NbD001253.1	89
17.1766	18.0581	NaN	18.0527	17.0825	18.0402				-1	6	6	6	34.7	34.7	34.7	16.697	0	42.712	2606600	9	18	NbD042647.1;NbD035112.1;NbD024762.1;NbD001268.1;NbD013148.1;NbD034742.1	NbD042647.1;NbD035112.1;NbD024762.1;NbD001268.1;NbD013148.1;NbD034742.1	90
NaN	NaN	NaN	NaN	NaN	NaN				-1	1	1	1	5.2	5.2	5.2	30.621	0.0011325	8.1376	641700	13	6	NbD001273.1;NbE03061488.1	NbD001273.1;NbE03061488.1	91
16.5055	16.4769	16.5257	16.3248	16.3119	16.1945				-1	14	14	14	16.8	16.8	16.8	115.3	0	99.467	1915300	61	37	NbD001276.1;NbE05066062.1;NbD035130.1	NbD001276.1;NbE05066062.1;NbD035130.1	92
17.1736	16.6785	17.1123	16.823	17.2516	16.6752				-1	8	8	8	20.5	20.5	20.5	57.9	0	86.241	2627200	26	34	NbD001279.1;NbD035127.1;NbE05066063.1;NbE05066966.1;NbE44072876.1	NbD001279.1;NbD035127.1;NbE05066063.1;NbE05066966.1;NbE44072876.1	93
NaN	NaN	NaN	NaN	16.6393	18.0205				-1	2	2	2	15	15	15	17.236	0	26.222	1556600	5	8	NbD039520.1;NbD049002.1;NbD014363.1;NbD044612.1;NbD025627.1;NbD020313.1;NbD018795.1;NbD001284.1;NbE05065758.1	NbD039520.1;NbD049002.1;NbD014363.1;NbD044612.1;NbD025627.1;NbD020313.1;NbD018795.1;NbD001284.1;NbE05065758.1	94
NaN	NaN	NaN	NaN	NaN	NaN				-1	1	1	1	23.4	23.4	23.4	5.4391	0.0046714	6.4697	215590	1	4	NbD043336.1;NbD040412.1;NbD001294.1	NbD043336.1;NbD040412.1;NbD001294.1	95
NaN	NaN	NaN	NaN	NaN	NaN				-1	6	2	2	19.8	8	8	44.475	0	15.962	292960	24	5	NbD013330.1;NbD001331.1	NbD013330.1;NbD001331.1	96
NaN	NaN	NaN	NaN	NaN	NaN				-1	5	5	5	14.5	14.5	14.5	52.723	0	34.423	438000	18	10	NbE03060176.1;NbD044570.1;NbE03053604.1;NbD001336.1;NbD041922.1	NbE03060176.1;NbD044570.1;NbE03053604.1;NbD001336.1	97
NaN	NaN	NaN	NaN	NaN	NaN				-1	1	1	1	25	25	25	8.7987	0.0060132	6.2709	112150	5	2	NbD001355.1;NbD036561.1;NbD032296.1	NbD001355.1;NbD036561.1;NbD032296.1	98
17.7394	16.9378	17.5213	17.0731	17.4336	17.1385				-1	15	15	8	28.7	28.7	14.3	91.271	0	149.19	4710500	42	62	NbD001358.1;NbE05067511.1	NbD001358.1;NbE05067511.1	99
NaN	NaN	NaN	NaN	NaN	NaN				-1	1	1	1	8.1	8.1	8.1	21.494	0.0010726	7.67	499990	9	5	NbD014178.1;NbD050614.1;NbE05068164.1;NbD001375.1;NbE44071601.1;NbE03058771.1;NbD007487.1	NbD014178.1;NbD050614.1;NbE05068164.1;NbD001375.1;NbE44071601.1;NbE03058771.1;NbD007487.1	100
NaN	NaN	NaN	NaN	NaN	NaN				-1	1	1	1	12.7	12.7	12.7	13.025	0.0010688	7.6513	71902	7	1	NbE03062597.1;NbE05064540.1;NbD001379.1;NbD050616.1;NbD007484.1	NbE03062597.1;NbE05064540.1;NbD001379.1;NbD050616.1;NbD007484.1	101
NaN	NaN	NaN	NaN	NaN	NaN				-1	1	1	1	12.9	12.9	12.9	11.429	0.0016801	7.1328	114260	8	2	NbD024526.1;NbD001382.1	NbD024526.1;NbD001382.1	102
NaN	18.0442	NaN	18.3835	17.9038	NaN				-1	4	4	2	7.7	7.7	4.3	64.845	0	37.496	2572300	29	12	NbD050982.1;NbE44072687.1;NbD001388.1	NbD050982.1;NbE44072687.1;NbD001388.1	103
NaN	NaN	NaN	16.8173	16.5128	16.6899				-1	4	3	1	5.9	4.8	3	102.14	0	35.254	455640	45	7	NbD001415.1;NbE05065485.1	NbD001415.1;NbE05065485.1	104
NaN	15.3512	NaN	NaN	NaN	15.6061				-1	2	2	2	4	4	4	76.803	0	13.942	250000	41	7	NbD001439.1;NbD010666.1;NbE44072362.1;NbE44073943.1;NbE05062824.1;NbD017064.1;NbE03056641.1	NbD001439.1;NbD010666.1;NbE44072362.1;NbE44073943.1;NbE05062824.1;NbD017064.1;NbE03056641.1	105
NaN	NaN	NaN	NaN	NaN	NaN				-1	2	2	1	6	6	3.6	55.565	0	19.34	155890	25	7	NbD001442.1	NbD001442.1	106
15.8187	NaN	15.6163	NaN	15.735	NaN				-1	3	3	3	8.1	8.1	8.1	60.318	0	19.884	425850	32	9	NbD001450.1;NbD035861.1;NbE05065933.1	NbD001450.1;NbD035861.1;NbE05065933.1	107
NaN	NaN	NaN	NaN	NaN	NaN				-1	1	1	1	2	2	2	106.47	0.007485	6.2225	16911	48	1	NbD001460.1;NbE05065222.1;NbD036878.1	NbD001460.1;NbE05065222.1;NbD036878.1	108
NaN	17.2799	NaN	17.0015	NaN	17.1414				-1	5	5	2	17.5	17.5	8.7	43.682	0	46.532	828680	26	13	NbD001463.1	NbD001463.1	109
16.9999	NaN	17.3785	NaN	NaN	NaN				-1	2	2	2	14.8	14.8	14.8	25.735	0	19.094	429090	11	7	NbD024071.1;NbD001471.1	NbD024071.1;NbD001471.1	110
17.5353	16.9452	17.2779	17.1068	17.0817	16.8537				-1	7	7	7	23	23	23	27.784	0	54.019	2459700	14	26	NbD001486.1;NbD014314.1;NbE03061005.1	NbD001486.1;NbD014314.1;NbE03061005.1	111
NaN	16.2761	NaN	15.7284	NaN	NaN				-1	3	3	3	14.7	14.7	14.7	39.477	0	26.207	508330	13	9	NbD001490.1;NbD038852.1	NbD001490.1;NbD038852.1	112
NaN	NaN	NaN	NaN	NaN	NaN				-1	1	1	1	3.9	3.9	3.9	25.644	0.004644	6.4321	117250	10	3	NbE03053563.1;NbD049770.1;NbD001508.1	NbE03053563.1;NbD049770.1;NbD001508.1	113
NaN	NaN	NaN	NaN	NaN	NaN				-1	1	1	1	26.4	26.4	26.4	5.6906	0.0016108	6.7633	46756	2	1	NbD049769.1;NbD001509.1	NbD049769.1;NbD001509.1	114
16.9157	NaN	16.6023	NaN	16.1055	15.7841				-1	5	3	3	12.5	9.9	9.9	45.626	0	22.886	599750	20	11	NbE03056466.1;NbE44072653.1;NbE44074028.1;NbD046614.1;NbE05067078.1;NbD001512.1	NbE03056466.1;NbE44072653.1;NbE44074028.1;NbD046614.1;NbE05067078.1;NbD001512.1	115
NaN	18.9382	15.629	19.0843	15.6105	17.5603				-1	17	17	3	14.3	14.3	2.4	186.64	0	148.65	4318400	92	44	NbE05062828.1;NbD001515.1;NbE03055700.1;NbE05064761.1;NbE05063836.1;NbD028343.1;NbD021822.1	NbE05062828.1;NbD001515.1	116
NaN	NaN	NaN	NaN	NaN	NaN				-1	1	1	1	10.4	10.4	10.4	18.178	0.0011459	8.3296	259260	7	5	NbD001553.1	NbD001553.1	117
NaN	18.0054	NaN	17.7775	NaN	17.7577				-1	8	8	5	32.1	32.1	24.2	37.6	0	66.474	1947100	16	22	NbD001576.1;NbD030371.1;NbD047493.1	NbD001576.1;NbD030371.1	118
NaN	17.394	17.895	18.0347	17.7026	17.8408				-1	3	3	3	19.5	19.5	19.5	22.638	0	28.791	1430800	12	13	NbD001579.1;NbD006432.1;NbD014824.1;NbE44069649.1;NbD023283.1	NbD001579.1	119
NaN	NaN	NaN	NaN	NaN	NaN				-1	2	2	2	4.3	4.3	4.3	84.534	0.001224	10.506	83137	39	3	NbE05063633.1;NbE44071351.1;NbE05065713.1;NbD001588.1	NbE05063633.1;NbE44071351.1;NbE05065713.1;NbD001588.1	120
NaN	NaN	NaN	NaN	NaN	NaN				-1	6	2	2	15.4	4.5	4.5	49.779	0	15.489	937510	20	6	NbD001607.1	NbD001607.1	121
NaN	NaN	NaN	NaN	NaN	NaN				-1	1	1	1	11.4	11.4	11.4	15.117	0.0010772	7.6717	128130	9	3	NbD001620.1	NbD001620.1	122
NaN	NaN	NaN	NaN	NaN	NaN				-1	2	2	0	3	3	0	116.57	0.0011177	8	0	52	0	NbE05066607.1;NbD001630.1;NbE03060761.1;NbE44069165.1	NbE05066607.1;NbD001630.1;NbE03060761.1;NbE44069165.1	123
19.825	19.8213	20.1149	20.1056	20.1851	20.092				-1	21	21	17	33.3	33.3	31.7	68.399	0	265.12	21153000	22	113	NbD001635.1;NbE44071034.1;NbD049141.1;NbD050521.1;NbD033830.1	NbD001635.1;NbE44071034.1;NbD049141.1	124
NaN	NaN	NaN	17.5555	NaN	17.7336				-1	1	1	1	1.9	1.9	1.9	88.326	0.0010885	7.7609	1456700	43	8	NbE05065904.1;NbD009773.1;NbD001649.1	NbE05065904.1;NbD009773.1;NbD001649.1	125
NaN	NaN	NaN	NaN	NaN	NaN				-1	1	1	1	5.1	5.1	5.1	30.19	0.0011334	8.1533	483500	12	5	NbD033202.1;NbD001672.1	NbD033202.1;NbD001672.1	126
NaN	17.2117	16.3381	NaN	16.1126	NaN				-1	4	4	4	17.8	17.8	17.8	37.801	0	28.563	842120	16	12	NbD024764.1;NbD001678.1;NbD041681.1	NbD024764.1;NbD001678.1	127
NaN	NaN	NaN	NaN	NaN	NaN				-1	2	2	2	17.4	17.4	17.4	29.69	0	15.773	459560	15	5	NbD001694.1	NbD001694.1	128
17.7264	17.318	17.4103	17.1639	17.2742	16.9381				-1	3	3	3	11.6	11.6	11.6	54.965	0	76.718	1666900	27	20	NbD001696.1;NbE03059019.1;NbD028530.1	NbD001696.1;NbE03059019.1;NbD028530.1	129
15.4486	15.2255	NaN	NaN	NaN	NaN				-1	2	2	1	7.5	7.5	3.8	49.22	0	15.911	180650	26	8	NbD001713.1;NbE03058115.1	NbD001713.1;NbE03058115.1	130
NaN	NaN	NaN	NaN	NaN	NaN				-1	1	1	1	3	3	3	44.047	0.0016051	6.7429	239510	19	3	NbE03060907.1;NbD001742.1;NbE03058902.1;NbD040397.1;NbD038890.1;NbD050156.1	NbE03060907.1;NbD001742.1;NbE03058902.1;NbD040397.1;NbD038890.1;NbD050156.1	131
NaN	NaN	NaN	NaN	NaN	NaN				-1	1	1	1	3	3	3	58.258	0.0054612	6.3147	25924	27	2	NbD001749.1	NbD001749.1	132
18.1283	17.8533	17.9081	17.8297	17.802	17.7231				-1	15	15	2	30.1	30.1	6.2	76.003	0	187.16	8370400	41	79	NbD001761.1	NbD001761.1	133
NaN	NaN	NaN	NaN	NaN	NaN				-1	3	3	3	18.2	18.2	18.2	38.01	0	29.274	462040	20	7	NbD001764.1	NbD001764.1	134
NaN	NaN	NaN	NaN	NaN	NaN				-1	1	1	1	2.7	2.7	2.7	51.805	0.0057143	6.2758	130800	15	2	NbD039198.1;NbD035085.1;NbD001765.1	NbD039198.1;NbD035085.1;NbD001765.1	135
16.5326	16.4077	16.3437	15.8507	15.9618	15.6728				-1	3	3	3	11.5	11.5	11.5	40.268	0	20.991	771340	14	15	NbE05068155.1;NbE44074170.1;NbD001766.1;NbE03056776.1;NbD035131.1;NbE05067683.1	NbE05068155.1;NbE44074170.1;NbD001766.1;NbE03056776.1;NbD035131.1	136
NaN	NaN	NaN	NaN	NaN	NaN				-1	8	2	2	29.4	7.4	7.4	40.55	0	11.542	253870	18	5	NbD001767.1	NbD001767.1	137
NaN	NaN	NaN	NaN	NaN	NaN				-1	2	2	2	11.4	11.4	11.4	23.338	0	11.698	85511	10	2	NbE03058311.1;NbD001803.1	NbE03058311.1;NbD001803.1	138
NaN	NaN	NaN	NaN	NaN	NaN				-1	2	2	1	11.6	11.6	11.6	25.578	0.00041824	11.346	137390	8	2	NbD031197.1;NbD001805.1	NbD031197.1;NbD001805.1	139
NaN	NaN	NaN	16.6615	16.8607	NaN				-1	7	2	2	22.4	10	10	31.336	0	30.42	699280	12	8	NbD001815.1;NbE05067944.1	NbD001815.1;NbE05067944.1	140
NaN	NaN	NaN	NaN	15.944	15.8539				-1	2	2	2	5.9	5.9	5.9	57.888	0	27.171	454630	26	7	NbE05063019.1;NbE05066073.1;NbD001830.1	NbE05063019.1;NbE05066073.1;NbD001830.1	141
NaN	NaN	NaN	NaN	NaN	NaN				-1	1	1	1	5.1	5.1	5.1	28.281	0.0010985	7.8502	96127	6	2	NbD001846.1	NbD001846.1	142
NaN	NaN	NaN	NaN	NaN	NaN				-1	2	2	2	17.5	17.5	17.5	20.571	0	11.804	384210	9	5	NbD039977.1;NbD001874.1	NbD039977.1;NbD001874.1	143
NaN	17.0634	NaN	17.1873	NaN	17.0304				-1	4	4	4	28.7	28.7	28.7	20.618	0	53.66	1223200	14	16	NbD001875.1	NbD001875.1	144
NaN	18.1029	18.0196	18.9532	NaN	18.5546				-1	23	2	2	41.2	3	3	55.465	0	34.634	4033300	21	18	NbD001885.1;NbD021566.1	NbD001885.1	145
NaN	NaN	NaN	NaN	NaN	NaN				-1	1	1	1	11.2	11.2	11.2	23.739	0	16.41	281710	10	4	NbE03055122.1;NbD023729.1;NbD001896.1	NbE03055122.1;NbD023729.1;NbD001896.1	146
NaN	NaN	NaN	NaN	NaN	NaN				-1	9	1	1	40.7	7.7	7.7	21.988	0.0017001	7.1995	97576	10	3	NbD001902.1	NbD001902.1	147
16.8905	16.1022	16.5584	16.1103	16.2465	16.1902				-1	5	5	5	6.3	6.3	6.3	125.85	0	34.424	1076900	58	17	NbE05064748.1;NbD023580.1;NbD001905.1	NbE05064748.1;NbD023580.1;NbD001905.1	148
NaN	NaN	NaN	NaN	NaN	NaN				-1	1	1	1	3.4	3.4	3.4	56.942	0.0051656	6.3299	22340	28	1	NbD001917.1	NbD001917.1	149
17.8987	17.5643	17.7406	17.312	17.5442	17.2471				-1	10	7	7	10.1	8.7	8.7	114.2	0	59.246	2471500	53	26	NbE44069704.1;NbD001919.1;NbD009361.1	NbE44069704.1;NbD001919.1;NbD009361.1	150
17.8979	17.8539	17.7068	17.7717	17.6618	17.5101				-1	2	2	2	9.4	9.4	9.4	30.315	0	17.258	1718500	13	16	NbE05063659.1;NbD009359.1;NbD001922.1	NbE05063659.1;NbD009359.1;NbD001922.1	151
NaN	NaN	15.7115	15.1838	16.2088	15.572				-1	3	3	3	14.2	14.2	14.2	30.863	0	31.87	563970	18	12	NbE05067842.1;NbD001930.1;NbD049258.1;NbE03055036.1;NbD013779.1;NbE03054406.1	NbE05067842.1;NbD001930.1;NbD049258.1;NbE03055036.1;NbD013779.1	152
NaN	NaN	NaN	NaN	NaN	NaN				-1	1	1	1	2.5	2.5	2.5	52.064	0.0016329	6.8595	102580	26	2	NbE05068430.1;NbD005046.1;NbD001935.1	NbE05068430.1;NbD005046.1;NbD001935.1	153
NaN	17.0307	NaN	NaN	NaN	16.0909				-1	4	4	3	19.4	19.4	14	46.608	0	32.412	338880	19	7	NbD001938.1;NbD024077.1	NbD001938.1;NbD024077.1	154
NaN	NaN	NaN	17.4348	NaN	16.4828				-1	19	3	3	43.1	5	5	19.742	0	22.301	967400	9	9	NbD001947.1	NbD001947.1	155
NaN	NaN	NaN	NaN	NaN	NaN				-1	1	1	1	4.9	4.9	4.9	25.417	0.0043764	6.497	37452	12	2	NbD001960.1	NbD001960.1	156
21.7889	21.7986	22.0218	22.0574	22.3692	22.1603				-1	25	25	25	62.3	62.3	62.3	24.204	0	323.31	111020000	12	118	NbD035639.1;NbD001974.1	NbD035639.1;NbD001974.1	157
NaN	NaN	NaN	NaN	NaN	NaN				-1	1	1	1	1.9	1.9	1.9	75.488	0.0016442	6.9147	45229	34	1	NbD035642.1;NbE44070979.1;NbE03053557.1;NbD001980.1	NbD035642.1;NbE44070979.1;NbE03053557.1;NbD001980.1	158
16.1651	16.5148	16.0164	NaN	NaN	NaN				-1	5	5	3	7.5	7.5	4	147.82	0	29.618	373970	60	9	NbE05063289.1;NbD002047.1;NbE03060263.1	NbE05063289.1;NbD002047.1	159
NaN	NaN	NaN	NaN	NaN	NaN				-1	1	1	1	2.8	2.8	2.8	87.011	0.0011316	8.1238	52135	42	1	NbE05064977.1;NbE44072521.1;NbD025847.1;NbD002054.1	NbE05064977.1;NbE44072521.1;NbD025847.1;NbD002054.1	160
18.3978	17.8809	18.5932	17.3467	17.9584	17.2553				-1	19	19	19	61.6	61.6	61.6	27.619	0	250.5	11162000	17	83	NbD002068.1;NbE05066099.1	NbD002068.1;NbE05066099.1	161
NaN	NaN	NaN	NaN	NaN	NaN				-1	1	1	1	15.3	15.3	15.3	15.022	0.0012376	10.989	712380	10	6	NbE05068129.1;NbD002069.1;NbD025984.1	NbE05068129.1;NbD002069.1;NbD025984.1	162
NaN	NaN	NaN	NaN	NaN	NaN				-1	1	1	1	2.4	2.4	2.4	69.32	0.0011914	9.2481	68668	38	2	NbD002077.1;NbD041115.1	NbD002077.1;NbD041115.1	163
NaN	NaN	NaN	NaN	NaN	NaN				-1	9	3	3	46.5	16.1	16.1	24.108	0	24.83	785180	14	7	NbD002102.1;NbE03059190.1;NbD047221.1	NbD002102.1;NbE03059190.1;NbD047221.1	164
17.5132	18.356	17.2577	18.3682	17.1194	18.2418				-1	8	8	6	29.7	29.7	22.5	35.752	0	60.69	2867600	21	22	NbD002107.1;NbE05062792.1	NbD002107.1;NbE05062792.1	165
17.854	18.6954	17.461	18.5678	17.6266	18.5449				-1	21	21	2	21.4	21.4	3.3	137.14	0	232.33	7881300	67	78	NbD002127.1;NbD002128.1;NbE03057694.1;NbD050332.1	NbD002127.1;NbD002128.1;NbE03057694.1	167
16.5065	17.5792	NaN	17.9178	16.3897	17.7893				-1	10	10	3	12.5	12.5	3.2	122.46	0	91.634	2890700	50	32	NbD002142.1	NbD002142.1	168
17.0304	17.5014	16.8621	17.0952	16.6814	17.2313				-1	9	9	3	28.7	28.7	12.3	50.31	0	74.184	2045300	27	31	NbD002148.1	NbD002148.1	169
NaN	NaN	NaN	NaN	NaN	NaN				-1	4	4	3	15.3	15.3	11.6	45.784	0	22.163	129990	24	3	NbD002149.1;NbD043366.1;NbD000356.1;NbE03059323.1;NbE03060706.1;NbD007557.1	NbD002149.1;NbD043366.1	170
NaN	17.4672	17.3146	17.4246	17.4642	NaN				-1	5	5	5	10.4	10.4	10.4	52.819	0	39.816	1294200	26	12	NbD002170.1;NbE05066849.1;NbD002169.1	NbD002170.1;NbE05066849.1	171
NaN	16.2685	NaN	16.3891	NaN	16.3604				-1	3	3	3	4.9	4.9	4.9	81.945	0	27.822	697670	24	10	NbE05065529.1;NbD049487.1;NbD002186.1	NbE05065529.1;NbD049487.1;NbD002186.1	172
18.0199	19.5187	18.0106	18.5892	18.1931	19.3312				-1	3	3	1	21.7	21.7	9.8	15.906	0	32.157	3535000	9	17	NbD002190.1;NbD013740.1;NbE03056937.1	NbD002190.1;NbD013740.1	173
NaN	NaN	NaN	NaN	NaN	NaN				-1	2	2	1	9	9	4.5	35.548	0	15.14	84975	14	3	NbD002203.1;NbE03053734.1;NbD045874.1	NbD002203.1;NbE03053734.1;NbD045874.1	174
22.5026	22.4865	22.5635	22.6788	22.4977	22.6568				-1	12	12	6	47.7	47.7	23.8	18.103	0	193.67	82256000	10	115	NbD002217.1;NbD000150.1	NbD002217.1;NbD000150.1	175
NaN	NaN	15.4196	15.6077	NaN	NaN				-1	5	5	2	20.9	20.9	10.3	44.847	0	33.116	266280	23	9	NbD002220.1	NbD002220.1	176
16.1932	16.2125	16.1151	NaN	15.6487	NaN				-1	4	4	3	45	45	27.9	15.326	0	39.072	675610	9	12	NbD002230.1;NbD041143.1;NbD005691.1	NbD002230.1;NbD041143.1	177
NaN	NaN	NaN	NaN	NaN	NaN				-1	1	1	1	6.3	6.3	6.3	36.486	0.0017112	7.262	377580	20	5	NbD002242.1	NbD002242.1	178
NaN	NaN	NaN	NaN	NaN	NaN				-1	2	2	2	7.9	7.9	7.9	39.058	0	15.072	255220	20	7	NbD016857.1;NbD002261.1	NbD016857.1;NbD002261.1	179
16.5345	NaN	16.4489	NaN	16.7461	NaN				-1	3	3	3	20	20	20	29.703	0	21.519	458930	7	9	NbD002268.1	NbD002268.1	180
16.812	17.2303	16.7126	17.0774	16.6433	17.0452				-1	9	9	4	50.6	50.6	29.5	29.172	0	94.641	2482100	17	39	NbD002277.1;NbD033476.1	NbD002277.1;NbD033476.1	181
NaN	NaN	NaN	NaN	NaN	NaN				-1	4	4	4	15.2	15.2	15.2	38.067	0	25.858	311650	17	5	NbD002281.1;NbE44071408.1	NbD002281.1;NbE44071408.1	182
NaN	NaN	NaN	NaN	NaN	NaN				-1	2	2	1	12.9	12.9	8.5	22.151	0	14.026	522210	12	7	NbD002297.1;NbE03053482.1	NbD002297.1;NbE03053482.1	183
16.713	17.7968	NaN	17.5228	NaN	16.9649				-1	3	3	3	4.1	4.1	4.1	94.846	0	20.795	1095600	39	13	NbE05067986.1;NbE05065469.1;NbD046015.1;NbD002317.1;NbD014428.1;NbD013909.1;NbE03060353.1	NbE05067986.1;NbE05065469.1;NbD046015.1;NbD002317.1;NbD014428.1;NbD013909.1	184
NaN	NaN	NaN	NaN	17.007	16.7857				-1	1	1	1	8.3	8.3	8.3	15.312	0.0016656	7.0503	605760	5	6	NbD034235.1;NbD029435.1;NbD023426.1;NbD010952.1;NbD009299.1;NbD002333.1	NbD034235.1;NbD029435.1;NbD023426.1;NbD010952.1;NbD009299.1;NbD002333.1	185
NaN	16.6926	NaN	16.6143	NaN	16.5533				-1	3	3	2	33.1	33.1	26.6	16.075	0	26.686	724270	6	9	NbE03061602.1;NbD034105.1;NbD002350.1;NbD034452.1;NbD022342.1;NbD012412.1	NbE03061602.1;NbD034105.1;NbD002350.1	186
18.5548	18.923	18.7219	18.7903	18.5016	18.6525				-1	8	8	7	33.1	33.1	30.3	39.74	0	59.839	4516000	20	37	NbD010074.1;NbD002351.1	NbD010074.1;NbD002351.1	187
NaN	NaN	16.8455	NaN	16.3041	NaN				-1	3	3	3	10.6	10.6	10.6	37.778	0	20.919	819530	16	9	NbD002352.1;NbD010073.1	NbD002352.1	188
NaN	NaN	NaN	NaN	NaN	NaN				-1	1	1	1	5.7	5.7	5.7	31.365	0.0010787	7.6758	328040	14	5	NbE03054551.1;NbD002357.1	NbE03054551.1;NbD002357.1	189
NaN	NaN	NaN	NaN	NaN	NaN				-1	2	1	1	22.4	10.4	10.4	15.041	0.0010905	7.7777	112910	8	2	NbD002368.1	NbD002368.1	190
NaN	NaN	NaN	NaN	NaN	NaN				-1	3	3	3	11.5	11.5	11.5	44.617	0	17.712	135600	22	3	NbD002416.1;NbE03056672.1;NbD022093.1	NbD002416.1;NbE03056672.1;NbD022093.1	191
19.8264	18.9701	19.6331	18.5509	19.2233	18.6301				-1	7	7	7	60.2	60.2	60.2	19.63	0	295.48	9511100	10	36	NbD050701.1;NbD015031.1;NbD051894.1;NbD045377.1;NbD028500.1;NbD009974.1;NbD003304.1;NbD022085.1;NbD002419.1;NbE03053680.1;NbE05068052.1;NbD010029.1;NbD002638.1;NbD046068.1	NbD050701.1;NbD015031.1;NbD051894.1;NbD045377.1;NbD028500.1;NbD009974.1;NbD003304.1;NbD022085.1;NbD002419.1;NbE03053680.1;NbE05068052.1;NbD010029.1;NbD002638.1	192
16.4303	NaN	16.5726	NaN	16.9087	NaN				-1	15	15	4	12.1	12.1	3.5	229.76	0	112.65	1591100	109	32	NbD002426.1;NbE03056741.1;NbE05063462.1	NbD002426.1;NbE03056741.1;NbE05063462.1	193
NaN	NaN	17.7283	17.2327	17.6153	NaN				-1	9	9	7	20	20	17	67.117	0	57.014	1533900	31	18	NbD002431.1;NbE05068192.1;NbD040473.1;NbD044244.1;NbD038081.1	NbD002431.1;NbE05068192.1;NbD040473.1	194
NaN	NaN	NaN	NaN	NaN	NaN				-1	4	4	4	21.1	21.1	21.1	35.798	0	28.359	115020	18	4	NbD040480.1;NbD002436.1	NbD040480.1;NbD002436.1	195
16.9355	NaN	NaN	NaN	16.4618	16.3022				-1	2	2	1	7.2	7.2	3.4	41.749	0	17.596	611060	18	9	NbE44070538.1;NbD002437.1	NbE44070538.1;NbD002437.1	196
NaN	NaN	NaN	NaN	NaN	NaN				-1	1	1	1	4.7	4.7	4.7	65.836	0.0017141	7.2818	75721	31	2	NbE44071499.1;NbD002439.1	NbE44071499.1;NbD002439.1	197
NaN	NaN	NaN	NaN	NaN	NaN				-1	1	1	1	8	8	8	23.603	0.0016972	7.1905	128990	11	4	NbE03061900.1;NbD011979.1;NbD002443.1	NbE03061900.1;NbD011979.1;NbD002443.1	198
NaN	NaN	NaN	NaN	NaN	NaN				-1	2	2	0	9.5	9.5	0	37.724	0.001119	8	0	14	0	NbE03058067.1;NbE05065950.1;NbE05068744.1;NbD035491.1;NbD002446.1	NbE03058067.1;NbE05065950.1;NbE05068744.1;NbD035491.1;NbD002446.1	199
NaN	NaN	NaN	NaN	NaN	NaN				-1	2	2	2	14.5	14.5	14.5	31.176	0	14.598	311200	15	6	NbD019917.1;NbD002489.1	NbD019917.1;NbD002489.1	200
16.7994	16.9223	16.7536	16.58	16.0378	16.4851				-1	5	5	5	14.3	14.3	14.3	46.242	0	33.544	1123300	23	20	NbE03060327.1;NbD002533.1;NbD012804.1;NbE44069645.1;NbE03054708.1	NbE03060327.1;NbD002533.1;NbD012804.1;NbE44069645.1;NbE03054708.1	201
NaN	NaN	NaN	NaN	NaN	NaN				-1	2	2	2	10.8	10.8	10.8	28.166	0.001233	10.868	30161	16	2	NbD002549.1	NbD002549.1	202
NaN	18.4518	14.1842	18.5548	14.3015	18.6001				-1	14	14	14	19.3	19.3	19.3	100.32	0	159.62	4841900	50	46	NbD002583.1;NbD005526.1;NbE05068690.1	NbD002583.1;NbD005526.1;NbE05068690.1	203
16.2346	16.3907	16.3769	15.9916	16.5179	16.4116				-1	12	12	4	24	24	7.8	80.088	0	85.735	1592000	38	31	NbD002601.1;NbE05067600.1;NbE03056761.1	NbD002601.1;NbE05067600.1	204
17.9596	19.3276	18.5352	19.5007	18.8111	19.4823				-1	14	14	10	43.6	43.6	31.2	35.848	0	161.23	14571000	19	70	NbD002609.1	NbD002609.1	205
NaN	NaN	NaN	NaN	NaN	NaN				-1	2	2	2	8.9	8.9	8.9	28.323	0.0012346	10.924	139160	12	3	NbD038903.1;NbE44073147.1;NbE05067839.1;NbD002634.1;NbD010091.1;NbE44073148.1;NbD042756.1	NbD038903.1;NbE44073147.1;NbE05067839.1;NbD002634.1;NbD010091.1;NbE44073148.1;NbD042756.1	206
NaN	NaN	18.1029	NaN	17.6058	16.0292				-1	16	3	3	30.3	11.1	11.1	58.084	0	90.246	1291500	29	8	NbD002635.1	NbD002635.1	207
NaN	NaN	NaN	NaN	NaN	NaN				-1	1	1	1	3.8	3.8	3.8	50.117	0.0011351	8.1738	31687	21	2	NbE03060560.1;NbD002637.1	NbE03060560.1;NbD002637.1	208
NaN	15.8228	17.0601	16.5159	16.0537	17.1				-1	5	5	5	4.4	4.4	4.4	175.78	0	43.061	1127600	77	18	NbD002653.1;NbE05066214.1;NbD014090.1	NbD002653.1;NbE05066214.1;NbD014090.1	209
NaN	NaN	NaN	NaN	NaN	NaN				-1	2	2	2	15.3	15.3	15.3	13.135	0	13.564	61203	4	2	NbD019786.1;NbD002659.1	NbD019786.1;NbD002659.1	210
16.973	16.674	16.569	16.4112	16.385	16.2708				-1	8	8	8	31.2	31.2	31.2	92.774	0	60.508	1663400	56	31	NbD002660.1;NbD001140.1;NbE44073805.1	NbD002660.1;NbD001140.1;NbE44073805.1	211
NaN	NaN	NaN	NaN	NaN	NaN				-1	1	1	1	41.2	41.2	41.2	5.6924	0.0008285	11.096	32372	2	3	NbD030401.1;NbE03054193.1;NbE05063869.1;NbE03059584.1;NbD042271.1;NbD016265.1;NbD008956.1;NbE44071582.1;NbD012173.1;NbD033287.1;NbD003950.1;NbD002664.1;NbD014353.1;NbE03056293.1	NbD030401.1;NbE03054193.1;NbE05063869.1;NbE03059584.1;NbD042271.1;NbD016265.1;NbD008956.1;NbE44071582.1;NbD012173.1;NbD033287.1;NbD003950.1;NbD002664.1;NbD014353.1;NbE03056293.1	212
NaN	NaN	NaN	NaN	NaN	NaN				-1	1	1	1	4.4	4.4	4.4	29.167	0	13.244	251840	12	4	NbD048408.1;NbE03055741.1;NbD039345.1;NbD036467.1;NbD033659.1;NbD002691.1	NbD048408.1;NbE03055741.1;NbD039345.1;NbD036467.1;NbD033659.1;NbD002691.1	213
NaN	16.964	NaN	16.9719	NaN	16.9446				-1	5	5	5	8.1	8.1	8.1	118.75	0	38.588	1067200	57	14	NbD002695.1;NbE03058227.1;NbD011024.1	NbD002695.1;NbE03058227.1;NbD011024.1	214
NaN	NaN	NaN	NaN	NaN	NaN				-1	1	1	1	4.9	4.9	4.9	36.71	0.0011561	8.5622	495110	11	5	NbD011032.1;NbD002699.1	NbD011032.1;NbD002699.1	215
NaN	NaN	NaN	NaN	NaN	NaN				-1	5	5	5	24.7	24.7	24.7	38.581	0	37.518	451710	22	9	NbD002705.1;NbE05063097.1;NbD000665.1	NbD002705.1;NbE05063097.1	216
NaN	NaN	NaN	NaN	NaN	NaN				-1	3	3	3	4.1	4.1	4.1	130.46	0	17.719	289780	59	6	NbE03055675.1;NbD002710.1;NbD000660.1;NbE03060152.1	NbE03055675.1;NbD002710.1	217
NaN	NaN	NaN	NaN	NaN	NaN				-1	1	1	1	7	7	7	21.728	0.0010889	7.7666	116790	12	4	NbD021715.1;NbD002718.1	NbD021715.1;NbD002718.1	218
NaN	NaN	NaN	NaN	NaN	NaN				-1	1	1	1	6.2	6.2	6.2	36.161	0.0046671	6.465	7270.4	19	1	NbD002722.1	NbD002722.1	219
NaN	NaN	NaN	NaN	NaN	NaN				-1	2	2	2	13.7	13.7	13.7	22.375	0	13.601	155170	9	3	NbD002725.1;NbD016400.1;NbD031371.1;NbD026937.1;NbD002726.1	NbD002725.1;NbD016400.1;NbD031371.1;NbD026937.1;NbD002726.1	220
NaN	NaN	NaN	NaN	NaN	NaN				-1	2	2	2	7.2	7.2	7.2	31.943	0	13.266	168020	14	4	NbD002738.1	NbD002738.1	221
17.4604	18.3738	17.5372	18.3108	17.8768	18.1983				-1	5	5	5	20.3	20.3	20.3	32.916	0	136.38	3810600	18	23	NbD046389.1;NbD002741.1	NbD046389.1;NbD002741.1	222
NaN	NaN	NaN	NaN	NaN	NaN				-1	2	2	2	15.9	15.9	15.9	24.482	0	14.094	123830	13	4	NbD018666.1;NbD002755.1	NbD018666.1;NbD002755.1	223
17.7551	19.0203	17.8508	18.9578	17.5031	18.6142				-1	8	8	2	25.9	25.9	11.2	23.056	0	83.66	4857400	11	34	NbD037012.1;NbD002769.1	NbD037012.1;NbD002769.1	224
17.4172	NaN	16.3243	NaN	NaN	NaN				-1	3	3	3	13.7	13.7	13.7	22.713	0	20.289	862590	12	9	NbE05065582.1;NbD017574.1;NbD002825.1;NbD017575.1;NbE05065187.1;NbD042480.1;NbD018901.1	NbE05065582.1;NbD017574.1;NbD002825.1;NbD017575.1;NbE05065187.1;NbD042480.1;NbD018901.1	225
14.6083	15.2911	NaN	NaN	NaN	NaN				-1	2	2	2	7.2	7.2	7.2	44.844	0	17.041	280870	15	8	NbD002826.1;NbD017570.1;NbE44074286.1	NbD002826.1;NbD017570.1;NbE44074286.1	226
NaN	NaN	NaN	NaN	NaN	NaN				-1	10	1	1	52.9	17	17	17.093	0	11.705	271830	7	6	NbD002852.1;NbD010341.1;NbD037960.1;NbD013663.1;NbE05066125.1;NbD035679.1;NbE44074494.1;NbD028754.1;NbD039582.1;NbD020023.1;NbD017100.1;NbD048326.1;NbD034136.1;NbD001953.1;NbD034859.1;NbD017275.1;NbD012103.1;NbD021706.1;NbD044723.1;NbD019212.1;NbD022925.1;NbD014951.1;NbD002104.1;NbE05063738.1;NbE44070373.1	NbD002852.1;NbD010341.1;NbD037960.1;NbD013663.1;NbE05066125.1;NbD035679.1;NbE44074494.1;NbD028754.1;NbD039582.1;NbD020023.1;NbD017100.1;NbD048326.1;NbD034136.1;NbD001953.1;NbD034859.1;NbD017275.1;NbD012103.1;NbD021706.1;NbD044723.1;NbD019212.1;NbD022925.1;NbD014951.1	227
NaN	NaN	NaN	NaN	NaN	NaN				-1	4	1	1	8.9	1.6	1.6	68.334	0.0074582	6.1954	185440	25	4	NbD002877.1;NbE03059885.1;NbE05068629.1	NbD002877.1;NbE03059885.1;NbE05068629.1	228
NaN	NaN	NaN	NaN	NaN	NaN				-1	4	3	2	23.3	23.3	15	20.975	0	16.373	119530	8	3	NbE05063000.1;NbD017793.1;NbD002894.1	NbE05063000.1;NbD017793.1;NbD002894.1	230
16.8085	16.8537	16.8272	17.4318	16.5993	16.9459				-1	4	4	4	12.5	12.5	12.5	29.888	0	103.55	1267100	16	18	NbD002901.1;NbD051108.1;NbD050007.1;NbD042891.1;NbD022685.1;NbD052973.1	NbD002901.1;NbD051108.1;NbD050007.1;NbD042891.1;NbD022685.1;NbD052973.1	231
NaN	NaN	NaN	NaN	NaN	NaN				-1	1	1	1	1.4	1.4	1.4	103.29	0.0016474	6.9249	173120	54	3	NbE44072134.1;NbD002902.1;NbE05065720.1	NbE44072134.1;NbD002902.1;NbE05065720.1	232
NaN	NaN	NaN	NaN	NaN	NaN				-1	1	1	1	15.9	15.9	15.9	12.975	0.0011797	9.017	144230	9	3	NbD002938.1	NbD002938.1	233
17.2759	18.6969	17.2299	18.6997	17.3479	18.5362				-1	11	11	2	34.6	34.6	11.9	44.696	0	137.91	5444000	19	56	NbD002963.1;NbD015297.1	NbD002963.1;NbD015297.1	234
17.8411	17.65	17.9393	17.531	17.6414	17.3978				-1	10	10	9	41.7	41.7	35.5	32.428	0	90.102	4922400	13	45	NbD039430.1;NbD002971.1	NbD039430.1;NbD002971.1	235
NaN	NaN	NaN	NaN	NaN	NaN				-1	1	1	1	3.9	3.9	3.9	38.757	0.0011472	8.3643	198350	12	5	NbE05064835.1;NbD002974.1	NbE05064835.1;NbD002974.1	236
NaN	NaN	NaN	NaN	NaN	NaN				-1	2	2	1	5.3	5.3	3.2	89.126	0	15.595	211580	32	5	NbD002988.1;NbD002991.1;NbE44074178.1	NbD002988.1;NbD002991.1;NbE44074178.1	238
16.8153	17.6363	17.5502	17.9144	17.6017	17.6861				-1	13	9	8	53.9	43.9	34.4	38.596	0	117.19	3600500	21	37	NbD002999.1	NbD002999.1	239
15.656	17.5683	NaN	16.88	16.232	17.4626				-1	8	8	2	30.7	30.7	7.4	29.021	0	79.096	1781500	15	29	NbD003005.1;NbE44073568.1	NbD003005.1;NbE44073568.1	240
NaN	NaN	NaN	NaN	NaN	NaN				-1	1	1	1	6	6	6	33.264	0.0010925	7.7979	187060	16	4	NbD003032.1	NbD003032.1	241
17.3477	17.2281	16.9897	16.8843	16.8275	16.813				-1	4	4	2	20.1	20.1	14.7	25.237	0	39.036	1890300	8	26	NbD005456.1;NbD003040.1	NbD005456.1;NbD003040.1	242
NaN	NaN	NaN	NaN	NaN	NaN				-1	2	2	1	11.1	11.1	6.3	22.685	0.00082884	11.1	95437	12	2	NbD003069.1;NbE03059126.1	NbD003069.1;NbE03059126.1	243
NaN	NaN	NaN	NaN	NaN	NaN				-1	6	1	1	11	3.8	3.8	69.623	0.0010989	7.8515	378070	21	5	NbD003073.1;NbD027639.1;NbE44071084.1;NbD052675.1	NbD003073.1	244
NaN	NaN	NaN	NaN	NaN	NaN				-1	15	2	2	31.7	5.5	5.5	65.005	0	11.909	205040	34	5	NbE03056119.1;NbD003084.1	NbE03056119.1;NbD003084.1	245
16.5133	16.3045	16.7425	NaN	16.4565	15.8698				-1	3	3	1	10	10	4.1	44.803	0	23.007	824970	23	15	NbD003085.1;NbE03056120.1	NbD003085.1;NbE03056120.1	246
NaN	NaN	NaN	NaN	NaN	NaN				-1	2	2	1	3.3	3.3	1.6	116.49	0.00082576	11.014	64754	65	1	NbD034504.1;NbD003096.1	NbD034504.1;NbD003096.1	247
17.3788	16.8627	16.9678	16.8187	16.7646	17.0104				-1	7	7	7	22.6	22.6	22.6	50.776	0	57.639	1695000	28	23	NbD003109.1;NbD042006.1	NbD003109.1	248
NaN	NaN	NaN	NaN	NaN	NaN				-1	2	2	2	7.8	7.8	7.8	32.779	0	20.364	653100	18	6	NbE05065299.1;NbE03057443.1;NbD003131.1;NbD034796.1;NbE05066548.1	NbE05065299.1;NbE03057443.1;NbD003131.1;NbD034796.1;NbE05066548.1	249
19.7097	20.0778	19.8541	20.316	20.3226	20.222				-1	9	8	8	49.5	43.8	43.8	23.837	0	93.951	15038000	13	42	NbD003165.1;NbE03061138.1	NbD003165.1;NbE03061138.1	250
NaN	NaN	NaN	NaN	NaN	NaN				-1	2	2	0	5.8	5.8	0	44.174	0.0011182	8	0	15	0	NbD003194.1;NbE05063370.1;NbD007594.1	NbD003194.1;NbE05063370.1;NbD007594.1	251
NaN	NaN	NaN	NaN	NaN	NaN				-1	2	2	1	10.7	10.7	5.1	39.595	0	11.696	34494	22	1	NbE03061479.1;NbD046430.1;NbD003202.1	NbE03061479.1;NbD046430.1;NbD003202.1	252
18.0218	17.9361	18.0703	18.301	17.8801	18.2598				-1	8	8	8	17.1	17.1	17.1	73.377	0	119.94	3192800	33	28	NbD003208.1	NbD003208.1	253
NaN	NaN	NaN	NaN	NaN	NaN				-1	1	1	1	4.5	4.5	4.5	62.023	0.0011632	8.7275	34418	31	1	NbD003218.1;NbE03060855.1;NbE05065012.1	NbD003218.1;NbE03060855.1;NbE05065012.1	254
NaN	NaN	NaN	NaN	NaN	NaN				-1	2	2	2	7.7	7.7	7.7	29.63	0	11.984	58810	13	3	NbE03059647.1;NbD035946.1;NbD003225.1	NbE03059647.1;NbD035946.1;NbD003225.1	255
NaN	NaN	NaN	NaN	NaN	NaN				-1	7	1	1	35.4	14.3	14.3	25.645	0.0016779	7.125	137600	15	2	NbD003233.1;NbD026186.1;NbD021688.1	NbD003233.1;NbD026186.1;NbD021688.1	256
NaN	NaN	NaN	NaN	NaN	NaN				-1	1	1	1	8.6	8.6	8.6	29.518	0	14.317	179150	13	4	NbD003246.1;NbD030943.1;NbE05065390.1	NbD003246.1;NbD030943.1;NbE05065390.1	257
17.9916	17.9971	18.1005	17.8962	17.9532	18.0281				-1	17	17	15	56.6	56.6	48	34.224	0	156.96	8354700	15	78	NbD003274.1;NbD038065.1;NbE05064614.1	NbD003274.1;NbD038065.1;NbE05064614.1	258
16.5373	NaN	NaN	NaN	17.4176	NaN				-1	12	2	2	37.9	8.9	8.9	39.49	0	31.44	1463200	18	14	NbD003284.1	NbD003284.1	259
20.8927	NaN	20.7635	NaN	20.3422	19.5743				-1	8	1	1	36.8	7.8	7.8	22.009	0	16.21	10600000	13	12	NbD039991.1;NbD004409.1;NbD003287.1	NbD039991.1;NbD004409.1;NbD003287.1	260
NaN	NaN	NaN	15.4637	16.1509	15.6232				-1	1	1	1	7.1	7.1	7.1	29.132	0.0011477	8.3716	367800	13	7	NbE05063967.1;NbE03056993.1;NbD047379.1;NbD003298.1	NbE05063967.1;NbE03056993.1;NbD047379.1;NbD003298.1	261
17.1928	NaN	17.1108	16.7542	17.0132	16.9855				-1	6	6	6	33.2	33.2	33.2	28.662	0	47.711	1937400	15	23	NbE44070134.1;NbD047372.1;NbD003302.1;NbD029370.1;NbD044183.1;NbE44073108.1	NbE44070134.1;NbD047372.1;NbD003302.1;NbD029370.1	262
NaN	NaN	NaN	NaN	NaN	NaN				-1	1	1	1	4.8	4.8	4.8	20.653	0	12.032	123660	8	3	NbE03054093.1;NbD019693.1;NbD003313.1	NbE03054093.1;NbD019693.1;NbD003313.1	263
20.4286	20.7782	20.379	20.888	20.5824	20.9106				-1	12	12	3	53.8	53.8	26.7	25.774	0	323.31	33014000	11	63	NbE03056876.1;NbD003315.1;NbD026108.1	NbE03056876.1;NbD003315.1	264
19.2961	18.9971	19.1279	18.7272	18.8943	18.6014				-1	10	10	2	35.2	35.2	5.2	30.414	0	104.37	7919700	15	42	NbD003323.1	NbD003323.1	265
NaN	NaN	NaN	NaN	NaN	NaN				-1	1	1	1	4.8	4.8	4.8	27.654	0	14.216	438810	11	6	NbD037874.1;NbD003335.1	NbD037874.1;NbD003335.1	266
16.742	18.318	17.0509	18.7276	17.611	18.7594				-1	5	5	5	27.8	27.8	27.8	31.126	0	77.214	4156300	15	24	NbD037868.1;NbD003344.1;NbD015367.1;NbD017703.1;NbE05062860.1;NbE03053946.1;NbE05068189.1	NbD037868.1;NbD003344.1;NbD015367.1;NbD017703.1;NbE05062860.1;NbE03053946.1	267
NaN	NaN	NaN	NaN	NaN	NaN				-1	1	1	1	3.6	3.6	3.6	45.551	0.0010646	7.6272	41706	27	1	NbD037867.1;NbD003345.1	NbD037867.1;NbD003345.1	268
NaN	NaN	NaN	NaN	NaN	NaN				-1	2	2	2	5.9	5.9	5.9	29.357	0	15.698	209010	13	5	NbE44074514.1;NbD037856.1;NbD003354.1	NbE44074514.1;NbD037856.1;NbD003354.1	269
16.6105	16.5157	17.1443	NaN	17.1609	NaN				-1	1	1	1	16.7	16.7	16.7	11.68	0	17.206	662770	2	9	NbD022848.1;NbD017049.1;NbD003370.1;NbD022847.1;NbD050618.1;NbD032211.1	NbD022848.1;NbD017049.1;NbD003370.1;NbD022847.1;NbD050618.1;NbD032211.1	270
NaN	NaN	NaN	NaN	NaN	NaN				-1	1	1	1	2	2	2	70.804	0.0016863	7.1453	15707	22	1	NbE05065096.1;NbD003398.1;NbE05067710.1	NbE05065096.1;NbD003398.1;NbE05067710.1	271
NaN	NaN	NaN	NaN	NaN	NaN				-1	3	3	3	24.4	24.4	24.4	30.28	0	19.363	633400	13	7	NbD003433.1;NbD026038.1;NbE05063431.1	NbD003433.1;NbD026038.1;NbE05063431.1	272
18.3111	18.2424	17.4528	17.6966	17.2217	17.6425				-1	7	7	4	24.7	24.7	11.8	38.844	0	47.809	2978200	14	25	NbD003441.1;NbD013760.1;NbE05067527.1;NbE03059840.1;NbD023130.1	NbD003441.1;NbD013760.1;NbE05067527.1;NbE03059840.1	273
NaN	NaN	NaN	NaN	NaN	NaN				-1	5	1	1	15.2	5.7	5.7	42.3	0.0016485	6.9254	89710	22	1	NbE44073832.1;NbD003443.1;NbE03059025.1	NbE44073832.1;NbD003443.1;NbE03059025.1	274
NaN	NaN	15.2155	15.4765	NaN	NaN				-1	3	3	3	10.9	10.9	10.9	52.557	0	18.85	255500	24	8	NbE44073699.1;NbD019035.1;NbD003462.1;NbE44071708.1	NbE44073699.1;NbD019035.1;NbD003462.1;NbE44071708.1	275
NaN	NaN	NaN	NaN	NaN	NaN				-1	1	1	1	5.3	5.3	5.3	28.18	0.0016717	7.0926	106020	15	3	NbD021576.1;NbD003475.1	NbD021576.1;NbD003475.1	276
NaN	16.9278	NaN	NaN	17.2363	NaN				-1	4	4	4	16.6	16.6	16.6	49.504	0	39.699	1345600	24	11	NbE44070734.1;NbD003503.1;NbD026918.1	NbE44070734.1;NbD003503.1	277
NaN	NaN	NaN	NaN	NaN	NaN				-1	1	1	1	1.9	1.9	1.9	98.383	0.0011115	7.9495	164210	38	5	NbE05066804.1;NbD015103.1;NbD046312.1;NbD026442.1;NbD003518.1	NbE05066804.1;NbD015103.1;NbD046312.1;NbD026442.1;NbD003518.1	278
17.1393	18.1498	17.1232	17.9893	16.5897	17.9254				-1	4	4	2	23.7	23.7	14.5	28.291	0	48.036	2194500	9	21	NbD003525.1;NbD013869.1;NbD004501.1	NbD003525.1;NbD013869.1;NbD004501.1	279
NaN	NaN	NaN	NaN	NaN	NaN				-1	1	1	1	4.3	4.3	4.3	30.165	0.0016431	6.9052	206480	14	3	NbD018988.1;NbD003559.1	NbD018988.1;NbD003559.1	280
NaN	NaN	NaN	NaN	NaN	NaN				-1	1	1	1	8.6	8.6	8.6	18.302	0.0010858	7.735	126350	9	2	NbE05067554.1;NbD003574.1;NbD003572.1;NbD034084.1	NbE05067554.1;NbD003574.1;NbD003572.1;NbD034084.1	281
NaN	16.6767	NaN	16.3733	NaN	16.3578				-1	17	5	1	32.9	12.4	1.9	72.984	0	47.283	879500	39	15	NbD003577.1	NbD003577.1	282
15.9295	NaN	15.8534	NaN	NaN	NaN				-1	2	2	2	11.6	11.6	11.6	29.54	0	14.901	260020	9	6	NbE05065237.1;NbD003579.1;NbE05066102.1;NbD034895.1;NbE03053746.1	NbE05065237.1;NbD003579.1;NbE05066102.1;NbD034895.1;NbE03053746.1	283
NaN	NaN	NaN	NaN	NaN	NaN				-1	1	1	1	19.6	19.6	19.6	15.48	0.0010638	7.6235	8990.6	6	1	NbD045139.1;NbD003583.1	NbD045139.1;NbD003583.1	284
16.6609	17.734	16.4362	17.4693	16.4126	18.5329				-1	9	9	9	40.9	40.9	40.9	20.065	0	75.339	3266900	8	31	NbD003598.1;NbD049416.1;NbD013144.1;NbD046368.1	NbD003598.1;NbD049416.1;NbD013144.1;NbD046368.1	285
19.014	NaN	19.0635	NaN	19.1108	NaN				-1	10	10	2	59.3	59.3	12.8	24.646	0	130.24	6543600	14	32	NbD003599.1	NbD003599.1	286
17.5385	17.5128	17.4726	17.4266	17.4202	17.3652				-1	6	6	2	27.2	27.2	8.3	35.769	0	49.813	3009900	19	33	NbD003600.1	NbD003600.1	287
18.8857	18.1364	18.8048	18.3292	18.8068	18.207				-1	14	14	4	42.8	42.8	13	47.501	0	232.28	11675000	25	80	NbD003605.1;NbD025203.1	NbD003605.1;NbD025203.1	288
20.1169	20.0332	20.0111	19.6829	19.8208	NaN				-1	4	4	2	22	22	13.6	13.369	0	35.256	7486300	8	20	NbD003607.1;NbE03061286.1;NbD004351.1;NbD042181.1	NbD003607.1;NbE03061286.1;NbD004351.1;NbD042181.1	289
NaN	NaN	NaN	17.411	NaN	16.9419				-1	3	3	3	30.4	30.4	30.4	14.061	0	26.299	877600	6	10	NbD033301.1;NbD003611.1	NbD033301.1;NbD003611.1	290
NaN	NaN	NaN	NaN	NaN	NaN				-1	1	1	1	10.2	10.2	10.2	13.713	0.0038083	6.6125	16098	8	1	NbD003612.1	NbD003612.1	291
NaN	NaN	NaN	NaN	NaN	NaN				-1	1	1	1	7.2	7.2	7.2	20.053	0	45.928	527090	8	5	NbD003620.1;NbD012723.1	NbD003620.1;NbD012723.1	292
NaN	NaN	NaN	NaN	NaN	NaN				-1	3	3	3	17.1	17.1	17.1	20.864	0	20.264	377730	8	7	NbE03054627.1;NbD032662.1;NbD021620.1;NbD003621.1;NbD012722.1	NbE03054627.1;NbD032662.1;NbD021620.1;NbD003621.1;NbD012722.1	293
NaN	NaN	NaN	NaN	NaN	NaN				-1	2	2	2	7	7	7	35.58	0	13.394	542650	18	4	NbD003622.1;NbE03061483.1;NbD012720.1	NbD003622.1;NbE03061483.1;NbD012720.1	294
NaN	NaN	NaN	NaN	NaN	NaN				-1	1	1	1	3.6	3.6	3.6	46.027	0.0011751	8.9336	198420	19	6	NbD003643.1;NbE44074436.1;NbD047081.1;NbE44073251.1	NbD003643.1;NbE44074436.1;NbD047081.1;NbE44073251.1	295
NaN	NaN	NaN	NaN	NaN	NaN				-1	10	2	2	20.4	6.5	6.5	52.566	0	11.893	101000	27	5	NbD003658.1	NbD003658.1	296
NaN	NaN	NaN	NaN	NaN	NaN				-1	1	1	1	2	2	2	87.263	0.0011278	8.0644	79460	36	3	NbD003714.1;NbE05063697.1;NbD043968.1;NbE44070720.1	NbD003714.1;NbE05063697.1;NbD043968.1;NbE44070720.1	297
17.6036	16.6393	17.6179	NaN	17.3383	17.1008				-1	6	6	6	14.4	14.4	14.4	63.048	0	51.926	2175500	35	21	NbD020677.1;NbD003726.1	NbD020677.1;NbD003726.1	298
16.4476	NaN	16.9838	NaN	16.5946	NaN				-1	2	2	2	29.3	29.3	29.3	15.769	0	24.351	777290	4	12	NbD003757.1;NbE05066855.1;NbE03055953.1	NbD003757.1;NbE05066855.1;NbE03055953.1	299
15.7019	NaN	16.1739	NaN	16.2719	NaN				-1	5	5	4	7.3	7.3	6	109.76	0	36.416	617710	52	14	NbD003780.1	NbD003780.1	300
19.6839	NaN	19.9429	19.3265	19.7839	19.3551				-1	5	5	1	35.6	35.6	5.4	23.305	0	62.141	5007800	12	23	NbD003783.1;NbE05063102.1	NbD003783.1;NbE05063102.1	301
NaN	17.3836	NaN	16.8495	16.3685	16.6778				-1	15	2	2	37.5	7.7	7.7	46.88	0	16.299	856860	23	12	NbD003818.1;NbE44072656.1	NbD003818.1;NbE44072656.1	302
18.5539	17.4907	18.3027	NaN	17.6711	17.8846				-1	4	4	4	9.8	9.8	9.8	67.831	0	46.241	1928300	18	14	NbD006212.1;NbE05064822.1;NbD003821.1	NbD006212.1;NbE05064822.1;NbD003821.1	303
NaN	NaN	NaN	NaN	NaN	NaN				-1	3	3	2	5.1	5.1	4.4	56.974	0	18.27	292760	29	6	NbE44074313.1;NbE05064380.1;NbD042584.1;NbD003833.1	NbE44074313.1;NbE05064380.1;NbD042584.1;NbD003833.1	304
NaN	NaN	NaN	NaN	NaN	NaN				-1	1	1	1	0.7	0.7	0.7	266	0.0011411	8.2671	344450	115	5	NbD003836.1	NbD003836.1	305
16.859	16.5594	17.0408	17.0965	16.9435	16.8521				-1	3	3	1	22.2	22.2	12.4	17.22	0	54.679	1409000	9	19	NbD027291.1;NbD003852.1	NbD027291.1;NbD003852.1	306
NaN	NaN	17.1208	17.2121	16.5824	NaN				-1	3	3	3	13	13	13	36.146	0	22.813	711290	18	8	NbD041839.1;NbD003856.1;NbD049285.1;NbD041451.1	NbD041839.1;NbD003856.1;NbD049285.1;NbD041451.1	307
17.7438	18.3782	17.2893	18.3167	17.2111	18.1462				-1	5	5	5	9.3	9.3	9.3	70.907	0	51.56	2201100	35	19	NbD003870.1;NbE03053355.1;NbD002890.1	NbD003870.1;NbE03053355.1	308
16.5673	NaN	NaN	NaN	15.971	NaN				-1	7	7	5	15.4	15.4	9.5	46.412	0	44.19	671010	19	12	NbD003886.1;NbD015020.1;NbE03061623.1	NbD003886.1;NbD015020.1;NbE03061623.1	309
NaN	NaN	NaN	NaN	NaN	NaN				-1	2	2	2	5	5	5	55.984	0	13.471	97543	26	4	NbE05063612.1;NbD006614.1;NbD003907.1	NbE05063612.1;NbD006614.1;NbD003907.1	310
NaN	NaN	NaN	17.4431	NaN	17.3984				-1	3	3	3	13.2	13.2	13.2	29.169	0	18.77	631320	12	9	NbD023306.1;NbD003909.1;NbE44070307.1;NbD051820.1;NbD018470.1;NbD015840.1;NbE03056398.1;NbD035608.1	NbD023306.1;NbD003909.1;NbE44070307.1;NbD051820.1;NbD018470.1;NbD015840.1;NbE03056398.1;NbD035608.1	311
18.0136	18.2287	18.3847	18.1412	18.3904	18.0023				-1	3	3	2	9.8	9.8	6.1	47.626	0	36.776	4464500	24	25	NbD003912.1	NbD003912.1	312
17.9544	18.3182	17.9424	18.0887	18.1731	18.3085				-1	10	10	1	60.9	60.9	12.7	12.334	0	128.4	5503100	5	56	NbD031121.1;NbD003914.1	NbD031121.1;NbD003914.1	313
18.9021	18.496	18.7164	18.0697	18.2644	17.9843				-1	7	7	1	19.2	19.2	7.8	48.456	0	107.97	7012600	28	40	NbE44074037.1;NbD003922.1;NbE05068076.1	NbE44074037.1;NbD003922.1	314
NaN	NaN	NaN	NaN	NaN	NaN				-1	1	1	1	4.9	4.9	4.9	46.58	0.0012235	10.455	265500	23	6	NbD003938.1	NbD003938.1	315
19.8534	21.7476	19.7433	21.6042	19.7362	21.622				-1	45	45	2	53.5	53.5	8.3	80.268	0	323.31	131900000	34	314	NbD003943.1;NbD030459.1;NbE44071578.1;NbD008396.1	NbD003943.1;NbD030459.1;NbE44071578.1	316
17.6481	NaN	17.143	NaN	16.7067	17.4601				-1	7	7	7	20.5	20.5	20.5	39.449	0	43.919	1867000	18	22	NbD003945.1;NbD030458.1;NbD029274.1;NbD030894.1	NbD003945.1;NbD030458.1	317
17.264	NaN	17.7642	17.1897	18.0056	17.9773				-1	11	11	2	19.7	19.7	3.9	72.907	0	73.312	2657100	28	29	NbD003955.1	NbD003955.1	318
NaN	14.8639	NaN	NaN	NaN	15.3922				-1	2	2	2	1.4	1.4	1.4	282.44	0	15.788	264190	139	7	NbE05067848.1;NbD030312.1;NbD004006.1	NbE05067848.1;NbD030312.1;NbD004006.1	319
NaN	NaN	NaN	NaN	NaN	NaN				-1	1	1	1	4.5	4.5	4.5	35.659	0.0043695	6.4901	64574	21	2	NbD039413.1;NbD004015.1	NbD039413.1;NbD004015.1	320
NaN	NaN	NaN	NaN	NaN	NaN				-1	2	2	2	3.8	3.8	3.8	67.758	0	51.073	588530	38	7	NbD004016.1;NbD039414.1	NbD004016.1;NbD039414.1	321
17.6624	17.4975	17.561	17.3203	17.1847	17.3787				-1	4	2	2	11.8	8.4	8.4	43.766	0	61.764	1647100	22	12	NbD004021.1;NbE03061164.1;NbD002577.1	NbD004021.1;NbE03061164.1;NbD002577.1	322
16.8616	16.764	16.4892	16.5536	16.1598	16.4264				-1	11	2	2	12.9	1.4	1.4	135.17	0	25.443	825110	67	13	NbD004040.1	NbD004040.1	323
NaN	NaN	NaN	18.2882	18.219	NaN				-1	5	5	4	21.7	21.7	16.2	45.884	0	33.647	2375500	20	11	NbD004043.1;NbD051235.1	NbD004043.1;NbD051235.1	324
NaN	NaN	NaN	NaN	NaN	NaN				-1	4	4	4	11.2	11.2	11.2	66.029	0	26.892	322420	33	9	NbD009570.1;NbD004050.1	NbD009570.1;NbD004050.1	325
17.4085	NaN	17.4223	17.4331	17.102	17.2945				-1	2	2	2	17.2	17.2	17.2	22.517	0	17.842	1765600	15	16	NbD035446.1;NbD004085.1	NbD035446.1;NbD004085.1	326
NaN	15.8479	16.0909	NaN	15.9576	NaN				-1	2	2	2	5.5	5.5	5.5	50.323	0	14.698	522380	26	9	NbD004087.1	NbD004087.1	327
NaN	NaN	NaN	NaN	NaN	NaN				-1	2	2	2	11.1	11.1	11.1	24.654	0	17.848	666210	14	7	NbD020027.1;NbD004090.1	NbD020027.1;NbD004090.1	328
NaN	NaN	NaN	NaN	NaN	NaN				-1	1	1	1	6.6	6.6	6.6	25.159	0.001139	8.2548	461820	8	4	NbD004094.1;NbD020029.1	NbD004094.1;NbD020029.1	329
16.448	17.1819	16.191	16.6474	16.1299	17.1309				-1	5	4	4	15.3	11.9	11.9	58.081	0	42.364	1477900	29	20	NbD004111.1	NbD004111.1	330
NaN	NaN	NaN	NaN	NaN	NaN				-1	3	1	1	9.8	4.4	4.4	49.157	0.0017422	7.4739	45974	25	2	NbD029394.1;NbD004115.1	NbD029394.1;NbD004115.1	331
NaN	NaN	NaN	NaN	NaN	NaN				-1	4	1	1	26.6	6.2	6.2	21.531	0.0016223	6.8131	142900	13	4	NbD004126.1;NbE05066536.1	NbD004126.1;NbE05066536.1	332
NaN	NaN	NaN	NaN	NaN	NaN				-1	1	1	1	2.6	2.6	2.6	62.507	0.0043791	6.5015	69222	27	2	NbD011683.1;NbD004132.1	NbD011683.1;NbD004132.1	333
NaN	NaN	NaN	NaN	NaN	NaN				-1	2	2	1	26.3	26.3	11.1	11.168	0.0012077	9.7159	32893	6	1	NbD016549.1;NbD028842.1;NbD016550.1;NbE03062327.1;NbE44073799.1;NbD033542.1;NbD039213.1;NbD004133.1;NbD016551.1;NbD032194.1;NbD011682.1;NbD024017.1;NbD036082.1;NbD038353.1;NbD038830.1;NbE03062375.1;NbD050809.1;NbE05066920.1;NbD012411.1;NbE05062760.1;NbE05064583.1;NbE44071900.1;NbE03061406.1;NbE05068336.1;NbD052324.1;NbE44070581.1;NbE44074240.1;NbD011769.1;NbE44069116.1;NbE05065281.1;NbD041431.1	NbD016549.1;NbD028842.1;NbD016550.1;NbE03062327.1;NbE44073799.1;NbD033542.1;NbD039213.1;NbD004133.1;NbD016551.1;NbD032194.1;NbD011682.1;NbD024017.1;NbD036082.1;NbD038353.1;NbD038830.1;NbE03062375.1;NbD050809.1;NbE05066920.1;NbD012411.1;NbE05062760.1;NbE05064583.1;NbE44071900.1;NbE03061406.1;NbE05068336.1;NbD052324.1;NbE44070581.1;NbE44074240.1;NbD011769.1;NbE44069116.1;NbE05065281.1;NbD041431.1	334
NaN	NaN	NaN	NaN	NaN	NaN				-1	1	1	1	4.8	4.8	4.8	52.011	0	24.364	262810	21	6	NbE05068715.1;NbD047330.1;NbD004157.1	NbE05068715.1;NbD047330.1;NbD004157.1	335
NaN	NaN	NaN	NaN	NaN	NaN				-1	1	1	1	12.4	12.4	12.4	23.286	0.0016678	7.0647	32172	12	1	NbD004168.1;NbE03053867.1	NbD004168.1;NbE03053867.1	336
NaN	NaN	NaN	NaN	NaN	NaN				-1	8	1	1	16.5	4.1	4.1	55.165	0	15.993	1093100	26	6	NbD004179.1	NbD004179.1	337
NaN	NaN	NaN	NaN	NaN	NaN				-1	2	2	2	15.4	15.4	15.4	16.319	0	13.148	274840	7	5	NbD004232.1;NbD004728.1;NbD033813.1;NbD015239.1	NbD004232.1;NbD004728.1;NbD033813.1;NbD015239.1	338
17.6987	17.1889	17.6606	17.3599	17.5435	17.333				-1	5	5	5	17.5	17.5	17.5	54.765	0	46.587	2108300	27	21	NbD004239.1	NbD004239.1	339
NaN	NaN	NaN	NaN	NaN	NaN				-1	2	2	2	5	5	5	57.41	0	12.715	172920	20	6	NbD004255.1;NbE05062813.1;NbD053052.1;NbD026545.1;NbD004256.1;NbE03054630.1;NbD053053.1;NbE44073138.1;NbD041257.1	NbD004255.1;NbE05062813.1;NbD053052.1;NbD026545.1;NbD004256.1;NbE03054630.1;NbD053053.1;NbE44073138.1;NbD041257.1	340
NaN	NaN	NaN	NaN	NaN	NaN				-1	1	1	1	1.3	1.3	1.3	134.52	0.0014085	7.5796	48524	51	2	NbE03057896.1;NbD052404.1;NbD004260.1	NbE03057896.1;NbD052404.1;NbD004260.1	341
NaN	NaN	NaN	NaN	NaN	NaN				-1	8	1	1	8	0.9	0.9	155.27	0.0017164	7.2879	21382	65	1	NbE44073266.1;NbD004266.1	NbE44073266.1;NbD004266.1	342
17.3747	17.1083	16.8639	17.2384	NaN	17.0014				-1	2	2	2	17.2	17.2	17.2	14.385	0	16.39	1082500	6	11	NbD040236.1;NbD004272.1	NbD040236.1;NbD004272.1	343
NaN	NaN	NaN	NaN	NaN	NaN				-1	1	1	1	8.3	8.3	8.3	18.971	0.0046497	6.4454	118450	3	1	NbD004275.1;NbD040239.1;NbE05064420.1	NbD004275.1;NbD040239.1;NbE05064420.1	344
NaN	NaN	NaN	16.3081	NaN	16.2481				-1	25	1	1	39.7	2.5	2.5	71.313	0.0011516	8.4298	447950	37	8	NbD004276.1	NbD004276.1	345
NaN	15.9033	NaN	15.7695	NaN	NaN				-1	3	3	3	4.1	4.1	4.1	112.88	0	20.438	256830	43	8	NbE05065782.1;NbD004284.1;NbD037981.1;NbE44074260.1;NbD037980.1;NbE44069743.1	NbE05065782.1;NbD004284.1;NbD037981.1;NbE44074260.1	346
NaN	NaN	15.819	NaN	16.6233	NaN				-1	4	4	1	17.2	17.2	4	30.623	0	63.006	593440	18	9	NbD004296.1	NbD004296.1	347
16.8566	16.6287	17.0391	NaN	16.5137	16.3082				-1	4	4	4	12.1	12.1	12.1	52.503	0	31.301	971240	21	13	NbE03059418.1;NbD009568.1;NbD004320.1;NbE03054437.1;NbD004318.1	NbE03059418.1;NbD009568.1;NbD004320.1;NbE03054437.1;NbD004318.1	348
NaN	NaN	16.0686	NaN	15.5007	NaN				-1	4	4	1	23.2	23.2	8.1	23.343	0	25.751	269670	13	6	NbD004328.1;NbD020520.1;NbE44073883.1;NbE05067015.1;NbE03058081.1;NbD051058.1;NbD046112.1;NbD006710.1	NbD004328.1;NbD020520.1	349
NaN	NaN	NaN	NaN	NaN	NaN				-1	1	1	1	5.1	5.1	5.1	24.743	0.0038119	6.6157	162400	11	4	NbE05067665.1;NbD038381.1;NbD004341.1	NbE05067665.1;NbD038381.1;NbD004341.1	350
NaN	NaN	NaN	NaN	NaN	NaN				-1	3	3	3	8.6	8.6	8.6	58.103	0	18.818	133090	23	4	NbD016896.1;NbE03060250.1;NbD004370.1;NbE03061484.1;NbD016301.1;NbD022444.1	NbD016896.1;NbE03060250.1;NbD004370.1	351
16.4634	17.0232	17.2085	16.7785	17.2329	17.1758				-1	9	5	4	21.2	8.3	8.3	50.452	0	42.464	1103700	26	17	NbD004374.1	NbD004374.1	352
NaN	NaN	NaN	NaN	NaN	NaN				-1	2	1	0	3.8	1.7	0	97.361	0.0016372	6.8869	48495	44	1	NbE05068122.1;NbD045394.1;NbD004375.1	NbE05068122.1;NbD045394.1;NbD004375.1	353
16.8487	16.6934	NaN	16.5077	15.7969	16.3612				-1	7	4	2	35.3	23.4	9.2	24.211	0	42.79	1127700	15	16	NbD004376.1;NbD045396.1;NbD019823.1;NbD016751.1;NbD044714.1;NbD033908.1	NbD004376.1	354
NaN	NaN	NaN	NaN	NaN	NaN				-1	1	1	1	2.2	2.2	2.2	80.507	0.0016611	7.0032	72908	27	2	NbE03055893.1;NbD004387.1	NbE03055893.1;NbD004387.1	355
NaN	NaN	NaN	NaN	NaN	NaN				-1	1	1	1	1.8	1.8	1.8	113.22	0.0016523	6.9494	148570	46	3	NbE44070553.1;NbD004392.1	NbE44070553.1;NbD004392.1	356
22.0531	21.7451	22.1425	21.9842	22.0678	21.8658				-1	28	14	6	56.3	35.2	11.1	42.813	0	308.1	60563000	23	85	NbD004396.1	NbD004396.1	357
17.8846	17.9104	17.6528	NaN	17.526	NaN				-1	5	5	5	44.5	44.5	44.5	13.823	0	53.114	1617600	6	16	NbE03058799.1;NbD004399.1;NbD030132.1;NbE03061822.1;NbD014381.1;NbD008369.1;NbE05067007.1	NbE03058799.1;NbD004399.1;NbD030132.1;NbE03061822.1	358
17.8588	18.3716	17.6765	18.5026	18.1952	18.66				-1	9	2	2	29.4	11	11	34.758	0	21.059	3578600	14	17	NbD004403.1	NbD004403.1	359
NaN	NaN	NaN	NaN	NaN	NaN				-1	1	1	1	2.3	2.3	2.3	62.064	0	14.322	254960	25	6	NbD004406.1;NbE44071893.1;NbE03061682.1;NbD046690.1	NbD004406.1;NbE44071893.1;NbE03061682.1;NbD046690.1	360
19.7602	19.1124	19.5286	19.1161	19.4633	19.105				-1	17	17	7	44.3	44.3	22.3	39.556	0	323.31	18250000	19	99	NbD004407.1	NbD004407.1	361
NaN	18.1363	NaN	19.2511	18.9609	19.1209				-1	3	3	3	17.7	17.7	17.7	20.568	0	20.307	2954500	9	12	NbD013980.1;NbD004416.1	NbD013980.1;NbD004416.1	362
16.8955	NaN	16.7321	15.9974	16.4021	15.444				-1	4	4	4	8.9	8.9	8.9	55.593	0	35.998	1060400	21	19	NbD046957.1;NbD004464.1	NbD046957.1;NbD004464.1	363
NaN	NaN	NaN	NaN	NaN	NaN				-1	1	1	1	1.2	1.2	1.2	110.98	0.0010921	7.7966	210780	57	4	NbD004478.1;NbE05066379.1;NbD052420.1	NbD004478.1;NbE05066379.1;NbD052420.1	364
NaN	NaN	NaN	NaN	NaN	NaN				-1	6	1	1	35.1	5.2	5.2	31.336	0.0011769	8.9631	404160	19	3	NbD004513.1	NbD004513.1	365
NaN	NaN	NaN	NaN	NaN	NaN				-1	1	1	1	4.6	4.6	4.6	38.157	0.001625	6.828	187120	21	2	NbE44069642.1;NbD017843.1;NbD004538.1	NbE44069642.1;NbD017843.1;NbD004538.1	366
NaN	NaN	NaN	NaN	NaN	NaN				-1	8	1	0	9.2	1.2	0	132.09	0.0011099	7.9415	485320	62	6	NbD004543.1	NbD004543.1	367
NaN	17.9272	NaN	18.2838	NaN	18.1016				-1	4	4	4	53.8	53.8	53.8	7.4666	0	32.414	2203400	3	21	NbD051686.1;NbD029155.1;NbD012968.1;NbD006401.1;NbD004560.1;NbD000411.1	NbD051686.1;NbD029155.1;NbD012968.1;NbD006401.1;NbD004560.1;NbD000411.1	368
15.6503	15.745	15.4811	NaN	15.555	15.4619				-1	5	5	4	35.7	35.7	27.7	26.015	0	37.036	673020	14	17	NbD004566.1	NbD004566.1	369
NaN	NaN	NaN	NaN	NaN	NaN				-1	1	1	1	1.2	1.2	1.2	158.02	0.001085	7.7227	389180	67	6	NbE05064019.1;NbD004567.1	NbE05064019.1;NbD004567.1	370
NaN	NaN	NaN	NaN	NaN	NaN				-1	1	1	1	3.8	3.8	3.8	49.028	0	23.399	164490	14	4	NbD004574.1	NbD004574.1	371
17.9409	16.6766	17.9453	15.8743	17.0825	16.0097				-1	8	8	8	16.9	16.9	16.9	77.692	0	101.74	2637800	38	39	NbD040735.1;NbE05064849.1;NbD004589.1	NbD040735.1;NbE05064849.1;NbD004589.1	372
19.2811	18.632	19.1265	18.5004	18.9952	18.4441				-1	11	11	0	43	43	0	34.283	0	123.56	6551500	19	41	NbD004591.1;NbD032220.1;NbD039904.1	NbD004591.1;NbD032220.1	373
19.6092	19.3316	19.3755	19.2431	19.3848	19.2297				-1	37	37	3	36.2	36.2	3.7	105.07	0	323.31	34478000	48	227	NbD004594.1;NbE05068705.1;NbD049696.1;NbD014616.1	NbD004594.1	374
NaN	NaN	NaN	NaN	NaN	NaN				-1	3	3	3	9.2	9.2	9.2	32.336	0	21.346	295770	11	9	NbE44069227.1;NbD004609.1	NbE44069227.1;NbD004609.1	375
NaN	NaN	NaN	NaN	NaN	NaN				-1	1	1	1	1.8	1.8	1.8	79.619	0.0091203	6.1124	2485500	38	5	NbE03055619.1;NbD004642.1	NbE03055619.1;NbD004642.1	376
NaN	NaN	NaN	NaN	NaN	NaN				-1	1	1	1	11.1	11.1	11.1	21.509	0	11.507	32149	6	2	NbD020273.1;NbD004644.1	NbD020273.1;NbD004644.1	377
17.9839	NaN	17.7709	NaN	17.7153	NaN				-1	11	10	6	28.6	24.1	14.2	53.336	0	130.98	3162900	25	35	NbD004650.1	NbD004650.1	378
NaN	NaN	NaN	NaN	NaN	NaN				-1	2	2	2	7.7	7.7	7.7	45.578	0	12.596	534320	18	4	NbD004669.1;NbE03053950.1;NbD029078.1	NbD004669.1;NbE03053950.1;NbD029078.1	379
NaN	NaN	NaN	NaN	NaN	NaN				-1	1	1	1	6.5	6.5	6.5	27.049	0.0016213	6.8126	144670	12	3	NbD004673.1;NbE03059912.1	NbD004673.1;NbE03059912.1	380
NaN	16.8584	16.3177	NaN	NaN	16.6352				-1	9	4	4	30.4	15.3	15.3	44.83	0	41.225	859030	19	11	NbD004677.1;NbE03062168.1;NbD016829.1	NbD004677.1;NbE03062168.1;NbD016829.1	381
NaN	NaN	NaN	NaN	NaN	NaN				-1	4	4	4	7.6	7.6	7.6	70.251	0	23.33	519070	39	8	NbD018978.1;NbD004702.1;NbD025788.1;NbD050014.1;NbE44073541.1;NbD008263.1;NbD053114.1	NbD018978.1;NbD004702.1	382
NaN	NaN	NaN	NaN	NaN	NaN				-1	1	1	1	5.2	5.2	5.2	35.911	0.0014045	7.5619	4816000	15	7	NbE05065873.1;NbD004733.1;NbE03060891.1;NbE44069130.1	NbE05065873.1;NbD004733.1;NbE03060891.1;NbE44069130.1	383
NaN	NaN	NaN	NaN	NaN	NaN				-1	1	1	1	2.8	2.8	2.8	42.948	0.0068966	6.237	75077	25	2	NbD004760.1	NbD004760.1	384
NaN	NaN	16.6904	16.6392	16.6	NaN				-1	6	6	5	7	7	6	121.81	0	40.803	1020000	63	16	NbE03058143.1;NbD004776.1;NbD041294.1;NbD001665.1;NbE44074322.1;NbE03060498.1	NbE03058143.1;NbD004776.1;NbD041294.1	385
NaN	NaN	NaN	NaN	NaN	NaN				-1	1	1	1	1.2	1.2	1.2	173.3	0.0091392	6.121	55540	80	3	NbE03057502.1;NbD004784.1	NbE03057502.1;NbD004784.1	386
15.4523	NaN	15.5721	NaN	NaN	NaN				-1	2	2	2	3.8	3.8	3.8	79.575	0	15.56	241360	35	6	NbD004802.1	NbD004802.1	387
14.6538	NaN	NaN	NaN	14.3835	14.6191				-1	2	2	2	9	9	9	25.95	0	12.22	173300	8	9	NbD004831.1	NbD004831.1	388
16.7393	NaN	16.6327	15.5837	17.4828	15.6005				-1	6	6	6	22.1	22.1	22.1	38.82	0	41.454	1290700	23	20	NbD004832.1;NbE03058252.1;NbD018561.1	NbD004832.1;NbE03058252.1;NbD018561.1	389
16.6105	NaN	16.9529	NaN	16.6966	16.7684				-1	3	3	1	31	31	13.8	15.547	0	35.253	948350	7	15	NbE05065180.1;NbE03056104.1;NbD035735.1;NbD012106.1;NbD051849.1;NbD004836.1	NbE05065180.1;NbE03056104.1;NbD035735.1;NbD012106.1;NbD051849.1;NbD004836.1	390
NaN	NaN	NaN	NaN	NaN	NaN				-1	2	2	2	12.6	12.6	12.6	16.148	0	12.802	389530	8	5	NbD048450.1;NbD047204.1;NbD018733.1;NbD027911.1;NbD032790.1;NbD039930.1;NbD036061.1;NbD030300.1;NbD005441.1;NbD004846.1	NbD048450.1;NbD047204.1;NbD018733.1;NbD027911.1;NbD032790.1;NbD039930.1;NbD036061.1;NbD030300.1;NbD005441.1;NbD004846.1	391
NaN	NaN	NaN	16.0804	16.2829	16.361				-1	2	2	2	13.3	13.3	13.3	26.521	0	55.17	699640	14	9	NbD004853.1	NbD004853.1	392
NaN	NaN	NaN	NaN	NaN	NaN				-1	2	2	2	7.9	7.9	7.9	34.356	0.00082713	11.072	166300	17	5	NbD004880.1;NbE03057179.1;NbD052064.1	NbD004880.1;NbE03057179.1;NbD052064.1	393
NaN	NaN	NaN	NaN	NaN	NaN				-1	2	2	2	4.5	4.5	4.5	82.047	0	12.74	57288	34	2	NbD017302.1;NbD004881.1	NbD017302.1;NbD004881.1	394
16.9617	17.2443	NaN	16.7586	16.4488	16.5727				-1	1	1	1	8.1	8.1	8.1	20.005	0.0011407	8.2659	1118600	7	11	NbD028896.1;NbD004889.1	NbD028896.1;NbD004889.1	395
NaN	NaN	NaN	19.8487	NaN	19.7064				-1	4	4	3	26.5	26.5	26.5	20.788	0	56.93	3269800	7	8	NbD047317.1;NbD043676.1;NbD035875.1;NbD034877.1;NbD017934.1;NbD010159.1;NbD004894.1;NbD049101.1;NbE03053924.1;NbD043899.1	NbD047317.1;NbD043676.1;NbD035875.1;NbD034877.1;NbD017934.1;NbD010159.1;NbD004894.1;NbD049101.1;NbE03053924.1;NbD043899.1	396
NaN	NaN	NaN	NaN	NaN	NaN				-1	2	2	1	6.7	6.7	3.5	57.401	0.00119	9.2263	12860	20	1	NbD004937.1	NbD004937.1	397
NaN	NaN	NaN	NaN	NaN	NaN				-1	1	1	1	3.3	3.3	3.3	31.405	0.0054201	6.2841	415570	14	4	NbD004939.1;NbD021553.1	NbD004939.1;NbD021553.1	398
NaN	NaN	NaN	NaN	NaN	NaN				-1	3	3	3	16.5	16.5	16.5	28.056	0	22.16	247420	10	6	NbD044526.1;NbD004942.1;NbE03057785.1;NbD019191.1;NbE05067764.1;NbD047394.1	NbD044526.1;NbD004942.1	399
NaN	NaN	NaN	NaN	NaN	NaN				-1	3	2	2	8.9	5.4	5.4	60.491	0	13.135	65482	29	3	NbE03054654.1;NbD004948.1	NbE03054654.1;NbD004948.1	400
18.908	18.5979	18.5883	18.6051	18.6825	18.5203				-1	10	10	10	38.6	38.6	38.6	33.499	0	109.31	9898200	17	48	NbD004954.1;NbD024654.1;NbE03057196.1	NbD004954.1;NbD024654.1;NbE03057196.1	401
NaN	NaN	NaN	NaN	NaN	NaN				-1	1	1	1	10.8	10.8	10.8	25.503	0	24.969	428100	13	6	NbE44072563.1;NbD004963.1;NbE05064610.1;NbE03056433.1;NbE05067934.1	NbE44072563.1;NbD004963.1;NbE05064610.1;NbE03056433.1;NbE05067934.1	402
16.3775	NaN	16.2348	NaN	15.6644	15.716				-1	5	5	3	25.5	25.5	14.8	36.275	0	36.411	892000	18	17	NbD004973.1	NbD004973.1	403
NaN	NaN	NaN	NaN	NaN	NaN				-1	8	1	1	17.9	3	3	67.689	0.0041074	6.5727	88702	30	1	NbD004978.1	NbD004978.1	404
16.3906	NaN	NaN	15.331	15.4157	NaN				-1	8	8	8	17.2	17.2	17.2	65.776	0	63.223	764570	32	17	NbD004985.1;NbD024423.1	NbD004985.1;NbD024423.1	405
NaN	NaN	NaN	NaN	NaN	NaN				-1	1	1	1	8.2	8.2	8.2	34.998	0.0011592	8.6169	186030	17	2	NbE03053902.1;NbD039645.1;NbD012393.1;NbD005200.1;NbD004990.1	NbE03053902.1;NbD039645.1;NbD012393.1;NbD005200.1;NbD004990.1	406
NaN	NaN	NaN	NaN	NaN	NaN				-1	4	4	3	9.6	9.6	7.4	62.718	0	24.473	399500	34	8	NbE44074502.1;NbD005010.1;NbE03061041.1;NbD014748.1;NbD023504.1;NbE05068659.1	NbE44074502.1;NbD005010.1;NbE03061041.1;NbD014748.1	407
16.0394	16.1392	NaN	NaN	16.257	16.0393				-1	7	4	4	27.5	17.5	17.5	41.719	0	29.654	682120	20	15	NbD005018.1;NbD014754.1	NbD005018.1;NbD014754.1	408
NaN	NaN	NaN	NaN	NaN	NaN				-1	4	2	2	2.4	1.4	1.4	218.86	0	12.503	65781	89	2	NbD005055.1;NbE05064904.1;NbD047945.1	NbD005055.1;NbE05064904.1;NbD047945.1	409
15.7338	16.1638	15.683	16.2731	15.7242	16.1176				-1	7	7	7	7.6	7.6	7.6	134.02	0	64.752	1024100	66	24	NbE44070598.1;NbD005088.1;NbE03057058.1;NbE05068234.1;NbD029442.1	NbE44070598.1;NbD005088.1;NbE03057058.1;NbE05068234.1;NbD029442.1	410
NaN	NaN	NaN	NaN	NaN	NaN				-1	1	1	1	2.6	2.6	2.6	47.786	0.004375	6.4967	80052	12	2	NbD005122.1;NbE44073505.1	NbD005122.1;NbE44073505.1	411
NaN	NaN	NaN	NaN	NaN	NaN				-1	2	2	2	11.9	11.9	11.9	35.281	0	15.738	369830	15	5	NbD042814.1;NbD046170.1;NbD027803.1;NbD005144.1;NbE03055827.1	NbD042814.1;NbD046170.1;NbD027803.1;NbD005144.1;NbE03055827.1	412
NaN	NaN	NaN	NaN	NaN	NaN				-1	1	1	1	0.6	0.6	0.6	235.08	0.0017301	7.3693	183180	105	5	NbE05064322.1;NbD005164.1;NbE03053823.1;NbD042983.1	NbE05064322.1;NbD005164.1;NbE03053823.1;NbD042983.1	413
16.3253	16.7063	16.593	16.5014	15.9062	16.4802				-1	5	5	1	19.1	19.1	4.1	42.745	0	34.6	1131300	22	26	NbD005165.1	NbD005165.1	414
18.9949	19.3541	19.3666	19.7432	19.4455	19.6572				-1	11	11	11	35	35	35	33.115	0	167.45	21267000	15	112	NbD005184.1;NbD013187.1	NbD005184.1;NbD013187.1	415
18.9989	18.3175	18.9626	17.9391	18.6768	17.7935				-1	4	4	4	21.6	21.6	21.6	34.946	0	84.055	4923500	16	33	NbD027489.1;NbD005204.1	NbD027489.1;NbD005204.1	416
NaN	NaN	NaN	NaN	NaN	NaN				-1	1	1	1	3.2	3.2	3.2	58.746	0.001071	7.6599	44078	14	2	NbE03059700.1;NbD005210.1	NbE03059700.1;NbD005210.1	417
NaN	NaN	NaN	NaN	NaN	NaN				-1	4	1	1	8.5	2.7	2.7	65.552	0.001654	6.9564	526570	30	5	NbD005225.1	NbD005225.1	418
NaN	NaN	NaN	16.0372	16.0882	NaN				-1	2	2	2	6.9	6.9	6.9	39.408	0	15.34	406240	20	8	NbD039376.1;NbD005250.1;NbE44074530.1;NbD032037.1	NbD039376.1;NbD005250.1;NbE44074530.1;NbD032037.1	419
NaN	NaN	NaN	NaN	NaN	NaN				-1	8	3	2	40.6	15.7	9.2	24.13	0	17.166	354380	12	4	NbD045764.1;NbD005266.1;NbD033100.1;NbD039325.1;NbD021932.1	NbD045764.1;NbD005266.1	420
15.6899	15.6728	15.5481	15.9272	NaN	15.7411				-1	4	2	1	19.8	15.2	8.6	29.422	0	21.141	520730	10	13	NbD005273.1	NbD005273.1	421
17.8969	17.3333	17.7209	17.3783	17.8027	17.2116				-1	6	6	6	24.2	24.2	24.2	45.412	0	129.03	2577700	13	33	NbD005276.1;NbE03053938.1;NbD029405.1	NbD005276.1;NbE03053938.1;NbD029405.1	422
NaN	NaN	NaN	NaN	NaN	NaN				-1	2	2	2	5.1	5.1	5.1	91.466	0	15.387	179350	42	4	NbD005277.1;NbD035390.1	NbD005277.1;NbD035390.1	423
15.8074	15.7342	16.0891	16.0114	16.3902	16.1201				-1	8	8	8	21.1	21.1	21.1	67.827	0	75.936	1480800	32	29	NbD005288.1;NbD016658.1	NbD005288.1;NbD016658.1	424
NaN	NaN	NaN	NaN	NaN	NaN				-1	1	1	1	8.5	8.5	8.5	25.014	0.0080309	6.1806	11025	13	1	NbE44070822.1;NbD005296.1	NbE44070822.1;NbD005296.1	425
NaN	NaN	16.6382	NaN	NaN	16.0792				-1	3	3	3	7.8	7.8	7.8	56.648	0	21.925	711640	26	13	NbD005326.1	NbD005326.1	426
NaN	17.5876	17.6044	16.5584	17.3353	17.1822				-1	3	3	3	9.8	9.8	9.8	26.416	0	26.734	1603400	9	13	NbD038510.1;NbD005340.1	NbD038510.1;NbD005340.1	427
NaN	NaN	NaN	NaN	NaN	NaN				-1	3	1	1	12.3	7.3	7.3	37.788	0.0011919	9.2716	36787	19	2	NbD005344.1	NbD005344.1	428
15.7755	NaN	16.1844	NaN	16.1487	16.0061				-1	37	3	3	36.2	3.7	3.7	105.02	0	20.684	477010	48	10	NbD005345.1;NbE05063837.1	NbD005345.1;NbE05063837.1	429
NaN	NaN	NaN	NaN	NaN	NaN				-1	10	1	1	43.9	5.3	5.3	31.485	0.001703	7.2068	375820	19	5	NbD005346.1;NbE44070862.1	NbD005346.1;NbE44070862.1	430
NaN	NaN	NaN	NaN	NaN	NaN				-1	11	2	1	47.4	6.3	4.6	31.477	0	12.814	197810	20	7	NbD005348.1;NbE03058505.1;NbD013436.1	NbD005348.1;NbE03058505.1	431
NaN	16.5823	NaN	16.8361	16.5371	16.7939				-1	2	2	2	12.7	12.7	12.7	33.419	0	30.978	544220	18	10	NbD005361.1;NbE03059628.1	NbD005361.1;NbE03059628.1	432
19.7929	19.7273	NaN	NaN	19.8295	NaN				-1	3	3	3	11.3	11.3	11.3	34.899	0	19.803	5011600	7	9	NbD005368.1;NbD035886.1;NbE44069210.1	NbD005368.1;NbD035886.1;NbE44069210.1	433
15.862	15.445	16.0462	16.1113	16.3522	15.964				-1	6	6	6	16.6	16.6	16.6	35.214	0	36.664	922780	11	20	NbE05067824.1;NbD005372.1;NbE03055060.1;NbD005372.2;NbD035890.1	NbE05067824.1;NbD005372.1;NbE03055060.1;NbD005372.2;NbD035890.1	434
NaN	NaN	NaN	17.2664	NaN	16.9767				-1	2	2	2	14.9	14.9	14.9	11.526	0	11.929	655890	3	6	NbD052432.1;NbD025616.1;NbD048690.1;NbD005381.1;NbE03054751.1;NbE03061170.1;NbD024878.1;NbD015058.1;NbD005581.1	NbD052432.1;NbD025616.1;NbD048690.1;NbD005381.1;NbE03054751.1;NbE03061170.1;NbD024878.1;NbD015058.1;NbD005581.1	435
NaN	NaN	NaN	NaN	15.7442	15.3185				-1	3	3	3	5.1	5.1	5.1	104.36	0	35.482	276450	37	9	NbE05067661.1;NbD005382.1;NbE05063155.1;NbD048689.1	NbE05067661.1;NbD005382.1;NbE05063155.1;NbD048689.1	436
17.7068	17.0449	17.6503	16.9532	17.3353	16.954				-1	12	12	12	12.7	12.7	12.7	149.43	0	83.877	3169700	73	37	NbE05066551.1;NbD005386.1	NbE05066551.1;NbD005386.1	437
16.9369	16.9982	17.0531	16.9905	16.9069	17.0014				-1	4	4	4	10.7	10.7	10.7	56.206	0	30.99	1636500	23	19	NbD005389.1;NbD042083.1;NbD024876.1	NbD005389.1;NbD042083.1;NbD024876.1	438
NaN	NaN	NaN	NaN	NaN	NaN				-1	1	1	1	3.8	3.8	3.8	36.013	0.0016812	7.1353	270820	18	3	NbD005397.1	NbD005397.1	439
NaN	NaN	NaN	NaN	NaN	NaN				-1	4	2	2	20	12.7	12.7	24.715	0	17.903	206210	14	6	NbE03053933.1;NbD013108.1;NbD009890.1;NbD007600.1;NbD005398.1;NbD007409.1;NbD045906.1;NbD051694.1;NbD032067.1;NbD000409.1	NbE03053933.1;NbD013108.1;NbD009890.1;NbD007600.1;NbD005398.1;NbD007409.1;NbD045906.1	440
NaN	NaN	NaN	NaN	NaN	NaN				-1	2	2	2	10.1	10.1	10.1	29.655	0	25.261	413910	13	7	NbD005399.1;NbD009891.1;NbE44071173.1;NbE03060874.1	NbD005399.1;NbD009891.1;NbE44071173.1;NbE03060874.1	441
18.6709	18.0619	18.4964	18.4108	18.6869	18.4955				-1	6	6	6	37.8	37.8	37.8	20.037	0	125.43	4956000	12	42	NbD005404.1;NbE03058841.1;NbD009906.1	NbD005404.1;NbE03058841.1;NbD009906.1	442
NaN	NaN	NaN	NaN	NaN	NaN				-1	2	2	2	7.7	7.7	7.7	48.449	0	15.869	294470	16	5	NbD005408.1;NbD024383.1	NbD005408.1;NbD024383.1	443
NaN	NaN	NaN	NaN	NaN	NaN				-1	1	1	1	16	16	16	13.448	0.0011623	8.7102	86480	7	2	NbD049408.1;NbD052965.1;NbD043770.1;NbD026692.1;NbD023786.1;NbD005413.1	NbD049408.1;NbD052965.1;NbD043770.1;NbD026692.1;NbD023786.1;NbD005413.1	444
18.2993	18.1107	18.2737	18.5429	18.8384	18.5904				-1	29	5	5	50.1	11.3	11.3	79.79	0	75.47	4693800	34	28	NbD005444.1	NbD005444.1	445
NaN	17.2954	NaN	NaN	17.17	17.3681				-1	8	7	7	18.9	16.4	16.4	78.103	0	55.223	1336400	36	14	NbD005445.1	NbD005445.1	446
NaN	NaN	NaN	NaN	NaN	NaN				-1	4	1	1	49.2	17.8	17.8	13.036	0.001231	10.758	920050	8	5	NbD005448.1	NbD005448.1	447
NaN	NaN	NaN	NaN	NaN	NaN				-1	19	3	1	40.9	8	4.4	46.83	0	27.552	1421900	24	8	NbD052593.1;NbD005493.1	NbD052593.1;NbD005493.1	448
NaN	NaN	NaN	NaN	NaN	NaN				-1	3	3	3	11.4	11.4	11.4	44.215	0	20.482	320040	22	5	NbD005506.1;NbE03058863.1;NbD018822.1	NbD005506.1;NbE03058863.1;NbD018822.1	449
16.7165	16.4704	16.5935	16.6577	16.5325	16.3307				-1	5	5	5	17.4	17.4	17.4	32.883	0	61.506	1200900	20	20	NbD005513.1	NbD005513.1	450
17.0486	17.0859	17.0193	16.9319	16.8714	16.825				-1	6	6	6	20.9	20.9	20.9	33.302	0	44.28	1895200	16	27	NbD008802.1;NbD005522.1	NbD008802.1;NbD005522.1	451
17.2622	18.2489	16.8004	17.9604	16.9913	18.0478				-1	12	12	5	54.1	54.1	26.6	36.061	0	168.62	4720300	14	53	NbD005550.1	NbD005550.1	452
17.4108	16.2905	17.4903	16.7402	17.6756	16.095				-1	13	13	12	19.1	19.1	16.6	105.82	0	108.78	2029400	53	35	NbD005555.1	NbD005555.1	453
NaN	NaN	NaN	NaN	NaN	NaN				-1	1	1	1	3.8	3.8	3.8	39.464	0.00166	6.9973	385110	19	6	NbD007749.1;NbD005565.1	NbD007749.1;NbD005565.1	454
19.9004	19.1721	NaN	19.1034	20.4629	19.5261				-1	5	3	2	32.8	24.5	13.1	24.843	0	69.573	5824500	11	12	NbD005585.1	NbD005585.1	455
NaN	NaN	NaN	NaN	NaN	NaN				-1	1	1	1	6.5	6.5	6.5	38.803	0.0017373	7.4432	62105	14	2	NbD036478.1;NbD005611.1	NbD036478.1;NbD005611.1	456
17.237	17.0768	17.2375	16.6614	17.0283	16.8938				-1	4	4	4	8.4	8.4	8.4	83.636	0	29.511	1476900	42	15	NbD005613.1;NbE44073930.1	NbD005613.1;NbE44073930.1	457
17.0342	18.1264	NaN	18.2402	NaN	NaN				-1	2	2	2	26.1	26.1	26.1	9.5611	0	13.654	1238100	4	9	NbD015299.1;NbD053133.1;NbD046788.1;NbD040485.1;NbD029797.1;NbD015300.1;NbD006259.1;NbD005621.1;NbD002962.1	NbD015299.1;NbD053133.1;NbD046788.1;NbD040485.1;NbD029797.1;NbD015300.1;NbD006259.1;NbD005621.1;NbD002962.1	458
NaN	NaN	NaN	NaN	NaN	NaN				-1	1	1	1	4.8	4.8	4.8	39.649	0.0012053	9.6589	135190	15	3	NbD005630.1	NbD005630.1	459
NaN	NaN	NaN	NaN	NaN	NaN				-1	2	2	2	13.4	13.4	13.4	25.225	0	16.161	125020	12	3	NbD005637.1	NbD005637.1	460
18.639	18.9065	18.4979	18.3208	18.164	18.2494				-1	8	8	8	57.7	57.7	57.7	22.289	0	323.31	6843500	17	40	NbE05067575.1;NbD005638.1;NbE44069874.1;NbE44069873.1	NbE05067575.1;NbD005638.1;NbE44069874.1;NbE44069873.1	461
18.3176	18.3639	18.81	NaN	19.0305	18.5215				-1	16	2	2	35.8	6.4	6.4	59.431	0	32.054	3323000	29	13	NbD005649.1	NbD005649.1	462
NaN	NaN	NaN	NaN	NaN	NaN				-1	4	4	4	12.4	12.4	12.4	41.177	0	27.522	553130	20	7	NbD005666.1;NbE44074068.1;NbD043852.1	NbD005666.1;NbE44074068.1;NbD043852.1	463
NaN	NaN	NaN	NaN	NaN	NaN				-1	1	1	1	3.9	3.9	3.9	37.226	0.0048915	6.3558	150190	15	3	NbD005673.1;NbD052747.1	NbD005673.1;NbD052747.1	464
NaN	17.0233	NaN	16.584	NaN	16.4177				-1	6	6	6	18	18	18	35.39	0	35.582	802930	14	12	NbD005697.1;NbD032078.1	NbD005697.1;NbD032078.1	465
NaN	18.3552	NaN	18.5423	16.7532	17.6517				-1	7	7	2	24.9	24.9	8.7	44.41	0	47.793	2011900	24	17	NbD005717.1;NbD020614.1	NbD005717.1;NbD020614.1	466
NaN	NaN	NaN	NaN	NaN	NaN				-1	1	1	1	5.1	5.1	5.1	22.626	0.0074783	6.2174	36013	6	1	NbD020615.1;NbD005718.1	NbD020615.1;NbD005718.1	467
16.3842	16.2797	16.5308	16.16	16.451	NaN				-1	3	3	3	17.7	17.7	17.7	32.31	0	24.265	741740	21	13	NbD005751.1;NbE03060139.1;NbD025104.1	NbD005751.1;NbE03060139.1;NbD025104.1	468
NaN	NaN	NaN	NaN	NaN	NaN				-1	3	3	3	17	17	17	21.513	0	18.419	474520	12	7	NbD005756.1;NbD052769.1	NbD005756.1;NbD052769.1	469
NaN	NaN	NaN	NaN	NaN	NaN				-1	3	3	3	15.8	15.8	15.8	41.479	0	18.662	112220	17	4	NbE05066389.1;NbD045602.1;NbD005761.1;NbD022089.1	NbE05066389.1;NbD045602.1;NbD005761.1	470
NaN	NaN	NaN	NaN	NaN	NaN				-1	1	1	1	0.9	0.9	0.9	206.69	0.0043777	6.4982	59714	91	1	NbE03055502.1;NbD005763.1	NbE03055502.1;NbD005763.1	471
NaN	NaN	NaN	NaN	NaN	NaN				-1	1	1	1	3.2	3.2	3.2	57.974	0	16.824	109090	24	3	NbD005774.1;NbE05067407.1;NbE03058802.1;NbD028861.1	NbD005774.1;NbE05067407.1;NbE03058802.1;NbD028861.1	473
NaN	NaN	NaN	NaN	NaN	NaN				-1	1	1	1	1	1	1	152.37	0.0016938	7.1782	129170	70	3	NbD005789.1;NbE03054498.1;NbD041565.1	NbD005789.1;NbE03054498.1;NbD041565.1	474
15.4266	NaN	15.3424	NaN	NaN	15.692				-1	4	4	4	23	23	23	22.98	0	28.414	431270	12	10	NbD005834.1;NbE44072125.1	NbD005834.1;NbE44072125.1	475
19.8791	19.1196	18.6824	18.8459	18.8374	18.6273				-1	5	5	2	32.4	32.4	11.8	15.327	0	64.54	5274000	6	34	NbD005848.1;NbE44070594.1	NbD005848.1;NbE44070594.1	476
NaN	NaN	NaN	NaN	NaN	NaN				-1	11	1	1	35.2	5.8	5.8	40.796	0.0054463	6.303	9766.4	21	1	NbD005853.1;NbE44071789.1	NbD005853.1;NbE44071789.1	477
NaN	16.8123	NaN	17.297	18.2168	NaN				-1	17	2	2	46.5	12.6	12.6	39.726	0	22.967	2183600	20	11	NbD005865.1;NbE03058900.1	NbD005865.1;NbE03058900.1	478
19.1104	18.6412	19.0713	18.2548	19.0398	18.3295				-1	12	12	10	36.7	36.7	31.6	35.54	0	139.12	11732000	19	61	NbD005868.1;NbD049165.1;NbD027399.1;NbE03055729.1	NbD005868.1	479
NaN	NaN	NaN	NaN	NaN	NaN				-1	4	4	3	24	24	21.7	23.259	0	25.059	510360	15	8	NbD005904.1;NbE03059908.1;NbD024508.1;NbE05067735.1	NbD005904.1;NbE03059908.1;NbD024508.1;NbE05067735.1	480
NaN	NaN	NaN	NaN	NaN	NaN				-1	2	2	1	2.9	2.9	1.7	109.35	0	13.759	135910	44	5	NbD005908.1	NbD005908.1	481
NaN	NaN	NaN	NaN	NaN	NaN				-1	1	1	1	1.1	1.1	1.1	134.12	0.0082988	6.1572	341870	69	3	NbE03059086.1;NbD005922.1	NbE03059086.1;NbD005922.1	482
NaN	NaN	NaN	NaN	NaN	NaN				-1	1	1	1	4.7	4.7	4.7	42.975	0.0046598	6.4622	33209	18	1	NbD005926.1;NbE03055160.1;NbD022429.1	NbD005926.1;NbE03055160.1;NbD022429.1	483
21.0437	21.7066	21.1839	21.7356	21.5151	21.7658				-1	11	11	2	46.2	46.2	10.9	17.759	0	249.69	80387000	7	120	NbD046070.1;NbD013798.1;NbD010028.1;NbD005951.1;NbD041065.1;NbD014962.1	NbD046070.1;NbD013798.1;NbD010028.1;NbD005951.1;NbD041065.1	485
NaN	NaN	NaN	NaN	NaN	NaN				-1	2	2	2	4.4	4.4	4.4	79.011	0	13.822	149400	34	3	NbD005952.1	NbD005952.1	486
21.5258	NaN	NaN	22.1392	NaN	22.0134				-1	1	1	1	6	6	6	35.626	0.0037987	6.5908	28883000	21	8	NbD005973.1	NbD005973.1	487
NaN	NaN	NaN	NaN	NaN	NaN				-1	1	1	1	16.9	16.9	16.9	13.381	0.0016324	6.8577	35677	4	1	NbD016258.1;NbD005997.1	NbD016258.1;NbD005997.1	488
NaN	NaN	NaN	NaN	NaN	NaN				-1	1	1	1	1.9	1.9	1.9	99.436	0.0048706	6.3364	45512	44	2	NbD006009.1	NbD006009.1	489
NaN	NaN	NaN	NaN	NaN	NaN				-1	1	1	1	3.1	3.1	3.1	59.293	0.001679	7.1314	43499	30	1	NbD006013.1	NbD006013.1	490
23.1262	22.2112	23.2033	22.0073	23.2571	22.1158				-1	11	11	5	66	66	49.1	22.712	0	235.9	63744000	12	84	NbE05068218.1;NbD006024.1	NbE05068218.1;NbD006024.1	491
16.6087	NaN	NaN	15.9925	17.0026	16.5587				-1	3	3	2	12.4	12.4	6.2	44.614	0	26.08	662300	18	9	NbD006050.1;NbE44074501.1;NbD007904.1	NbD006050.1;NbE44074501.1;NbD007904.1	492
15.5317	16.3219	15.9359	16.8885	16.5836	16.7129				-1	7	7	7	9.4	9.4	9.4	121.29	0	76.988	1793600	55	30	NbD006066.1;NbD039338.1	NbD006066.1	494
NaN	NaN	NaN	NaN	NaN	NaN				-1	3	3	3	8.5	8.5	8.5	68.252	0	23.436	282160	34	5	NbD006080.1;NbE03058526.1;NbD024829.1	NbD006080.1;NbE03058526.1	495
NaN	NaN	NaN	NaN	NaN	NaN				-1	7	3	1	22.6	11.5	4.7	63.256	0	34.251	374300	34	7	NbD006109.1;NbE44074330.1	NbD006109.1;NbE44074330.1	496
NaN	NaN	NaN	NaN	NaN	NaN				-1	4	4	4	9.2	9.2	9.2	69.526	0	27.475	521820	32	8	NbD006122.1;NbE05068117.1;NbD010889.1	NbD006122.1;NbE05068117.1	497
17.9802	NaN	18.0549	18.2298	18.0287	NaN				-1	3	3	3	21.3	21.3	21.3	24.762	0	26.162	1458400	13	11	NbD010890.1;NbD006124.1	NbD010890.1;NbD006124.1	498
16.882	16.3712	15.5348	17.822	NaN	17.3897				-1	3	3	3	17.4	17.4	17.4	17.746	0	28.688	1564600	8	17	NbD010894.1;NbD006133.1	NbD010894.1;NbD006133.1	499
NaN	14.8171	NaN	15.059	NaN	NaN				-1	3	3	3	3.3	3.3	3.3	108.21	0	19.073	143750	54	6	NbD017424.1;NbD006138.1	NbD017424.1;NbD006138.1	500
21.1923	20.857	21.1484	21.2326	21.3042	21.2438				-1	23	7	5	41.5	15.4	12.5	56.384	0	56.623	18469000	25	34	NbD025147.1;NbD006149.1;NbE05064292.1	NbD025147.1;NbD006149.1;NbE05064292.1	501
NaN	NaN	NaN	NaN	NaN	NaN				-1	7	1	1	10	1.6	1.6	98.34	0.0016633	7.0319	362850	38	5	NbD006155.1	NbD006155.1	502
16.8198	16.3464	16.5007	15.927	16.5914	15.7616				-1	8	8	6	12.2	12.2	11	111.58	0	61.144	1564300	53	27	NbE03057974.1;NbD006156.1	NbE03057974.1;NbD006156.1	503
NaN	NaN	NaN	16.298	15.6748	16.2512				-1	6	6	6	6.5	6.5	6.5	138.12	0	61.625	603100	58	14	NbE03057382.1;NbD006165.1;NbD045985.1	NbE03057382.1;NbD006165.1;NbD045985.1	504
NaN	NaN	NaN	NaN	NaN	NaN				-1	2	2	2	8.3	8.3	8.3	43.507	0	17.599	185640	24	7	NbD006178.1;NbD042374.1	NbD006178.1;NbD042374.1	505
NaN	NaN	NaN	NaN	NaN	NaN				-1	2	2	2	7.6	7.6	7.6	49.266	0	16.687	225570	21	6	NbD006179.1;NbE03056482.1	NbD006179.1;NbE03056482.1	506
NaN	15.9619	16.7704	15.8563	15.9379	16.4781				-1	3	3	3	15.3	15.3	15.3	34.093	0	21.174	613390	18	12	NbD028280.1;NbD006194.1	NbD028280.1;NbD006194.1	507
17.1983	17.9172	17.8729	18.6442	17.7557	18.1729				-1	10	10	2	36.2	36.2	6.6	26.214	0	97.291	3924100	12	45	NbD006207.1;NbE03061157.1;NbE44072515.1	NbD006207.1;NbE03061157.1;NbE44072515.1	508
NaN	NaN	NaN	NaN	NaN	NaN				-1	1	1	1	7	7	7	38.74	0.0016949	7.1832	142210	21	3	NbD006208.1	NbD006208.1	509
16.0717	15.3318	16.0872	NaN	NaN	NaN				-1	4	4	4	18.5	18.5	18.5	34.221	0	28.312	555520	20	12	NbD006209.1;NbD014100.1;NbE44073374.1	NbD006209.1;NbD014100.1;NbE44073374.1	510
NaN	NaN	NaN	NaN	NaN	NaN				-1	1	1	1	2.1	2.1	2.1	71.014	0	14.144	56748	20	3	NbE03059030.1;NbD006232.1;NbE03054645.1	NbE03059030.1;NbD006232.1;NbE03054645.1	511
17.2175	16.8521	17.1597	17.1466	16.8906	16.7036				-1	9	9	9	19.2	19.2	19.2	73.593	0	61.47	1653000	34	23	NbD006251.1;NbD023185.1;NbD050091.1;NbE44072046.1	NbD006251.1;NbD023185.1	512
NaN	NaN	NaN	NaN	NaN	NaN				-1	1	1	1	5.2	5.2	5.2	41.243	0.0016072	6.7473	18080	17	1	NbE05067645.1;NbD006270.1	NbE05067645.1;NbD006270.1	513
NaN	NaN	NaN	NaN	NaN	NaN				-1	2	1	1	9	5.2	5.2	39.16	0	23.558	43216	19	1	NbD006289.1	NbD006289.1	514
NaN	18.0025	16.9372	17.4805	16.7379	17.8725				-1	6	6	6	37.1	37.1	37.1	25.154	0	85.276	2079700	17	23	NbD031529.1;NbD006299.1;NbE05068423.1;NbE03057916.1;NbD020517.1	NbD031529.1;NbD006299.1;NbE05068423.1;NbE03057916.1;NbD020517.1	515
NaN	NaN	NaN	NaN	NaN	NaN				-1	1	1	1	14.4	14.4	14.4	9.7572	0.0016393	6.894	569120	6	5	NbD025717.1;NbE03055234.1;NbD016769.1;NbD006348.1;NbD034605.1;NbD018831.1;NbD010521.1	NbD025717.1;NbE03055234.1;NbD016769.1;NbD006348.1;NbD034605.1;NbD018831.1;NbD010521.1	516
16.0849	15.7264	16.3215	16.5523	16.573	16.8284				-1	4	4	4	8.5	8.5	8.5	62.767	0	45.859	1232700	29	22	NbE05064873.1;NbD006351.1	NbE05064873.1;NbD006351.1	517
NaN	NaN	NaN	15.5958	NaN	15.88				-1	3	3	3	11.5	11.5	11.5	32.366	0	17.909	347580	18	8	NbE44070411.1;NbD006360.1;NbE05062849.1;NbD037446.1;NbD036230.1;NbD016774.1	NbE44070411.1;NbD006360.1;NbE05062849.1;NbD037446.1;NbD036230.1;NbD016774.1	518
NaN	16.4269	16.4635	16.255	NaN	NaN				-1	3	3	3	13.3	13.3	13.3	30.486	0	21.197	631790	13	10	NbD007262.1;NbE05065364.1;NbD006371.1;NbD043907.1;NbD020865.1	NbD007262.1;NbE05065364.1;NbD006371.1	519
NaN	NaN	NaN	NaN	NaN	NaN				-1	3	1	1	9.7	2.8	2.8	55.708	0.0016617	7.0143	47005	29	1	NbE03061217.1;NbE05063492.1;NbD006387.1	NbE03061217.1;NbE05063492.1;NbD006387.1	520
19.2066	18.5283	19.3192	18.6597	19.2972	18.5089				-1	6	6	2	18.5	18.5	6.8	47.773	0	142.8	7187300	28	21	NbD050710.1;NbD010379.1;NbD007227.1;NbD006392.1;NbE05066590.1;NbD046059.1	NbD050710.1;NbD010379.1;NbD007227.1;NbD006392.1	521
NaN	NaN	NaN	NaN	NaN	NaN				-1	6	1	1	28.6	8.1	8.1	23.366	0.0010854	7.7267	39405	12	1	NbD006402.1;NbD049173.1;NbD000786.1;NbD011065.1	NbD006402.1;NbD049173.1;NbD000786.1;NbD011065.1	522
NaN	NaN	NaN	NaN	NaN	NaN				-1	2	2	2	20.2	20.2	20.2	11.846	0	11.729	224950	6	5	NbD044918.1;NbD006405.1	NbD044918.1;NbD006405.1	523
NaN	NaN	NaN	NaN	NaN	NaN				-1	1	1	1	7.4	7.4	7.4	16.677	0.0054397	6.2975	451610	8	4	NbD006408.1	NbD006408.1	524
NaN	NaN	NaN	NaN	NaN	NaN				-1	3	3	3	19.3	19.3	19.3	35.607	0	19.507	470870	20	7	NbD045040.1;NbD006434.1	NbD045040.1;NbD006434.1	525
NaN	NaN	NaN	NaN	NaN	NaN				-1	3	3	3	5.2	5.2	5.2	104.87	0	22.645	286550	47	5	NbD006438.1;NbD006439.1	NbD006438.1;NbD006439.1	526
NaN	NaN	NaN	NaN	NaN	NaN				-1	1	1	1	5	5	5	29.926	0.0011119	7.9548	169370	10	4	NbD006447.1	NbD006447.1	527
16.2195	NaN	16.446	NaN	16.4722	NaN				-1	4	4	4	12.6	12.6	12.6	53.325	0	23.687	556360	21	12	NbE05064959.1;NbE03058297.1;NbD006449.1;NbD007105.1	NbE05064959.1;NbE03058297.1;NbD006449.1;NbD007105.1	528
19.0637	18.6113	18.8505	18.6286	19.0907	18.5339				-1	4	4	3	14.1	14.1	10.9	28.865	0	143.17	4909400	5	23	NbE05068044.1;NbE44069487.1;NbE03061453.1;NbD006459.1	NbE05068044.1;NbE44069487.1;NbE03061453.1;NbD006459.1	529
NaN	NaN	NaN	NaN	NaN	NaN				-1	2	2	2	22.8	22.8	22.8	14.577	0	21.757	457750	6	6	NbD006467.1	NbD006467.1	530
NaN	NaN	NaN	NaN	NaN	NaN				-1	8	2	1	9.6	2.7	1.7	122.89	0	13.968	299070	61	6	NbD006474.1	NbD006474.1	531
17.6808	16.7056	17.5004	16.333	17.1416	16.3978				-1	6	6	6	15.3	15.3	15.3	53.96	0	52.833	2244200	23	29	NbD006488.1;NbE44072489.1;NbD038540.1	NbD006488.1	532
NaN	NaN	NaN	NaN	NaN	NaN				-1	1	1	1	2.1	2.1	2.1	83.553	0	22.549	115460	37	3	NbE03056862.1;NbD038787.1;NbE05064689.1;NbD006489.1;NbD030624.1;NbE44072512.1	NbE03056862.1;NbD038787.1;NbE05064689.1;NbD006489.1;NbD030624.1;NbE44072512.1	533
19.9146	19.6417	19.6857	NaN	19.8115	19.8076				-1	16	5	1	30	9.4	2.5	47.443	0	168	7888700	19	21	NbD006492.1;NbD042030.1;NbE44072140.1;NbD041021.1	NbD006492.1	534
17.991	17.9224	17.912	17.9384	17.4911	17.6374				-1	13	13	4	15.8	15.8	6.4	99.178	0	92.011	4182400	46	45	NbD006530.1;NbE03057609.1	NbD006530.1;NbE03057609.1	535
NaN	NaN	NaN	NaN	NaN	NaN				-1	1	1	1	4	4	4	40.888	0.0010977	7.8489	93945	24	2	NbD006540.1	NbD006540.1	536
NaN	NaN	NaN	NaN	15.9715	15.2746				-1	3	3	2	12.1	12.1	9.5	41.809	0	18.479	233920	19	7	NbD044320.1;NbD006552.1;NbD006602.1;NbE05065038.1	NbD044320.1;NbD006552.1;NbD006602.1;NbE05065038.1	537
NaN	NaN	15.861	NaN	15.6535	NaN				-1	3	3	2	24.1	24.1	12.9	19.187	0	21.793	404690	11	9	NbE44072467.1;NbD006582.1	NbE44072467.1;NbD006582.1	538
14.8096	16.6031	NaN	NaN	16.805	17.4313				-1	5	5	5	20.3	20.3	20.3	33.345	0	35.085	815010	14	13	NbD030128.1;NbD006596.1	NbD030128.1;NbD006596.1	539
NaN	16.584	NaN	NaN	16.3739	NaN				-1	2	2	2	14.2	14.2	14.2	29.95	0	18.335	414090	16	7	NbE03056270.1;NbD006608.1;NbE44070177.1	NbE03056270.1;NbD006608.1;NbE44070177.1	540
18.6833	19.5184	18.7255	19.3563	18.7844	19.7006				-1	7	7	7	19.6	19.6	19.6	42.027	0	69.309	5332300	24	24	NbD006612.1;NbE05063613.1;NbE44073849.1;NbE03057760.1;NbD003906.1	NbD006612.1;NbE05063613.1	541
NaN	NaN	NaN	NaN	NaN	NaN				-1	1	1	1	3.2	3.2	3.2	45.503	0.0017458	7.5019	98941	25	2	NbE03058154.1;NbE03055011.1;NbD027328.1;NbD006689.1	NbE03058154.1;NbE03055011.1;NbD027328.1;NbD006689.1	542
17.4248	16.6951	16.8323	16.4675	16.2455	16.3407				-1	7	7	2	15.4	15.4	3	54.673	0	50.439	1506800	29	28	NbD006704.1	NbD006704.1	543
NaN	NaN	15.7916	NaN	15.9219	NaN				-1	2	2	2	2.8	2.8	2.8	106.23	0	12.956	256370	45	6	NbD006706.1	NbD006706.1	544
20.8601	21.3312	20.7864	21.155	20.6836	21.2234				-1	28	28	28	44	44	44	75.147	0	323.31	55388000	31	198	NbD006717.1	NbD006717.1	545
NaN	NaN	NaN	NaN	NaN	NaN				-1	1	1	1	2.9	2.9	2.9	82.077	0.0011669	8.775	52517	40	1	NbD006718.1	NbD006718.1	546
19.7666	19.6408	19.5179	18.9055	19.1312	19.0268				-1	4	4	3	32.2	32.2	21.5	16.833	0	96.554	7189100	9	29	NbD050959.1;NbD008144.1;NbD006753.1;NbD033588.1;NbD022239.1;NbD052653.1;NbD052504.1;NbD039934.1;NbD038786.1	NbD050959.1;NbD008144.1;NbD006753.1;NbD033588.1;NbD022239.1;NbD052653.1;NbD052504.1;NbD039934.1;NbD038786.1	548
18.3031	17.6208	17.8247	16.8167	17.7085	17.4848				-1	5	5	4	19.5	19.5	17.2	43.922	0	44.302	2182700	20	21	NbD038781.1;NbD006757.1	NbD038781.1;NbD006757.1	549
NaN	NaN	16.3037	16.9498	17.38	17.0007				-1	3	3	3	5.9	5.9	5.9	74.952	0	28.857	1233400	32	14	NbE03053793.1;NbD050511.1;NbD006793.1	NbE03053793.1;NbD050511.1;NbD006793.1	550
NaN	NaN	NaN	NaN	NaN	NaN				-1	7	1	1	14.7	3.4	3.4	58.532	0.001161	8.6476	63763	27	2	NbD006807.1;NbD020142.1;NbE05067210.1;NbD053148.1	NbD006807.1	551
NaN	NaN	NaN	NaN	NaN	NaN				-1	6	3	1	23.5	14.7	4.8	45.138	0	13.228	21944	23	1	NbD006835.1	NbD006835.1	552
NaN	NaN	NaN	NaN	NaN	NaN				-1	1	1	1	2.9	2.9	2.9	50.796	0.0016551	6.9565	44314	25	2	NbD037717.1;NbE05063374.1;NbD006847.1;NbE05066564.1	NbD037717.1;NbE05063374.1;NbD006847.1;NbE05066564.1	553
NaN	NaN	NaN	NaN	NaN	NaN				-1	1	1	1	4.1	4.1	4.1	49.194	0.004884	6.3496	18049	21	1	NbE05065453.1;NbE05063375.1;NbD006849.1;NbD048427.1	NbE05065453.1;NbE05063375.1;NbD006849.1;NbD048427.1	554
NaN	NaN	NaN	NaN	NaN	NaN				-1	2	2	2	6.3	6.3	6.3	38.837	0	11.69	109010	17	3	NbD006870.1;NbE44069334.1;NbD041869.1	NbD006870.1;NbE44069334.1;NbD041869.1	555
NaN	NaN	NaN	NaN	NaN	NaN				-1	3	3	1	10.7	10.7	4.2	32.566	0	19.441	491110	18	5	NbD032838.1;NbD006886.1;NbE03058290.1;NbD012424.1	NbD032838.1;NbD006886.1;NbE03058290.1	556
NaN	16.8995	16.0007	NaN	NaN	16.5808				-1	4	4	4	8.5	8.5	8.5	68.528	0	30.335	637410	30	12	NbD030318.1;NbD006903.1;NbD001534.1	NbD030318.1;NbD006903.1;NbD001534.1	557
NaN	NaN	NaN	NaN	NaN	NaN				-1	3	3	3	13.3	13.3	13.3	36.198	0	21.454	309880	19	7	NbD045657.1;NbD006906.1	NbD045657.1;NbD006906.1	558
NaN	NaN	NaN	NaN	NaN	NaN				-1	4	1	1	21.9	9.4	9.4	25.548	0	30.361	924670	12	7	NbD006929.1;NbD006930.1	NbD006929.1;NbD006930.1	559
NaN	NaN	NaN	NaN	NaN	NaN				-1	1	1	1	7.4	7.4	7.4	28.883	0.0011078	7.9216	153400	16	5	NbE44071081.1;NbE44069864.1;NbD006940.1	NbE44071081.1;NbE44069864.1;NbD006940.1	560
NaN	NaN	NaN	NaN	NaN	NaN				-1	4	1	1	17.8	4.7	4.7	39.62	0.0046758	6.4799	103250	13	2	NbD006956.1	NbD006956.1	561
NaN	NaN	NaN	NaN	NaN	NaN				-1	1	1	1	12.8	12.8	12.8	15.659	0.0066026	6.2448	59039	7	2	NbD006966.1;NbD028329.1	NbD006966.1;NbD028329.1	562
NaN	NaN	NaN	NaN	NaN	NaN				-1	12	1	1	21	1.7	1.7	76.585	0.0016351	6.8744	304760	32	4	NbD006996.1	NbD006996.1	563
NaN	NaN	NaN	NaN	NaN	NaN				-1	2	2	1	2	2	0.9	162.36	0.00082747	11.082	65769	66	2	NbD007057.1;NbE44073748.1;NbD034260.1;NbE05062793.1;NbD002112.1	NbD007057.1;NbE44073748.1;NbD034260.1;NbE05062793.1;NbD002112.1	565
NaN	16.2329	16.8604	NaN	16.3368	NaN				-1	3	2	2	10	7.5	7.5	49.085	0	14.124	664780	27	9	NbD007058.1;NbD034259.1	NbD007058.1;NbD034259.1	566
17.1288	16.8368	17.157	16.4729	17.0165	16.4072				-1	5	5	5	6.9	6.9	6.9	154.05	0	72.203	1723200	69	22	NbD007059.1;NbD038069.1	NbD007059.1;NbD038069.1	567
21.1875	17.2544	21.7577	17.1549	21.7911	15.4393				-1	19	19	1	36.2	36.2	2.5	58.811	0	196.96	21269000	24	70	NbD007119.1	NbD007119.1	568
NaN	NaN	NaN	NaN	NaN	NaN				-1	1	1	1	7.2	7.2	7.2	20.075	0.002547	6.654	154750	9	3	NbD007122.1;NbE05064894.1;NbD050351.1	NbD007122.1;NbE05064894.1;NbD050351.1	569
17.8904	NaN	17.9192	NaN	17.6346	NaN				-1	5	5	1	28.6	28.6	11.9	28.194	0	35.089	1404900	14	11	NbD007146.1;NbD031200.1;NbD001801.1	NbD007146.1	570
NaN	NaN	NaN	NaN	NaN	NaN				-1	1	1	1	3.7	3.7	3.7	48.704	0.0017525	7.5335	411390	20	5	NbD025174.1;NbD007156.1	NbD025174.1;NbD007156.1	571
NaN	NaN	NaN	NaN	NaN	NaN				-1	1	1	1	2	2	2	83.526	0.0011755	8.9339	49416	35	2	NbD029690.1;NbD007159.1	NbD029690.1;NbD007159.1	572
NaN	NaN	NaN	NaN	NaN	NaN				-1	1	1	1	2.1	2.1	2.1	69.477	0.0016518	6.9459	19077	29	1	NbD007162.1;NbD029693.1	NbD007162.1;NbD029693.1	573
NaN	NaN	NaN	NaN	NaN	NaN				-1	2	2	2	41.8	41.8	41.8	10.832	0	14.078	102700	6	3	NbD029696.1;NbD007165.1	NbD029696.1;NbD007165.1	574
NaN	NaN	NaN	NaN	NaN	NaN				-1	3	1	1	4.6	1.2	1.2	152.38	0.0011437	8.3024	143300	64	6	NbD007175.1	NbD007175.1	575
18.4908	NaN	18.3327	NaN	18.1606	NaN				-1	3	3	3	18.1	18.1	18.1	30.826	0	31.874	1209800	15	9	NbE05067840.1;NbD022489.1;NbD007198.1	NbE05067840.1;NbD022489.1;NbD007198.1	576
NaN	NaN	NaN	NaN	NaN	NaN				-1	1	1	1	1.3	1.3	1.3	109.7	0.0044094	6.554	79814	48	3	NbD007203.1	NbD007203.1	577
NaN	NaN	NaN	NaN	NaN	NaN				-1	5	5	3	10.7	10.7	5.5	46.793	0	32.239	807050	15	10	NbD007207.1	NbD007207.1	578
18.4489	18.1116	18.2093	17.7189	NaN	17.5986				-1	3	3	3	16.1	16.1	16.1	39.58	0	63.18	2547800	17	16	NbE03057867.1;NbD048036.1;NbD007220.1	NbE03057867.1;NbD048036.1;NbD007220.1	579
17.5924	17.6602	NaN	NaN	17.6386	17.4096				-1	4	4	4	36.6	36.6	36.6	18.097	0	26.655	1399900	10	11	NbD007222.1;NbD023262.1	NbD007222.1;NbD023262.1	580
NaN	NaN	NaN	NaN	NaN	NaN				-1	3	3	1	8.5	8.5	1.9	58.345	0	17.784	427690	30	5	NbD007233.1	NbD007233.1	581
NaN	NaN	NaN	NaN	NaN	NaN				-1	1	1	1	1.9	1.9	1.9	82.847	0.001073	7.6701	234330	30	6	NbD007252.1	NbD007252.1	582
15.7939	NaN	NaN	NaN	15.409	NaN				-1	9	2	2	15.9	4.2	4.2	61.042	0	25.273	309240	20	7	NbD007260.1;NbD006374.1;NbD027206.1	NbD007260.1;NbD006374.1	583
NaN	NaN	NaN	NaN	NaN	NaN				-1	1	1	1	21.6	21.6	21.6	9.7657	0.0011596	8.6237	26666	6	2	NbD007271.1	NbD007271.1	584
16.1303	NaN	16.3903	16.3401	16.9378	16.6722				-1	4	4	4	11.2	11.2	11.2	50.326	0	27.951	870640	23	12	NbD009056.1;NbD007275.1;NbE03055570.1;NbD022654.1;NbD032994.1;NbE03057064.1	NbD009056.1;NbD007275.1;NbE03055570.1;NbD022654.1	585
NaN	NaN	NaN	NaN	NaN	NaN				-1	2	2	2	5.7	5.7	5.7	66.591	0	16.788	208380	14	4	NbE03058046.1;NbD007315.1;NbE44074437.1;NbE05067942.1;NbD036701.1	NbE03058046.1;NbD007315.1;NbE44074437.1;NbE05067942.1;NbD036701.1	586
NaN	NaN	NaN	NaN	NaN	NaN				-1	3	3	3	3.4	3.4	3.4	87.524	0	17.543	167190	41	6	NbD007317.1;NbD029344.1	NbD007317.1	587
NaN	NaN	NaN	NaN	NaN	NaN				-1	3	3	3	15.7	15.7	15.7	39.831	0	20.279	438890	16	7	NbE03057154.1;NbE03057153.1;NbD007318.1	NbE03057154.1;NbE03057153.1;NbD007318.1	588
NaN	16.0659	16.3443	NaN	16.2531	NaN				-1	6	5	4	29.4	25	17.3	39.487	0	37.943	746350	21	12	NbD029346.1;NbD007319.1	NbD029346.1;NbD007319.1	589
NaN	NaN	NaN	NaN	NaN	NaN				-1	2	2	2	8.2	8.2	8.2	18.789	0	13.545	175540	10	4	NbD007329.1;NbD035657.1	NbD007329.1;NbD035657.1	590
NaN	NaN	NaN	NaN	NaN	NaN				-1	1	1	1	4.4	4.4	4.4	52.267	0.0011905	9.2287	197590	26	5	NbD007340.1	NbD007340.1	591
NaN	NaN	NaN	NaN	NaN	NaN				-1	2	2	1	12.1	12.1	4.6	36.114	0	12.871	934340	17	8	NbD007349.1;NbD030130.1;NbD043536.1	NbD007349.1;NbD030130.1;NbD043536.1	592
NaN	NaN	NaN	NaN	NaN	NaN				-1	1	1	1	5.7	5.7	5.7	29.502	0.0046253	6.4009	65856	15	2	NbD007364.1	NbD007364.1	593
18.2338	NaN	17.6852	NaN	18.6191	NaN				-1	6	6	6	19.3	19.3	19.3	42.287	0	42.246	1552100	21	15	NbD007402.1;NbD041417.1	NbD007402.1;NbD041417.1	594
17.8515	17.7562	18.0497	17.565	17.4512	17.9641				-1	6	6	5	23.5	23.5	18.9	36.619	0	39.867	2129300	18	22	NbD007410.1;NbD032065.1	NbD007410.1;NbD032065.1	595
NaN	NaN	NaN	NaN	NaN	NaN				-1	3	1	1	8.8	3.9	3.9	62.928	0.0080166	6.1726	75538	24	2	NbE03060841.1;NbD007415.1	NbE03060841.1;NbD007415.1	596
NaN	NaN	NaN	NaN	NaN	NaN				-1	8	1	1	19.9	3	3	58.313	0	31.034	164220	35	4	NbE44072042.1;NbD007427.1;NbE03056851.1;NbD025271.1	NbE44072042.1;NbD007427.1	597
14.9168	16.6748	NaN	16.1672	15.6284	16.6359				-1	2	2	2	8.2	8.2	8.2	58.939	0	24.658	860870	23	13	NbD007428.1;NbE03056348.1	NbD007428.1;NbE03056348.1	598
NaN	NaN	NaN	NaN	NaN	NaN				-1	2	2	1	11.2	11.2	5.1	39.805	0.00041771	11.306	32779	12	1	NbE44069800.1;NbD007439.1;NbE44073178.1;NbD016394.1	NbE44069800.1;NbD007439.1;NbE44073178.1;NbD016394.1	599
19.8846	19.4133	19.6242	19.4676	19.563	19.2779				-1	15	15	2	52	52	4.3	40.596	0	180.66	20705000	24	111	NbD007457.1	NbD007457.1	600
17.669	NaN	NaN	17.9925	17.8022	17.9339				-1	4	2	2	21.9	15.1	15.1	25.595	0	19.003	1722000	15	14	NbE03060319.1;NbD007461.1	NbE03060319.1;NbD007461.1	602
NaN	NaN	NaN	NaN	NaN	NaN				-1	2	2	2	3.6	3.6	3.6	79.797	0	19.266	312240	36	9	NbD010308.1;NbD007533.1;NbE44070657.1;NbE05066269.1	NbD010308.1;NbD007533.1;NbE44070657.1;NbE05066269.1	603
NaN	NaN	NaN	NaN	NaN	NaN				-1	2	2	1	4.5	4.5	2.4	47.993	0.0011943	9.3798	147330	19	3	NbD007544.1;NbE44073620.1;NbE44071277.1;NbD048574.1;NbE03055604.1;NbD010393.1	NbD007544.1;NbE44073620.1;NbE44071277.1;NbD048574.1;NbE03055604.1;NbD010393.1	604
14.7896	16.4408	16.2877	17.8152	16.6088	17.7996				-1	4	4	4	32.6	32.6	32.6	16.222	0	65.406	1841700	8	19	NbD014268.1;NbD029831.1;NbD007551.1;NbD022584.1;NbE03054593.1;NbD022585.1;NbE44070061.1;NbD011520.1	NbD014268.1;NbD029831.1;NbD007551.1;NbD022584.1;NbE03054593.1;NbD022585.1;NbE44070061.1;NbD011520.1	605
NaN	NaN	NaN	NaN	NaN	NaN				-1	2	1	1	7.9	4.1	4.1	38.285	0.001087	7.7461	687120	17	3	NbD029835.1;NbD014265.1;NbD007554.1	NbD029835.1;NbD014265.1;NbD007554.1	606
16.1614	NaN	16.399	NaN	16.4767	NaN				-1	3	3	3	21.6	21.6	21.6	22.611	0	20.597	479810	13	8	NbD011966.1;NbD007573.1	NbD011966.1;NbD007573.1	607
17.0564	NaN	16.8134	17.0135	NaN	16.9659				-1	2	2	2	13.7	13.7	13.7	20.14	0	45.27	1072100	11	10	NbD007578.1;NbE05064396.1;NbD010243.1	NbD007578.1;NbE05064396.1;NbD010243.1	608
NaN	NaN	NaN	NaN	NaN	NaN				-1	2	2	2	3.3	3.3	3.3	82.692	0	15.282	122750	37	3	NbD007595.1;NbD033526.1	NbD007595.1;NbD033526.1	609
18.0651	18.2817	18.0257	17.7885	17.4958	17.9916				-1	12	12	12	26.3	26.3	26.3	56.475	0	129.03	8337000	26	71	NbD007620.1	NbD007620.1	610
NaN	NaN	NaN	NaN	NaN	NaN				-1	1	1	1	3.4	3.4	3.4	82.296	0.0046268	6.4014	63090	41	1	NbE05066194.1;NbE44071605.1;NbD025891.1;NbD007621.1	NbE05066194.1;NbE44071605.1;NbD025891.1;NbD007621.1	611
NaN	NaN	NaN	NaN	NaN	NaN				-1	1	1	1	7.4	7.4	7.4	23.165	0.0010714	7.6661	360620	13	5	NbE05065633.1;NbE05064334.1;NbE03059328.1;NbD016715.1;NbE03054515.1;NbD007643.1	NbE05065633.1;NbE05064334.1;NbE03059328.1;NbD016715.1;NbE03054515.1;NbD007643.1	612
19.109	19.1528	19.1197	18.9849	19.0358	18.8989				-1	10	7	3	58	49.3	13.3	14.826	0	323.31	7074300	10	29	NbD007667.1;NbE03062345.1;NbD022964.1	NbD007667.1;NbE03062345.1;NbD022964.1	613
17.797	17.9829	17.8519	17.7358	17.8389	17.5908				-1	10	10	4	33.1	33.1	15.1	49.234	0	105.99	4216000	30	45	NbD007678.1;NbE44072435.1;NbD020013.1;NbE03057182.1	NbD007678.1;NbE44072435.1;NbD020013.1;NbE03057182.1	614
NaN	15.9393	14.7356	15.7397	NaN	16.0106				-1	3	3	3	6.4	6.4	6.4	85.698	0	25.548	388690	31	11	NbD051620.1;NbD007701.1	NbD051620.1;NbD007701.1	615
NaN	NaN	NaN	NaN	NaN	NaN				-1	2	2	2	6.6	6.6	6.6	87.176	0	30.073	434450	43	7	NbD007716.1	NbD007716.1	616
15.9087	17.1975	NaN	16.7136	NaN	16.6929				-1	6	6	2	40.3	40.3	16.4	15.358	0	38.344	1113100	7	16	NbE05063828.1;NbD007725.1;NbD023087.1	NbE05063828.1;NbD007725.1;NbD023087.1	617
NaN	NaN	NaN	NaN	NaN	NaN				-1	1	1	1	6.9	6.9	6.9	22.337	0.0011556	8.5257	102760	13	2	NbD007727.1	NbD007727.1	618
17.811	17.5225	17.6633	17.3173	17.5767	16.8695				-1	8	8	2	27.3	27.3	6.4	45.149	0	60.337	1944900	30	26	NbD007729.1;NbE05063826.1;NbD033578.1;NbD049052.1;NbE05068086.1	NbD007729.1;NbE05063826.1;NbD033578.1;NbD049052.1;NbE05068086.1	619
15.7608	16.3175	15.5981	16.0783	15.6209	15.9389				-1	7	7	5	9.4	9.4	6.9	105.83	0	49.805	1074200	45	23	NbD007734.1;NbE05065486.1;NbD024661.1	NbD007734.1;NbE05065486.1;NbD024661.1	620
16.4267	15.9078	16.1324	15.9597	15.9135	15.9348				-1	2	2	2	3	3	3	96.874	0	14.666	797800	39	17	NbD007742.1	NbD007742.1	621
20.1811	19.9115	19.8001	19.4174	19.5334	19.3865				-1	5	5	5	11.3	11.3	11.3	47.512	0	115.61	14297000	20	42	NbE03059012.1;NbD017559.1;NbD007757.1	NbE03059012.1;NbD017559.1;NbD007757.1	622
NaN	NaN	NaN	NaN	NaN	NaN				-1	1	1	1	8.4	8.4	8.4	21.425	0	32.434	69601	11	2	NbD007790.1	NbD007790.1	623
18.4831	18.7135	18.3441	17.9555	18.1731	18.0926				-1	9	9	2	50	50	6.9	26.757	0	72.804	2912400	14	30	NbD007801.1	NbD007801.1	624
NaN	NaN	NaN	NaN	NaN	NaN				-1	2	2	2	10.8	10.8	10.8	36.197	0	14.009	69304	20	4	NbE03058951.1;NbD007802.1	NbE03058951.1;NbD007802.1	625
NaN	NaN	NaN	NaN	NaN	NaN				-1	7	1	1	4.5	0.7	0.7	252.37	0.0011792	9.0147	62168	121	2	NbD007815.1;NbE03059170.1	NbD007815.1;NbE03059170.1	626
NaN	NaN	NaN	NaN	NaN	NaN				-1	1	1	1	3.4	3.4	3.4	50.837	0.0049125	6.3743	551920	21	4	NbE05067263.1;NbD011152.1;NbD007847.1	NbE05067263.1;NbD011152.1;NbD007847.1	627
18.9217	19.2312	19.4801	19.4	19.4939	19.2646				-1	19	7	7	48.7	18.2	18.2	62.329	0	131.35	9594000	32	36	NbD007849.1	NbD007849.1	628
NaN	NaN	NaN	NaN	NaN	NaN				-1	1	1	1	7.1	7.1	7.1	32.087	0.00122	10.338	18676	16	1	NbD027183.1;NbD007854.1	NbD027183.1;NbD007854.1	629
NaN	NaN	NaN	NaN	NaN	NaN				-1	2	2	2	8	8	8	30.659	0	18.842	630590	13	6	NbD007863.1;NbD041071.1;NbE03060149.1	NbD007863.1;NbD041071.1;NbE03060149.1	630
NaN	NaN	NaN	16.9981	16.3703	NaN				-1	4	4	4	21.7	21.7	21.7	13.805	0	24.896	835170	4	9	NbD042990.1;NbD031784.1;NbD028515.1;NbD010643.1;NbD010400.1;NbD007887.1	NbD042990.1;NbD031784.1;NbD028515.1;NbD010643.1;NbD010400.1;NbD007887.1	631
16.1453	15.8821	16.0339	NaN	NaN	NaN				-1	2	2	2	5.4	5.4	5.4	69.033	0	14.526	510700	37	10	NbE03058163.1;NbD007892.1;NbD037022.1;NbD002761.1	NbE03058163.1;NbD007892.1;NbD037022.1;NbD002761.1	632
NaN	NaN	NaN	NaN	NaN	NaN				-1	1	1	1	4.4	4.4	4.4	38.448	0	60.821	223530	21	7	NbD007901.1	NbD007901.1	633
15.2619	15.9883	NaN	16.2731	15.5622	16.1489				-1	6	6	2	10.5	10.5	2.5	65.441	0	46.812	730670	31	16	NbD007905.1	NbD007905.1	634
17.09	17.2616	17.0332	17.0757	16.6718	16.8495				-1	3	3	3	11	11	11	51.916	0	25.229	1344100	21	15	NbD007921.1;NbE03060967.1;NbD026610.1;NbD017329.1	NbD007921.1;NbE03060967.1;NbD026610.1	635
17.7423	18.6752	17.7489	18.5126	17.5715	18.4355				-1	4	4	4	19.2	19.2	19.2	17	0	42.53	3196500	6	15	NbD007928.1;NbD052997.1;NbD014016.1;NbE03060435.1;NbD025477.1	NbD007928.1;NbD052997.1;NbD014016.1;NbE03060435.1;NbD025477.1	636
16.7184	17.3632	16.3293	16.9961	15.887	17.2071				-1	7	7	7	11.8	11.8	11.8	95.644	0	56.963	1987000	47	28	NbD007938.1;NbD019897.1;NbE05065809.1	NbD007938.1;NbD019897.1;NbE05065809.1	637
NaN	NaN	NaN	NaN	NaN	NaN				-1	1	1	1	6.5	6.5	6.5	22.69	0.0094035	6.1058	71631	11	1	NbD007951.1	NbD007951.1	638
NaN	NaN	NaN	NaN	NaN	NaN				-1	2	2	2	5.7	5.7	5.7	66.013	0	16.796	102170	34	2	NbD036133.1;NbD007961.1;NbE44072655.1;NbE05068255.1	NbD036133.1;NbD007961.1;NbE44072655.1;NbE05068255.1	639
NaN	15.6926	16.0913	15.7546	16.1412	15.8619				-1	5	5	5	10.2	10.2	10.2	45.804	0	33.668	870600	19	18	NbD007973.1;NbD015430.2;NbD015430.1;NbE03056267.1;NbD011309.1;NbE44073257.1	NbD007973.1;NbD015430.2;NbD015430.1;NbE03056267.1;NbD011309.1;NbE44073257.1	640
20.1441	19.848	19.9911	19.938	19.817	19.7446				-1	16	16	3	33	33	5.5	46.841	0	323.31	28152000	24	120	NbD007982.1	NbD007982.1	641
16.8551	16.6765	16.8123	16.3917	16.5946	16.5459				-1	7	7	1	40.5	40.5	5.1	25.95	0	61.174	1548700	14	23	NbD008015.1	NbD008015.1	642
NaN	NaN	NaN	NaN	NaN	NaN				-1	2	2	2	3.8	3.8	3.8	48.535	0	15.008	179790	26	4	NbD014130.1;NbD008017.1	NbD014130.1;NbD008017.1	643
NaN	NaN	NaN	NaN	NaN	NaN				-1	14	2	2	23	4.8	4.8	81.632	0	18.713	495410	41	3	NbD008021.1	NbD008021.1	644
NaN	NaN	NaN	NaN	NaN	NaN				-1	1	1	1	1.3	1.3	1.3	139.94	0.0011811	9.0254	206530	72	5	NbE03057108.1;NbD008028.1;NbD018982.1;NbE44071681.1	NbE03057108.1;NbD008028.1;NbD018982.1;NbE44071681.1	645
NaN	NaN	NaN	NaN	NaN	NaN				-1	3	3	2	23	23	10.8	30.734	0	24.163	363440	9	9	NbD031742.1;NbD008041.1	NbD031742.1;NbD008041.1	646
NaN	19.6209	18.9519	19.5048	NaN	19.5529				-1	3	3	3	19.9	19.9	19.9	17.818	0	26.636	4659000	9	12	NbD048818.1;NbD035713.1;NbD031743.1;NbD014632.1;NbD009629.1;NbD008042.1;NbD017729.1	NbD048818.1;NbD035713.1;NbD031743.1;NbD014632.1;NbD009629.1;NbD008042.1	647
15.8064	16.2058	15.9086	16.0855	NaN	16.2258				-1	2	2	2	3.9	3.9	3.9	91	0	44.06	531900	42	11	NbE05068303.1;NbD037512.1;NbD030612.1;NbD008052.1	NbE05068303.1;NbD037512.1;NbD030612.1;NbD008052.1	648
19.2664	NaN	19.2799	16.8133	19.8721	17.4946				-1	9	9	2	22	22	5.4	57.113	0	171.19	6033800	28	33	NbE03054909.1;NbD008081.1	NbE03054909.1;NbD008081.1	649
NaN	NaN	NaN	NaN	NaN	NaN				-1	1	1	1	0.6	0.6	0.6	160.98	0.0046325	6.4145	307460	64	2	NbE44071979.1;NbD011560.1;NbD008088.1;NbE05064586.1	NbE44071979.1;NbD011560.1;NbD008088.1;NbE05064586.1	650
18.1193	17.5644	18.1782	17.6514	17.8854	17.6609				-1	10	10	9	20.5	20.5	18.8	56.072	0	79.414	3205900	23	29	NbD008103.1;NbE05068018.1;NbD017957.1	NbD008103.1;NbE05068018.1	651
NaN	NaN	NaN	NaN	NaN	NaN				-1	1	1	1	2.3	2.3	2.3	62.56	0.0016846	7.1417	307440	25	6	NbE03057435.1;NbD041054.1;NbD008111.1	NbE03057435.1;NbD041054.1;NbD008111.1	652
NaN	NaN	NaN	NaN	NaN	NaN				-1	4	3	3	9	6.8	6.8	57.165	0	15.908	90655	28	3	NbD008122.1;NbD022840.1	NbD008122.1	653
NaN	NaN	NaN	NaN	NaN	NaN				-1	2	2	2	3.2	3.2	3.2	50.021	0	13.951	279340	20	3	NbD008136.1;NbD043515.1;NbE44071879.1	NbD008136.1;NbD043515.1;NbE44071879.1	654
NaN	NaN	NaN	NaN	NaN	NaN				-1	1	1	1	3.4	3.4	3.4	46.713	0.0017013	7.2059	24898	16	1	NbD008145.1;NbE05067859.1;NbE03055908.1;NbE03055144.1;NbD033586.1	NbD008145.1;NbE05067859.1;NbE03055908.1;NbE03055144.1;NbD033586.1	655
16.2131	NaN	15.3742	NaN	NaN	NaN				-1	6	1	1	14.1	2.6	2.6	62.078	0.0011853	9.1041	347200	16	7	NbD008148.1	NbD008148.1	656
17.3332	16.9396	17.3789	16.79	17.0603	16.6527				-1	10	10	10	33.3	33.3	33.3	47.025	0	88.138	2124900	24	34	NbD008153.1;NbD047336.1	NbD008153.1	657
NaN	NaN	15.9004	16.6417	16.8969	NaN				-1	3	1	1	22.2	12.4	12.4	17.206	0.00082988	11.116	460800	9	8	NbD008159.1	NbD008159.1	658
NaN	NaN	NaN	NaN	NaN	NaN				-1	1	1	1	17	17	17	12.143	0.0011825	9.07	402250	3	5	NbD038396.1;NbD008169.1	NbD038396.1;NbD008169.1	659
NaN	NaN	NaN	NaN	NaN	NaN				-1	1	1	1	6.6	6.6	6.6	22.233	0.0010616	7.6136	160860	9	3	NbD024617.1;NbD008194.1	NbD024617.1;NbD008194.1	660
NaN	NaN	NaN	NaN	NaN	NaN				-1	1	1	1	4.7	4.7	4.7	34.318	0.00117	8.8363	285390	18	6	NbD008208.1	NbD008208.1	661
NaN	NaN	NaN	NaN	NaN	NaN				-1	2	2	2	19	19	19	10.804	0	16.914	205710	6	7	NbD024530.1;NbD008210.1;NbD019629.1;NbE05068869.1;NbD009816.1;NbE05068555.1;NbE03061241.1	NbD024530.1;NbD008210.1;NbD019629.1;NbE05068869.1;NbD009816.1;NbE05068555.1;NbE03061241.1	662
16.3191	16.1933	16.4808	NaN	16.4583	16.3569				-1	1	1	1	3.7	3.7	3.7	37.595	0	67.003	734560	13	11	NbE44074523.1;NbE44074522.1;NbD035933.1;NbE05068366.1;NbD008229.1	NbE44074523.1;NbE44074522.1;NbD035933.1;NbE05068366.1;NbD008229.1	663
18.4988	18.2671	18.2002	18.2418	18.197	18.3793				-1	7	7	6	25.9	25.9	21.5	31.649	0	77.196	6427300	18	44	NbD016480.1;NbD008242.1	NbD016480.1;NbD008242.1	664
NaN	NaN	NaN	15.8385	NaN	15.6637				-1	5	4	4	5.9	4.5	4.5	101	0	24.345	270230	58	7	NbD008269.1	NbD008269.1	665
NaN	NaN	NaN	NaN	NaN	NaN				-1	1	1	1	3.6	3.6	3.6	50.541	0.0091284	6.1156	30598	21	1	NbD008292.1	NbD008292.1	666
15.9633	NaN	15.7382	NaN	16.163	NaN				-1	3	3	3	39	39	39	14.977	0	22.366	561650	8	12	NbD008305.1;NbD008304.1;NbD007614.1	NbD008305.1;NbD008304.1;NbD007614.1	667
NaN	NaN	NaN	NaN	NaN	NaN				-1	1	1	1	6.6	6.6	6.6	24.422	0.0010665	7.6432	179270	6	4	NbD008316.1;NbE03055628.1;NbD008318.1	NbD008316.1;NbE03055628.1;NbD008318.1	668
18.3574	17.8689	18.3915	NaN	NaN	17.8166				-1	1	1	1	10.8	10.8	10.8	17.969	0	31.721	1966200	9	10	NbD008339.1	NbD008339.1	669
NaN	NaN	NaN	NaN	NaN	NaN				-1	7	2	2	60.6	20.2	20.2	12.174	0	13.204	149680	7	3	NbD008344.1;NbE44070642.1	NbD008344.1;NbE44070642.1	670
18.5555	18.3873	18.5348	18.29	18.5414	18.2068				-1	12	12	6	27.6	27.6	15.1	65.655	0	211.02	6735000	34	61	NbD008347.1;NbD016117.1;NbE44072536.1	NbD008347.1;NbD016117.1;NbE44072536.1	671
18.0624	17.9036	18.1245	17.6104	17.869	17.516				-1	12	5	5	32	17.4	17.4	42.949	0	140.76	2675000	21	32	NbD008367.1	NbD008367.1	672
17.3858	17.0955	17.1755	17.0662	17.4424	17.0032				-1	7	7	7	14.7	14.7	14.7	52.191	0	53.416	1784900	19	19	NbD008383.1;NbD050079.1	NbD008383.1;NbD050079.1	673
NaN	17.3433	NaN	17.2022	16.8423	17.3933				-1	4	4	4	13	13	13	57.765	0	38.801	1216000	26	14	NbD023061.1;NbD008402.1	NbD023061.1;NbD008402.1	674
NaN	NaN	NaN	NaN	NaN	NaN				-1	7	6	2	8.8	7	1.6	97.837	0	37.437	199500	56	7	NbD008417.1;NbE03059894.1	NbD008417.1;NbE03059894.1	675
NaN	NaN	NaN	NaN	NaN	NaN				-1	1	1	1	7.6	7.6	7.6	21.033	0.0091526	6.1307	50865	8	1	NbD041349.1;NbD008424.1	NbD041349.1;NbD008424.1	676
NaN	NaN	NaN	NaN	NaN	NaN				-1	1	1	1	1.6	1.6	1.6	135.39	0.0031807	6.6448	110410	62	2	NbD011104.1;NbD008447.1	NbD011104.1;NbD008447.1	677
NaN	NaN	NaN	NaN	NaN	NaN				-1	3	1	0	12.6	6.6	0	19.819	0.0016404	6.8971	259770	9	2	NbD008456.1	NbD008456.1	678
NaN	NaN	NaN	NaN	NaN	NaN				-1	1	1	1	3.9	3.9	3.9	41.769	0.0010737	7.6702	169520	17	4	NbD008469.1;NbE03057287.1	NbD008469.1;NbE03057287.1	679
NaN	NaN	NaN	NaN	NaN	NaN				-1	1	1	1	1.9	1.9	1.9	68.027	0.0091365	6.1209	28089	32	1	NbE05066128.1;NbE03056474.1;NbD038448.1;NbE44071548.1;NbD008475.1	NbE05066128.1;NbE03056474.1;NbD038448.1;NbE44071548.1;NbD008475.1	680
NaN	NaN	NaN	NaN	NaN	NaN				-1	2	2	2	2.8	2.8	2.8	77.822	0	12.817	242730	38	4	NbD008483.1;NbD024872.1	NbD008483.1;NbD024872.1	681
NaN	NaN	NaN	NaN	NaN	NaN				-1	1	1	1	3.6	3.6	3.6	60.363	0.0016426	6.9045	30661	31	2	NbE05066584.1;NbD008519.1	NbE05066584.1;NbD008519.1	682
19.5018	19.4674	19.6054	19.1224	19.2652	19.1556				-1	21	2	1	50.6	7.3	5.2	57.151	0	58.447	5764300	28	17	NbD008528.1	NbD008528.1	683
NaN	NaN	NaN	NaN	NaN	NaN				-1	1	1	1	1.4	1.4	1.4	90.465	0.001642	6.9041	58393	42	2	NbE44072255.1;NbD008530.1	NbE44072255.1;NbD008530.1	684
NaN	NaN	NaN	NaN	NaN	NaN				-1	3	3	3	8.7	8.7	8.7	48.449	0	24.416	451480	19	8	NbD008535.1	NbD008535.1	685
NaN	NaN	NaN	NaN	NaN	NaN				-1	2	2	2	2.2	2.2	2.2	202.41	0	13.575	127080	105	5	NbD008537.1;NbE05065225.1	NbD008537.1;NbE05065225.1	686
17.6174	17.4874	17.8036	17.4	17.562	17.2622				-1	4	4	2	21.2	21.2	10.1	35.484	0	35.507	1589100	22	16	NbD008543.1	NbD008543.1	687
17.0659	17.03	17.3719	17.2359	17.7201	17.0198				-1	6	6	6	20.7	20.7	20.7	44.289	0	88.648	2614500	17	30	NbD008581.1;NbD022036.1;NbE03058916.1	NbD008581.1;NbD022036.1;NbE03058916.1	688
NaN	NaN	NaN	NaN	NaN	NaN				-1	3	3	3	6.6	6.6	6.6	70.116	0	19.477	204480	34	6	NbE05064919.1;NbD023032.1;NbD008604.1	NbE05064919.1;NbD023032.1;NbD008604.1	689
NaN	NaN	NaN	NaN	NaN	NaN				-1	1	1	1	13	13	13	13.443	0.0046627	6.4634	197720	5	4	NbD008616.1	NbD008616.1	690
NaN	NaN	NaN	NaN	NaN	NaN				-1	1	1	1	2.1	2.1	2.1	81.204	0.0054315	6.2923	41087	40	1	NbE05066771.1;NbD008625.1	NbE05066771.1;NbD008625.1	691
NaN	16.4475	15.4902	16.0667	NaN	16.2529				-1	6	6	6	9.7	9.7	9.7	107.95	0	42.356	806590	55	17	NbD008627.1;NbD012587.1;NbE05066772.1;NbE03058152.1	NbD008627.1;NbD012587.1;NbE05066772.1;NbE03058152.1	692
NaN	NaN	NaN	NaN	NaN	NaN				-1	1	1	1	5.6	5.6	5.6	31.371	0.0014119	7.5913	37326	13	2	NbD008628.1;NbD012589.1;NbE05063334.1;NbE05068640.1	NbD008628.1;NbD012589.1;NbE05063334.1;NbE05068640.1	693
NaN	NaN	NaN	NaN	NaN	NaN				-1	1	1	1	12.8	12.8	12.8	15.601	0.001149	8.4046	223960	6	4	NbD052974.1;NbD030669.1;NbD008640.1	NbD052974.1;NbD030669.1;NbD008640.1	694
NaN	NaN	NaN	NaN	NaN	NaN				-1	2	2	2	1.6	1.6	1.6	189.62	0	12.976	149060	95	3	NbE44069583.1;NbD008647.1	NbE44069583.1;NbD008647.1	695
NaN	NaN	NaN	NaN	NaN	NaN				-1	1	1	1	8.6	8.6	8.6	23.428	0.0017176	7.2898	11671	11	1	NbD011178.1;NbD008648.1	NbD011178.1;NbD008648.1	696
NaN	NaN	NaN	NaN	NaN	NaN				-1	2	2	2	7.8	7.8	7.8	48.452	0	12.96	106550	20	3	NbD008667.1	NbD008667.1	697
16.3052	16.9816	NaN	16.8001	NaN	17.1183				-1	14	14	2	24.2	24.2	4.2	96.775	0	91.174	1310500	44	26	NbE03060196.1;NbD008696.1	NbE03060196.1;NbD008696.1	698
18.1082	17.6162	18.0504	17.5494	18.2719	17.7427				-1	8	8	0	39.6	39.6	0	29.601	0	80.644	2586500	13	34	NbD008704.1	NbD008704.1	699
17.229	17.1959	16.8781	17.5817	17.0364	17.2294				-1	4	4	2	13.2	13.2	9	42.085	0	41.965	1776400	22	18	NbE05064534.1;NbD008707.1	NbE05064534.1;NbD008707.1	700
NaN	NaN	NaN	NaN	NaN	NaN				-1	3	3	2	4.8	4.8	3.7	69.024	0	18.904	105130	41	3	NbD008712.1;NbD023671.1	NbD008712.1;NbD023671.1	701
NaN	NaN	NaN	NaN	NaN	NaN				-1	2	2	1	19	19	13.3	18.439	0	16.16	348420	9	6	NbD008717.1	NbD008717.1	702
NaN	NaN	NaN	NaN	NaN	NaN				-1	6	1	1	36.3	6.5	6.5	29.134	0	94.592	6486000	17	6	NbD008727.1;NbE44070215.1	NbD008727.1;NbE44070215.1	703
NaN	NaN	NaN	NaN	NaN	NaN				-1	2	1	1	7.5	4.7	4.7	41.02	0.0099648	6.0884	183240	17	3	NbD008731.1	NbD008731.1	704
17.8092	16.8468	17.6932	16.3966	17.5932	16.4851				-1	15	15	6	21.3	21.3	9.2	94.426	0	124.37	4196700	21	48	NbD008756.1	NbD008756.1	705
16.513	16.7838	16.369	16.668	15.8452	16.4355				-1	5	5	4	19.5	19.5	17	44.651	0	37.741	1166800	27	20	NbE44072555.1;NbD008759.1;NbD002677.1;NbD022009.1;NbD043831.1;NbE03057453.1;NbD033241.1	NbE44072555.1;NbD008759.1;NbD002677.1;NbD022009.1	706
NaN	NaN	NaN	NaN	NaN	NaN				-1	2	2	2	5.3	5.3	5.3	71.441	0	14.673	177480	30	4	NbD008760.1;NbD049086.1	NbD008760.1;NbD049086.1	707
NaN	NaN	NaN	NaN	NaN	NaN				-1	1	1	1	8.5	8.5	8.5	19.525	0.0017036	7.2074	210620	10	6	NbD008766.1;NbD049829.1	NbD008766.1;NbD049829.1	708
16.5816	16.57	16.9067	16.9259	16.8113	17.0644				-1	6	6	1	43.4	43.4	6	25.546	0	45.304	1585100	14	27	NbD008775.1	NbD008775.1	709
17.8359	17.3476	17.7863	17.5546	17.872	17.3617				-1	10	10	3	48.2	48.2	26.9	27.375	0	84.71	2859500	15	28	NbD008781.1	NbD008781.1	710
NaN	NaN	NaN	NaN	NaN	NaN				-1	2	1	1	3.2	2.3	2.3	120.06	0.0011583	8.6126	44091	46	1	NbE05067900.1;NbE03056272.1;NbD030315.1;NbD008789.1	NbE05067900.1;NbE03056272.1;NbD030315.1;NbD008789.1	711
NaN	NaN	NaN	NaN	NaN	NaN				-1	1	1	1	3.6	3.6	3.6	36.575	0.0065987	6.2408	77568	17	2	NbD008796.1	NbD008796.1	712
NaN	NaN	NaN	NaN	NaN	NaN				-1	1	1	1	4.9	4.9	4.9	29.705	0.0054562	6.3078	42163	16	1	NbE03061818.1;NbD050400.1;NbD008799.1	NbE03061818.1;NbD050400.1;NbD008799.1	713
20.0483	19.8429	19.8977	19.8548	19.7513	19.7855				-1	19	19	10	59.1	59.1	44.7	37.021	0	323.31	38531000	19	136	NbD008810.1;NbD031106.1;NbD037531.1;NbD022384.1	NbD008810.1;NbD031106.1	714
NaN	NaN	NaN	NaN	NaN	NaN				-1	1	1	1	2.5	2.5	2.5	64.629	0.0011261	8.0578	248610	25	4	NbD008841.1;NbD015115.1	NbD008841.1;NbD015115.1	715
17.2258	NaN	NaN	16.516	15.9459	16.4115				-1	4	4	4	17.4	17.4	17.4	51.304	0	38.685	729120	26	11	NbD008847.1;NbD013051.1	NbD008847.1	716
NaN	NaN	NaN	NaN	NaN	NaN				-1	12	2	2	31.6	4.8	4.8	46.541	0	17.698	327220	23	5	NbD008893.1;NbE05063998.1;NbD003761.1	NbD008893.1;NbE05063998.1	717
17.8315	15.2987	17.996	15.0847	18.0227	14.9975				-1	20	20	5	36.4	36.4	8.3	58.543	0	228.43	5327700	29	71	NbE03056327.1;NbD008897.1	NbE03056327.1;NbD008897.1	718
NaN	NaN	NaN	NaN	NaN	NaN				-1	4	3	3	8.3	7	7	62.87	0	20.692	357780	33	6	NbD008898.1;NbE05066640.1;NbE03054262.1	NbD008898.1;NbE05066640.1;NbE03054262.1	719
NaN	NaN	NaN	NaN	NaN	NaN				-1	1	1	1	2.2	2.2	2.2	67.938	0.0016464	6.9222	86763	32	4	NbE05066641.1;NbD008899.1;NbE44070306.1	NbE05066641.1;NbD008899.1;NbE44070306.1	720
15.9171	NaN	NaN	NaN	15.9313	NaN				-1	8	8	8	12.9	12.9	12.9	114.33	0	53.178	884080	42	12	NbD008903.1;NbD023876.1	NbD008903.1	721
NaN	NaN	NaN	NaN	NaN	NaN				-1	2	2	2	15.3	15.3	15.3	28.193	0	15.771	83084	15	3	NbD008908.1;NbE03061349.1;NbE44073099.1;NbD047234.1;NbE03060463.1;NbD047294.1	NbD008908.1;NbE03061349.1;NbE44073099.1;NbD047234.1;NbE03060463.1;NbD047294.1	722
NaN	NaN	NaN	16.1416	NaN	16.2237				-1	4	4	2	17.1	17.1	10.5	42.581	0	28.596	656910	19	11	NbD008923.1	NbD008923.1	723
NaN	NaN	NaN	NaN	NaN	NaN				-1	6	1	1	19.4	3.1	3.1	49.39	0.0010969	7.8367	196760	23	2	NbD008925.1	NbD008925.1	724
19.0846	18.7015	18.7911	18.7173	19.0366	18.8059				-1	10	10	10	36.6	36.6	36.6	42.455	0	154.95	7270400	21	53	NbD008928.1;NbE03056595.1;NbD020135.1	NbD008928.1;NbE03056595.1;NbD020135.1	725
18.2811	18.2986	18.3019	17.9355	18.0505	17.891				-1	7	7	1	32.1	32.1	9.9	18.88	0	70.49	4859600	4	30	NbD035341.1;NbD008947.1;NbE05066410.1;NbE44069073.1	NbD035341.1;NbD008947.1;NbE05066410.1;NbE44069073.1	726
NaN	NaN	NaN	NaN	NaN	NaN				-1	1	1	1	7.3	7.3	7.3	27.515	0	12.534	342340	14	6	NbD008987.1	NbD008987.1	727
NaN	NaN	NaN	NaN	15.744	16.0406				-1	4	2	2	8.4	3.2	3.2	46.972	0	23.111	275100	15	5	NbD008990.1	NbD008990.1	728
NaN	NaN	15.7945	NaN	15.5933	NaN				-1	3	3	3	5.9	5.9	5.9	53.744	0	19.155	352860	26	8	NbD022395.1;NbD009007.1	NbD022395.1;NbD009007.1	729
NaN	NaN	NaN	NaN	NaN	NaN				-1	1	1	1	9.4	9.4	9.4	35.668	0.0038035	6.604	22320	17	1	NbD009025.1;NbE44072196.1;NbD041651.1	NbD009025.1;NbE44072196.1;NbD041651.1	730
NaN	NaN	NaN	NaN	NaN	NaN				-1	1	1	1	10.3	10.3	10.3	14.112	0.0046296	6.4099	307260	7	3	NbD015649.1;NbD009069.1	NbD015649.1;NbD009069.1	731
NaN	NaN	NaN	NaN	NaN	NaN				-1	7	3	2	36.4	18.4	12	24.244	0	14.345	906030	14	7	NbD051858.1;NbD009075.1	NbD051858.1;NbD009075.1	732
NaN	NaN	NaN	NaN	NaN	NaN				-1	1	1	1	5.7	5.7	5.7	35.381	0.0012165	10.167	27954	18	2	NbD023636.1;NbD009116.1	NbD023636.1;NbD009116.1	733
16.0705	15.7801	16.1153	16.0991	16.2043	NaN				-1	4	4	2	37.4	37.4	21.3	18.72	0	32.19	689120	12	16	NbE44073734.1;NbD009133.1	NbE44073734.1;NbD009133.1	734
NaN	NaN	NaN	NaN	NaN	NaN				-1	2	2	2	5.9	5.9	5.9	54.189	0	23.517	508530	28	8	NbD022271.1;NbD009135.1	NbD022271.1;NbD009135.1	735
NaN	NaN	NaN	NaN	NaN	NaN				-1	1	1	1	6.3	6.3	6.3	25.156	0.0011074	7.9188	205970	5	4	NbE03053514.1;NbD051790.1;NbD009136.1	NbE03053514.1;NbD051790.1;NbD009136.1	736
NaN	NaN	NaN	NaN	NaN	NaN				-1	3	3	3	18.1	18.1	18.1	28.973	0	21.655	301760	14	5	NbD051789.1;NbD009137.1	NbD051789.1;NbD009137.1	737
16.941	16.9722	17.0252	16.7703	16.832	16.7047				-1	6	6	3	14.9	14.9	9.3	58.523	0	41.727	1337600	25	18	NbD049026.1;NbD009146.1;NbE44073835.1;NbE44073114.1;NbE03056597.1;NbD038369.1;NbD029197.1;NbD028570.1	NbD049026.1;NbD009146.1	738
15.2389	NaN	15.4339	NaN	15.6362	15.2118				-1	3	3	3	9.6	9.6	9.6	67.039	0	46.614	286480	25	11	NbE05063849.1;NbD009155.1;NbD015203.1;NbE03060634.1	NbE05063849.1;NbD009155.1;NbD015203.1	739
NaN	NaN	NaN	NaN	NaN	NaN				-1	4	4	4	17.8	17.8	17.8	41.996	0	25.797	1111000	20	9	NbD009206.1;NbD049604.1;NbE03062348.1	NbD009206.1;NbD049604.1	740
NaN	NaN	NaN	18.4968	NaN	18.5726				-1	14	2	1	10	1.5	0.7	189.04	0	19.069	1694300	84	11	NbD009208.1;NbE05065060.1	NbD009208.1;NbE05065060.1	741
17.4696	17.8701	17.6198	17.6514	17.1509	17.7935				-1	9	9	2	23.2	23.2	5.6	57.133	0	117.34	2886700	31	32	NbE03056649.1;NbD009214.1;NbD035913.1	NbE03056649.1;NbD009214.1	742
NaN	16.3007	NaN	15.9559	NaN	17.1984				-1	4	4	4	10.7	10.7	10.7	68.4	0	43.595	622340	30	11	NbD047299.1;NbD009246.1;NbE05068277.1;NbD028703.1;NbD052869.1	NbD047299.1;NbD009246.1	743
NaN	NaN	NaN	NaN	NaN	NaN				-1	1	1	1	15.2	15.2	15.2	11.372	0	17.378	441050	6	6	NbD047301.1;NbD012055.1;NbD009248.1	NbD047301.1;NbD012055.1;NbD009248.1	744
17.7953	17.5892	17.9363	17.1547	17.5084	17.2204				-1	5	5	5	38.9	38.9	38.9	23.201	0	63.142	3055600	11	27	NbD048597.1;NbE03058793.1;NbD030175.1;NbD026420.1;NbD009281.1;NbD028623.1;NbD044496.1	NbD048597.1;NbE03058793.1;NbD030175.1;NbD026420.1;NbD009281.1;NbD028623.1	745
NaN	NaN	NaN	NaN	NaN	NaN				-1	8	3	3	22.4	9.1	9.1	54.614	0	21.634	436710	25	7	NbD009282.1;NbE44072358.1	NbD009282.1;NbE44072358.1	746
16.1302	16.3733	15.6267	16.8485	16.2738	16.7453				-1	5	5	0	7.3	7.3	0	90.628	0	39.841	838120	44	17	NbD009286.1	NbD009286.1	747
NaN	NaN	NaN	15.7747	15.6119	15.8975				-1	3	3	3	7.8	7.8	7.8	68.234	0	22.621	475260	32	10	NbD009309.1;NbE03059933.1	NbD009309.1;NbE03059933.1	748
16.3432	17.7711	16.6347	18.0856	16.883	18.2082				-1	11	11	6	38.7	38.7	21.5	34.666	0	135.93	3920100	11	47	NbD009316.1	NbD009316.1	749
NaN	NaN	NaN	NaN	NaN	NaN				-1	1	1	1	4	4	4	35.444	0.0010913	7.7906	134570	14	4	NbE05066509.1;NbD009321.1;NbD016600.1;NbE44072584.1	NbE05066509.1;NbD009321.1;NbD016600.1;NbE44072584.1	750
17.6841	17.4366	17.5771	16.8031	17.2963	17.0474				-1	4	4	4	18.3	18.3	18.3	34.199	0	73.488	1602900	21	22	NbE44072831.1;NbD021294.1;NbD009331.1;NbE03054315.1;NbE05063794.1;NbD017791.1	NbE44072831.1;NbD021294.1;NbD009331.1;NbE03054315.1;NbE05063794.1;NbD017791.1	751
NaN	15.8828	NaN	15.1199	NaN	NaN				-1	3	3	3	5.1	5.1	5.1	124.54	0	18.521	249040	58	7	NbE03055945.1;NbD009332.1;NbE05065731.1;NbD021295.1	NbE03055945.1;NbD009332.1;NbE05065731.1;NbD021295.1	752
NaN	15.8196	NaN	15.4461	15.8	15.6968				-1	3	3	3	6.7	6.7	6.7	55.952	0	25.056	449500	27	11	NbD023516.1;NbD009352.1	NbD023516.1;NbD009352.1	753
NaN	NaN	NaN	NaN	NaN	NaN				-1	1	1	1	6	6	6	33.427	0.0011385	8.2514	85019	16	2	NbD009368.1	NbD009368.1	754
17.5256	16.7774	17.2277	17.1917	17.3191	17.205				-1	12	12	8	47.2	47.2	31.7	41.289	0	110.94	3484400	28	53	NbE44071637.1;NbD009383.1	NbE44071637.1;NbD009383.1	755
18.2943	19.8204	18.2785	19.4681	18.1244	19.5321				-1	11	11	5	33.7	33.7	12.2	30.627	0	195.94	11723000	16	55	NbD009385.1	NbD009385.1	756
NaN	NaN	NaN	NaN	NaN	NaN				-1	3	3	3	9	9	9	43.706	0	18.371	204480	22	5	NbE03059276.1;NbD015637.1;NbD009399.1	NbE03059276.1;NbD015637.1;NbD009399.1	757
NaN	NaN	NaN	17.6578	17.7914	NaN				-1	11	2	2	22	4.9	4.9	76.399	0	24.634	748360	32	6	NbE03053857.1;NbD029533.1;NbD009403.1	NbE03053857.1;NbD029533.1;NbD009403.1	758
NaN	NaN	NaN	NaN	NaN	NaN				-1	1	1	1	8.3	8.3	8.3	24.19	0.0011433	8.2971	133150	11	3	NbE03058534.1;NbD016597.1;NbE03060041.1;NbD009428.1	NbE03058534.1;NbD016597.1;NbE03060041.1;NbD009428.1	759
15.8475	NaN	15.5795	NaN	NaN	NaN				-1	3	3	3	30.3	30.3	30.3	21.097	0	21.258	412210	13	12	NbD009432.1;NbD025980.1	NbD009432.1;NbD025980.1	760
NaN	NaN	NaN	NaN	NaN	NaN				-1	1	1	1	15.3	15.3	15.3	12.144	0.0017206	7.3175	20471	7	2	NbD025977.1;NbD009437.1;NbE44073183.1;NbE05063276.1	NbD025977.1;NbD009437.1;NbE44073183.1;NbE05063276.1	761
18.1254	18.0141	18.2442	17.9594	18.3284	17.821				-1	8	8	8	26	26	26	47.333	0	81.354	5174500	26	47	NbE03059359.1;NbD009445.1	NbE03059359.1;NbD009445.1	762
NaN	NaN	NaN	17.5609	17.8942	NaN				-1	3	3	3	5.9	5.9	5.9	75.951	0	22.808	1143000	27	8	NbD009450.1;NbD033609.1	NbD009450.1;NbD033609.1	763
18.2472	18.5125	17.6632	18.238	NaN	18.4993				-1	21	4	4	48.7	11.5	11.5	53.143	0	32.04	2166300	23	16	NbD012482.1;NbD009481.1	NbD012482.1;NbD009481.1	764
NaN	NaN	NaN	NaN	NaN	NaN				-1	10	1	1	29.9	2.8	2.8	55.764	0	11.623	465400	22	3	NbD009482.1	NbD009482.1	765
18.1053	17.974	18.089	17.6984	17.9874	17.7055				-1	4	4	2	43.1	43.1	22.2	15.25	0	180.3	2679000	7	15	NbD009483.1;NbD038373.1;NbD009078.1;NbE44071678.1	NbD009483.1;NbD038373.1;NbD009078.1	766
16.2622	NaN	NaN	18.7721	NaN	18.6961				-1	5	2	2	25.7	10.5	10.5	19.833	0	22.928	1510800	8	9	NbD034459.1;NbD038231.1;NbD009490.1;NbE03055861.1;NbD024568.1	NbD034459.1;NbD038231.1;NbD009490.1;NbE03055861.1;NbD024568.1	767
16.3624	NaN	NaN	NaN	16.3636	NaN				-1	2	2	2	9.1	9.1	9.1	32.098	0	13.615	574520	16	8	NbD045034.1;NbD009510.1	NbD045034.1;NbD009510.1	769
16.5284	16.9364	NaN	NaN	15.7641	16.8028				-1	6	5	2	22.2	17.5	6.2	45.168	0	34.481	921860	20	14	NbD009521.2;NbE03055539.1;NbD009521.1;NbE44074035.1;NbD009701.1;NbD048576.1	NbD009521.2;NbE03055539.1;NbD009521.1;NbE44074035.1;NbD009701.1	770
NaN	NaN	NaN	NaN	NaN	NaN				-1	1	1	1	18.5	18.5	18.5	7.0517	0.0048677	6.3342	68664	2	2	NbD042257.1;NbD009531.1	NbD042257.1;NbD009531.1	771
NaN	15.9818	NaN	16.0349	NaN	15.7699				-1	2	2	2	11.6	11.6	11.6	35.516	0	17.528	492550	14	9	NbD051522.1;NbD009556.1;NbE05067371.1	NbD051522.1;NbD009556.1;NbE05067371.1	772
16.9111	NaN	16.8501	17.1384	16.8869	17.0468				-1	7	7	7	22.5	22.5	22.5	35.561	0	54.476	1347700	19	17	NbD039690.1;NbE05064499.1;NbD009566.1;NbD001367.1;NbD018030.1	NbD039690.1;NbE05064499.1;NbD009566.1;NbD001367.1	773
16.879	16.9144	16.2796	17.004	17.0425	16.9914				-1	9	9	9	20	20	20	46.785	0	59.349	1894000	23	26	NbD009586.1;NbD010149.1	NbD009586.1;NbD010149.1	774
16.5503	18.4294	17.2346	18.6373	17.5513	18.7035				-1	9	9	3	30.7	30.7	8	29.715	0	100.33	5895400	16	45	NbD010151.1;NbD009589.1;NbD009588.1	NbD010151.1;NbD009589.1;NbD009588.1	775
15.7081	16.0442	NaN	NaN	15.8032	15.4134				-1	4	4	4	17.3	17.3	17.3	42.863	0	42.868	445860	25	12	NbD009596.1	NbD009596.1	776
NaN	NaN	NaN	NaN	NaN	NaN				-1	1	1	1	3.7	3.7	3.7	39.116	0.0017059	7.2407	57239	19	1	NbD009614.1	NbD009614.1	777
15.6503	16.8739	16.2209	16.8823	16.1884	NaN				-1	2	2	2	6.2	6.2	6.2	58.942	0	19.542	742500	25	11	NbD009639.1;NbE03057574.1;NbD007705.1	NbD009639.1;NbE03057574.1;NbD007705.1	778
17.3685	16.6347	NaN	16.8933	16.8805	17.1397				-1	6	6	5	12.7	12.7	12.7	85.231	0	52.656	1363100	27	18	NbD009641.1;NbD009478.1	NbD009641.1;NbD009478.1	779
NaN	NaN	NaN	NaN	NaN	NaN				-1	1	1	1	3.4	3.4	3.4	48.12	0.0011788	9.0123	221030	19	6	NbD009644.1	NbD009644.1	780
NaN	NaN	NaN	NaN	NaN	NaN				-1	2	2	2	8.3	8.3	8.3	28.382	0	11.878	129560	15	3	NbD009657.1	NbD009657.1	781
NaN	NaN	NaN	NaN	NaN	NaN				-1	1	1	1	2	2	2	70.618	0.0011862	9.112	158740	24	3	NbE03061999.1;NbD044705.1;NbD009662.1	NbE03061999.1;NbD044705.1;NbD009662.1	782
16.4039	16.0113	16.2714	16.1332	16.4492	16.4059				-1	7	7	6	12.2	12.2	10	92.563	0	61.832	1019900	37	17	NbD050151.1;NbD009677.1	NbD050151.1;NbD009677.1	783
NaN	NaN	16.6147	NaN	16.9056	NaN				-1	3	3	3	6.7	6.7	6.7	71.71	0	21.587	683240	35	9	NbE05064012.1;NbD045405.1;NbD009691.1;NbE44072476.1	NbE05064012.1;NbD045405.1;NbD009691.1;NbE44072476.1	784
NaN	NaN	NaN	NaN	NaN	NaN				-1	1	1	1	1.9	1.9	1.9	80.43	0.0016361	6.8853	123490	25	3	NbE05067607.1;NbE03056923.1;NbE44073086.1;NbE44073049.1;NbD020156.1;NbD009715.1	NbE05067607.1;NbE03056923.1;NbE44073086.1;NbE44073049.1;NbD020156.1;NbD009715.1	785
NaN	NaN	NaN	NaN	NaN	NaN				-1	1	1	1	7	7	7	38.643	0	15.61	179140	17	3	NbD009716.1;NbE05067608.1	NbD009716.1;NbE05067608.1	786
NaN	NaN	NaN	NaN	NaN	NaN				-1	2	2	2	7.7	7.7	7.7	35.519	0	11.51	70750	18	2	NbD009723.1;NbE05066054.1;NbD026455.1	NbD009723.1;NbE05066054.1;NbD026455.1	787
NaN	NaN	NaN	NaN	NaN	NaN				-1	1	1	1	6.9	6.9	6.9	19.341	0	18.539	37793	11	1	NbD017140.1;NbD009734.1	NbD017140.1;NbD009734.1	788
NaN	NaN	NaN	NaN	NaN	NaN				-1	6	1	1	6.9	1.4	1.4	180.19	0.0011579	8.5823	114360	83	3	NbE03056185.1;NbD046191.1;NbD009737.1;NbE44074319.1;NbD035107.1;NbD025868.1;NbE05067679.1;NbE44072994.1	NbE03056185.1;NbD046191.1;NbD009737.1;NbE44074319.1;NbD035107.1;NbD025868.1;NbE05067679.1;NbE44072994.1	789
NaN	NaN	NaN	NaN	NaN	NaN				-1	1	1	1	6.9	6.9	6.9	14.144	0.0080238	6.174	48793	8	1	NbD009738.1;NbE05062914.1;NbD046192.1	NbD009738.1;NbE05062914.1;NbD046192.1	790
NaN	NaN	NaN	NaN	NaN	NaN				-1	3	3	3	5.6	5.6	5.6	111.08	0	27.299	178420	40	5	NbD009788.1;NbE05063086.1;NbD031600.1	NbD009788.1;NbE05063086.1;NbD031600.1	791
NaN	NaN	NaN	NaN	NaN	NaN				-1	2	2	2	24.6	24.6	24.6	7.3434	0	13.226	121010	3	3	NbD009795.1;NbE05066859.1	NbD009795.1;NbE05066859.1	792
15.7302	NaN	15.6767	15.6062	15.7046	15.3418				-1	4	4	4	7	7	7	83.043	0	31.578	551480	42	13	NbD009812.1	NbD009812.1	793
NaN	NaN	16.5981	15.9434	16.5938	NaN				-1	3	3	3	9.4	9.4	9.4	72.232	0	21.317	759900	31	13	NbD009838.1	NbD009838.1	794
NaN	NaN	NaN	NaN	NaN	NaN				-1	2	2	2	6.9	6.9	6.9	47.632	0	13.431	254900	26	7	NbD042775.1;NbD009844.1	NbD042775.1;NbD009844.1	795
NaN	NaN	NaN	NaN	NaN	NaN				-1	1	1	1	4.4	4.4	4.4	37.752	0.0010733	7.6701	209140	16	4	NbD042773.1;NbE03057602.1;NbD009846.1	NbD042773.1;NbE03057602.1;NbD009846.1	796
NaN	NaN	NaN	NaN	NaN	NaN				-1	2	2	1	6.9	6.9	4.8	51.114	0	22.472	401710	20	8	NbE05067880.1;NbD012099.1;NbD009868.1	NbE05067880.1;NbD012099.1;NbD009868.1	797
16.16	NaN	15.8322	NaN	NaN	NaN				-1	3	3	3	3.9	3.9	3.9	104.53	0	19.509	257440	47	5	NbD009888.1	NbD009888.1	798
18.3236	17.9112	18.5025	17.8213	18.421	17.7331				-1	12	12	12	32.7	32.7	32.7	49.439	0	193.77	6662200	25	63	NbD041831.1;NbD009898.1;NbE44071175.1;NbD013130.1	NbD041831.1;NbD009898.1;NbE44071175.1;NbD013130.1	799
16.9301	17.4558	17.4695	17.0636	17.322	17.2009				-1	4	4	4	39	39	39	15.053	0	90.499	1781600	7	20	NbD009904.1;NbD005403.1	NbD009904.1;NbD005403.1	800
NaN	NaN	NaN	17.0195	17.481	16.9171				-1	6	6	2	16.8	16.8	7.3	60.745	0	41.011	1255400	32	15	NbD009916.1;NbE44071200.1	NbD009916.1;NbE44071200.1	801
NaN	NaN	NaN	NaN	NaN	NaN				-1	1	1	1	4.9	4.9	4.9	27.567	0.0019225	6.7215	195140	14	5	NbD009930.1;NbE44074420.1;NbD042177.1	NbD009930.1;NbE44074420.1;NbD042177.1	802
15.6714	16.2075	15.5645	15.8667	15.4312	15.8384				-1	4	4	2	8.1	8.1	4.1	71.392	0	43.597	776220	30	19	NbD009936.1	NbD009936.1	803
16.4295	15.9205	16.344	16.1065	16.4105	16.2533				-1	4	4	4	8.9	8.9	8.9	72.481	0	34.722	1213600	32	23	NbE03058868.1;NbD009975.1;NbE03057454.1;NbD050700.1	NbE03058868.1;NbD009975.1;NbE03057454.1;NbD050700.1	804
17.5537	17.1962	17.4001	17.0305	17.0928	17.0768				-1	10	10	3	31.4	31.4	10.1	34.179	0	70.444	2161900	13	28	NbD014669.1;NbE05063451.1;NbD009980.1	NbD014669.1;NbE05063451.1;NbD009980.1	805
19.6703	NaN	19.7866	16.9877	19.8271	17.1243				-1	18	18	17	34.2	34.2	29.6	52.953	0	267.67	9788100	25	53	NbD010010.1	NbD010010.1	806
NaN	17.1944	NaN	16.6621	NaN	16.7081				-1	3	3	3	19.7	19.7	19.7	30.415	0	26.541	611640	13	10	NbD051328.1;NbD010019.1;NbE44073779.1;NbD045773.1	NbD051328.1;NbD010019.1;NbE44073779.1;NbD045773.1	807
17.5595	16.9544	17.5265	16.5569	16.8573	16.2733				-1	9	5	4	32.8	21.9	18.1	43.039	0	83.977	2360000	20	33	NbD014155.1;NbD010023.1;NbD014433.1;NbD003883.1;NbE44071815.1	NbD014155.1;NbD010023.1;NbD014433.1;NbD003883.1;NbE44071815.1	808
NaN	NaN	NaN	NaN	NaN	NaN				-1	3	2	1	6.9	5.4	2.4	53.491	0.0011962	9.4505	104170	28	1	NbE05066954.1;NbD010031.1	NbE05066954.1;NbD010031.1	809
16.6281	16.7673	16.3493	NaN	16.3224	16.4981				-1	6	6	1	6.7	6.7	1.5	188.68	0	60.313	999860	84	16	NbD045620.1;NbE44073489.1;NbE44072149.1;NbD010035.1;NbE03055075.1	NbD045620.1;NbE44073489.1;NbE44072149.1;NbD010035.1;NbE03055075.1	810
NaN	NaN	17.1684	16.846	16.8488	16.7874				-1	3	3	2	19.3	19.3	13.2	25.526	0	79.4	991420	11	11	NbD052258.1;NbD010065.1	NbD052258.1;NbD010065.1	811
NaN	NaN	NaN	NaN	NaN	NaN				-1	2	2	2	5.9	5.9	5.9	55.52	0	14.137	268510	32	5	NbD010069.1;NbE05064442.1;NbD045721.1;NbE44072666.1;NbD051034.1;NbD021370.1	NbD010069.1;NbE05064442.1;NbD045721.1;NbE44072666.1;NbD051034.1;NbD021370.1	812
NaN	NaN	NaN	NaN	NaN	NaN				-1	2	1	1	17.9	13	13	22.657	0.0046569	6.4584	27271	12	1	NbD010076.1	NbD010076.1	813
16.3955	16.3165	NaN	NaN	NaN	NaN				-1	7	5	4	28.9	23.8	17.1	55.844	0	35.858	524150	26	10	NbD010108.1	NbD010108.1	814
16.0403	16.1712	15.6091	NaN	15.6461	15.7885				-1	2	2	2	16.6	16.6	16.6	17.469	0	14.137	506240	7	11	NbE05068286.1;NbD028484.1;NbD010146.1;NbD051875.1	NbE05068286.1;NbD028484.1;NbD010146.1;NbD051875.1	815
16.3547	15.873	NaN	15.3258	15.5189	NaN				-1	1	1	1	8.2	8.2	8.2	16.815	0.001755	7.5491	445690	8	10	NbD010187.1;NbD030461.1	NbD010187.1;NbD030461.1	816
17.8078	17.6994	17.7091	17.7203	17.4875	NaN				-1	4	4	4	26.9	26.9	26.9	24.805	0	29.952	2218400	11	20	NbE05062854.1;NbD010207.1;NbE44070534.1;NbD022358.1;NbE05064075.1;NbE44074481.1	NbE05062854.1;NbD010207.1;NbE44070534.1	817
NaN	NaN	NaN	NaN	NaN	NaN				-1	1	1	1	4.7	4.7	4.7	44.756	0.0054595	6.3144	13288	22	1	NbD016881.1;NbE03053508.1;NbE05062853.1;NbD010208.1	NbD016881.1;NbE03053508.1;NbE05062853.1;NbD010208.1	818
NaN	NaN	NaN	NaN	NaN	NaN				-1	6	1	1	34.6	8.4	8.4	26.04	0	16.015	742750	14	6	NbD052632.1;NbD010218.1;NbD006506.1;NbD046841.1;NbD016875.1;NbE44074166.1	NbD052632.1;NbD010218.1;NbD006506.1;NbD046841.1;NbD016875.1	819
NaN	NaN	NaN	NaN	NaN	NaN				-1	4	1	1	9.7	3.3	3.3	67.727	0.0012225	10.433	119530	24	4	NbD031663.1;NbE03054893.1;NbD010232.1;NbE05065242.1;NbD019247.1;NbD047040.1;NbD034116.1;NbD033873.1;NbE03055167.1;NbD027944.1;NbE05068182.1;NbE05063427.1;NbD017812.1	NbD031663.1;NbE03054893.1;NbD010232.1	820
NaN	NaN	NaN	NaN	NaN	NaN				-1	2	2	2	7.5	7.5	7.5	44.254	0	14.997	136260	13	4	NbD010263.1;NbD049453.1	NbD010263.1;NbD049453.1	821
17.0712	16.917	16.8936	16.6824	16.586	16.7192				-1	11	11	10	30.1	30.1	26.7	57.819	0	98.805	3021100	30	51	NbD046476.1;NbD010269.1;NbE03056132.1;NbE44070883.1;NbE05064194.1	NbD046476.1;NbD010269.1;NbE03056132.1	822
NaN	NaN	NaN	NaN	15.1817	15.6944				-1	1	1	1	17.1	17.1	17.1	7.936	0.0041035	6.5657	221900	3	6	NbE03054665.1;NbD040478.1;NbD022059.1;NbD010286.1	NbE03054665.1;NbD040478.1;NbD022059.1;NbD010286.1	823
NaN	NaN	NaN	NaN	NaN	NaN				-1	1	1	1	3.8	3.8	3.8	50.15	0.0010653	7.6411	966930	25	3	NbD010291.1;NbD010290.1	NbD010291.1;NbD010290.1	824
16.9267	16.1477	16.8405	15.7941	16.2023	16.1371				-1	8	8	4	24	24	11.3	63.64	0	102.28	1380200	33	24	NbE05065712.1;NbD010294.1	NbE05065712.1;NbD010294.1	825
NaN	17.4227	17.4891	NaN	NaN	17.6832				-1	4	4	2	13.7	13.7	6.5	55.135	0	29.987	1296900	26	11	NbD010296.1	NbD010296.1	826
16.3046	16.8165	16.492	16.646	16.6464	NaN				-1	5	2	2	43.2	22.5	22.5	12.482	0	13.712	594360	5	11	NbD032965.1;NbD010327.1	NbD032965.1;NbD010327.1	827
16.3995	16.7932	NaN	16.7212	16.1673	16.4757				-1	2	2	2	5.6	5.6	5.6	51.603	0	15.523	939980	26	13	NbE03055876.1;NbD033090.1;NbD010358.1;NbE44074640.1	NbE03055876.1;NbD033090.1;NbD010358.1;NbE44074640.1	828
NaN	NaN	NaN	NaN	NaN	NaN				-1	1	1	1	3	3	3	70.695	0.0011494	8.4078	105440	28	4	NbD046285.1;NbD010370.1	NbD046285.1;NbD010370.1	829
NaN	16.8443	NaN	17.584	NaN	18.2644				-1	5	5	4	11	11	9.1	76.528	0	34.424	1280900	29	15	NbD010380.1;NbE03056446.1;NbD050711.1;NbE03056589.1;NbD034684.1	NbD010380.1;NbE03056446.1;NbD050711.1	830
17.217	16.5278	17.02	16.2587	17.0656	16.3197				-1	5	5	4	7.7	7.7	7.7	82.386	0	39.371	1400800	35	22	NbD010394.1;NbD007150.1	NbD010394.1;NbD007150.1	831
17.7921	17.0636	17.8532	17.6817	17.9231	17.6655				-1	8	8	7	43.9	43.9	40.5	29.114	0	115.77	3847500	17	35	NbD010412.1;NbD013423.1	NbD010412.1	832
17.5677	17.381	17.3963	17.2721	17.2284	16.9979				-1	8	8	8	44.9	44.9	44.9	22.573	0	64.13	2932500	13	29	NbD010426.1;NbD011591.1	NbD010426.1;NbD011591.1	833
NaN	NaN	NaN	NaN	NaN	NaN				-1	2	2	1	13.6	13.6	6.1	24.436	0.00123	10.747	38414	9	1	NbE03060933.1;NbD051257.1;NbD010431.1;NbE44071522.1;NbD046913.1	NbE03060933.1;NbD051257.1;NbD010431.1;NbE44071522.1;NbD046913.1	834
NaN	NaN	NaN	NaN	NaN	NaN				-1	3	1	1	17.3	8	8	28.363	0.0012116	9.9808	52111	9	1	NbD010443.1	NbD010443.1	835
NaN	NaN	17.798	17.7251	NaN	18.3779				-1	1	1	1	5.2	5.2	5.2	38.215	0.0011628	8.7225	1239100	19	9	NbD010453.1	NbD010453.1	836
NaN	NaN	NaN	16.3895	16.4147	NaN				-1	3	3	2	7.1	7.1	4.9	49.885	0	17.302	442040	22	7	NbE05066035.1;NbD010457.1;NbE05064174.1;NbE03057777.1;NbD043785.1	NbE05066035.1;NbD010457.1;NbE05064174.1;NbE03057777.1;NbD043785.1	837
17.2481	NaN	17.0918	NaN	17.0375	NaN				-1	6	6	5	18.8	18.8	13.7	47.02	0	42.672	836650	20	11	NbD010469.1;NbE03060628.1;NbD018279.1	NbD010469.1;NbE03060628.1;NbD018279.1	838
NaN	NaN	NaN	NaN	NaN	NaN				-1	2	2	2	6.1	6.1	6.1	60.522	0	13.234	162460	24	6	NbE03057263.1;NbD018287.1;NbD010472.1;NbE44071724.1;NbD024415.1;NbD002752.1;NbD005914.1;NbE03057968.1;NbD043171.1	NbE03057263.1;NbD018287.1;NbD010472.1;NbE44071724.1;NbD024415.1;NbD002752.1;NbD005914.1;NbE03057968.1;NbD043171.1	839
NaN	16.6987	NaN	16.5859	NaN	NaN				-1	4	4	1	22.9	22.9	6.6	34.243	0	34.551	457500	15	8	NbD010494.1	NbD010494.1	840
17.1147	17.3172	NaN	NaN	NaN	NaN				-1	4	4	4	12.7	12.7	12.7	54.661	0	49.999	754240	24	10	NbD010512.1	NbD010512.1	841
15.671	NaN	15.7593	NaN	15.8318	NaN				-1	4	4	2	13.6	13.6	8.6	57.838	0	33.341	541700	28	12	NbD010514.1;NbD041670.1;NbD044139.1;NbE03053968.1	NbD010514.1;NbD041670.1;NbD044139.1;NbE03053968.1	842
NaN	NaN	NaN	NaN	NaN	NaN				-1	2	2	1	9.8	9.8	9.8	15.836	0	11.831	243260	9	3	NbD010517.1	NbD010517.1	843
NaN	NaN	NaN	15.544	15.2111	NaN				-1	2	2	2	5.6	5.6	5.6	27.357	0	16.53	340740	10	7	NbE05064089.1;NbE03056344.1;NbD050253.1;NbD038517.1;NbD037796.1;NbD034903.1;NbD010526.1	NbE05064089.1;NbE03056344.1;NbD050253.1;NbD038517.1;NbD037796.1;NbD034903.1;NbD010526.1	844
17.7311	17.5694	17.5601	17.2872	17.5025	17.1227				-1	9	9	1	33	33	3	46.433	0	90.455	3259900	22	32	NbD010539.1	NbD010539.1	845
NaN	NaN	NaN	NaN	NaN	NaN				-1	1	1	1	9.8	9.8	9.8	14.02	0.0019206	6.715	211450	7	3	NbD010563.1	NbD010563.1	846
NaN	NaN	NaN	NaN	NaN	NaN				-1	2	2	2	2	2	2	174.02	0	13.02	156630	82	2	NbD010568.1;NbD036359.1;NbE05063032.1	NbD010568.1;NbD036359.1;NbE05063032.1	847
NaN	NaN	NaN	NaN	NaN	NaN				-1	8	1	1	34.1	6.4	6.4	37.658	0	14.568	843060	19	5	NbD010574.1;NbE05067333.1	NbD010574.1;NbE05067333.1	848
NaN	NaN	NaN	NaN	NaN	NaN				-1	15	1	1	44	6.1	6.1	41.756	0.0016377	6.8879	87839	21	1	NbD010579.1;NbD018538.1;NbD039575.1;NbD016167.1;NbD000024.1	NbD010579.1;NbD018538.1;NbD039575.1;NbD016167.1	849
NaN	NaN	NaN	NaN	NaN	NaN				-1	1	1	1	4.1	4.1	4.1	42.638	0.0010608	7.6095	69228	23	2	NbD010593.1;NbD010593.2	NbD010593.1;NbD010593.2	850
18.9202	18.4636	18.5956	18.5727	18.6754	18.59				-1	10	10	3	32	32	5.8	50.499	0	107.98	9159600	21	63	NbD035995.1;NbD010600.1;NbE44072225.1;NbD005390.1	NbD035995.1;NbD010600.1;NbE44072225.1	851
NaN	NaN	NaN	NaN	NaN	NaN				-1	2	2	2	5.7	5.7	5.7	34.093	0	14.303	102540	13	2	NbD010605.1;NbD035999.1	NbD010605.1;NbD035999.1	852
NaN	NaN	NaN	NaN	NaN	NaN				-1	1	1	1	6	6	6	35.979	0.0048795	6.3438	19739	18	2	NbD010619.1	NbD010619.1	853
15.6049	NaN	15.8255	NaN	NaN	NaN				-1	4	4	4	5.6	5.6	5.6	85.156	0	23.837	264620	41	7	NbD031780.1;NbD010646.1	NbD031780.1;NbD010646.1	854
19.1811	19.3156	19.4158	19.7068	19.7422	19.9535				-1	7	7	3	18.5	18.5	7.6	49.745	0	74.905	10124000	23	35	NbD019274.1;NbD023165.1;NbD010647.1;NbE03055415.1;NbD034666.1;NbD014003.1;NbD035848.1;NbD049317.1;NbD023141.1;NbD031389.1;NbD041465.1;NbD052009.1;NbE44073149.1;NbD005893.1	NbD019274.1;NbD023165.1;NbD010647.1;NbE03055415.1;NbD034666.1;NbD014003.1;NbD035848.1;NbD049317.1;NbD023141.1;NbD031389.1	855
NaN	NaN	NaN	NaN	NaN	NaN				-1	1	1	1	4.3	4.3	4.3	60.782	0.00082542	11.007	54785	23	2	NbD010658.1	NbD010658.1	856
NaN	NaN	NaN	NaN	NaN	NaN				-1	4	4	4	9.3	9.3	9.3	66.284	0	41.078	1032800	30	9	NbD010675.1;NbE05068025.1;NbD001429.1	NbD010675.1;NbE05068025.1;NbD001429.1	857
NaN	NaN	NaN	NaN	NaN	NaN				-1	4	1	1	24.2	9.5	9.5	29.339	0	15.722	597420	8	6	NbD010683.1;NbD012017.1	NbD010683.1;NbD012017.1	858
NaN	NaN	NaN	NaN	NaN	NaN				-1	1	1	1	1.8	1.8	1.8	73.557	0.0066066	6.2562	58351	28	3	NbD010703.1	NbD010703.1	859
18.5075	18.4351	18.5036	18.0294	18.2283	18.3856				-1	9	9	8	22.8	22.8	21.2	53.552	0	112.39	3545300	30	29	NbE05065810.1;NbD012978.1;NbD010721.1	NbE05065810.1;NbD012978.1;NbD010721.1	860
NaN	NaN	NaN	NaN	NaN	NaN				-1	1	1	1	12.3	12.3	12.3	30.461	0	21.474	418270	6	5	NbD010727.1	NbD010727.1	861
NaN	NaN	NaN	NaN	NaN	NaN				-1	1	1	1	2	2	2	63.977	0.0017153	7.285	391180	18	5	NbD010749.1	NbD010749.1	862
20.3215	21.6066	20.7744	21.3898	20.963	21.7657				-1	5	5	1	36.8	36.8	13.2	17.541	0	139.18	17631000	8	23	NbD010804.1;NbD010758.1;NbE05066957.1;NbD044351.1;NbD026178.1	NbD010804.1;NbD010758.1;NbE05066957.1;NbD044351.1;NbD026178.1	863
18.2136	18.1777	18.1474	18.2354	18.0306	18.234				-1	3	3	3	11.2	11.2	11.2	47.811	0	33.003	2468600	22	17	NbD010775.1;NbD023935.1	NbD010775.1	864
NaN	NaN	NaN	NaN	NaN	NaN				-1	2	2	2	7.8	7.8	7.8	34.078	0	16.246	327860	17	3	NbD010787.1;NbD023946.1	NbD010787.1;NbD023946.1	865
NaN	NaN	NaN	NaN	NaN	NaN				-1	2	2	2	13.2	13.2	13.2	18.957	0	13.082	430880	8	4	NbD010790.1;NbD003648.1	NbD010790.1;NbD003648.1	866
17.0988	17.0894	16.5025	18.2217	17.0949	18.0471				-1	9	9	4	43.2	43.2	22.6	16.389	0	71.493	3359400	10	32	NbD019774.1;NbD010796.1	NbD019774.1;NbD010796.1	867
NaN	NaN	NaN	NaN	NaN	NaN				-1	1	1	1	9	9	9	20.354	0.0046397	6.428	25110	10	2	NbE03060490.1;NbD024353.1;NbE05065686.1;NbD010834.1	NbE03060490.1;NbD024353.1;NbE05065686.1;NbD010834.1	869
NaN	NaN	NaN	NaN	NaN	NaN				-1	1	1	1	7.2	7.2	7.2	22	0	73.847	705760	7	6	NbD024152.1;NbD010859.1	NbD024152.1;NbD010859.1	870
NaN	NaN	NaN	NaN	NaN	NaN				-1	3	3	1	13.5	13.5	6	30.688	0	16.394	378180	15	5	NbD010898.1;NbD016250.1	NbD010898.1;NbD016250.1	871
NaN	NaN	NaN	NaN	NaN	NaN				-1	2	2	2	5.9	5.9	5.9	73.462	0	14.295	299870	37	5	NbE03053900.1;NbD010909.1;NbE05064473.1;NbD051678.1	NbE03053900.1;NbD010909.1;NbE05064473.1;NbD051678.1	872
NaN	NaN	NaN	NaN	NaN	NaN				-1	1	1	1	4.1	4.1	4.1	41.359	0.0011995	9.5385	45899	18	2	NbE44071640.1;NbD047884.1;NbD010911.1	NbE44071640.1;NbD047884.1;NbD010911.1	873
NaN	NaN	NaN	15.8115	NaN	15.717				-1	2	2	2	3.7	3.7	3.7	72.822	0	12.539	209610	26	5	NbD010913.1;NbD047883.1	NbD010913.1;NbD047883.1	874
NaN	NaN	NaN	NaN	NaN	NaN				-1	2	2	2	13.1	13.1	13.1	26.085	0	16.106	519030	12	6	NbE44072982.1;NbE03054976.1;NbE05065487.1;NbE03060184.1;NbD030358.1;NbD010926.1;NbD041181.1;NbD048640.1	NbE44072982.1;NbE03054976.1;NbE05065487.1;NbE03060184.1;NbD030358.1;NbD010926.1;NbD041181.1;NbD048640.1	875
NaN	16.7508	NaN	16.9172	NaN	NaN				-1	2	2	2	14.1	14.1	14.1	34.254	0	17.896	556610	16	7	NbD010954.1;NbE05067852.1	NbD010954.1;NbE05067852.1	876
NaN	16.272	15.3289	16.0217	NaN	15.993				-1	2	2	2	4.9	4.9	4.9	63.617	0	17.282	509990	24	12	NbE44072964.1;NbD038437.1;NbD010960.1	NbE44072964.1;NbD038437.1;NbD010960.1	877
NaN	NaN	NaN	NaN	NaN	NaN				-1	1	1	1	12.6	12.6	12.6	10.809	0.0016852	7.1432	444450	4	6	NbD038435.1;NbD010962.1	NbD038435.1;NbD010962.1	878
17.9479	18.0439	17.8229	17.8385	17.6308	17.6257				-1	15	9	9	25.8	20.3	20.3	64.435	0	128.9	4682200	35	49	NbD044203.1;NbD010968.1	NbD044203.1;NbD010968.1	879
NaN	NaN	NaN	NaN	NaN	NaN				-1	1	1	1	6.4	6.4	6.4	48.766	0.0011359	8.1921	116570	21	2	NbD010985.1	NbD010985.1	881
NaN	NaN	NaN	NaN	NaN	NaN				-1	2	2	2	4.2	4.2	4.2	73.873	0	12.073	125540	33	4	NbD046378.1;NbD010986.1	NbD046378.1;NbD010986.1	882
18.0656	17.7569	18.0123	18.1128	18.6895	18.169				-1	7	7	2	26.1	26.1	4.2	44.29	0	81.234	2862900	18	25	NbD010989.1	NbD010989.1	883
NaN	NaN	NaN	17.009	16.6598	16.9448				-1	3	3	3	6	6	6	94.826	0	37.595	969870	41	12	NbD010990.1;NbD041092.1;NbD040313.1	NbD010990.1;NbD041092.1	884
NaN	17.9413	17.9557	18.1024	17.7524	18.0938				-1	12	12	11	47	47	40	41.235	0	123.45	2901900	21	28	NbD011005.1;NbD037366.1	NbD011005.1;NbD037366.1	885
17.2352	17.2797	17.3733	17.1078	17.0995	17.0749				-1	3	3	3	34.5	34.5	34.5	19.799	0	29.524	1566100	12	18	NbD037367.1;NbD011006.1	NbD037367.1;NbD011006.1	886
17.6028	16.7599	17.4988	16.5883	16.9369	16.7676				-1	8	7	7	20	18.2	18.2	75.157	0	60.192	2080000	29	27	NbD011007.1;NbE05066686.1	NbD011007.1;NbE05066686.1	887
NaN	NaN	NaN	NaN	NaN	NaN				-1	1	1	1	6.4	6.4	6.4	24.185	0.0046787	6.4871	26376	14	1	NbD011014.1	NbD011014.1	888
NaN	NaN	NaN	NaN	NaN	NaN				-1	3	1	1	18.8	6.4	6.4	24.35	0.0037951	6.5836	71718	18	2	NbE03054761.1;NbD011033.1	NbE03054761.1;NbD011033.1	889
NaN	NaN	NaN	NaN	NaN	NaN				-1	2	2	1	11.5	11.5	5.3	45.734	0.0012068	9.7042	62399	18	2	NbD011036.1;NbD002701.1	NbD011036.1;NbD002701.1	890
16.816	16.7529	16.7352	16.7955	NaN	16.9171				-1	2	2	2	8.7	8.7	8.7	45.695	0	24.716	814490	28	12	NbD011056.1;NbD035343.1;NbE05066475.1	NbD011056.1;NbD035343.1;NbE05066475.1	891
19.3862	18.8298	19.6543	18.927	19.3812	18.9302				-1	9	9	9	44.6	44.6	44.6	30.093	0	183.56	12194000	13	64	NbD011066.1;NbD049922.1	NbD011066.1;NbD049922.1	892
NaN	NaN	NaN	NaN	NaN	NaN				-1	1	1	1	3.8	3.8	3.8	51.477	0.0011161	7.9794	257960	24	4	NbE03053962.1;NbD011077.1	NbE03053962.1;NbD011077.1	893
NaN	NaN	NaN	NaN	NaN	NaN				-1	2	2	2	3.1	3.1	3.1	86.973	0	13.049	217410	42	5	NbD052898.1;NbD011101.1	NbD052898.1;NbD011101.1	894
NaN	NaN	19.7957	19.7816	NaN	19.4416				-1	3	2	2	28.8	28.8	28.8	8.6217	0	12.559	5523100	2	9	NbD011109.1	NbD011109.1	895
15.6197	NaN	15.6926	NaN	NaN	NaN				-1	3	3	3	2.4	2.4	2.4	234.44	0	21.782	255100	110	7	NbD037230.1;NbE03058348.1;NbD011139.1	NbD037230.1;NbE03058348.1;NbD011139.1	896
17.6234	17.5025	17.7763	17.643	17.7641	17.7382				-1	8	8	2	26.1	26.1	9.1	40.001	0	87.454	4700400	16	44	NbE03057238.1;NbD011189.1	NbE03057238.1;NbD011189.1	898
20.5767	20.2248	20.2793	20.2567	20.3792	20.3002				-1	9	9	1	27.6	27.6	6.3	25.018	0	76.62	26126000	11	51	NbD021567.1;NbD011194.1	NbD021567.1;NbD011194.1	899
NaN	NaN	NaN	NaN	NaN	NaN				-1	4	2	2	24.6	13.5	13.5	31.868	0	13.632	171520	16	3	NbD011202.1;NbE05065177.1	NbD011202.1;NbE05065177.1	900
NaN	NaN	NaN	NaN	NaN	NaN				-1	9	2	2	30.9	9	9	30.475	0	13.026	46738	17	2	NbD029765.1;NbD011204.1	NbD029765.1;NbD011204.1	901
NaN	NaN	NaN	NaN	NaN	NaN				-1	2	2	2	2	2	2	141.41	0	13.344	98224	69	2	NbE05068297.1;NbD011212.1	NbE05068297.1;NbD011212.1	902
NaN	NaN	NaN	NaN	NaN	NaN				-1	1	1	1	22	22	22	10.098	0.0011538	8.5004	142490	6	4	NbD011231.1	NbD011231.1	903
NaN	NaN	NaN	NaN	NaN	NaN				-1	1	1	1	3.6	3.6	3.6	32.519	0.0099619	6.0855	39279	13	1	NbD036189.1;NbD011232.1	NbD036189.1;NbD011232.1	904
NaN	NaN	NaN	NaN	NaN	NaN				-1	1	1	1	10.1	10.1	10.1	14.138	0.0046196	6.3966	123980	5	2	NbD011239.1;NbE03053843.1;NbD012521.1	NbD011239.1;NbE03053843.1;NbD012521.1	905
NaN	NaN	NaN	NaN	NaN	NaN				-1	3	1	1	7.1	2.2	2.2	55.143	0.0019194	6.7102	232130	25	5	NbD011243.1;NbE03054887.1;NbD028837.1	NbD011243.1;NbE03054887.1;NbD028837.1	906
NaN	NaN	NaN	NaN	NaN	NaN				-1	7	1	1	20.3	2.7	2.7	48.01	0.0012063	9.6756	660570	18	6	NbD011249.1	NbD011249.1	907
NaN	NaN	NaN	NaN	NaN	NaN				-1	3	1	1	7.8	2.9	2.9	49.41	0.004654	6.4512	22917	25	1	NbE05064203.1;NbD012769.1;NbD011279.1	NbE05064203.1;NbD012769.1;NbD011279.1	908
NaN	NaN	NaN	NaN	NaN	NaN				-1	1	1	1	7.4	7.4	7.4	21.055	0.0011429	8.2927	144170	12	4	NbD022841.1;NbD011290.1	NbD022841.1;NbD011290.1	909
NaN	NaN	NaN	NaN	NaN	NaN				-1	2	2	2	2.9	2.9	2.9	89.134	0	11.656	186420	46	5	NbD011293.1;NbE44073586.1	NbD011293.1;NbE44073586.1	910
17.2283	NaN	16.9627	16.6633	16.7698	16.9018				-1	5	5	4	12.6	12.6	9.4	66.415	0	35.991	1360600	27	16	NbD011305.1;NbD015433.1	NbD011305.1;NbD015433.1	911
NaN	NaN	NaN	NaN	NaN	NaN				-1	4	4	3	15.9	15.9	11.9	35.736	0	23.787	392930	18	7	NbD011324.1;NbE03058850.1;NbD025940.1	NbD011324.1;NbE03058850.1;NbD025940.1	912
NaN	NaN	NaN	NaN	NaN	NaN				-1	1	1	1	1.9	1.9	1.9	92.296	0	16.269	178240	36	5	NbE03057578.1;NbD012629.1;NbD011400.1	NbE03057578.1;NbD012629.1;NbD011400.1	913
NaN	NaN	NaN	NaN	NaN	NaN				-1	9	2	1	28.1	10.2	5.9	34.441	0.0011981	9.4813	52344	15	1	NbE44070068.1;NbD011418.1	NbE44070068.1;NbD011418.1	914
NaN	NaN	NaN	NaN	NaN	NaN				-1	8	2	2	26.8	9.3	9.3	38.262	0	19.707	415400	21	8	NbD011432.1	NbD011432.1	915
NaN	NaN	NaN	NaN	NaN	NaN				-1	1	1	1	15.8	15.8	15.8	20.822	0	12.343	98221	10	5	NbD011439.1;NbD050070.1;NbD027109.1;NbD036346.1	NbD011439.1;NbD050070.1;NbD027109.1;NbD036346.1	916
NaN	NaN	NaN	NaN	NaN	NaN				-1	1	1	1	12	12	12	17.548	0.0011605	8.6473	311770	10	6	NbD011443.1	NbD011443.1	917
19.5439	19.3136	19.8631	19.9855	20.182	20.1195				-1	28	2	2	58.6	8.1	8.1	42.753	0	127.72	11992000	21	18	NbD011459.1;NbE44069821.1	NbD011459.1;NbE44069821.1	918
NaN	NaN	NaN	NaN	NaN	NaN				-1	3	3	3	6.6	6.6	6.6	77.099	0	30.576	329240	33	8	NbD011462.1	NbD011462.1	919
NaN	NaN	NaN	NaN	NaN	NaN				-1	5	1	1	9.6	1.8	1.8	80.403	0.0025478	6.6544	83370	41	2	NbD011464.1	NbD011464.1	920
NaN	17.3914	17.3257	17.5767	17.3535	17.4298				-1	7	7	7	33	33	33	32.427	0	56.392	2493700	17	23	NbD037094.1;NbD011495.1;NbE05064931.1;NbE44071003.1	NbD037094.1;NbD011495.1	921
NaN	NaN	17.9022	17.632	NaN	NaN				-1	2	2	2	7.3	7.3	7.3	34.995	0	12.948	681740	12	7	NbD011498.1;NbE44070999.1;NbD050339.1;NbE44072495.1	NbD011498.1;NbE44070999.1;NbD050339.1;NbE44072495.1	922
NaN	NaN	16.3277	NaN	16.4916	16.3798				-1	9	4	3	16.3	7.7	7.7	78.435	0	64.814	616220	34	11	NbE03053472.1;NbD011512.1	NbE03053472.1;NbD011512.1	923
NaN	NaN	NaN	NaN	NaN	NaN				-1	1	1	1	3.1	3.1	3.1	46.98	0.0017253	7.3378	21853	24	1	NbD011519.1	NbD011519.1	924
NaN	NaN	NaN	NaN	NaN	NaN				-1	1	1	1	5	5	5	29.451	0.0093952	6.0999	61754	14	1	NbD050514.1;NbD011522.1	NbD050514.1;NbD011522.1	925
NaN	NaN	NaN	NaN	NaN	NaN				-1	1	1	1	2.1	2.1	2.1	74.261	0.0016835	7.141	85265	25	3	NbD011527.1;NbE44074056.1;NbD014827.1	NbD011527.1;NbE44074056.1;NbD014827.1	926
NaN	17.0563	NaN	16.9343	NaN	16.8267				-1	4	4	4	6.2	6.2	6.2	90.651	0	45.492	851400	43	13	NbD046455.1;NbD011528.1	NbD046455.1;NbD011528.1	927
19.8536	19.1946	19.8791	19.2989	19.7119	19.2623				-1	5	5	5	19.2	19.2	19.2	39.207	0	237.97	10361000	16	33	NbD011552.2;NbD011552.1	NbD011552.2;NbD011552.1	928
NaN	NaN	NaN	NaN	NaN	NaN				-1	1	1	1	9.7	9.7	9.7	16.099	0.0054331	6.2927	1422500	10	3	NbE03057255.1;NbD038348.1;NbE03059549.1;NbD019419.1;NbD011561.1	NbE03057255.1;NbD038348.1;NbE03059549.1;NbD019419.1;NbD011561.1	929
NaN	NaN	NaN	NaN	NaN	NaN				-1	1	1	1	8.5	8.5	8.5	22.49	0.0094062	6.1059	45921	12	1	NbE05066088.1;NbE44070664.1;NbE05068669.1;NbD019421.1;NbD011565.1	NbE05066088.1;NbE44070664.1;NbE05068669.1;NbD019421.1;NbD011565.1	930
17.665	17.3013	17.8185	NaN	17.8542	NaN				-1	7	7	4	19	19	12.9	59.934	0	45.251	1807300	33	18	NbD019062.1;NbD011570.1;NbD036347.1;NbD008195.1;NbD047900.1;NbE44074627.1	NbD019062.1;NbD011570.1	931
NaN	NaN	NaN	NaN	NaN	NaN				-1	1	1	1	4.3	4.3	4.3	22.508	0.0031817	6.6486	156250	12	4	NbD011981.1;NbD011585.1	NbD011981.1;NbD011585.1	932
NaN	NaN	NaN	NaN	NaN	NaN				-1	1	1	1	4.3	4.3	4.3	29.635	0.0016507	6.9342	89696	13	2	NbD011600.1	NbD011600.1	933
18.1639	18.0778	18.0275	17.593	17.5666	17.4521				-1	5	5	3	28.8	28.8	21.6	24.989	0	39.23	2115700	14	20	NbD011626.1;NbD049530.1;NbD016403.1	NbD011626.1;NbD049530.1;NbD016403.1	934
18.7656	17.8297	18.4009	17.3809	17.6742	17.5134				-1	7	7	6	19.6	19.6	14.6	40.186	0	55.42	4486100	17	39	NbD011628.1	NbD011628.1	935
NaN	NaN	NaN	NaN	NaN	NaN				-1	1	1	1	6.8	6.8	6.8	31.008	0.0016728	7.1038	11568	16	1	NbD049114.1;NbD011630.1;NbD025155.1	NbD049114.1;NbD011630.1;NbD025155.1	936
19.6099	19.2797	19.337	18.7748	19.1488	18.8613				-1	7	5	5	19.7	17	17	42.909	0	166.34	9666400	19	36	NbD011638.1;NbD027256.1	NbD011638.1;NbD027256.1	937
18.8746	18.4381	18.7737	18.4363	18.9132	18.4921				-1	6	6	4	33.2	33.2	24.1	33.419	0	72.071	5732700	17	29	NbD011646.1	NbD011646.1	938
NaN	NaN	NaN	NaN	NaN	NaN				-1	19	2	2	45.8	7.1	7.1	58.853	0	22.885	941550	29	7	NbE03056541.1;NbD048341.1;NbD011647.1	NbE03056541.1;NbD048341.1;NbD011647.1	939
NaN	NaN	NaN	NaN	NaN	NaN				-1	12	2	2	19.7	3.3	3.3	98.121	0	19.586	1209400	55	7	NbD011652.1;NbE03055451.1	NbD011652.1	940
NaN	NaN	NaN	NaN	NaN	NaN				-1	1	1	1	10.5	10.5	10.5	16.167	0	16.579	915080	9	6	NbD017944.1;NbD011654.1	NbD017944.1;NbD011654.1	941
NaN	NaN	NaN	NaN	NaN	NaN				-1	1	1	1	4	4	4	46.626	0.0017489	7.5161	17569	21	1	NbE05064838.1;NbD011662.1	NbE05064838.1;NbD011662.1	942
NaN	NaN	NaN	NaN	NaN	NaN				-1	2	2	2	6.8	6.8	6.8	21.327	0	12.548	205370	14	6	NbE03057086.1;NbD046290.1;NbD011674.1	NbE03057086.1;NbD046290.1;NbD011674.1	943
16.1216	16.579	16.0634	16.2726	15.7913	NaN				-1	8	3	2	29.5	15.2	8.9	24.642	0	29.586	695770	14	13	NbD011688.1;NbD052986.1;NbD045274.1;NbD025879.1;NbD034578.1	NbD011688.1	944
18.3521	17.8691	18.2209	17.6756	18.2419	17.7644				-1	8	8	8	22.2	22.2	22.2	39.06	0	119.37	7898400	17	51	NbD011698.1;NbD050728.1	NbD011698.1	945
NaN	NaN	NaN	NaN	NaN	NaN				-1	1	1	1	5.1	5.1	5.1	33.929	0.001105	7.8976	10517	11	2	NbE05063204.1;NbD011740.1;NbD011740.2	NbE05063204.1;NbD011740.1;NbD011740.2	946
15.4178	14.7372	15.1256	NaN	NaN	NaN				-1	9	9	9	10.5	10.5	10.5	130.6	0	72.82	448180	66	15	NbE03055149.1;NbD011751.1	NbE03055149.1;NbD011751.1	947
NaN	NaN	NaN	NaN	NaN	NaN				-1	4	1	1	18.8	6.2	6.2	43.285	0.0048855	6.3507	56955	15	2	NbD011753.1	NbD011753.1	948
NaN	NaN	NaN	NaN	NaN	NaN				-1	2	2	2	6.6	6.6	6.6	52.071	0	14.345	387540	26	5	NbD049650.1;NbE05066559.1;NbD011756.1	NbD049650.1;NbE05066559.1;NbD011756.1	949
17.005	16.9235	17.006	17.0173	17.0598	17.3123				-1	12	12	12	22.6	22.6	22.6	87.773	0	110.33	2903900	42	47	NbD011778.1;NbD043052.1;NbE03058543.1	NbD011778.1;NbD043052.1;NbE03058543.1	950
17.8739	17.9021	17.831	17.6692	17.6339	17.8392				-1	7	7	5	26.3	26.3	19.6	49.45	0	81.695	2088300	22	20	NbD011790.1	NbD011790.1	951
NaN	17.9474	NaN	17.5809	NaN	17.4036				-1	3	3	3	11.9	11.9	11.9	29.428	0	30.538	976390	13	11	NbD013589.1;NbD011813.1	NbD013589.1;NbD011813.1	952
NaN	NaN	NaN	NaN	NaN	NaN				-1	1	1	1	17.4	17.4	17.4	10.257	0.0010799	7.6899	460360	4	5	NbD045665.1;NbD018585.1;NbD013593.1;NbD011816.1;NbD026215.1	NbD045665.1;NbD018585.1;NbD013593.1;NbD011816.1;NbD026215.1	953
NaN	17.8601	NaN	17.6175	NaN	17.5948				-1	6	1	1	23.3	5.8	5.8	30.037	0	16.98	1553600	15	13	NbD011824.1;NbD051455.1	NbD011824.1;NbD051455.1	954
NaN	NaN	NaN	NaN	NaN	NaN				-1	2	2	2	4.6	4.6	4.6	66.106	0	12.691	172130	31	5	NbD011841.1;NbE05067041.1;NbD039704.1;NbE44073793.1	NbD011841.1;NbE05067041.1;NbD039704.1;NbE44073793.1	955
NaN	NaN	NaN	NaN	NaN	NaN				-1	1	1	1	13.7	13.7	13.7	13.82	0	31.078	2060700	4	6	NbD039705.1;NbD011842.1	NbD039705.1;NbD011842.1	956
NaN	16.1813	NaN	16.2432	NaN	16.2924				-1	3	3	3	3.6	3.6	3.6	137.34	0	56.225	503110	59	9	NbD011846.1	NbD011846.1	957
22.4887	22.0544	22.5462	22.106	22.2168	22.0053				-1	30	30	13	56.1	56.1	28.7	56.819	0	323.31	242020000	24	225	NbD011866.1	NbD011866.1	958
NaN	NaN	NaN	NaN	NaN	NaN				-1	3	2	2	6.4	4.2	4.2	84.686	0	14.191	71814	34	2	NbD011919.1;NbD052566.1;NbE05068225.1	NbD011919.1;NbD052566.1	959
15.918	NaN	15.6252	NaN	15.8422	NaN				-1	2	2	2	7.7	7.7	7.7	63.743	0	15.315	368870	32	8	NbD011928.1;NbE03059035.1	NbD011928.1;NbE03059035.1	960
NaN	NaN	NaN	NaN	NaN	NaN				-1	2	2	1	9.1	9.1	5.9	62.447	0	12.941	27480	24	1	NbD011939.1;NbE03055787.1	NbD011939.1;NbE03055787.1	961
NaN	NaN	NaN	NaN	NaN	NaN				-1	1	1	1	3.2	3.2	3.2	55.957	0.0010819	7.702	90715	34	3	NbD027939.1;NbD011942.1	NbD027939.1;NbD011942.1	962
20.3972	20.194	20.4889	20.3271	20.423	20.1976				-1	5	5	4	29.8	29.8	24.7	30.788	0	69.083	17907000	16	45	NbD011985.1	NbD011985.1	963
NaN	NaN	NaN	NaN	NaN	NaN				-1	7	1	0	30.1	8	0	33.187	0	13.184	911200	17	9	NbD011993.1	NbD011993.1	964
NaN	NaN	NaN	NaN	NaN	NaN				-1	1	1	1	2.1	2.1	2.1	66.109	0.0016661	7.051	214260	28	6	NbD043605.1;NbD011994.1	NbD043605.1;NbD011994.1	965
17.8633	17.6779	17.8141	17.7425	17.9698	17.3738				-1	16	16	2	53.2	53.2	8.2	47.175	0	291.65	6836300	24	76	NbD012001.1	NbD012001.1	966
NaN	NaN	NaN	NaN	NaN	NaN				-1	8	1	1	24.3	3.2	3.2	40.515	0.0044122	6.5563	403770	23	5	NbD012011.1	NbD012011.1	967
NaN	17.2864	NaN	17.5786	NaN	NaN				-1	1	1	1	21.7	21.7	21.7	8.0836	0	29.135	750980	3	8	NbD042901.1;NbD036606.1;NbD034752.1;NbD012039.1	NbD042901.1;NbD036606.1;NbD034752.1;NbD012039.1	968
16.081	15.9996	NaN	16.0562	15.9674	NaN				-1	4	4	4	21.5	21.5	21.5	25.575	0	25.97	541550	11	11	NbD012047.1;NbD005359.1	NbD012047.1;NbD005359.1	969
NaN	NaN	NaN	16.0944	16.9336	NaN				-1	4	4	4	28	28	28	20.964	0	26.371	601030	12	9	NbD012056.1;NbE05067695.1;NbD025307.1	NbD012056.1;NbE05067695.1;NbD025307.1	970
18.1149	17.8394	18.0419	17.6112	17.849	17.5573				-1	14	14	3	29.2	29.2	5.7	59.852	0	137.98	4489200	32	61	NbD012059.1	NbD012059.1	971
NaN	NaN	NaN	NaN	NaN	NaN				-1	1	1	1	32.7	32.7	32.7	10.549	0.00171	7.2605	230390	6	4	NbD012061.1	NbD012061.1	972
NaN	NaN	NaN	NaN	NaN	NaN				-1	3	1	1	7.8	2.5	2.5	47.982	0.0080357	6.1836	117300	18	3	NbD012072.1	NbD012072.1	973
NaN	NaN	NaN	NaN	NaN	NaN				-1	1	1	1	4.4	4.4	4.4	46.805	0.0017129	7.2769	17376	25	1	NbD012131.1	NbD012131.1	974
20.4569	20.1726	20.5438	19.8833	20.7753	20.1314				-1	5	5	5	15.5	15.5	15.5	30.444	0	36.013	8278300	17	16	NbD012133.1;NbD027840.1;NbE44071464.1	NbD012133.1;NbD027840.1	975
NaN	NaN	NaN	NaN	NaN	NaN				-1	1	1	1	4.2	4.2	4.2	57.77	0.0012151	10.117	417060	19	4	NbD027841.1;NbD012134.1	NbD027841.1;NbD012134.1	976
NaN	NaN	NaN	NaN	NaN	NaN				-1	2	2	1	7	7	4.1	66.099	0.0011909	9.23	17027	32	1	NbD027845.1;NbD012141.1	NbD027845.1;NbD012141.1	977
NaN	NaN	NaN	NaN	NaN	NaN				-1	1	1	1	10.2	10.2	10.2	19.658	0.0074918	6.2279	114340	8	2	NbD020526.1;NbD012147.1	NbD020526.1;NbD012147.1	978
18.6373	18.3428	18.4301	18.4411	18.2242	18.1862				-1	6	6	6	22.7	22.7	22.7	30.365	0	66.873	5131500	15	39	NbD012148.1;NbD020527.1	NbD012148.1;NbD020527.1	979
NaN	NaN	NaN	NaN	NaN	NaN				-1	1	1	1	4.8	4.8	4.8	35.955	0.0016689	7.0712	53125	19	2	NbD020533.1;NbD020531.1;NbD012155.1	NbD020533.1;NbD020531.1;NbD012155.1	980
NaN	NaN	NaN	NaN	NaN	NaN				-1	2	2	2	4.5	4.5	4.5	81.697	0	12.674	44394	36	2	NbD012162.1;NbE05067999.1;NbD020535.1	NbD012162.1;NbE05067999.1;NbD020535.1	981
NaN	NaN	NaN	NaN	NaN	NaN				-1	2	2	2	13	13	13	33.628	0	12.217	69124	13	2	NbE03059407.1;NbD048731.1;NbD012169.1	NbE03059407.1;NbD048731.1;NbD012169.1	982
NaN	NaN	NaN	NaN	NaN	NaN				-1	4	4	2	8.3	8.3	3.6	92.415	0	25.286	365800	47	7	NbE03056198.1;NbD012184.1;NbE44073470.1;NbD043289.1	NbE03056198.1;NbD012184.1;NbE44073470.1;NbD043289.1	983
NaN	NaN	NaN	NaN	NaN	NaN				-1	4	2	2	14.3	7.8	7.8	54.225	0	13.693	285970	21	4	NbD012210.1;NbE03060165.1;NbD025715.1	NbD012210.1;NbE03060165.1;NbD025715.1	984
NaN	NaN	NaN	NaN	NaN	NaN				-1	1	1	1	5.3	5.3	5.3	28.603	0.0017464	7.5042	260620	11	3	NbD028628.1;NbD021027.1;NbD015224.1;NbD012244.1	NbD028628.1;NbD021027.1;NbD015224.1;NbD012244.1	985
NaN	NaN	NaN	NaN	NaN	NaN				-1	9	1	1	23.3	4.8	4.8	47.474	0.0011029	7.8909	853570	18	6	NbE03062031.1;NbD012263.1	NbE03062031.1;NbD012263.1	986
18.5166	18.71	18.5051	18.6984	18.3293	18.5574				-1	12	12	2	28.5	28.5	7.4	47.727	0	213.4	10559000	18	75	NbD012265.1;NbE03054480.1	NbD012265.1;NbE03054480.1	987
20.2327	20.237	20.1021	20.0632	19.9895	19.9263				-1	16	16	6	50	50	20.2	51.778	0	323.31	16125000	30	72	NbD012284.1;NbD014990.1;NbD021385.1;NbE03054611.1;NbD026379.1	NbD012284.1	988
NaN	NaN	NaN	16.7334	NaN	16.6077				-1	3	3	1	10.9	10.9	4.7	43.22	0	19.532	651640	27	8	NbD012306.1;NbD026961.1;NbD026305.1	NbD012306.1;NbD026961.1;NbD026305.1	989
NaN	NaN	NaN	NaN	NaN	NaN				-1	7	1	1	20.9	4.3	4.3	41.124	0.0010838	7.7106	227740	17	4	NbE05067443.1;NbD012326.1	NbE05067443.1;NbD012326.1	990
NaN	NaN	NaN	NaN	NaN	NaN				-1	9	1	1	34.1	8.5	8.5	29.238	0.0010866	7.7442	559420	13	5	NbD012332.1	NbD012332.1	991
NaN	NaN	NaN	NaN	NaN	NaN				-1	2	2	2	14.6	14.6	14.6	26.234	0	30.888	107350	16	4	NbD012335.1;NbE44071746.1;NbD020124.1	NbD012335.1;NbE44071746.1;NbD020124.1	992
NaN	NaN	NaN	NaN	NaN	NaN				-1	1	1	1	6.3	6.3	6.3	17.658	0.0054348	6.2939	42407	10	1	NbD048441.1;NbD047843.1;NbD037633.1;NbD033828.1;NbD016800.1;NbD012346.1	NbD048441.1;NbD047843.1;NbD037633.1;NbD033828.1;NbD016800.1;NbD012346.1	993
NaN	NaN	NaN	NaN	NaN	NaN				-1	1	1	1	1.3	1.3	1.3	84.141	0.00192	6.7105	81080	35	2	NbD012381.1;NbE44072112.1;NbD047751.1	NbD012381.1;NbE44072112.1;NbD047751.1	994
18.6533	18.7217	18.4355	18.4493	18.4884	18.4424				-1	16	16	6	47.4	47.4	20.4	42.953	0	163.14	8220100	21	70	NbD012395.1;NbE44070424.1	NbD012395.1	995
18.3024	17.6738	18.1678	17.7183	18.1487	17.5837				-1	5	5	4	32.2	32.2	27	24.668	0	89.619	4246200	10	26	NbD012410.1;NbE03059259.1;NbD022339.1;NbE05067756.1	NbD012410.1;NbE03059259.1;NbD022339.1;NbE05067756.1	997
NaN	15.77	15.0656	15.7851	15.3098	NaN				-1	5	5	4	12.1	12.1	10.3	67.023	0	28.718	446230	31	12	NbD012429.1	NbD012429.1	998
NaN	NaN	NaN	NaN	NaN	NaN				-1	8	2	2	19.1	5.7	5.7	70.281	0	97.485	738640	35	7	NbD012435.1	NbD012435.1	999
17.6086	17.176	17.489	18.458	17.1614	18.4613				-1	8	8	2	31.6	31.6	6.5	26.966	0	151.03	3503900	14	25	NbD012444.1;NbD012443.1;NbD045423.1	NbD012444.1;NbD012443.1;NbD045423.1	1000
NaN	NaN	NaN	NaN	NaN	NaN				-1	1	1	1	2.3	2.3	2.3	145.56	0	18.327	23182	58	2	NbE44074041.1;NbD012464.1;NbD026296.1;NbE44074284.1	NbE44074041.1;NbD012464.1;NbD026296.1;NbE44074284.1	1001
15.8304	16.2113	NaN	NaN	NaN	NaN				-1	8	6	5	21	18.6	13.7	46.042	0	43.332	678250	28	13	NbD012465.1;NbD026297.1;NbD025456.1	NbD012465.1;NbD026297.1;NbD025456.1	1002
NaN	NaN	NaN	NaN	NaN	NaN				-1	1	1	1	9.4	9.4	9.4	22.962	0.001228	10.648	1053600	13	6	NbE44070364.1;NbD012468.1	NbE44070364.1;NbD012468.1	1003
NaN	NaN	NaN	NaN	NaN	NaN				-1	1	1	1	8.2	8.2	8.2	31.12	0.0017042	7.2156	132390	15	2	NbD047030.1;NbD012486.1	NbD047030.1;NbD012486.1	1004
NaN	NaN	NaN	NaN	NaN	NaN				-1	1	1	1	15.2	15.2	15.2	14.419	0.0011304	8.0898	69454	8	1	NbD012500.1	NbD012500.1	1005
NaN	NaN	NaN	NaN	NaN	NaN				-1	1	1	1	3.4	3.4	3.4	68.731	0.0017397	7.4663	78168	27	2	NbD012506.1	NbD012506.1	1006
20.4086	18.7436	19.9337	18.5126	19.7609	18.4904				-1	8	4	4	18	11.3	11.3	61.424	0	127.13	5598700	29	21	NbD012525.1	NbD012525.1	1007
18.5048	16.3728	18.5541	16.7064	18.0268	16.9037				-1	13	13	3	31.5	31.5	14.5	61.169	0	196.24	4430600	29	45	NbD012527.1	NbD012527.1	1008
NaN	NaN	NaN	NaN	NaN	NaN				-1	1	1	1	14.9	14.9	14.9	10.607	0.0010981	7.849	164510	5	2	NbE05063336.1;NbE03060385.1;NbD012585.1	NbE05063336.1;NbE03060385.1;NbD012585.1	1009
NaN	NaN	NaN	NaN	NaN	NaN				-1	1	1	1	16.7	16.7	16.7	9.7228	0.0017538	7.5403	76377	5	2	NbE44069992.1;NbD012637.1	NbE44069992.1;NbD012637.1	1010
NaN	NaN	NaN	NaN	NaN	NaN				-1	7	1	1	32.2	12.8	12.8	24.673	0	23.072	462040	7	6	NbD012644.1;NbD024722.1;NbD023955.1;NbD011424.1;NbE03058825.1;NbD041917.1	NbD012644.1;NbD024722.1;NbD023955.1;NbD011424.1;NbE03058825.1;NbD041917.1	1011
NaN	NaN	NaN	NaN	NaN	NaN				-1	1	1	1	4.2	4.2	4.2	23.558	0.0016447	6.9152	58032	9	1	NbD045905.1;NbD012670.1	NbD045905.1;NbD012670.1	1012
19.7657	19.4092	19.9292	19.354	19.7919	19.4506				-1	9	9	1	44.6	44.6	7.8	21.922	0	150.61	18194000	13	69	NbD012676.1;NbD019983.1;NbD029365.1	NbD012676.1;NbD019983.1;NbD029365.1	1013
16.7441	16.2729	NaN	16.3698	17.1801	16.582				-1	4	4	4	26.1	26.1	26.1	23.135	0	29.271	1174400	16	16	NbD041089.1;NbD017688.1;NbD012684.1;NbD019296.1;NbD050026.1;NbD012018.1;NbD010684.1	NbD041089.1;NbD017688.1;NbD012684.1;NbD019296.1;NbD050026.1;NbD012018.1;NbD010684.1	1014
18.8202	18.2896	18.7752	18.5602	18.7458	18.5462				-1	13	13	0	27.1	27.1	0	57.308	0	120.68	7148300	31	52	NbD012685.1	NbD012685.1	1015
NaN	NaN	NaN	NaN	NaN	NaN				-1	1	1	1	4.8	4.8	4.8	34.765	0.004887	6.3517	66754	12	3	NbD012734.1	NbD012734.1	1016
NaN	NaN	NaN	NaN	NaN	NaN				-1	1	1	1	10.8	10.8	10.8	25.458	0.0049035	6.3655	27389	12	1	NbD012737.1	NbD012737.1	1017
NaN	NaN	NaN	NaN	NaN	NaN				-1	1	1	1	4.7	4.7	4.7	46.942	0.0046685	6.4657	28299	11	2	NbD012755.1	NbD012755.1	1018
NaN	NaN	NaN	NaN	NaN	NaN				-1	1	1	1	7.2	7.2	7.2	22.145	0.0016903	7.1649	6417.8	11	1	NbE44073988.1;NbD012780.1	NbE44073988.1;NbD012780.1	1019
14.9089	NaN	15.3032	15.848	NaN	15.8146				-1	1	1	1	6.9	6.9	6.9	36.597	0	16.928	346290	21	9	NbD020822.1;NbD012793.1	NbD020822.1;NbD012793.1	1020
NaN	NaN	NaN	NaN	NaN	NaN				-1	1	1	1	1.9	1.9	1.9	94.737	0.0017446	7.4934	51921	44	2	NbE03056853.1;NbD044542.1;NbD012803.1	NbE03056853.1;NbD044542.1;NbD012803.1	1021
NaN	NaN	NaN	NaN	NaN	NaN				-1	2	1	0	14.6	6.5	0	20.37	0.0071942	6.2354	112550	11	2	NbD012820.1;NbE03054988.1	NbD012820.1;NbE03054988.1	1022
20.4756	20.4357	20.6465	20.4328	20.8411	20.4824				-1	36	14	2	54.3	27.3	8.1	52.672	0	323.31	32144000	23	86	NbD012851.1;NbD052725.1;NbD015971.1;NbE03059648.1	NbD012851.1;NbD052725.1	1023
NaN	16.0747	NaN	16.7867	NaN	16.8631				-1	6	6	2	22.4	22.4	8.3	47.98	0	42.181	620640	23	11	NbD012857.1;NbE05064745.1	NbD012857.1;NbE05064745.1	1024
18.6022	NaN	18.2056	18.4188	NaN	18.4202				-1	6	5	5	21.9	17.1	17.1	43.014	0	116.03	2224100	21	13	NbD042929.1;NbD012861.1	NbD042929.1;NbD012861.1	1025
15.5629	15.7885	15.3705	15.5465	15.6107	15.2258				-1	5	5	5	18.1	18.1	18.1	45.921	0	55.219	702570	23	20	NbD012883.1;NbD025818.1	NbD012883.1;NbD025818.1	1026
NaN	NaN	NaN	NaN	NaN	NaN				-1	2	2	2	14.7	14.7	14.7	10.851	0	18.728	605940	4	3	NbD052250.1;NbD017714.1;NbD017510.1;NbD012902.1	NbD052250.1;NbD017714.1;NbD017510.1;NbD012902.1	1027
NaN	NaN	NaN	NaN	NaN	NaN				-1	1	1	1	3.2	3.2	3.2	53.209	0.0010909	7.7864	515780	22	6	NbD012908.1	NbD012908.1	1028
17.4646	17.7715	17.4672	17.5171	17.4497	17.5072				-1	13	13	1	22.3	22.3	1	74.51	0	113.2	3860700	38	50	NbD012914.1;NbD012914.2;NbD036539.1	NbD012914.1;NbD012914.2	1029
NaN	NaN	NaN	NaN	NaN	NaN				-1	1	1	1	3.6	3.6	3.6	47.956	0.0016239	6.8274	22312	24	1	NbD039153.1;NbD012941.1;NbE44069292.1;NbE05068781.1	NbD039153.1;NbD012941.1;NbE44069292.1;NbE05068781.1	1030
18.2149	17.815	17.662	17.2332	17.5215	17.3274				-1	5	5	5	16.5	16.5	16.5	33.701	0	50.217	2242100	14	18	NbD012946.1	NbD012946.1	1031
NaN	NaN	NaN	NaN	NaN	NaN				-1	1	1	1	2.6	2.6	2.6	63.37	0.0010764	7.6716	331570	30	4	NbD021826.1;NbD012973.1	NbD021826.1;NbD012973.1	1032
NaN	NaN	NaN	NaN	NaN	NaN				-1	3	2	2	13.9	11.1	11.1	39.025	0	13.315	84793	26	2	NbD012987.1;NbD010021.1;NbE05067152.1;NbD014157.1;NbE44072922.1	NbD012987.1;NbD010021.1	1033
18.1875	18.3016	18.081	18.0367	17.9058	17.9824				-1	14	14	2	27.5	27.5	4.1	69.683	0	181.9	9408400	37	77	NbD012999.1;NbE44072059.1	NbD012999.1;NbE44072059.1	1035
16.0175	NaN	15.4481	NaN	NaN	NaN				-1	6	5	4	17.7	14.4	11.6	66.431	0	35.711	395350	30	11	NbD013047.1	NbD013047.1	1036
17.0592	16.2153	NaN	16.741	16.4525	16.3584				-1	8	8	8	12.3	12.3	12.3	57.89	0	59.439	1557600	33	22	NbD013055.1	NbD013055.1	1037
NaN	NaN	NaN	NaN	NaN	NaN				-1	2	2	2	11.2	11.2	11.2	31.654	0	13.733	156020	17	2	NbD013061.1	NbD013061.1	1038
17.6503	17.8252	17.7247	17.9221	18.2497	17.8256				-1	10	10	4	19.5	19.5	5.8	70.051	0	142.32	3775700	35	37	NbE05064389.1;NbD013063.1	NbE05064389.1;NbD013063.1	1039
NaN	NaN	NaN	NaN	NaN	NaN				-1	4	2	2	10.9	4.9	4.9	63.056	0	17.028	173220	35	5	NbD013072.1;NbD000147.1	NbD013072.1	1040
NaN	NaN	NaN	NaN	NaN	NaN				-1	1	1	1	2.7	2.7	2.7	69.807	0.0048691	6.3359	180410	28	2	NbD030237.1;NbE03061200.1;NbD013134.1;NbD039043.1	NbD030237.1;NbE03061200.1;NbD013134.1;NbD039043.1	1041
NaN	NaN	NaN	NaN	NaN	NaN				-1	1	1	1	5.4	5.4	5.4	24.583	0.0011198	8.0125	102540	15	3	NbE05063380.1;NbD013140.1	NbE05063380.1;NbD013140.1	1042
16.4802	NaN	16.481	NaN	NaN	NaN				-1	3	3	3	11.9	11.9	11.9	53.315	0	24.437	690820	34	9	NbE05067052.1;NbD013162.1;NbD048218.1;NbD043120.1;NbD035784.1	NbE05067052.1;NbD013162.1;NbD048218.1	1043
NaN	NaN	NaN	NaN	NaN	NaN				-1	3	3	3	6.7	6.7	6.7	63.375	0	20.287	138840	27	4	NbD013165.1;NbE03058775.1;NbD031148.1;NbE05068768.1	NbD013165.1;NbE03058775.1;NbD031148.1	1044
17.7394	NaN	16.5472	NaN	17.6663	NaN				-1	5	5	3	27.6	27.6	16.1	29.333	0	32.17	934670	10	10	NbD013178.1	NbD013178.1	1045
NaN	NaN	NaN	NaN	NaN	NaN				-1	3	1	1	18.3	9.1	9.1	18.897	0.0017295	7.3662	53268	8	1	NbE44071941.1;NbE05064892.1;NbE05064891.1;NbD013192.1;NbD013189.1;NbD027376.1;NbD003178.1	NbE44071941.1;NbE05064892.1;NbE05064891.1;NbD013192.1;NbD013189.1	1046
NaN	NaN	NaN	NaN	NaN	NaN				-1	1	1	1	9.7	9.7	9.7	16.583	0	13.229	606920	9	7	NbD051368.1;NbD013199.1	NbD051368.1;NbD013199.1	1047
NaN	NaN	NaN	NaN	NaN	NaN				-1	1	1	1	2.2	2.2	2.2	53.565	0.0016926	7.1732	173210	22	4	NbD048086.1;NbD013225.1	NbD048086.1;NbD013225.1	1048
18.7205	18.7536	18.3349	19.0597	18.8193	18.9116				-1	8	8	5	26.9	26.9	16.3	42.532	0	106.34	5369000	23	22	NbD013237.1	NbD013237.1	1049
16.5048	17.624	NaN	NaN	NaN	NaN				-1	4	4	3	14	14	8.9	32.317	0	30.762	1056100	13	10	NbE05067404.1;NbE44073898.1;NbD013238.1	NbE05067404.1;NbE44073898.1;NbD013238.1	1050
NaN	NaN	NaN	NaN	NaN	NaN				-1	1	1	1	1.4	1.4	1.4	89.003	0	13.449	239310	39	3	NbE03055909.1;NbD034101.1;NbD013242.1	NbE03055909.1;NbD034101.1;NbD013242.1	1051
16.6094	16.4429	16.196	16.3462	16.0581	15.92				-1	10	7	6	21.4	17.2	14.4	63.287	0	43.896	977560	37	19	NbD013269.1	NbD013269.1	1052
18.3952	18.1858	18.4592	18.2931	18.1837	17.8485				-1	8	8	8	18.7	18.7	18.7	42.495	0	79.548	4431900	17	25	NbD030112.1;NbD013274.1	NbD030112.1;NbD013274.1	1053
NaN	NaN	NaN	NaN	NaN	NaN				-1	1	1	1	5.5	5.5	5.5	40.284	0.0017229	7.3271	153540	14	4	NbD013278.1	NbD013278.1	1054
17.558	17.5749	NaN	NaN	NaN	NaN				-1	8	2	2	54.9	12.3	12.3	13.546	0	22.925	1016100	9	7	NbD013286.1	NbD013286.1	1055
NaN	NaN	NaN	NaN	NaN	NaN				-1	1	1	1	5.1	5.1	5.1	37.635	0.0011308	8.0919	122600	17	4	NbE05065928.1;NbE03053507.1;NbD013314.1	NbE05065928.1;NbE03053507.1;NbD013314.1	1056
15.9426	15.5344	15.5272	NaN	NaN	NaN				-1	6	6	4	15.2	15.2	9.7	63.254	0	39.884	870840	29	17	NbD025141.1;NbD013327.1	NbD025141.1;NbD013327.1	1057
17.1065	NaN	16.2514	NaN	16.2024	15.4605				-1	5	5	5	11.6	11.6	11.6	55.941	0	31.487	901040	34	14	NbD017112.1;NbD013339.1	NbD017112.1;NbD013339.1	1058
19.0692	19.2012	18.7888	18.6554	18.3916	18.7007				-1	19	19	0	40	40	0	46.93	0	223.71	12747000	23	79	NbD015306.1;NbD015305.1;NbD014350.1;NbD013348.1;NbD007263.1;NbD006370.1;NbE44070398.1;NbD038573.1;NbE05067836.1;NbD029969.1;NbD020504.1;NbE03059078.1;NbD044148.1;NbD025859.1	NbD015306.1;NbD015305.1;NbD014350.1;NbD013348.1;NbD007263.1;NbD006370.1	1059
NaN	NaN	NaN	NaN	NaN	NaN				-1	15	1	1	40.7	3.6	3.6	42.309	0.0010642	7.6243	777790	25	5	NbD013350.1	NbD013350.1	1060
NaN	NaN	NaN	NaN	NaN	NaN				-1	1	1	1	11.8	11.8	11.8	17.249	0.001199	9.504	103130	8	2	NbD017902.1;NbD024397.1;NbD019848.1;NbE03057890.1;NbD040141.1;NbD037782.1;NbD013351.1;NbE03058644.1	NbD017902.1;NbD024397.1;NbD019848.1;NbE03057890.1;NbD040141.1;NbD037782.1;NbD013351.1;NbE03058644.1	1061
16.9898	16.9317	17.6285	17.129	17.6556	17.1415				-1	7	7	7	17.2	17.2	17.2	55.484	0	76.491	2980000	31	34	NbD013359.1;NbD048109.1;NbD006627.1	NbD013359.1;NbD048109.1;NbD006627.1	1062
NaN	NaN	NaN	NaN	NaN	NaN				-1	2	2	2	9.4	9.4	9.4	30.575	0	13.365	562340	13	7	NbD013364.1;NbE44073314.1;NbD021331.1	NbD013364.1;NbE44073314.1;NbD021331.1	1063
19.4916	19.6607	19.5512	19.7963	19.7903	19.7981				-1	26	26	26	62.9	62.9	62.9	49.013	0	323.31	22352000	24	112	NbE44069573.1;NbD021332.1;NbD013365.1;NbD006622.1;NbD011800.1;NbE03060395.1;NbE05064852.1;NbD005629.1	NbE44069573.1;NbD021332.1;NbD013365.1;NbD006622.1;NbD011800.1;NbE03060395.1;NbE05064852.1	1064
NaN	NaN	NaN	NaN	NaN	NaN				-1	1	1	1	2.5	2.5	2.5	93.75	0.0012371	10.985	39361	39	3	NbE05066587.1;NbE05064853.1;NbD021334.1;NbD013368.1	NbE05066587.1;NbE05064853.1;NbD021334.1;NbD013368.1	1065
NaN	14.6916	15.9586	NaN	NaN	NaN				-1	32	3	3	21.9	1.9	1.9	161.54	0	52.736	360360	65	7	NbD013387.1;NbD035271.1	NbD013387.1	1066
20.1754	18.0703	20.2497	17.9744	20.2855	17.79				-1	50	50	13	25.4	25.4	9.4	162.04	0	323.31	35862000	63	197	NbE03059085.1;NbD013388.1;NbD025965.1;NbE05063796.1	NbE03059085.1;NbD013388.1	1067
17.8515	17.4581	17.5203	17.1868	17.292	17.2573				-1	7	7	7	15.8	15.8	15.8	51.036	0	68.555	2618500	21	28	NbD013463.1;NbE03054310.1;NbD009048.1	NbD013463.1;NbE03054310.1;NbD009048.1	1068
NaN	NaN	NaN	NaN	NaN	NaN				-1	2	2	1	9.1	9.1	6.3	28.716	0.00082645	11.038	61669	11	2	NbD013482.1;NbE03057857.1;NbD003158.1;NbD020173.1	NbD013482.1;NbE03057857.1;NbD003158.1;NbD020173.1	1069
17.1411	16.9029	17.0162	16.7731	16.6956	16.4501				-1	6	6	6	10.7	10.7	10.7	97.918	0	50.12	1700600	46	20	NbD013513.1;NbE03055932.1;NbD053068.1;NbD000974.1	NbD013513.1;NbE03055932.1;NbD053068.1;NbD000974.1	1070
NaN	NaN	NaN	NaN	NaN	NaN				-1	1	1	1	1.7	1.7	1.7	89.334	0.0011891	9.1744	183180	36	6	NbE05063890.1;NbD023664.1;NbE44070482.1;NbD013518.1	NbE05063890.1;NbD023664.1;NbE44070482.1;NbD013518.1	1071
NaN	16.4175	16.0777	NaN	NaN	16.0753				-1	2	2	2	4.7	4.7	4.7	64.91	0	18.81	614840	30	9	NbE03059799.1;NbD025460.1;NbE44073179.1;NbD013545.1	NbE03059799.1;NbD025460.1;NbE44073179.1;NbD013545.1	1072
17.8895	NaN	NaN	NaN	NaN	18.0952				-1	2	2	2	6.6	6.6	6.6	55.254	0	23.409	1308600	26	10	NbD025461.1;NbD013547.1	NbD025461.1;NbD013547.1	1073
16.2877	15.9988	16.0799	15.6589	15.9448	15.8283				-1	3	3	1	8.5	8.5	3.7	65.07	0	27.219	716820	27	14	NbE03056402.1;NbD013555.1	NbE03056402.1;NbD013555.1	1074
NaN	NaN	NaN	NaN	NaN	NaN				-1	2	2	1	9	9	5.3	35.222	0	11.609	510010	12	4	NbD013559.1;NbD024723.1	NbD013559.1;NbD024723.1	1075
16.5343	15.8267	16.4562	15.9152	16.0888	15.8642				-1	5	3	3	17.5	11.3	11.3	46.525	0	32.475	1074100	21	17	NbD013583.1;NbD028497.1;NbD022087.1;NbD002418.1	NbD013583.1;NbD028497.1;NbD022087.1;NbD002418.1	1076
NaN	NaN	NaN	NaN	NaN	NaN				-1	1	1	1	3.7	3.7	3.7	45.194	0.00083333	11.267	149780	28	5	NbD013590.1;NbE03061790.1	NbD013590.1;NbE03061790.1	1077
NaN	NaN	NaN	NaN	NaN	NaN				-1	2	2	2	4.6	4.6	4.6	76.475	0	13.059	104480	39	3	NbD013612.1;NbD015761.1	NbD013612.1;NbD015761.1	1078
NaN	17.2372	NaN	16.7082	NaN	NaN				-1	2	2	2	2.7	2.7	2.7	104.99	0	14.265	548310	52	5	NbD013630.1;NbE44073615.1;NbE05066454.1;NbD030246.1;NbD007069.1	NbD013630.1;NbE44073615.1;NbE05066454.1;NbD030246.1;NbD007069.1	1079
NaN	NaN	NaN	NaN	NaN	NaN				-1	1	1	1	6.6	6.6	6.6	27.64	0.0019188	6.7053	47508	16	1	NbD013650.1;NbD042302.1;NbE03060699.1	NbD013650.1;NbD042302.1;NbE03060699.1	1080
20.8761	19.7511	20.4774	19.4255	20.4017	19.5158				-1	6	6	5	22.4	22.4	17.2	30.109	0	59.185	11347000	8	23	NbD013687.1;NbD023125.1	NbD013687.1;NbD023125.1	1081
NaN	NaN	NaN	NaN	NaN	NaN				-1	4	1	1	7.7	2.6	2.6	94.462	0.004881	6.3454	70674	40	2	NbD013711.1	NbD013711.1	1082
NaN	NaN	NaN	NaN	NaN	NaN				-1	2	2	2	3.4	3.4	3.4	95.024	0.00083507	11.299	180030	36	3	NbD013812.1	NbD013812.1	1083
22.3198	22.2799	22.2054	22.1292	22.0189	22.0214				-1	44	44	8	45.6	45.6	6.8	93.956	0	323.31	150830000	43	325	NbE05068830.1;NbD013853.1;NbE44073635.1;NbD014347.1;NbE05067878.1	NbE05068830.1;NbD013853.1;NbE44073635.1;NbD014347.1	1084
16.8509	17.1927	16.913	16.9808	16.812	17.2148				-1	8	8	5	23.4	23.4	12.7	45.918	0	73.046	3080800	25	41	NbD013858.1	NbD013858.1	1085
NaN	NaN	NaN	15.899	16.0893	15.8641				-1	2	2	1	5.3	5.3	2.9	52.406	0	35.885	466530	27	9	NbD029664.1;NbD013865.1	NbD029664.1;NbD013865.1	1086
16.933	NaN	17.2153	NaN	17.2072	NaN				-1	9	8	8	26	23.3	23.3	51.22	0	62.055	1083400	25	16	NbD013867.1	NbD013867.1	1087
NaN	NaN	NaN	NaN	NaN	NaN				-1	2	2	2	2.9	2.9	2.9	48.785	0.00083195	11.217	185750	16	5	NbD013871.1	NbD013871.1	1088
NaN	NaN	NaN	NaN	NaN	NaN				-1	1	1	1	3.2	3.2	3.2	44.493	0.0038023	6.6018	130680	19	2	NbD014431.1;NbE03055618.1;NbD013903.1	NbD014431.1;NbE03055618.1;NbD013903.1	1089
NaN	NaN	NaN	NaN	NaN	NaN				-1	3	3	3	13	13	13	44.015	0	17.253	373820	22	7	NbD033191.1;NbE05065587.1;NbE03058861.1;NbD013919.1	NbD033191.1;NbE05065587.1;NbE03058861.1;NbD013919.1	1090
NaN	NaN	NaN	NaN	NaN	NaN				-1	1	1	1	6.2	6.2	6.2	19.414	0.0080142	6.1698	34964	5	1	NbD013921.1;NbD043912.1;NbD020871.1	NbD013921.1;NbD043912.1;NbD020871.1	1091
NaN	NaN	NaN	NaN	NaN	NaN				-1	2	2	2	3.4	3.4	3.4	113.94	0	19.592	365440	52	5	NbE03059919.1;NbD024358.1;NbD013933.1	NbE03059919.1;NbD024358.1;NbD013933.1	1092
NaN	NaN	NaN	16.2253	16.3996	NaN				-1	2	2	2	7.2	7.2	7.2	28.072	0	12.104	366630	8	5	NbD024360.1;NbD013935.1;NbD013934.1	NbD024360.1;NbD013935.1;NbD013934.1	1093
18.9374	18.804	18.8609	19.1395	19.1921	19.0997				-1	8	8	8	23.6	23.6	23.6	40.095	0	125.67	8026600	20	39	NbD047959.1;NbD013954.1	NbD047959.1;NbD013954.1	1094
NaN	NaN	NaN	NaN	NaN	NaN				-1	2	2	2	11.4	11.4	11.4	37.577	0	13.246	167950	23	4	NbE03058570.1;NbD013962.1	NbE03058570.1;NbD013962.1	1095
NaN	NaN	NaN	NaN	NaN	NaN				-1	3	3	3	8.8	8.8	8.8	60.457	0	26.338	253810	38	7	NbD013967.1;NbD052931.1	NbD013967.1;NbD052931.1	1096
17.0647	16.7681	17.2554	16.9867	17.3653	16.8148				-1	4	4	4	15.1	15.1	15.1	50.105	0	59.125	2112800	27	24	NbE03061583.1;NbD013978.1	NbE03061583.1;NbD013978.1	1097
15.3554	15.0236	NaN	NaN	NaN	NaN				-1	3	3	3	22.4	22.4	22.4	18.338	0	19.883	217030	7	10	NbD031832.1;NbD013985.1	NbD031832.1;NbD013985.1	1098
NaN	15.3343	NaN	15.2029	NaN	NaN				-1	5	5	5	7.4	7.4	7.4	109.57	0	32.173	285470	51	9	NbE03057144.1;NbD029137.1;NbD013999.1	NbE03057144.1;NbD029137.1;NbD013999.1	1099
NaN	16.2424	16.4776	16.0608	16.3028	NaN				-1	2	2	2	6.6	6.6	6.6	39.829	0	14.653	677850	21	10	NbD014010.1;NbD029312.1	NbD014010.1;NbD029312.1	1100
NaN	16.1733	16.2548	16.2613	16.2293	16.1204				-1	12	5	5	18.7	8.3	8.3	109.32	0	82.237	812430	58	15	NbD014013.1	NbD014013.1	1101
NaN	NaN	NaN	NaN	NaN	NaN				-1	5	5	1	26.6	26.6	5.2	28.55	0	39.957	1014400	14	10	NbD014026.1	NbD014026.1	1102
16.0088	15.93	16.0896	NaN	NaN	NaN				-1	2	2	2	3.9	3.9	3.9	62.776	0	13.438	430640	27	9	NbD014033.1;NbD049222.1;NbE05065080.1;NbD003710.1	NbD014033.1;NbD049222.1;NbE05065080.1;NbD003710.1	1103
NaN	NaN	NaN	NaN	NaN	NaN				-1	2	2	1	6.2	6.2	2.5	55.419	0	16.543	176380	24	4	NbD014053.1	NbD014053.1	1104
NaN	17.525	16.7089	17.2435	16.9084	16.9027				-1	16	5	0	23.3	8.1	0	84.614	0	45.255	1466100	41	17	NbD014066.1;NbE03059520.1;NbD025161.1	NbD014066.1;NbE03059520.1;NbD025161.1	1105
NaN	NaN	NaN	NaN	NaN	NaN				-1	1	1	1	1.6	1.6	1.6	112.49	0.0016303	6.8479	24771	50	2	NbD014078.1;NbE44070875.1;NbE05068372.1;NbD041644.1	NbD014078.1;NbE44070875.1;NbE05068372.1;NbD041644.1	1106
16.278	16.3082	16.379	15.9944	15.8406	15.8127				-1	10	2	0	36.2	6.6	0	26.171	0	14.771	736500	12	16	NbD014102.1	NbD014102.1	1107
17.8712	18.3835	17.7801	18.3783	17.9091	18.3628				-1	16	16	3	26.7	26.7	7.4	81.334	0	256	9878300	42	74	NbD014128.1	NbD014128.1	1108
NaN	NaN	NaN	NaN	NaN	NaN				-1	1	1	1	22.1	22.1	22.1	9.623	0.001616	6.7956	119790	3	3	NbD014134.1	NbD014134.1	1110
NaN	NaN	NaN	NaN	NaN	NaN				-1	2	2	2	16	16	16	23.126	0	11.739	296850	14	4	NbD014144.1;NbD014393.1	NbD014144.1;NbD014393.1	1111
15.9612	NaN	15.7517	15.8733	15.8816	16.0909				-1	3	3	3	11	11	11	32.295	0	25.982	717430	17	17	NbD014174.1;NbD000725.1	NbD014174.1	1112
17.2234	NaN	17.7111	17.5578	17.5991	17.4286				-1	2	2	2	20.8	20.8	20.8	16.074	0	22.321	1329300	9	11	NbD014182.1;NbD043612.1	NbD014182.1;NbD043612.1	1113
18.1632	17.9957	18.3538	17.6777	18.3489	17.5166				-1	2	2	2	20.9	20.9	20.9	17.266	0	27.001	2744800	7	15	NbD014184.1;NbD005741.1	NbD014184.1;NbD005741.1	1114
14.3714	16.044	14.897	16.0698	14.849	15.8898				-1	3	3	3	6	6	6	67.017	0	48.101	575560	39	16	NbD014194.1;NbE05065491.1;NbD037087.1;NbE44069054.1	NbD014194.1;NbE05065491.1	1115
17.9074	17.8506	NaN	17.4131	NaN	NaN				-1	3	3	3	7.2	7.2	7.2	74.628	0	21.957	792630	33	9	NbD043579.1;NbD014199.1	NbD043579.1;NbD014199.1	1116
NaN	NaN	NaN	NaN	NaN	NaN				-1	1	1	1	3.3	3.3	3.3	74.174	0.0012175	10.2	217040	31	4	NbD043587.1;NbE05064438.1;NbD014207.1	NbD043587.1;NbE05064438.1;NbD014207.1	1117
NaN	NaN	NaN	NaN	NaN	NaN				-1	3	2	2	3.2	2.3	2.3	217.66	0	12.893	61952	94	4	NbD021035.1;NbE05065670.1;NbD014214.1	NbD021035.1;NbE05065670.1;NbD014214.1	1118
17.6266	17.3362	17.9922	17.0435	17.722	17.041				-1	6	6	6	15.3	15.3	15.3	33.642	0	51.414	2563900	17	25	NbD021042.1;NbD014218.1	NbD021042.1;NbD014218.1	1119
17.5246	17.1778	17.5492	16.9733	17.638	16.9667				-1	3	3	3	7.8	7.8	7.8	60.817	0	47.751	1775200	27	21	NbD014225.1;NbD029649.1	NbD014225.1	1120
19.5864	20.3102	19.5323	19.9977	19.3236	19.9872				-1	17	17	1	37.6	37.6	6.9	46.643	0	323.31	31124000	19	104	NbD014257.1	NbD014257.1	1121
NaN	NaN	NaN	NaN	NaN	NaN				-1	1	1	1	19.3	19.3	19.3	9.5908	0.0046225	6.3979	6269.6	5	1	NbD022582.1;NbD014272.1	NbD022582.1;NbD014272.1	1122
NaN	NaN	NaN	NaN	NaN	NaN				-1	2	2	2	9.5	9.5	9.5	28.328	0	13.072	136820	15	3	NbD014278.1	NbD014278.1	1123
NaN	NaN	NaN	NaN	NaN	NaN				-1	2	1	1	15.1	8.6	8.6	15.951	0.0099678	6.0909	32793	6	1	NbD052166.1;NbD014281.1	NbD052166.1;NbD014281.1	1124
17.1859	17.1812	17.2907	NaN	NaN	NaN				-1	4	4	4	15.3	15.3	15.3	31.834	0	33.65	931970	15	10	NbE03054714.1;NbD050966.1;NbD014316.1	NbE03054714.1;NbD050966.1;NbD014316.1	1125
19.7681	18.3379	18.6149	18.9528	18.6397	18.6011				-1	11	5	5	53.5	29.7	29.7	18.044	0	40.78	5227900	10	24	NbD014322.1	NbD014322.1	1126
NaN	NaN	NaN	NaN	NaN	NaN				-1	4	1	1	16.4	5.8	5.8	44.746	0.0017065	7.2491	65138	22	1	NbE03054018.1;NbD014326.1	NbE03054018.1;NbD014326.1	1127
18.8273	NaN	18.5189	NaN	18.5018	NaN				-1	6	6	6	19.2	19.2	19.2	36.836	0	51.878	1903000	18	14	NbD014333.1;NbD019850.1	NbD014333.1	1128
18.31	17.6215	18.129	NaN	17.8602	NaN				-1	6	5	5	45.2	45.2	45.2	17.404	0	59.178	1749200	11	15	NbE44069955.1;NbD014335.1;NbE03054587.1;NbD028293.1	NbE44069955.1;NbD014335.1;NbE03054587.1	1129
NaN	NaN	NaN	NaN	NaN	NaN				-1	2	2	0	16.2	16.2	0	22.701	0.0011971	9.4618	34963	8	1	NbD019539.1;NbD014344.1	NbD019539.1;NbD014344.1	1130
NaN	NaN	NaN	NaN	NaN	NaN				-1	1	1	1	7.5	7.5	7.5	23.233	0.0011547	8.5128	197180	10	3	NbD015309.1;NbD014349.1	NbD015309.1;NbD014349.1	1131
17.2438	NaN	16.9416	NaN	17.0374	NaN				-1	3	3	3	6.4	6.4	6.4	106.14	0	27.165	732520	41	11	NbE05066089.1;NbD014354.1;NbE44073155.1	NbE05066089.1;NbD014354.1	1132
NaN	NaN	NaN	NaN	NaN	NaN				-1	2	2	2	4.4	4.4	4.4	34.157	0	17.142	380320	18	7	NbD028667.1;NbD014369.1	NbD028667.1;NbD014369.1	1133
18.7231	18.6642	18.7165	18.6879	18.8619	18.6326				-1	4	4	4	29.1	29.1	29.1	18.051	0	33.451	6805100	10	30	NbD028670.1;NbD014371.1	NbD028670.1;NbD014371.1	1134
18.6757	17.9416	18.4669	NaN	18.5143	17.977				-1	2	2	2	13.4	13.4	13.4	18.956	0	36.109	2814300	11	12	NbD026860.1;NbD014434.1	NbD026860.1;NbD014434.1	1135
NaN	NaN	NaN	NaN	NaN	NaN				-1	8	2	2	19.5	5.8	5.8	70.173	0	23.821	519050	35	8	NbD014505.1;NbE05063706.1	NbD014505.1;NbE05063706.1	1136
NaN	NaN	NaN	NaN	NaN	NaN				-1	14	2	1	27	6.4	2.7	75.858	0	21.63	261150	41	3	NbD014565.1	NbD014565.1	1137
NaN	NaN	NaN	NaN	NaN	NaN				-1	1	1	1	2.4	2.4	2.4	81.815	0.0080119	6.1675	38754	41	1	NbE05062855.1;NbD017388.1;NbD014598.1	NbE05062855.1;NbD017388.1;NbD014598.1	1139
NaN	NaN	NaN	NaN	NaN	NaN				-1	3	3	3	6.1	6.1	6.1	67.529	0	17.921	705230	34	7	NbD014613.1;NbE44073349.1;NbE03055159.1;NbD049697.1	NbD014613.1;NbE44073349.1;NbE03055159.1;NbD049697.1	1140
16.1123	15.6295	16.0359	15.4013	NaN	15.388				-1	2	2	2	9	9	9	51.97	0	28.015	491880	25	11	NbE05068248.1;NbE03055681.1;NbD014619.1	NbE05068248.1;NbE03055681.1;NbD014619.1	1141
NaN	NaN	NaN	NaN	NaN	NaN				-1	1	1	1	4.4	4.4	4.4	48.37	0	54.242	474720	20	5	NbD014636.1	NbD014636.1	1142
19.0149	18.9138	18.9407	18.9952	18.943	18.8523				-1	22	22	1	33.6	33.6	3.8	88.059	0	270.28	22619000	41	128	NbD014644.1;NbD011401.1	NbD014644.1	1143
NaN	NaN	NaN	NaN	NaN	NaN				-1	1	1	1	6.1	6.1	6.1	26.529	0.0010753	7.6711	120550	15	4	NbD014654.1	NbD014654.1	1144
NaN	NaN	NaN	NaN	NaN	NaN				-1	5	5	5	5.5	5.5	5.5	138.69	0	31.548	419950	65	9	NbE03055237.1;NbD014657.1;NbE05067419.1;NbE03060036.1;NbD028130.1;NbD041050.1	NbE03055237.1;NbD014657.1	1145
NaN	NaN	NaN	NaN	NaN	NaN				-1	2	2	1	3.6	3.6	2.3	85.912	0	12.405	66677	39	3	NbD014717.1	NbD014717.1	1146
NaN	NaN	NaN	NaN	NaN	NaN				-1	3	3	3	11.5	11.5	11.5	43.79	0	17.571	231760	18	4	NbE03054900.1;NbD036112.1;NbD014791.1;NbD018975.1;NbE03060502.1;NbD033972.1	NbE03054900.1;NbD036112.1;NbD014791.1	1147
NaN	NaN	NaN	NaN	NaN	NaN				-1	2	2	2	17.4	17.4	17.4	16.667	0	13.427	620950	9	6	NbD014802.1;NbD026497.1	NbD014802.1;NbD026497.1	1148
17.6483	18.5852	17.9523	18.7424	17.9466	18.8697				-1	9	9	9	45.9	45.9	45.9	35.919	0	122.03	4178600	21	30	NbD014817.1;NbD023842.1	NbD014817.1;NbD023842.1	1149
NaN	NaN	NaN	NaN	NaN	NaN				-1	2	2	1	3.4	3.4	1.9	65.502	0.001226	10.542	67027	26	2	NbD014819.1	NbD014819.1	1150
NaN	NaN	NaN	NaN	NaN	NaN				-1	1	1	1	2.7	2.7	2.7	73.059	0.0017434	7.4853	120570	39	2	NbE03061317.1;NbD014841.1	NbE03061317.1;NbD014841.1	1151
NaN	NaN	NaN	NaN	NaN	NaN				-1	2	2	2	12.1	12.1	12.1	21.365	0	11.755	509370	8	4	NbD014862.1	NbD014862.1	1152
NaN	NaN	NaN	NaN	NaN	NaN				-1	1	1	1	5.3	5.3	5.3	20.824	0.0074738	6.2116	128900	11	3	NbE03060618.1;NbD014877.1	NbE03060618.1;NbD014877.1	1153
NaN	16.6851	16.7673	16.5704	NaN	16.4568				-1	3	3	1	49.5	49.5	20	10.791	0	22.626	899200	6	13	NbD014885.1;NbD007622.1;NbD001738.1;NbD034176.1;NbD042565.1;NbD000258.1;NbD022762.1;NbD008314.1	NbD014885.1;NbD007622.1;NbD001738.1;NbD034176.1	1154
NaN	NaN	NaN	NaN	NaN	NaN				-1	7	1	1	25.9	11.2	11.2	23.028	0.0012141	10.107	102180	11	1	NbD014898.1;NbD031467.1;NbD024794.1;NbD000097.1	NbD014898.1;NbD031467.1;NbD024794.1	1155
NaN	NaN	NaN	NaN	NaN	NaN				-1	1	1	1	4.5	4.5	4.5	36.792	0	29.446	222440	18	6	NbE05066868.1;NbD031740.1;NbD014901.1	NbE05066868.1;NbD031740.1;NbD014901.1	1156
17.3221	17.1261	17.1454	NaN	17.0314	16.2207				-1	8	8	2	23.3	23.3	7.4	45.026	0	50.766	1641900	25	22	NbD014907.1;NbD030052.1	NbD014907.1	1157
NaN	NaN	NaN	NaN	NaN	NaN				-1	6	6	6	13.2	13.2	13.2	58.808	0	34.473	717430	20	9	NbD014928.1;NbE05062856.1;NbD033143.1	NbD014928.1;NbE05062856.1	1158
18.3327	18.4913	18.8069	18.9317	19.1258	18.8892				-1	8	8	7	29.3	29.3	29.3	19.001	0	231.48	9877300	10	52	NbD014996.1;NbE05067080.1;NbE44071340.1	NbD014996.1;NbE05067080.1;NbE44071340.1	1159
NaN	NaN	NaN	NaN	NaN	NaN				-1	1	1	1	6.7	6.7	6.7	32.022	0.0096831	6.0963	2665800	17	1	NbD016491.1;NbD015012.1	NbD016491.1;NbD015012.1	1160
NaN	NaN	NaN	NaN	NaN	NaN				-1	1	1	1	2.2	2.2	2.2	46.484	0.0096859	6.0992	31576	26	1	NbD050136.1;NbD015024.1	NbD050136.1;NbD015024.1	1161
NaN	16.9167	NaN	NaN	16.8189	16.2479				-1	3	3	3	11.6	11.6	11.6	55.493	0	22.824	486710	24	10	NbD015041.1	NbD015041.1	1162
NaN	NaN	NaN	NaN	NaN	NaN				-1	1	1	1	3.6	3.6	3.6	58.672	0.0010811	7.6981	30144	23	2	NbD015043.1	NbD015043.1	1163
NaN	NaN	NaN	NaN	NaN	NaN				-1	1	1	1	5.7	5.7	5.7	51.191	0.0043956	6.5289	343060	22	5	NbD015056.1	NbD015056.1	1164
NaN	NaN	NaN	NaN	NaN	NaN				-1	2	2	2	6.9	6.9	6.9	47.853	0	11.588	74654	28	3	NbE03059990.1;NbD015063.1	NbE03059990.1;NbD015063.1	1165
NaN	15.95	NaN	NaN	15.7294	NaN				-1	3	2	2	7.3	5	5	81.088	0	13.642	270310	39	7	NbD015067.1;NbD044640.1	NbD015067.1;NbD044640.1	1166
NaN	NaN	NaN	NaN	NaN	NaN				-1	1	1	1	5.3	5.3	5.3	26.113	0.001688	7.1522	180350	11	3	NbE03055455.1;NbD015071.1	NbE03055455.1;NbD015071.1	1167
17.248	16.7512	17.0923	16.7374	16.9246	16.9463				-1	5	5	5	16.5	16.5	16.5	43.013	0	72.248	1757600	17	21	NbD015073.1;NbD022167.1	NbD015073.1;NbD022167.1	1168
18.1099	18.3005	18.2572	18.3638	18.4684	18.3223				-1	8	8	5	22.8	22.8	12.1	40.881	0	94.525	6199800	20	42	NbD015087.1;NbE05068498.1;NbD004456.1;NbE44073220.1;NbE03060273.1;NbD051481.1;NbD050804.1;NbD040146.1;NbD050371.1;NbE03061087.1;NbD033757.1;NbD008791.1;NbD046067.1;NbE03057748.1;NbD026165.1;NbD016162.1;NbE03053756.1	NbD015087.1;NbE05068498.1;NbD004456.1	1169
19.8317	18.0122	19.6233	17.7711	19.0717	17.7566				-1	7	7	7	28.8	28.8	28.8	41.772	0	141.15	6320900	17	35	NbD015090.1	NbD015090.1	1170
NaN	NaN	NaN	NaN	NaN	NaN				-1	1	1	1	4.8	4.8	4.8	34.027	0	16.282	233380	16	5	NbD015105.1;NbE05067773.1	NbD015105.1;NbE05067773.1	1171
16.4403	16.3944	16.5457	NaN	NaN	NaN				-1	6	6	5	13.4	13.4	10.4	46.614	0	41.03	647420	23	11	NbD015114.1;NbE03055645.1;NbD008840.1;NbD006872.1	NbD015114.1;NbE03055645.1;NbD008840.1	1172
NaN	NaN	NaN	NaN	NaN	NaN				-1	1	1	1	6.2	6.2	6.2	25.954	0	11.687	211340	14	6	NbD015124.1;NbE05066018.1;NbD030583.1;NbD046387.1;NbE03059453.1	NbD015124.1;NbE05066018.1;NbD030583.1;NbD046387.1;NbE03059453.1	1173
16.189	NaN	16.0312	15.9973	NaN	NaN				-1	7	2	0	4.5	1.5	0	252.67	0	17.336	410850	121	9	NbD015131.1	NbD015131.1	1174
NaN	NaN	NaN	NaN	NaN	NaN				-1	1	1	1	2.3	2.3	2.3	54.34	0.0016667	7.0512	137600	19	3	NbD015145.1	NbD015145.1	1175
18.702	19.192	18.5996	19.4855	18.5686	19.3596				-1	7	6	5	40.8	35.3	27.8	28.797	0	74.256	7202400	15	49	NbD045776.1;NbD015146.1	NbD045776.1;NbD015146.1	1176
NaN	NaN	NaN	NaN	NaN	NaN				-1	4	4	2	24.7	24.7	12.3	25.664	0	21.777	859920	15	4	NbD015151.1;NbE44069613.1	NbD015151.1;NbE44069613.1	1177
NaN	NaN	NaN	NaN	NaN	NaN				-1	1	1	1	4.4	4.4	4.4	29.384	0.0016458	6.9207	42919	13	2	NbD050956.1;NbD043812.1;NbD028441.1;NbD023985.1;NbD030631.1;NbD015156.1	NbD050956.1;NbD043812.1;NbD028441.1;NbD023985.1;NbD030631.1;NbD015156.1	1178
NaN	NaN	NaN	NaN	NaN	NaN				-1	1	1	1	2.6	2.6	2.6	72.76	0.0016265	6.8322	12615	31	2	NbD015197.1	NbD015197.1	1179
18.9401	18.4302	18.446	18.1747	18.68	18.2433				-1	7	7	5	26.7	26.7	18	48.646	0	117.88	3360200	20	26	NbE03055740.1;NbD015255.1	NbE03055740.1;NbD015255.1	1180
21.1083	20.5996	21.0422	19.7624	20.4822	19.7479				-1	9	6	0	51.4	31.5	0	20.27	0	188.23	21571000	10	48	NbD015261.1;NbD015262.1;NbE44074020.1	NbD015261.1;NbD015262.1	1181
NaN	NaN	NaN	NaN	NaN	NaN				-1	5	2	2	47.9	15.8	15.8	16.707	0	12.164	164110	9	5	NbD015269.1;NbD042016.1;NbD008429.1;NbE03059817.1;NbD052852.1	NbD015269.1	1182
17.0628	18.51	17.3205	18.3446	NaN	18.3801				-1	7	5	5	35.3	25.1	25.1	24.043	0	40.493	2373100	15	15	NbD015278.1;NbD001543.1	NbD015278.1;NbD001543.1	1183
17.7236	18.2527	17.6745	18.1078	18.0742	18.3611				-1	40	4	4	43.5	4.6	4.6	94.431	0	49.663	4677500	43	34	NbD015310.1	NbD015310.1	1184
19.0752	18.1979	18.2956	17.8922	17.9632	17.506				-1	30	4	4	47.9	12.2	12.2	73.02	0	100.78	3945000	37	25	NbD015337.1;NbD015335.1;NbD000027.1	NbD015337.1;NbD015335.1	1185
16.4955	NaN	NaN	NaN	15.5152	NaN				-1	2	2	2	5.3	5.3	5.3	92.354	0	96.669	291640	44	7	NbE03057186.1;NbD015366.1	NbE03057186.1;NbD015366.1	1186
22.3682	22.0295	22.2567	21.837	21.9823	21.7965				-1	18	18	3	54.3	54.3	19.6	37.613	0	323.31	89701000	19	118	NbD015375.1	NbD015375.1	1187
NaN	15.5662	NaN	NaN	16.1425	15.7915				-1	6	6	2	12.5	12.5	4.4	76.619	0	41.604	741510	40	13	NbD015401.1;NbE05067686.1;NbE44071000.1	NbD015401.1;NbE05067686.1;NbE44071000.1	1188
NaN	NaN	NaN	NaN	NaN	NaN				-1	2	1	1	10.3	4.6	4.6	30.113	0.001641	6.9009	35580	15	1	NbD015421.1;NbE44071685.1;NbE03055758.1;NbD036976.1	NbD015421.1;NbE44071685.1;NbE03055758.1;NbD036976.1	1189
NaN	NaN	NaN	NaN	NaN	NaN				-1	1	1	1	1.9	1.9	1.9	130.12	0	38.943	685560	50	6	NbD015423.1	NbD015423.1	1190
NaN	NaN	NaN	NaN	NaN	NaN				-1	1	1	1	4.8	4.8	4.8	44.736	0.0012351	10.937	233260	19	4	NbD015437.1	NbD015437.1	1192
21.8613	22.5164	21.8793	22.29	21.9067	22.303				-1	19	19	7	46.9	46.9	10.9	37.302	0	323.31	129860000	17	175	NbD015455.1	NbD015455.1	1193
NaN	16.5906	15.3031	16.1792	15.8187	17.5161				-1	6	6	6	18.9	18.9	18.9	58.222	0	49.518	1196600	28	23	NbD015467.1;NbE05065337.1;NbD028460.1	NbD015467.1;NbE05065337.1;NbD028460.1	1194
NaN	NaN	NaN	NaN	NaN	NaN				-1	2	2	2	3.1	3.1	3.1	120.15	0	16.517	189290	52	6	NbD015484.1;NbE05065083.1;NbD042244.1	NbD015484.1;NbE05065083.1;NbD042244.1	1195
NaN	NaN	NaN	NaN	NaN	NaN				-1	5	5	5	27	27	27	27.033	0	66.455	562780	13	9	NbD038735.1;NbD038654.1;NbD015488.1	NbD038735.1;NbD038654.1;NbD015488.1	1196
NaN	NaN	NaN	NaN	NaN	NaN				-1	5	4	4	13.2	10.6	10.6	61.309	0	28.663	327560	31	6	NbD015491.1	NbD015491.1	1197
18.4538	18.4709	18.2226	18.5013	18.2389	18.4959				-1	30	30	7	36.5	36.5	8.9	107.79	0	318.72	11219000	57	109	NbD015511.1;NbD040020.1	NbD015511.1	1198
18.5031	18.591	18.6535	19.2638	19.5938	19.4279				-1	6	6	4	27.7	27.7	15.3	36.786	0	69.044	7280400	23	27	NbD015518.1;NbD033721.1;NbE05068538.1;NbE05067353.1	NbD015518.1;NbD033721.1;NbE05068538.1;NbE05067353.1	1199
NaN	NaN	NaN	NaN	NaN	NaN				-1	2	2	1	5.4	5.4	2.5	67.28	0.0012043	9.6511	30233	25	1	NbD031710.1;NbE05063662.1;NbE44069498.1;NbD015529.1;NbE44070643.1	NbD031710.1;NbE05063662.1;NbE44069498.1;NbD015529.1;NbE44070643.1	1200
17.4667	17.0802	17.391	17.2401	17.422	17.0586				-1	26	6	6	36.3	13.1	13.1	73.365	0	150.44	2757000	31	25	NbD015548.1	NbD015548.1	1201
NaN	NaN	NaN	NaN	NaN	NaN				-1	18	1	1	33.4	4.4	4.4	46.752	0.0010707	7.6588	19699	23	1	NbE03058193.1;NbD015554.1;NbE05064865.1	NbE03058193.1;NbD015554.1;NbE05064865.1	1202
NaN	NaN	NaN	16.3662	NaN	16.4649				-1	5	5	3	20	20	6.1	41.21	0	32.184	438880	14	10	NbD015558.1	NbD015558.1	1203
NaN	15.7746	NaN	15.9024	NaN	15.7144				-1	4	4	4	5.9	5.9	5.9	92.474	0	27.915	507450	47	12	NbE03059398.1;NbD015589.1;NbE03056530.1;NbD036129.1	NbE03059398.1;NbD015589.1;NbE03056530.1;NbD036129.1	1204
17.0455	16.5826	NaN	NaN	NaN	NaN				-1	3	3	3	9.9	9.9	9.9	44.207	0	25.313	1159200	17	12	NbD015590.1;NbD036126.1;NbE03060052.1	NbD015590.1;NbD036126.1;NbE03060052.1	1205
NaN	16.259	NaN	15.8147	NaN	NaN				-1	3	3	3	5.2	5.2	5.2	55.376	0	25.736	454840	19	9	NbE44070156.1;NbE03057614.1;NbE05065793.1;NbD025322.1;NbE05063594.1;NbD015593.1;NbE03058680.1;NbD005338.1;NbD005289.1;NbD005851.1	NbE44070156.1;NbE03057614.1;NbE05065793.1;NbD025322.1;NbE05063594.1;NbD015593.1;NbE03058680.1;NbD005338.1;NbD005289.1	1206
NaN	NaN	NaN	NaN	NaN	NaN				-1	2	1	1	19.1	8.5	8.5	15.863	0	13.083	99640	6	5	NbD015597.1	NbD015597.1	1207
NaN	NaN	NaN	NaN	NaN	NaN				-1	1	1	1	1.7	1.7	1.7	113.73	0.0016308	6.8491	176760	55	5	NbE44071992.1;NbD015598.1	NbE44071992.1;NbD015598.1	1208
NaN	NaN	NaN	NaN	NaN	NaN				-1	4	2	2	12.1	6.6	6.6	33.896	0	13.393	524230	16	7	NbD015625.1;NbD020650.1;NbD004595.1;NbD040857.1	NbD015625.1;NbD020650.1;NbD004595.1	1209
NaN	NaN	NaN	NaN	NaN	NaN				-1	3	3	3	62.5	62.5	62.5	11.397	0	25.408	368780	6	8	NbD015632.1;NbD038972.1;NbD037291.1	NbD015632.1;NbD038972.1	1210
17.1347	16.9969	17.004	17.0547	17.0184	16.9748				-1	5	5	5	23	23	23	38.08	0	36.991	1485200	17	21	NbD015663.1;NbD049428.1	NbD015663.1;NbD049428.1	1212
19.5727	19.1312	19.4797	19.2121	19.3005	19.1247				-1	9	8	3	37.2	31.8	13.4	37.707	0	144.21	10179000	19	43	NbD015710.1	NbD015710.1	1213
NaN	NaN	NaN	NaN	NaN	NaN				-1	1	1	1	5.4	5.4	5.4	20.631	0.0019231	6.7293	617780	10	6	NbE44074118.1;NbD015740.1	NbE44074118.1;NbD015740.1	1214
NaN	NaN	NaN	NaN	NaN	NaN				-1	5	2	1	16.8	5.6	5.4	50.666	0.0012058	9.6645	55883	20	2	NbD036688.1;NbD015746.1	NbD036688.1;NbD015746.1	1215
16.199	17.4693	NaN	16.9069	NaN	17.0517				-1	1	1	1	12.6	12.6	12.6	13.145	0.001124	8.0505	653780	6	8	NbD015749.1	NbD015749.1	1216
NaN	NaN	NaN	NaN	NaN	NaN				-1	5	2	2	14	6.9	6.9	72.362	0	35.339	289540	34	6	NbD015755.1	NbD015755.1	1217
NaN	NaN	NaN	NaN	NaN	NaN				-1	1	1	1	3.8	3.8	3.8	41.759	0.0010597	7.6026	28524	15	1	NbD015769.1	NbD015769.1	1218
NaN	NaN	NaN	NaN	NaN	NaN				-1	1	1	1	5.7	5.7	5.7	27.395	0.0016145	6.7875	69361	15	1	NbD015780.1	NbD015780.1	1219
NaN	14.9716	NaN	NaN	NaN	14.8321				-1	2	2	2	22.9	22.9	22.9	27.649	0	21.67	134010	18	7	NbD015783.1	NbD015783.1	1220
NaN	NaN	NaN	NaN	NaN	NaN				-1	1	1	1	4.7	4.7	4.7	36.832	0.0066126	6.26	14236	26	1	NbE05067693.1;NbD015815.1;NbD027025.1	NbE05067693.1;NbD015815.1;NbD027025.1	1221
NaN	15.1618	NaN	NaN	NaN	15.6309				-1	4	4	4	14.7	14.7	14.7	49.818	0	35.174	450790	20	10	NbD015832.1;NbE03056145.1;NbD001618.1	NbD015832.1;NbE03056145.1;NbD001618.1	1222
NaN	17.1753	NaN	17.861	16.3134	17.9004				-1	5	4	4	5.7	4.9	4.9	123.76	0	29.992	1381500	48	18	NbD015837.1;NbD001611.1	NbD015837.1;NbD001611.1	1223
NaN	NaN	NaN	NaN	NaN	NaN				-1	1	1	1	3.8	3.8	3.8	54.624	0.0010937	7.8129	131950	23	4	NbD015845.1;NbE44073531.1	NbD015845.1;NbE44073531.1	1224
NaN	16.1591	16.1402	NaN	NaN	NaN				-1	2	2	2	5.2	5.2	5.2	61.07	0	14.549	406750	32	7	NbD015921.1	NbD015921.1	1225
18.6238	18.8272	19.0528	19.6172	18.7719	19.5334				-1	7	3	3	24.4	12.8	12.8	38.141	0	46.614	3941500	16	17	NbD015928.1	NbD015928.1	1226
16.781	16.5553	NaN	16.7936	17.0143	NaN				-1	4	4	4	17.2	17.2	17.2	39.805	0	36.253	986700	19	14	NbD016012.1	NbD016012.1	1227
NaN	16.1511	NaN	NaN	NaN	17.2068				-1	10	3	3	47.2	21.3	21.3	34.572	0	71.803	679690	10	8	NbD016046.1	NbD016046.1	1228
17.9096	NaN	17.7633	NaN	17.4271	NaN				-1	2	2	2	7	7	7	31.812	0	16.366	1805100	7	9	NbE05068561.1;NbE03054120.1;NbD016059.1;NbD005628.1;NbD004837.1;NbD051702.1;NbD031249.1;NbE03057031.1	NbE05068561.1;NbE03054120.1;NbD016059.1;NbD005628.1;NbD004837.1;NbD051702.1;NbD031249.1;NbE03057031.1	1229
NaN	NaN	NaN	NaN	NaN	NaN				-1	1	1	1	3.1	3.1	3.1	50.32	0.0011236	8.0488	267940	23	6	NbD016061.1	NbD016061.1	1230
17.6834	17.1554	17.3613	17.2716	16.9741	17.1248				-1	5	5	4	24.4	24.4	24.4	28.671	0	35.786	1654900	13	17	NbD036456.1;NbD016072.1	NbD036456.1;NbD016072.1	1231
NaN	NaN	NaN	NaN	NaN	NaN				-1	2	1	1	20.8	10.1	10.1	16.932	0.0011783	9.0044	137010	9	3	NbD033746.1;NbD016097.1	NbD033746.1;NbD016097.1	1232
17.0115	17.5757	16.9444	17.2372	16.8757	17.0987				-1	7	7	2	60.6	60.6	20.2	12.197	0	55.622	1916200	7	25	NbD016121.1	NbD016121.1	1233
16.9575	NaN	16.6941	NaN	16.367	NaN				-1	1	1	1	10.8	10.8	10.8	18.012	0.0011587	8.6143	442020	9	6	NbD016124.1	NbD016124.1	1234
17.5439	17.244	17.76	17.6628	17.8173	17.8385				-1	4	4	3	18.6	18.6	18.4	41.599	0	104.89	3004300	19	23	NbE03054516.1;NbD016140.1	NbE03054516.1;NbD016140.1	1235
15.4224	NaN	15.3796	NaN	NaN	NaN				-1	3	3	3	9.3	9.3	9.3	54.035	0	44.373	367900	24	10	NbD016173.1;NbD024435.1	NbD016173.1;NbD024435.1	1236
NaN	NaN	NaN	NaN	NaN	NaN				-1	3	3	2	5.1	5.1	3.9	114.01	0	19.529	36844	43	3	NbD024438.1;NbE44073267.1;NbD016176.1	NbD024438.1;NbE44073267.1;NbD016176.1	1237
NaN	NaN	NaN	NaN	NaN	NaN				-1	13	1	1	28.1	4	4	71.739	0	11.646	135670	35	1	NbD016205.1;NbD045201.1;NbD011063.1;NbD011064.1	NbD016205.1;NbD045201.1;NbD011063.1;NbD011064.1	1238
NaN	NaN	NaN	NaN	NaN	NaN				-1	6	6	5	14.9	14.9	12.7	68.173	0	35.076	208050	22	6	NbE05066802.1;NbD018915.1;NbD016217.1;NbE03053357.1;NbE05067365.1;NbD047822.1;NbD002819.1;NbE44069894.1;NbD007704.1	NbE05066802.1;NbD018915.1;NbD016217.1;NbE03053357.1;NbE05067365.1;NbD047822.1;NbD002819.1;NbE44069894.1;NbD007704.1	1239
NaN	NaN	NaN	NaN	NaN	NaN				-1	1	1	1	11	11	11	17.209	0	23.735	352970	10	5	NbD016224.1;NbE03053345.1;NbD018903.1;NbD018902.1	NbD016224.1;NbE03053345.1;NbD018903.1;NbD018902.1	1240
NaN	NaN	NaN	NaN	NaN	NaN				-1	2	1	1	12.9	12.9	12.9	16.294	0.0046239	6.4007	230710	8	3	NbD016228.1	NbD016228.1	1241
NaN	NaN	NaN	NaN	NaN	NaN				-1	1	1	1	10.1	10.1	10.1	20.084	0.0010635	7.6227	237550	7	4	NbD029061.1;NbD016232.1	NbD029061.1;NbD016232.1	1242
17.7191	17.0357	17.9195	16.6817	17.4698	17.4682				-1	14	14	6	22.6	22.6	9.5	101.11	0	113.56	2436200	57	34	NbD016244.1;NbE44072036.1	NbD016244.1;NbE44072036.1	1243
NaN	NaN	NaN	NaN	NaN	NaN				-1	1	1	1	1.5	1.5	1.5	114.26	0.0011157	7.9792	82045	45	2	NbE05067399.1;NbE05068455.1;NbD016283.1;NbE44071765.1;NbD048654.1	NbE05067399.1;NbE05068455.1;NbD016283.1;NbE44071765.1;NbD048654.1	1244
NaN	NaN	NaN	17.1484	NaN	17.3175				-1	18	2	2	26.4	2.1	2.1	88.616	0	22.859	1112100	42	8	NbD017469.1;NbD016286.1	NbD017469.1;NbD016286.1	1245
NaN	NaN	NaN	NaN	NaN	NaN				-1	1	1	1	12.4	12.4	12.4	11.474	0.0019249	6.7317	118480	4	3	NbD053195.1;NbD016290.1	NbD053195.1;NbD016290.1	1246
18.9192	19.0311	18.757	18.7686	18.702	18.7408				-1	9	9	2	17.9	17.9	5.6	61.782	0	177.83	4777700	28	32	NbD016309.1	NbD016309.1	1247
NaN	NaN	16.0662	NaN	16.1092	NaN				-1	7	7	3	10.7	10.7	2.4	110.28	0	41.682	1164700	43	13	NbD016324.1	NbD016324.1	1248
20.3392	19.9479	20.1028	19.8737	20.053	19.7582				-1	23	23	4	46.3	46.3	8.9	44.236	0	323.31	33333000	25	153	NbD016339.1	NbD016339.1	1249
NaN	NaN	NaN	NaN	NaN	NaN				-1	1	1	1	8.1	8.1	8.1	21.348	0.0014104	7.5881	37732	6	1	NbD033343.1;NbD016340.1	NbD033343.1;NbD016340.1	1250
NaN	NaN	NaN	NaN	NaN	NaN				-1	2	2	2	17.2	17.2	17.2	16.264	0	14.28	277030	8	7	NbD034351.1;NbE44072720.1;NbD034350.1;NbD016346.1	NbD034351.1;NbE44072720.1;NbD034350.1;NbD016346.1	1251
NaN	NaN	NaN	NaN	NaN	NaN				-1	1	1	1	15.8	15.8	15.8	14.879	0.0019182	6.6977	22994	6	1	NbD033231.1;NbD016364.1	NbD033231.1;NbD016364.1	1252
NaN	NaN	NaN	NaN	NaN	NaN				-1	1	1	1	3.8	3.8	3.8	29.2	0.0016534	6.9531	245420	14	4	NbD016367.1	NbD016367.1	1253
16.6461	17.0303	16.3646	16.7055	16.1288	16.6362				-1	3	3	3	7.6	7.6	7.6	59.589	0	62.201	1138500	26	22	NbD016376.1;NbD003333.1	NbD016376.1;NbD003333.1	1254
NaN	NaN	NaN	NaN	NaN	NaN				-1	1	1	1	7.9	7.9	7.9	24.95	0.0011194	8.0122	180890	7	5	NbD016384.1;NbE03058367.1;NbD052031.1	NbD016384.1;NbE03058367.1;NbD052031.1	1255
18.5568	19.0714	18.4559	18.9686	18.4667	18.8069				-1	6	4	4	40.8	28.1	28.1	29.43	0	32.72	4195300	16	20	NbD016395.1;NbE05063272.1	NbD016395.1;NbE05063272.1	1256
NaN	NaN	NaN	17.3117	17.6991	17.3444				-1	6	6	5	12.3	12.3	10.1	66.03	0	46.118	1404200	30	12	NbE03058978.1;NbD031373.1;NbD016397.1;NbD002729.1	NbE03058978.1;NbD031373.1;NbD016397.1	1257
NaN	NaN	NaN	NaN	NaN	NaN				-1	1	1	1	2.9	2.9	2.9	56.149	0	16.233	200360	28	6	NbD016419.1	NbD016419.1	1258
NaN	NaN	NaN	NaN	NaN	NaN				-1	1	1	1	7.6	7.6	7.6	19.381	0.0038132	6.6186	84630	5	1	NbE03061591.1;NbD016424.1;NbD040178.1	NbE03061591.1;NbD016424.1;NbD040178.1	1259
NaN	NaN	NaN	NaN	18.6966	18.5438				-1	10	2	2	39.9	5.9	5.9	26.709	0	13.865	2063000	13	8	NbE03061032.1;NbD016434.1	NbE03061032.1;NbD016434.1	1260
NaN	NaN	NaN	NaN	NaN	NaN				-1	3	3	3	1.5	1.5	1.5	399.85	0	16.794	142330	168	4	NbD016456.1;NbE44071336.1;NbE44069429.1	NbD016456.1;NbE44071336.1;NbE44069429.1	1261
NaN	NaN	NaN	NaN	NaN	NaN				-1	1	1	1	6.4	6.4	6.4	25.839	0.0010745	7.6705	281510	9	5	NbD016496.1;NbE05063344.1	NbD016496.1;NbE05063344.1	1262
16.4955	16.4686	16.6745	16.1627	16.6283	16.283				-1	7	6	6	23.7	21	21	42.905	0	50.556	1697400	20	28	NbD016498.1;NbD053132.1;NbE05063343.1	NbD016498.1;NbD053132.1;NbE05063343.1	1263
NaN	NaN	NaN	NaN	NaN	NaN				-1	3	1	1	16.1	5.9	5.9	34.113	0.0019243	6.7313	140400	16	4	NbD016501.1	NbD016501.1	1264
NaN	17.4195	17.3606	17.3703	17.2522	NaN				-1	1	1	1	6.6	6.6	6.6	23.714	0.0010826	7.7068	931730	12	10	NbD016520.1	NbD016520.1	1265
17.6845	17.321	17.3283	17.0997	17.2712	16.9565				-1	5	5	2	18.4	18.4	6.4	38.441	0	50.538	2359100	21	27	NbD016523.1;NbE03057766.1	NbD016523.1;NbE03057766.1	1266
NaN	NaN	NaN	NaN	NaN	NaN				-1	3	3	3	11.4	11.4	11.4	56.438	0	19.764	277690	28	8	NbD016532.1;NbD006995.1;NbE03058721.1;NbD009404.1;NbE03053858.1;NbD029534.1;NbD026791.1	NbD016532.1;NbD006995.1	1267
17.3853	17.4769	17.41	17.4687	17.686	17.5933				-1	12	12	0	21	21	0	76.477	0	200.05	6055000	32	66	NbD016533.1;NbE03055581.1	NbD016533.1;NbE03055581.1	1268
15.6885	15.9196	NaN	16.2109	16.633	16.5854				-1	4	4	1	8.2	8.2	3.5	82.303	0	38.37	817090	27	14	NbD016562.1;NbE44071391.1	NbD016562.1;NbE44071391.1	1269
16.6174	NaN	16.6111	NaN	16.5719	NaN				-1	13	13	12	17.8	17.8	17	106.38	0	110.82	1581700	41	29	NbD016564.1	NbD016564.1	1270
16.287	16.8503	16.424	16.5036	NaN	16.718				-1	4	4	4	17.3	17.3	17.3	37.921	0	51.88	893520	14	14	NbD016610.1;NbE44071159.1;NbE05063925.1;NbD006600.1	NbD016610.1;NbE44071159.1;NbE05063925.1;NbD006600.1	1271
NaN	NaN	NaN	NaN	NaN	NaN				-1	2	2	2	15.2	15.2	15.2	21.86	0	22.27	377470	7	6	NbE03061965.1;NbD050288.1;NbD016617.1	NbE03061965.1;NbD050288.1;NbD016617.1	1272
NaN	NaN	NaN	NaN	NaN	NaN				-1	1	1	1	6.8	6.8	6.8	45.595	0.0034965	6.6273	1276700	18	2	NbD016628.1	NbD016628.1	1273
16.3184	16.6857	16.0328	16.6722	16.3284	16.4882				-1	8	8	8	19.5	19.5	19.5	69.005	0	57.552	1731800	38	27	NbD016647.1;NbD028544.1;NbD051143.1;NbE05066832.1	NbD016647.1;NbD028544.1	1274
NaN	NaN	NaN	NaN	NaN	NaN				-1	1	1	1	3.2	3.2	3.2	59.019	0.0074627	6.2007	24518	30	1	NbE03054790.1;NbD016660.1	NbE03054790.1;NbD016660.1	1275
NaN	NaN	NaN	NaN	NaN	NaN				-1	1	1	1	4.2	4.2	4.2	53.017	0.00041876	11.364	12837	23	1	NbD016668.1;NbE05066690.1	NbD016668.1;NbE05066690.1	1276
NaN	NaN	NaN	NaN	NaN	NaN				-1	2	1	1	4.3	1.5	1.5	67.046	0.008019	6.1728	1166400	24	5	NbD016675.1;NbD048720.1;NbE44069625.1	NbD016675.1;NbD048720.1;NbE44069625.1	1277
NaN	NaN	NaN	NaN	NaN	NaN				-1	1	1	1	2.8	2.8	2.8	81.18	0.0074694	6.2079	2697500	32	2	NbD016701.1	NbD016701.1	1279
NaN	NaN	NaN	NaN	NaN	NaN				-1	2	2	2	9.9	9.9	9.9	39.021	0	13.747	228900	17	3	NbE05068757.1;NbD016733.1;NbE44071574.1;NbE44069883.1;NbD049276.1	NbE05068757.1;NbD016733.1;NbE44071574.1;NbE44069883.1;NbD049276.1	1280
NaN	NaN	NaN	NaN	NaN	NaN				-1	1	1	1	13.9	13.9	13.9	11.135	0	16.447	1208100	6	3	NbD023686.1;NbD016759.1;NbD050696.1	NbD023686.1;NbD016759.1;NbD050696.1	1281
NaN	NaN	NaN	NaN	NaN	NaN				-1	3	3	3	13.3	13.3	13.3	30.387	0	23.971	171260	13	7	NbE03056865.1;NbD048792.1;NbD016785.1	NbE03056865.1;NbD048792.1;NbD016785.1	1282
14.6504	17.1421	15.4923	17.157	15.1882	16.9607				-1	16	16	11	26.9	26.9	20.2	79.462	0	108.58	2896700	42	50	NbD016824.1;NbE44070508.1;NbD048901.1	NbD016824.1;NbE44070508.1;NbD048901.1	1283
NaN	NaN	NaN	NaN	NaN	NaN				-1	1	1	1	6.1	6.1	6.1	35.935	0.0016399	6.8963	112580	17	4	NbD016828.1	NbD016828.1	1284
NaN	NaN	NaN	NaN	NaN	NaN				-1	3	3	2	13.8	13.8	9.4	41.658	0	15.45	79619	18	2	NbD016832.1;NbE44071352.1;NbD004675.1	NbD016832.1;NbE44071352.1;NbD004675.1	1285
18.1846	NaN	18.1122	NaN	17.8508	NaN				-1	3	3	3	5.9	5.9	5.9	58.268	0	24.272	1119600	23	9	NbE03058537.1;NbD028380.1;NbD016867.1	NbE03058537.1;NbD028380.1;NbD016867.1	1286
17.2336	18.45	17.175	18.4279	17.2867	18.2156				-1	7	7	1	46	46	10.7	16.345	0	54.119	3378100	6	26	NbD043694.1;NbD041460.1;NbD016868.1;NbD048288.1;NbD029946.1	NbD043694.1;NbD041460.1;NbD016868.1;NbD048288.1;NbD029946.1	1287
NaN	NaN	NaN	NaN	NaN	NaN				-1	2	2	2	19.9	19.9	19.9	16.748	0	43.789	3691300	8	7	NbD016876.1	NbD016876.1	1288
NaN	17.6594	NaN	17.6259	17.2169	18.153				-1	7	7	7	17.3	17.3	17.3	55.404	0	77.566	1949000	23	21	NbD016904.1;NbD037497.1;NbE44071666.1;NbE03056567.1;NbE03056568.1	NbD016904.1;NbD037497.1;NbE44071666.1;NbE03056567.1	1289
NaN	NaN	NaN	NaN	NaN	NaN				-1	1	1	1	3.2	3.2	3.2	56.971	0.0011424	8.2925	44621	27	1	NbE05066863.1;NbD016923.1	NbE05066863.1;NbD016923.1	1290
NaN	NaN	NaN	NaN	NaN	NaN				-1	3	1	1	10.7	7	7	61.461	0	13.894	115950	33	3	NbE05064056.1;NbE05063886.1;NbE03057129.1;NbD049722.1;NbD016934.1	NbE05064056.1;NbE05063886.1;NbE03057129.1;NbD049722.1;NbD016934.1	1291
NaN	NaN	NaN	NaN	NaN	NaN				-1	1	1	1	5.5	5.5	5.5	36.963	0.0011732	8.9065	108840	13	5	NbD052491.1;NbD016938.1;NbD037162.1	NbD052491.1;NbD016938.1;NbD037162.1	1292
NaN	17.6176	NaN	18.1429	16.8028	17.904				-1	7	7	6	33.5	33.5	30.1	23.584	0	93.08	1613500	11	16	NbD016943.1;NbD052939.1;NbD031589.1;NbD044031.1;NbD037388.1;NbD017022.1;NbD027710.1;NbD023451.1;NbD036571.1	NbD016943.1;NbD052939.1;NbD031589.1;NbD044031.1;NbD037388.1	1294
NaN	NaN	NaN	NaN	NaN	NaN				-1	1	1	1	1.6	1.6	1.6	91.308	0.001665	7.0427	17459	51	1	NbD047681.1;NbD046063.1;NbD016956.1	NbD047681.1;NbD046063.1;NbD016956.1	1295
NaN	NaN	NaN	NaN	NaN	NaN				-1	3	1	1	24.1	8.3	8.3	15.267	0.0048721	6.3377	139880	7	3	NbD035245.1;NbD016960.1	NbD035245.1;NbD016960.1	1296
16.3454	16.1383	16.6176	15.98	16.1401	15.9397				-1	6	6	6	9.4	9.4	9.4	99.925	0	41.18	889330	57	18	NbD046501.1;NbD017005.1;NbE05068431.1;NbD017006.1	NbD046501.1;NbD017005.1;NbE05068431.1;NbD017006.1	1297
16.1304	NaN	15.933	15.743	15.7541	15.4762				-1	10	8	8	23.1	20.6	20.6	65.708	0	62.715	776860	30	21	NbD035904.1;NbD017030.1	NbD035904.1;NbD017030.1	1298
NaN	NaN	NaN	NaN	NaN	NaN				-1	3	1	1	10.9	4.7	4.7	43.323	0.0016869	7.148	34834	26	1	NbD017043.1;NbD035485.1	NbD017043.1;NbD035485.1	1299
NaN	NaN	NaN	NaN	NaN	NaN				-1	3	1	1	10.1	4.3	4.3	29.426	0.0010961	7.8279	783760	11	6	NbD017054.1	NbD017054.1	1300
NaN	16.3754	NaN	16.4691	NaN	16.0949				-1	7	7	5	23.5	23.5	16.2	28.169	0	52.497	1028500	14	21	NbD017089.1;NbD037627.1;NbE03056336.1;NbD005240.1;NbD033219.1;NbD007127.1	NbD017089.1;NbD037627.1;NbE03056336.1;NbD005240.1;NbD033219.1;NbD007127.1	1301
NaN	NaN	NaN	NaN	NaN	NaN				-1	1	1	1	8.1	8.1	8.1	20.835	0.0011005	7.8609	1048200	11	6	NbD028753.1;NbD027622.1;NbD017099.1	NbD028753.1;NbD027622.1;NbD017099.1	1302
NaN	NaN	NaN	NaN	NaN	NaN				-1	4	1	1	21.6	8.8	8.8	24.819	0	16.154	1167700	12	6	NbD017118.1;NbE03061927.1	NbD017118.1;NbE03061927.1	1303
15.6617	15.7544	15.9522	15.8463	15.6494	15.9812				-1	8	8	8	13.6	13.6	13.6	120.32	0	70.277	1096900	36	33	NbE03058426.1;NbD017133.1	NbE03058426.1;NbD017133.1	1304
NaN	NaN	NaN	NaN	NaN	NaN				-1	4	2	0	11.2	6.4	0	64.908	0	14.134	188990	33	3	NbD017190.1;NbE05068088.1;NbE05066148.1	NbD017190.1;NbE05068088.1;NbE05066148.1	1305
NaN	NaN	NaN	NaN	NaN	NaN				-1	1	1	1	25	25	25	12.933	0.0011446	8.3037	317470	5	4	NbD044334.1;NbD039332.1;NbD039313.1;NbD031578.1;NbD025877.1;NbD017217.1	NbD044334.1;NbD039332.1;NbD039313.1;NbD031578.1;NbD025877.1;NbD017217.1	1306
17.5558	17.2225	17.5595	17.3055	17.2682	17.2703				-1	7	7	7	20.5	20.5	20.5	67.217	0	67.155	3001100	30	31	NbD017222.1;NbD027586.1	NbD017222.1	1307
NaN	NaN	NaN	NaN	NaN	NaN				-1	1	1	1	7	7	7	31.412	0	12.858	4797.2	15	1	NbD017227.1	NbD017227.1	1308
19.086	18.7176	18.872	18.6778	18.7977	18.5117				-1	12	12	5	33.8	33.8	14.8	42.548	0	142.52	9628100	25	65	NbD044898.1;NbD017233.1;NbE03055154.1;NbD017261.1	NbD044898.1;NbD017233.1	1309
16.4948	17.788	16.3572	17.8182	NaN	17.699				-1	6	6	6	31.3	31.3	31.3	17.177	0	37.663	1775500	6	17	NbD047158.1;NbD017235.1;NbE03054599.1;NbD007091.1;NbE03061703.1;NbD029913.1;NbD008071.1;NbD025691.1	NbD047158.1;NbD017235.1;NbE03054599.1;NbD007091.1;NbE03061703.1;NbD029913.1;NbD008071.1;NbD025691.1	1310
18.7108	17.4769	18.9951	17.7988	19.2245	17.8088				-1	9	9	3	11.9	11.9	5.2	110.89	0	97.393	7993200	39	45	NbD017236.1;NbD038221.1;NbE03056943.1;NbD002608.1;NbD008073.1	NbD017236.1	1311
16.554	NaN	16.233	16.2714	15.9744	16.187				-1	3	3	3	13.3	13.3	13.3	33.982	0	20.194	1072600	17	17	NbD020950.1;NbD017314.1	NbD020950.1;NbD017314.1	1312
NaN	NaN	NaN	NaN	NaN	NaN				-1	1	1	1	9.4	9.4	9.4	18.23	0	16.168	359420	11	6	NbE05064484.1;NbD017333.1;NbD025619.1	NbE05064484.1;NbD017333.1;NbD025619.1	1313
18.4658	17.8885	18.2348	17.5564	17.8784	17.5975				-1	4	4	2	23.8	23.8	12.2	16.073	0	45.198	3583400	6	21	NbD025615.1;NbD025613.1;NbD017335.1	NbD025615.1;NbD025613.1;NbD017335.1	1314
NaN	NaN	NaN	NaN	NaN	NaN				-1	3	1	1	23.8	12.2	12.2	16.162	0	13.001	461990	6	5	NbD017336.1	NbD017336.1	1315
NaN	NaN	NaN	NaN	NaN	NaN				-1	1	1	1	9	9	9	21.523	0.0017319	7.3736	129780	11	4	NbD017350.1	NbD017350.1	1316
NaN	NaN	NaN	NaN	NaN	NaN				-1	1	1	1	4.7	4.7	4.7	26.1	0.0054512	6.3037	435830	10	6	NbE44069504.1;NbE03059655.1;NbD048771.1;NbD017352.1	NbE44069504.1;NbE03059655.1;NbD048771.1;NbD017352.1	1317
19.1337	19.5717	18.8651	19.3411	18.7119	19.3485				-1	22	22	4	47.4	47.4	12.7	58.558	0	310.34	23584000	32	104	NbD017355.1	NbD017355.1	1318
NaN	NaN	NaN	NaN	NaN	NaN				-1	2	2	2	4.8	4.8	4.8	60.835	0	13.048	160090	27	3	NbD017394.1	NbD017394.1	1319
15.6884	NaN	NaN	15.7915	NaN	15.8453				-1	2	2	2	4.9	4.9	4.9	89.618	0	14.751	443630	41	9	NbE03061278.1;NbD017422.1;NbE44071490.1;NbD032642.1;NbD006136.1;NbD006127.1	NbE03061278.1;NbD017422.1;NbE44071490.1;NbD032642.1;NbD006136.1;NbD006127.1	1320
17.137	NaN	17.3719	NaN	17.0392	NaN				-1	17	5	2	33.5	12.3	8.7	58.12	0	35.338	776900	29	9	NbD017478.1	NbD017478.1	1321
NaN	NaN	NaN	NaN	NaN	NaN				-1	1	1	1	2.6	2.6	2.6	70.986	0	12.49	278550	33	6	NbE44070733.1;NbD050098.1;NbD017491.1	NbE44070733.1;NbD050098.1;NbD017491.1	1322
16.2369	15.808	NaN	NaN	NaN	NaN				-1	4	4	4	25.5	25.5	25.5	20.406	0	24.735	409480	9	8	NbD017495.1;NbE03061895.1;NbD051305.1	NbD017495.1;NbE03061895.1;NbD051305.1	1323
NaN	NaN	NaN	NaN	NaN	NaN				-1	1	1	1	7	7	7	25.265	0.0054152	6.2771	187820	13	3	NbD017724.1;NbD017502.1	NbD017724.1;NbD017502.1	1324
NaN	NaN	NaN	15.3313	NaN	15.5884				-1	2	2	2	4.8	4.8	4.8	90.861	0	22.177	182180	42	5	NbD017715.1;NbD017508.1	NbD017715.1;NbD017508.1	1325
NaN	NaN	NaN	NaN	NaN	NaN				-1	1	1	1	1.4	1.4	1.4	128.17	0.001648	6.9251	39030	45	1	NbD017525.1	NbD017525.1	1326
NaN	NaN	NaN	NaN	NaN	NaN				-1	2	1	1	4.4	2.7	2.7	61.719	0.0011682	8.7858	166970	34	3	NbE03059226.1;NbD017552.1;NbD028806.1;NbE44073068.1	NbE03059226.1;NbD017552.1;NbD028806.1;NbE44073068.1	1327
NaN	NaN	NaN	NaN	17.1485	16.2365				-1	2	2	2	5.8	5.8	5.8	52.979	0	21.784	612430	26	7	NbD037503.1;NbD017556.1	NbD037503.1;NbD017556.1	1328
16.8305	16.9976	NaN	16.8937	16.7629	NaN				-1	5	2	2	18.6	7.5	7.5	40.834	0	15.18	981250	24	10	NbE44071820.1;NbD033062.1;NbD017595.1	NbE44071820.1;NbD033062.1;NbD017595.1	1329
16.2195	16.4054	16.1866	16.4991	16.1243	15.8743				-1	4	4	4	15.3	15.3	15.3	34.064	0	32.314	860790	19	15	NbD017641.1;NbD047529.1;NbE44069423.1	NbD017641.1;NbD047529.1;NbE44069423.1	1331
NaN	NaN	NaN	NaN	NaN	NaN				-1	1	1	1	4.2	4.2	4.2	38.088	0.0080285	6.1767	25413	19	1	NbE03061505.1;NbD017675.1	NbE03061505.1;NbD017675.1	1332
20.0099	19.5467	19.8276	19.427	19.7183	19.2492				-1	4	4	1	24.2	24.2	9.5	29.204	0	55.401	9104900	8	23	NbD017696.1;NbD047786.1;NbE03059616.1	NbD017696.1;NbD047786.1;NbE03059616.1	1333
NaN	16.546	NaN	NaN	NaN	15.8917				-1	2	2	2	5	5	5	34.852	0	15.531	362060	15	6	NbD027505.1;NbD017705.1	NbD027505.1;NbD017705.1	1334
NaN	NaN	NaN	NaN	NaN	NaN				-1	1	1	1	5.4	5.4	5.4	51.525	0.0049005	6.3612	115260	26	3	NbD017725.1	NbD017725.1	1335
NaN	NaN	NaN	NaN	NaN	NaN				-1	2	1	1	8.4	5	5	43.182	0.0017532	7.5338	454780	23	4	NbD017747.1	NbD017747.1	1336
NaN	NaN	NaN	NaN	NaN	NaN				-1	2	2	1	3.1	3.1	1.5	112.36	0.0012019	9.5903	10705	55	1	NbD017748.1;NbD033425.1;NbE05063932.1;NbD012036.1	NbD017748.1;NbD033425.1;NbE05063932.1;NbD012036.1	1337
NaN	NaN	NaN	NaN	NaN	NaN				-1	1	1	1	4.7	4.7	4.7	25.68	0.0044108	6.5548	337080	9	5	NbD017754.1	NbD017754.1	1338
NaN	NaN	16.4602	16.0176	16.4141	15.9877				-1	2	2	2	5.5	5.5	5.5	52.062	0	13.378	526560	21	9	NbD017755.1	NbD017755.1	1339
18.9555	18.1454	18.9075	18.142	18.7992	18.1547				-1	4	4	4	12.8	12.8	12.8	52.896	0	64.15	3547600	22	27	NbD017761.1	NbD017761.1	1340
NaN	NaN	NaN	NaN	NaN	NaN				-1	1	1	1	2.6	2.6	2.6	73.877	0.0016356	6.8798	223020	35	3	NbD017773.1	NbD017773.1	1341
NaN	NaN	NaN	NaN	NaN	NaN				-1	1	1	1	1.7	1.7	1.7	51.247	0.00489	6.3538	836200	21	4	NbD046303.1;NbD023569.1;NbD017782.1	NbD046303.1;NbD023569.1;NbD017782.1	1342
NaN	NaN	NaN	NaN	NaN	NaN				-1	1	1	1	0.9	0.9	0.9	190.46	0	16.415	194200	85	4	NbE05066418.1;NbD017794.1	NbE05066418.1;NbD017794.1	1343
16.2936	16.888	16.1584	16.8615	15.7912	16.8507				-1	9	9	9	16.6	16.6	16.6	91.069	0	83.177	3003800	42	50	NbE03054662.1;NbD017803.1;NbD020890.1;NbD021263.1;NbD010507.1	NbE03054662.1;NbD017803.1;NbD020890.1	1344
NaN	NaN	NaN	NaN	NaN	NaN				-1	3	3	3	14.1	14.1	14.1	31.077	0	35.128	573130	16	5	NbD017819.1;NbE44069105.1	NbD017819.1;NbE44069105.1	1345
NaN	NaN	NaN	NaN	NaN	NaN				-1	3	1	1	16.9	5	5	29.395	0.0011442	8.3026	216470	16	2	NbD017820.1	NbD017820.1	1346
20.0927	20.759	20.0581	20.9526	20.1321	20.8509				-1	13	13	11	54.6	54.6	48.1	29.364	0	297.42	23236000	17	72	NbD019050.1;NbD017822.1	NbD019050.1;NbD017822.1	1347
20.9146	20.4511	20.8959	20.1995	20.5991	20.1138				-1	11	11	2	28.9	28.9	6.1	37.523	0	234.96	21169000	20	59	NbD017832.1	NbD017832.1	1348
NaN	NaN	16.7309	18.1427	16.9017	17.2057				-1	4	4	4	13.9	13.9	13.9	32.598	0	31.295	1545000	9	13	NbE44072063.1;NbD017939.1;NbD017850.1;NbD033514.1;NbD046729.1	NbE44072063.1;NbD017939.1;NbD017850.1;NbD033514.1;NbD046729.1	1349
NaN	16.1568	NaN	NaN	NaN	16.2721				-1	7	3	3	30.9	15.6	15.6	35.864	0	25.438	438820	19	10	NbD017866.1	NbD017866.1	1350
NaN	NaN	NaN	NaN	NaN	NaN				-1	1	1	1	3.6	3.6	3.6	35.284	0.004878	6.3429	82418	16	2	NbD017869.1	NbD017869.1	1351
NaN	NaN	NaN	NaN	NaN	NaN				-1	5	3	3	19	10.4	10.4	49.12	0	27.999	101530	19	4	NbE44072647.1;NbD017916.1	NbE44072647.1;NbD017916.1	1352
16.7342	16.075	16.9147	15.9852	16.8478	15.9632				-1	13	8	2	19.9	11.7	3.3	98.345	0	61.023	1554100	55	23	NbD017942.1	NbD017942.1	1353
NaN	NaN	NaN	NaN	NaN	NaN				-1	5	1	1	13.1	3.6	3.6	57.181	0.0011107	7.946	283580	23	5	NbD017972.1;NbE05062946.1;NbE44071118.1	NbD017972.1	1354
NaN	17.2047	16.9754	NaN	16.6367	NaN				-1	2	2	1	2.4	2.4	1.4	96.112	0.0054266	6.2901	878310	54	9	NbE05066767.1;NbE44073222.1;NbE44073516.1;NbE05063988.1;NbD041356.1;NbD017990.1	NbE05066767.1;NbE44073222.1;NbE44073516.1;NbE05063988.1;NbD041356.1;NbD017990.1	1355
17.4411	17.5664	17.0566	17.3809	17.306	17.4414				-1	12	5	5	34.1	14.7	14.7	55.858	0	48.901	1657400	24	21	NbD017994.1;NbD050796.1	NbD017994.1	1356
NaN	NaN	NaN	NaN	NaN	NaN				-1	5	1	1	12.1	4.1	4.1	55.197	0.00083091	11.164	511690	26	6	NbD017996.1	NbD017996.1	1357
NaN	NaN	NaN	NaN	NaN	NaN				-1	2	2	2	5.2	5.2	5.2	65.702	0	18.894	247630	30	8	NbD045650.1;NbE03056990.1;NbD018032.1	NbD045650.1;NbE03056990.1;NbD018032.1	1358
17.1452	16.8929	17.0335	16.7253	16.8229	16.905				-1	15	15	2	47.2	47.2	6.6	55.196	0	156.61	3334700	32	59	NbD018053.1;NbD038997.1;NbE44070960.1;NbE44070961.1	NbD018053.1;NbD038997.1;NbE44070960.1	1359
NaN	NaN	NaN	NaN	NaN	NaN				-1	2	2	2	6.9	6.9	6.9	44.304	0.00082679	11.066	34533	22	2	NbD022302.1;NbD018058.1	NbD022302.1;NbD018058.1	1360
NaN	NaN	NaN	NaN	NaN	NaN				-1	1	1	1	4.5	4.5	4.5	52.364	0	11.768	60356	26	3	NbE44071766.1;NbE03061767.1;NbD018068.1;NbD022309.1	NbE44071766.1;NbE03061767.1;NbD018068.1;NbD022309.1	1361
19.2723	18.5489	18.9848	18.162	18.8151	18.3172				-1	5	5	2	27.7	27.7	9.5	16.299	0	80.414	9259900	9	39	NbE05064459.1;NbD032154.1;NbD018089.1;NbE05063281.1;NbD017960.1	NbE05064459.1;NbD032154.1;NbD018089.1;NbE05063281.1;NbD017960.1	1362
15.8476	16.2486	15.9661	15.9138	15.9609	15.9457				-1	5	5	5	16.3	16.3	16.3	38.372	0	41.851	820090	19	18	NbD018100.1;NbD032229.1	NbD018100.1	1363
16.6575	16.3684	16.3509	16.2835	16.2443	16.4284				-1	12	12	12	17	17	17	119.84	0	122.41	1508100	59	31	NbD018101.1	NbD018101.1	1364
NaN	NaN	NaN	NaN	NaN	NaN				-1	2	2	2	17	17	17	18.694	0	14.787	125700	7	4	NbD018105.1;NbD038917.1	NbD018105.1;NbD038917.1	1365
16.4991	16.0677	16.1019	16.2737	16.5071	16.1789				-1	6	6	6	14.9	14.9	14.9	68.219	0	44.896	1083000	37	21	NbD018114.1;NbE03054074.1;NbE03057205.1;NbD017984.1;NbD003211.1	NbD018114.1;NbE03054074.1	1366
16.2578	16.1796	16.0981	15.9187	16.0758	15.8048				-1	9	9	9	11.5	11.5	11.5	127.3	0	75.702	1464200	70	30	NbD018122.1;NbE44071010.1;NbD031349.1	NbD018122.1;NbE44071010.1;NbD031349.1	1367
NaN	NaN	NaN	NaN	NaN	NaN				-1	1	1	1	6.8	6.8	6.8	29.155	0.0011025	7.8867	35201	14	1	NbD018131.1	NbD018131.1	1368
NaN	NaN	NaN	NaN	NaN	NaN				-1	4	1	1	17	6.2	6.2	24.878	0.0011058	7.9004	593500	17	6	NbD035315.1;NbD018157.1;NbD008007.1;NbD010183.1	NbD035315.1;NbD018157.1;NbD008007.1	1369
NaN	NaN	NaN	NaN	NaN	NaN				-1	2	2	2	9.9	9.9	9.9	35.321	0	14.504	176750	14	5	NbD049928.1;NbD025217.1;NbD018180.1;NbE44071178.1;NbE05065511.1;NbD009769.1	NbD049928.1;NbD025217.1;NbD018180.1;NbE44071178.1;NbE05065511.1;NbD009769.1	1370
NaN	NaN	NaN	NaN	NaN	NaN				-1	1	1	1	2.9	2.9	2.9	75.238	0.0016858	7.1446	38563	34	1	NbD018190.1	NbD018190.1	1371
19.0909	19.117	18.7612	18.6973	18.7103	18.7472				-1	17	17	17	46.2	46.2	46.2	36.651	0	188.07	11550000	17	81	NbD018194.1	NbD018194.1	1372
16.1115	16.1341	15.6051	15.7512	15.803	16.0423				-1	6	6	5	5.9	5.9	4.6	172.67	0	48.544	990390	88	23	NbD018228.1;NbE05065794.1;NbD005475.1;NbE05065532.1;NbD028140.1;NbD047109.1;NbE03053329.1;NbD020991.1;NbE03058306.1;NbD044475.1;NbD012191.1;NbD044192.1	NbD018228.1;NbE05065794.1;NbD005475.1	1373
NaN	NaN	NaN	NaN	NaN	NaN				-1	1	1	1	2.3	2.3	2.3	87.78	0.0043942	6.5252	24747	38	1	NbD018234.1	NbD018234.1	1374
19.2201	19.0243	19.1172	19.5371	19.3524	19.487				-1	14	14	6	51.3	51.3	17.4	35.92	0	214.1	14025000	17	96	NbD018307.1;NbE05065193.1;NbD003101.1	NbD018307.1;NbE05065193.1	1375
NaN	NaN	NaN	NaN	NaN	NaN				-1	2	2	2	7.4	7.4	7.4	52.075	0	12.255	209080	26	5	NbD018316.1;NbE03053855.1;NbD014172.1	NbD018316.1;NbE03053855.1;NbD014172.1	1376
NaN	NaN	NaN	16.5265	16.3328	16.3612				-1	3	3	1	22.6	22.6	7.1	26.368	0	23.082	536990	17	8	NbD018339.1	NbD018339.1	1377
16.8359	15.8162	16.6677	NaN	15.6827	15.3964				-1	3	3	3	4.2	4.2	4.2	77.024	0	36.289	678390	41	11	NbD018345.1	NbD018345.1	1378
16.9224	NaN	16.9215	NaN	17.0588	16.0267				-1	9	2	2	41.5	10.7	10.7	31.696	0	32.506	966160	16	14	NbE05068318.1;NbD022333.1;NbD018346.1;NbD047322.1;NbD003973.1	NbE05068318.1;NbD022333.1;NbD018346.1;NbD047322.1	1379
NaN	NaN	NaN	NaN	NaN	NaN				-1	3	3	3	19.7	19.7	19.7	21.629	0	23.761	604570	10	8	NbE03061782.1;NbD018355.1;NbD031453.1;NbD005248.1;NbE05067787.1	NbE03061782.1;NbD018355.1;NbD031453.1	1380
17.6957	17.3664	17.1588	17.4679	17.484	17.2687				-1	10	4	4	11.3	4.8	4.8	116.18	0	55.288	2349100	45	23	NbD018366.1	NbD018366.1	1381
NaN	NaN	NaN	NaN	NaN	NaN				-1	1	1	1	1.8	1.8	1.8	92.671	0.0074493	6.1896	77748	41	1	NbE05064737.1;NbD018400.1;NbD018369.1	NbE05064737.1;NbD018400.1;NbD018369.1	1382
16.8747	16.7199	16.7858	NaN	16.5283	NaN				-1	5	5	5	37.4	37.4	37.4	28.56	0	43.439	1027500	14	17	NbD018372.1;NbD041550.1;NbE05067745.1;NbD044246.1	NbD018372.1;NbD041550.1	1384
NaN	NaN	NaN	NaN	NaN	NaN				-1	2	2	2	3.2	3.2	3.2	69.711	0	14.495	297700	36	6	NbE03053754.1;NbD028079.1;NbE44072263.1;NbD018426.1	NbE03053754.1;NbD028079.1;NbE44072263.1;NbD018426.1	1385
16.5643	17.3315	NaN	NaN	16.4526	16.9591				-1	3	3	3	39.2	39.2	39.2	14.79	0	31.461	1088900	8	12	NbD050817.1;NbD040573.1;NbD019471.1;NbD018428.1;NbE05065820.1;NbD034970.1;NbE44073433.1;NbE03060055.1;NbD020181.1;NbD020182.1	NbD050817.1;NbD040573.1;NbD019471.1;NbD018428.1;NbE05065820.1;NbD034970.1;NbE44073433.1;NbE03060055.1;NbD020181.1	1386
NaN	NaN	NaN	NaN	NaN	NaN				-1	1	1	1	3.4	3.4	3.4	56.564	0.001219	10.273	44844	24	3	NbD018441.1;NbE44073511.1	NbD018441.1;NbE44073511.1	1387
19.278	18.8823	19.4212	19.0961	19.4699	19.1019				-1	11	11	11	42.5	42.5	42.5	30.413	0	114.86	9746500	14	49	NbD032924.1;NbD018463.1	NbD032924.1;NbD018463.1	1388
16.2693	16.6643	16.5332	16.3301	16.9297	16.7947				-1	13	4	4	39.2	17.5	17.5	42.319	0	32.651	945930	26	15	NbD018500.1;NbD034139.1	NbD018500.1;NbD034139.1	1389
17.8433	17.8815	18.1163	18.4861	19.1507	19.0121				-1	23	6	6	63.4	18.9	18.9	50.186	0	108.53	4072700	32	26	NbE03057227.1;NbD018501.1	NbE03057227.1;NbD018501.1	1390
15.8359	NaN	15.6003	15.7994	15.4827	15.4088				-1	2	2	2	6.1	6.1	6.1	39.189	0	32.6	533010	17	13	NbE05063588.1;NbD034153.1;NbD018507.1	NbE05063588.1;NbD034153.1;NbD018507.1	1391
NaN	NaN	NaN	NaN	NaN	NaN				-1	1	1	1	1.7	1.7	1.7	93.88	0.0010877	7.7541	290780	42	6	NbE05065445.1;NbD034548.1;NbE05066599.1;NbD018542.1	NbE05065445.1;NbD034548.1;NbE05066599.1;NbD018542.1	1392
NaN	NaN	NaN	NaN	NaN	NaN				-1	5	5	5	16.2	16.2	16.2	43.546	0	31.756	628820	23	10	NbD018544.1;NbE03056115.1;NbD034546.1	NbD018544.1;NbE03056115.1;NbD034546.1	1393
NaN	NaN	NaN	NaN	NaN	NaN				-1	3	2	1	13.5	9.4	5.3	36.959	0	14.436	124200	20	3	NbE03060453.1;NbD018548.1	NbE03060453.1;NbD018548.1	1394
NaN	18.4213	16.219	18.9218	16.4751	19.2888				-1	8	8	5	19	19	11.1	54.177	0	88.436	3306200	31	26	NbD018551.1;NbD013071.1	NbD018551.1	1395
18.2817	17.5327	17.9263	17.0799	17.406	17.1112				-1	3	3	3	11.4	11.4	11.4	34.723	0	52.992	1868300	17	13	NbD018560.1;NbD041691.1	NbD018560.1	1396
NaN	NaN	NaN	NaN	NaN	NaN				-1	4	1	1	29.1	10.8	10.8	16.638	0.0010784	7.6755	441330	10	4	NbD018578.1;NbE03054530.1	NbD018578.1	1397
17.9598	17.5611	17.9232	17.2427	17.6462	17.3867				-1	6	6	2	19.1	19.1	6.9	50.16	0	70.694	4735000	22	41	NbD018589.1	NbD018589.1	1398
16.5492	15.9775	16.3432	15.838	16.0923	15.897				-1	6	6	5	29.1	29.1	24.9	38.134	0	43.66	948070	16	20	NbD018614.1;NbD025596.1;NbE44071431.1;NbE03059458.1;NbD004127.1;NbE03053461.1;NbE44070660.1	NbD018614.1;NbD025596.1;NbE44071431.1;NbE03059458.1;NbD004127.1;NbE03053461.1;NbE44070660.1	1399
NaN	NaN	NaN	NaN	NaN	NaN				-1	3	1	1	21.7	9.8	9.8	15.801	0.0017241	7.3338	507390	9	4	NbD018627.1	NbD018627.1	1400
NaN	NaN	NaN	NaN	NaN	NaN				-1	9	3	0	32.4	10.1	0	50.264	0	80.922	689890	21	9	NbD031738.1;NbD018637.1	NbD031738.1;NbD018637.1	1401
16.2412	16.5636	16.4687	16.6429	16.7341	16.5232				-1	2	2	2	6.7	6.7	6.7	45.597	0	15.866	927590	20	13	NbD018639.1;NbD031736.1	NbD018639.1;NbD031736.1	1402
20.219	19.5056	20.0559	19.6691	19.8541	19.5307				-1	24	24	24	25.7	25.7	25.7	110.58	0	323.31	35051000	42	183	NbD018648.1;NbE44070351.1;NbE44072593.1;NbD026130.1	NbD018648.1;NbE44070351.1;NbE44072593.1;NbD026130.1	1403
NaN	NaN	NaN	NaN	NaN	NaN				-1	2	2	2	9.2	9.2	9.2	25.517	0	11.486	51926	13	2	NbD018679.1	NbD018679.1	1404
NaN	16.3038	NaN	15.9599	NaN	NaN				-1	4	4	4	14.5	14.5	14.5	32.212	0	27.753	729310	21	15	NbD018739.1;NbE03056014.1;NbD048454.1	NbD018739.1;NbE03056014.1;NbD048454.1	1405
NaN	NaN	NaN	NaN	NaN	NaN				-1	1	1	1	12.5	12.5	12.5	14.25	0.0010807	7.6964	131960	5	3	NbE05068055.1;NbD018747.1;NbD031056.1	NbE05068055.1;NbD018747.1;NbD031056.1	1406
17.4291	17.2535	17.4258	NaN	17.4539	NaN				-1	13	2	2	31.9	5.3	5.3	66.341	0	21.093	1126700	36	10	NbD018751.1	NbD018751.1	1407
NaN	17.2455	NaN	17.1672	17.0241	17.1688				-1	8	8	2	29.8	29.8	7.9	33.507	0	68.721	1666500	21	24	NbD018767.1	NbD018767.1	1408
NaN	NaN	NaN	NaN	NaN	NaN				-1	8	1	1	28.1	3.8	3.8	42.697	0.0016171	6.7982	695630	20	7	NbD018777.1;NbE03056049.1;NbD047769.1	NbD018777.1;NbE03056049.1;NbD047769.1	1409
NaN	NaN	NaN	NaN	NaN	NaN				-1	1	1	1	6.9	6.9	6.9	26.433	0.0010631	7.6188	163340	12	4	NbD025622.1;NbD018790.1	NbD025622.1;NbD018790.1	1410
NaN	NaN	NaN	NaN	NaN	NaN				-1	2	1	1	2.9	1.7	1.7	109.36	0.0085875	6.1517	18550	44	1	NbD024514.1;NbD018792.1	NbD024514.1;NbD018792.1	1411
16.7373	16.892	16.9391	17.5282	17.3285	17.5892				-1	4	3	1	23	17.5	11.5	19.921	0	29.402	1479700	12	16	NbD018815.1	NbD018815.1	1412
15.5024	NaN	NaN	15.0489	16.0168	15.4077				-1	4	4	4	13.5	13.5	13.5	59.965	0	31.045	445470	32	12	NbD018821.1;NbE03060838.1;NbD005507.1	NbD018821.1;NbE03060838.1	1413
NaN	NaN	NaN	NaN	NaN	NaN				-1	1	1	1	1.6	1.6	1.6	87.031	0.0010604	7.6089	39735	35	2	NbD018824.1	NbD018824.1	1414
16.9049	16.3529	17.2839	17.4317	16.5078	16.6884				-1	6	6	5	21.5	21.5	18.3	42.198	0	39.558	1204800	18	17	NbE03055316.1;NbD042058.1;NbD018930.1;NbD048133.1;NbE05067151.1;NbD010017.1	NbE03055316.1;NbD042058.1;NbD018930.1	1415
NaN	NaN	NaN	NaN	NaN	NaN				-1	3	3	3	10.9	10.9	10.9	48.99	0	21.97	74276	25	4	NbD018950.1;NbE03054710.1;NbE44069833.1	NbD018950.1;NbE03054710.1	1416
NaN	NaN	NaN	NaN	NaN	NaN				-1	1	1	1	3.6	3.6	3.6	53.209	0.0017071	7.2552	27905	26	2	NbD018970.1	NbD018970.1	1417
16.0041	16.4853	16.0098	16.3719	NaN	16.4753				-1	4	4	4	11	11	11	62.911	0	33.468	765640	25	15	NbD049144.1;NbD018979.1	NbD049144.1;NbD018979.1	1418
NaN	NaN	NaN	NaN	NaN	NaN				-1	2	2	2	16.2	16.2	16.2	25.746	0	11.807	132030	14	3	NbD051070.1;NbD018994.1	NbD051070.1;NbD018994.1	1419
NaN	NaN	NaN	NaN	NaN	NaN				-1	1	1	1	7.7	7.7	7.7	20.474	0.0074649	6.201	115830	9	1	NbD034767.1;NbD019002.1	NbD034767.1;NbD019002.1	1420
NaN	NaN	NaN	NaN	NaN	NaN				-1	1	1	1	1.4	1.4	1.4	154.82	0.0044081	6.545	53093	72	1	NbD019024.1	NbD019024.1	1421
NaN	NaN	NaN	NaN	NaN	NaN				-1	2	2	2	12.7	12.7	12.7	27.851	0	14.503	235710	14	4	NbD019026.1;NbE05066763.1	NbD019026.1;NbE05066763.1	1422
17.7063	NaN	17.4566	NaN	NaN	NaN				-1	8	2	2	23.1	6.9	6.9	37.696	0	30.742	831390	18	8	NbE05063541.1;NbD019057.1	NbE05063541.1;NbD019057.1	1423
NaN	NaN	NaN	NaN	NaN	NaN				-1	1	1	1	2.6	2.6	2.6	70.152	0.0016113	6.766	173650	41	4	NbE03061433.1;NbE03058870.1;NbD036565.1;NbD019097.1	NbE03061433.1;NbE03058870.1;NbD036565.1;NbD019097.1	1424
NaN	NaN	16.5133	NaN	16.9538	NaN				-1	16	2	2	34.1	4.7	4.7	61.451	0	15.107	714550	30	9	NbD019109.1	NbD019109.1	1425
NaN	NaN	NaN	NaN	NaN	NaN				-1	2	2	1	13.5	13.5	8.2	36.05	0	25.554	269910	16	6	NbD019138.1;NbD041234.1	NbD019138.1;NbD041234.1	1426
17.4937	17.8673	17.7492	17.7369	18.1772	17.9565				-1	6	3	3	31.1	23.3	23.3	25.11	0	46.631	3525900	9	32	NbD019140.1	NbD019140.1	1427
NaN	NaN	NaN	NaN	NaN	NaN				-1	7	5	4	11.8	9.4	7.2	108.25	0	31.527	338260	53	6	NbD021260.1;NbD019145.1;NbD010272.1;NbD019667.1	NbD021260.1;NbD019145.1	1428
15.8799	15.8527	16.0246	15.7175	16.0729	15.9525				-1	4	4	4	9.5	9.5	9.5	68.746	0	44.217	816630	24	16	NbD019152.1	NbD019152.1	1429
21.2504	20.4725	21.106	20.116	20.7182	20.3022				-1	5	5	5	11.4	11.4	11.4	68.209	0	150.83	11199000	28	21	NbD019169.1;NbD041588.1	NbD019169.1;NbD041588.1	1430
NaN	NaN	NaN	NaN	NaN	NaN				-1	1	1	1	4.7	4.7	4.7	37.711	0.0014065	7.569	118890	21	3	NbE03057947.1;NbD029729.1;NbD019177.1	NbE03057947.1;NbD029729.1;NbD019177.1	1431
NaN	NaN	NaN	NaN	NaN	NaN				-1	1	1	1	8.3	8.3	8.3	29.036	0.0016978	7.1945	225780	16	3	NbD019192.1	NbD019192.1	1432
NaN	NaN	NaN	NaN	NaN	NaN				-1	1	1	1	2	2	2	94.582	0.0010846	7.7225	282050	48	5	NbE44072836.1;NbD032274.1;NbD019200.1	NbE44072836.1;NbD032274.1;NbD019200.1	1433
16.3392	15.8131	16.7666	16.5971	17.1568	16.4568				-1	8	8	2	21.8	21.8	7.8	50.982	0	60.743	1522000	22	24	NbD019202.1;NbD011745.1	NbD019202.1;NbD011745.1	1434
NaN	NaN	NaN	NaN	16.4209	15.8489				-1	2	2	2	15	15	15	21.983	0	28.104	418900	11	8	NbD036508.1;NbD019203.1	NbD036508.1;NbD019203.1	1435
NaN	NaN	NaN	NaN	NaN	NaN				-1	12	2	2	28.7	5.5	5.5	60.869	0	13.239	98497	34	5	NbD019219.1	NbD019219.1	1436
NaN	NaN	NaN	NaN	NaN	NaN				-1	2	2	2	4.3	4.3	4.3	79.038	0	13.12	353420	36	5	NbD019220.1;NbD025910.1;NbE03058791.1	NbD019220.1;NbD025910.1;NbE03058791.1	1437
18.2449	17.218	18.4107	17.5934	18.6435	17.5795				-1	8	8	8	16.3	16.3	16.3	68.6	0	76.86	3011900	37	26	NbD019222.1;NbD008676.1;NbD026874.1;NbD025911.1	NbD019222.1;NbD008676.1	1438
NaN	NaN	15.3675	15.5829	15.8177	NaN				-1	2	2	2	19.6	19.6	19.6	20.013	0	26.742	334550	9	10	NbD025912.1;NbD019223.1	NbD025912.1;NbD019223.1	1439
16.3978	NaN	16.4272	16.4892	16.3407	16.5236				-1	9	9	4	17.5	17.5	9.1	86.032	0	98.705	1233000	48	20	NbD019226.1	NbD019226.1	1440
NaN	NaN	17.2892	16.3105	17.0181	NaN				-1	4	2	0	6.8	1.6	0	78.706	0	26.03	690630	27	10	NbD019235.1;NbE05068706.1;NbE03058169.1;NbD003291.1	NbD019235.1;NbE05068706.1;NbE03058169.1;NbD003291.1	1441
NaN	NaN	NaN	NaN	NaN	NaN				-1	1	1	1	4.2	4.2	4.2	42.778	0	11.576	342460	24	4	NbD019292.1	NbD019292.1	1442
17.5687	18.3423	17.7691	18.1077	17.5077	18.0878				-1	9	9	9	16.2	16.2	16.2	78.3	0	119.22	4812200	41	41	NbD019309.1;NbD004166.1;NbE05067776.1	NbD019309.1;NbD004166.1;NbE05067776.1	1443
15.843	15.0713	15.8168	NaN	14.965	14.9844				-1	3	3	3	5.4	5.4	5.4	86.81	0	24.082	455630	38	14	NbE44071300.1;NbE03061516.1;NbD036988.1;NbD019312.1	NbE44071300.1;NbE03061516.1;NbD036988.1;NbD019312.1	1444
NaN	17.0638	17.1995	17.3685	NaN	NaN				-1	3	3	3	11.9	11.9	11.9	31.982	0	22.62	750810	17	9	NbD019343.1;NbD052390.1	NbD019343.1	1445
16.4683	15.9462	16.582	16.3721	16.6112	16.3154				-1	5	5	5	10.2	10.2	10.2	65.443	0	54.894	1014700	25	19	NbD031076.1;NbD019389.1;NbD044787.1;NbD000396.1;NbD000101.1	NbD031076.1;NbD019389.1;NbD044787.1;NbD000396.1	1446
16.0422	16.5154	16.5728	NaN	16.4712	16.4722				-1	6	6	6	9.6	9.6	9.6	105.91	0	62.128	1018200	50	18	NbD019394.1;NbE03057315.1;NbD039395.1	NbD019394.1;NbE03057315.1;NbD039395.1	1447
NaN	NaN	NaN	NaN	NaN	NaN				-1	1	1	1	6.9	6.9	6.9	32.631	0.0046512	6.4485	183530	17	5	NbD019397.1	NbD019397.1	1448
NaN	NaN	NaN	NaN	NaN	NaN				-1	4	1	1	17.1	7.3	7.3	31.037	0.0012245	10.511	299600	17	7	NbD019401.1;NbE03061728.1;NbD012528.1	NbD019401.1	1449
NaN	16.8528	NaN	17.11	16.8162	17.136				-1	36	3	3	54.3	8.6	8.6	52.722	0	26.968	1307100	23	13	NbD019408.1	NbD019408.1	1450
NaN	NaN	NaN	NaN	NaN	NaN				-1	1	1	1	2.8	2.8	2.8	65.708	0.0019151	6.687	107270	33	2	NbD029981.1;NbE03060788.1;NbD029959.1;NbD019432.1;NbE44073236.1;NbE05063679.1;NbD022150.1	NbD029981.1;NbE03060788.1;NbD029959.1;NbD019432.1;NbE44073236.1;NbE05063679.1;NbD022150.1	1451
NaN	NaN	NaN	NaN	NaN	NaN				-1	1	1	1	3	3	3	78.652	0.0016875	7.1511	85661	36	2	NbD019437.1;NbD022146.1	NbD019437.1;NbD022146.1	1452
NaN	NaN	NaN	NaN	NaN	NaN				-1	1	1	1	5.4	5.4	5.4	29.323	0.0016943	7.1782	89943	15	2	NbE03058204.1;NbD039851.1;NbD019515.1	NbE03058204.1;NbD039851.1;NbD019515.1	1453
NaN	NaN	NaN	18.1825	18.3491	18.4666				-1	2	2	2	12.2	12.2	12.2	27.779	0	35.91	1765100	13	10	NbE03054834.1;NbD039292.1;NbD019522.1	NbE03054834.1;NbD039292.1;NbD019522.1	1454
NaN	NaN	NaN	NaN	NaN	NaN				-1	5	1	1	26.9	6.5	6.5	23.76	0.0088652	6.137	86463	16	2	NbD019532.1	NbD019532.1	1455
17.6202	NaN	NaN	NaN	17.4889	NaN				-1	4	2	2	15.9	3	3	35.394	0	12.201	1131900	22	8	NbD035063.1;NbD019558.1	NbD035063.1;NbD019558.1	1456
NaN	NaN	NaN	NaN	NaN	NaN				-1	3	3	3	9.3	9.3	9.3	62.477	0	24.145	386590	25	6	NbD051135.1;NbD019563.1	NbD051135.1;NbD019563.1	1457
NaN	17.8697	NaN	17.7395	NaN	NaN				-1	5	5	2	29.2	29.2	7.9	21.453	0	44.75	1027800	9	11	NbD048058.1;NbD019568.1;NbD040743.1;NbD042343.1	NbD048058.1;NbD019568.1;NbD040743.1;NbD042343.1	1458
16.7288	16.2414	NaN	NaN	NaN	15.7775				-1	2	2	1	6.6	6.6	3.4	52.415	0	15.216	598410	26	9	NbE05066733.1;NbE05063127.1;NbD042344.1;NbD019569.1	NbE05066733.1;NbE05063127.1;NbD042344.1;NbD019569.1	1459
NaN	NaN	NaN	19.1403	NaN	19.0683				-1	4	4	4	15.1	15.1	15.1	24.775	0	24.881	1458700	10	8	NbD019576.1;NbD029216.1;NbD035702.1;NbD017483.1;NbD002629.1;NbE05066209.1	NbD019576.1;NbD029216.1;NbD035702.1;NbD017483.1	1460
NaN	NaN	NaN	NaN	NaN	NaN				-1	1	1	1	3	3	3	54.9	0.0010768	7.6716	215780	20	4	NbD019599.1	NbD019599.1	1461
NaN	NaN	NaN	NaN	NaN	NaN				-1	3	3	3	33.5	33.5	33.5	17.476	0	19.334	280950	10	5	NbD038746.1;NbD019612.1	NbD038746.1;NbD019612.1	1462
NaN	NaN	NaN	NaN	NaN	NaN				-1	2	2	2	4.9	4.9	4.9	42.537	0	18.915	138910	22	4	NbE03056091.1;NbD037476.1;NbD019617.1	NbE03056091.1;NbD037476.1;NbD019617.1	1463
18.6053	18.4362	18.4291	18.5426	18.6868	18.5075				-1	9	9	7	23.3	23.3	17.6	57.607	0	72.554	4077300	31	34	NbE03058901.1;NbD019625.1	NbE03058901.1;NbD019625.1	1464
NaN	NaN	NaN	NaN	NaN	NaN				-1	2	2	2	5	5	5	57.561	0.0012315	10.771	57950	26	2	NbD019648.1	NbD019648.1	1465
NaN	17.0487	NaN	17.2097	NaN	NaN				-1	3	3	2	39.7	39.7	39.7	8.8479	0	23.376	606250	4	8	NbE05065398.1;NbD046197.1;NbD019649.1;NbD017004.1	NbE05065398.1;NbD046197.1;NbD019649.1	1466
NaN	NaN	NaN	NaN	NaN	NaN				-1	1	1	1	10.6	10.6	10.6	15.954	0.0016335	6.865	134160	11	3	NbE44070630.1;NbD019651.1;NbE03053873.1	NbE44070630.1;NbD019651.1;NbE03053873.1	1467
NaN	NaN	NaN	NaN	NaN	NaN				-1	2	2	2	5	5	5	63.107	0	13.588	104750	30	4	NbD019673.1	NbD019673.1	1468
15.7539	NaN	15.7101	15.6307	15.6611	15.434				-1	7	7	3	27.5	27.5	11.7	41.913	0	47.394	897520	18	23	NbD019688.1	NbD019688.1	1469
16.1718	NaN	16.0503	NaN	NaN	NaN				-1	2	2	2	11.1	11.1	11.1	38.707	0	17.358	464760	18	8	NbD034674.1;NbD019689.1	NbD034674.1;NbD019689.1	1470
NaN	NaN	NaN	NaN	NaN	NaN				-1	1	1	1	6.7	6.7	6.7	31.004	0.0025494	6.6601	86093	16	3	NbD024085.1;NbD019695.1	NbD024085.1;NbD019695.1	1471
NaN	NaN	NaN	16.625	NaN	16.8478				-1	3	3	3	14.9	14.9	14.9	55.001	0	71.8	665970	24	10	NbD019731.1;NbE44070895.1;NbD044428.1;NbE05064266.1	NbD019731.1;NbE44070895.1;NbD044428.1;NbE05064266.1	1472
17.74	18.3266	17.5135	18.7955	17.93	18.8297				-1	8	8	3	30.4	30.4	13	30.244	0	161.5	4153400	15	30	NbD019734.1;NbD044430.1;NbD019732.1	NbD019734.1;NbD044430.1;NbD019732.1	1473
16.3302	NaN	16.2229	NaN	NaN	NaN				-1	2	2	2	9.2	9.2	9.2	29.356	0	18.024	603100	14	8	NbD019776.1	NbD019776.1	1474
NaN	NaN	NaN	NaN	NaN	NaN				-1	1	1	1	7.8	7.8	7.8	28.931	0.001153	8.4687	150690	13	4	NbD025882.1;NbD019820.1	NbD025882.1;NbD019820.1	1476
NaN	NaN	NaN	NaN	NaN	NaN				-1	4	1	1	3	0.8	0.8	164.68	0.0048751	6.3419	708060	73	4	NbE03058132.1;NbD030119.1;NbD019832.1	NbE03058132.1;NbD030119.1;NbD019832.1	1477
18.1715	17.6689	17.9656	17.5525	17.6641	17.5864				-1	9	9	2	19.9	19.9	4.5	68.042	0	104.41	4199900	41	39	NbD019864.1;NbE03056553.1	NbD019864.1;NbE03056553.1	1478
16.8358	NaN	16.5557	16.3016	16.0745	16.4094				-1	2	2	2	3.6	3.6	3.6	85.841	0	18.045	867190	35	13	NbD019899.1;NbE03055246.1;NbE05064777.1	NbD019899.1;NbE03055246.1;NbE05064777.1	1479
17.4595	17.2219	17.5854	17.8028	17.2332	17.4646				-1	3	3	3	12.4	12.4	12.4	35.502	0	24.964	1605600	15	16	NbD019961.1	NbD019961.1	1480
17.5664	18.2285	17.9594	18.6099	18.1243	18.32				-1	3	3	3	9.1	9.1	9.1	39.619	0	28.989	3725500	18	21	NbD019970.1	NbD019970.1	1481
15.991	NaN	15.8746	NaN	16.004	NaN				-1	3	3	3	5.5	5.5	5.5	102.15	0	27.483	471120	47	10	NbD019973.1	NbD019973.1	1482
16.4888	16.5803	16.455	NaN	NaN	16.4455				-1	4	4	4	14.8	14.8	14.8	38.561	0	28.789	624640	19	11	NbD019974.1	NbD019974.1	1483
17.9882	17.4878	18.1468	18.2367	18.3811	18.2682				-1	18	18	6	28	28	11.5	104.15	0	149.27	6477000	49	66	NbD019980.1	NbD019980.1	1484
NaN	NaN	NaN	NaN	NaN	NaN				-1	3	2	1	10	8	4.4	56.677	0.0012039	9.6402	65092	26	1	NbD020000.1	NbD020000.1	1485
NaN	NaN	NaN	NaN	NaN	NaN				-1	1	1	1	4.7	4.7	4.7	39.987	0.0011038	7.8929	150230	18	3	NbD020001.1;NbE03058816.1;NbD041434.1	NbD020001.1;NbE03058816.1;NbD041434.1	1486
NaN	17.9715	17.7223	18.5194	17.961	18.3951				-1	3	3	3	27	27	27	10.889	0	22.601	2657600	7	14	NbD020037.1	NbD020037.1	1487
NaN	NaN	15.4225	15.9683	15.7073	16.0264				-1	3	3	3	20.3	20.3	20.3	32.641	0	33.602	466030	18	12	NbD047117.1;NbD020051.1	NbD047117.1;NbD020051.1	1488
NaN	NaN	NaN	NaN	NaN	NaN				-1	10	2	2	48.7	10.7	10.7	16.951	0	13.503	211860	7	5	NbD020080.1;NbE05064982.1	NbD020080.1;NbE05064982.1	1489
NaN	NaN	NaN	NaN	NaN	NaN				-1	2	1	1	6.5	4.6	4.6	52.147	0	19.581	289710	23	4	NbE05063391.1;NbD020105.1	NbE05063391.1;NbD020105.1	1490
17.1922	16.8911	17.3107	16.9785	17.1854	16.8033				-1	6	6	1	20.5	20.5	4.2	49.412	0	40.982	1803100	23	22	NbD020138.1	NbD020138.1	1491
NaN	NaN	NaN	NaN	NaN	NaN				-1	2	2	2	9.1	9.1	9.1	40.558	0.00083264	11.256	138470	18	3	NbD020163.1;NbD025340.1	NbD020163.1;NbD025340.1	1492
NaN	NaN	NaN	15.924	15.8434	16.0591				-1	3	3	3	27.4	27.4	27.4	26.413	0	32.341	287800	17	9	NbE03054565.1;NbD042702.1;NbD020241.1	NbE03054565.1;NbD042702.1;NbD020241.1	1493
16.1092	NaN	16.0963	NaN	NaN	NaN				-1	3	3	3	17.2	17.2	17.2	20.504	0	20.537	315150	8	7	NbD051319.1;NbD040675.1;NbD040542.1;NbD020260.1	NbD051319.1;NbD040675.1;NbD040542.1;NbD020260.1	1494
17.1305	16.6641	16.8973	16.491	16.6437	16.2833				-1	9	9	9	16.5	16.5	16.5	103.35	0	78.185	1797300	46	28	NbD020265.1;NbD040564.1	NbD020265.1;NbD040564.1	1495
NaN	NaN	NaN	NaN	NaN	NaN				-1	6	1	1	14.7	4.9	4.9	58.064	0	18.737	242910	26	5	NbD020266.1	NbD020266.1	1496
NaN	NaN	NaN	NaN	NaN	NaN				-1	1	1	1	2.3	2.3	2.3	96.197	0.001127	8.0624	17698	40	2	NbD020335.1	NbD020335.1	1497
NaN	NaN	NaN	NaN	NaN	NaN				-1	4	1	1	27.4	8.5	8.5	25.134	0.0011779	8.9863	99647	10	3	NbD046392.1;NbD039620.1;NbD029212.1;NbD020342.1	NbD046392.1;NbD039620.1;NbD029212.1;NbD020342.1	1498
NaN	NaN	NaN	NaN	NaN	NaN				-1	10	1	1	16.8	2.9	2.9	113.69	0.0046368	6.4239	170050	49	2	NbD020349.1;NbE44071346.1;NbE03053367.1;NbE05062967.1;NbE44071345.1	NbD020349.1;NbE44071346.1;NbE03053367.1;NbE05062967.1;NbE44071345.1	1499
NaN	NaN	NaN	NaN	NaN	NaN				-1	3	3	3	29.9	29.9	29.9	10.415	0	23.235	456460	5	6	NbD046082.1;NbD040717.1;NbD020389.1;NbD036433.1;NbD050772.1	NbD046082.1;NbD040717.1;NbD020389.1;NbD036433.1;NbD050772.1	1500
NaN	NaN	NaN	NaN	NaN	NaN				-1	1	1	1	4.4	4.4	4.4	32.309	0.0044025	6.5413	145920	14	3	NbD046081.1;NbD020390.1;NbD040718.1	NbD046081.1;NbD020390.1;NbD040718.1	1501
21.4701	22.9865	21.4833	22.8557	21.3973	22.9182				-1	50	50	13	69.2	69.2	20.3	71.104	0	323.31	295590000	37	378	NbD031028.1;NbD020434.1;NbE44071750.1;NbE03058635.1;NbD030849.1	NbD031028.1;NbD020434.1;NbE44071750.1;NbE03058635.1	1502
NaN	16.7543	16.7928	16.9952	17.1707	16.9366				-1	7	7	7	18.1	18.1	18.1	58.966	0	49.267	1264900	29	17	NbD020449.1;NbD007438.1	NbD020449.1;NbD007438.1	1503
NaN	NaN	NaN	NaN	NaN	NaN				-1	1	1	1	3.9	3.9	3.9	52.277	0.0088784	6.143	35053	23	3	NbD020494.1;NbE05067433.1	NbD020494.1;NbE05067433.1	1504
NaN	NaN	NaN	NaN	NaN	NaN				-1	2	2	2	4.2	4.2	4.2	57.411	0	20.201	67762	23	2	NbD020503.1;NbE05067393.1	NbD020503.1;NbE05067393.1	1505
18.227	17.3305	18.3757	17.3494	17.6371	NaN				-1	4	4	4	9.3	9.3	9.3	71.98	0	29.502	1936000	35	14	NbD020506.1;NbD051424.1	NbD020506.1;NbD051424.1	1506
NaN	15.404	15.6113	NaN	NaN	15.8215				-1	2	2	2	9.2	9.2	9.2	39.637	0	23.4	366170	14	8	NbD049175.1;NbD020509.1;NbE03062403.1;NbE03062041.1	NbD049175.1;NbD020509.1;NbE03062403.1;NbE03062041.1	1507
NaN	17.4176	17.1077	16.8882	17.1566	17.0252				-1	5	5	5	26.5	26.5	26.5	25.152	0	40.073	1459700	10	18	NbD044523.1;NbD020515.1	NbD044523.1;NbD020515.1	1508
16.1348	17.2047	NaN	16.8753	NaN	17.0043				-1	4	4	4	19.8	19.8	19.8	37.185	0	33.915	1018300	19	11	NbD020521.1	NbD020521.1	1509
17.6127	17.1359	17.542	17.2017	17.6714	17.1718				-1	4	4	4	18.1	18.1	18.1	37.14	0	38.781	1912000	23	17	NbD020530.1;NbE03055049.1;NbD012154.1;NbD012156.1	NbD020530.1;NbE03055049.1;NbD012154.1	1510
15.6962	NaN	15.7954	NaN	NaN	NaN				-1	5	2	2	22	10.3	10.3	39.361	0	16.401	570610	20	8	NbD020546.1;NbE44071421.1	NbD020546.1;NbE44071421.1	1511
NaN	NaN	NaN	NaN	NaN	NaN				-1	1	1	1	4.5	4.5	4.5	49.585	0.0048736	6.3396	22836	23	2	NbE05063040.1;NbE44069932.1;NbD020551.1	NbE05063040.1;NbE44069932.1;NbD020551.1	1512
17.1149	16.5898	17.0614	16.4139	17.137	16.5701				-1	5	5	1	25.4	25.4	6.6	36.259	0	42.944	1734200	15	20	NbD020579.1;NbE44071179.1;NbE44072227.1;NbE05065535.1;NbD008967.1;NbD050937.1;NbE03060984.1;NbD040615.1	NbD020579.1	1513
NaN	NaN	NaN	NaN	NaN	NaN				-1	1	1	1	1.5	1.5	1.5	115.2	0.0011714	8.8394	214490	61	5	NbE44069353.1;NbD047643.1;NbE05065035.1;NbD020620.1	NbE44069353.1;NbD047643.1;NbE05065035.1;NbD020620.1	1514
18.3867	18.197	18.2786	18.362	18.2861	18.2375				-1	35	35	11	39.5	39.5	15	107.8	0	323.31	19511000	47	191	NbD020628.1	NbD020628.1	1515
NaN	NaN	NaN	NaN	17.2001	17.1537				-1	2	2	2	12.2	12.2	12.2	33.825	0	37.519	706830	19	7	NbD020629.1	NbD020629.1	1516
16.2838	17.9075	16.3756	17.3965	16.3037	17.6261				-1	4	4	4	9	9	9	53.582	0	30.092	1800600	22	17	NbD020659.1	NbD020659.1	1517
NaN	16.9798	NaN	NaN	NaN	15.7202				-1	2	2	2	6.4	6.4	6.4	57.099	0	13.92	579630	24	9	NbD020660.1	NbD020660.1	1518
NaN	NaN	NaN	NaN	NaN	NaN				-1	2	2	0	7	7	0	56.896	0	16.446	167860	26	4	NbD020668.1;NbE44073390.1;NbD029351.2;NbD038194.1;NbD048623.1;NbE03056460.1	NbD020668.1;NbE44073390.1;NbD029351.2;NbD038194.1;NbD048623.1;NbE03056460.1	1519
NaN	15.3643	15.6731	NaN	15.8134	15.4395				-1	15	4	4	14.3	4	4	147.82	0	44.59	449080	93	13	NbE05064017.1;NbD020669.1	NbE05064017.1;NbD020669.1	1520
17.7367	17.4997	17.6767	17.3841	17.6203	NaN				-1	3	3	2	17	17	13.5	24.819	0	38.536	1821100	15	12	NbD020688.1	NbD020688.1	1521
NaN	NaN	NaN	NaN	NaN	NaN				-1	1	1	1	1.8	1.8	1.8	123.91	0.001145	8.3158	30699	63	1	NbE03054254.1;NbD023107.1;NbE03055907.1;NbD020699.1	NbE03054254.1;NbD023107.1;NbE03055907.1;NbD020699.1	1522
NaN	NaN	NaN	17.6133	NaN	17.4815				-1	4	4	4	3.8	3.8	3.8	198.68	0	28.722	632000	91	9	NbE05063956.1;NbD020719.1	NbE05063956.1;NbD020719.1	1523
NaN	NaN	15.8515	NaN	NaN	15.866				-1	2	2	2	6.5	6.5	6.5	36.054	0	12.327	556100	16	9	NbE44071449.1;NbE05066517.1;NbD020739.1	NbE44071449.1;NbE05066517.1;NbD020739.1	1524
NaN	NaN	NaN	NaN	NaN	NaN				-1	3	3	3	11.1	11.1	11.1	52.487	0	22.229	377990	23	6	NbE05066252.1;NbD020742.1;NbD035560.1;NbD041594.1	NbE05066252.1;NbD020742.1;NbD035560.1	1525
NaN	NaN	NaN	NaN	NaN	NaN				-1	1	1	1	3.5	3.5	3.5	40.774	0.0041087	6.5735	87682	18	2	NbE03058686.1;NbD020755.1	NbE03058686.1;NbD020755.1	1526
NaN	NaN	NaN	NaN	NaN	NaN				-1	6	6	1	17.3	17.3	5.6	44.882	0	40.072	952330	23	10	NbD020769.1	NbD020769.1	1527
NaN	NaN	NaN	NaN	NaN	NaN				-1	12	2	2	23.1	5.3	5.3	91.149	0	24.42	177950	42	4	NbD020789.1;NbE05068644.1;NbE03058836.1;NbD033661.1	NbD020789.1	1528
NaN	NaN	NaN	NaN	NaN	NaN				-1	1	1	1	1.8	1.8	1.8	87.12	0.0010933	7.8006	41636	37	2	NbE44072823.1;NbD020809.1;NbE03053863.1;NbD033175.1	NbE44072823.1;NbD020809.1;NbE03053863.1;NbD033175.1	1529
NaN	NaN	NaN	NaN	NaN	NaN				-1	1	1	1	4	4	4	36.407	0.0025526	6.6773	64894	20	1	NbE03058001.1;NbE03054146.1;NbD020831.1	NbE03058001.1;NbE03054146.1;NbD020831.1	1530
15.7986	NaN	16.1498	NaN	16.3586	NaN				-1	5	5	5	11	11	11	81.348	0	33.229	475470	38	10	NbD020840.1	NbD020840.1	1531
NaN	NaN	17.4343	17.8989	NaN	18.2405				-1	5	5	3	41.4	41.4	17.8	17.239	0	54.825	1699700	7	14	NbD020850.1;NbE03058187.1	NbD020850.1	1532
NaN	NaN	NaN	NaN	NaN	NaN				-1	2	1	1	20	10.5	10.5	20.224	0.0011966	9.4534	33959	10	1	NbD020858.1	NbD020858.1	1533
17.4323	16.7936	17.6556	18.0438	17.9163	18.0484				-1	7	7	3	24.1	24.1	13	39.692	0	99.127	3466000	18	35	NbD020879.1	NbD020879.1	1534
NaN	NaN	NaN	NaN	NaN	NaN				-1	1	1	1	7.3	7.3	7.3	28.227	0.0012048	9.6568	282390	8	5	NbD020885.1	NbD020885.1	1535
15.122	16.041	15.5194	16.0636	15.7989	16.0696				-1	7	7	7	18.3	18.3	18.3	67.276	0	176.78	1037700	34	30	NbD020892.1	NbD020892.1	1536
NaN	16.3561	16.6467	16.3707	16.2194	16.2051				-1	2	2	1	7.5	7.5	3.1	40.311	0	37.046	611790	17	12	NbE44072664.1;NbD041548.1;NbD040979.1;NbD036782.1;NbD020919.1;NbE03056650.1;NbD018331.1	NbE44072664.1;NbD041548.1;NbD040979.1;NbD036782.1;NbD020919.1;NbE03056650.1;NbD018331.1	1537
NaN	NaN	NaN	NaN	NaN	NaN				-1	2	2	2	15.7	15.7	15.7	13.932	0	14.356	66856	11	4	NbD045575.1;NbE05064881.1;NbD020921.1	NbD045575.1;NbE05064881.1;NbD020921.1	1538
18.2993	17.5486	18.18	17.2641	17.2757	17.396				-1	11	11	9	37	37	30.3	43.701	0	94.547	2463200	21	28	NbE05063320.1;NbD038494.1;NbD020928.1;NbE44071258.1;NbD039740.1;NbE03053748.1;NbD032291.1	NbE05063320.1;NbD038494.1;NbD020928.1;NbE44071258.1;NbD039740.1;NbE03053748.1;NbD032291.1	1539
NaN	NaN	NaN	NaN	NaN	NaN				-1	1	1	1	3.7	3.7	3.7	44.456	0.0010672	7.6436	331970	19	4	NbD049729.1;NbD045995.1;NbD020930.1	NbD049729.1;NbD045995.1;NbD020930.1	1540
NaN	NaN	NaN	NaN	NaN	NaN				-1	2	2	2	8.2	8.2	8.2	35.719	0	11.796	548610	20	6	NbD020932.1;NbE03053860.1;NbD049728.1	NbD020932.1;NbE03053860.1;NbD049728.1	1541
NaN	NaN	NaN	NaN	NaN	NaN				-1	3	3	3	5.3	5.3	5.3	69.784	0	24.321	108380	39	4	NbE05064021.1;NbE44071237.1;NbE44071385.1;NbD046410.1;NbE44071236.1;NbD020939.1	NbE05064021.1;NbE44071237.1;NbE44071385.1;NbD046410.1;NbE44071236.1;NbD020939.1	1542
NaN	NaN	NaN	NaN	NaN	NaN				-1	2	1	1	7	3.1	3.1	53.311	0.004397	6.5356	175880	30	3	NbE05064022.1;NbD020940.1	NbE05064022.1;NbD020940.1	1543
NaN	NaN	NaN	NaN	NaN	NaN				-1	1	1	1	2.9	2.9	2.9	59.763	0.0017544	7.5434	241350	28	4	NbD020945.1	NbD020945.1	1544
17.0592	17.1268	17.1671	17.1626	17.0781	16.8002				-1	3	3	2	8.5	8.5	5.8	59.828	0	98.702	1178100	27	12	NbD045853.1;NbE44070163.1;NbE05064062.1;NbD020960.1	NbD045853.1;NbE44070163.1;NbE05064062.1;NbD020960.1	1545
NaN	NaN	NaN	NaN	NaN	NaN				-1	1	1	1	9.6	9.6	9.6	26.576	0	13.214	209480	6	5	NbD052496.1;NbD020964.1	NbD052496.1;NbD020964.1	1546
17.7623	17.6956	17.5486	17.5793	17.5267	17.4253				-1	20	11	2	41.8	23.9	2.7	60.2	0	83.318	4602500	32	42	NbD020970.1;NbD052760.1	NbD020970.1;NbD052760.1	1547
NaN	NaN	NaN	NaN	NaN	NaN				-1	1	1	1	3.6	3.6	3.6	44.277	0.0010657	7.642	67302	19	2	NbE05066085.1;NbD020974.1	NbE05066085.1;NbD020974.1	1548
17.2292	17.3151	17.4312	17.3079	17.127	17.2054				-1	6	5	5	11.6	9.8	9.8	90.161	0	58.746	1832000	45	20	NbD021021.1	NbD021021.1	1549
NaN	NaN	NaN	NaN	NaN	NaN				-1	2	2	2	2.4	2.4	2.4	148.56	0	12.688	123210	79	2	NbE05066277.1;NbD021028.1;NbE44072988.1;NbD028629.1	NbE05066277.1;NbD021028.1;NbE44072988.1;NbD028629.1	1550
NaN	NaN	NaN	NaN	NaN	NaN				-1	6	1	1	12.1	2.4	2.4	77.651	0.0011169	7.995	37904	35	2	NbE03059651.1;NbD021044.1	NbE03059651.1;NbD021044.1	1551
NaN	NaN	NaN	NaN	NaN	NaN				-1	3	2	2	6.5	3.3	3.3	71.249	0.00083056	11.146	80331	32	2	NbD021046.1	NbD021046.1	1552
16.1594	NaN	15.7182	15.2803	15.4481	15.4865				-1	6	6	2	11.6	11.6	3.2	59.737	0	38.922	684960	33	17	NbD021058.1;NbE03053685.1	NbD021058.1;NbE03053685.1	1553
NaN	NaN	NaN	NaN	NaN	NaN				-1	1	1	1	2.3	2.3	2.3	93.8	0.0080262	6.1741	112640	51	2	NbD021080.1;NbD049924.1	NbD021080.1;NbD049924.1	1554
NaN	17.1815	NaN	17.282	NaN	17.6754				-1	3	3	2	8.2	8.2	6.2	50.706	0	18.985	952060	20	9	NbD029515.1;NbD021082.1	NbD029515.1;NbD021082.1	1555
NaN	NaN	NaN	NaN	NaN	NaN				-1	1	1	1	4.1	4.1	4.1	29.571	0	31.636	439230	11	5	NbD048984.1;NbD021122.1	NbD048984.1;NbD021122.1	1556
19.7915	20.1817	20.8087	21.028	21.1782	21.033				-1	26	4	4	58.7	10.6	10.6	42.588	0	172.3	22323000	22	32	NbD021123.1	NbD021123.1	1557
NaN	NaN	NaN	16.532	16.4033	16.4869				-1	2	2	2	15.5	15.5	15.5	20.346	0	15.921	510100	13	8	NbD029798.1;NbD021130.1	NbD029798.1;NbD021130.1	1558
NaN	16.1669	15.7486	16.2284	15.8215	16.0789				-1	6	6	6	24.2	24.2	24.2	31.495	0	53.388	995710	18	20	NbD021143.1;NbD013406.1	NbD021143.1;NbD013406.1	1559
NaN	NaN	NaN	NaN	NaN	NaN				-1	2	2	2	9.6	9.6	9.6	54.631	0	13.418	240030	26	6	NbD028590.1;NbD021165.1	NbD028590.1;NbD021165.1	1560
NaN	NaN	NaN	NaN	NaN	NaN				-1	1	1	1	5.3	5.3	5.3	50.676	0.005425	6.2897	28407	26	1	NbD021168.1	NbD021168.1	1561
NaN	NaN	NaN	NaN	NaN	NaN				-1	18	2	1	53.6	8.2	3.7	41.708	0.00041929	11.382	496470	21	6	NbD021173.1	NbD021173.1	1562
19.6384	19.3688	19.5105	19.7468	19.2654	19.3952				-1	5	5	5	31.1	31.1	31.1	27.136	0	49.355	7282400	14	28	NbD024597.1;NbD021174.1	NbD024597.1;NbD021174.1	1563
NaN	NaN	NaN	NaN	NaN	NaN				-1	6	1	1	43.4	6	6	25.645	0.0016739	7.1058	302800	14	3	NbD035866.1;NbD021186.1	NbD035866.1;NbD021186.1	1564
NaN	NaN	15.7562	15.6619	15.7508	15.7333				-1	2	2	2	10.7	10.7	10.7	33.824	0	13.764	634560	17	15	NbD021190.1;NbE03056779.1;NbD007463.1;NbE03062269.1	NbD021190.1;NbE03056779.1;NbD007463.1;NbE03062269.1	1565
NaN	NaN	NaN	NaN	NaN	NaN				-1	3	3	3	3.4	3.4	3.4	131.5	0	22.789	439430	54	7	NbE44069489.1;NbD021231.1;NbD049404.1	NbE44069489.1;NbD021231.1;NbD049404.1	1566
16.6754	16.4682	16.4135	16.2095	16.4292	16.1193				-1	6	6	6	17.8	17.8	17.8	56.971	0	41.389	1080400	31	21	NbE05067481.1;NbE03059212.1;NbD051103.1;NbD021239.1	NbE05067481.1;NbE03059212.1;NbD051103.1;NbD021239.1	1567
NaN	NaN	NaN	NaN	NaN	NaN				-1	1	1	1	2	2	2	71.661	0.0043846	6.5097	192650	31	5	NbD021244.1;NbD031640.1;NbE03059564.1	NbD021244.1;NbD031640.1;NbE03059564.1	1568
20.0113	20.2695	20.2745	20.7989	20.4043	20.8106				-1	10	10	1	50.7	50.7	7.9	23.935	0	119.33	11061000	15	33	NbD021245.1	NbD021245.1	1569
NaN	17.5489	NaN	17.7491	17.3106	NaN				-1	8	8	1	8	8	0.9	154.95	0	50.642	1013200	64	15	NbD021265.1	NbD021265.1	1570
15.8565	15.2817	16.3787	15.1074	17.6154	NaN				-1	13	13	5	19	19	5.4	76.588	0	89.605	1639600	31	29	NbD021269.1	NbD021269.1	1571
17.4653	NaN	NaN	17.6284	NaN	NaN				-1	9	1	1	14.8	2	2	98.243	0.0066106	6.2598	613350	44	5	NbE05067016.1;NbD021272.1;NbE03057665.1;NbE44073899.1	NbE05067016.1;NbD021272.1	1572
NaN	NaN	NaN	NaN	NaN	NaN				-1	1	1	1	2.1	2.1	2.1	68.194	0.0016762	7.1153	47875	32	1	NbD021293.1	NbD021293.1	1573
NaN	NaN	NaN	NaN	NaN	NaN				-1	3	3	3	17.2	17.2	17.2	38.7	0	18.841	224710	16	5	NbD021317.1;NbD021318.1	NbD021317.1	1574
15.0251	15.2635	NaN	NaN	NaN	14.9511				-1	4	4	4	4.4	4.4	4.4	173.89	0	27.593	295890	87	10	NbE05068033.1;NbD021344.1;NbE05064855.1;NbE44073190.1;NbD013379.1	NbE05068033.1;NbD021344.1	1575
NaN	NaN	NaN	NaN	NaN	NaN				-1	2	2	2	9.7	9.7	9.7	42.607	0	60.255	1019500	22	7	NbD021363.1	NbD021363.1	1576
16.5399	15.9584	16.7067	NaN	17.1118	NaN				-1	4	4	4	21.5	21.5	21.5	28.063	0	45.819	944150	14	12	NbD021389.1;NbD014985.1	NbD021389.1;NbD014985.1	1577
17.1792	17.9584	16.498	17.981	16.6881	17.7885				-1	9	9	6	40.6	40.6	21.9	25.108	0	111.27	2331000	10	35	NbD042159.1;NbD021396.1	NbD042159.1;NbD021396.1	1578
18.5436	19.1281	18.5443	19.2907	18.8992	NaN				-1	3	2	2	7.6	3.9	3.9	55.069	0	34.281	3785400	27	15	NbD021400.2;NbD021400.1;NbD021399.1	NbD021400.2;NbD021400.1;NbD021399.1	1579
NaN	NaN	17.1799	16.9906	NaN	NaN				-1	13	3	2	36.2	11.3	7.1	36.728	0	28.91	775430	21	11	NbD021416.1	NbD021416.1	1580
17.1044	16.9938	17.5181	17.5377	17.6709	17.6491				-1	8	8	4	19.7	19.7	12.2	49.13	0	78.584	3317300	24	39	NbE03057844.1;NbD040584.1;NbD021432.1	NbE03057844.1;NbD040584.1;NbD021432.1	1581
16.203	NaN	NaN	16.1514	15.9618	NaN				-1	4	4	4	27.2	27.2	27.2	36.196	0	40.78	643090	17	14	NbD021435.1	NbD021435.1	1582
16.8866	17.1825	17.4878	16.9519	17.0803	17.4384				-1	4	4	3	13.1	13.1	10.3	56.185	0	32.231	1385600	33	20	NbD021441.1;NbD039700.1;NbD040957.1	NbD021441.1	1583
17.3761	16.9549	17.4484	16.8522	17.1033	16.7579				-1	18	18	18	17.1	17.1	17.1	166.01	0	144.83	3461700	73	71	NbE05066676.1;NbD021525.1	NbE05066676.1;NbD021525.1	1584
18.3482	18.0713	18.2935	17.3838	17.804	17.7223				-1	9	9	9	19.8	19.8	19.8	63.681	0	100.59	3801800	32	38	NbD021547.1;NbE44069545.1;NbD049605.1	NbD021547.1;NbE44069545.1;NbD049605.1	1585
NaN	NaN	NaN	NaN	NaN	NaN				-1	1	1	1	2.7	2.7	2.7	61.953	0.0010997	7.8559	255660	21	4	NbE03053920.1;NbD052302.1;NbE03056971.1;NbD021595.1	NbE03053920.1;NbD052302.1;NbE03056971.1;NbD021595.1	1586
NaN	NaN	NaN	NaN	NaN	NaN				-1	1	1	1	5.2	5.2	5.2	42.572	0.0017337	7.3893	25376	20	2	NbD048647.1;NbD021604.1	NbD048647.1;NbD021604.1	1587
16.0775	16.5744	16.3904	16.2141	16.1982	16.1861				-1	6	6	6	11.4	11.4	11.4	59.043	0	39.716	1166800	30	22	NbE05065807.1;NbD048646.1;NbD021605.1	NbE05065807.1;NbD048646.1;NbD021605.1	1588
NaN	NaN	NaN	NaN	NaN	NaN				-1	9	2	2	20.2	8.7	8.7	54.76	0	11.713	119070	26	2	NbE05065667.1;NbD021627.1	NbE05065667.1;NbD021627.1	1590
18.4145	18.2741	18.4751	17.9934	18.2432	18.0644				-1	21	21	6	33.2	33.2	8.6	76.046	0	311.65	9121800	37	89	NbD021663.1;NbE05067503.1	NbD021663.1;NbE05067503.1	1591
NaN	NaN	NaN	NaN	NaN	NaN				-1	3	3	2	9.7	9.7	6.5	36.821	0	17.629	140150	13	3	NbD021703.1	NbD021703.1	1592
NaN	NaN	NaN	NaN	NaN	NaN				-1	2	1	1	8.7	3.7	3.7	39.328	0.002551	6.669	417810	16	6	NbD021713.1	NbD021713.1	1593
17.7533	17.8168	17.7079	18.0215	17.7075	18.0003				-1	7	7	5	20.1	20.1	15.3	64.794	0	60.43	3768700	32	35	NbD021724.1	NbD021724.1	1594
NaN	NaN	NaN	NaN	NaN	NaN				-1	1	1	1	2.3	2.3	2.3	47.895	0	13.763	232020	23	4	NbD021738.1	NbD021738.1	1595
NaN	16.0998	NaN	16.984	NaN	NaN				-1	2	2	2	19.9	19.9	19.9	15.142	0	30.716	419950	7	8	NbD021739.1	NbD021739.1	1596
NaN	NaN	NaN	NaN	NaN	NaN				-1	1	1	1	3.6	3.6	3.6	49.792	0.001747	7.5054	73065	23	2	NbD046321.1;NbD021740.1	NbD046321.1;NbD021740.1	1597
NaN	18.4191	17.8276	17.9842	17.7926	NaN				-1	7	7	2	12.7	12.7	5.7	71.595	0	53.706	2338900	23	17	NbD021744.1	NbD021744.1	1598
16.8343	16.938	16.8047	16.9712	16.8653	16.8827				-1	4	4	4	12.3	12.3	12.3	50.514	0	32.339	1904300	29	22	NbD021764.1;NbD038110.1;NbE44070240.1	NbD021764.1;NbD038110.1;NbE44070240.1	1599
NaN	NaN	NaN	NaN	NaN	NaN				-1	4	1	1	19.9	5.8	5.8	33.174	0.0011215	8.0344	28212	14	1	NbD021769.1;NbD021768.1	NbD021769.1;NbD021768.1	1600
NaN	NaN	NaN	NaN	NaN	NaN				-1	19	2	2	19.5	4.1	4.1	130.51	0	14.612	146910	63	4	NbD021777.1	NbD021777.1	1601
NaN	NaN	NaN	NaN	NaN	NaN				-1	3	3	2	6.7	6.7	4.7	65.434	0	17.441	168780	21	4	NbD021785.1	NbD021785.1	1602
17.0538	17.019	16.7801	16.646	16.4071	16.4732				-1	14	14	4	16.4	16.4	3.9	135.05	0	173.22	3531600	65	49	NbD021794.1	NbD021794.1	1603
NaN	NaN	NaN	NaN	NaN	NaN				-1	1	1	1	3	3	3	48.895	0.004899	6.3589	370870	27	4	NbD028782.1;NbE44073289.1;NbD021801.1	NbD028782.1;NbE44073289.1;NbD021801.1	1604
NaN	NaN	NaN	17.7609	17.1784	NaN				-1	3	3	2	16.4	16.4	8.4	29.892	0	57.916	1240400	17	9	NbD021804.1;NbD021805.1	NbD021804.1;NbD021805.1	1605
NaN	NaN	NaN	NaN	NaN	NaN				-1	2	2	1	13.2	13.2	6	29.732	0.0012126	10.007	191270	13	3	NbD021815.1	NbD021815.1	1606
NaN	NaN	15.3585	NaN	NaN	15.5484				-1	2	2	2	6.9	6.9	6.9	50.042	0	19.769	349000	25	8	NbE05067470.1;NbD021828.1	NbE05067470.1;NbD021828.1	1607
17.2838	16.8838	17.1856	16.5284	16.4453	16.5007				-1	5	5	3	26.5	26.5	16.2	25.36	0	40.305	1361500	8	16	NbD021855.1;NbD002830.1;NbD039685.1;NbE05063668.1	NbD021855.1;NbD002830.1	1608
NaN	NaN	NaN	NaN	NaN	NaN				-1	2	2	2	14.2	14.2	14.2	31.07	0	15.693	252650	16	5	NbD021872.1	NbD021872.1	1609
18.543	19.1188	NaN	18.8134	18.0889	18.7186				-1	4	2	2	23.5	11.5	11.5	29.356	0	17.015	3078300	16	15	NbD021873.1	NbD021873.1	1610
NaN	NaN	NaN	NaN	NaN	NaN				-1	1	1	1	6	6	6	35.415	0.0011742	8.922	141890	15	3	NbD021885.1	NbD021885.1	1611
NaN	NaN	NaN	NaN	NaN	NaN				-1	3	3	3	10.8	10.8	10.8	64.647	0	19.373	143510	25	6	NbD021934.1;NbE03053737.1;NbE44070137.1	NbD021934.1	1612
NaN	17.8628	NaN	17.8289	NaN	17.796				-1	16	16	16	10.2	10.2	10.2	219.8	0	123.2	3069000	112	37	NbE44070891.1;NbE05067221.1;NbD021939.1;NbD036437.1;NbE05062901.1	NbE44070891.1;NbE05067221.1;NbD021939.1;NbD036437.1;NbE05062901.1	1613
15.8534	15.5468	15.9543	NaN	NaN	NaN				-1	5	5	5	5.4	5.4	5.4	135.29	0	38.406	508870	54	14	NbD021963.1;NbE03060921.1;NbD004385.1	NbD021963.1;NbE03060921.1;NbD004385.1	1614
NaN	NaN	NaN	NaN	NaN	NaN				-1	1	1	1	2.9	2.9	2.9	59.799	0.0080095	6.1593	35490	28	2	NbD021974.1	NbD021974.1	1615
NaN	NaN	NaN	NaN	NaN	NaN				-1	1	1	1	3.3	3.3	3.3	44.677	0.0011499	8.4082	88254	10	2	NbE44073602.1;NbD038272.1;NbD021980.1	NbE44073602.1;NbD038272.1;NbD021980.1	1616
17.3336	17.571	17.1379	17.5498	17.1237	17.4077				-1	6	6	6	22	22	22	31.303	0	48.241	3014300	13	33	NbD021996.1	NbD021996.1	1617
NaN	NaN	NaN	NaN	NaN	NaN				-1	5	1	1	37.1	6.3	6.3	23.978	0.0016706	7.0784	128370	13	5	NbE05063131.1;NbD022003.1	NbE05063131.1;NbD022003.1	1618
NaN	NaN	NaN	NaN	NaN	NaN				-1	1	1	1	3.9	3.9	3.9	56.449	0.0016207	6.8108	298640	23	6	NbD022011.1	NbD022011.1	1619
NaN	NaN	16.7094	NaN	17.149	16.1583				-1	4	4	4	34.1	34.1	34.1	23.035	0	41.287	1025100	12	12	NbD022039.1;NbD008579.1;NbD029270.1	NbD022039.1;NbD008579.1	1620
NaN	NaN	NaN	NaN	NaN	NaN				-1	1	1	1	2.3	2.3	2.3	54.245	0.0054381	6.2956	110550	19	1	NbD047727.1;NbD022067.1	NbD047727.1;NbD022067.1	1621
16.2927	16.0809	16.1896	NaN	16.1907	16.1456				-1	1	1	1	4.9	4.9	4.9	25.224	0.0025518	6.6717	626290	10	11	NbD022120.1	NbD022120.1	1622
NaN	NaN	NaN	NaN	NaN	NaN				-1	7	2	2	28.2	11.6	11.6	29.927	0	27.785	531830	14	6	NbD022222.1;NbD040551.1	NbD022222.1;NbD040551.1	1624
20.8498	20.4426	20.6742	20.9937	21.0483	20.81				-1	5	5	4	29.9	29.9	23.8	27.521	0	96.534	18966000	10	29	NbD022229.1;NbE05063168.1	NbD022229.1	1625
19.4824	19.7429	19.4526	19.589	19.4163	19.6063				-1	8	8	6	46.9	46.9	35	24.378	0	290.98	16781000	14	59	NbD022240.1	NbD022240.1	1626
NaN	NaN	NaN	NaN	NaN	NaN				-1	1	1	1	10.3	10.3	10.3	23.248	0.004893	6.3559	71731	14	2	NbE05065602.1;NbD025395.1;NbD022264.1	NbE05065602.1;NbD025395.1;NbD022264.1	1627
NaN	NaN	NaN	NaN	NaN	NaN				-1	3	1	1	28.1	11.7	11.7	18.545	0.0074895	6.224	46172	11	3	NbD022273.1	NbD022273.1	1628
21.1932	22.5415	21.7946	22.2364	21.8617	22.1957				-1	17	8	6	46.7	17.5	13.2	37.189	0	323.31	40255000	17	52	NbD022316.1	NbD022316.1	1629
NaN	NaN	NaN	NaN	NaN	NaN				-1	2	1	1	10.1	7.3	7.3	27.922	0.0046168	6.3958	27282	12	1	NbD022346.1	NbD022346.1	1630
NaN	NaN	NaN	NaN	NaN	NaN				-1	3	1	1	19.2	6	6	29.804	0.0016628	7.0259	23491	15	1	NbD022369.1	NbD022369.1	1631
NaN	NaN	NaN	NaN	NaN	NaN				-1	2	1	1	2.8	1.5	1.5	94.937	0.004908	6.3708	20265	43	1	NbD022378.1;NbE03054918.1	NbD022378.1;NbE03054918.1	1632
15.7936	16.4536	15.5147	16.0356	15.7697	16.2983				-1	15	3	3	19.6	5	5	83.749	0	31.533	817350	47	16	NbD022380.1	NbD022380.1	1633
NaN	NaN	NaN	NaN	NaN	NaN				-1	1	1	1	10.5	10.5	10.5	16.885	0.0010695	7.6563	115950	12	4	NbD031954.1;NbD022388.1	NbD031954.1;NbD022388.1	1634
NaN	NaN	NaN	NaN	NaN	NaN				-1	2	2	2	13.9	13.9	13.9	27.01	0	16.239	158000	13	3	NbD022392.1;NbD025664.1	NbD022392.1;NbD025664.1	1635
18.2532	NaN	18.228	NaN	17.9948	NaN				-1	16	6	1	45.9	19.1	4.6	43.263	0	54.06	2269400	21	14	NbD022422.1	NbD022422.1	1636
NaN	17.3334	16.5071	16.6545	16.2673	16.5651				-1	6	6	6	20.3	20.3	20.3	48.454	0	73.748	1264000	26	15	NbD034213.1;NbD022448.1;NbE05066899.1;NbD052132.1;NbD000864.1;NbD029785.1	NbD034213.1;NbD022448.1;NbE05066899.1	1637
NaN	15.9376	16.4881	16.1198	16.2931	16.2893				-1	26	6	6	63.2	24.9	24.9	42.144	0	57.135	1104100	23	19	NbD022460.1	NbD022460.1	1638
NaN	NaN	NaN	NaN	NaN	NaN				-1	2	2	1	13.1	13.1	7.2	34.96	0.001221	10.367	116850	19	2	NbD022480.1;NbE03059878.1;NbD017258.1	NbD022480.1;NbE03059878.1;NbD017258.1	1639
NaN	NaN	17.1186	NaN	17.5353	NaN				-1	24	2	1	32.5	4.3	3	73.427	0	74.817	1158100	30	8	NbD022492.1;NbE03060328.1	NbD022492.1;NbE03060328.1	1640
NaN	NaN	NaN	NaN	NaN	NaN				-1	9	1	1	13.3	1.2	1.2	71.882	0.0041009	6.5648	527170	35	3	NbD022525.1;NbE44074176.1	NbD022525.1;NbE44074176.1	1641
NaN	NaN	NaN	NaN	NaN	NaN				-1	1	1	1	11.5	11.5	11.5	14.614	0	16.459	452370	6	5	NbD022567.1;NbD032434.1	NbD022567.1;NbD032434.1	1642
20.4959	20.2695	20.3168	20.0654	20.1986	20.0329				-1	22	17	2	34.3	28.1	5.3	47.948	0	323.31	19685000	27	76	NbD022568.1	NbD022568.1	1643
NaN	16.57	NaN	16.7365	NaN	16.5065				-1	7	7	7	10.7	10.7	10.7	99.894	0	55.819	1049400	55	18	NbD022579.1	NbD022579.1	1644
17.8447	17.4872	17.6109	17.5343	17.1777	17.0955				-1	12	12	3	18.3	18.3	4.6	115.33	0	114.33	2568600	48	35	NbD022604.1;NbE05062968.1	NbD022604.1;NbE05062968.1	1646
14.9292	NaN	15.3943	14.5084	NaN	NaN				-1	2	2	2	4.2	4.2	4.2	61.213	0	18.638	261560	42	9	NbD022620.1;NbE44074450.1;NbE44072690.1;NbE03057619.1;NbD030932.1	NbD022620.1;NbE44074450.1;NbE44072690.1;NbE03057619.1;NbD030932.1	1647
NaN	NaN	NaN	NaN	NaN	NaN				-1	1	1	1	6	6	6	31.834	0.0088705	6.14	6778.1	12	1	NbD022646.1	NbD022646.1	1648
18.8168	18.6616	18.873	18.9237	18.8804	18.7171				-1	5	5	5	20.6	20.6	20.6	39.534	0	44.101	5102000	20	37	NbD022660.1	NbD022660.1	1649
15.9152	NaN	15.5088	15.7574	NaN	NaN				-1	3	3	3	3.6	3.6	3.6	147.29	0	21.915	421740	65	10	NbD022668.1;NbD042591.1;NbE03057547.1;NbE05068001.1;NbE05067515.1;NbD019631.1	NbD022668.1;NbD042591.1;NbE03057547.1;NbE05068001.1;NbE05067515.1;NbD019631.1	1650
16.8424	16.2853	16.7773	16.5415	17.0033	16.6234				-1	4	4	4	15.9	15.9	15.9	37.054	0	38.288	1255600	17	23	NbD023182.1;NbD022680.1	NbD023182.1;NbD022680.1	1651
15.5632	NaN	15.6278	NaN	15.6799	NaN				-1	4	4	4	16.8	16.8	16.8	37.702	0	34.53	382740	19	10	NbD022682.1;NbE44072709.1;NbD023184.1	NbD022682.1;NbE44072709.1;NbD023184.1	1652
NaN	NaN	NaN	NaN	NaN	NaN				-1	2	2	2	8.3	8.3	8.3	43.7	0	24.615	181120	19	5	NbD022738.1	NbD022738.1	1653
NaN	NaN	NaN	NaN	NaN	NaN				-1	2	2	1	7.7	7.7	4.2	54.041	0.0011895	9.1825	54712	25	1	NbE05063257.1;NbD047491.1;NbD022744.1	NbE05063257.1;NbD047491.1;NbD022744.1	1654
NaN	NaN	NaN	NaN	NaN	NaN				-1	1	1	1	10.1	10.1	10.1	11.666	0.0043873	6.5117	87044	4	2	NbE44070401.1;NbE44069082.1;NbD022789.1;NbE05068108.1	NbE44070401.1;NbE44069082.1;NbD022789.1;NbE05068108.1	1655
NaN	NaN	15.0573	NaN	15.0225	NaN				-1	2	2	2	2.1	2.1	2.1	173.47	0	27.834	111640	84	5	NbD022790.1;NbE05067401.1;NbE44069752.1	NbD022790.1;NbE05067401.1;NbE44069752.1	1656
NaN	NaN	NaN	NaN	NaN	NaN				-1	2	1	1	9.5	6	6	35.889	0.0017259	7.3436	54090	19	1	NbD048777.1;NbE44071423.1;NbE44074594.1;NbD022798.1	NbD048777.1;NbE44071423.1;NbE44074594.1;NbD022798.1	1657
17.2388	NaN	NaN	NaN	17.3369	NaN				-1	3	2	2	7.4	5.2	5.2	64.096	0	13.848	575530	25	7	NbE05067100.1;NbD022806.1;NbD032787.1;NbD002016.1	NbE05067100.1;NbD022806.1	1658
NaN	NaN	NaN	NaN	NaN	NaN				-1	4	4	4	13.9	13.9	13.9	50.39	0	27.155	356950	29	11	NbD022809.1;NbE05067099.1	NbD022809.1;NbE05067099.1	1659
NaN	NaN	17.6196	NaN	17.3926	NaN				-1	6	6	5	14.7	14.7	12.5	56.918	0	61.566	987180	28	13	NbD022839.1	NbD022839.1	1660
NaN	17.1818	16.3244	17.3223	16.4178	17.1917				-1	4	4	4	6.4	6.4	6.4	105.99	0	91.484	1480400	37	16	NbD022845.1;NbE44071428.1;NbD011289.1;NbE05067068.1;NbD022843.1;NbE05067556.1;NbE44069707.1;NbE44069296.1;NbE05065631.1;NbD020802.1;NbD007977.1	NbD022845.1;NbE44071428.1;NbD011289.1;NbE05067068.1;NbD022843.1;NbE05067556.1;NbE44069707.1	1661
16.1023	16.9432	16.3381	16.6923	16.1538	16.9258				-1	11	11	3	13.6	13.6	2.4	107.28	0	78.866	2530600	39	40	NbE03060536.1;NbD022846.1	NbE03060536.1;NbD022846.1	1662
18.9084	18.436	18.7805	NaN	19.07	18.6007				-1	9	9	9	17.7	17.7	17.7	66.713	0	68.808	4110700	35	23	NbD022849.1;NbD027495.1	NbD022849.1;NbD027495.1	1663
19.879	19.8314	19.8135	19.7083	19.6885	19.6231				-1	21	21	12	41.6	41.6	24	61.29	0	272.63	16030000	34	86	NbD022859.1	NbD022859.1	1664
NaN	NaN	NaN	NaN	NaN	NaN				-1	5	1	1	35.6	5.4	5.4	23.316	0.0054282	6.2909	163410	12	3	NbD022902.1	NbD022902.1	1665
NaN	NaN	16.4107	NaN	16.1286	NaN				-1	3	3	3	5	5	5	105.36	0	24.744	307200	38	6	NbD022930.1;NbE03058498.1;NbD044415.1	NbD022930.1;NbE03058498.1;NbD044415.1	1666
NaN	NaN	NaN	NaN	NaN	NaN				-1	3	3	3	8.6	8.6	8.6	61.179	0	18.621	146940	25	4	NbD022932.1;NbE44070905.1;NbD044414.1	NbD022932.1;NbE44070905.1;NbD044414.1	1667
17.5262	NaN	17.0752	16.7965	17.2467	NaN				-1	10	10	8	15.3	15.3	14	108.01	0	84.238	1402600	40	19	NbD022941.1;NbD048978.1	NbD022941.1;NbD048978.1	1668
NaN	NaN	NaN	NaN	NaN	NaN				-1	2	1	1	13	7.8	7.8	25.443	0.008881	6.1468	42350	12	1	NbD022944.1;NbE44071691.1;NbD014989.1	NbD022944.1;NbE44071691.1;NbD014989.1	1669
NaN	NaN	NaN	NaN	NaN	NaN				-1	3	1	1	16.3	5.7	5.7	33.185	0.0038071	6.6086	42845	20	1	NbD022945.1;NbE05067612.1	NbD022945.1;NbE05067612.1	1670
NaN	NaN	NaN	NaN	NaN	NaN				-1	1	1	1	4	4	4	47.119	0	12.374	73513	24	6	NbD032040.1;NbD022976.1	NbD032040.1;NbD022976.1	1671
16.1935	15.8546	15.9811	15.7746	15.7628	NaN				-1	5	5	3	15.9	15.9	10.6	47.901	0	38.376	673040	20	18	NbD022982.1	NbD022982.1	1672
NaN	NaN	NaN	NaN	NaN	NaN				-1	1	1	1	4.7	4.7	4.7	40.121	0.0091499	6.1299	74208	13	3	NbE05065788.1;NbE44073368.1;NbD022994.1	NbE05065788.1;NbE44073368.1;NbD022994.1	1673
NaN	NaN	NaN	NaN	NaN	NaN				-1	1	1	1	4.7	4.7	4.7	18.523	0.0054414	6.2987	353370	6	5	NbD044479.1;NbD023118.1	NbD044479.1;NbD023118.1	1674
NaN	NaN	NaN	15.8723	15.8184	15.6439				-1	3	3	3	16	16	16	46.033	0	26.84	435340	24	10	NbD023186.1;NbE05065766.1;NbE44072980.1	NbD023186.1;NbE05065766.1	1675
15.6305	NaN	15.714	NaN	16.119	NaN				-1	8	8	8	8.6	8.6	8.6	137.71	0	64.067	549000	66	13	NbD023190.1	NbD023190.1	1676
NaN	NaN	NaN	NaN	NaN	NaN				-1	2	2	2	6.1	6.1	6.1	63.114	0	12.607	37224	26	2	NbD023194.1;NbD037993.1	NbD023194.1;NbD037993.1	1677
NaN	NaN	NaN	NaN	NaN	NaN				-1	2	2	2	5.5	5.5	5.5	58.057	0	12.973	175560	30	3	NbD023242.1;NbE44070573.1	NbD023242.1;NbE44070573.1	1678
NaN	NaN	NaN	NaN	NaN	NaN				-1	4	1	1	54.5	18.2	18.2	12.966	0	12.113	302620	6	6	NbD023250.1;NbE03056665.1	NbD023250.1;NbE03056665.1	1679
NaN	NaN	NaN	NaN	NaN	NaN				-1	3	3	2	2.9	2.9	2.2	171.69	0	21.393	212280	81	4	NbE03055853.1;NbD028023.1;NbD023254.1;NbE44071183.1;NbD014720.1;NbE03054353.1;NbD047591.1	NbE03055853.1;NbD028023.1;NbD023254.1	1680
18.9228	19.0105	18.68	18.5474	18.5076	18.2131				-1	6	6	5	13.5	13.5	10.3	40.696	0	46.065	4101500	20	22	NbE03055596.1;NbD023260.1	NbE03055596.1;NbD023260.1	1681
NaN	NaN	NaN	NaN	NaN	NaN				-1	2	2	2	11.1	11.1	11.1	41.905	0	13.389	690460	15	7	NbD023264.1	NbD023264.1	1682
15.4857	NaN	15.5663	NaN	16.1453	NaN				-1	2	2	1	25.7	25.7	14	14.995	0	18.417	269760	8	9	NbD023275.1	NbD023275.1	1683
19.2714	18.3278	19.1092	17.9757	18.7173	17.8272				-1	7	7	2	40.7	40.7	13.9	23.983	0	58.361	5621100	16	37	NbD023330.1;NbD044669.1	NbD023330.1;NbD044669.1	1684
NaN	NaN	NaN	NaN	NaN	NaN				-1	1	1	1	7.4	7.4	7.4	35.751	0.0011933	9.3071	96316	13	2	NbD023339.1	NbD023339.1	1685
16.4791	NaN	16.4756	16.5531	16.9408	16.5786				-1	4	4	4	15.1	15.1	15.1	43.613	0	37.266	1265800	16	16	NbE44071192.1;NbD033140.1;NbD023341.1	NbE44071192.1;NbD033140.1;NbD023341.1	1686
17.0498	17.6528	17.5294	17.7791	17.7273	17.9571				-1	6	6	1	40.4	40.4	9.9	22.395	0	54.438	3301200	14	26	NbD023353.1;NbE05065239.1	NbD023353.1;NbE05065239.1	1687
NaN	NaN	NaN	NaN	NaN	NaN				-1	4	1	1	17.8	4.7	4.7	30.561	0.0016529	6.9518	122630	18	1	NbD023390.1;NbD035744.1	NbD023390.1	1688
16.7668	17.9777	17.103	17.6276	16.7606	NaN				-1	5	5	5	9.3	9.3	9.3	47.278	0	47.076	1474600	24	16	NbE44071954.1;NbD023408.1	NbE44071954.1;NbD023408.1	1689
16.5388	16.6843	NaN	NaN	15.9809	NaN				-1	4	4	4	20.7	20.7	20.7	30.833	0	31.197	633940	17	12	NbD023417.1;NbD025229.1	NbD023417.1;NbD025229.1	1690
NaN	NaN	NaN	NaN	NaN	NaN				-1	2	2	2	2.3	2.3	2.3	125.88	0	11.871	1290700	62	4	NbE03054993.1;NbD026491.1;NbD023438.1	NbE03054993.1;NbD026491.1;NbD023438.1	1691
NaN	NaN	NaN	NaN	NaN	NaN				-1	2	2	2	3.2	3.2	3.2	91.633	0	13.003	70661	40	2	NbD023440.1	NbD023440.1	1692
NaN	NaN	NaN	NaN	NaN	NaN				-1	4	1	1	6.3	2.2	2.2	91.193	0.0011381	8.2453	54532	44	1	NbD023502.1	NbD023502.1	1693
NaN	NaN	NaN	NaN	NaN	NaN				-1	3	3	3	10.2	10.2	10.2	52.299	0	19.091	167720	24	4	NbD023503.1	NbD023503.1	1694
NaN	NaN	NaN	NaN	NaN	NaN				-1	5	5	5	9.9	9.9	9.9	92.3	0	33.513	379240	46	9	NbD023509.1	NbD023509.1	1695
NaN	NaN	NaN	NaN	NaN	NaN				-1	1	1	1	7.5	7.5	7.5	15.539	0.0074873	6.2227	26127	7	1	NbE03061440.1;NbD049751.1;NbD023512.1	NbE03061440.1;NbD049751.1;NbD023512.1	1696
18.1862	17.8064	18.2642	17.866	18.2364	17.7972				-1	19	19	3	39.4	39.4	5.5	65.219	0	212.26	7496900	36	76	NbE44071324.1;NbD023587.1	NbE44071324.1;NbD023587.1	1697
NaN	NaN	NaN	NaN	NaN	NaN				-1	4	2	2	16.5	9.4	9.4	43.867	0	19.313	455690	22	6	NbD023596.1	NbD023596.1	1698
NaN	NaN	NaN	NaN	NaN	NaN				-1	8	1	1	40.7	6.3	6.3	28.733	0	31.292	257350	14	4	NbD023599.1	NbD023599.1	1699
NaN	NaN	NaN	NaN	NaN	NaN				-1	1	1	1	4.3	4.3	4.3	34.135	0.0074716	6.2085	35625	22	1	NbD023604.1	NbD023604.1	1700
NaN	NaN	NaN	NaN	NaN	NaN				-1	5	5	4	61	61	42	10.981	0	45.214	677240	5	7	NbD024925.1;NbD023613.1	NbD024925.1;NbD023613.1	1701
NaN	NaN	NaN	NaN	NaN	NaN				-1	3	1	1	8.6	3.5	3.5	57.19	0.001165	8.7546	53376	24	1	NbD023620.1	NbD023620.1	1702
NaN	NaN	15.7779	NaN	15.1561	15.5451				-1	4	4	1	19.4	19.4	4.1	26.599	0	30.442	388030	14	11	NbD023648.1	NbD023648.1	1703
NaN	NaN	NaN	NaN	NaN	NaN				-1	2	1	1	12	5.6	5.6	25.895	0.0010973	7.8394	913810	14	6	NbD023656.1	NbD023656.1	1704
NaN	NaN	NaN	NaN	NaN	NaN				-1	2	1	1	19	13.3	13.3	18.425	0.0011696	8.8337	119630	9	4	NbD023675.1	NbD023675.1	1705
16.8782	16.414	16.9146	16.1668	16.4773	16.0166				-1	5	5	3	19.5	19.5	15.2	38.961	0	43.78	1695100	17	28	NbD023707.1;NbE05064297.1	NbD023707.1;NbE05064297.1	1706
NaN	NaN	NaN	NaN	NaN	NaN				-1	9	1	1	21.1	2.6	2.6	47.568	0.0046613	6.4632	73752	18	1	NbD023708.1	NbD023708.1	1707
16.9665	16.9866	16.9287	16.6953	16.9264	16.5276				-1	15	13	4	24.2	20.8	8.4	91.374	0	95.478	2496100	50	40	NbD023745.1;NbE03058381.1	NbD023745.1	1708
16.864	16.2012	NaN	16.6777	16.8638	16.5898				-1	3	3	3	7.7	7.7	7.7	45.488	0	22.665	1008800	22	12	NbD023747.1	NbD023747.1	1709
NaN	NaN	NaN	NaN	NaN	NaN				-1	1	1	1	2	2	2	72.053	0.0016644	7.0337	204570	34	4	NbD023764.1	NbD023764.1	1710
18.4597	18.2828	17.8624	18.6161	18.2532	18.5096				-1	6	6	6	30.6	30.6	30.6	19.956	0	41.611	3937800	9	28	NbD043634.1;NbD023779.1	NbD043634.1;NbD023779.1	1711
NaN	NaN	NaN	NaN	NaN	NaN				-1	1	1	1	2.2	2.2	2.2	85.052	0.0043709	6.4923	25032	26	1	NbE05066047.1;NbD023782.1;NbE05064320.1;NbE44069323.1;NbE44071920.1;NbD047466.1	NbE05066047.1;NbD023782.1;NbE05064320.1;NbE44069323.1;NbE44071920.1;NbD047466.1	1712
NaN	NaN	NaN	NaN	16.3041	16.2003				-1	6	6	6	21.6	21.6	21.6	31.539	0	40.835	710080	12	12	NbD052966.1;NbD023785.1	NbD052966.1;NbD023785.1	1713
NaN	NaN	NaN	16.5932	16.6465	16.5534				-1	8	2	2	28.3	8.3	8.3	50.188	0	26.911	835140	21	9	NbD023815.1;NbD037896.1	NbD023815.1;NbD037896.1	1715
18.8398	NaN	18.9766	NaN	NaN	NaN				-1	3	3	3	11.3	11.3	11.3	43.727	0	35.496	3342100	22	10	NbD023822.1;NbD001220.1;NbE44071252.1;NbE03055491.1;NbD038898.1;NbD010155.1	NbD023822.1;NbD001220.1;NbE44071252.1	1716
NaN	NaN	NaN	NaN	NaN	NaN				-1	1	1	1	4.5	4.5	4.5	53.546	0.0038059	6.6056	37420	23	1	NbE03058382.1;NbD023828.1	NbE03058382.1;NbD023828.1	1717
17.1133	17.6322	NaN	17.5171	17.2038	17.3471				-1	7	7	7	26.8	26.8	26.8	42.908	0	71.132	2051900	15	22	NbE44074440.1;NbE03059467.1;NbD023862.1;NbD008562.1	NbE44074440.1;NbE03059467.1;NbD023862.1;NbD008562.1	1718
NaN	NaN	NaN	NaN	NaN	NaN				-1	2	2	2	4.3	4.3	4.3	54.692	0	13.007	232700	23	3	NbD023886.1;NbE03058411.1;NbD038240.1	NbD023886.1;NbE03058411.1;NbD038240.1	1719
NaN	NaN	NaN	NaN	NaN	NaN				-1	2	2	2	5.8	5.8	5.8	71.155	0	23.784	157900	28	6	NbD023888.1;NbE05063269.1;NbE44069726.1;NbD038238.1	NbD023888.1;NbE05063269.1;NbE44069726.1;NbD038238.1	1720
18.9304	18.5275	18.4628	18.3621	18.3728	18.0729				-1	32	1	1	47.7	5.1	5.1	73.217	0	103.82	3977200	37	13	NbD023909.1	NbD023909.1	1721
NaN	NaN	NaN	15.7216	NaN	16.2797				-1	5	2	2	10.8	6.5	6.5	64.715	0	15.785	299990	29	7	NbD036232.1;NbD023922.1	NbD036232.1;NbD023922.1	1722
NaN	NaN	NaN	NaN	NaN	NaN				-1	10	3	3	34.4	14.3	14.3	46.784	0	27.515	365590	18	7	NbD023924.1;NbD028389.1	NbD023924.1;NbD028389.1	1723
NaN	NaN	NaN	NaN	NaN	NaN				-1	3	3	1	7.7	7.7	2.8	73.796	0	26.776	706100	35	6	NbD023926.1;NbD028388.1	NbD023926.1;NbD028388.1	1724
NaN	NaN	16.8984	NaN	16.7116	16.6519				-1	2	2	2	11	11	11	25.605	0	18.262	680990	11	9	NbD023936.1	NbD023936.1	1725
16.0555	15.7156	16.186	15.8322	15.8624	16.1253				-1	5	3	3	11.5	9.2	9.2	59.007	0	25.902	695380	25	14	NbD023960.1;NbE05064296.1;NbD023705.1	NbD023960.1;NbE05064296.1;NbD023705.1	1726
NaN	NaN	NaN	NaN	NaN	NaN				-1	4	2	2	15.2	10.8	10.8	38.908	0	13.602	200220	17	5	NbD023961.1;NbE44072488.1	NbD023961.1;NbE44072488.1	1727
NaN	NaN	NaN	NaN	NaN	NaN				-1	4	4	4	3.6	3.6	3.6	182.99	0	36.827	214460	73	5	NbD023977.1;NbE03053520.1;NbD033441.1;NbE05062740.1	NbD023977.1;NbE03053520.1	1728
19.9863	19.8915	20.007	19.833	19.9584	19.9276				-1	29	29	23	45.9	45.9	40.4	63.115	0	323.31	24553000	35	104	NbD043334.1;NbD023987.1	NbD043334.1;NbD023987.1	1729
18.9691	NaN	18.5996	NaN	18.3004	NaN				-1	3	3	3	10.1	10.1	10.1	55.252	0	33.862	1530200	23	7	NbD023989.1	NbD023989.1	1730
NaN	16.4757	16.4572	NaN	16.2327	15.9392				-1	5	4	4	21.2	16.8	16.8	31.321	0	33.26	852960	18	15	NbD023995.1;NbE44072091.1;NbD005157.1	NbD023995.1;NbE44072091.1;NbD005157.1	1731
NaN	17.6641	16.4315	17.5	16.3801	17.9084				-1	6	6	5	8.1	8.1	7.3	123.18	0	51.016	1853400	51	21	NbD023997.1;NbE03055153.1;NbD005155.1	NbD023997.1;NbE03055153.1;NbD005155.1	1733
17.3426	16.2165	17.2132	16.2414	16.768	16.0798				-1	19	4	4	33.4	8.7	8.7	75.976	0	42.666	1405200	35	19	NbD024028.1	NbD024028.1	1734
NaN	NaN	NaN	16.4382	NaN	16.2252				-1	6	6	5	15.5	15.5	15.5	58.322	0	36.622	683350	32	10	NbD024034.1;NbE44073827.1;NbD002798.1	NbD024034.1;NbE44073827.1	1735
20.912	20.754	20.8733	20.6438	20.7987	20.5225				-1	20	20	2	55.7	55.7	10.3	41.757	0	323.31	61879000	21	155	NbD052248.1;NbD024063.1	NbD052248.1;NbD024063.1	1736
NaN	NaN	NaN	NaN	NaN	NaN				-1	2	1	1	8.7	4.1	4.1	38.953	0.00467	6.4688	16585	22	1	NbE03055815.1;NbD024073.1	NbE03055815.1;NbD024073.1	1737
NaN	NaN	NaN	NaN	NaN	NaN				-1	3	1	1	2.5	1.7	1.7	161.78	0.0019175	6.696	218140	65	5	NbD024158.1	NbD024158.1	1738
NaN	NaN	NaN	NaN	NaN	NaN				-1	4	4	4	5.7	5.7	5.7	116.88	0	23.246	224890	58	7	NbE03053493.1;NbD024170.1;NbE03056733.1;NbD033109.1;NbD047486.1;NbE03054899.1;NbD022748.1	NbE03053493.1;NbD024170.1;NbE03056733.1;NbD033109.1;NbD047486.1;NbE03054899.1;NbD022748.1	1739
NaN	17.1548	NaN	16.6921	NaN	16.6563				-1	4	4	4	10.8	10.8	10.8	59.656	0	27.382	810170	29	11	NbD024229.1;NbE03058726.1;NbD040166.1	NbD024229.1;NbE03058726.1;NbD040166.1	1740
NaN	NaN	NaN	NaN	NaN	NaN				-1	1	1	1	4.8	4.8	4.8	28.174	0.0019163	6.6903	43075	10	2	NbD027974.1;NbD024236.1	NbD027974.1;NbD024236.1	1741
16.6256	16.1493	16.6444	16.3427	NaN	NaN				-1	2	2	2	7.2	7.2	7.2	35.936	0	16.449	631080	22	10	NbD024270.1	NbD024270.1	1742
NaN	NaN	NaN	NaN	NaN	NaN				-1	1	1	1	5.8	5.8	5.8	25.967	0	58.121	626020	10	6	NbD024308.1	NbD024308.1	1743
NaN	NaN	NaN	NaN	NaN	NaN				-1	1	1	1	9.8	9.8	9.8	20.833	0.0011938	9.3115	43012	13	1	NbD024319.1	NbD024319.1	1744
NaN	NaN	NaN	NaN	NaN	NaN				-1	1	1	1	2.4	2.4	2.4	68.653	0	12.058	290760	24	6	NbD024328.1;NbD051145.1	NbD024328.1;NbD051145.1	1745
NaN	NaN	NaN	NaN	NaN	NaN				-1	1	1	1	9.8	9.8	9.8	21.618	0.0011952	9.4274	28517	12	2	NbD024337.1	NbD024337.1	1746
18.9582	17.9888	18.6448	17.8688	18.0573	17.9015				-1	9	9	8	41.9	41.9	37	35.386	0	102.41	6193400	17	42	NbD024340.1;NbD024339.1;NbD000290.1;NbD022216.1	NbD024340.1;NbD024339.1;NbD000290.1	1747
16.2921	NaN	16.1353	NaN	16.178	NaN				-1	4	4	4	3.4	3.4	3.4	212.32	0	29.761	529570	89	10	NbE03059179.1;NbD024368.1;NbE03053852.1;NbD052729.1	NbE03059179.1;NbD024368.1;NbE03053852.1;NbD052729.1	1749
16.774	15.9984	16.2214	15.5582	15.6168	NaN				-1	9	9	6	25.2	25.2	15.6	49.985	0	103.19	1066900	17	20	NbD024372.1;NbD040446.1	NbD024372.1;NbD040446.1	1750
NaN	NaN	NaN	NaN	NaN	NaN				-1	4	4	1	28.3	28.3	5.3	26.319	0	34.693	693590	12	9	NbD024376.1;NbD024375.1	NbD024376.1	1751
NaN	NaN	NaN	NaN	NaN	NaN				-1	9	2	2	15.3	1.9	1.9	67.34	0	12.984	209490	28	6	NbD024401.1	NbD024401.1	1752
NaN	15.9738	16.318	NaN	16.4231	NaN				-1	11	3	3	28.2	7.1	7.1	43.89	0	23.027	643660	25	12	NbD024452.1	NbD024452.1	1753
16.5255	16.487	16.6342	16.2891	16.8996	16.6019				-1	5	5	5	17.8	17.8	17.8	36.579	0	63.537	1808600	17	26	NbD024468.1;NbD010866.1	NbD024468.1;NbD010866.1	1754
NaN	NaN	NaN	16.1473	15.8288	16.3019				-1	4	2	2	20.6	11.5	11.5	29.125	0	22.127	441010	13	7	NbE03056010.1;NbD024504.1	NbE03056010.1;NbD024504.1	1755
18.5066	18.1875	18.5159	18.4435	18.4948	17.401				-1	10	10	10	24	24	24	47.192	0	140.92	4291000	24	33	NbD024539.1;NbE05067727.1;NbD035217.1	NbD024539.1;NbE05067727.1;NbD035217.1	1756
16.7691	16.1148	16.6722	15.8926	16.6844	15.8087				-1	2	2	2	5.3	5.3	5.3	35.862	0	24.769	960410	6	15	NbD044508.1;NbD024540.1	NbD044508.1;NbD024540.1	1757
15.645	NaN	NaN	NaN	16.5322	NaN				-1	2	2	2	11.5	11.5	11.5	23.877	0	12.921	479420	8	9	NbE44072985.1;NbD044502.1;NbD024544.1	NbE44072985.1;NbD044502.1;NbD024544.1	1758
NaN	15.6203	NaN	15.6001	NaN	NaN				-1	4	4	4	20.7	20.7	20.7	34.677	0	28.282	373230	18	11	NbD039814.1;NbE03059795.1;NbD024557.1;NbE03053612.1	NbD039814.1;NbE03059795.1;NbD024557.1;NbE03053612.1	1759
NaN	16.2922	15.7554	16.0843	NaN	15.9931				-1	5	5	3	16	16	8.7	46.509	0	46.063	763820	16	16	NbD024559.1;NbD042251.1	NbD024559.1	1760
NaN	18.0218	17.0958	18.3465	NaN	18.2733				-1	21	4	4	26.2	5.5	5.5	98.22	0	25.519	2665100	55	14	NbE05063359.1;NbD024579.1	NbE05063359.1;NbD024579.1	1761
NaN	18.3598	19.0189	18.6245	18.7002	18.139				-1	20	5	0	53.6	14.9	0	41.711	0	40.794	2726700	21	17	NbD024598.1	NbD024598.1	1762
16.4652	NaN	15.9196	NaN	NaN	15.7971				-1	4	4	4	30.9	30.9	30.9	25.825	0	25.07	603870	15	12	NbD024945.1;NbD024615.1	NbD024945.1;NbD024615.1	1763
NaN	NaN	NaN	17.9171	NaN	17.0598				-1	9	2	2	27.4	6.1	6.1	42.362	0	13.365	943430	26	7	NbD024638.1;NbD031585.1;NbE05064187.1	NbD024638.1;NbD031585.1;NbE05064187.1	1764
NaN	NaN	NaN	NaN	NaN	NaN				-1	3	1	0	7.3	3.6	0	58.614	0.0046454	6.4354	20750	29	1	NbE03059583.1;NbD024646.1	NbE03059583.1;NbD024646.1	1765
NaN	NaN	NaN	NaN	NaN	NaN				-1	1	1	1	2.1	2.1	2.1	79.937	0.0014099	7.5862	59085	38	2	NbD024675.1;NbE05067642.1;NbE05063813.1;NbD041930.1	NbD024675.1;NbE05067642.1;NbE05063813.1;NbD041930.1	1766
15.8942	NaN	15.9893	NaN	NaN	NaN				-1	2	2	2	8.9	8.9	8.9	39.666	0	15.778	203030	18	4	NbD024694.1	NbD024694.1	1767
19.2534	19.145	19.204	18.9769	19.1006	18.8754				-1	12	12	4	41.8	41.8	14.9	42.624	0	195.99	16720000	22	85	NbD024768.1;NbD030018.1;NbE03061739.1	NbD024768.1;NbD030018.1;NbE03061739.1	1768
NaN	17.1546	NaN	17.1963	16.1288	17.2705				-1	11	7	7	25.4	18.2	18.2	70.102	0	52.831	1490000	36	18	NbD024818.1;NbE05067442.1;NbE44073109.1;NbD044294.1	NbD024818.1;NbE05067442.1;NbE44073109.1	1769
16.2458	16.3377	16.4244	16.2055	NaN	16.2648				-1	2	2	2	8	8	8	35.218	0	21.061	691520	18	12	NbD024824.1	NbD024824.1	1770
NaN	NaN	NaN	16.4287	16.4065	16.4338				-1	2	2	2	5.6	5.6	5.6	57.799	0	19.657	775640	33	11	NbD024834.1;NbE03056038.1;NbD042718.1	NbD024834.1;NbE03056038.1;NbD042718.1	1771
NaN	NaN	NaN	NaN	NaN	NaN				-1	1	1	1	4.6	4.6	4.6	47.07	0.0012265	10.551	118110	15	6	NbD048627.1;NbD024901.1	NbD048627.1;NbD024901.1	1772
NaN	NaN	NaN	NaN	16.6124	16.8218				-1	5	5	4	13.7	13.7	11.1	58.153	0	48.366	459280	34	8	NbD048748.1;NbD024911.1	NbD048748.1;NbD024911.1	1773
NaN	NaN	NaN	NaN	NaN	NaN				-1	9	2	2	11.5	2.1	2.1	121.97	0	12.927	293270	49	5	NbD024914.1;NbE03054404.1	NbD024914.1;NbE03054404.1	1774
NaN	NaN	NaN	NaN	NaN	NaN				-1	1	1	1	7.3	7.3	7.3	24.343	0.0011848	9.1011	798570	6	7	NbE03058894.1;NbD035965.1;NbD024917.1	NbE03058894.1;NbD035965.1;NbD024917.1	1775
17.3301	NaN	17.0496	17.0062	17.2062	16.9732				-1	2	2	2	10.1	10.1	10.1	38.117	0	44.68	1328800	19	12	NbD024919.1;NbD046098.1	NbD024919.1;NbD046098.1	1776
NaN	NaN	NaN	NaN	NaN	NaN				-1	13	2	1	20.9	3.7	1.8	91.925	0.0012356	10.958	71022	49	2	NbD024921.1	NbD024921.1	1777
NaN	NaN	NaN	NaN	NaN	NaN				-1	2	1	1	23.7	12.2	12.2	17.228	0.0016292	6.8393	40879	11	1	NbD024930.1	NbD024930.1	1778
18.4954	18.4974	18.3699	18.2563	18.089	18.0688				-1	8	7	7	49.5	44.4	44.4	24.242	0	58.512	3210400	18	28	NbD036956.1;NbD024935.1;NbE44074397.1;NbD010003.1;NbD005703.1	NbD036956.1;NbD024935.1;NbE44074397.1	1779
18.5826	18.3868	18.6457	18.3384	18.2442	18.1861				-1	18	4	4	61.2	16.5	16.5	38.611	0	78.02	5265000	22	35	NbD024950.1	NbD024950.1	1780
NaN	NaN	NaN	16.6287	NaN	16.8132				-1	3	1	1	17.3	8	8	28.305	0	19.594	273310	9	5	NbD024953.1	NbD024953.1	1781
NaN	NaN	NaN	15.4401	15.721	NaN				-1	4	4	3	8	8	5.9	82.473	0	32.412	304850	38	7	NbD024960.1;NbD020365.1;NbD009271.1	NbD024960.1	1782
18.7023	18.5462	18.6263	18.6052	18.4791	18.4677				-1	20	20	3	38.1	38.1	7.8	41.865	0	263.08	13873000	20	108	NbD046880.1;NbD024969.1;NbD015760.1;NbD038588.1	NbD046880.1;NbD024969.1;NbD015760.1	1783
NaN	NaN	NaN	NaN	NaN	NaN				-1	1	1	1	7.6	7.6	7.6	36.166	0.0017123	7.2768	494030	13	4	NbE05066508.1;NbD046385.1;NbD024974.1	NbE05066508.1;NbD046385.1;NbD024974.1	1784
NaN	NaN	NaN	NaN	NaN	NaN				-1	2	2	2	5.4	5.4	5.4	53.403	0	12.394	101790	20	4	NbD024995.1;NbD051785.1;NbD049393.1	NbD024995.1;NbD051785.1;NbD049393.1	1785
NaN	NaN	NaN	NaN	NaN	NaN				-1	15	2	2	49.3	8.1	8.1	44.229	0	15.042	175060	26	3	NbD025005.1;NbE03059725.1	NbD025005.1	1786
18.6544	18.315	NaN	17.9462	16.6918	17.8882				-1	9	2	2	30.3	9.7	9.7	35.609	0	30.781	2271400	14	11	NbD025017.1;NbD040420.1;NbE03056895.1	NbD025017.1;NbD040420.1;NbE03056895.1	1787
NaN	NaN	NaN	NaN	NaN	NaN				-1	2	2	2	3.5	3.5	3.5	65.9	0	12.392	258970	32	5	NbE03060599.1;NbD025024.1;NbD029733.1	NbE03060599.1;NbD025024.1;NbD029733.1	1788
NaN	NaN	NaN	NaN	NaN	NaN				-1	1	1	1	4	4	4	54.255	0.0011655	8.7554	144250	30	4	NbD025025.1;NbE05064091.1;NbE05063207.1;NbD035384.1	NbD025025.1;NbE05064091.1;NbE05063207.1;NbD035384.1	1789
NaN	NaN	NaN	NaN	NaN	NaN				-1	1	1	1	5.8	5.8	5.8	26.803	0	16.964	1828300	12	6	NbD025035.1	NbD025035.1	1790
NaN	17.805	NaN	17.7363	17.5863	NaN				-1	3	3	2	20.2	20.2	13.7	25.87	0	35.633	1488000	15	10	NbD025043.1	NbD025043.1	1791
17.4979	17.3649	NaN	NaN	17.6444	17.2086				-1	1	1	1	4	4	4	51.177	0.0011021	7.8808	1134900	9	10	NbD043412.1;NbD025061.1	NbD043412.1;NbD025061.1	1792
17.1258	17.6846	17.0402	17.304	17.1907	17.3926				-1	21	3	3	42.7	8	8	58.698	0	22.062	1576400	32	16	NbD025064.1	NbD025064.1	1793
16.8021	16.65	16.7116	16.9068	16.5315	16.5699				-1	6	6	4	12.2	12.2	9.4	57.415	0	43.651	1375900	31	22	NbD025066.1	NbD025066.1	1794
NaN	NaN	NaN	NaN	NaN	NaN				-1	1	1	1	3.9	3.9	3.9	58.046	0.001406	7.5648	124770	22	3	NbD025073.1	NbD025073.1	1795
NaN	16.9335	15.8546	16.6429	NaN	16.5677				-1	2	1	1	5.4	3.3	3.3	48.242	0.0011867	9.1245	591440	20	10	NbE05066431.1;NbD025113.1	NbE05066431.1;NbD025113.1	1796
NaN	NaN	NaN	NaN	NaN	NaN				-1	10	2	2	23.5	6.4	6.4	57.656	0	13.698	377180	29	5	NbD025121.1	NbD025121.1	1797
17.4098	17.6906	17.3257	17.4473	16.8959	17.4076				-1	7	7	2	24.1	24.1	6.1	29.536	0	79.308	4003500	14	40	NbD025143.1;NbD021002.1	NbD025143.1	1798
17.7823	18.3286	17.8131	18.3323	17.588	18.2757				-1	28	28	14	35.6	35.6	19.4	110.03	0	285.71	12080000	60	128	NbD025146.1;NbE44072113.1	NbD025146.1;NbE44072113.1	1799
17.4166	16.9058	17.7065	17.2089	17.3222	17.1509				-1	10	10	4	17	17	8.5	97.471	0	67.156	2910800	39	32	NbD025154.1	NbD025154.1	1800
NaN	NaN	NaN	NaN	NaN	NaN				-1	1	1	1	9.6	9.6	9.6	11.95	0	13.592	2552200	5	6	NbD025159.1	NbD025159.1	1801
NaN	NaN	NaN	NaN	NaN	NaN				-1	1	1	1	1.3	1.3	1.3	127.27	0.0011614	8.6521	114510	57	3	NbD046443.1;NbD025183.1;NbE44073591.1	NbD046443.1;NbD025183.1;NbE44073591.1	1802
NaN	NaN	17.1522	16.809	16.9201	NaN				-1	3	3	3	14.6	14.6	14.6	30.165	0	21.148	889780	11	12	NbD025212.1	NbD025212.1	1803
NaN	NaN	NaN	NaN	NaN	NaN				-1	1	1	1	2.6	2.6	2.6	58.515	0.0044136	6.5578	29528	31	1	NbD025230.1	NbD025230.1	1804
16.28	16.6915	16.2635	16.9362	16.4029	16.7838				-1	8	8	8	6.8	6.8	6.8	147.3	0	64.933	1803500	61	33	NbE03056901.1;NbE03053363.1;NbD025242.1;NbD038692.1	NbE03056901.1;NbE03053363.1;NbD025242.1;NbD038692.1	1805
NaN	18.5907	17.2192	19.2042	16.7739	19.0785				-1	4	4	3	19.9	19.9	16.8	24.093	0	36.247	3263700	6	17	NbD025243.1	NbD025243.1	1806
NaN	NaN	NaN	NaN	NaN	NaN				-1	3	1	1	34.4	10.6	10.6	17.185	0.0048662	6.3334	55142	7	1	NbD026091.1;NbD025259.1;NbD026579.1;NbD002872.1	NbD026091.1;NbD025259.1;NbD026579.1	1807
NaN	NaN	NaN	NaN	NaN	NaN				-1	13	2	2	30	5.6	5.6	57.302	0	12.402	133910	30	4	NbE03056791.1;NbD025305.1	NbE03056791.1;NbD025305.1	1808
19.3469	18.4937	18.9947	NaN	NaN	NaN				-1	5	2	2	32.4	11.8	11.8	15.326	0	14.572	2514500	6	11	NbD025318.1	NbD025318.1	1809
NaN	NaN	NaN	NaN	NaN	NaN				-1	1	1	1	5.4	5.4	5.4	28.861	0.0010627	7.6174	236970	16	3	NbD025345.1	NbD025345.1	1810
17.3576	16.0375	17.0566	NaN	16.5554	15.882				-1	5	5	4	20.4	20.4	15	44.938	0	32.443	1174500	18	15	NbD025354.1	NbD025354.1	1811
NaN	NaN	NaN	NaN	NaN	NaN				-1	1	1	1	3.9	3.9	3.9	34.525	0.001217	10.19	144670	19	3	NbE03056413.1;NbD025359.1	NbE03056413.1;NbD025359.1	1812
17.0841	16.7391	16.9123	16.3925	16.7481	15.9527				-1	8	8	2	30.4	30.4	10.3	55.006	0	66.292	1590200	26	29	NbE05063972.1;NbD025367.1	NbE05063972.1;NbD025367.1	1813
NaN	NaN	NaN	NaN	NaN	NaN				-1	1	1	1	2.9	2.9	2.9	37.777	0.0040997	6.5623	116720	24	2	NbE44070894.1;NbD025371.1;NbD030675.1	NbE44070894.1;NbD025371.1;NbD030675.1	1814
18.6047	18.6665	18.5479	18.3313	18.7276	18.5825				-1	9	9	9	13	13	13	69.391	0	172.1	6151100	27	40	NbD049811.1;NbD025385.1;NbE03055016.1	NbD049811.1;NbD025385.1;NbE03055016.1	1815
NaN	NaN	NaN	NaN	NaN	NaN				-1	3	2	2	8.2	5.9	5.9	52.889	0	16.789	280320	26	7	NbD025433.1	NbD025433.1	1816
NaN	NaN	NaN	NaN	NaN	NaN				-1	2	1	1	3.9	2.3	2.3	69.053	0.0014055	7.5639	65534	37	1	NbE03056528.1;NbD025452.1	NbE03056528.1;NbD025452.1	1817
NaN	NaN	NaN	NaN	NaN	NaN				-1	7	1	1	32.5	13.2	13.2	24.792	0.0012156	10.123	451210	7	5	NbD025469.1	NbD025469.1	1818
16.6653	16.6216	16.5538	16.7559	16.3999	16.8396				-1	13	13	6	19.5	19.5	9.1	109.1	0	111.39	1578200	59	28	NbD025476.1	NbD025476.1	1819
NaN	NaN	NaN	NaN	NaN	NaN				-1	1	1	1	5.2	5.2	5.2	25.753	0.0046411	6.4283	17563	8	1	NbD044132.1;NbD025485.1	NbD044132.1;NbD025485.1	1820
17.8834	18.5899	17.9142	18.2859	17.7265	18.3941				-1	12	12	12	67.9	67.9	67.9	17.496	0	148.43	6707800	7	61	NbD025509.1;NbD000112.1	NbD025509.1	1821
NaN	NaN	NaN	NaN	NaN	NaN				-1	1	1	1	14.8	14.8	14.8	12.256	0.00411	6.5795	122060	6	3	NbD025526.1	NbD025526.1	1822
NaN	NaN	NaN	NaN	NaN	NaN				-1	1	1	1	4.5	4.5	4.5	38.723	0.0017283	7.3592	32131	21	1	NbE03058196.1;NbD025528.1	NbE03058196.1;NbD025528.1	1823
NaN	NaN	NaN	NaN	NaN	NaN				-1	1	1	1	5.4	5.4	5.4	22.496	0.0094118	6.1088	32245	13	1	NbD025544.1;NbE03060597.1;NbD025545.1;NbE44072938.1	NbD025544.1;NbE03060597.1;NbD025545.1;NbE44072938.1	1824
NaN	NaN	NaN	NaN	NaN	NaN				-1	1	1	1	1.3	1.3	1.3	118.84	0.0010601	7.6062	53001	66	3	NbE44070102.1;NbD025562.1	NbE44070102.1;NbD025562.1	1825
NaN	NaN	NaN	NaN	NaN	NaN				-1	1	1	1	1.8	1.8	1.8	107.49	0.0066046	6.246	44957	50	3	NbE03056679.1;NbD025569.1	NbE03056679.1;NbD025569.1	1826
NaN	NaN	NaN	NaN	NaN	NaN				-1	1	1	1	11.4	11.4	11.4	17.665	0.0011858	9.1118	552410	10	5	NbE03058465.1;NbD052042.1;NbD025608.1	NbE03058465.1;NbD052042.1;NbD025608.1	1827
NaN	NaN	NaN	NaN	NaN	NaN				-1	1	1	1	3.8	3.8	3.8	63.21	0.0011377	8.2275	352290	28	6	NbD025612.1;NbE44073224.1	NbD025612.1;NbE44073224.1	1828
NaN	NaN	NaN	NaN	NaN	NaN				-1	1	1	1	2.3	2.3	2.3	92.611	0.0011924	9.2854	91189	37	4	NbD025623.1;NbE44071249.1	NbD025623.1;NbE44071249.1	1829
NaN	NaN	NaN	NaN	NaN	NaN				-1	1	1	1	4.1	4.1	4.1	39.276	0.004896	6.3582	32375	16	1	NbD025648.1;NbE44071584.1	NbD025648.1;NbE44071584.1	1830
18.517	19.8166	18.7279	19.571	18.8015	19.7916				-1	25	25	8	30	30	9.7	94.906	0	323.31	22000000	53	122	NbE44069004.1;NbD025668.1	NbE44069004.1;NbD025668.1	1831
18.0437	18.5167	18.1706	18.2923	18.3441	18.6077				-1	6	6	3	22.2	22.2	12.9	39.347	0	42.713	2629800	16	19	NbD025686.1;NbD029919.1;NbE05067563.1;NbD006083.1;NbD024830.1	NbD025686.1;NbD029919.1;NbE05067563.1;NbD006083.1;NbD024830.1	1832
NaN	NaN	NaN	NaN	NaN	NaN				-1	1	1	1	5.2	5.2	5.2	49.064	0	12.256	146030	25	3	NbD029918.1;NbE05066051.1;NbD025688.1	NbD029918.1;NbE05066051.1;NbD025688.1	1833
NaN	NaN	NaN	17.5021	17.5496	17.3588				-1	3	3	3	15.2	15.2	15.2	29.422	0	22.598	788080	17	10	NbD025692.1;NbD029912.1;NbD007092.1	NbD025692.1;NbD029912.1;NbD007092.1	1834
NaN	NaN	NaN	NaN	NaN	NaN				-1	1	1	1	2.9	2.9	2.9	63.299	0.0016595	6.991	61588	26	2	NbD025701.1	NbD025701.1	1835
15.9131	15.4108	15.7066	14.835	15.1604	14.8002				-1	5	5	5	14.6	14.6	14.6	51.073	0	39.134	474790	22	15	NbD025702.1;NbD039799.1	NbD025702.1;NbD039799.1	1836
NaN	16.1467	NaN	16.134	NaN	16.3309				-1	4	4	3	9.7	9.7	6.7	66.781	0	26.954	568120	30	12	NbD041660.1;NbD025747.1;NbD003671.1;NbD035048.1;NbE44073896.1;NbE03059798.1;NbD045221.1;NbD035877.1	NbD041660.1;NbD025747.1;NbD003671.1;NbD035048.1;NbE44073896.1;NbE03059798.1;NbD045221.1;NbD035877.1	1837
NaN	NaN	NaN	NaN	NaN	NaN				-1	4	4	3	11.7	11.7	8.9	47.028	0	25.243	562910	19	6	NbD025765.1;NbD034359.1	NbD025765.1;NbD034359.1	1838
NaN	NaN	NaN	NaN	NaN	NaN				-1	2	2	2	6.8	6.8	6.8	34.783	0	12.296	276150	16	3	NbD025793.1	NbD025793.1	1839
NaN	NaN	NaN	NaN	NaN	NaN				-1	2	2	2	11.9	11.9	11.9	27.563	0	14.496	157310	7	3	NbD025811.1	NbD025811.1	1840
NaN	NaN	NaN	NaN	NaN	NaN				-1	3	3	3	24.4	24.4	24.4	22.936	0	19.662	235930	13	6	NbD025822.1	NbD025822.1	1841
NaN	NaN	NaN	NaN	NaN	NaN				-1	11	3	3	26	11.5	11.5	61.453	0	29.467	571650	28	8	NbE03055699.1;NbD025854.1	NbE03055699.1;NbD025854.1	1842
17.3079	17.3638	17.5276	NaN	17.137	17.0037				-1	7	7	2	27.7	27.7	10.1	30.706	0	47.088	1960400	14	20	NbE44072281.1;NbD025860.1	NbE44072281.1;NbD025860.1	1843
NaN	NaN	NaN	NaN	NaN	NaN				-1	1	1	1	9.3	9.3	9.3	14.347	0.0010941	7.8154	370760	6	6	NbD035102.1;NbD025873.1	NbD035102.1;NbD025873.1	1844
NaN	NaN	NaN	NaN	NaN	NaN				-1	1	1	1	3.7	3.7	3.7	26.447	0.0043915	6.5229	81463	11	1	NbD025899.1	NbD025899.1	1845
17.6858	17.4151	17.5394	16.9101	17.2374	16.9244				-1	13	13	3	30.6	30.6	7.4	60.686	0	126.55	4194000	32	52	NbD025909.1	NbD025909.1	1846
NaN	NaN	NaN	NaN	NaN	NaN				-1	7	2	2	13.3	4.8	4.8	84.923	0	11.602	236410	48	5	NbE03055346.1;NbD025915.1	NbE03055346.1;NbD025915.1	1847
NaN	NaN	NaN	NaN	NaN	NaN				-1	2	2	2	11.9	11.9	11.9	47.123	0	14.366	43413	22	2	NbD025979.1;NbE05063888.1	NbD025979.1;NbE05063888.1	1848
18.7698	NaN	18.5181	NaN	18.5254	NaN				-1	12	12	2	26	26	4.3	70.665	0	145.18	4325700	35	29	NbD026018.1	NbD026018.1	1849
16.4277	17.4794	17.2458	17.862	18.0995	17.6629				-1	12	12	4	31.3	31.3	12.3	53.703	0	93.581	3775500	29	41	NbD026061.1;NbD050041.1;NbD041126.1;NbD017293.1	NbD026061.1;NbD050041.1;NbD041126.1;NbD017293.1	1851
NaN	NaN	NaN	NaN	NaN	NaN				-1	4	2	2	11.3	4.9	4.9	56.685	0	11.622	41992	26	2	NbE44074217.1;NbD026076.1;NbD045119.1;NbE44069155.1;NbE05068843.1	NbE44074217.1;NbD026076.1;NbD045119.1;NbE44069155.1;NbE05068843.1	1852
NaN	NaN	NaN	NaN	NaN	NaN				-1	1	1	1	3.8	3.8	3.8	41.555	0.0074605	6.1954	34459	18	2	NbD045120.1;NbD026077.1	NbD045120.1;NbD026077.1	1853
19.1232	18.9217	19.1368	18.7743	18.7263	18.7157				-1	13	13	13	25	25	25	64.434	0	251.93	12219000	29	63	NbD026078.1	NbD026078.1	1854
NaN	NaN	NaN	NaN	NaN	NaN				-1	2	1	1	5	2.6	2.6	59.875	0.0016244	6.8275	58026	27	2	NbD026080.1	NbD026080.1	1855
NaN	NaN	NaN	NaN	NaN	NaN				-1	1	1	1	12.9	12.9	12.9	15.865	0.0017082	7.2579	2858.3	5	1	NbD026181.1;NbD036957.1	NbD026181.1;NbD036957.1	1856
NaN	NaN	15.9517	NaN	15.6676	NaN				-1	1	1	1	11.5	11.5	11.5	13.989	0.0010676	7.6442	352700	6	7	NbD026234.1	NbD026234.1	1857
NaN	17.085	16.6715	NaN	NaN	17.7836				-1	14	9	4	36.7	25.9	12.2	42.482	0	55.077	1010700	26	16	NbD026241.1;NbD032652.1	NbD026241.1;NbD032652.1	1858
NaN	NaN	NaN	NaN	NaN	NaN				-1	1	1	1	9.4	9.4	9.4	23.052	0.0011834	9.0821	201490	12	6	NbE03061048.1;NbD026298.1	NbE03061048.1;NbD026298.1	1859
NaN	NaN	NaN	NaN	NaN	NaN				-1	2	2	2	3.8	3.8	3.8	80.365	0.00083229	11.223	100700	35	2	NbE03059177.1;NbD040451.1;NbE03059327.1;NbD026304.1;NbD012308.1;NbE44072592.1;NbD026960.1	NbE03059177.1;NbD040451.1;NbE03059327.1;NbD026304.1;NbD012308.1;NbE44072592.1;NbD026960.1	1860
15.6911	NaN	15.7012	NaN	15.7224	NaN				-1	2	2	2	9.5	9.5	9.5	37.434	0	13.364	280820	17	7	NbD026308.1;NbE05063725.1;NbE44071993.1;NbD037963.1	NbD026308.1;NbE05063725.1;NbE44071993.1;NbD037963.1	1861
NaN	NaN	NaN	NaN	NaN	NaN				-1	1	1	1	8.1	8.1	8.1	21.638	0.0016119	6.7691	11223	12	1	NbD026319.1	NbD026319.1	1862
NaN	NaN	NaN	NaN	NaN	NaN				-1	2	2	2	18.3	18.3	18.3	23.158	0.0008316	11.215	81630	14	3	NbD038567.1;NbD026320.1	NbD038567.1;NbD026320.1	1863
NaN	NaN	NaN	NaN	NaN	NaN				-1	1	1	1	7.7	7.7	7.7	20.123	0.0046282	6.4061	86082	11	2	NbD026342.1	NbD026342.1	1864
NaN	NaN	NaN	NaN	NaN	NaN				-1	4	1	1	17.9	6.2	6.2	39.426	0.0043736	6.4959	129210	21	3	NbD026345.1;NbE05066322.1	NbD026345.1;NbE05066322.1	1865
17.6398	17.4704	17.9857	17.2277	17.4106	17.5239				-1	3	2	2	16.3	10.9	10.9	37.536	0	18.286	1622700	17	17	NbD026349.1;NbE05066323.1	NbD026349.1;NbE05066323.1	1866
17.5509	17.6332	17.8141	17.3442	17.7215	17.4976				-1	6	6	6	29.2	29.2	29.2	29.647	0	77.564	2493500	16	25	NbD026383.1;NbE44069021.1;NbE05063129.1	NbD026383.1;NbE44069021.1	1867
16.1395	NaN	NaN	NaN	15.7838	NaN				-1	5	5	5	4.1	4.1	4.1	162.42	0	34.296	404300	76	8	NbE05064860.1;NbD031951.1;NbD026394.1	NbE05064860.1;NbD031951.1;NbD026394.1	1868
17.8591	17.5018	17.7566	17.5138	18.1592	17.8267				-1	10	10	4	24.5	24.5	8.9	54.674	0	101.85	4014000	24	39	NbD026416.1	NbD026416.1	1869
19.4894	19.3524	19.4729	19.1084	19.1407	18.8963				-1	12	12	4	38.6	38.6	16.5	39.817	0	159.82	8957700	16	52	NbE05063437.1;NbD026434.1	NbE05063437.1;NbD026434.1	1871
NaN	NaN	NaN	NaN	NaN	NaN				-1	2	2	2	4.5	4.5	4.5	81.607	0	15.309	135020	40	8	NbD026441.1;NbD046313.1	NbD026441.1;NbD046313.1	1872
NaN	NaN	NaN	NaN	NaN	NaN				-1	2	2	2	6.6	6.6	6.6	36.504	0	13.828	86009	16	2	NbD042708.1;NbE05067904.1;NbE03059853.1;NbD026463.1	NbD042708.1;NbE05067904.1;NbE03059853.1;NbD026463.1	1873
NaN	NaN	NaN	NaN	NaN	NaN				-1	1	1	1	7.9	7.9	7.9	17.785	0.0016124	6.773	55477	8	2	NbD033129.1;NbD026471.1	NbD033129.1;NbD026471.1	1874
NaN	NaN	NaN	NaN	NaN	NaN				-1	2	2	2	8.8	8.8	8.8	45.045	0	17.806	426060	21	5	NbD026478.1	NbD026478.1	1875
17.7947	NaN	NaN	NaN	18.3584	NaN				-1	2	2	2	13.4	13.4	13.4	24.045	0	14.989	1244600	8	9	NbD026489.1;NbD026728.1;NbD034320.1	NbD026489.1;NbD026728.1;NbD034320.1	1876
16.6217	16.4144	16.309	16.2481	16.3329	16.2967				-1	9	3	3	19.9	6.7	6.7	62.474	0	36.532	989660	32	16	NbE05066660.1;NbD026492.1;NbE05066259.1;NbE44074126.1;NbD014807.1;NbE03062390.1	NbE05066660.1;NbD026492.1;NbE05066259.1;NbE44074126.1;NbD014807.1	1877
NaN	NaN	NaN	NaN	NaN	NaN				-1	2	1	1	15.3	7.2	7.2	25.987	0.0016622	7.0179	29397	14	1	NbD026513.1	NbD026513.1	1878
16.2218	16.0336	16.1869	16.0215	NaN	16.0709				-1	2	2	2	19.3	19.3	19.3	21.201	0	13.991	668320	11	13	NbD026524.1;NbD050092.1;NbD021900.1	NbD026524.1;NbD050092.1;NbD021900.1	1879
NaN	NaN	NaN	NaN	NaN	NaN				-1	1	1	1	1.8	1.8	1.8	108.52	0.0017117	7.2652	26941	39	1	NbD026537.1	NbD026537.1	1880
NaN	NaN	NaN	NaN	NaN	NaN				-1	1	1	1	4.1	4.1	4.1	38.156	0	12.162	864010	20	6	NbD050972.1;NbD026598.1	NbD050972.1;NbD026598.1	1881
15.6093	NaN	15.5555	NaN	15.8696	15.6084				-1	5	5	1	20	20	5.3	52.459	0	33.203	500570	28	11	NbD026629.1;NbE03053502.1;NbD000361.1;NbD035966.1	NbD026629.1;NbE03053502.1;NbD000361.1	1882
16.5	NaN	NaN	NaN	NaN	16.2819				-1	4	4	4	10.6	10.6	10.6	66.486	0	27.345	729840	31	11	NbD026675.1	NbD026675.1	1883
NaN	16.1544	NaN	NaN	16.7782	16.546				-1	4	4	4	17.8	17.8	17.8	32.189	0	27.023	544400	11	9	NbD026693.1;NbD043768.1	NbD026693.1	1884
NaN	NaN	NaN	NaN	NaN	NaN				-1	1	1	1	13	13	13	11.925	0.0010949	7.8176	263540	6	5	NbD034644.1;NbD026698.1	NbD034644.1;NbD026698.1	1885
16.4044	NaN	15.7514	15.8347	NaN	15.5374				-1	3	3	3	9.6	9.6	9.6	58.6	0	22.1	452820	29	11	NbD026723.1;NbD052668.1;NbD032760.1;NbD034326.1	NbD026723.1;NbD052668.1	1886
NaN	NaN	NaN	NaN	NaN	NaN				-1	2	2	2	5	5	5	70.513	0	24.713	231250	33	6	NbD031918.1;NbD026753.1;NbE05063136.1;NbD010980.1;NbE44068994.1;NbD016776.1;NbD006363.1	NbD031918.1;NbD026753.1;NbE05063136.1;NbD010980.1;NbE44068994.1;NbD016776.1;NbD006363.1	1887
NaN	NaN	NaN	NaN	NaN	NaN				-1	1	1	1	13.2	13.2	13.2	13.114	0	22.13	144290	7	3	NbD040346.1;NbD026761.1	NbD040346.1;NbD026761.1	1888
NaN	NaN	NaN	17.7281	NaN	17.4463				-1	2	2	2	13.6	13.6	13.6	23.246	0	19.798	1445700	11	8	NbD026780.1;NbE44071661.1;NbD027446.1	NbD026780.1;NbE44071661.1;NbD027446.1	1889
NaN	NaN	NaN	NaN	NaN	NaN				-1	8	4	1	6.9	3.8	0.8	209.03	0	25.914	198730	92	5	NbD026839.1;NbE05063410.1;NbE03056560.1	NbD026839.1;NbE05063410.1;NbE03056560.1	1890
NaN	NaN	NaN	NaN	NaN	NaN				-1	1	1	1	9.1	9.1	9.1	19.694	0	12.398	578580	8	6	NbD027717.1;NbD026869.1	NbD027717.1;NbD026869.1	1891
16.2423	16.2067	16.068	16.155	15.9307	15.8917				-1	2	2	2	14.5	14.5	14.5	24.943	0	14.741	839850	13	13	NbD026901.1	NbD026901.1	1892
NaN	NaN	NaN	15.4179	NaN	15.5671				-1	2	2	2	8.8	8.8	8.8	30.944	0	14.77	200730	17	5	NbD026904.1	NbD026904.1	1893
NaN	NaN	NaN	NaN	NaN	NaN				-1	6	3	2	25.6	14.5	9.5	41.621	0	19.108	94304	21	4	NbD026914.1;NbE44073999.1;NbE03059307.1	NbD026914.1;NbE44073999.1;NbE03059307.1	1894
NaN	NaN	NaN	NaN	NaN	NaN				-1	1	1	1	5.5	5.5	5.5	41.558	0.0016589	6.9906	154270	24	3	NbE03056682.1;NbD026940.1	NbE03056682.1;NbD026940.1	1895
NaN	16.9816	NaN	16.2061	NaN	16.1551				-1	3	3	2	18.7	18.7	13.5	25.452	0	20.867	503820	12	7	NbD026973.1;NbE44072469.1;NbE44071949.1	NbD026973.1	1896
NaN	NaN	NaN	NaN	NaN	NaN				-1	3	3	1	16.3	16.3	5.7	33.074	0	22.864	531540	20	8	NbD026974.1	NbD026974.1	1897
17.39	16.9393	17.3024	17.0811	17.3819	16.9754				-1	5	5	5	28.3	28.3	28.3	28.007	0	40.085	2501000	11	28	NbD026977.1;NbD022948.1	NbD026977.1	1898
NaN	NaN	NaN	NaN	NaN	NaN				-1	1	1	1	1	1	1	179.47	0.0012097	9.8451	86963	99	3	NbD026984.1	NbD026984.1	1899
NaN	NaN	NaN	NaN	NaN	NaN				-1	3	3	3	23.3	23.3	23.3	20.124	0	21.597	97165	11	4	NbD026990.1;NbE05063784.1;NbD026991.1;NbD027043.1	NbD026990.1;NbE05063784.1;NbD026991.1;NbD027043.1	1900
17.3095	17.6441	16.9878	17.0674	16.5618	17.0363				-1	6	6	5	9.3	9.3	7.1	75.032	0	47.054	2395400	31	34	NbE05064923.1;NbD026995.1	NbE05064923.1;NbD026995.1	1901
19.3702	19.0345	19.2115	19.1869	19.5058	19.11				-1	34	30	4	38.2	33.8	3.8	105.31	0	323.31	18281000	48	123	NbD026998.1;NbD005222.1;NbE44073973.1;NbD046056.1	NbD026998.1	1902
NaN	NaN	NaN	NaN	NaN	NaN				-1	1	1	1	4.4	4.4	4.4	49.401	0.001223	10.452	187930	17	4	NbD051427.1;NbD027041.1	NbD051427.1;NbD027041.1	1903
NaN	NaN	NaN	NaN	NaN	NaN				-1	1	1	1	6.2	6.2	6.2	36.769	0.0011342	8.1534	7280.6	18	2	NbD027060.1	NbD027060.1	1904
NaN	NaN	NaN	NaN	NaN	NaN				-1	2	1	1	12.4	8.9	8.9	24.245	0	20.495	1243900	14	7	NbD027068.1;NbD042443.1	NbD027068.1;NbD042443.1	1905
15.8555	16.8838	NaN	16.6839	15.4395	16.7802				-1	8	8	2	22.6	22.6	5.8	63.248	0	61.711	1324200	33	23	NbD027074.1;NbE44069881.1;NbD027073.1;NbE44069880.1;NbE44069539.1	NbD027074.1;NbE44069881.1;NbD027073.1;NbE44069880.1;NbE44069539.1	1906
NaN	NaN	NaN	NaN	NaN	NaN				-1	2	2	2	2.8	2.8	2.8	54.565	0	16.139	298090	25	7	NbD027077.1	NbD027077.1	1907
NaN	NaN	NaN	NaN	NaN	NaN				-1	1	1	1	1.6	1.6	1.6	61.874	0.0074516	6.1917	663580	26	3	NbD040916.1;NbE44072652.1;NbD027087.1	NbD040916.1;NbE44072652.1;NbD027087.1	1908
NaN	NaN	NaN	NaN	NaN	NaN				-1	7	1	1	24.6	4.6	4.6	54.86	0	12.446	264670	27	6	NbD027091.1	NbD027091.1	1909
16.713	16.873	16.9884	17.3718	17.2879	17.1827				-1	9	9	3	27.8	27.8	10.4	38.326	0	77.344	2640600	21	33	NbD027112.1	NbD027112.1	1910
19.4657	18.7167	19.4488	19.057	19.3448	19.0512				-1	6	6	6	16.1	16.1	16.1	51.071	0	202.77	5743400	18	25	NbD027122.1	NbD027122.1	1911
NaN	NaN	NaN	NaN	NaN	NaN				-1	2	1	1	6	3.6	3.6	55.976	0.0010929	7.7981	224070	25	5	NbD027133.1	NbD027133.1	1912
NaN	NaN	NaN	NaN	NaN	NaN				-1	6	1	1	9	1.9	1.9	100.25	0.0010749	7.6706	21586	58	1	NbD027141.1;NbE44070747.1	NbD027141.1;NbE44070747.1	1913
20.6018	20.6871	20.5844	20.6843	20.4344	20.4869				-1	21	21	9	45.5	45.5	14.9	62.357	0	298.88	25898000	32	97	NbD027186.1	NbD027186.1	1914
16.8109	17.1039	NaN	NaN	NaN	16.6151				-1	5	5	5	14.6	14.6	14.6	52.932	0	34.122	917500	29	13	NbD027213.1;NbD020869.1;NbE44072881.1;NbD005497.1;NbD050702.1;NbD043910.1	NbD027213.1	1915
19.1876	18.5591	19.0544	18.4825	18.753	18.4283				-1	5	4	4	15.4	15.4	15.4	46.197	0	67.297	3964800	18	26	NbD027300.1	NbD027300.1	1916
NaN	NaN	NaN	NaN	NaN	NaN				-1	1	1	1	3.1	3.1	3.1	67.953	0.0034976	6.6287	103770	31	3	NbE05068118.1;NbE03053449.1;NbD027318.1;NbD050515.1	NbE05068118.1;NbE03053449.1;NbD027318.1;NbD050515.1	1917
NaN	NaN	NaN	NaN	NaN	NaN				-1	1	1	1	2.8	2.8	2.8	57.296	0.0017235	7.3318	26387	22	1	NbD027324.1	NbD027324.1	1918
NaN	NaN	NaN	NaN	NaN	NaN				-1	1	1	1	10.1	10.1	10.1	18.924	0.0010957	7.8228	825710	8	8	NbD027327.1;NbD031193.1;NbE03061400.1	NbD027327.1;NbD031193.1;NbE03061400.1	1919
NaN	NaN	NaN	NaN	15.8662	16.0387				-1	11	2	2	12.1	2.5	2.5	99.242	0	14.582	264190	44	5	NbE03060088.1;NbD027331.1	NbE03060088.1;NbD027331.1	1920
16.3935	NaN	16.4062	NaN	15.9705	NaN				-1	2	2	2	10.1	10.1	10.1	41.417	0	15.683	424120	20	7	NbE03054089.1;NbD027333.1	NbE03054089.1;NbD027333.1	1921
NaN	NaN	NaN	NaN	NaN	NaN				-1	1	1	1	3.4	3.4	3.4	51.653	0.0010776	7.6733	17457	21	1	NbD027347.1	NbD027347.1	1922
NaN	NaN	NaN	NaN	NaN	NaN				-1	1	1	1	9.1	9.1	9.1	18.066	0.0017452	7.4973	24972	9	1	NbD027355.1;NbE03056179.1	NbD027355.1;NbE03056179.1	1923
NaN	NaN	NaN	NaN	NaN	NaN				-1	1	1	1	3.9	3.9	3.9	53.797	0.0044067	6.5448	83785	28	2	NbD038170.1;NbD027361.1	NbD038170.1;NbD027361.1	1924
17.1967	17.5695	17.2068	17.6496	17.1955	17.6793				-1	2	2	2	11.4	11.4	11.4	17.757	0	24.969	1464200	10	13	NbD049164.1;NbD027400.1	NbD049164.1;NbD027400.1	1925
19.1731	NaN	NaN	NaN	NaN	18.6308				-1	16	1	1	44	9.2	9.2	37.631	0	41.486	2955100	19	9	NbD027434.1	NbD027434.1	1926
16.4264	NaN	15.7787	NaN	NaN	NaN				-1	1	1	1	4.4	4.4	4.4	34.982	0	12.45	358790	14	8	NbD027440.1;NbD051544.1	NbD027440.1;NbD051544.1	1927
NaN	NaN	NaN	NaN	NaN	NaN				-1	13	1	1	31	5.4	5.4	58.58	0.004911	6.3734	17834	30	1	NbD027492.1	NbD027492.1	1928
19.1089	19.5118	19.2582	19.5545	19.2285	19.366				-1	6	6	2	17.6	17.6	10.7	17.363	0	211.07	8488200	11	30	NbD027499.1;NbD042543.1;NbE05062791.1	NbD027499.1;NbD042543.1	1929
NaN	NaN	NaN	NaN	NaN	NaN				-1	1	1	1	5.9	5.9	5.9	36.479	0.0011687	8.8031	44309	17	1	NbD027529.1	NbD027529.1	1930
NaN	NaN	NaN	NaN	NaN	NaN				-1	1	1	1	2.3	2.3	2.3	66.681	0.0016197	6.8093	54739	33	2	NbE05067455.1;NbE05066908.1;NbE03057118.1;NbD032170.1;NbD027542.1	NbE05067455.1;NbE05066908.1;NbE03057118.1;NbD032170.1;NbD027542.1	1931
NaN	NaN	NaN	16.1945	NaN	16.0689				-1	3	3	3	5.3	5.3	5.3	96.098	0	25.332	377380	41	7	NbD027559.1;NbE03060157.1;NbD027963.1	NbD027559.1;NbE03060157.1;NbD027963.1	1932
NaN	NaN	NaN	NaN	NaN	NaN				-1	29	1	1	41.6	3.4	3.4	73.785	0	17.354	77908	31	3	NbD027560.1	NbD027560.1	1933
NaN	NaN	NaN	NaN	NaN	NaN				-1	2	2	1	12.3	12.3	8.8	37.907	0	15.009	72987	20	2	NbE03057810.1;NbD042546.1;NbD027561.1;NbE05067822.1	NbE03057810.1;NbD042546.1;NbD027561.1;NbE05067822.1	1934
16.9459	16.7179	17.1847	17.2505	17.7174	17.2799				-1	3	3	3	21	21	21	25.764	0	60.481	1481800	13	18	NbE03060590.1;NbD042548.1;NbD027563.1	NbE03060590.1;NbD042548.1;NbD027563.1	1935
18.3814	18.4382	18.3586	18.74	18.6118	18.8412				-1	9	8	7	29.5	27.2	26.2	45.474	0	115.64	5715300	22	36	NbD027578.1;NbD030046.1;NbE03054884.1	NbD027578.1;NbD030046.1;NbE03054884.1	1936
NaN	NaN	NaN	NaN	NaN	NaN				-1	1	1	1	2.8	2.8	2.8	78.106	0.0017409	7.4726	86741	38	2	NbD033901.1;NbD027580.1	NbD033901.1;NbD027580.1	1937
18.3787	18.1396	18.4362	18.3277	18.4988	18.2041				-1	9	9	7	47.7	47.7	42.1	24.638	0	101.39	5927700	12	34	NbD027581.1;NbE05066442.1	NbD027581.1;NbE05066442.1	1938
NaN	NaN	NaN	NaN	NaN	NaN				-1	2	2	1	2.9	2.9	2	118.55	0	16.825	341890	46	6	NbE05065188.1;NbE44070212.1;NbD029965.1;NbD027590.1;NbD036480.1	NbE05065188.1;NbE44070212.1;NbD029965.1;NbD027590.1;NbD036480.1	1939
22.0702	22.4878	22.5266	22.9552	23.1062	23.0366				-1	6	6	3	25.1	25.1	12.3	24.747	0	213.99	119300000	11	55	NbE03060296.1;NbD027601.1	NbE03060296.1;NbD027601.1	1940
17.2783	18.2864	17.111	18.0889	16.9935	18.2969				-1	2	2	1	20.9	20.9	12.2	16.397	0	18.956	2226600	8	12	NbD040906.1;NbD027625.1	NbD040906.1;NbD027625.1	1941
20.791	20.4962	20.6304	20.447	20.7894	20.5522				-1	21	21	9	52.8	52.8	27.6	52.664	0	323.31	56018000	27	149	NbD027633.1;NbD026020.1	NbD027633.1;NbD026020.1	1942
NaN	NaN	NaN	NaN	NaN	NaN				-1	11	1	0	24.4	2.7	0	70.899	0.0011619	8.6973	218400	35	3	NbD027635.1	NbD027635.1	1943
NaN	16.4631	16.1161	16.1168	NaN	16.641				-1	4	4	4	12.5	12.5	12.5	47.279	0	38.041	856890	24	13	NbE03060446.1;NbD027659.1;NbE44073359.1;NbD018422.1;NbD047899.1;NbD007582.1	NbE03060446.1;NbD027659.1;NbE44073359.1;NbD018422.1	1944
NaN	NaN	15.798	NaN	15.8993	NaN				-1	14	2	1	49.9	8.8	3.3	47.532	0	41.908	436990	24	8	NbD027673.1	NbD027673.1	1945
16.3897	17.254	NaN	16.8686	16.2838	16.981				-1	5	5	5	5.9	5.9	5.9	119.91	0	63.948	1652300	48	18	NbD027674.1	NbD027674.1	1946
18.3773	18.2234	18.3801	18.324	18.4416	18.4269				-1	9	9	1	34.1	34.1	8.5	29.363	0	95.814	7035700	13	53	NbE05063403.1;NbD027691.1	NbE05063403.1;NbD027691.1	1947
16.8576	17.1088	16.8127	16.9854	16.7054	17.0039				-1	11	11	3	16.9	16.9	5.6	97.86	0	107.21	2240500	48	40	NbD027713.1;NbD027713.2	NbD027713.1	1948
16.7305	16.3498	16.6451	16.0407	NaN	16.012				-1	4	2	2	10.2	4.7	4.7	63.695	0	58.159	693700	25	12	NbD027728.1;NbE44070502.1	NbD027728.1	1950
NaN	NaN	NaN	NaN	NaN	NaN				-1	1	1	1	10.9	10.9	10.9	14.552	0	16.35	244190	9	6	NbE03057258.1;NbD035821.1;NbD027735.1	NbE03057258.1;NbD035821.1;NbD027735.1	1951
NaN	NaN	NaN	NaN	NaN	NaN				-1	3	3	3	14.2	14.2	14.2	29.862	0	19.688	220900	13	3	NbD035825.1;NbD027740.1	NbD035825.1;NbD027740.1	1952
NaN	NaN	NaN	NaN	NaN	NaN				-1	3	3	3	6.2	6.2	6.2	96.708	0	40.307	85833	44	4	NbE05064351.1;NbD040156.1;NbD027854.1	NbE05064351.1;NbD040156.1;NbD027854.1	1953
20.9241	20.6352	20.7326	20.2836	20.2904	20.1881				-1	10	10	10	57.8	57.8	57.8	20.122	0	260.17	22554000	11	50	NbD031860.1;NbD027868.1;NbE03059519.1;NbD031861.1	NbD031860.1;NbD027868.1;NbE03059519.1;NbD031861.1	1954
16.9587	NaN	NaN	NaN	17.0096	NaN				-1	2	2	2	25.2	25.2	25.2	12.502	0	18.058	550840	5	7	NbD027886.1;NbD039845.1;NbE03054351.1	NbD027886.1;NbD039845.1;NbE03054351.1	1955
16.7183	16.3065	16.5035	15.8934	16.5128	16.1606				-1	6	6	4	13.2	13.2	11.4	64.418	0	55.796	1394400	31	24	NbD027894.1;NbE44069469.1;NbE03059064.1;NbE05066420.1;NbD036765.1	NbD027894.1;NbE44069469.1;NbE03059064.1;NbE05066420.1;NbD036765.1	1956
NaN	NaN	NaN	NaN	NaN	NaN				-1	1	1	1	3.5	3.5	3.5	48.089	0.0016271	6.8337	20173	28	1	NbD043991.1;NbD027918.1;NbE05063330.1	NbD043991.1;NbD027918.1;NbE05063330.1	1957
NaN	NaN	NaN	NaN	NaN	NaN				-1	15	1	1	42.2	4.2	4.2	41.656	0.0010684	7.6454	315120	21	4	NbD027927.1;NbD005727.1	NbD027927.1;NbD005727.1	1958
NaN	NaN	NaN	NaN	NaN	NaN				-1	1	1	1	11.5	11.5	11.5	14.052	0.0017218	7.3221	36662	7	1	NbD027951.1	NbD027951.1	1959
NaN	17.8271	NaN	NaN	16.0392	17.6158				-1	15	2	1	22	3.3	3.3	73.461	0	14.149	1287300	29	9	NbD027995.1	NbD027995.1	1960
17.387	16.6623	17.075	16.8321	16.965	16.7988				-1	4	4	4	10.6	10.6	10.6	68.655	0	41.596	2068600	36	23	NbD047532.1;NbD027997.1;NbD015411.1;NbD036983.1	NbD047532.1;NbD027997.1	1961
NaN	NaN	NaN	NaN	NaN	NaN				-1	1	1	1	1.6	1.6	1.6	104.04	0.0017361	7.4326	62983	44	2	NbD032824.1;NbD028000.1	NbD032824.1;NbD028000.1	1962
NaN	NaN	NaN	NaN	NaN	NaN				-1	1	1	1	5	5	5	49.458	0.0016606	7.0013	104310	21	2	NbD028012.1	NbD028012.1	1963
17.1122	16.983	17.0395	16.5717	16.9044	16.5586				-1	4	4	1	48.9	48.9	16.3	14.396	0	75.359	1648900	6	24	NbD028021.1;NbE03055852.1	NbD028021.1;NbE03055852.1	1964
NaN	17.1896	NaN	17.2728	NaN	16.7815				-1	3	3	2	14.9	14.9	14.9	25.71	0	20.603	746290	10	9	NbD028041.1	NbD028041.1	1965
16.8075	17.006	NaN	16.904	17.0066	17.1319				-1	4	4	1	21.9	21.9	7.8	25.682	0	38.721	1528800	15	20	NbD028043.1	NbD028043.1	1966
17.2883	17.6151	NaN	18.1659	18.1442	17.9692				-1	15	2	2	52	4.3	4.3	40.61	0	22.437	2977300	24	21	NbD028046.1	NbD028046.1	1967
NaN	NaN	NaN	NaN	NaN	NaN				-1	1	1	1	2.4	2.4	2.4	56.547	0.0019237	6.7298	84882	24	2	NbD045470.1;NbD028057.1	NbD045470.1;NbD028057.1	1968
NaN	NaN	NaN	NaN	NaN	NaN				-1	2	2	2	4.6	4.6	4.6	66.356	0	13.866	162440	24	4	NbD028068.1;NbD052307.1	NbD028068.1;NbD052307.1	1969
NaN	NaN	NaN	NaN	NaN	NaN				-1	2	2	2	7.9	7.9	7.9	47.644	0	13.609	208420	28	5	NbD028639.1;NbE05063051.1;NbD028086.1	NbD028639.1;NbE05063051.1;NbD028086.1	1970
18.2353	17.9175	18.1293	18.0077	18.1554	17.999				-1	10	10	1	51.8	51.8	10.7	19.793	0	128.52	3554200	10	33	NbD028091.1;NbD014387.1;NbD030440.1	NbD028091.1;NbD014387.1;NbD030440.1	1971
18.7263	18.5857	18.6325	18.4418	18.6429	18.2708				-1	12	12	2	22.8	22.8	5	91.009	0	137.48	7423400	42	57	NbD028114.1	NbD028114.1	1972
19.5406	19.7562	19.6554	19.8321	19.7424	19.6677				-1	26	26	2	60.4	60.4	7.2	68.665	0	323.31	29197000	38	155	NbD028153.1	NbD028153.1	1973
19.9812	17.7312	NaN	17.9953	18.4623	16.097				-1	12	6	1	52.2	35	5	20.361	0	138.82	3154600	12	15	NbD028157.1	NbD028157.1	1974
21.2807	20.7824	21.1793	20.7806	20.9924	20.6652				-1	58	58	0	44.2	44.2	0	177.17	0	323.31	114220000	80	330	NbD028175.1	NbD028175.1	1975
NaN	NaN	NaN	NaN	NaN	NaN				-1	1	1	1	3.7	3.7	3.7	45.33	0.0010757	7.6713	156320	21	3	NbD028185.1;NbE05063934.1;NbD029620.1	NbD028185.1;NbE05063934.1;NbD029620.1	1976
17.0505	17.0812	16.7656	16.9343	16.9694	16.5714				-1	4	4	3	9.2	9.2	7.2	68.29	0	28.551	1157100	33	16	NbE05062919.1;NbD028201.1;NbD047146.1	NbE05062919.1;NbD028201.1;NbD047146.1	1977
NaN	NaN	NaN	NaN	NaN	NaN				-1	1	1	1	1.7	1.7	1.7	82.003	0.0082938	6.1521	352360	27	4	NbD028226.1	NbD028226.1	1978
NaN	NaN	NaN	NaN	NaN	NaN				-1	1	1	1	4.4	4.4	4.4	35.651	0.0016672	7.0527	62658	21	1	NbE03055486.1;NbD028229.1	NbE03055486.1;NbD028229.1	1979
17.5513	17.6757	17.7998	17.8432	17.7837	17.929				-1	3	3	3	45.6	45.6	45.6	12.365	0	27.919	2042400	8	22	NbD028243.1;NbD000461.1	NbD028243.1	1980
NaN	NaN	NaN	NaN	NaN	NaN				-1	1	1	1	11.3	11.3	11.3	20.943	0.0048825	6.3481	143710	7	4	NbD028251.1	NbD028251.1	1981
NaN	NaN	NaN	16.9499	17.0395	16.5889				-1	3	3	2	17.1	17.1	9.7	33.715	0	27.273	1171800	19	10	NbD028260.1	NbD028260.1	1982
NaN	NaN	16.5816	NaN	16.6598	NaN				-1	6	6	6	10.3	10.3	10.3	108.32	0	44.709	679160	50	12	NbE05065069.1;NbD028877.1;NbD028301.1	NbE05065069.1;NbD028877.1;NbD028301.1	1983
NaN	NaN	NaN	NaN	NaN	NaN				-1	1	1	1	11.7	11.7	11.7	13.811	0	29.106	782210	10	5	NbD028319.1	NbD028319.1	1984
NaN	NaN	NaN	NaN	NaN	NaN				-1	2	2	2	4.4	4.4	4.4	84.922	0	11.899	131690	41	4	NbE03060632.1;NbD028325.1	NbE03060632.1;NbD028325.1	1985
16.7244	17.0608	16.7012	16.8937	16.3523	16.3252				-1	7	7	6	25.2	25.2	21	39.711	0	47.247	1384000	24	21	NbD028335.1;NbD006961.1	NbD028335.1	1986
NaN	NaN	NaN	NaN	NaN	NaN				-1	3	3	1	7.6	7.6	1.9	90.869	0	19.268	85310	37	3	NbD028339.1	NbD028339.1	1987
NaN	NaN	NaN	NaN	NaN	NaN				-1	3	2	1	41.7	24.5	14.4	15.25	0	11.902	181620	9	5	NbD028345.1	NbD028345.1	1988
19.4329	19.0335	19.5289	18.5427	18.9336	18.8098				-1	6	6	5	17.6	17.6	17.6	46.501	0	62.887	5943700	20	31	NbD028348.1	NbD028348.1	1989
NaN	NaN	NaN	NaN	NaN	NaN				-1	2	2	2	10.4	10.4	10.4	35.243	0	14.768	83911	17	3	NbD028374.1;NbD041977.1	NbD028374.1;NbD041977.1	1990
NaN	NaN	17.8656	NaN	17.5813	17.2071				-1	13	2	2	50.3	10.1	10.1	41.772	0	73.633	892480	21	9	NbD028459.1;NbE03062017.1	NbD028459.1;NbE03062017.1	1991
NaN	17.2576	16.1438	16.6918	NaN	16.737				-1	6	6	1	28.6	28.6	8.1	23.339	0	41.789	1323800	12	21	NbD028502.1	NbD028502.1	1992
NaN	NaN	NaN	NaN	NaN	NaN				-1	1	1	1	3.6	3.6	3.6	29.553	0.0046729	6.4699	15508	17	1	NbE03054803.1;NbE05063505.1;NbD045567.1;NbD028519.1	NbE03054803.1;NbE05063505.1;NbD045567.1;NbD028519.1	1993
NaN	NaN	NaN	NaN	NaN	NaN				-1	1	1	1	3.6	3.6	3.6	38.005	0.0046555	6.4554	134400	16	3	NbD028524.1	NbD028524.1	1994
NaN	NaN	NaN	NaN	NaN	NaN				-1	2	2	2	10.5	10.5	10.5	42.94	0	13.811	682660	16	7	NbD028536.1;NbE44073566.1	NbD028536.1;NbE44073566.1	1995
18.3966	17.9944	18.2587	18.0423	18.4343	18.3449				-1	13	13	7	21.3	21.3	11.6	58.466	0	126.13	4724600	27	37	NbD028560.1	NbD028560.1	1996
18.0935	19.0431	18.127	19.1699	NaN	19.0117				-1	3	3	2	23.8	23.8	13.9	13.628	0	26.078	2656800	7	13	NbD029200.1;NbD028565.1	NbD029200.1;NbD028565.1	1997
NaN	NaN	NaN	17.0205	NaN	16.614				-1	1	1	1	11.1	11.1	11.1	14.219	0.0010881	7.7553	358220	5	5	NbD032660.1;NbD029198.1;NbD028569.1	NbD032660.1;NbD029198.1;NbD028569.1	1998
NaN	NaN	16.2953	NaN	16.2232	NaN				-1	13	3	3	31.7	6.7	6.7	56.132	0	20.453	557820	28	10	NbD028572.1	NbD028572.1	1999
NaN	NaN	NaN	NaN	NaN	NaN				-1	1	1	1	2.7	2.7	2.7	72.843	0.0017135	7.2798	37129	30	2	NbD028579.1	NbD028579.1	2000
NaN	NaN	NaN	NaN	NaN	NaN				-1	1	1	1	4.1	4.1	4.1	35.868	0.0017385	7.46	127300	15	3	NbE44069368.1;NbE05067373.1;NbD028661.1	NbE44069368.1;NbE05067373.1;NbD028661.1	2001
18.674	17.929	18.712	17.5474	18.2681	17.659				-1	7	7	6	56.3	56.3	56.3	16.584	0	80.79	3381100	11	25	NbD028672.1;NbE44069748.1;NbE03060915.1;NbD019851.1;NbE05068508.1	NbD028672.1;NbE44069748.1;NbE03060915.1	2002
18.5959	18.8303	18.3152	18.7304	17.9768	NaN				-1	6	2	2	22.4	11.2	11.2	25.383	0	22.805	2402300	13	12	NbD028682.1;NbD039002.1;NbD033986.1	NbD028682.1;NbD039002.1	2003
NaN	NaN	NaN	NaN	NaN	NaN				-1	1	1	1	9.6	9.6	9.6	17.866	0.0011394	8.2557	176000	8	4	NbD028688.1	NbD028688.1	2004
NaN	NaN	NaN	NaN	NaN	NaN				-1	3	3	3	18.2	18.2	18.2	31.035	0	23.176	238210	11	6	NbE05065936.1;NbD049935.1;NbD028694.1	NbE05065936.1;NbD049935.1;NbD028694.1	2005
18.7344	18.5658	18.7339	18.383	18.5383	18.3163				-1	9	9	8	21.3	21.3	21.3	61.907	0	69.1	3756100	31	30	NbD028706.1	NbD028706.1	2006
19.2311	19.0697	19.1523	18.7919	18.736	18.5677				-1	25	25	2	36	36	2	93.078	0	285.43	14717000	40	103	NbD028722.1	NbD028722.1	2007
NaN	NaN	NaN	NaN	NaN	NaN				-1	1	1	1	12.4	12.4	12.4	12.715	0.0046182	6.3964	21835	4	1	NbD028755.1	NbD028755.1	2008
NaN	NaN	NaN	NaN	NaN	NaN				-1	1	1	1	6.3	6.3	6.3	34.212	0.0016491	6.9272	62306	15	4	NbD028756.1	NbD028756.1	2009
NaN	NaN	NaN	NaN	NaN	NaN				-1	1	1	1	6.4	6.4	6.4	19.92	0.0046154	6.393	196110	15	5	NbE03062052.1;NbD028773.1	NbE03062052.1;NbD028773.1	2010
17.0432	17.0027	17.5746	17.5321	17.7906	17.3441				-1	4	4	4	8.4	8.4	8.4	68.228	0	32.173	1914700	40	23	NbD028787.1;NbD042866.1;NbE44072235.1;NbD008205.1	NbD028787.1;NbD042866.1;NbE44072235.1;NbD008205.1	2011
NaN	NaN	NaN	NaN	NaN	NaN				-1	1	1	1	1.5	1.5	1.5	76.815	0.0046642	6.4649	30755	45	1	NbD028847.1;NbD038704.1;NbE05062762.1	NbD028847.1;NbD038704.1;NbE05062762.1	2012
15.9119	NaN	15.6759	NaN	15.9541	NaN				-1	8	2	2	22.3	9.8	9.8	46.717	0	15.537	276200	21	6	NbE03053664.1;NbE44072031.1;NbD028858.1	NbE03053664.1;NbE44072031.1;NbD028858.1	2013
16.7636	16.5202	16.6763	16.5893	16.7173	16.4552				-1	7	7	7	27.4	27.4	27.4	48.588	0	53.841	1864700	26	28	NbD028860.1;NbD048388.1	NbD028860.1;NbD048388.1	2014
18.5856	18.4866	18.8047	18.2432	18.5526	18.178				-1	5	5	5	10.4	10.4	10.4	24.563	0	63.341	5550600	11	36	NbD028865.1;NbD005771.1	NbD028865.1;NbD005771.1	2015
NaN	NaN	NaN	NaN	NaN	NaN				-1	1	1	1	3.4	3.4	3.4	68.754	0.0010612	7.6113	135880	27	3	NbD028870.1	NbD028870.1	2016
NaN	NaN	NaN	NaN	NaN	NaN				-1	1	1	1	9.7	9.7	9.7	17.629	0.0011346	8.1701	105500	7	3	NbD028891.1	NbD028891.1	2017
NaN	NaN	NaN	NaN	NaN	NaN				-1	1	1	1	5	5	5	30.542	0.0011017	7.8761	60054	9	2	NbE03061376.1;NbD028899.1	NbE03061376.1;NbD028899.1	2018
17.1587	17.5641	17.8206	18.0466	18.363	18.2292				-1	8	8	1	25.3	25.3	5.2	39.947	0	101.3	4656800	20	39	NbD028931.1	NbD028931.1	2019
NaN	NaN	NaN	NaN	NaN	NaN				-1	5	1	1	23.3	6	6	34.451	0	17.521	314970	11	3	NbD028938.1	NbD028938.1	2020
NaN	NaN	NaN	NaN	NaN	NaN				-1	1	1	1	1.1	1.1	1.1	153.8	0.0017289	7.3593	45381	69	2	NbE05064812.1;NbD028942.1	NbE05064812.1;NbD028942.1	2021
NaN	NaN	NaN	NaN	NaN	NaN				-1	1	1	1	3.3	3.3	3.3	40.26	0.0031827	6.6513	115340	16	3	NbD053036.1;NbD028948.1	NbD053036.1;NbD028948.1	2022
NaN	NaN	NaN	NaN	NaN	NaN				-1	2	2	2	4.1	4.1	4.1	89.825	0	11.837	82430	35	2	NbD028963.1;NbD051782.1	NbD028963.1;NbD051782.1	2023
NaN	NaN	NaN	NaN	NaN	NaN				-1	2	2	2	6.1	6.1	6.1	62.494	0	11.746	105430	25	2	NbE44069502.1;NbE03056121.1;NbD044019.1;NbD028976.1	NbE44069502.1;NbE03056121.1;NbD044019.1;NbD028976.1	2024
NaN	15.405	NaN	15.8151	NaN	NaN				-1	3	3	3	3.7	3.7	3.7	82.911	0	19.036	267140	36	6	NbE03059680.1;NbD044016.1;NbD028981.1	NbE03059680.1;NbD044016.1;NbD028981.1	2025
NaN	NaN	NaN	NaN	NaN	NaN				-1	9	1	1	13.6	2.4	2.4	107	0.0054678	6.3245	9431.3	38	1	NbD029050.1	NbD029050.1	2026
NaN	NaN	NaN	NaN	NaN	NaN				-1	10	6	5	42	26.2	22.2	36.13	0	51.673	611290	21	9	NbD029059.1;NbE44070987.1;NbD016233.1	NbD029059.1;NbE44070987.1;NbD016233.1	2027
NaN	16.1245	15.3087	NaN	NaN	NaN				-1	2	2	2	1.8	1.8	1.8	236.38	0	18.192	293750	119	6	NbD029079.1	NbD029079.1	2028
NaN	NaN	NaN	NaN	NaN	NaN				-1	3	3	3	17.6	17.6	17.6	31.902	0	21.627	1661400	17	9	NbD029086.1;NbE44072731.1	NbD029086.1	2029
NaN	NaN	NaN	NaN	NaN	NaN				-1	2	2	1	7.9	7.9	3.1	53.88	0.0012111	9.9498	25823	24	1	NbD029092.1;NbE03059723.1;NbD011282.1	NbD029092.1;NbE03059723.1;NbD011282.1	2030
NaN	NaN	NaN	NaN	NaN	NaN				-1	10	5	2	43.9	26.6	15	34.54	0	81.493	1189600	11	11	NbD029126.1;NbE03060847.1;NbE44070740.1	NbD029126.1;NbE03060847.1;NbE44070740.1	2031
18.2354	18.4673	17.9571	18.0834	17.8152	18.0582				-1	14	14	5	21.6	21.6	7.4	93.674	0	122.58	4773400	42	46	NbD029169.1	NbD029169.1	2032
16.3687	16.8574	NaN	16.7823	16.3251	16.879				-1	3	3	3	5.8	5.8	5.8	103.29	0	32.608	959620	43	13	NbE05063989.1;NbD029170.1;NbE44074610.1	NbE05063989.1;NbD029170.1;NbE44074610.1	2033
NaN	NaN	NaN	NaN	NaN	NaN				-1	1	1	1	4.4	4.4	4.4	37.49	0.0011211	8.0246	115880	13	2	NbD029194.1	NbD029194.1	2034
18.9195	18.2748	18.7252	18.1378	18.6686	17.8506				-1	14	14	4	37.1	37.1	11.5	48.855	0	202.26	7544700	24	55	NbD029218.1;NbD017482.1;NbD026146.1;NbE03057627.1	NbD029218.1;NbD017482.1;NbD026146.1;NbE03057627.1	2035
NaN	16.6472	NaN	17.1526	16.2361	16.8269				-1	7	4	1	29.2	18.9	6	34.552	0	51.019	834450	11	14	NbD029230.1	NbD029230.1	2036
NaN	NaN	NaN	NaN	NaN	NaN				-1	1	1	1	3	3	3	45.726	0.0016556	6.9571	49933	27	1	NbD029253.1	NbD029253.1	2038
NaN	17.3377	NaN	17.7027	NaN	17.4586				-1	7	4	4	40.7	21.7	21.7	24.997	0	33.364	1213300	9	14	NbD029254.1;NbD013675.1;NbD029639.1;NbD028194.1	NbD029254.1;NbD013675.1	2039
NaN	NaN	NaN	NaN	NaN	NaN				-1	2	2	1	7.9	7.9	4.3	44.053	0	12.18	136660	13	6	NbD030889.1;NbD029265.1	NbD030889.1;NbD029265.1	2040
[truncated: 1,407 more rows]

## Sheet: only detected in CC1
Proteins only detected in samples from PafA-CC1
LFQ intensity Lti6B_rep1	LFQ intensity CC1_rep1	LFQ intensity Lti6B_rep2	LFQ intensity CC1_rep2	LFQ intensity Lti6B_rep3	LFQ intensity CC1_rep3	Count
	+		+		+	51
Protein IDs	Majority protein IDs	id
CC1;NbE03054282.1;NbD031486.1;NbD007210.1;NbD029431.1;NbD010955.1	CC1	0
NbD000685.1;NbD039151.1;NbE44073367.1;NbD022542.1;NbD013300.1	NbD000685.1	41
NbD001463.1	NbD001463.1	109
NbD001576.1;NbD030371.1;NbD047493.1	NbD001576.1;NbD030371.1	118
NbD001875.1	NbD001875.1	144
NbE05065529.1;NbD049487.1;NbD002186.1	NbE05065529.1;NbD049487.1;NbD002186.1	172
NbE03061602.1;NbD034105.1;NbD002350.1;NbD034452.1;NbD022342.1;NbD012412.1	NbE03061602.1;NbD034105.1;NbD002350.1	186
NbD002695.1;NbE03058227.1;NbD011024.1	NbD002695.1;NbE03058227.1;NbD011024.1	214
NbD003577.1	NbD003577.1	282
NbD051686.1;NbD029155.1;NbD012968.1;NbD006401.1;NbD004560.1;NbD000411.1	NbD051686.1;NbD029155.1;NbD012968.1;NbD006401.1;NbD004560.1;NbD000411.1	368
NbD005697.1;NbD032078.1	NbD005697.1;NbD032078.1	465
NbD047299.1;NbD009246.1;NbE05068277.1;NbD028703.1;NbD052869.1	NbD047299.1;NbD009246.1	743
NbD051522.1;NbD009556.1;NbE05067371.1	NbD051522.1;NbD009556.1;NbE05067371.1	772
NbD051328.1;NbD010019.1;NbE44073779.1;NbD045773.1	NbD051328.1;NbD010019.1;NbE44073779.1;NbD045773.1	807
NbD010380.1;NbE03056446.1;NbD050711.1;NbE03056589.1;NbD034684.1	NbD010380.1;NbE03056446.1;NbD050711.1	830
NbD046455.1;NbD011528.1	NbD046455.1;NbD011528.1	927
NbD013589.1;NbD011813.1	NbD013589.1;NbD011813.1	952
NbD011824.1;NbD051455.1	NbD011824.1;NbD051455.1	954
NbD011846.1	NbD011846.1	957
NbD012857.1;NbE05064745.1	NbD012857.1;NbE05064745.1	1024
NbE03059398.1;NbD015589.1;NbE03056530.1;NbD036129.1	NbE03059398.1;NbD015589.1;NbE03056530.1;NbD036129.1	1204
NbD017089.1;NbD037627.1;NbE03056336.1;NbD005240.1;NbD033219.1;NbD007127.1	NbD017089.1;NbD037627.1;NbE03056336.1;NbD005240.1;NbD033219.1;NbD007127.1	1301
NbD029515.1;NbD021082.1	NbD029515.1;NbD021082.1	1555
NbE44070891.1;NbE05067221.1;NbD021939.1;NbD036437.1;NbE05062901.1	NbE44070891.1;NbE05067221.1;NbD021939.1;NbD036437.1;NbE05062901.1	1613
NbD022579.1	NbD022579.1	1644
NbD024229.1;NbE03058726.1;NbD040166.1	NbD024229.1;NbE03058726.1;NbD040166.1	1740
NbD041660.1;NbD025747.1;NbD003671.1;NbD035048.1;NbE44073896.1;NbE03059798.1;NbD045221.1;NbD035877.1	NbD041660.1;NbD025747.1;NbD003671.1;NbD035048.1;NbE44073896.1;NbE03059798.1;NbD045221.1;NbD035877.1	1837
NbD026973.1;NbE44072469.1;NbE44071949.1	NbD026973.1	1896
NbD028041.1	NbD028041.1	1965
NbD029254.1;NbD013675.1;NbD029639.1;NbD028194.1	NbD029254.1;NbD013675.1	2039
NbD030449.1	NbD030449.1	2107
NbD032444.1;NbD031729.1	NbD032444.1;NbD031729.1	2231
NbD035909.1;NbE44074431.1	NbD035909.1;NbE44074431.1	2417
NbD038514.1	NbD038514.1	2565
NbD038769.1;NbE03054733.1;NbD020550.1	NbD038769.1;NbE03054733.1;NbD020550.1	2583
NbD039501.1;NbE44073927.1;NbE44073928.1;NbE05066055.1;NbE03061312.1;NbD045284.1	NbD039501.1;NbE44073927.1;NbE44073928.1;NbE05066055.1;NbE03061312.1;NbD045284.1	2629
NbD045703.1	NbD045703.1	2924
NbD046535.1	NbD046535.1	2971
NbD047153.1	NbD047153.1	3001
NbD049531.1	NbD049531.1	3116
NbD049767.1	NbD049767.1	3127
NbE05063196.1;NbE44072747.1;NbD050407.1	NbE05063196.1;NbE44072747.1;NbD050407.1	3161
NbE05065401.1;NbE03053546.1;NbD040490.1;NbD028467.1	NbE05065401.1;NbE03053546.1;NbD040490.1;NbD028467.1	3287
NbE03055723.1	NbE03055723.1	3318
NbE03057920.1;NbD016263.1	NbE03057920.1;NbD016263.1	3344
NbE03061162.1	NbE03061162.1	3384
NbE05063856.1	NbE05063856.1	3398
NbE05065846.1	NbE05065846.1	3419
NbE05066076.1;NbE44069764.1;NbD013686.1;NbD023126.1	NbE05066076.1;NbE44069764.1;NbD013686.1	3426
NbE05068445.1;NbE44070308.1;NbD028663.1;NbE05063704.1;NbD027281.1;NbD028575.1;NbD028578.1;NbE05067372.1	NbE05068445.1;NbE44070308.1;NbD028663.1	3451
NbE44072724.1;NbD010523.1;NbE03059353.1;NbD037799.1;NbE03054775.1;NbD008703.1;NbE03060937.1;NbD022046.1;NbE03053462.1;NbD025290.1;NbD020753.1;NbD041473.1;NbE03053849.1;NbD048954.1;NbD037649.1;NbE03060110.1;NbE03062092.1;NbD028599.1;NbE03054732.1;NbD007208.1;NbD026584.1;NbD031488.1;NbE05067014.1;NbD042217.1;NbD040263.1;NbD039513.1;NbE03062235.1;NbD012576.1;NbD027610.1;NbD031755.1;NbD041958.1;NbE05…	NbE44072724.1;NbD010523.1;NbE03059353.1;NbD037799.1;NbE03054775.1;NbD008703.1;NbE03060937.1	3479

## Sheet: imputation and t-test
a two-sided t-test for comparison between samples from PafA-CC1 and PafA-LTI6B, with corrected false positive by permutation-based FDR calculation using thresholds FDR = 0.05 and S0 = 1.
Significant	#NAME?	Difference	Protein IDs	Majority protein IDs	id	Symbol color	Symbol type	Symbol size	Show label	Only identified by site	Reverse	Potential contaminant	Taxonomy IDs	Peptides	Razor + unique peptides	Unique peptides	Sequence coverage [%]	Unique + razor sequence coverage [%]	Unique sequence coverage [%]	Mol. weight [kDa]	Q-value	Score	Intensity	iBAQ peptides	MS/MS count	LFQ intensity Lti6B_rep1	LFQ intensity CC1_rep1	LFQ intensity Lti6B_rep2	LFQ intensity CC1_rep2	LFQ intensity Lti6B_rep3	LFQ intensity CC1_rep3
+	4.45389	7.13414	CC1;NbE03054282.1;NbD031486.1;NbD007210.1;NbD029431.1;NbD010955.1	CC1	0	Color2 [DarkGray]	1	4					-1	10	10	9	45	45	37.4	37.201	0	259.69	35674000	16	36	15.4746	22.3425	15.5796	22.2367	14.4799	22.3573
+	4.53658	4.31443	NbD035909.1;NbE44074431.1	NbD035909.1;NbE44074431.1	2417	Color2 [DarkGray]	1	4					-1	31	31	19	21.8	21.8	14.7	188.16	0	323.31	12093000	86	70	15.0041	19.1974	15.0417	19.0543	14.4284	19.1658
+	4.27898	4.0768	NbD002583.1;NbD005526.1;NbE05068690.1	NbD002583.1;NbD005526.1;NbE05068690.1	203	Color2 [DarkGray]	1	4					-1	14	14	14	19.3	19.3	19.3	100.32	0	159.62	4841900	50	46	14.8907	18.4518	14.1842	18.5548	14.3015	18.6001
+	3.15198	3.76695	NbD049767.1	NbD049767.1	3127	Color2 [DarkGray]	1	4					-1	4	4	1	49.2	49.2	15.3	12.967	0	72.76	2675200	10	16	15.7279	18.8375	14.4842	18.6028	14.6226	18.6952
+	2.35756	3.64657	NbD049638.1	NbD049638.1	3122	Color2 [DarkGray]	1	4					-1	3	3	1	14.3	14.3	3.6	44.7	0	26.938	2518000	20	13	14.0599	17.7434	15.8081	18.775	14.4388	18.7281
+	3.27738	3.4432	NbD051686.1;NbD029155.1;NbD012968.1;NbD006401.1;NbD004560.1;NbD000411.1	NbD051686.1;NbD029155.1;NbD012968.1;NbD006401.1;NbD004560.1;NbD000411.1	368	Color2 [DarkGray]	1	4					-1	4	4	4	53.8	53.8	53.8	7.4666	0	32.414	2203400	3	21	15.199	17.9272	14.083	18.2838	14.701	18.1016
+	2.44858	3.4222	NbD040723.1;NbD038952.1;NbD023008.1;NbE03060405.1	NbD040723.1;NbD038952.1;NbD023008.1	2597	Color2 [DarkGray]	1	4					-1	16	16	13	18	18	16.6	121.79	0	249.15	6058500	50	53	14.3566	18.981	16.1066	18.3417	14.9356	18.3427
+	3.38041	3.36519	NbE05065906.1	NbE05065906.1	3420	Color2 [DarkGray]	1	4					-1	20	20	6	40.2	40.2	15.2	73.021	0	224.67	4564800	37	41	15.2912	18.6723	14.8234	17.9637	15.277	18.8512
+	3.2122	3.27374	NbD045703.1	NbD045703.1	2924	Color2 [DarkGray]	1	4					-1	10	2	2	33.1	8.9	8.9	44.698	0	39.861	1810700	19	12	14.5539	18.5733	15.6406	18.2662	15.0253	18.2014
+	5.54068	3.19169	NbE03057920.1;NbD016263.1	NbE03057920.1;NbD016263.1	3344	Color2 [DarkGray]	1	4					-1	6	6	2	12.4	12.4	5.2	75.331	0	82.175	1368000	39	13	14.913	17.94	14.7471	18.0432	14.6604	17.9125
+	2.38586	3.11299	NbE05062828.1;NbD001515.1;NbE03055700.1;NbE05064761.1;NbE05063836.1;NbD028343.1;NbD021822.1	NbE05062828.1;NbD001515.1	116	Color2 [DarkGray]	1	4					-1	17	17	3	14.3	14.3	2.4	186.64	0	148.65	4318400	92	44	15.0043	18.9382	15.629	19.0843	15.6105	17.5603
+	3.18195	3.06676	NbD001576.1;NbD030371.1;NbD047493.1	NbD001576.1;NbD030371.1	118	Color2 [DarkGray]	1	4					-1	8	8	5	32.1	32.1	24.2	37.6	0	66.474	1947100	16	22	14.6042	18.0054	15.3818	17.7775	14.3543	17.7577
+	3.95516	2.97052	NbE44070891.1;NbE05067221.1;NbD021939.1;NbD036437.1;NbE05062901.1	NbE44070891.1;NbE05067221.1;NbD021939.1;NbD036437.1;NbE05062901.1	1613	Color2 [DarkGray]	1	4					-1	16	16	16	10.2	10.2	10.2	219.8	0	123.2	3069000	112	37	15.1753	17.8628	14.5025	17.8289	14.8984	17.796
+	4.29563	2.91001	NbE05063856.1	NbE05063856.1	3398	Color2 [DarkGray]	1	4					-1	16	3	0	12.5	1.9	0	192.54	0	25.486	1796900	94	10	15.2776	18.0439	15.5776	18.3863	15.2616	18.4166
+	2.65523	2.84154	NbD018551.1;NbD013071.1	NbD018551.1	1395	Color2 [DarkGray]	1	4					-1	8	8	5	19	19	11.1	54.177	0	88.436	3306200	31	26	15.4132	18.4213	16.219	18.9218	16.4751	19.2888
+	2.60828	2.79838	NbD047153.1	NbD047153.1	3001	Color2 [DarkGray]	1	4					-1	11	3	3	33	12.4	12.4	41.986	0	26.703	902120	21	10	14.8278	17.3553	15.0821	17.2243	13.7581	17.4836
+	3.42361	2.76428	NbE05064444.1;NbD048267.1	NbE05064444.1;NbD048267.1	3401	Color2 [DarkGray]	1	4					-1	28	26	9	22.3	20.7	8.5	202.44	0	323.31	11224000	95	74	17.2337	19.7446	17.2262	19.7176	16.4833	19.7737
+	4.01073	2.72792	NbD011824.1;NbD051455.1	NbD011824.1;NbD051455.1	954	Color2 [DarkGray]	1	4					-1	6	1	1	23.3	5.8	5.8	30.037	0	16.98	1553600	15	13	14.8898	17.8601	15.2556	17.6175	14.7432	17.5948
+	3.45809	2.59462	NbD046535.1	NbD046535.1	2971	Color2 [DarkGray]	1	4					-1	38	2	2	44.1	2.4	2.4	80.164	0	16.385	1360800	34	12	14.4872	17.3914	15.2445	17.3769	14.6587	17.406
+	6.57761	2.57378	NbE05065846.1	NbE05065846.1	3419	Color2 [DarkGray]	1	4					-1	8	8	2	33.6	33.6	14.5	24.912	0	81.603	1932900	7	22	14.8734	17.4053	14.8097	17.4706	14.8309	17.3594
+	3.39498	2.54835	NbD029515.1;NbD021082.1	NbD029515.1;NbD021082.1	1555	Color2 [DarkGray]	1	4					-1	3	3	2	8.2	8.2	6.2	50.706	0	18.985	952060	20	9	15.067	17.1815	14.9464	17.282	14.4805	17.6754
+	3.49228	2.50207	NbD013589.1;NbD011813.1	NbD013589.1;NbD011813.1	952	Color2 [DarkGray]	1	4					-1	3	3	3	11.9	11.9	11.9	29.428	0	30.538	976390	13	11	15.2343	17.9474	15.3359	17.5809	14.8555	17.4036
+	4.03346	2.46971	NbD029254.1;NbD013675.1;NbD029639.1;NbD028194.1	NbD029254.1;NbD013675.1	2039	Color2 [DarkGray]	1	4					-1	7	4	4	40.7	21.7	21.7	24.997	0	33.364	1213300	9	14	14.8448	17.3377	15.0105	17.7027	15.2346	17.4586
+	3.94324	2.45887	NbD039501.1;NbE44073927.1;NbE44073928.1;NbE05066055.1;NbE03061312.1;NbD045284.1	NbD039501.1;NbE44073927.1;NbE44073928.1;NbE05066055.1;NbE03061312.1;NbD045284.1	2629	Color2 [DarkGray]	1	4					-1	4	4	4	11	11	11	66.832	0	30.757	948670	32	13	14.5121	16.8155	14.392	17.083	14.8007	17.1829
+	3.6162	2.33965	NbD029921.1	NbD029921.1	2079	Color2 [DarkGray]	1	4					-1	9	9	9	28.2	28.2	28.2	58.224	0	79.046	2332300	29	30	15.7092	17.9697	16.0618	18.1854	15.448	18.0828
+	4.88132	-2.29193	NbE03059085.1;NbD013388.1;NbD025965.1;NbE05063796.1	NbE03059085.1;NbD013388.1	1067	Color2 [DarkGray]	1	4					-1	50	50	13	25.4	25.4	9.4	162.04	0	323.31	35862000	63	197	20.1754	18.0703	20.2497	17.9744	20.2855	17.79
+	5.21361	-2.5232	NbD010469.1;NbE03060628.1;NbD018279.1	NbD010469.1;NbE03060628.1;NbD018279.1	838	Color2 [DarkGray]	1	4					-1	6	6	5	18.8	18.8	13.7	47.02	0	42.672	836650	20	11	17.2481	14.5041	17.0918	14.6414	17.0375	14.6623
+	3.44632	-2.55208	NbD004650.1	NbD004650.1	378	Color2 [DarkGray]	1	4					-1	11	10	6	28.6	24.1	14.2	53.336	0	130.98	3162900	25	35	17.9839	15.3159	17.7709	15.614	17.7153	14.8839
+	3.92039	-2.5701	NbE44070239.1	NbE44070239.1	3463	Color2 [DarkGray]	1	4					-1	19	19	3	41.3	41.3	9.8	61.959	0	247.35	10199000	29	78	19.1965	16.9499	19.3108	16.4248	19.096	16.5184
+	3.64635	-2.59933	NbE05068561.1;NbE03054120.1;NbD016059.1;NbD005628.1;NbD004837.1;NbD051702.1;NbD031249.1;NbE03057031.1	NbE05068561.1;NbE03054120.1;NbD016059.1;NbD005628.1;NbD004837.1;NbD051702.1;NbD031249.1;NbE03057031.1	1229	Color2 [DarkGray]	1	4					-1	2	2	2	7	7	7	31.812	0	16.366	1805100	7	9	17.9096	15.3473	17.7633	14.8355	17.4271	15.1192
+	3.5479	-2.62072	NbE03059924.1;NbD049748.1;NbD015350.1	NbE03059924.1;NbD049748.1	3125	Color2 [DarkGray]	1	4					-1	11	11	11	15.2	15.2	15.2	91.442	0	101.69	2818700	45	33	17.9569	14.8867	17.774	15.0411	17.58	15.5208
+	3.92107	-2.64794	NbD038535.1	NbD038535.1	2566	Color2 [DarkGray]	1	4					-1	8	8	8	17.6	17.6	17.6	77.622	0	58.813	2363800	30	26	17.3007	15.034	17.2708	14.5785	17.5739	14.5892
+	5.12528	-2.70851	NbE05065534.1;NbD047195.1	NbE05065534.1;NbD047195.1	3005	Color2 [DarkGray]	1	4					-1	32	17	17	32.7	17.8	17.8	131.13	0	218.3	4145300	56	52	18.055	15.3824	18.0787	15.1856	17.856	15.2963
+	4.90146	-2.82311	NbE03056327.1;NbD008897.1	NbE03056327.1;NbD008897.1	718	Color2 [DarkGray]	1	4					-1	20	20	5	36.4	36.4	8.3	58.543	0	228.43	5327700	29	71	17.8315	15.2987	17.996	15.0847	18.0227	14.9975
+	3.63974	-2.94265	NbD022422.1	NbD022422.1	1636	Color2 [DarkGray]	1	4					-1	16	6	1	45.9	19.1	4.6	43.263	0	54.06	2269400	21	14	18.2532	15.6239	18.228	15.1496	17.9948	14.8747
+	3.49558	-3.12238	NbD014333.1;NbD019850.1	NbD014333.1	1128	Color2 [DarkGray]	1	4					-1	6	6	6	19.2	19.2	19.2	36.836	0	51.878	1903000	18	14	18.8273	15.1448	18.5189	15.3616	18.5018	15.9745
+	2.60601	-3.17793	NbD007402.1;NbD041417.1	NbD007402.1;NbD041417.1	594	Color2 [DarkGray]	1	4					-1	6	6	6	19.3	19.3	19.3	42.287	0	42.246	1552100	21	15	18.2338	14.7807	17.6852	15.7469	18.6191	14.4768
+	2.24105	-3.20966	NbD040798.1	NbD040798.1	2686	Color2 [DarkGray]	1	4					-1	6	6	4	57.5	57.5	27.6	15.043	0	42.078	2223900	8	20	18.8915	15.9301	18.359	14.7911	17.5439	14.4444
+	3.57536	-3.28199	NbE03058537.1;NbD028380.1;NbD016867.1	NbE03058537.1;NbD028380.1;NbD016867.1	1286	Color2 [DarkGray]	1	4					-1	3	3	3	5.9	5.9	5.9	58.268	0	24.272	1119600	23	9	18.1846	15.0083	18.1122	15.0282	17.8508	14.2651
+	3.71549	-3.34723	NbE05067840.1;NbD022489.1;NbD007198.1	NbE05067840.1;NbD022489.1;NbD007198.1	576	Color2 [DarkGray]	1	4					-1	3	3	3	18.1	18.1	18.1	30.826	0	31.874	1209800	15	9	18.4908	14.8633	18.3327	15.4351	18.1606	14.644
+	4.71694	-3.41901	NbD030306.1;NbE44072353.1;NbE05063872.1;NbD042850.1;NbD046992.1;NbD028382.1;NbE03061547.1	NbD030306.1;NbE44072353.1;NbE05063872.1;NbD042850.1;NbD046992.1;NbD028382.1;NbE03061547.1	2096	Color2 [DarkGray]	1	4					-1	3	3	3	30.1	30.1	30.1	8.7873	0	42.869	1591200	3	12	18.3846	14.6174	18.3257	15.028	18.1513	14.9592
+	3.21459	-3.4222	NbE44069675.1;NbD005279.1;NbE44069674.1;NbE05062720.1;NbD005280.1;NbE05062719.1	NbE44069675.1	3462	Color2 [DarkGray]	1	4					-1	4	4	4	6.3	6.3	6.3	89.814	0	27.777	1348800	37	11	18.5349	15.0822	18.0826	14.639	17.6389	14.2687
+	3.61065	-3.62007	NbD041435.1;NbE44071593.1;NbD020002.1	NbD041435.1;NbE44071593.1;NbD020002.1	2712	Color2 [DarkGray]	1	4					-1	5	5	5	13.7	13.7	13.7	54.071	0	56.294	8764800	28	28	20.0819	16.4214	19.7061	15.8372	20.0734	16.7425
+	5.35216	-3.63507	NbD026018.1	NbD026018.1	1849	Color2 [DarkGray]	1	4					-1	12	12	2	26	26	4.3	70.665	0	145.18	4325700	35	29	18.7698	15.1036	18.5181	14.9149	18.5254	14.8895
+	5.35711	-3.88435	NbE03059408.1;NbD052200.1	NbE03059408.1;NbD052200.1	3243	Color2 [DarkGray]	1	4					-1	33	33	17	35.1	35.1	21.2	132.01	0	323.31	7344600	57	102	18.0879	14.3652	18.0666	14.2627	18.1133	13.9868
+	3.61676	-3.94294	NbD033937.1;NbE03059671.1	NbD033937.1;NbE03059671.1	2326	Color2 [DarkGray]	1	4					-1	13	6	5	46	27.2	27.2	24.45	0	139.22	4252300	12	18	19.3941	14.7222	18.912	15.2261	18.4171	14.9461
+	3.34742	-3.97716	NbD023989.1	NbD023989.1	1730	Color2 [DarkGray]	1	4					-1	3	3	3	10.1	10.1	10.1	55.252	0	33.862	1530200	23	7	18.9691	14.0027	18.5996	14.9479	18.3004	14.9871
+	3.56425	-4.02335	NbD029904.1;NbD038672.1	NbD029904.1	2078	Color2 [DarkGray]	1	4					-1	19	19	18	35.8	35.8	35.5	73.884	0	182.72	5232600	35	44	18.6742	15.0255	18.6327	13.9442	18.5612	14.8285
+	3.36785	-4.19373	NbD003599.1	NbD003599.1	286	Color2 [DarkGray]	1	4					-1	10	10	2	59.3	59.3	12.8	24.646	0	130.24	6543600	14	32	19.014	14.8723	19.0635	15.5431	19.1108	14.1917
+	2.87668	-4.96254	NbD007119.1	NbD007119.1	568	Color2 [DarkGray]	1	4					-1	19	19	1	36.2	36.2	2.5	58.811	0	196.96	21269000	24	70	21.1875	17.2544	21.7577	17.1549	21.7911	15.4393
+	5.49304	-6.76584	NbD032899.1	NbD032899.1	2265	Color2 [DarkGray]	1	4					-1	20	20	12	71.7	71.7	53.5	25.02	0	323.31	49413000	14	99	21.6008	14.8605	21.6735	15.2209	21.7018	14.5972

## Sheet: Combined ID and sequence
Proteins in PafA-CC1 exclusive or with significant enrichment were combined
ID	annotation	p_seq
NbD000685.1	vacuolar protein sorting-associated protein 35A-like (XP_019256057.1)	MIPNGVEDEEKFLAAGIAGLQQNAFYMHRALDSNNLKDALKYSAQMLSELRTSRLSPHKYYELYMRAFDELRKLQIFFKEETKRGCSIVDLYELVQHAGNILPRLYLLCTVGSVYIKSKEAPARDILKDLVEMCRGIQHPLRGLFLRSYLSQVSKDKLPDIGSEYEGDAETVVDAVEFVLQNFTEMNKLWVRMQHQGPAREKEKREKERSELRDLVGKNLHVLSQIEGIDLEMYKETVLPRILEQVVNCKDEIAQGYLMDCIIQVFPDEYHLQTLETLLGACPQLQPSVDIKMVLARLMERLSNYAALSTDVLPEFFQVEAFAKLNNAIGKVIEAQEDMPIVGVVTLYSSLLTFTLHVHPDRLDYVDQILGACVKKLSGKGKLKDSKATKQIVALLSAP…
NbD001463.1	uncharacterized protein At3g28850 (XP_019229031.1)	MGCASSKRIEATVDVYRPLPTSFAVFDINSIEEPWLKADNNKVEDEEEQEEKQLAIVPQPILAKFSANTDEDPRSWDEVSKALEDIKPTLQNPPPLKSPKKTLLALPAPPPPAAKDGGASPKRRLPRKSFSFHTLEELESNISSKGSKKPNELKKTESMPTYEEYKKLQKFGNKTVKNESQIVVHTGNVQQRIESEGYKPVKENIFLLRDKMEREKEGKVPTFIKFDPLSDYPEKCPPRGEDSLVVYTTSLGGVRRTFEDCNKVRLILESHRLVFDERDVALHGEFRQELKELLGEQEDASVPRLFVKGRYIGGVEEVVNLNETSRLGRILNRARVERGVGRVGCEGCGGARFVPCFDCGGSCKVVNGDVKERCPKCNENGLIHCPICD*
NbD001576.1	dnaJ homolog subfamily B member 4-like (XP_016457794.1)	MGVDYYKVLQVDRNAKEDDLKKAYRKLAMKWHPDKNPNNKKDAEAKFKQISEAYDVLSDPQKRAVYDQYGEEGLKGQVPPPGAGGYPGTSDGGAGHGSFRFNPRSADDIFSEFFGFSSPFGGGMGDMGGGRAGGSSFPRGMFGEDIFTSFRNAAGEGASSNVPRKAAPIERTLPCSLEDLYKGTTKKMKISREVTDATGRPSTTEEILTIDIKPGWKKGTKITFPEKGNEQRGIIPSDLVFIIDEKPHSVFKRDGNDLVVTQKISLVEALTGYTAQITTLDGRNLTIPINSIISPNYEEVIKGEGMPIPKEPSKKGNLRVKFNIKFPSKLTSEQKAGIKRYLT*
NbD001875.1	uncharacterized protein LOC107789946 (XP_016467312.1)	MAASEMLSKEQLLHLFDRFAFLTSQSDVKKRIADAVSDKQEAVAVTTAIQEEIFSEMGIDPRFGLACLGKINMTYESDRDLMIHFYEFVAKEEMACEEAELGPDGFAERLKMQQNLQEQQLEMLKYMRNFHMDDQSAILEKIHQQLEKANFDTEASVLTVEQMQDVVRRRVSPLFQPR*
NbD002583.1	golgin candidate 6 (XP_009763262.1)	MDLVAKYQGVVGRVFGNENSGSSEDSYVERLLDRISNGVLAEDRRAAMLDLQSVVTESRAGQMAFGAMGFPVILSVLKEERDDVEMVRGALETLVGALTPLDHAKGPMNEVQPALMNSDLLSREVDNISLLLSLLSEEDFYVRYYTLQLLTALLTNSPQRLQEAILSIPRGITRLMDMLMDREVIQNEALLLLTYLTREAEQIQKIVVFEGAFEKIFSIIKEEGGSEGGVVVQDCLELLNNLLRNSASNQVLLRETMGFDQLLSILNLRGTTYRFTQQKTINLLSVLETMNLLIMGGPETDPGRDANKLTNKTVLVQKKVLDHLFMLGVESQWAPVPVRCTALHSIGDLIANHPKNLEELASKRLGEEPDLEPALNSVLRILLRTSSKQEFMAADYLFK…
NbD002695.1	importin beta-like SAD2 (XP_009613928.1)	MDLQNLAVVLRGALSPNPDERKSAEDSLNQFQYTPQHLVRLLQIIVDGSCDMAVRQVASIHFKNFVAKNWSPHDPAEQSKILPSDKELVRQNVLIFTAQVPSLLRVQLGECLKTMIHADYPEQWPTLLPWVKHNLQDQQVYGALFVLRILSRKYEFKSDEERTPVYLIVEETFPQLLNIFNRLAQIANPSIEVADLIKLICKIFWSSIYLEIPKQLFDPNMFNAWMVLFLNMLERPVPLEGQPADPELRKSWGWWKVKKWTVHILNRLYTRFGDLKLQNPDNKAFAQMFQKGYAGKILECHLNLLNVIRAGGYLPDRVINLILQYLSNSISKSNMYSLLQPRLDIVLFEIIFPLMCFSDNDQKLWEEDPHEYVRKGYDIIEDLYSPRTAAMDFVSELVR…
NbD003577.1	acyl-CoA-binding domain-containing protein 4 (XP_019237186.1)	MAAMARVSSGLAYPERFYAAAAYAGFDGSPDSSTKGVSSKFSNDGALLLYALYQQATIGPCKIPKPRSWSPVEQSKWTSWNGLGNMASTEAMRLFVKILEEEDPGWYSRASNFVLEPAVQVEKNNDTIAEPVTENGIVLPETKTIPAENGNLSEPQDKDVSEGFGTVGVYDQWVAPPISGPRPKARYEHGAAVIDDKMYIFGGNHNGRYLSDLQALDLRSWTWSKVEVKTAGEASQVPVAPFAGHSLIPWEGNKLISVGGHTKDPSETMQVKVFDLPARTWSTLKTYGKPPLSRGGHSVTLAGTSLVIFGGQDANRSLLNDLHILDLETMTWDEMGTLGVPPSPRSDHAAAVHAERYLLIFGGGSHATCFNDLHVLDLQTMEWSRPTQQGEIPSPRAGH…
NbD005697.1	bifunctional epoxide hydrolase 2-like (XP_016491635.1)	MEKIQHNYVDVRGLKLHIAEIGTGPAVLFLHGFPEIWYSWRHQMIAVADAGFRAIAPDFRGYGLSELPAEPEKATFRDLVDDLLDMLDSLGIHQVFLVGKDFGARVAYHFALVHSDRVSAVVTLGVPFLLTGPETFPRDLLPNGFYMLRWQEAGRAEKDFGRFDTKTVVKNIYIMFSGSELPVAKDDEEIMDLVDPSAPLPDWFTEQDLANYASLYEKSSFRTALQVPYRAWLEEYGVKDIKVKVPCLLVMGEKDYSLKFGGLEQYVKSGMVKEYVPNLETIFLPEGSHFVQEQFPEQVNQLIITFLKKLI*
NbD010380.1	protein STRUBBELIG-RECEPTOR FAMILY 6 (XP_009614011.1)	MRLQLLPVVALPLLIGILFYGPSYAIADTDPNDASALRVMYGALNSPGQLTKWTANGGDPCGESWKGITCSGDNRVTEIKISGLQLSGSLGYQLASLTSVTNFDISNNNLGNQLPYQLPPNVQRLNLAGNGFNGGLPYSISQMTSLRYLNVSHNQIQGQVTVAFDSLSSVNTLDFSFNAMTDNLPQSFKALTSMNKMYLQNNQFTGTIDVLANLPLDDLNVENNRFTGWIPDQLKGFVKSNGNSWNSGPAPPPPPGTPPASRPDRHHGGGSGDGSGKSGIGGGAIAGIVISILVVVAIVAFFVIKKRSRRSSTDIEKHDNQPFAPLASQEVQEMKTNQASSAPSVKTFEAPAVVNLRPPPIERHKSFDEDEIAAKPIVPPKKVNTAKINARQYSIADLQ…
NbD011824.1	40S ribosomal protein S2-3-like (XP_019223368.1)	MAERGGFGRGFGGRGGRGGDRGGRGRGGRRPRRETEEEKWVPVTKLGRLVKDGKIRSLEQIYLHSLPIKEYQIIDTLIGPSLKDEVMKIMPVQKQTRAGQRTRFKAFVVVGDGNGHVGLGVKCSKEVATAIRGAIILAKLSVIPVRRGYWGNKIGKPHTVPCKVTGKCGSVTVRMVPAPRGAGIVAARVPKKVLQFAGIEDVFTSSRGSTKTLGNFVKATFDCLMKTYGFLTPDFWKETRFTKSPFQEYADLLSKPASKVIVYTTEEAAPETVQA*
NbD011846.1	LOW QUALITY PROTEIN: probable disease resistance protein At4g27220, partial (XP_019267123.1)	MAVVSFIPVISKLADYVVAPVGRQFLFIYYRKKNVEELQKKVKTLNETREDVLNLIIVATSSDREIKITVKSWLEEVDTVLAEAEELDNEAKTRLKCLNGCFPDFLSRYKLSKMVVKQTKKVNSLLDQRPKEEVSTSTPPLNLLLLSNEGKDIKDESEPMLDIVVQQSEPMLDIIVQQSEPMLNIIVQQREAVDKIMETLQDEDCKIVGIYGMGGIGKTTLAKEVGKMARACNLFDMVVYAVVSQSPDTRKIQGQIADILHLILTEESEMGRAGRLYSRLSEKKILVILDDVWSSIDLAAIGIPCGSKHKSCKIMITTRRVSVCRTMGAKEIPLRLLSFEESCHLFRTNAKLAISSVTSELEIMVMEIVQECQGLPLALVAVGRALHGKSVIEWTAALQ…
NbD012857.1	uncharacterized protein LOC107791192 isoform X1 (XP_016468693.1)	MAKEGPNWDGLLKWSLSHADGTNPSRNLSEEDRRWFMEAMQAQTVDVVKRIKEITLVMQTPEQVLESQGVTSQDIEDMLDELQEHVESIDMANGPHVNMSMLHVSSLVLERSVSKSHIGREQYFKRRGRKTRHFTYASYRRKPRNLADLHSIGGLVPLLGYLKNSHANIRAKAAEVVSTIVQNNPKSQQLVMEANGLEPLLSNFTSDPDVTARTKALGAISSLIRHNKPGIAAFRLANGYAALRDALSSDSVRFQRKALNLIHYLLHENRSDCAAVTELGFPRIFMHLASSEDGEVREGALRGLLDLGQDRAAQAADGLSSEDDEKLKQILQERIKGISAMSPEDLGAAKEERQLVDSLWNTCYNEPSSLREQGLVVLPGEDDALPPDVASKHFEPPLR…
NbD013589.1	novel plant SNARE 11 (XP_016440521.1)	MASLTGVSEELGEIEGQISDIFRALSNGFQKLEKIKDSNRQSRQLEELTGKMKECKRLIKEFDREVKDLEYKNDADTTKMLNEKKQSMIKELNSYVALKKQYASNIENKRVDLFEGPGEGFAEENGLLASNMSNQQLMDQGNRMMDETDQVIERSKKVVHETVNVGTETAAALKAQTEQMSRIVNELDSIHFSIKKATQLVKELGRQVATDRCIMGLLFLIVVGVIAIIIVKIVNPHNKDIRDIPGLAPPAPSRRLLAYPY*
NbD017089.1	60S ribosomal protein L8 (XP_016475073.1)	MGRVIRAQRKGAGSVFKSHTHHRKGPARFRTLDFGERNGYLKGVITEVIHDPGRGAPLARVTFRHPFRYKHQKELFVAAEGMYTGQFVYCGKKATLMVGNVLPLRSIPEGAVVCNVEHKVGDRGVFARSSGDYAIVISHNPDNGTTRVKLPSGAKKIVPSGCRAMIGQVAGGGRTEKPMLKAGNAYHKYRVKRNCWPKVRGVAMNPVEHPHGGGNHQHIGHASTVRRDAPPGQKVGLIAARRTGRLRGQAAATAAKADKA*
NbD018551.1	acyl-CoA-binding domain-containing protein 4 (XP_009795858.1)	MGSDGQNWYLDLTYDQWTPLSVSGPRPAARYKHAAAMVDGKLYIIGGSRNGRYLSDIQVFDLKSLSWSIIKLNSGVLPATSGHNMIKWENKLLLLAGHSKDVSDTVTVRFIDLQSYECGVIETFGKLPVARGGQSVTIFGSKLIMFGGEDRNRFLLNDVNVLDLETMTWSTVETTQTSPAPRFDHTAALHADRYLLILGGCSHSVFFNDIHVLDLETMEWSRPQLQGDLVSPRAGHAGVTLGDNWYIVGGGDNRSGVPETLVLNMSKLVVSVLATVKGRDPLASEGLSVSSALLDGEKFLVAFGGYNGKYNNEVYVMRPKPRDVLHPKMLQSPAAEAAAASVRAAYALTKPEKLDLSERENSNFKEVHVDNTQQKLSAEISAHGLQKKALESSLADVQA…
NbD022579.1	putative late blight resistance protein homolog R1A-10 (XP_016448374.1)	MADTAVDFVIDNLKQLLRDNTYLIAAIVDEVNPLLAELQNLHAFLKQATKSRSRNEILKHLVKELSIAVNEAEVSIDKFVIEAKLHHNKGIKKMFDFGHVMKARQCAIEIKSTKEKLKEIRRENAYHIQFDDHQSVKDQELIRKVPLPEEDDVVGFDEEATEIINRLCKGSDEIEIIPIVGMPGLGKTTLANKIFKDARVQYEFVSQIWVYVAQSYNRREVFLNIISKFTRNVKQFEYEAEEDLATAIREFLGKGGRYLIVLDDIWTLEALNELKIAFPNNHKGNKIMLTTRNSSLAYRCNNYPHKLKFLTESECWLLLKKKVFRKDKCPLEFEELGRGIAKKCMGLPLATVVIAGSLIGRCTERDWHQVHQSVGEHIIYRDYSIPKKLVQMSYDSLPF…
NbD024229.1	4-coumarate--CoA ligase 1 (XP_016482929.1)	PMESTTETKQSGDLIFRSKLPDIYIPKHLPLHSYCFENISEFSSRPCLINGANDQIYTYAEVELTCRKVAVGLNKLGIQQKDTIMILLPNSPEFVFAFMGASYLGAISTMANPLFTPAEVVKQAKASSAKIIITQSCFVGKVKDYASENDVKVICIDSAPEGCLRFSKLTQSDEHEIPEVKIQPDDVVALPYSSGTTGLPKGVMLTHKGLVTSVAQQVDGENANLYMHSEDVLMCVLPLFHIYSLNSILLCGLRVGAAILIMQKFDIAPFLELIQKYKVSIGPFVPPIVLAIAKSPIVDSYDLSSVRTVMSGAAPLGKELEDAVRTKFPKAKLGQGYGMTEAGPVLAMCLAFAKEPFDIKAGACGTVVRNAEMKIVDPDTGCSLPRNQPGEICIRGDQI…
NbD026973.1	60S ribosomal protein L6-like (XP_019259840.1)	MAAKKSPRNPELIRGVGKLSRSKMYHKKGLWAIKKKNGGSFPVHKKAAAVAPPAVKPPKIYPADDVAKPLVNKHKPKPTKLRASITPGTVLIILAGKFKGKRVVFLKQLKSGLLLVSGPFKLNGVPLRRVNQAYVIGTSTKVDISGVSVEKFDDKYFAKQAEKKQKKGEGEFFEDKKEEKKNVLPQEKKDDQKAVDEALIKAVECVPELKAYLSARFSLKSGMKPHELVF*
NbD028041.1	probable glutathione S-transferase (XP_016459398.1)	MANEEVILLDFWPSMFGMRLRIALAEKEIKYEYKEEDLRNKSPLLLQMNPIHKKIPVLIHNGKPICESIIAVEYIEEVWKDKAPNLLPSDPYDRAQARFWADYIDKKLYDVGRKLWATKGEEQEAAKKDFIECLKVLEGALGDKPYFGGESFGFVDIALIGYYSWFYAYETFGNFSTEAECPKFVAWAKRCMQRESVAKSLPDQPKVLEFVKVLRQKFGLE*
NbD029254.1	40S ribosomal protein S8-like (XP_019251802.1)	MGISRDSMHKRRATGGKKKAWRKKRKYELGRQPANTKLVPNAKTVRRIRVRGGNVKWRALRLDTGNFSWGSEAVTRKTRLLDVVYNASNNELVRTQTLVKSAIVQVDAAPFKQWYLQHYGVDIGRKKKSAVKKEGEEAETAPAAEEKKSNHVQRKLQKRQQDRKIDPHVEEQFASGRLLAAISSRPGQCGRADGYILEGKELEFYMKKLQKKKGKGASGAA*
NbD029515.1	CBL-interacting serine/threonine-protein kinase 23 (XP_019254636.1)	MGSRSNNGSGRTRVGRYEIGRTVGEGTFAKVKFARNVETGDNVAIKILDKEKVMKHKMIGQIKREISTMKLIRHPNVIRMYEVMASKTKIYIVLEFVTGGELFDKISSRGRLKEDEARKYFQQLINAVDYCHSRGVFHRDLKPENLLLDANGVLKVSDFGLSALPQQVREDGLLHTTCGTPNYVAPEVINNKGYDGAKADLWSCGVILFVLMAGYLPFEESNLMALYKKIHKAEFTCPPWFSSSAKKLIKRILDPNPQTRITFSEVIENEWFKKGYRPPVFEQADVSLDDVNAIFSESADSSNLVVERRDERPSAPLTMNAFELISTSQGLNLSSLFEKQMGLVKRETRFTSRCPANEIVSKIEEAAVPLGFNVRKSNYKIKLHGEKSGRKGHLSVATE…
NbD029921.1	plant intracellular Ras-group-related LRR protein 1-like (XP_016486295.1)	MDPNPSKFPILSYVMSKLPSIGPKRNAADEFDIEQPQPLPQPPKEPHFDITERMPHLTDPKVIAAMNSAVADVSQTRSMVKTLGERPDHELVDTAKMKLAEIEANLSKRLGEVVLSPRPPEMESADWRSNLAVKEDECRKAAEKEKEEYKALIALDELHEAYEKMLKDAERRLEKIYETAVAGGDVEGIEQAFGEKSSEFKEEVNEEVIAILQEASGKSVERVDLSGRQLRMLPEAFGKIRSLIVLNLSNNQLAVIPDSIASLENLQELHLSSNLLEMLPDSIGLLFSLKILDVSANKLITLPDSICHCRSLVELDASVNKLSYLPTNIGFELVNLKKLSLSLNKLRSLPTSIGEMKSLCLLDVHFNELHGLPRSFGNLTNLEILNLSNNFSDLTELPN…
NbD030449.1	calcium-dependent protein kinase 1-like (XP_019233505.1)	MGNTCVGPSISKNGIFQSVSAAMWRSRSPDDTASTTNGESARIETPISVKEPDSPLPVQEPPEQMTMPKSEKKEEEKEQPKKSKKPAEMKRVSSAGLRTESVLQKKTGNLKEFFSIGKKLGQGQFGTTFKCVEKATGKEYACKSIAKRKLLTDDDVEDVRREVQIMHHLAGHPHVISIKGAYEDALAVHVVMEFCAGGELFDRIIQRGHYTERKAAELTRTIVGVVEACHSLGVMHRDLKPENFLFVDQKEDSLLKTIDFGLSIFFKPGDRFTDVVGSPYYVAPEVLRKRYGPEADVWSAGVIIYILLSGVPPFWAENEQGIFEQVLHGDLDFTSDPWPSISESAKDLMRRMLVRDPRRRLTAHEVLCHPWVQVDGVAPDKPLDSAVLSRMKQFSAMNK…
NbD032444.1	pyrophosphate--fructose 6-phosphate 1-phosphotransferase subunit alpha-like (XP_016500780.1)	MDADYGIARELSDLQKHRSQYQPELPPCLQGTTVRVELGDATTASDPSGEHTISRSFPHTYGQPLAHFLRETAKVADAQIITEHPAKRVGVVFCGRQSPGGHNVIWGIHDALKIHNPNSTLLGFLGGSEGLFAQKTLEITNDVLSTYKNQGGYDMLGRTKDQIRTTEQVNASMAACKASKLDALIIIGGVTSNTDAAQLAETFAEAKCQTKVVGVPVTLNGDLKNQFVEANVGFDTICKVNSQLISNVCTDALSAEKYYYFIRLMGRKASHVALECTLQSHPNMVILGEEVAASKLTLFDITNKICDAVQARAEQDKNHGVILLPEGLIESIPEVYALLQEIHGLLRQGVSADKISSQLSPWASALFEFLPPFIKKQLLLYPESDDSAQLSQIETEKLI…
NbD035909.1	protein TSS (XP_019258637.1)	MAPRSGRGKGNKAKTDKKKKEEKVIPSILDISVVTPYETEVVLKGISTDKILDVRKLLAANVETCHFTNYSLSHEVKGPKLNDRIDIATLKPCLLRMDEEDYTEESQAVDHVRRLLDIVACSTRFAKAKAGKVTTPSAASSGTESRAKKHKVQRNASSRPASPSDGVAPSSPSASVAQEENEMVAIHPIPKLSDFYEFFSLSNLSPPILSLKRVDCNDAKTRRDGDYFELQIKICNGKTLQVVAAAKGFYTLGKPLMRSHCLVDLLQQLSQTFANAYESLMKAFTEHNKFGNLPYGFRANTWLVPPSVVDSASNFIPLPVEDENWGGNGGGQGRNGEHDHRSWATDFAVLANLPCKTEEERVVRDRKAFLLHNLFLDVSIFKAVSAIYKVMDSISRGTS…
NbD038514.1	epidermal growth factor receptor substrate 15-like 1 (XP_009762703.1)	MASPNMDQFESYFRRADLDQDGRISGPEAVAFFKGSNLPQPVLAQIWTYADQSRTGFLGRQEFYNALKLVTVAQKRELTPEIVKAALFTPASAKIPAPQINLAAVPVLQPTNKVGAAVPPVNGATPTAAQTFGIRGQQGLPAQQSHYMRPPRPSNPNPGFQSQPNISGQGMLVGSTVVASRPPSSTDLPAGRNGGSQAGPGSQAPNTSVSSRNQDAFGLVALTPFAQQTQQATTSSLQPDLSKSSDATLSPGNLPDAKVPKAVPVAGNGFPSDSLFGDVFSVASVQPKQSSTPTISSAVSSATVPAPIGPQPPIKASSVDSQTTLPQQLVHQHQQAHLIVRPNQQVQVQSSAAIPSAARNSLPGQSQLPWPRITQSDYQKYSKVFMAVDTDRDGKITGT…
NbD038769.1	uncharacterized protein LOC107782443 (XP_016458815.1)	MKPVCPFVGASRPDDTSIKKPGEHQNKQLASQESKPKQDSGESAIVSPKCPFGYGQENKAKQESGESATVSPKCPFGYDSQAFKLGPFSCMICQALLYDCSRCVPCSHVFCKACLLRFKDCPLCGADIEKIESDLNLQNVVDRFIEGHARIKRCQVNDDEKEAEERKTVMYEDVSLERGAFLVQQAMRAFRANNIDSAKSRLTMCADDIRGQLERLGNTSELCSQLGVVLGMLGDCCRATGDAASAVTYFEESVNFLVKVPKDDLEITHTLSVSLNKIGDLKYYDDDLEAARSHYIKALDVRRNAIKQQSAPSQIIDIATSLAKVADVDRNLGNEDAAIDGFEEAIKMLESLELNPEEASLEQRRLSVLQFLNSQMEKKQPA*
NbD039501.1	plant UBX domain-containing protein 8-like isoform X1 (XP_019238295.1)	MARPNQEAIDTFMSITGVSETTAIQKLEEHGGDLNEAVNAHFNQGDSNRVHAAPLAAAPDEDAMEIDDPITEEFRRPPFSVLSSSRSPNPFSLLDPNFTRSVFDTDLTSRAPFVSHPRQVREIPIEVKDGDGQSGHSRNAPIIEDVTDTEQTHGPETRGAVIIDDDDDEVVPSPLSTHAARHRNRTNAVIFDDDSTAAFSRPSAPGDNVLPDYTNDIEEEMVRAAIEASKRDAEMSNQQLDVNNDLSDPTPQPRQSHLEDAQLAHAVSLSLKTAEQEKAIHELGSKAISEPEGYKPAEEDERGKSITSNGRQFRSEVGSSSVPDEAEDLEEEPLVWRRRKPISSGSETAQDIEEHVGSPLSSPRQHDNLNRSPRNGADFPSDEWGGISSLEHDEAVMLE…
NbD040723.1	cellulose synthase A catalytic subunit 1 [UDP-forming]-like (XP_016460309.1)	MEASAGMVAGSHKRNELVRIRHDSDSGPKALKPLDNQICQICGDTVGLTASGDLFVACNECAFPVCRACYEYERKDGNQACPQCKTRYKRHMGSPRVDGDDDEEDVDDIDNEFNYAQGNSKARQQWQGEDAGLSSSSRHESQQPIPLLTNGQQVSGEIPRSMTDTQSVRSMSGPLGPGDKHASLSYVDPRQPVPVRIVDPSKDLNSYGLGSVDWKERVEGWKLKQEKNMVQTSSRYTEGKGGDIEGTGSNGEELQMADDARQPLSRVVPIPSSHLTPYRVVIILRLVILGFFLQYRLTHPVNDAYPLWLVSVICEVWFALSWLLDQFPKWSPINRETFLDRLAVRYDREGEPSQLAPVDIFVSTVDPMKEPPLITANTVLSILAVDYAVDKVSCYVSDD…
NbD041660.1	CDPK-related kinase 4-like isoform X1 (XP_019237156.1)	MGHCCSKGVTADNDGHVVVDGNSAISTNNRPKPSPSPARPQSVGNGTSYTNNNTPAHSFTTSPFQSPYPAGIPPSPSPVGTPRRKFKWPFPPPSPAKPILSAILKRQGTTSAKPKEGPIPEDEGGEGERQLDKSFGYPKNLTAKYELGKEVGRGHFGHTCWAKGKKGELKNQPVAVKIISKAKMTTAISIEDVRREVKILKALSGHQNLVKFYDAFEDANNVYIVMELCEGGELLDRILSRGGRYTEEDAKSILVQILNVVAFCHLQGVVHRDLKPENFLFTKKEEDAPMKVIDFGLSDFIRPDQRLNDIVGSAYYVAPEVLHRSYSIEADMWSIGVITYILLCGSRPFWARTESGIFRSVLRADPNFEDSPWPSVSAEARDFVKRLLNKDHRKRMTAS…
NbD045703.1	60S ribosomal protein L4-1-like (XP_019260574.1)	MATAAAIPTTTVQSFENDMVTEGGAIPLPAVMKAPIRPDVVTYVHANISKNSRQPYAVSKKAGHQTSAESWGTGRAVSRIPRVSGGGTHRAGQAAFGNMCRGGRMFAPTKIWRRWHRKIPVNQKRYAVASAIAASAVPSLVLARGHRIESVPELPLVVSDSVESIEKTSNAIKALKQIGAYPDAEKAKDSHAIRPGKGKMRNRRYISRKGPLIVYGTEGAKLVKAFRNIPGVEICHVERLNLLKLAPGGHLGRFVVWTKSAYEKLDEIYGSFDKPSEKKKGYVLPRAKMANADIARIINSDEVQSVVRPIKKDVKRATLKKNPLKNLNVLLKLNPYAKTARRMSLLAEAQRVKAKKEKLDKKRHQVTKEEASAIRSASAAWYKTMISDSDYTEFDVFTK…
NbD046455.1	exocyst complex component SEC15B (XP_019253428.1)	MNTSKMRRKVVPAAVDNGDSADKLDQLLLSASICNGEDVGPFVRKAFASGKPEILLHHLRHFARSKESEIEDVCRAHYEDFITAVDDLRSLLSDVDSLKSSLSNSNSQLQSVAVPLLTTLDSFVEARNKCANITLAIQSLRTCVQLVELCSRANRHLSENNFYMALKCVDSIEREFMNKTPSSTLKRMLEKQIPAIRSHIERKINKEFGDWLVEIRVVSRNLGQLAIGQASASRQREEELRMKQRQAEEQSRLSLRDCVYALEEEDDDGFNGISDEAKGGNGILGFDLTLLYRAYHINQTLGLEDRFKQYYFENRKLQLTSDFQVSSMTPFLESHQTFFAQIAGFFIVEDRVLRTGGGLVSKLEVENLWDTAMSKMCSVLEDQFSRMQTANHLLLIKDY…
NbD046535.1	heat shock protein 90-1 (ALD51960.1)	MADTETFAFQAEINQLLSLIINTFYSNKEIFLRELISNSSDALDKIRFESLTDKSKLDAQPELFIHIIPDKTNNTLTIIDSGIGMTKADLVNNLGTIARSGTKEFMEALAAGADVSMIGQFGVGFYSAYLVAEKVIVTTKHNDDEQYVWESQAGGSFTVTRDTSGENLGRGTKMTLYLKEDQLEYLEERRLKDLIKKHSEFISYPISLWVEKTIEKEISDDEDEEEKKDEEGKVEEVDEEKEKEEKKKKKIKEVSNEWSLVNKQKPIWMRKPEEITKEEYAAFYKSLTNDWEEHLAVKHFSVEGQLEFKAVLFVPKRAPFDLFDTKKKPNNIKLYVRRVFIMDNCEELIPEYLSFVKGIVDSEDLPLNISREMLQQNKILKVIRKNLVKKCIELFFEIA…
NbD047153.1	alcohol dehydrogenase-like 7 (XP_016492702.1)	MATTQAELNKAAGKPIRCKAAVARKAGEPLVIEEVIVAPPKAHEVRLKIICTSLCHSDFTFWKLKEPACFPRIFGHEAFGVVESIGEDVEDLKEGDSVVPIFLPDCTECIDCTSKKSNVCSKFQFKGSPYMPRDGTSRFTTADGEALYHFLFVSSFSEYTVVDIANVTKIDPCVPPNRACLFSCGVSTGLGAAFKTANVEPGSTVVIFGLGAIGLAVAEGARICGATRIIGVDINSDKLEIGKQFGVTDFVNSNSFGDKPISQVINEMTNGGADYCFECVGLGTVVQEAYACCRKGWGKTIVLGVDKPGADLTFRSFDVLHSGKTLMGSLFGGLKPKSDIPLLVKRYLDEELQLDKFVTHEVSFQDINKAFDLLAQGKTLRCVIWMDK*
NbD047299.1	ABC transporter B family member 25-like (XP_009596277.1)	MNYHSGMHGHGLGGARTPLLDRTALGRKRNGAENGQLQDLEHGDSVPAPNIGFGRVLSLAKPEAGNLVIATIALLIASTSSILIPKFGGQIIDIVSGDIQTPEQKSEALNAVKNTILEIFLIVIVGSVCTALRAWLFSSASERVVARLRKNLLSHLVHQEIAFFDVTRTGELLSRLSEDTQIIKNAATTNLSEALRNLATAFIGLGFMFQTSWKLTLLSLAVVPVISVAVRRFGRYMRELSHKTQAAAAVASSIAEETFGAIRTVRSFAQEDYEISRYSEKVDETLKLGLGQAKVVGLFSGSLNAASTLSVIIVVIYGATLTIQGAMTPGALTSFILYSLTVGSSVSGLSGLYTVAMKAAGASRRVFQLLDRTSSMPESGNQCPLGDQAAELELDDVWF…
NbD049531.1	leucine--tRNA ligase, cytoplasmic-like (XP_019228115.1)	MAEEGGRSFARRNQLLEIEKQVHKWWTEGDVFRAEPKELPPKAGEKFYGNFPFPYMNGYLHLGHAFSVSKLEFAAAYHRLRGASVLLPFAFHCTGMPIKASADKLSREISRFGNPPVFPVVKEEESVETEVKVETEGNQALPGGKFKGKKSKAVAKTGGDKYQWEIMRSYGLSDEEIARFTDPYYWLTYFPPLAVEDLKEFGLGCDWRRTFITTDVNPYFDSFVRWQMRKLKALGWIVKDLRYTVYSPLDGQPCADHDRASGEGVIPQEYTLIKMEVLPPFPPKMSVLEGKKVYLAAATLRPETMYGQTNAWVLPEGKYGAFEINDTEVFVLTYKAALNLAYQRLSLVPEKPSCLVELSGQDLIGLPLRSPLAFNEIIYTLPMLSVLTEKGTGIVTSVP…
NbD049638.1	FAM10 family protein At4g22670-like (XP_009782852.1)	MEPAKLNELKQFVEQCKSNPSILSNPSLSFFRDYIESLGGKLPPFAYDTGDYKAKSHVVDESDDEVGDDENDAHAKGAAEEDEEPEIIESDIELDESDTVEPDNDEPQKMGDPSVEVTEEARDASQESKAQAMEAISEGKLEDAIEHLTKAVLLNPTSAIMYAARASVYIKMKKPNAAIQDANAALEINPDSAKGYKSRGIARAMLGKWEEAAKDLHLASKLDYDEEISAVLKKVEPNAHRIEEHRRKYDRLRKEREDRKNERERQRRKAEAQAAYEKAKKQEESSSSRRAGGMPGGFPSGMPGGFPGGMPGGFPGMPGGFPGGMPGGSPGGMPGSPGGMPGGFPGAMPGGMPGNMDYSKILNDPELMAAFKDSDVMAALQDVMKNPANLAKHQANPKV…
NbD049767.1	peptidyl-prolyl cis-trans isomerase Pin1 (XP_019232608.1)	MASNQVRASHILIKHEGSRRKASWKDPEGRVISNTTRNAAVTQLKAFRDDIISGKSKFEDVASRFSDCSSAKRGGDLGPFCRGQMQKPFEDTTFALKVGEISDIIDTDSGVHIILRTG*
NbD051328.1	novel plant SNARE 13-like (XP_016477842.1)	MANLDLQMNPQMEQIHGEIRDNFRALANGFQKLDKIKDSNRQSKQLEELTGKMRECKRLIKEFDREIKDEESRNPPEISKQLNDEKQSMIKELNSYVALRKTYMSSLGNKRVELFDMGGASEPTAEENVQMASAMSNQELISAGNKTMDETDQAIERSKQVVHQTIEVGTQTATTLKGQTDQMGRVVNELDTIQFSIKKASQLVKEIGRQVATDKCIMLFLFLIVCGVVAIIVVKIVNPHNKDIRDIPGLAPPAPSRRLLYLKSGQDFM*
NbD051522.1	transcription factor VIP1-like (XP_009796303.1)	MDPKFAGKPIQAQFLSGQTDLDQMQDTPTRGSRHRRAQSETFFRFPNFDDDILLDDAVTDFNLQQQQPANSADSSSTGPALSAGPSDNNPKPLAHYRSLSVDADFFDGLDFSAAAAENKMMGGGPRHRHSNSMDGSFDFESESLSVKKAMAPDKLAELSLIDPKRAKRILANRQSAARSKERKTRYTGELERKVQTLQTEATTLSAQITVLQRDTSGIAAENKELKFRLQALEQQAHLRDALNETLREEVQRLKIEAGQIPAANGNRGTRFHLPPQPQPFVQCGNHHPQHQQQHIPRSTASNQTVPGQSQSSLFNFNSRA*
NbD051686.1	40S ribosomal protein S28 (XP_019254391.1)	MESATKHAIVVKVMGRTGSRGQVTQVRVKFLDDQNRFIMRNVKGPVREGDVLTLLESEREARRLR*
NbE03055723.1	proline-rich receptor-like protein kinase PERK1 isoform X1 (XP_016482969.1)	MSSPTPGASPAPTSPPAPPTNSTSTPPTAAASPPALPAQAPPPTSPTPPATTPPPTASASSPPPSTSAPSSSTPAPPTTQSTPAPVGPRGGGGSSSSSPASDEGSSGVSTGLVVGIAIGGVLILAVLSLLFICCSRRKKRRNHGPVEYYPPAQPPPMGYKADPYSDPVHHWQHNTPPPADHVVSIPPKPSPPPAGASRPPHSPVTASLPQPPPPPPYMGSSGASSNYSGFDPLPPPSPGTVLGFSQSTFTYEELVRATDGFSNANLLGQGGFGYVHRGVLPNGKEVAVKQLKAGSGQGEREFQAEVEIISRVHHKHLVSLVGYCITGSQRLLVYEFVPNNTLEFHLHGKGRPPLDWPIRLKIALGSAKGLAYLHEDCQPKIIHRDIKAANILIDFNFEA…
NbE03057920.1	WEB family protein At5g55860-like (XP_016476003.1)	MVAKDHKKITGSPIQVGEIDTSAPFQSVKDAVNLFGEGAFSGEKPAIKKAKPQSAERVLAKETQLHLAQKELNKLKEQLKNAETTKDQALTELERAKRTVEDLTHKLKLVCESKDSAIKATEAAKSRVNHLEEANNGSVIVNDGSWKVDLETAREEYMAEIAYLNTAKQELRKICQDCNTSMEEKAVAIEQAAEAERTAKANAERASELSKEIAAVQESIDQLKLACVLEREEEAKIYAEKDVQKQSYKAKLEESAEKLLALRKETNGDIARSLEAQLAETTSQIEALQKEMDSTKSSDLDTVRAVTAELDDAKESLLKVAEEESTLHTVLEALKLELESVKKEHSELKEKEAETESLAVGLHIKLRKVKSELEVAVAEESRARGASEEMISTLHQLTL…
NbE03059398.1	protein GRIP (XP_019232895.1)	MVKQFNPSYAKAEMMEGNINSGAADNHSENANKTEKQFNNFNIESNHVKENGIYDGYQHTCDNHDDLVQMLVELNFQNDYLKSQIVGWQNINLYSDESGQQVRAAGHENGASDNSVDLNEKIESLERELLEEKQTRGAAEEALKHVQTLYLEADTKVQELSAKVDEVQHTMDQEIKERDERYSELDSKFNRLHKRAKQRIQEVQKEKDDLEAQFRDVNEKSERAASQRSALQQELERSRQHAQEALKAMDMERQQLRSTNNKLRDNIEELRRSLAPKEIALEASQQALLEKEQKLEEMGALLQAADEKRQASLDDLSSKHQKQRESLEAQITEALAERSKATETISSLRALIAEKESKIAEMDAASSGEAARLRAAVETLKGDIIHLKSEHEKEKDSWE…
NbE03061162.1	acyl-CoA-binding domain-containing protein 4 (XP_009795858.1)	MGSDGQNWYLDLTYDQWTPLSVSGPIPAARYKHAAATVDGKLYIIGGNRNGRYLSDIQVFDLKSLSWSIIKLNSGVLPATSGHNMIKWENKLLFLAGHSKDVSDTVTVRFIDLQSYECGVMETFGKLPVARGGQSVTIFGSKLIMFGGEDRNRFLLNDVNVLDLETMTWSTVETTQTSPAPRFDHTAALHSDRYLLILGGCTHSVFFNDIHGLDLETMEWSRPQLQGDLVSPRAGHAGVTLGDNWYIVGGGDNRSGVPETLVLNMSKLVVSVLATVKGRDPLASEGLSVSSALLDGEKFLVAFGGYNGKYNNEVYVMRPKPRDVLQPKILQSPAAEAAAASVRTAYALTKPENLDLSEREDSNFKEVHVDNTQQKLSAEISALGLQKKALESSLADVQA…
NbE03061602.1	actin-depolymerizing factor 2-like (XP_016503290.1)	MANSASGMAVHDDCKLKFLELKTKRAYRFIVFKIEEKQKQVIVEKLGEPAEGYEDFCTHLPADECRYAVYDFDFLTKESVPKSRIFFIAWSPDTSKVRSKMIYASSKDRFKRELDGIQIELQATDPTEMGLDVFKSRAN*
NbE05062828.1	brefeldin A-inhibited guanine nucleotide-exchange protein 5 (XP_019230739.1)	MLKECSNKKFSALQTAIQSYIDNSKAFNKQSLPTEDDAASSAVDQSSATDTEAPKNESVSVNSTTASPSGEGAEQVSRPASESGTIVTALAQAGNTLIEAQAELVLNPLRLAFETKNGKIMELALDCLHKLIAYDHLEGDLGLDGGKNVTLFTDILNRVCGCVDNLSPDSTTLQVLKVLLTAVASTKFRVHGESLLGVIRVCYNIALNSKSPINQATSKAMLTQMLSIVVRRMENDLVSSSSGSVARLETTDTNGSNVKVEEVSCNDPEKEEITQGEDAAIIIQAKDTSVASVEELQKFVGGADIKGLEAALEKAVHLEDGEKVTRGIELESMSPGQHDALLLFRTLCKMGIKEDNDEVTVKTRILSLELLQGLLEGVSDSFTKNFQFMDSVKAYLSYV…
NbE05063196.1	protein WEAK CHLOROPLAST MOVEMENT UNDER BLUE LIGHT 1-like (XP_019245105.1)	MQDAKDMKESAPPDPSLEPKVSSPNEDQSHNAAQTSQHTSEKENSKVQEAAVDASEHLIDASRSLLLQESQTSPEGNLMSAASIKSNGVSDISETGTPEMASGTPMVQPEASTQSIQDLKVDPSANRNTTALGESNVSSTLDVKPSEMLEPAADMVANRKVHNQPNKESWERVQSDHSEVEPNNASPCHQPDNSPSSTHINEDESSPLSTQVRTLDNKNHIPLPDSIGHPLAKASTFTARTSVPIASPKHPEKSDINKGHIDTTAPIESVKQAVSKFGGIVDWKAHRVQTVERRQLVEQELAKVQEEIPFYKKQSQAAEDAKVLVLKELDSTKRLIEELKLNLERAQKEEQQAKQDSELAKLLVEEMEQGIGNEVSIAAKAQLEVARSRHAAAVSELKT…
NbE05063856.1	brefeldin A-inhibited guanine nucleotide-exchange protein 5 (XP_019230739.1)	DNSKAFNQQSLPTEGDAASSAVNQSSATDTEAPKNESVSVNSITASPTGEGTEQVSRPARESGTIVTALAQAGNTLSEAQAELVLNPLRLAFETKNGKIMELALDCLHKLIAYDHLEGDLGLDGGKNVTLFTDILNRVCGCVDNLSPDSTTLQVLKVLLTAVASTKFRVHGESLLGVIRVCYNIALNSKSPINQATSKAMLTQMLSIVFRRMENDLVSSSSGSVARQETTDTNGSNVKVEEVSCNDPENEEITEGEDATNIIQAKDTSVASVEELQSFVGGADIKGLEAALEKAVQLEDGEKVTRGIELESMSPGQHDALLLFRTLCKMGIKEDNDEVTVKTRILSLELLQGLLEGISDSVTKNFQFMDSIKAYLSYVLLRASVSQSPTIFQYATGIFS…
NbE05064444.1	clustered mitochondria protein isoform X1 (XP_009791408.1)	MAPKTGKAKPHKAKGEKKKKEEKVLPNIIEITVGTSEDSQVLLKGISTDKILDVRKLLAVNVETCHVTNYSLSHEGQVRGTRLKDTVEIVSLKPCHLSLVEEDYTEEQSVAHIRRLLDIVACTTSFGGSSSSPKPTGRTSSIEPGPENVESKSSKPKSQEPKKAASSPKAKPSKPDATAVCGGADAGDSAEKGDPAMMCPPPRLGQFYDFFSFAHLTPPIQYIRRSIRPFLEDKTEDDFFQIDVRICSGKPTTIVASRTGFYPAGKRALLSHSLVGLLQQLSRVFDAAYKALMKAFTDHNKFGNLPYGFRANTWVVPPFVADNPATFPPLPMEDENWGGNGGGQGRDGKHDHRPWAKEFAILAAMPCKTAEERQIRDRKAFLLHSLFVDVSVLKAVAAI…
NbE05065401.1	uncharacterized membrane protein At1g16860-like isoform X2 (XP_016442757.1)	MGSRFPSHQLSNGLYVSGRPEQPKERTPTMTSAPMPYTGGDIKKSGELGKMFDIPVDGSKSRKSGPVTGATSRTGLYTGAASHSGPINPNAAARTSYSTSGPISSSGVPGSVSTKKSNSGPLSKHGEPIKKSSGPQSGGGTPTGRQNSGPQAPVLPATGLITSGPISSGPLNSSGAPRKASGPLDSMGSAKFHGHSVVNSQAVTTLSENDVYSFKRSLPKPILWAMILLFVMGFIAGGFILGAVHNAILLIVVVVLFGIVAALFIWNSCWGGSAIISFISRYPDAELRTAKNGQYVKVFGRYVVDFYISDFQSGLRALVKSGCGAKVTPYVDESIVVDVDPSNNELSPEFIRWLRERNLSSDDRKMQLKEGYIKEGSTVSVIGVVQRNENVLMIIPPPE…
NbE05065529.1	protein transport protein SEC24-like (XP_016442297.1)	MAVRATVSRFPGDQDALEESGLPWGVTVSPFASKDENGNPPVYGSDGHLLPRCENCWAYYNTYCEQEQWAWTCALCGTLNGLSSQAVTRYSLPESCPENLSSFIDLELPMDESEEMQARPVYVAAVDLASSEEVLELVKSALLAALEALGPGSLFGLATFSHKIGLYDVQGPIPVVKNVFIPHDSDSALSMELQDVMPLLSFLAPVDTCKDRIASALETLRPTTSWERTSGAGQGLDGVFLGGRGFGAAMEALFNYLGSEYGNTFALARVFAFLSGAPDIGAGQLDTRRYGEQYASKGEDADRALLPEQTPFYKDLAAVAVQSGVCVDIFAVTNEYTDLASLKFLSIESGGSLFLYTSSDDSTLPQDMYRMLSRPYAFNCVLRLRTSPEFQPSHSYGHF…
NbE05065846.1	60S ribosomal protein L19-1 (XP_019247440.1)	MVSLKLQKRLAASVLKCGRGKVWLDPNEGNEISMANSRQNIRKLVKDGFIIRKPTKIHSRSRARRMKEAKRKGRHSGYGKRKGTREARLPTKVLWMRRMRVLRRLLRKYRESKKIDRHMYHDMYMKVKGNVFKNKRVLMENIHKTKAEKAREKTLSDQFEARRAKNKASRERKFARREERLAQGPGERPVQPAAPAASATPAQTAQGGSKKSKK*
NbE05065906.1	acyl-CoA-binding domain-containing protein 4 (XP_019237186.1)	MAAMARVSSGLAYPERFYAAAAYAGFDGSPDSSTKGVSSKFSNDGALLLYALYQQATVGPCKIPKPRSWSPVEQSKWTSWNGLGNMAFTEAMRLFVKILEEEDPGWYSRASNFVSEPAVQVEKINDTIAEPVTENGIVFPETQTIPAESGNLSEPQDKDVVSEGFGTVGVYDQWVAPPISGPRPKARYEHGAAVIDDKMYIFGGNHNGRYLSDLQALDLRSWTWSKVEVKTAGEASQVQVAPFAGHSLIPWEGNKLISVGGHTKDPSETMQVKVFDLPAGTSSTLKTYGKPPLSRGGHSVTLAGTSLVIFGGQDANRSLLNDLHILDLETMTWDEMGTLGVPPSPRSDHAAAVHAERYLLIFGGGSHATCFNDLHVLDLQTMEWSRPTQQGEIPSPRAG…
NbE05066076.1	golgin candidate 3-like isoform X1 (XP_016442310.1)	MWSSIENFKENLNRIALEIHDDEDDDEEELSVYSSGDPPENNSKSDRIISRSFGRSKSPTYHSPIANGFGSAHNPEIEKYKIEIKRLKESEAEIKALSVNYAALLKEKEDQISRLNEENGLLKQSLQSSSPLSASRNMHKELADLLEEKNKSLSAMQASHELQLKQLEMELNKERTELANMQTRLQEEQKLSSTFQQELNSLKVDKDKMAVEMTRIRTELSHKVSELKQLQMELHERDDDESNEAIDGLRRVIETLQKENSNLKTEKDKLEASAAGASSADRSNINGITEKVHPLEVFPEKEEMKRSLQNLENELKEACWERDKALQELKRLKQHLLEKEMEESEKMDEDSQIIEELRQNNEYQRAQILQLEKALTQAIASQEDVKTLNDTELKKSKDT…
NbE05068445.1	girdin (XP_019228476.1)	MDSRHASLGRRTLEEIRQKRAAERLSKTSSGPDLTNIPNEVVGIKRSESTTRLSENDMSGLVSQLKQVQKNNAELDEANRALSSKLQTKEAENNMLQKRLNDLEQNTVPSLRKALKDVAMEKDAAVVAREDLSAQLRAIKKRVKEVEEEQYRAEEDAAALKAELNSLQQQAMSGPVSGVNSMNFPPDHMHVMEKELANLKSQLEQMTLLRQQERLQLVEEQARISTLNSQKQDLEEKLVVMSNKVSDEVTAKASQKTFSGEDKVRLEKQLHDMAVAVERLESSRQKLLMEIDSQSSEIERLFEENYNLSSAHQQALGVAVQWENQVKEQSKAEALSAEILQLNARLQQATQAYDSLTRIYTPVLRNIENSLVTLKQDGSVRVQ*
NbE44070891.1	uncharacterized protein LOC104110632 (XP_009618454.1)	MERNGDAKPHDMEPPTPHSIMKTSSRDRSSMEDPDGTLASVAQCIEQLRQNSSSMQEKEHSLKQLLELIDTRENAFSAVGSHSQAVPVLVSLLRSGSLGVKMQAGTVLGSLCKENELRVKVLLGGCIPPLLGLLKSSSAESQIAAAKTIYAVSQGGAKDHVGSKIFSTEGVVPVLWEQLKKGLKAGNIVDDLLTGALKNLSTSTEGFWSATVQAGGVDILVKLLNNGQPSTQANVCFLLACMMMEDSSVCARVLAAEATKQLLKLLGSGNEAPVRAEAAGALKSLSAQSKESRKEIANSNGIPALINATIAPSKEFMQGEYAQALQENAMCALANISGGLSYVISSLGQSLESCTSPAQVADTLGALASALMIYDSKAENSRASDPLEVEETLVKQFKA…
NbE44072724.1	heat shock factor protein HSF8-like (XP_009765164.1)	MESNSSAAADGGGGEPSSQSAPAPAPMPSPNAPPPFLVKTYDMVDDPSTDKIVSWGPANNSFVVWDPPEFARDLLPKYFKHNNFSSFVRQLNTYGFRKVDPDRWEFANEGFLRGQKHLLRSISRRKPAHGHAQQQQQPHGQNASVGACVEVGKFGLEEEVERLKRDKNVLMQELVKLRQQQQTTDNQLQGTVQRLQGMEQRQQQMMSFLAKAVNSPGFLAQFVQQQNESNRRIAEGSKKRRIKQDFEPQDHSVTPADGQIVKYQPMMNESAKATLRELSKLDSSPRLENFNSSPQSFLIGDGSPHSNASSTCVSGVTLQEVPPTSGQPLLSTASAIAGQSSSSEITNNQFSDISSFVGAQDLPPVSLSATDMIMPELSQLQEILPGNNMDIIGSEIEND…

## Sheet: Blast best hits in Arabidopsis
Proteins were blast against Arabidopsis
Protein	Species	E-value	% identity	Align len	Strands	Query ID	Query from	Query to	Target from	Target to	Bitscore	# identical	Positives	Gaps	Query len	Target len	TAIR gene Description
AT2G17790	A.thaliana TAIR10	0	76	789	+/+	NbD000685.1	1	788	1	786	1211.05	596	705	4	790	788	Encodes a protein with similarity to yeast VPS35 which encodes a component of the retromer involved in retrograde endosomal transport. Mutants partially suppress the loss of VTI11 function in Arabidopsis and restores gravitropism in the double mutant. The mRNA is cell-to-cell mobile. protein_coding VPS35 HOMOLOG A (VPS35A) ZIG SUPPRESSOR 3 (ZIP3);VPS35 HOMOLOG A (VPS35A)
AT5G03870	A.thaliana TAIR10	5.08e-41	51	164	+/+	NbD001463.1	229	390	224	385	149.058	83	110	4	390	385	Glutaredoxin family protein;(source:Araport11) protein_coding
AT3G08910	A.thaliana TAIR10	2.48e-170	74	345	+/+	NbD001576.1	1	343	1	321	476.863	257	286	26	344	324	DNAJ heat shock family protein;(source:Araport11) protein_coding
AT3G27050	A.thaliana TAIR10	1.08e-79	69	179	+/+	NbD001875.1	1	179	5	183	234.958	124	153	0	179	183	plant/protein;(source:Araport11) protein_coding
AT3G27530	A.thaliana TAIR10	0	68	899	+/+	NbD002583.1	1	884	1	898	1092.03	608	738	16	904	915	This gene is predicted to encode a protein that functions as a Golgi apparatus structural component known as a golgin in mammals and yeast. A fluorescently-tagged version of GC6 co-localizes with Golgi markers, and this localization appears to be replicated using the C-terminal (225 aa) portion of the protein. protein_coding GOLGIN CANDIDATE 6 (GC6) GOLGIN CANDIDATE 6 (GC6
AT3G59020	A.thaliana TAIR10	0	76	884	+/+	NbD002695.1	1	883	1	883	1442.56	676	770	2	1036	1030	ARM repeat superfamily protein;(source:Araport11) protein_coding
AT3G05420	A.thaliana TAIR10	0	72	670	+/+	NbD003577.1	3	667	2	664	854.358	484	555	12	672	670	Acyl-CoA binding protein with high affinity for oleoyl-CoA. Expressed in all plant organs. Involved in fatty acid transport. Plays a role in determining seed oil content. protein_coding ACYL-COA BINDING PROTEIN 4 (ACBP4) ACYL-COA BINDING PROTEIN 4 (ACBP4); (ATACBP4)
AT5G41850	A.thaliana TAIR10	0.0379	44	48	+/+	NbD005697.1	93	139	93	138	35.039	21	28	3	312	225	alpha/beta-Hydrolases superfamily protein;(source:Araport11) protein_coding
AT1G53730	A.thaliana TAIR10	0	71	409	+/+	NbD010380.1	301	705	312	718	571.622	291	337	6	708	720	STRUBBELIG-receptor family 6;(source:Araport11) protein_coding STRUBBELIG-RECEPTOR FAMILY 6 (SRF6) STRUBBELIG-RECEPTOR FAMILY 6 (SRF6)
AT3G57490	A.thaliana TAIR10	1.67e-150	90	221	+/+	NbD011824.1	36	256	41	261	421.779	199	212	0	276	277	Ribosomal protein S5 family protein;(source:Araport11) protein_coding RIBOSOMAL PROTEIN US5W (US5W) RIBOSOMAL PROTEIN US5W (US5W)
AT1G27180	A.thaliana TAIR10	0.000252	45	60	+/+	NbD011846.1	645	704	1122	1180	45.4394	27	36	1	1214	1557	disease resistance protein (TIR-NBS-LRR class);(source:Araport11) protein_coding
AT3G09350	A.thaliana TAIR10	0	66	412	+/+	NbD012857.1	1	410	1	353	520.005	272	307	61	434	364	Encodes one of the Arabidopsis orthologs of the human Hsp70-binding protein 1 (HspBP-1) and yeast Fes1p: Fes1A (AT3G09350), Fes1B (AT3G53800), Fes1C (AT5G02150). Fes1A is cytosolic and associates with cytosolic Hsp70. Mutants showed increased heat-sensitive phenotype suggestion the involvement of Fes1A in acquired thermotolerance. Does not have nucleotide exchange factor activity in vit
AT2G35190	A.thaliana TAIR10	8.86e-137	76	266	+/+	NbD013589.1	1	262	1	266	385.956	203	236	4	262	266	plant-specific SNARE located in cell plate of dividing cells. cofractionates with the cytokinesis-specific syntaxin, KNOLLE, which is required for the formation of the cell plate. protein_coding NOVEL PLANT SNARE 11 (NPSN11) (NSPN11); (ATNPSN11);NOVEL PLANT SNARE 11 (NPSN11)
AT2G18020	A.thaliana TAIR10	1.2e-166	93	238	+/+	NbD017089.1	1	238	1	238	461.07	221	233	0	261	259	Ribosomal protein L2 family;(source:Araport11) protein_coding EMBRYO DEFECTIVE 2296 (EMB2296) EMBRYO DEFECTIVE 2296 (EMB2296);RIBOSOMAL PROTEIN UL2Z (UL2Z)
AT5G04420	A.thaliana TAIR10	0	60	503	+/+	NbD018551.1	4	489	9	509	590.882	301	375	19	495	515	Galactose oxidase/kelch repeat superfamily protein;(source:Araport11) protein_coding
AT1G50180	A.thaliana TAIR10	9.99e-60	31	533	+/+	NbD022579.1	1	494	1	523	219.164	163	274	49	873	858	Host immune receptor which recognizes the conserved effectors AvrE and HopAA1. protein_coding CEL-ACTIVATED RESISTANCE 1 (CAR1) CEL-ACTIVATED RESISTANCE 1 (CAR1)
AT3G21240	A.thaliana TAIR10	0	72	543	+/+	NbD024229.1	11	547	18	557	809.675	391	460	9	547	557	encodes an isoform of 4-coumarate:CoA ligase (4CL), which is involved in the last step of the general phenylpropanoid pathway. The catalytic efficiency was in the following (descending) order: p-coumaric acid, caffeic acid, ferulic acid, 5-OH-ferulic acid and cinnamic acid. At4CL2 was unable to use sinapic acid as substrate. protein_coding 4-COUMARATE:COA LIGASE 2 (4CL2) 4-COUMARATE:COA
AT1G74050	A.thaliana TAIR10	3.07e-99	79	224	+/+	NbD026973.1	8	231	12	234	288.5	177	193	1	231	234	Ribosomal protein L6 family protein;(source:Araport11) protein_coding RIBOSOMAL PROTEIN EL6X (EL6X) RIBOSOMAL PROTEIN EL6X (EL6X)
AT1G78380	A.thaliana TAIR10	1.43e-114	76	222	+/+	NbD028041.1	1	222	1	220	326.25	169	188	2	222	220	Encodes a glutathione transferase that is a member of Tau GST gene family. Expression is induced by drought stress, oxidative stress, and high doses of auxin and cytokinin. naming convention according to Wagner et al. (2002) The expression of this gene is upregulated by herbicide safeners such as benoxacor and fenclorim. protein_coding GLUTATHIONE S-TRANSFERASE TAU 19 (GSTU19)
AT5G59240	A.thaliana TAIR10	5.02e-97	82	206	+/+	NbD029254.1	1	206	1	196	281.567	169	178	10	222	211	Ribosomal protein S8e family protein;(source:Araport11) protein_coding RIBOSOMAL PROTEIN ES8Y (ES8Y) RIBOSOMAL PROTEIN ES8Y (ES8Y)
AT1G30270	A.thaliana TAIR10	0	84	438	+/+	NbD029515.1	14	450	28	465	782.326	369	407	1	451	483	Arabidopsis thaliana CBL-interacting protein kinase 23. CIPK23 serves as a positive regulator of the potassium transporter AKT1 by directly phosphorylating AKT1. CIPK23 is activated by the binding of two calcineurin B-like proteins, CBL1 and CBL9. The mRNA is cell-to-cell mobile. protein_coding CBL-INTERACTING PROTEIN KINASE 23 (CIPK23) (ATCIPK23);SOS2-LIKE PROTEIN KINASE 17
AT5G05850	A.thaliana TAIR10	1.27e-162	55	524	+/+	NbD029921.1	4	526	6	507	471.47	287	366	23	526	507	Encodes PIRL1, a member of the Plant Intracellular Ras-group-related LRRs (Leucine rich repeat proteins). PIRLs are a distinct, plant-specific class of intracellular LRRs that likely mediate protein interactions, possibly in the context of signal transduction. PIRL1 (AT5G05850) and PIRL9 (AT3G11330) are genetically redundant and are required for differentiation of microspores into pollen.
AT3G10660	A.thaliana TAIR10	0	85	485	+/+	NbD030449.1	89	573	161	645	825.083	413	452	0	579	647	predicted to encode calcium-dependent protein kinase and is localized to the ER. Protein is myristoylated in a cell-free extract. Changing the proposed myristoylated site, G residue in the amino terminal, to A prevented the meristoylation . The G to A mutation decreased AtCPK2 membrane association by approximately 50%. protein_coding CALMODULIN-DOMAIN PROTEIN KINASE CDPK ISOFORM 2
AT1G76550	A.thaliana TAIR10	0	83	603	+/+	NbD032444.1	1	603	1	603	1056.2	502	558	0	617	618	Phosphofructokinase family protein. Target of miRNA sRNA6. protein_coding
AT4G28080	A.thaliana TAIR10	0	55	1399	+/+	NbD035909.1	1	1353	1	1382	1313.52	764	956	63	1710	1820	Encodes REDUCED CHLOROPLAST COVERAGE 2 (REC2). Along with REC1 and REC3 it contributes to establishing the size of the chloroplast compartment. protein_coding REDUCED CHLOROPLAST COVERAGE 2 (REC2) REDUCED CHLOROPLAST COVERAGE 2 (REC2)
AT1G21630	A.thaliana TAIR10	0	50	864	+/+	NbD038514.1	364	1144	411	1219	643.654	429	533	138	1144	1219	TPLATE Adaptor complex subunit. protein_coding ARABIDOPSIS THALIANA EH DOMAIN CONTAINING PROTEIN 2 (ATEH2) ARABIDOPSIS THALIANA EH DOMAIN CONTAINING PROTEIN 2 (ATEH2)
AT3G54360	A.thaliana TAIR10	2.11e-173	66	376	+/+	NbD038769.1	5	377	31	398	489.189	248	293	11	383	406	Encodes a catalase chaperon that is essential for catalase activity. Required for multiple stress responses. protein_coding NO CATALASE ACTIVITY 1 (NCA1) NO CATALASE ACTIVITY 1 (NCA1)
AT4G00752	A.thaliana TAIR10	1.78e-33	62	94	+/+	NbD039501.1	508	601	375	468	133.65	58	79	0	602	470	UBX domain-containing protein;(source:Araport11) protein_coding
AT4G32410	A.thaliana TAIR10	0	85	1086	+/+	NbD040723.1	1	1083	1	1080	1865.89	920	1002	9	1086	1082	Encodes a cellulose synthase isomer. CESA1 mutants have cellulose defect in the primary cell wall. Multiple lines of evidence suggest that CESA1, along with CESA3 and CESA6 are present in the same plasma membrane complex for cellulose biosynthesis. lasma membrane complex for cellulose biosynthesis. As inferred from the null role of secondary wall-type CesAs, included in a set of five prim
AT5G24430	A.thaliana TAIR10	0	77	459	+/+	NbD041660.1	130	588	128	586	704.516	352	404	0	598	595	Calcium-dependent protein kinase (CDPK) family protein;(source:Araport11) protein_coding
AT3G09630	A.thaliana TAIR10	0	81	407	+/+	NbD045703.1	1	406	1	407	593.964	329	367	1	406	407	Ribosomal protein L4/L1 family;(source:Araport11) protein_coding SUPPRESSOR OF ACAULIS 56 (SAC56) SUPPRESSOR OF ACAULIS 56 (SAC56);RIBOSOMAL PROTEIN UL4Z (UL4Z)
AT4G02350	A.thaliana TAIR10	0	74	805	+/+	NbD046455.1	1	801	1	788	1167.53	595	690	21	801	788	Encodes a member of the exocyst complex gene family. The exocyst is a protein complex involved in tethering vesicles to the plasma membrane during regulated or polarized secretion. The mRNA is cell-to-cell mobile. protein_coding EXOCYST COMPLEX COMPONENT SEC15B (SEC15B) EXOCYST COMPLEX COMPONENT SEC15B (SEC15B)
AT5G56030	A.thaliana TAIR10	0	94	701	+/+	NbD046535.1	1	700	1	700	1113.98	656	685	2	700	700	A member of heat shock protein 90 (HSP90) gene family. Expressed in all tissues and abundant in root apical meristem, pollen and tapetum. Expression is NOT heat-induced but induced by IAA and NaCl. Interacts with HsfA1d in the cytosol and the nucleus and negatively regulates HsfA1d. Did not bind to AtHsfA4c. The mRNA is cell-to-cell mobile. protein_coding HEAT SHOCK PROTEIN 81-2 (HSP81-
AT5G42250	A.thaliana TAIR10	0	70	380	+/+	NbD047153.1	9	386	10	389	570.081	266	326	2	389	391	Zinc-binding alcohol dehydrogenase family protein;(source:Araport11) protein_coding
AT5G39040	A.thaliana TAIR10	0	76	632	+/+	NbD047299.1	5	636	12	640	880.552	478	547	3	639	645	Encodes a member of TAP subfamily of ABC transporters that is located in the vacuole. Mutants are hypersensitive to aluminum and the gene product may be important for intracellular movement of some substrate, possibly chelated Al, as part of a mechanism of aluminum sequestration. protein_coding ATP-BINDING CASSETTE B27 (ABCB27) ARABIDOPSIS THALIANA TRANSPORTER ASSOCIATED WIT
AT1G09620	A.thaliana TAIR10	0	69	1087	+/+	NbD049531.1	1	1080	1	1082	1522.68	752	898	12	1081	1092	ATP binding/leucine-tRNA ligases/aminoacyl-tRNA ligase;(source:Araport11) protein_coding
AT4G22670	A.thaliana TAIR10	3.9e-25	88	56	+/+	NbD049638.1	357	412	384	439	106.686	49	52	0	415	442	Encodes one of the 36 carboxylate clamp (CC)-tetratricopeptide repeat (TPR) proteins (Prasad 2010, Pubmed ID: 20856808) with potential to interact with Hsp90/Hsp70 as co-chaperones. The mRNA is cell-to-cell mobile. protein_coding HSP70-INTERACTING PROTEIN 1 (HIP1) HSP70-INTERACTING PROTEIN 1 (HIP1);TETRATRICOPEPTIDE REPEAT 11 (TPR11);HSP70-INTERACTING PROTEIN 1 (AtHip1)
AT2G18040	A.thaliana TAIR10	1.42e-64	77	120	+/+	NbD049767.1	1	119	1	120	191.815	92	107	1	119	120	phosphorylation-specific peptidyl prolyl cis/trans isomerase (PPIase) with specificity for phosphoserine-proline bonds The mRNA is cell-to-cell mobile. protein_coding PEPTIDYLPROLYL CIS/TRANS ISOMERASE, NIMA-INTERACTING 1 (PIN1AT) PEPTIDYLPROLYL CIS/TRANS ISOMERASE, NIMA-INTERACTING 1 (PIN1AT)
AT3G17440	A.thaliana TAIR10	1.68e-159	85	268	+/+	NbD051328.1	5	270	4	270	444.121	227	250	3	270	270	member of NPSN Gene Family; TGN/PM localized. protein_coding NOVEL PLANT SNARE 13 (NPSN13) NOVEL PLANT SNARE 13 (NPSN13); (ATNPSN13)
AT1G06850	A.thaliana TAIR10	3.94e-55	69	131	+/+	NbD051522.1	131	260	116	246	179.874	91	109	1	321	251	bZIP protein involved in heat stress response. Under heat stress localization moves exclusively to nucleus. protein_coding BASIC LEUCINE-ZIPPER 52 (bZIP52) BASIC LEUCINE-ZIPPER 52 (bZIP52);BASIC LEUCINE-ZIPPER 52 (AtbZIP52)
AT5G64140	A.thaliana TAIR10	7.37e-24	84	51	+/+	NbD051686.1	1	51	1	50	84.7297	43	46	1	66	65	Encodes a putative ribosomal protein S28. protein_coding RIBOSOMAL PROTEIN S28 (RPS28) RIBOSOMAL PROTEIN ES28X (ES28X);RIBOSOMAL PROTEIN S28 (RPS28)
AT3G24550	A.thaliana TAIR10	0	82	393	+/+	NbE03055723.1	233	624	252	642	651.358	322	359	3	640	653	Encodes a member of the proline-rich extensin-like receptor kinase (PERK) family. This family consists of 15 predicted receptor kinases (PMID: 15653807). The mRNA is cell-to-cell mobile. protein_coding PROLINE-RICH EXTENSIN-LIKE RECEPTOR KINASE 1 (PERK1) PROLINE-RICH EXTENSIN-LIKE RECEPTOR KINASE 1 (ATPERK1);PROLINE-RICH EXTENSIN-LIKE RECEPTOR KINASE 1 (PERK1)
AT1G75720	A.thaliana TAIR10	0.0142	71	21	+/+	NbE03057920.1	17	37	8	28	37.3502	15	19	0	676	194	WEB family protein (DUF827);(source:Araport11) protein_coding
AT5G66030	A.thaliana TAIR10	0	61	742	+/+	NbE03059398.1	44	774	15	750	676.396	451	579	17	809	766	Involved in golgi protein trafficking. AtARL1 binds directly to the GRIP domain of AtGRIP in a GTP-dependent manner. Localized to the golgi apparatus, tyrosine 717 in AtGRIP is crucial for Golgi localization. protein_coding (ATGRIP) (GRIP); (ATGRIP)
AT5G04420	A.thaliana TAIR10	0	58	503	+/+	NbE03061162.1	4	489	9	509	576.244	293	367	19	495	515	Galactose oxidase/kelch repeat superfamily protein;(source:Araport11) protein_coding
AT5G59890	A.thaliana TAIR10	9.85e-83	81	140	+/+	NbE03061602.1	1	140	1	140	239.195	113	124	0	140	140	actin depolymerizing factor 4 (ADF4) mRNA, complete cds protein_coding ACTIN DEPOLYMERIZING FACTOR 4 (ADF4) (ATADF4);ACTIN DEPOLYMERIZING FACTOR 4 (ADF4)
AT3G43300	A.thaliana TAIR10	0	68	986	+/+	NbE05062828.1	1	965	14	981	1261.9	674	778	39	1681	1759	AtMIN7 is an immunity associated Arabidopsis protein targeted by HopM1, a conserved Pseudomonas syringae virulence protein. AtMIN7 encodes one of the eight members of the Arabidopsis adenosine diphosphate (ADP) ribosylation factor (ARF) guanine nucleotide exchange factor (GEF) protein family. The AFR GEF proteins are key components of the vesicle trafficking system in eukaryotic cells.
AT2G26570	A.thaliana TAIR10	0	64	629	+/+	NbE05063196.1	224	835	112	735	577.015	404	497	22	917	808	Encodes a coiled-coil protein WEB1 (weak chloroplast movement under blue light 1). WEB1, together with another coiled-coil protein WEB2/PMI2 (At1g66840), maintains the chloroplast photorelocation movement velocity. protein_coding WEAK CHLOROPLAST MOVEMENT UNDER BLUE LIGHT 1 (WEB1) WEAK CHLOROPLAST MOVEMENT UNDER BLUE LIGHT 1 (WEB1)
AT3G43300	A.thaliana TAIR10	0	68	1777	+/+	NbE05063856.1	1	1730	35	1756	2314.65	1211	1396	102	1732	1759	AtMIN7 is an immunity associated Arabidopsis protein targeted by HopM1, a conserved Pseudomonas syringae virulence protein. AtMIN7 encodes one of the eight members of the Arabidopsis adenosine diphosphate (ADP) ribosylation factor (ARF) guanine nucleotide exchange factor (GEF) protein family. The AFR GEF proteins are key components of the vesicle trafficking system in eukaryotic cells.
AT1G01320	A.thaliana TAIR10	0	76	507	+/+	NbE05064444.1	654	1146	636	1138	782.711	385	434	18	1875	1798	Encodes REDUCED CHLOROPLAST COVERAGE 1 (REC1) a protein with similarity to the FLOURY locus in maize. Located in the nucleus and cytosol. Contributes to establishing the size of the chloroplast compartment. protein_coding REDUCED CHLOROPLAST COVERAGE (REC1) FLOURY ENDOSPERM LIKE 2 (FLL2);REDUCED CHLOROPLAST COVERAGE (REC1)
AT1G16860	A.thaliana TAIR10	2.98e-180	61	487	+/+	NbE05065401.1	1	435	1	475	511.531	295	344	64	435	475	Plasma membrane-localized proteins that negatively regulate cellulose synthesis by inhibiting the exocytosis of CESAs. protein_coding (SHOU4L) (SHOU4L)
AT2G27460	A.thaliana TAIR10	0	79	746	+/+	NbE05065529.1	1	743	1	746	1190.64	593	663	3	743	746	Sec23 homolog , forms a distinct clade with SEC23A.Mutants have defects in pollen exine patterning, tapetal development and pollen intine formation. protein_coding (ATSEC23D) (ATSEC23D)
AT3G16780	A.thaliana TAIR10	1.04e-110	91	186	+/+	NbE05065846.1	1	186	1	186	315.849	169	178	0	215	210	Ribosomal protein L19e family protein;(source:Araport11) protein_coding RIBSOMAL PROTEIN LIKE 19B (RPL19B) RIBSOMAL PROTEIN LIKE 19B (RPL19B);RIBOSOMAL PROTEIN EL19Z (EL19Z)
AT3G05420	A.thaliana TAIR10	0	72	674	+/+	NbE05065906.1	3	672	2	667	885.945	485	557	12	673	669	Acyl-CoA binding protein with high affinity for oleoyl-CoA. Expressed in all plant organs. Involved in fatty acid transport. Plays a role in determining seed oil content. protein_coding ACYL-COA BINDING PROTEIN 4 (ACBP4) ACYL-COA BINDING PROTEIN 4 (ACBP4); (ATACBP4)
AT3G61570	A.thaliana TAIR10	2.41e-130	48	677	+/+	NbE05066076.1	1	616	1	659	402.519	322	434	79	718	713	This gene is predicted to encode a protein that functions as a Golgi apparatus structural component known as a golgin in mammals and yeast. A fluorescently-tagged version of GC3 co-localizes with Golgi markers, and this localization appears to be replicated using the C-terminal (161 aa) portion of the protein. protein_coding GRIP-RELATED ARF-BINDING DOMAIN-CONTAINING PROTEIN 1 (G
AT5G59210	A.thaliana TAIR10	2.02e-149	59	434	+/+	NbE05068445.1	1	382	1	432	429.483	254	325	54	384	435	myosin heavy chain-like protein;(source:Araport11) protein_coding
AT2G22125	A.thaliana TAIR10	0	93	382	+/+	NbE44070891.1	1671	2052	1769	2149	708.368	356	375	1	2060	2151	Encodes a protein involved in cell elongation in root and anther filaments. Mutants have greater cell volumes in root tissues and have additive phenotypes with other cell expansion mutants such as those carrying mutations in COB, QUI and POM1 loci. POM2/CSI1 promotes Cellulose Synthase and microtubule co-alignment. The mRNA is cell-to-cell mobile. protein_coding CELLULOSE SYNTHASE-INTE
AT1G46264	A.thaliana TAIR10	1.64e-44	77	91	+/+	NbE44072724.1	36	126	35	125	160.229	70	77	0	504	349	Encodes SCHIZORIZA, a member of Heat Shock Transcription Factor (Hsf) family. Functions as a nuclear factor regulating asymmetry of stem cell divisions. protein_coding HEAT SHOCK TRANSCRIPTION FACTOR B4 (HSFB4) HEAT SHOCK TRANSCRIPTION FACTOR B4 (HSFB4); (AT-HSFB4);SCHIZORIZA (SCZ)
