# Supplementary material for: Pupylation-based proximity labelling reveals regulatory factors in cellulose biosynthesis in Arabidopsis
Source: Research Square preprint supplement (doi:10.21203/rs.3.rs-3849556/v1), 2024-09-30
Supplement: Supplementary file 3 [file ad0ace24faae0b6ebe4a5995.xlsx]

## Sheet: CC1 and LTI6B LFQ (Ara)
Log2 transformed LFQ of proteins detected in samples from PafA-CC1 or PafA-LTI6B
LFQ intensity Lti6B_rep1	LFQ intensity Lti6B_rep2	LFQ intensity Lti6B_rep3	LFQ intensity CC1_rep1	LFQ intensity CC1_rep2	LFQ intensity CC1_rep3	C: Only identified by site	C: Reverse	C: Potential contaminant	C: Taxonomy IDs	N: Peptides	N: Razor + unique peptides	N: Unique peptides	N: Sequence coverage [%]	N: Unique + razor sequence coverage [%]	N: Unique sequence coverage [%]	N: Mol. weight [kDa]	N: Q-value	N: Score	N: Intensity	N: iBAQ peptides	N: MS/MS count	T: Protein IDs	T: Majority protein IDs	T: id
NaN	NaN	NaN	16.0402	16.039	NaN				-1	3	3	2	24.5	24.5	21.2	24.484	0	38.55	580370	6	9	AT1G01050.2;AT1G01050.1;AT4G01480.2;AT4G01480.1;AT3G53620.1;AT2G46860.1	AT1G01050.2;AT1G01050.1;AT4G01480.2;AT4G01480.1	0
15.014	NaN	NaN	14.8563	14.8253	15.3106				-1	4	4	4	19.6	19.6	19.6	47.173	0	29.569	343000	24	11	AT1G01090.1	AT1G01090.1	1
17.7754	17.7932	NaN	17.8671	17.8444	17.8462				-1	3	2	2	77.7	49.1	49.1	11.162	0	24.261	2486100	3	12	AT1G01100.4;AT1G01100.2;AT1G01100.1;AT1G01100.3	AT1G01100.4;AT1G01100.2;AT1G01100.1;AT1G01100.3	2
15.2328	NaN	NaN	15.51	NaN	NaN				-1	2	2	2	7.8	7.8	7.8	52.175	0	22.898	258120	25	8	AT1G01300.1	AT1G01300.1	3
15.5027	16.1881	15.9981	17.3297	17.0233	17.1093				-1	19	19	15	20.6	20.6	16.8	197.5	0	286.59	2361500	82	55	AT1G01320.2;AT1G01320.3;AT1G01320.1	AT1G01320.2;AT1G01320.3;AT1G01320.1	4
NaN	NaN	NaN	NaN	NaN	NaN				-1	1	1	1	6.7	6.7	6.7	38.71	0.0028986	6.4467	66123	20	2	AT1G01350.1;AT5G06420.2;AT5G06420.1	AT1G01350.1;AT5G06420.2;AT5G06420.1	5
NaN	14.6427	NaN	15.1217	15.1144	14.8919				-1	3	3	3	7.7	7.7	7.7	70.149	0	84.668	307350	28	11	AT1G01510.1	AT1G01510.1	6
16.9426	17.2432	17.5519	NaN	NaN	NaN				-1	10	10	10	59.2	59.2	59.2	29.216	0	90.904	1658100	16	24	AT1G01630.1	AT1G01630.1	7
NaN	17.506	17.3868	17.4288	17.458	17.3764				-1	6	6	6	30	30	30	39.67	0	46.632	1489300	17	20	AT1G01910.4;AT1G01910.2;AT1G01910.1;AT1G01910.5;AT1G01910.3	AT1G01910.4;AT1G01910.2;AT1G01910.1;AT1G01910.5;AT1G01910.3	8
NaN	NaN	NaN	NaN	NaN	NaN				-1	2	2	1	7.6	7.6	4.1	65.259	0	10.744	94705	31	3	AT1G01930.1	AT1G01930.1	9
NaN	NaN	NaN	17.4224	17.3651	17.3769				-1	12	12	12	24.2	24.2	24.2	98.421	0	147.37	2103500	50	35	AT1G01950.1;AT1G01950.2;AT1G01950.3;AT1G01950.4	AT1G01950.1;AT1G01950.2;AT1G01950.3;AT1G01950.4	10
16.2221	16.7671	16.6549	17.0073	16.9498	16.4909				-1	11	11	10	11.8	11.8	11.2	194.94	0	100.16	1597900	89	32	AT1G01960.1	AT1G01960.1	11
NaN	NaN	NaN	NaN	NaN	NaN				-1	1	1	1	0.7	0.7	0.7	263.76	0.00040933	8.1901	103370	104	5	AT1G02080.2;AT1G02080.3;AT1G02080.1	AT1G02080.2;AT1G02080.3;AT1G02080.1	12
16.2323	16.1366	16.1748	16.0933	16.3189	16.3301				-1	8	8	8	24.8	24.8	24.8	59.882	0	128.33	1317100	31	29	AT1G02150.1	AT1G02150.1	13
NaN	17.1333	NaN	NaN	16.9077	NaN				-1	3	3	3	19.9	19.9	19.9	32.925	0	54.871	956640	15	9	AT1G02280.2;AT1G02280.1	AT1G02280.2;AT1G02280.1	14
NaN	14.9103	15.4207	NaN	NaN	14.9002				-1	1	1	1	5	5	5	40.033	0	18.529	204070	16	9	AT1G02305.1;AT1G02300.1	AT1G02305.1;AT1G02300.1	15
16.8188	16.764	17.0831	16.7191	16.899	16.9932				-1	21	12	7	66.2	44.8	29	43.158	0	181.96	3219500	20	56	AT1G02500.2;AT1G02500.1	AT1G02500.2;AT1G02500.1	16
NaN	NaN	NaN	NaN	NaN	NaN				-1	5	1	1	7.1	1.3	1.3	137.67	0.00040717	8.0709	66499	63	4	AT1G02520.3;AT1G02520.2;AT1G02520.1	AT1G02520.3;AT1G02520.2;AT1G02520.1	17
NaN	NaN	NaN	NaN	NaN	NaN				-1	3	2	2	3.3	3.3	3.3	136.77	0	11.898	69608	65	2	AT1G02530.1	AT1G02530.1	18
NaN	NaN	NaN	NaN	NaN	NaN				-1	1	1	1	5.7	5.7	5.7	32.356	0	25.65	157280	16	6	AT1G02560.1	AT1G02560.1	19
NaN	NaN	NaN	NaN	NaN	NaN				-1	2	1	1	4.5	2.6	2.6	59.388	0.00042212	9.1606	25402	26	2	AT1G02690.1;AT1G02690.2	AT1G02690.1;AT1G02690.2	20
18.7673	NaN	18.8452	NaN	18.8979	NaN				-1	7	7	2	21.5	21.5	12.1	24.606	0	125.71	3723100	6	18	AT1G02780.1	AT1G02780.1	21
NaN	NaN	NaN	NaN	NaN	NaN				-1	3	3	2	20.2	20.2	16.5	30.508	0	31.486	133120	13	5	AT1G02840.5;AT1G02840.4;AT1G02840.3;AT1G02840.2;AT1G02840.1	AT1G02840.5;AT1G02840.4;AT1G02840.3;AT1G02840.2;AT1G02840.1	22
NaN	NaN	NaN	NaN	NaN	NaN				-1	1	1	1	1.5	1.5	1.5	132.89	0.00039904	7.7213	52921	60	3	AT1G02890.2;AT1G02890.1;AT4G02480.1	AT1G02890.2;AT1G02890.1;AT4G02480.1	23
18.4541	18.4364	18.6038	18.3112	18.3276	18.4995				-1	19	8	8	91.4	64.1	64.1	23.598	0	161.43	10588000	13	66	AT1G02920.1	AT1G02920.1	24
19.5642	19.4734	19.6641	19.3191	19.3686	19.5503				-1	20	20	9	89.4	89.4	57.2	23.486	0	323.31	26442000	13	131	AT1G02930.2;AT1G02930.1	AT1G02930.2;AT1G02930.1	25
NaN	NaN	NaN	NaN	NaN	NaN				-1	2	2	2	4.7	4.7	4.7	103.04	0	12.083	56373	51	3	AT1G03000.1	AT1G03000.1	26
16.1825	16.1681	16.2046	15.1585	15.0319	14.7733				-1	13	13	13	6.4	6.4	6.4	397.66	0	191.71	1288600	170	37	AT1G03060.3;AT1G03060.4;AT1G03060.2;AT1G03060.1;AT4G02660.3;AT4G02660.1;AT4G02660.2	AT1G03060.3;AT1G03060.4;AT1G03060.2;AT1G03060.1	27
NaN	NaN	NaN	NaN	NaN	NaN				-1	1	1	1	2.4	2.4	2.4	47.881	0.0066387	5.9995	43057	23	1	AT1G03140.1	AT1G03140.1	28
NaN	NaN	NaN	NaN	NaN	NaN				-1	1	1	1	8	8	8	31.71	0.0011368	6.9884	26523	9	1	AT1G03210.1;AT1G03210.2	AT1G03210.1;AT1G03210.2	29
15.5726	15.7903	15.8961	15.2318	15.7665	15.362				-1	3	3	3	10.4	10.4	10.4	45.717	0	25.573	581210	22	13	AT1G03220.1;AT1G03230.1	AT1G03220.1	30
NaN	NaN	NaN	NaN	NaN	NaN				-1	2	2	2	7.3	7.3	7.3	54.123	0	11.344	35164	26	3	AT1G03280.3;AT1G03280.2;AT1G03280.1	AT1G03280.3;AT1G03280.2;AT1G03280.1	31
NaN	NaN	NaN	15.5001	NaN	15.8714				-1	2	2	2	8.3	8.3	8.3	51.895	0	22.296	280400	20	9	AT1G03350.1	AT1G03350.1	32
NaN	NaN	NaN	NaN	NaN	NaN				-1	2	2	2	8.3	8.3	8.3	43.796	0	14.193	70940	24	2	AT1G03475.1;AT4G03205.1;AT4G03205.2	AT1G03475.1;AT4G03205.1;AT4G03205.2	33
NaN	NaN	NaN	NaN	NaN	NaN				-1	6	6	6	32.8	32.8	32.8	43.625	0	81.588	440850	24	12	AT1G03630.2;AT1G03630.1	AT1G03630.2;AT1G03630.1	34
18.1487	18.1189	18.0984	17.8321	17.6922	17.8543				-1	13	13	10	64	64	51.7	31.81	0	255.35	7117700	14	63	AT1G03860.1;AT1G03860.3;AT1G03860.2	AT1G03860.1;AT1G03860.3;AT1G03860.2	35
15.5568	15.4393	NaN	NaN	NaN	NaN				-1	6	6	6	22.9	22.9	22.9	50.558	0	53.699	283670	19	9	AT1G03880.1	AT1G03880.1	36
NaN	NaN	NaN	NaN	NaN	NaN				-1	1	1	1	7	7	7	29.795	0.00078003	7.313	71199	15	4	AT1G03900.1	AT1G03900.1	37
NaN	NaN	NaN	NaN	NaN	NaN				-1	2	2	1	9	9	4.8	32.421	0	20.528	88405	13	4	AT1G03905.1;AT1G03905.4;AT1G03905.3;AT1G03905.2	AT1G03905.1;AT1G03905.4;AT1G03905.3;AT1G03905.2	38
NaN	NaN	NaN	NaN	NaN	NaN				-1	1	1	1	2.5	2.5	2.5	53.001	0.00040161	7.823	54270	28	2	AT1G03930.1;AT5G44100.2;AT5G44100.1	AT1G03930.1;AT5G44100.2;AT5G44100.1	39
14.9153	NaN	14.6234	NaN	NaN	NaN				-1	4	4	4	24	24	24	31.096	0	23.375	166840	17	6	AT1G04040.1	AT1G04040.1	40
NaN	NaN	NaN	NaN	NaN	NaN				-1	1	1	1	1.4	1.4	1.4	164.6	0.0056537	6.0958	14503	71	2	AT1G04120.3;AT3G13080.2;AT1G04120.2;AT3G13080.5;AT3G13080.1;AT1G04120.1	AT1G04120.3;AT3G13080.2;AT1G04120.2;AT3G13080.5;AT3G13080.1;AT1G04120.1	41
NaN	NaN	NaN	NaN	NaN	NaN				-1	1	1	1	1.2	1.2	1.2	113.93	0.0011394	7.0259	125650	54	4	AT1G04150.1	AT1G04150.1	42
17.4313	17.4054	17.4409	17.3192	17.2318	16.9767				-1	7	7	7	24.7	24.7	24.7	50.853	0	77.599	2194000	19	33	AT1G04170.2;AT1G04170.1	AT1G04170.2;AT1G04170.1	43
NaN	NaN	NaN	NaN	NaN	NaN				-1	1	1	1	2.7	2.7	2.7	59.527	0.0028996	6.4474	53020	29	1	AT1G04220.1;AT5G43760.1	AT1G04220.1;AT5G43760.1	44
20.6449	20.7574	20.806	20.1846	20.2687	20.1231				-1	7	7	2	53	53	8.6	17.058	0	268.18	24614000	7	67	AT1G04270.2;AT1G04270.1	AT1G04270.2;AT1G04270.1	45
19.4657	19.5095	19.3838	20.3644	20.2582	20.2875				-1	14	14	8	67.2	67.2	50	35.571	0	238.81	20268000	18	71	AT1G04410.1	AT1G04410.1	46
NaN	NaN	NaN	NaN	NaN	NaN				-1	2	1	1	4.5	2.4	2.4	70.507	0.00039761	7.6457	15528	35	1	AT1G04430.3;AT1G04430.2;AT1G04430.1	AT1G04430.3;AT1G04430.2;AT1G04430.1	47
15.917	15.725	15.8972	NaN	15.4909	15.8416				-1	5	5	5	15.9	15.9	15.9	56.881	0	37.47	579280	26	15	AT1G04510.2;AT1G04510.1	AT1G04510.2;AT1G04510.1	48
16.7637	16.7616	16.8018	17.7828	18.2154	17.8716				-1	4	4	4	23.5	23.5	23.5	36.538	0	161.14	1892400	19	16	AT1G04690.1	AT1G04690.1	49
17.7579	17.4875	17.4298	16.4878	16.4908	16.5188				-1	4	4	4	26	26	26	24.765	0	116.96	2682000	15	27	AT1G04750.1;AT2G33120.1;AT2G33120.2;AT1G04750.4;AT1G04750.3;AT1G04750.2;AT2G33120.3;AT1G04760.2;AT1G04760.1;AT2G32670.1	AT1G04750.1;AT2G33120.1;AT2G33120.2;AT1G04750.4;AT1G04750.3;AT1G04750.2	50
NaN	NaN	NaN	NaN	NaN	NaN				-1	2	2	2	7.5	7.5	7.5	74.359	0	12.431	101560	38	6	AT1G04780.1	AT1G04780.1	51
NaN	NaN	NaN	NaN	NaN	NaN				-1	8	3	3	17	5	5	108.86	0	31.739	101350	41	4	AT1G04810.1	AT1G04810.1	52
18.9882	18.8036	19.0139	18.8879	18.9916	18.9843				-1	16	16	5	51.8	51.8	20.4	49.537	0	323.31	14785000	21	81	AT4G14960.2;AT1G50010.1;AT1G04820.1;AT4G14960.1	AT4G14960.2;AT1G50010.1;AT1G04820.1;AT4G14960.1	53
NaN	NaN	NaN	15.7677	15.7315	NaN				-1	2	2	2	8.2	8.2	8.2	46.603	0	15.54	165470	15	4	AT1G04850.1;AT1G04850.2	AT1G04850.1;AT1G04850.2	54
NaN	15.2844	14.9829	15.6245	15.174	15.3231				-1	4	4	3	21.1	21.1	19.2	36.676	0	33.061	479260	14	13	AT1G05010.1	AT1G05010.1	55
NaN	NaN	NaN	NaN	NaN	NaN				-1	4	2	2	8	3.2	3.2	90.168	0	17.013	317170	43	4	AT1G05150.1	AT1G05150.1	56
20.3518	20.4867	20.4644	19.709	19.7453	19.3929				-1	15	15	15	58.3	58.3	58.3	24.705	0	323.31	27166000	14	105	AT1G05190.1	AT1G05190.1	57
NaN	NaN	NaN	NaN	NaN	NaN				-1	4	4	4	21.8	21.8	21.8	35.624	0	23.132	133020	18	6	AT1G05250.1;AT1G05240.1	AT1G05250.1;AT1G05240.1	58
NaN	NaN	NaN	NaN	15.5051	15.6526				-1	3	2	2	6.7	4.6	4.6	76.499	0	35.093	218300	40	5	AT1G05320.6;AT1G05320.5;AT1G05320.9;AT1G05320.8;AT1G05320.7;AT1G05320.4;AT1G05320.3;AT1G05320.2;AT1G05320.1	AT1G05320.6;AT1G05320.5;AT1G05320.9;AT1G05320.8;AT1G05320.7;AT1G05320.4;AT1G05320.3;AT1G05320.2;AT1G05320.1	59
NaN	NaN	NaN	15.4903	15.4217	NaN				-1	4	4	4	11.4	11.4	11.4	47.02	0	24.824	368340	18	11	AT1G05350.1	AT1G05350.1	60
NaN	NaN	NaN	14.7487	14.8516	14.9044				-1	3	3	3	10.5	10.5	10.5	62.928	0	21.387	219820	27	9	AT1G05500.1;AT1G05500.2	AT1G05500.1;AT1G05500.2	61
15.8106	15.7005	NaN	NaN	16.3856	NaN				-1	6	6	6	54.8	54.8	54.8	27.293	0	41.411	854990	13	20	AT1G05510.1	AT1G05510.1	62
NaN	NaN	NaN	16.4367	16.3829	16.4812				-1	4	4	4	15.9	15.9	15.9	51.05	0	51.645	599190	19	12	AT1G05680.1;AT1G05675.1	AT1G05680.1	63
NaN	NaN	NaN	NaN	NaN	NaN				-1	1	1	1	2.8	2.8	2.8	94.98	0.00040519	7.9784	37741	38	2	AT1G05700.1;AT1G05700.2	AT1G05700.1;AT1G05700.2	64
NaN	NaN	NaN	NaN	NaN	NaN				-1	2	2	2	14.2	14.2	14.2	24.21	0	13.172	99662	17	4	AT1G05810.1;AT1G05810.2	AT1G05810.1;AT1G05810.2	65
NaN	NaN	NaN	NaN	NaN	NaN				-1	1	1	1	2.5	2.5	2.5	48.122	0.0053116	6.1309	250060	19	5	AT1G06000.1	AT1G06000.1	66
16.7505	16.4294	16.2272	NaN	NaN	NaN				-1	3	3	3	12.3	12.3	12.3	32.596	0	21.364	488380	15	9	AT1G06190.2;AT1G06190.4;AT1G06190.3;AT1G06190.1;AT1G06190.5	AT1G06190.2;AT1G06190.4;AT1G06190.3;AT1G06190.1;AT1G06190.5	67
NaN	NaN	NaN	16.8315	NaN	16.728				-1	2	2	2	14.3	14.3	14.3	31.38	0	25.687	491370	14	6	AT1G06210.2;AT1G06210.1	AT1G06210.2;AT1G06210.1	68
16.2406	16.245	16.445	16.0205	16.1902	16.0846				-1	11	11	11	18.8	18.8	18.8	110.44	0	149.7	1811200	50	41	AT1G06220.3;AT1G06220.2;AT1G06220.1;AT5G25230.2;AT5G25230.1	AT1G06220.3;AT1G06220.2;AT1G06220.1;AT5G25230.2;AT5G25230.1	69
NaN	15.0377	14.1556	14.6865	NaN	14.5321				-1	3	3	3	8.9	8.9	8.9	75.675	0	57.841	236850	40	11	AT1G06290.1;AT3G06690.1	AT1G06290.1	70
NaN	NaN	NaN	NaN	NaN	NaN				-1	3	3	3	6.1	6.1	6.1	96.687	0	22.058	84050	46	4	AT1G06410.3;AT1G06410.2;AT1G06410.1	AT1G06410.3;AT1G06410.2;AT1G06410.1	71
16.9824	16.941	16.7321	15.8393	15.562	15.8604				-1	6	6	6	25.1	25.1	25.1	36.119	0	72.801	1006000	16	20	AT1G06530.1	AT1G06530.1	72
NaN	NaN	NaN	NaN	NaN	NaN				-1	1	1	1	5.7	5.7	5.7	43.257	0.0007716	7.2111	28032	25	1	AT1G06550.1	AT1G06550.1	73
NaN	NaN	NaN	NaN	NaN	NaN				-1	1	1	1	16.8	16.8	16.8	13.443	0	19.276	163950	6	5	AT2G30790.1;AT1G06680.2;AT1G06680.1	AT2G30790.1;AT1G06680.2;AT1G06680.1	74
NaN	NaN	NaN	NaN	NaN	NaN				-1	4	2	2	17.5	9.4	9.4	39.819	0	13.032	115040	23	4	AT1G06700.1;AT1G06700.2;AT1G06700.3;AT3G59350.6;AT3G59350.1;AT3G59350.3;AT2G43230.1;AT3G59350.2;AT3G59350.4;AT2G43230.2;AT2G30730.2;AT2G30730.1;AT4G13190.2;AT1G48210.2;AT1G48210.1;AT1G48210.7;AT1G48210.3;AT1G48210.4;AT1G48210.5;AT4G13190.1;AT1G48210.6;AT4G13190.5;AT4G13190.4;AT3G59350.5;AT4G13190.3	AT1G06700.1;AT1G06700.2;AT1G06700.3;AT3G59350.6;AT3G59350.1;AT3G59350.3;AT2G43230.1;AT3G59350.2;AT3G59350.4;AT2G43230.2	75
17.0887	17.4186	17.3076	16.1224	16.2684	15.8563				-1	3	3	2	23	23	19.3	28.946	0	53.03	1195200	11	17	AT1G06760.1	AT1G06760.1	76
16.0375	NaN	16.3277	NaN	NaN	NaN				-1	3	3	3	5.8	5.8	5.8	105.62	0	47.784	419490	43	8	AT1G06840.1	AT1G06840.1	77
NaN	NaN	NaN	NaN	NaN	NaN				-1	1	1	1	2.2	2.2	2.2	117.17	0.00042159	9.1096	130260	47	2	AT1G06900.1	AT1G06900.1	78
17.0337	17.0948	17.068	17.1574	16.9678	16.9339				-1	20	20	20	31.1	31.1	31.1	112.12	0	240.98	4085300	50	72	AT1G06950.1	AT1G06950.1	79
NaN	NaN	NaN	NaN	NaN	NaN				-1	1	1	1	7.9	7.9	7.9	29.698	0	18.824	87149	13	5	AT1G07080.1	AT1G07080.1	80
NaN	NaN	NaN	15.3116	14.9832	14.9736				-1	2	2	2	6.5	6.5	6.5	82.558	0	16.858	137260	38	6	AT1G07110.1	AT1G07110.1	81
15.1009	NaN	NaN	15.3865	15.3201	15.7057				-1	2	2	2	14.5	14.5	14.5	25.601	0	24.387	331750	13	9	AT1G07140.1;AT5G58590.1	AT1G07140.1;AT5G58590.1	82
NaN	NaN	NaN	NaN	NaN	NaN				-1	1	1	1	11.8	11.8	11.8	12.428	0.00039401	7.4711	39201	8	2	AT2G30000.1;AT1G07170.6;AT1G07170.5;AT1G07170.4;AT1G07170.3;AT1G07170.2;AT1G07170.1	AT2G30000.1;AT1G07170.6;AT1G07170.5;AT1G07170.4;AT1G07170.3;AT1G07170.2;AT1G07170.1	83
17.9036	18.1941	18.0881	18.1075	NaN	NaN				-1	5	5	5	31.3	31.3	31.3	30.142	0	54.993	2407300	14	15	AT1G07320.4;AT1G07320.3;AT1G07320.2;AT1G07320.1	AT1G07320.4;AT1G07320.3;AT1G07320.2;AT1G07320.1	84
NaN	NaN	NaN	NaN	NaN	NaN				-1	5	5	5	16.4	16.4	16.4	53.587	0	33.492	489920	22	12	AT1G07360.1;AT2G29580.1	AT1G07360.1;AT2G29580.1	85
NaN	NaN	NaN	NaN	NaN	NaN				-1	1	1	1	2.5	2.5	2.5	89.352	0	10.538	174510	44	6	AT2G29080.1;AT1G07510.1	AT2G29080.1;AT1G07510.1	86
15.1956	NaN	NaN	NaN	14.8776	14.7596				-1	3	3	3	35	35	35	11.409	0	38.74	313710	6	11	AT5G59970.2;AT5G59970.1;AT5G59690.1;AT3G53730.1;AT3G46320.1;AT3G45930.1;AT2G28740.1;AT1G07820.2;AT1G07820.1;AT1G07660.1;AT1G07660.2	AT5G59970.2;AT5G59970.1;AT5G59690.1;AT3G53730.1;AT3G46320.1;AT3G45930.1;AT2G28740.1;AT1G07820.2;AT1G07820.1;AT1G07660.1;AT1G07660.2	87
15.3908	15.2484	15.5914	NaN	NaN	15.6965				-1	3	3	3	4.1	4.1	4.1	116.18	0	45.73	420940	46	12	AT1G07670.1;AT1G07670.2;AT1G07810.1	AT1G07670.1;AT1G07670.2	88
NaN	NaN	NaN	NaN	NaN	NaN				-1	2	2	2	9.2	9.2	9.2	54.335	0	34.238	176360	24	4	AT1G07720.1;AT1G07720.2	AT1G07720.1;AT1G07720.2	89
19.5982	19.7318	19.7247	18.8821	18.8693	18.6729				-1	6	6	3	46.9	46.9	24.6	14.804	0	148.67	13167000	8	72	AT5G59850.1;AT1G07770.3;AT1G07770.2;AT1G07770.1;AT2G39590.1	AT5G59850.1;AT1G07770.3;AT1G07770.2;AT1G07770.1	90
NaN	NaN	NaN	NaN	NaN	NaN				-1	2	2	2	25.7	25.7	25.7	22.047	0	62.04	260890	7	6	AT1G07780.7;AT5G05590.1;AT1G07780.9;AT1G07780.5;AT1G07780.3;AT1G07780.2;AT1G07780.13;AT1G07780.12;AT1G07780.10;AT1G07780.1;AT5G05590.3;AT1G07780.4;AT1G07780.11;AT5G05590.4;AT1G07780.8;AT1G07780.6	AT1G07780.7;AT5G05590.1;AT1G07780.9;AT1G07780.5;AT1G07780.3;AT1G07780.2;AT1G07780.13;AT1G07780.12;AT1G07780.10;AT1G07780.1;AT5G05590.3;AT1G07780.4;AT1G07780.11;AT5G05590.4;AT1G07780.8;AT1G07780.6	91
17.2965	17.912	17.5606	NaN	NaN	NaN				-1	2	2	2	18.9	18.9	18.9	14.544	0	36.277	1183200	7	12	AT5G02570.1;AT3G53650.1;AT2G37470.1;AT5G22880.1;AT3G46030.1;AT1G07790.1;AT5G59910.1;AT3G45980.1;AT2G28720.1;AT3G09480.1	AT5G02570.1;AT3G53650.1;AT2G37470.1;AT5G22880.1;AT3G46030.1;AT1G07790.1;AT5G59910.1;AT3G45980.1;AT2G28720.1;AT3G09480.1	92
NaN	NaN	NaN	NaN	NaN	NaN				-1	1	1	1	18.1	18.1	18.1	16.886	0	17.579	135700	8	6	AT1G07830.1	AT1G07830.1	93
NaN	14.5568	15.0695	NaN	NaN	NaN				-1	1	1	1	5.8	5.8	5.8	36.354	0.00041929	8.8602	123520	23	6	AT2G28590.2;AT1G07870.1;AT2G28590.1;AT1G07870.2	AT2G28590.2;AT1G07870.1;AT2G28590.1;AT1G07870.2	94
17.6058	17.455	17.4465	18.6376	18.6552	18.655				-1	12	12	12	57	57	57	27.52	0	320.16	7961900	14	63	AT1G07890.6;AT1G07890.8;AT1G07890.7;AT1G07890.5;AT1G07890.4;AT1G07890.3;AT1G07890.2;AT1G07890.1	AT1G07890.6;AT1G07890.8;AT1G07890.7;AT1G07890.5;AT1G07890.4;AT1G07890.3;AT1G07890.2;AT1G07890.1	95
20.27	20.1215	20.1178	20.3964	20.4687	20.5224				-1	21	21	21	57.9	57.9	57.9	49.502	0	323.31	43635000	25	169	AT5G60390.3;AT5G60390.2;AT5G60390.1;AT1G07940.4;AT1G07940.3;AT1G07940.2;AT1G07940.1;AT1G07930.1;AT1G07920.1;AT1G07930.2	AT5G60390.3;AT5G60390.2;AT5G60390.1;AT1G07940.4;AT1G07940.3;AT1G07940.2;AT1G07940.1;AT1G07930.1;AT1G07920.1;AT1G07930.2	96
NaN	NaN	NaN	NaN	NaN	NaN				-1	1	1	1	10.3	10.3	10.3	20.848	0.00043346	10.401	175820	12	6	AT1G08110.3;AT1G08110.2;AT1G08110.1;AT1G08110.4	AT1G08110.3;AT1G08110.2;AT1G08110.1;AT1G08110.4	97
NaN	NaN	NaN	NaN	NaN	NaN				-1	2	2	2	11.8	11.8	11.8	25.158	0	34.359	352090	9	7	AT1G08160.1	AT1G08160.1	98
NaN	NaN	NaN	17.847	17.9315	17.8059				-1	13	3	3	46.5	13.1	13.1	43.79	0	70.614	1500800	26	11	AT1G08200.1	AT1G08200.1	99
NaN	NaN	NaN	NaN	NaN	NaN				-1	3	1	1	20.8	6	6	24.469	0.00042772	9.9537	301430	11	3	AT1G08360.1	AT1G08360.1	100
NaN	NaN	NaN	NaN	NaN	NaN				-1	1	1	1	17.9	17.9	17.9	15.143	0	10.613	570540	4	6	AT1G08380.1	AT1G08380.1	101
NaN	NaN	NaN	NaN	NaN	NaN				-1	1	1	1	4.3	4.3	4.3	60.757	0	11.777	56331	32	2	AT2G27200.1;AT1G08410.1	AT2G27200.1;AT1G08410.1	102
NaN	NaN	NaN	15.9632	15.8936	16.0142				-1	7	7	1	11.6	11.6	4.1	108.08	0	77.267	752420	54	19	AT1G08420.2;AT1G08420.1	AT1G08420.2;AT1G08420.1	103
NaN	NaN	NaN	NaN	NaN	NaN				-1	1	1	1	19	19	19	15.812	0.00041391	8.4733	325400	6	6	AT1G08480.1	AT1G08480.1	104
15.3727	15.6464	15.5467	15.4614	NaN	15.3408				-1	4	4	4	10	10	10	83.283	0	30.341	466330	38	13	AT1G08520.1	AT1G08520.1	105
NaN	NaN	NaN	NaN	NaN	NaN				-1	1	1	1	8.1	8.1	8.1	14.053	0.0014948	6.8476	135770	4	3	AT1G08580.1	AT1G08580.1	106
NaN	NaN	NaN	15.1071	NaN	14.7158				-1	2	2	2	8.5	8.5	8.5	43.269	0	26.607	165810	24	5	AT1G08820.5;AT1G08820.4;AT1G08820.3;AT1G08820.2;AT1G08820.1	AT1G08820.5;AT1G08820.4;AT1G08820.3;AT1G08820.2;AT1G08820.1	107
NaN	NaN	NaN	NaN	NaN	NaN				-1	2	2	2	10.8	10.8	10.8	13.658	0	16.516	249900	6	7	AT5G54640.1;AT4G27230.2;AT4G27230.1;AT3G20670.1;AT1G51060.1;AT1G54690.1;AT1G08880.1	AT5G54640.1;AT4G27230.2;AT4G27230.1;AT3G20670.1;AT1G51060.1;AT1G54690.1;AT1G08880.1	108
16.4711	16.3074	16.335	NaN	NaN	NaN				-1	16	3	3	47.8	11.3	11.3	47.037	0	83.675	468710	25	9	AT1G09100.1	AT1G09100.1	109
18.252	18.1412	18.2415	17.8376	17.9678	18.0546				-1	5	5	5	19.7	19.7	19.7	36.307	0	66.221	3700300	19	23	AT1G09130.1;AT1G09130.2;AT1G09130.3	AT1G09130.1;AT1G09130.2;AT1G09130.3	110
NaN	NaN	NaN	NaN	NaN	NaN				-1	1	1	1	4.4	4.4	4.4	45.78	0.00043011	10.106	10592	25	1	AT1G09160.2;AT1G09160.1	AT1G09160.2;AT1G09160.1	111
NaN	NaN	NaN	NaN	NaN	NaN				-1	1	1	1	3.8	3.8	3.8	49.142	0.0032573	6.4274	53827	27	2	AT1G56340.2;AT1G09210.1;AT1G56340.1	AT1G56340.2;AT1G09210.1;AT1G56340.1	112
18.7313	19.0497	19.0512	18.8229	18.9409	NaN				-1	4	4	4	15.8	15.8	15.8	50.078	0	27.129	2753000	21	13	AT1G09270.3;AT1G09270.2;AT1G09270.1	AT1G09270.3;AT1G09270.2;AT1G09270.1	113
17.7382	17.5538	17.64	17.275	17.2997	17.2841				-1	9	9	9	59.8	59.8	59.8	19.947	0	254.08	3539900	10	45	AT1G09310.1	AT1G09310.1	114
NaN	NaN	NaN	NaN	NaN	NaN				-1	1	1	1	3.7	3.7	3.7	42.619	0.0039526	6.2899	41171	22	2	AT1G09340.1;AT1G09340.2	AT1G09340.1;AT1G09340.2	115
NaN	17.1214	17.1181	NaN	16.9287	16.8596				-1	3	3	2	10.6	10.6	7.8	46.945	0	43.167	840740	19	11	AT1G09430.1	AT1G09430.1	116
18.454	18.7278	18.6879	18.328	18.3143	18.337				-1	6	6	6	33.5	33.5	33.5	18.709	0	82.61	3718900	8	22	AT1G57860.1;AT1G57660.1;AT1G09690.1;AT1G09590.1	AT1G57860.1;AT1G57660.1;AT1G09690.1;AT1G09590.1	117
15.8441	15.8729	16.0394	16.8108	16.8692	16.7653				-1	11	11	11	18.3	18.3	18.3	123.45	0	138.99	2182100	53	42	AT1G09620.1	AT1G09620.1	118
18.0369	17.9536	18.0247	17.0977	17.3516	17.1457				-1	8	8	8	44.7	44.7	44.7	24.108	0	131.39	4402700	15	45	AT1G09630.1	AT1G09630.1	119
16.9589	17.1508	NaN	17.8693	17.8264	17.8602				-1	11	4	4	35.7	13.5	13.5	46.66	0	61.495	1580400	17	14	AT1G09640.1;AT1G09640.2	AT1G09640.1;AT1G09640.2	120
15.6796	15.7794	15.5688	15.5576	15.3873	15.6315				-1	5	5	5	13.6	13.6	13.6	95.766	0	47.809	863150	48	23	AT1G09770.1	AT1G09770.1	121
17.8454	17.7885	17.9305	19.2037	19.1616	19.1311				-1	31	31	21	73.4	73.4	53.1	60.579	0	323.31	21061000	31	155	AT1G09780.1	AT1G09780.1	122
NaN	NaN	NaN	NaN	NaN	NaN				-1	1	1	1	3	3	3	56.473	0.0011295	6.9163	16900	28	2	AT1G09830.1	AT1G09830.1	123
NaN	NaN	NaN	NaN	NaN	NaN				-1	1	1	1	8.9	8.9	8.9	21.848	0.0007722	7.22	7626.3	11	1	AT1G09920.1	AT1G09920.1	124
NaN	NaN	NaN	NaN	NaN	NaN				-1	1	1	1	9	9	9	18.373	0.00043328	10.397	147220	10	3	AT1G10140.1	AT1G10140.1	125
17.1198	17.3722	17.5594	16.8566	16.9671	16.5774				-1	9	9	9	51.1	51.1	51.1	21.04	0	160.11	3203500	11	59	AT1G10200.1;AT1G10200.2	AT1G10200.1;AT1G10200.2	126
19.2515	19.1175	19.1027	19.1002	19.1578	19.2646				-1	37	37	23	49.6	49.6	32.6	99.165	0	323.31	23373000	56	187	AT1G10290.1	AT1G10290.1	127
NaN	NaN	NaN	16.4112	16.0218	16.1596				-1	4	4	4	13.5	13.5	13.5	38.756	0	65.848	407390	20	9	AT1G10350.1	AT1G10350.1	128
NaN	NaN	NaN	18.0742	18.1054	17.9532				-1	6	3	3	36.3	16.3	16.3	34.934	0	153.07	1280300	17	12	AT1G10430.2;AT1G10430.1	AT1G10430.2;AT1G10430.1	129
NaN	NaN	NaN	NaN	NaN	NaN				-1	1	1	1	2.5	2.5	2.5	64.722	0.00076923	7.1708	60206	32	2	AT1G10510.1	AT1G10510.1	130
NaN	NaN	NaN	NaN	NaN	NaN				-1	2	2	2	7.9	7.9	7.9	65.127	0	34.987	150700	29	6	AT1G10580.1	AT1G10580.1	131
NaN	16.6866	16.745	NaN	16.2555	NaN				-1	2	2	2	24.5	24.5	24.5	15.455	0	15.979	821240	8	9	AT1G10590.1;AT1G10590.2;AT1G10590.3	AT1G10590.1;AT1G10590.2;AT1G10590.3	132
15.6388	15.3668	NaN	NaN	NaN	NaN				-1	13	2	2	85.6	17.1	17.1	20.608	0	96.239	301490	10	8	AT2G47170.3;AT2G47170.2;AT2G47170.1;AT1G10630.2;AT1G10630.1;AT5G14670.3;AT5G14670.2;AT5G14670.1	AT2G47170.3;AT2G47170.2;AT2G47170.1;AT1G10630.2;AT1G10630.1;AT5G14670.3;AT5G14670.2;AT5G14670.1	133
NaN	NaN	NaN	NaN	NaN	NaN				-1	3	2	2	11.1	8.3	8.3	46.678	0	12.7	282850	20	7	AT1G10670.4;AT1G10670.2;AT1G10670.1;AT1G10670.3	AT1G10670.4;AT1G10670.2;AT1G10670.1;AT1G10670.3	134
NaN	NaN	NaN	NaN	NaN	NaN				-1	1	1	1	5.7	5.7	5.7	32.368	0.00040502	7.9565	62516	13	3	AT1G10700.2;AT1G10700.1	AT1G10700.2;AT1G10700.1	135
NaN	NaN	NaN	NaN	NaN	NaN				-1	3	3	3	5	5	5	156.58	0	16.577	719540	69	4	AT1G10760.3;AT1G10760.2;AT1G10760.1	AT1G10760.3;AT1G10760.2;AT1G10760.1	136
NaN	NaN	NaN	NaN	NaN	NaN				-1	1	1	1	3	3	3	72.737	0.0011372	6.9949	32285	30	1	AT1G10850.1	AT1G10850.1	137
NaN	NaN	NaN	NaN	NaN	NaN				-1	1	1	1	1.8	1.8	1.8	68.537	0.0025455	6.4894	283360	29	6	AT1G60860.3;AT1G60860.2;AT1G10870.1;AT1G60860.1;AT1G10870.2	AT1G60860.3;AT1G60860.2;AT1G10870.1;AT1G60860.1;AT1G10870.2	138
NaN	NaN	NaN	NaN	NaN	NaN				-1	1	1	1	3.8	3.8	3.8	28.875	0.0014809	6.714	220960	11	4	AT1G10890.3;AT1G10890.2;AT1G10890.4;AT1G10890.1	AT1G10890.3;AT1G10890.2;AT1G10890.4;AT1G10890.1	139
15.7781	NaN	15.6948	NaN	NaN	NaN				-1	2	2	2	10.5	10.5	10.5	36.561	0	21.018	239750	13	5	AT1G11090.1	AT1G11090.1	140
NaN	NaN	NaN	NaN	NaN	NaN				-1	1	1	1	2.3	2.3	2.3	57.61	0	13.528	1165600	18	5	AT1G11260.1	AT1G11260.1	141
15.014	NaN	NaN	15.7159	15.3179	15.2886				-1	2	2	2	4.1	4.1	4.1	84.049	0	20.568	314570	42	9	AT1G11330.3;AT1G11330.1;AT1G11330.2	AT1G11330.3;AT1G11330.1;AT1G11330.2	142
NaN	NaN	NaN	NaN	NaN	NaN				-1	1	1	1	2.9	2.9	2.9	61.687	0.0025679	6.6049	66254	26	3	AT1G11580.1;AT1G11580.2	AT1G11580.1;AT1G11580.2	143
NaN	NaN	NaN	NaN	NaN	NaN				-1	1	1	1	2.9	2.9	2.9	33.43	0.0053154	6.1361	83404	11	1	AT1G11650.1;AT1G11650.2	AT1G11650.1;AT1G11650.2	144
14.7319	14.8123	14.8225	15.1582	15.2599	15.3977				-1	8	8	8	20.2	20.2	20.2	85.219	0	82.309	671330	41	24	AT1G11660.4;AT1G11660.3;AT1G11660.1;AT1G11660.2	AT1G11660.4;AT1G11660.3;AT1G11660.1;AT1G11660.2	145
NaN	NaN	NaN	NaN	NaN	NaN				-1	1	1	1	2.9	2.9	2.9	55.494	0.00040917	8.1863	39505	23	1	AT1G11680.1	AT1G11680.1	146
NaN	15.8252	NaN	16.4113	16.311	16.453				-1	5	5	5	28.6	28.6	28.6	31.928	0	45.124	871660	12	17	AT1G11840.4;AT1G11840.3;AT1G11840.2;AT1G11840.1;AT1G11840.6;AT1G11840.5	AT1G11840.4;AT1G11840.3;AT1G11840.2;AT1G11840.1;AT1G11840.6	147
18.1123	18.0462	18.2675	18.114	18.1994	18.4517				-1	20	20	20	62.3	62.3	62.3	44.444	0	293.02	10611000	22	131	AT1G11860.1;AT1G11860.2;AT1G11860.3	AT1G11860.1;AT1G11860.2;AT1G11860.3	148
NaN	NaN	NaN	NaN	NaN	NaN				-1	3	3	3	10.3	10.3	10.3	54.613	0	25.26	146530	24	5	AT1G11910.1;AT1G11910.2;AT1G62290.2;AT1G62290.1	AT1G11910.1;AT1G11910.2	149
16.8842	NaN	16.6881	NaN	NaN	NaN				-1	2	2	2	4.8	4.8	4.8	88.279	0	79.342	380640	39	5	AT1G11960.1;AT1G11960.3;AT1G11960.2	AT1G11960.1;AT1G11960.3;AT1G11960.2	150
16.3852	16.4811	16.5122	17.3819	17.2431	17.2127				-1	11	11	11	33.9	33.9	33.9	61.459	0	206.04	2501000	27	42	AT1G12000.1;AT4G04040.1	AT1G12000.1	151
14.3508	NaN	NaN	15.7004	15.6906	15.784				-1	1	1	1	7.5	7.5	7.5	36.531	0	21.346	449350	11	14	AT1G12010.1	AT1G12010.1	152
NaN	NaN	NaN	NaN	NaN	NaN				-1	2	2	2	9.4	9.4	9.4	51.933	0	17.191	87480	26	4	AT1G12140.2;AT1G12140.3;AT1G12140.1	AT1G12140.2;AT1G12140.3;AT1G12140.1	153
NaN	NaN	NaN	NaN	NaN	NaN				-1	1	1	1	4.7	4.7	4.7	43.994	0.00077973	7.3128	144220	20	6	AT1G12230.1;AT1G12230.2	AT1G12230.1;AT1G12230.2	154
NaN	NaN	NaN	NaN	NaN	NaN				-1	2	2	2	7	7	7	64.584	0	13.167	115280	27	4	AT1G12270.1	AT1G12270.1	155
17.1365	17.2344	15.9285	17.558	17.4737	17.6032				-1	8	8	4	70.3	70.3	37.2	16.517	0	195.79	2114700	11	27	AT1G12310.1	AT1G12310.1	156
NaN	14.7841	NaN	14.7969	14.8866	14.9431				-1	4	4	4	11.1	11.1	11.1	75.082	0	34.812	323530	38	14	AT1G12360.1	AT1G12360.1	157
NaN	15.7037	NaN	15.4606	NaN	15.5116				-1	2	2	2	14.5	14.5	14.5	29.099	0	59.509	436670	12	9	AT1G12650.4;AT1G12650.3;AT1G12650.2;AT1G12650.1	AT1G12650.4;AT1G12650.3;AT1G12650.2;AT1G12650.1	158
15.6645	15.5564	15.336	17.9404	17.8108	17.8586				-1	13	13	13	49.3	49.3	49.3	42.619	0	160.45	4895600	26	52	AT1G12840.1	AT1G12840.1	159
16.8574	16.9113	16.9119	NaN	16.7611	17.0237				-1	8	2	2	37.1	17.1	17.1	37.667	0	110.25	918690	19	12	AT1G12900.4;AT1G12900.3;AT1G12900.1;AT1G12900.5;AT1G12900.2	AT1G12900.4;AT1G12900.3;AT1G12900.1;AT1G12900.5;AT1G12900.2	160
16.2957	16.4773	16.4359	16.6153	16.5925	16.5975				-1	5	5	3	26.3	26.3	13.6	48.941	0	39.385	1070300	23	15	AT1G12920.1;AT3G26618.1	AT1G12920.1	161
17.2481	17.403	17.4306	16.7036	16.8879	16.8096				-1	4	4	4	21.2	21.2	21.2	29.667	0	71.524	1743400	13	24	AT1G13060.1;AT3G26340.1;AT1G13060.3;AT1G13060.2	AT1G13060.1;AT3G26340.1;AT1G13060.3;AT1G13060.2	162
NaN	NaN	NaN	NaN	NaN	NaN				-1	1	1	1	4.4	4.4	4.4	44.347	0.0059775	6.0473	24857	23	2	AT1G13080.2;AT1G13080.1	AT1G13080.2;AT1G13080.1	163
14.6707	NaN	14.8644	14.7738	14.8517	14.7583				-1	3	3	3	9.3	9.3	9.3	57.208	0	25.447	349140	29	14	AT1G13110.1;AT1G13090.2;AT1G13100.1;AT5G25140.1;AT5G25130.1;AT3G26210.1	AT1G13110.1;AT1G13090.2	164
NaN	NaN	NaN	NaN	NaN	NaN				-1	1	1	1	2.6	2.6	2.6	61.399	0.00039355	7.4328	43516	17	2	AT1G13190.1	AT1G13190.1	165
20.592	20.8571	20.7846	20.1786	20.1272	19.8488				-1	8	8	8	43.9	43.9	43.9	40.424	0	283.13	15159000	17	48	AT1G13270.1;AT1G13270.2	AT1G13270.1;AT1G13270.2	166
NaN	NaN	15.7796	17.1341	16.7906	16.4406				-1	6	5	5	14.5	12.5	12.5	59.998	0	66.033	1455400	27	27	AT1G13320.2;AT1G13320.3;AT1G13320.1;AT1G13320.4	AT1G13320.2;AT1G13320.3;AT1G13320.1;AT1G13320.4	167
22.175	22.0378	22.2493	22.1547	22.1837	22.2048				-1	27	27	4	76.6	76.6	21.6	36.913	0	323.31	110500000	21	197	AT1G13440.1;AT1G13440.2	AT1G13440.1;AT1G13440.2	168
16.0467	16.0164	16.0685	15.8977	NaN	16.1091				-1	4	4	4	36.2	36.2	36.2	19.809	0	30.177	601120	10	16	AT1G13690.1	AT1G13690.1	169
16.8557	16.2469	15.965	16.9143	17.4151	17.1747				-1	4	4	4	34.8	34.8	34.8	16.163	0	39.48	1463200	9	19	AT1G13930.3;AT1G13930.2;AT1G13930.1	AT1G13930.3;AT1G13930.2;AT1G13930.1	170
NaN	NaN	NaN	NaN	NaN	NaN				-1	2	1	1	31.6	19.6	19.6	17.36	0.00041339	8.4377	41199	10	3	AT1G13950.1	AT1G13950.1	171
17.7065	17.6966	17.7023	17.9131	18.0213	17.912				-1	9	9	9	40.5	40.5	40.5	24.917	0	101.05	4912400	11	49	AT1G14320.1;AT1G66580.1;AT1G26910.2;AT1G26910.1;AT1G14320.2	AT1G14320.1;AT1G66580.1;AT1G26910.2;AT1G26910.1	172
NaN	NaN	NaN	NaN	NaN	NaN				-1	2	2	2	7.9	7.9	7.9	28.285	0	13.824	309260	9	7	AT1G14510.1;AT2G02470.2;AT2G02470.3;AT2G02470.1	AT1G14510.1;AT2G02470.2;AT2G02470.3;AT2G02470.1	173
NaN	NaN	NaN	16.2542	16.3214	16.2313				-1	3	3	3	6	6	6	125.92	0	83.099	632720	56	11	AT1G14610.1	AT1G14610.1	174
NaN	NaN	NaN	NaN	NaN	NaN				-1	1	1	1	3	3	3	68.048	0.0059965	6.087	49400	22	4	AT2G01970.1;AT1G14670.1;AT5G37310.2;AT5G37310.1	AT2G01970.1;AT1G14670.1;AT5G37310.2;AT5G37310.1	175
15.6359	15.7294	15.9076	16.1618	15.9298	16.134				-1	4	4	4	18.7	18.7	18.7	40.745	0	59.516	866400	16	20	AT1G14810.1;AT1G14810.2	AT1G14810.1;AT1G14810.2	176
18.5336	18.2954	18.4597	18.3641	18.4965	18.5882				-1	31	31	25	64.7	64.7	57.5	68.722	0	323.31	15784000	37	151	AT1G14830.1	AT1G14830.1	177
NaN	NaN	NaN	16.3914	16.3798	16.356				-1	14	8	7	28.1	16.2	14.6	67.487	0	117.63	1247300	33	25	AT1G14840.1;AT1G14840.2	AT1G14840.1;AT1G14840.2	178
NaN	NaN	NaN	NaN	NaN	NaN				-1	2	2	2	20.6	20.6	20.6	17.892	0	17.236	74099	8	4	AT1G14950.1	AT1G14950.1	179
NaN	NaN	NaN	NaN	NaN	NaN				-1	1	1	1	11.8	11.8	11.8	17.682	0	14.074	175660	6	6	AT1G14960.1	AT1G14960.1	180
15.5216	15.6094	15.8044	16.1615	15.9776	16.18				-1	4	4	4	10.2	10.2	10.2	95.208	0	82.477	644650	45	16	AT1G15130.1	AT1G15130.1	181
16.2646	16.2708	16.2438	NaN	NaN	NaN				-1	30	11	11	25.9	12.1	12.1	162.57	0	135.89	1313400	71	28	AT1G15210.1;AT2G29940.1	AT1G15210.1	182
17.4952	17.9597	18.1057	17.0364	16.9056	NaN				-1	1	1	1	25	25	25	6.978	0	18.574	1413400	2	11	AT1G15270.1	AT1G15270.1	183
NaN	NaN	NaN	NaN	NaN	NaN				-1	2	1	1	2.4	1.2	1.2	147.95	0.00040733	8.0887	47519	71	3	AT1G15290.2;AT1G15290.1	AT1G15290.2;AT1G15290.1	184
NaN	NaN	NaN	NaN	NaN	NaN				-1	3	1	1	13.8	5.4	5.4	36.344	0.0011424	7.0445	106820	21	5	AT1G15470.1;AT1G15470.2	AT1G15470.1;AT1G15470.2	185
NaN	NaN	NaN	NaN	NaN	NaN				-1	1	1	1	3.7	3.7	3.7	73.145	0	16.459	255270	24	5	AT1G15530.1	AT1G15530.1	186
17.9068	17.9908	17.4745	15.4809	15.4203	15.4868				-1	6	6	6	12.3	12.3	12.3	80.819	0	67.951	2673100	27	30	AT1G15690.1;AT1G15690.2	AT1G15690.1	187
NaN	NaN	NaN	NaN	NaN	NaN				-1	1	1	1	3.6	3.6	3.6	50.258	0.0032409	6.3367	207710	18	5	AT1G15730.1	AT1G15730.1	188
18.3519	18.4665	18.6389	18.4695	18.4909	18.5113				-1	5	5	5	24.8	24.8	24.8	27.522	0	132.14	2794600	12	16	AT1G15820.1	AT1G15820.1	189
15.0811	NaN	NaN	NaN	NaN	15.5609				-1	3	3	3	27.1	27.1	27.1	15.377	0	20.776	370950	9	9	AT1G15930.2;AT1G15930.1;AT2G32060.3;AT2G32060.2;AT2G32060.1	AT1G15930.2;AT1G15930.1	190
16.7913	17.5188	17.2645	16.4587	16.2208	16.0278				-1	6	6	6	29.9	29.9	29.9	26.826	0	91.475	2166200	12	28	AT1G16210.1	AT1G16210.1	191
16.3094	15.9857	15.6684	17.5139	17.4944	17.6081				-1	15	15	14	43	43	39.6	54.051	0	322.83	4502400	24	66	AT1G16350.1	AT1G16350.1	192
NaN	NaN	NaN	NaN	NaN	NaN				-1	1	1	1	10.5	10.5	10.5	29.451	0.00042248	9.2045	50416	14	2	AT1G16460.6;AT1G16460.5;AT1G16460.4;AT1G16460.3;AT1G16460.1;AT1G16460.2	AT1G16460.6;AT1G16460.5;AT1G16460.4;AT1G16460.3;AT1G16460.1;AT1G16460.2	193
NaN	16.4405	16.3909	15.7914	15.9456	NaN				-1	2	2	2	17	17	17	25.733	0	32.535	653400	13	11	AT1G79210.3;AT1G79210.2;AT1G79210.1;AT1G16470.2;AT1G16470.1	AT1G79210.3;AT1G79210.2;AT1G79210.1;AT1G16470.2;AT1G16470.1	194
NaN	NaN	NaN	NaN	NaN	NaN				-1	2	2	2	8.9	8.9	8.9	41.977	0	22.953	179380	19	6	AT1G16610.4;AT1G16610.5;AT1G16610.7;AT1G16610.6;AT1G16610.2;AT1G16610.1;AT1G16610.3	AT1G16610.4;AT1G16610.5;AT1G16610.7;AT1G16610.6;AT1G16610.2;AT1G16610.1;AT1G16610.3	195
NaN	NaN	NaN	NaN	NaN	NaN				-1	1	1	1	7.7	7.7	7.7	25.502	0.0025547	6.538	45643	13	2	AT1G79010.1;AT1G16700.1	AT1G79010.1;AT1G16700.1	196
NaN	NaN	NaN	NaN	NaN	NaN				-1	1	1	1	3.1	3.1	3.1	85.132	0.00039139	7.3635	12869	25	1	AT1G78920.3;AT1G78920.2;AT1G78920.1;AT1G16780.3;AT1G16780.2;AT1G16780.1	AT1G78920.3;AT1G78920.2;AT1G78920.1;AT1G16780.3;AT1G16780.2;AT1G16780.1	197
NaN	NaN	NaN	NaN	NaN	NaN				-1	2	2	2	22.9	22.9	22.9	16.382	0	13.073	80302	6	3	AT1G16810.3;AT1G16810.2;AT1G16810.1	AT1G16810.3;AT1G16810.2;AT1G16810.1	198
NaN	NaN	NaN	NaN	NaN	NaN				-1	1	1	1	31.2	31.2	31.2	5.2899	0.0018457	6.6803	328700	3	1	AT1G16820.4;AT1G16820.3;AT1G16820.2;AT1G16820.1	AT1G16820.4;AT1G16820.3;AT1G16820.2;AT1G16820.1	199
NaN	NaN	NaN	NaN	NaN	NaN				-1	2	2	2	9.1	9.1	9.1	50.582	0	16.814	55608	24	3	AT1G16860.1	AT1G16860.1	200
15.5366	15.304	15.7518	15.5584	15.4304	15.5661				-1	4	4	4	15	15	15	53.783	0	30.259	740390	24	20	AT1G16870.1	AT1G16870.1	201
NaN	19.5328	19.3932	18.5099	18.2298	18.2186				-1	6	5	5	32.9	25.9	25.9	24.02	0	77.72	4727600	12	16	AT1G16920.1;AT1G06400.1	AT1G16920.1	202
18.0481	18.0037	18.1842	17.56	17.4281	17.2534				-1	6	6	6	7.6	7.6	7.6	109.75	0	99.787	3125800	48	32	AT1G17220.1	AT1G17220.1	203
NaN	NaN	15.1402	NaN	15.1784	15.4722				-1	3	3	3	7.6	7.6	7.6	59.82	0	26.205	300460	29	12	AT1G17290.1;AT1G72330.2;AT1G72330.1;AT1G72330.3	AT1G17290.1	204
NaN	NaN	13.8383	14.0509	14.2287	14.0812				-1	4	3	3	4.6	3.3	3.3	172.91	0	25.471	139500	91	10	AT1G17580.1	AT1G17580.1	205
15.0354	NaN	NaN	16.0351	15.9737	15.9805				-1	8	8	1	27.9	27.9	3	56.274	0	91.5	851010	27	23	AT1G17720.1	AT1G17720.1	206
NaN	NaN	NaN	NaN	NaN	NaN				-1	8	1	1	27.8	2.8	2.8	56.175	0.000409	8.186	139860	27	3	AT1G17720.2	AT1G17720.2	207
NaN	14.8783	14.9184	NaN	NaN	NaN				-1	2	2	2	3.2	3.2	3.2	119.18	0	13.936	119510	48	4	AT1G17750.1	AT1G17750.1	208
15.3329	15.0532	15.444	15.1306	15.4086	15.1968				-1	9	8	8	19.6	18.5	18.5	78.412	0	60.351	867250	33	27	AT1G17840.1;AT1G51460.1	AT1G17840.1	209
17.6212	17.7243	17.5409	17.5644	17.347	17.3181				-1	3	3	3	30.3	30.3	30.3	17.946	0	82.499	2473400	7	22	AT1G17880.1	AT1G17880.1	210
NaN	NaN	NaN	NaN	NaN	NaN				-1	1	1	1	6.6	6.6	6.6	35.421	0	10.925	50881	13	1	AT1G17890.3;AT1G17890.2;AT1G17890.1	AT1G17890.3;AT1G17890.2;AT1G17890.1	211
16.4949	16.7673	16.6011	17.1269	NaN	NaN				-1	4	4	4	10.9	10.9	10.9	59.242	0	31.961	658630	28	12	AT1G18070.1;AT1G18070.2;AT1G18070.3	AT1G18070.1;AT1G18070.2;AT1G18070.3	212
17.4738	17.4545	17.6674	17.5692	17.7389	17.856				-1	18	18	18	56.9	56.9	56.9	35.747	0	323.31	5621500	20	74	AT1G18080.1	AT1G18080.1	213
NaN	NaN	NaN	NaN	NaN	NaN				-1	1	1	1	3.9	3.9	3.9	66.231	0	28.88	34928	34	3	AT1G18150.3;AT1G18150.2;AT1G18150.1	AT1G18150.3;AT1G18150.2;AT1G18150.1	214
15.1622	15.171	15.0309	14.724	NaN	14.9409				-1	5	5	4	48.2	48.2	33.5	18.35	0	64.851	436440	13	15	AT1G18210.2;AT1G18210.1	AT1G18210.2;AT1G18210.1	215
15.4055	15.8281	15.6453	15.8058	15.7627	15.9175				-1	8	8	8	10.8	10.8	10.8	140.72	0	65.17	528590	63	19	AT1G18270.4;AT1G18270.1;AT1G18270.2;AT1G18270.3	AT1G18270.4;AT1G18270.1;AT1G18270.2;AT1G18270.3	216
NaN	NaN	NaN	NaN	NaN	NaN				-1	2	2	2	8.8	8.8	8.8	48.936	0	17.363	203520	25	5	AT1G18450.1	AT1G18450.1	217
16.7702	16.6544	16.6403	16.4974	16.4103	16.5285				-1	6	6	2	15.2	15.2	3.8	68.675	0	70.266	1542700	35	28	AT1G18500.1;AT1G74040.3;AT1G74040.2	AT1G18500.1;AT1G74040.3;AT1G74040.2	218
17.0459	17.0077	17.0908	17.4301	17.3832	17.5391				-1	12	12	5	45.5	45.5	29.6	26.152	0	183.45	4620800	12	61	AT1G18540.1	AT1G18540.1	219
NaN	NaN	NaN	NaN	NaN	NaN				-1	1	1	1	12.3	12.3	12.3	15.96	0.0025418	6.4717	37354	9	2	AT1G18630.1	AT1G18630.1	220
20.6029	20.4344	20.5758	17.8647	17.9782	17.7644				-1	20	20	20	37	37	37	83.017	0	323.31	26774000	33	103	AT1G19110.1	AT1G19110.1	221
16.6506	16.4888	16.7203	NaN	16.6081	16.4232				-1	5	5	5	18.7	18.7	18.7	48.251	0	52.022	903850	22	17	AT1G19360.2;AT1G19360.1	AT1G19360.2;AT1G19360.1	222
NaN	NaN	NaN	NaN	NaN	NaN				-1	2	2	2	5.1	5.1	5.1	82.661	0	11.325	21252	37	2	AT1G19430.1;AT1G19430.3;AT1G19430.2	AT1G19430.1;AT1G19430.3;AT1G19430.2	223
NaN	NaN	NaN	NaN	NaN	NaN				-1	4	4	4	9.2	9.2	9.2	82.535	0	22.968	100710	37	5	AT1G19520.1;AT1G19520.2	AT1G19520.1	224
18.7384	18.6057	18.7895	18.9276	18.9883	19.213				-1	8	8	8	56.3	56.3	56.3	23.641	0	291.25	6393800	15	50	AT1G19570.1;AT1G19550.1	AT1G19570.1	225
NaN	NaN	NaN	14.8921	14.832	14.9897				-1	6	6	5	9.5	9.5	8.1	109.81	0	59.512	336150	53	15	AT1G19835.6;AT1G19835.5;AT1G19835.4;AT1G19835.3;AT1G19835.2;AT1G19835.1	AT1G19835.6;AT1G19835.5;AT1G19835.4;AT1G19835.3;AT1G19835.2;AT1G19835.1	226
NaN	16.1993	NaN	15.7706	15.7328	15.6				-1	7	7	7	13.5	13.5	13.5	86.881	0	121.53	709040	43	20	AT1G19870.1;AT1G19870.2	AT1G19870.1;AT1G19870.2	227
15.9967	16.0009	16.3473	16.4787	16.5904	16.6298				-1	16	5	4	47.2	17.8	12.2	50.342	0	70.387	1248400	21	20	AT1G20010.1;CON__ENSEMBL:ENSBTAP00000025008	AT1G20010.1	228
NaN	NaN	NaN	NaN	NaN	NaN				-1	1	1	1	4.9	4.9	4.9	25.146	0.0007776	7.288	18215	5	1	AT1G20050.1	AT1G20050.1	229
NaN	NaN	NaN	NaN	NaN	NaN				-1	2	2	1	14.4	14.4	9.6	16.169	0	11.726	52223	6	2	AT4G35020.4;AT4G35020.3;AT1G20090.1;AT1G75840.1;AT4G35020.1;AT4G35020.5;AT4G35020.2;AT5G62880.1;AT3G48040.1;AT5G45970.1;AT4G35950.1;AT2G17800.2;AT2G17800.1;AT3G51300.1;AT5G62880.2;AT3G48040.2;AT3G51290.2	AT4G35020.4;AT4G35020.3;AT1G20090.1;AT1G75840.1;AT4G35020.1;AT4G35020.5;AT4G35020.2;AT5G62880.1;AT3G48040.1;AT5G45970.1;AT4G35950.1;AT2G17800.2;AT2G17800.1;AT3G51300.1;AT5G62880.2;AT3G48040.2;AT3G51290.2	230
NaN	NaN	NaN	NaN	NaN	NaN				-1	3	3	3	10.5	10.5	10.5	65.395	0	18.685	97532	24	6	AT1G20110.1	AT1G20110.1	231
18.512	18.3874	18.606	16.9355	16.9392	16.7989				-1	13	13	5	28.7	28.7	13.1	55.582	0	222.43	4906500	33	47	AT1G20200.1	AT1G20200.1	232
18.2465	18.1579	18.3359	20.3492	20.3636	20.3357				-1	29	29	1	75.6	75.6	6.8	54.311	0	323.31	42948000	24	168	AT1G20260.1	AT1G20260.1	233
16.335	16.0465	16.5406	16.9025	16.9604	16.7628				-1	6	6	6	28.8	28.8	28.8	40.45	0	57.72	1863100	20	28	AT1G20330.1;AT1G76090.1	AT1G20330.1	234
15.2562	15.2063	NaN	15.5614	NaN	15.9801				-1	2	2	2	14.3	14.3	14.3	29.896	0	29.425	423390	13	10	AT1G20440.1	AT1G20440.1	235
NaN	NaN	NaN	15.5599	NaN	15.6834				-1	2	2	2	10.4	10.4	10.4	29.443	0	15.083	164370	15	5	AT1G20450.2;AT1G20450.1	AT1G20450.2;AT1G20450.1	236
NaN	NaN	NaN	NaN	NaN	NaN				-1	1	1	1	6.6	6.6	6.6	39.054	0.0079778	5.9438	14190	15	1	AT1G76260.1;AT1G20540.1	AT1G76260.1;AT1G20540.1	237
NaN	NaN	NaN	NaN	NaN	NaN				-1	1	1	1	6.9	6.9	6.9	14.237	0.0049698	6.1544	160100	8	5	AT1G20580.1	AT1G20580.1	238
18.3508	18.4054	18.3284	18.1805	18.1187	18.553				-1	9	9	7	27.6	27.6	20.8	55.967	0	210.84	8456800	25	51	AT1G20620.5;AT1G20620.1;AT1G20620.6;AT1G20620.2;AT1G20620.4;AT1G20620.7;AT1G20630.1	AT1G20620.5;AT1G20620.1;AT1G20620.6;AT1G20620.2;AT1G20620.4;AT1G20620.7	239
NaN	20.0169	19.7212	18.9689	19.0092	18.2353				-1	1	1	1	13.3	13.3	13.3	11.257	0	44.417	4786800	4	11	AT1G20696.3;AT1G20696.4;AT1G20696.5;AT1G20696.1;AT1G20693.2;AT1G20693.3;AT1G20693.1;AT1G20696.2	AT1G20696.3;AT1G20696.4;AT1G20696.5;AT1G20696.1;AT1G20693.2;AT1G20693.3;AT1G20693.1;AT1G20696.2	240
NaN	NaN	NaN	15.64	15.3085	NaN				-1	6	6	6	7.2	7.2	7.2	109.82	0	65.681	377350	54	9	AT1G20760.1	AT1G20760.1	241
NaN	NaN	NaN	NaN	NaN	NaN				-1	1	1	1	2.5	2.5	2.5	88.379	0.0083131	5.9299	4978.1	46	1	AT1G20780.3;AT1G20780.2;AT1G20780.1	AT1G20780.3;AT1G20780.2;AT1G20780.1	242
15.9608	NaN	15.7418	NaN	NaN	NaN				-1	3	3	3	10.8	10.8	10.8	79.484	0	23.839	244100	26	6	AT1G20840.2;AT1G20840.1	AT1G20840.2;AT1G20840.1	243
17.5699	17.7261	17.6419	17.3243	17.3101	17.2207				-1	26	26	26	31.5	31.5	31.5	133.03	0	323.31	7024100	57	113	AT1G20920.7;AT1G20920.6;AT1G20920.5;AT1G20920.4;AT1G20920.3;AT1G20920.1;AT1G20920.2;AT3G09620.1;AT3G09620.2	AT1G20920.7;AT1G20920.6;AT1G20920.5;AT1G20920.4;AT1G20920.3;AT1G20920.1;AT1G20920.2	244
14.9073	15.027	15.2352	NaN	NaN	NaN				-1	4	4	2	10.1	10.1	5.5	67.118	0	51.855	482930	35	12	AT1G20950.1	AT1G20950.1	245
16.3241	16.2784	16.5068	16.1504	16.3049	16.3177				-1	12	12	12	11.3	11.3	11.3	247.1	0	158.38	1923800	114	53	AT1G20960.2;AT1G20960.1	AT1G20960.2;AT1G20960.1	246
16.6026	16.5316	16.6474	15.6977	15.8328	15.6965				-1	13	8	8	18	10.8	10.8	122.67	0	95.332	1614000	60	45	AT1G21170.1;AT1G21170.2	AT1G21170.1;AT1G21170.2	247
15.9808	NaN	16.1699	NaN	NaN	NaN				-1	2	2	2	5.7	5.7	5.7	81.643	0	22.747	319200	33	9	AT1G21270.1;AT1G21230.1	AT1G21270.1;AT1G21230.1	248
NaN	NaN	NaN	NaN	NaN	NaN				-1	1	1	1	4.2	4.2	4.2	55.791	0.00041999	8.9832	50938	24	3	AT1G21380.1	AT1G21380.1	249
NaN	NaN	NaN	16.1895	16.1759	16.2629				-1	9	9	9	16.6	16.6	16.6	129.45	0	89.543	995000	62	22	AT1G21630.3;AT1G21630.1;AT1G21630.4;AT1G21630.2	AT1G21630.3;AT1G21630.1;AT1G21630.4;AT1G21630.2	250
NaN	NaN	NaN	NaN	NaN	NaN				-1	1	1	1	5.5	5.5	5.5	36.195	0	25.951	231080	17	6	AT1G21690.2;AT1G21690.1;AT1G21690.3	AT1G21690.2;AT1G21690.1;AT1G21690.3	251
NaN	NaN	NaN	NaN	NaN	NaN				-1	1	1	1	2.4	2.4	2.4	98.455	0	19.779	239310	51	6	AT1G21730.1	AT1G21730.1	252
15.7592	15.8252	15.168	15.5564	15.2923	15.4852				-1	6	6	6	17	17	17	54.158	0	46.556	690360	33	21	AT1G21750.2;AT1G21750.1	AT1G21750.2;AT1G21750.1	253
NaN	NaN	NaN	NaN	NaN	NaN				-1	1	1	1	3.1	3.1	3.1	37.678	0.0014804	6.7112	39946	21	1	AT1G21780.2;AT1G21780.1	AT1G21780.2;AT1G21780.1	254
16.1412	15.9834	15.8219	16.4114	16.4963	16.4001				-1	7	7	7	7.1	7.1	7.1	228.95	0	76.1	1059100	119	27	AT1G22060.2;AT1G22060.1	AT1G22060.2;AT1G22060.1	255
NaN	NaN	NaN	NaN	NaN	NaN				-1	2	2	2	37.1	37.1	37.1	13.961	0	15.942	255360	9	6	AT1G22270.1	AT1G22270.1	256
NaN	NaN	NaN	NaN	NaN	NaN				-1	1	1	1	9.5	9.5	9.5	21.731	0	13.496	63861	11	2	AT1G22280.2;AT1G22280.1;AT1G22280.3	AT1G22280.2;AT1G22280.1;AT1G22280.3	257
17.758	17.5394	17.6271	18.3147	18.3307	18.3272				-1	17	16	16	64.2	60.2	60.2	28.915	0	323.31	7069600	17	67	AT1G22300.1;AT1G22300.2;AT1G22300.3;AT1G34760.2;AT1G34760.1;AT1G78220.1;AT1G26480.1	AT1G22300.1;AT1G22300.2;AT1G22300.3	258
15.8401	15.9547	16.0601	16.2499	NaN	16.3381				-1	1	1	1	4.5	4.5	4.5	52.939	0	11.185	554260	23	11	AT1G22360.2;AT1G22360.1	AT1G22360.2;AT1G22360.1	259
16.0777	16.1806	16.2325	15.7778	15.8686	15.7133				-1	8	8	7	31.7	31.7	30	58.326	0	151.13	1228800	26	35	AT1G22410.1;AT4G33510.2;AT4G33510.1	AT1G22410.1	260
18.2341	17.8621	18.0295	16.7521	16.7081	16.7229				-1	18	18	18	39.4	39.4	39.4	76.007	0	323.31	5413300	45	78	AT1G22530.1;AT1G22530.2	AT1G22530.1;AT1G22530.2	261
NaN	NaN	NaN	15.0104	NaN	15.057				-1	2	2	2	5.9	5.9	5.9	77.243	0	16.659	141410	35	5	AT1G22730.1	AT1G22730.1	262
21.7023	21.7991	21.9525	21.155	21.7303	21.609				-1	7	7	7	51.3	51.3	51.3	17.545	0	265.46	41419000	8	39	AT4G09800.1;AT1G34030.1;AT1G22780.1	AT4G09800.1;AT1G34030.1;AT1G22780.1	263
NaN	NaN	NaN	NaN	NaN	NaN				-1	1	1	1	2.2	2.2	2.2	76.102	0.00042717	9.8788	14699	36	2	AT1G22870.2;AT1G22870.3;AT1G22870.4;AT1G22870.1	AT1G22870.2;AT1G22870.3;AT1G22870.4;AT1G22870.1	264
NaN	NaN	NaN	NaN	NaN	NaN				-1	1	1	1	4.6	4.6	4.6	58.049	0.00039324	7.4309	17281	26	3	AT1G23080.2;AT1G23080.4;AT1G23080.3;AT1G23080.1	AT1G23080.2;AT1G23080.4;AT1G23080.3;AT1G23080.1	265
15.7594	15.1973	15.7112	16.0303	16.441	16.3008				-1	5	5	2	14.1	14.1	5	63.17	0	86.72	787280	36	20	AT1G23190.1	AT1G23190.1	266
NaN	NaN	NaN	NaN	NaN	NaN				-1	1	1	1	5.6	5.6	5.6	35.759	0.0004008	7.7877	77222	15	2	AT1G23280.1	AT1G23280.1	267
19.1699	18.8566	19.1814	19.1751	19.1924	19.0091				-1	10	1	1	45.9	12.3	12.3	16.292	0	70.607	4137500	8	12	AT1G23290.1	AT1G23290.1	268
NaN	NaN	NaN	NaN	NaN	NaN				-1	4	4	4	15	15	15	53.301	0	24.809	162670	27	5	AT1G23310.1;AT1G23310.2;AT1G70580.4;AT1G70580.3;AT1G70580.2;AT1G70580.1	AT1G23310.1;AT1G23310.2;AT1G70580.4;AT1G70580.3;AT1G70580.2;AT1G70580.1	269
22.4101	22.2474	22.4342	21.9052	21.9559	21.9158				-1	14	14	3	86.2	86.2	17.7	20.592	0	323.31	50366000	10	94	AT1G70490.7;AT1G70490.6;AT1G70490.5;AT1G70490.4;AT1G70490.3;AT1G70490.2;AT1G70490.1;AT1G23490.1	AT1G70490.7;AT1G70490.6;AT1G70490.5;AT1G70490.4;AT1G70490.3;AT1G70490.2;AT1G70490.1;AT1G23490.1	270
NaN	NaN	NaN	15.0816	14.6109	14.9704				-1	6	6	6	30.2	30.2	30.2	36.553	0	34.241	322930	16	11	AT1G23820.1;AT1G23820.2	AT1G23820.1;AT1G23820.2	271
NaN	NaN	NaN	NaN	NaN	NaN				-1	1	1	1	10.4	10.4	10.4	18.87	0	93.012	980070	8	6	AT1G23860.3;AT1G23860.4;AT1G23860.2;AT1G23860.1	AT1G23860.3;AT1G23860.4;AT1G23860.2;AT1G23860.1	272
16.4451	16.4472	16.5525	16.4034	16.4637	16.6138				-1	6	6	6	52.9	52.9	52.9	17.054	0	48.119	1634300	12	25	AT1G24020.2;AT1G24020.1	AT1G24020.2;AT1G24020.1	273
NaN	NaN	NaN	NaN	NaN	NaN				-1	1	1	1	9.6	9.6	9.6	20.491	0	18.427	136090	10	6	AT1G24050.1	AT1G24050.1	274
15.3236	NaN	15.4572	NaN	NaN	NaN				-1	5	5	5	19.5	19.5	19.5	49.304	0	33.576	236860	20	8	AT1G24120.1	AT1G24120.1	275
21.2266	21.2254	21.399	20.5285	20.4963	20.7656				-1	29	29	22	57.8	57.8	48.1	43.358	0	323.31	74551000	20	202	AT1G24180.1	AT1G24180.1	276
NaN	NaN	NaN	NaN	NaN	NaN				-1	8	2	2	17.5	6.3	6.3	67.358	0	10.782	271670	34	2	AT1G24280.1;AT5G35790.1	AT1G24280.1	277
17.0803	16.9808	17.0959	17.1225	17.2605	17.1641				-1	12	12	12	35.5	35.5	35.5	59.384	0	148.77	3510600	30	54	AT1G24510.1;AT1G24510.2;AT1G24510.3;AT1G67760.1	AT1G24510.1;AT1G24510.2;AT1G24510.3	278
NaN	NaN	NaN	NaN	NaN	NaN				-1	1	1	1	1.1	1.1	1.1	184.34	0	18.505	308310	75	6	AT1G24706.9;AT1G24706.8;AT1G24706.3;AT1G24706.6;AT1G24706.5;AT1G24706.4;AT1G24706.1;AT1G24706.7;AT1G24706.2	AT1G24706.9;AT1G24706.8;AT1G24706.3;AT1G24706.6;AT1G24706.5;AT1G24706.4;AT1G24706.1;AT1G24706.7;AT1G24706.2	279
NaN	NaN	NaN	17.9004	17.8076	17.8078				-1	24	7	3	38.6	11.7	4.9	70.206	0	130.52	2864200	29	20	AT1G24764.1;AT1G24764.3	AT1G24764.1;AT1G24764.3	280
NaN	NaN	NaN	NaN	NaN	NaN				-1	21	1	1	43.9	2.5	2.5	53.285	0.0011364	6.9806	32081	25	1	AT1G24764.2	AT1G24764.2	281
18.8717	19.2171	19.2563	18.4896	18.3464	17.9981				-1	5	5	5	34.5	34.5	34.5	27.242	0	168.33	5565300	13	33	AT1G25260.1	AT1G25260.1	282
NaN	NaN	NaN	NaN	NaN	NaN				-1	1	1	1	2.1	2.1	2.1	91.246	0.00039557	7.5648	86329	43	3	AT1G25350.1;AT1G25350.2	AT1G25350.1;AT1G25350.2	283
NaN	NaN	NaN	NaN	NaN	NaN				-1	1	1	1	4.5	4.5	4.5	31.874	0.0049929	6.1855	248390	16	4	AT1G25400.2;AT1G25400.1	AT1G25400.2;AT1G25400.1	284
16.161	15.3284	16.1247	20.6932	20.8676	20.4418				-1	19	19	17	41.7	41.7	38.1	65.493	0	323.31	19891000	32	91	AT1G25490.1	AT1G25490.1	285
20.3832	20.9121	20.4286	19.8205	19.7291	19.4704				-1	6	6	6	53.5	53.5	53.5	14.857	0	270.63	27619000	8	70	AT1G26550.1	AT1G26550.1	286
19.8118	20.0136	19.8145	19.4053	19.5256	19.3893				-1	8	8	7	78	78	66	17.14	0	323.31	16563000	10	68	AT1G26630.1;AT1G26630.2	AT1G26630.1;AT1G26630.2	287
NaN	NaN	NaN	NaN	NaN	NaN				-1	1	1	1	2.5	2.5	2.5	85.609	0.0063114	6.0186	26939	41	2	AT1G69670.2;AT1G69670.1;AT1G26830.1	AT1G69670.2;AT1G69670.1;AT1G26830.1	288
NaN	NaN	NaN	NaN	NaN	NaN				-1	3	3	3	7.3	7.3	7.3	69.622	0	19.926	144210	36	7	AT1G26850.1;AT1G26850.2;AT1G26850.3	AT1G26850.1;AT1G26850.2	289
NaN	NaN	NaN	NaN	NaN	NaN				-1	1	1	1	14.6	14.6	14.6	10.973	0.0004	7.7741	503830	3	4	AT1G26880.2;AT1G26880.1	AT1G26880.2;AT1G26880.1	290
16.0961	16.2865	16.3656	16.618	16.713	16.6625				-1	8	8	8	57.5	57.5	57.5	35.079	0	90.004	1217300	16	32	AT1G27020.1	AT1G27020.1	291
NaN	NaN	NaN	NaN	NaN	NaN				-1	1	1	1	11.7	11.7	11.7	22.453	0.00077791	7.2897	20951	11	2	AT1G27050.1	AT1G27050.1	292
NaN	NaN	NaN	NaN	NaN	NaN				-1	2	2	2	7.6	7.6	7.6	46.018	0	14.46	78446	23	3	AT1G27090.1	AT1G27090.1	293
18.0871	18.0294	18.0308	16.3167	16.6048	16.5565				-1	10	10	10	27.1	27.1	27.1	65.423	0	220.67	2373900	27	38	AT1G27190.1;AT1G69990.1	AT1G27190.1	294
NaN	15.5533	NaN	15.643	NaN	15.8942				-1	2	2	2	35.2	35.2	35.2	13.527	0	25.936	405020	6	9	AT1G27310.1	AT1G27310.1	295
15.2575	15.7855	NaN	15.3109	NaN	15.2202				-1	2	2	2	18.1	18.1	18.1	23.17	0	26.241	419100	13	11	AT1G27390.1	AT1G27390.1	296
20.3391	20.3781	20.1694	19.8839	20.0958	19.833				-1	9	9	2	47.7	47.7	6.8	19.897	0	258.74	16061000	10	65	AT1G27400.1	AT1G27400.1	297
NaN	NaN	NaN	NaN	NaN	NaN				-1	1	1	1	21	21	21	8.764	0	19.035	151490	5	5	AT1G27435.1	AT1G27435.1	298
NaN	NaN	NaN	NaN	NaN	NaN				-1	2	2	2	5.2	5.2	5.2	71.184	0	30.789	126430	33	4	AT1G27500.1;AT1G27500.2	AT1G27500.1;AT1G27500.2	299
19.2927	19.5604	19.4275	19.0724	19.0622	18.894				-1	7	7	3	36.8	36.8	23.3	34.572	0	248.84	9860400	11	40	AT1G27650.1;AT1G27650.2	AT1G27650.1;AT1G27650.2	300
17.1314	17.1531	17.2456	17.1925	17.3027	17.4791				-1	3	3	3	44.4	44.4	44.4	14.002	0	73.328	2439100	6	25	AT1G27970.1;AT1G27970.2	AT1G27970.1;AT1G27970.2	301
16.0552	16.8627	16.3308	16.0949	16.0825	15.8951				-1	5	5	5	13.1	13.1	13.1	88.637	0	58.684	1271700	31	28	AT1G28060.3;AT1G28060.2;AT1G28060.1	AT1G28060.3;AT1G28060.2;AT1G28060.1	302
NaN	NaN	NaN	NaN	NaN	NaN				-1	1	1	1	6.9	6.9	6.9	34.434	0	19.494	187650	16	6	AT1G28120.1	AT1G28120.1	303
NaN	NaN	NaN	NaN	NaN	NaN				-1	2	2	2	13.1	13.1	13.1	27.721	0	19.404	94659	16	3	AT1G28490.1;AT1G28490.3;AT1G28490.2	AT1G28490.1;AT1G28490.3;AT1G28490.2	304
NaN	NaN	NaN	NaN	NaN	NaN				-1	1	1	1	5.1	5.1	5.1	49.679	0	15.598	77259	17	3	AT1G28680.1	AT1G28680.1	305
18.52	18.3931	18.4996	17.0676	17.2043	16.9907				-1	11	11	11	32.7	32.7	32.7	46.749	0	118.35	4430000	23	47	AT1G29150.2;AT1G29150.1	AT1G29150.2;AT1G29150.1	306
NaN	NaN	NaN	NaN	NaN	NaN				-1	2	2	2	8.8	8.8	8.8	39.004	0	14.412	59611	15	4	AT1G29220.1;AT1G29220.2	AT1G29220.1;AT1G29220.2	307
NaN	NaN	NaN	15.5951	15.5688	15.6737				-1	3	3	3	43.8	43.8	43.8	14.574	0	45.128	372060	9	10	AT1G29250.1	AT1G29250.1	308
NaN	NaN	NaN	NaN	NaN	NaN				-1	1	1	1	3.8	3.8	3.8	52.27	0.00042553	9.6527	79191	20	4	AT1G29320.1;AT1G29320.2	AT1G29320.1;AT1G29320.2	309
16.0599	16.7353	16.1432	NaN	15.595	15.7134				-1	3	3	3	5.3	5.3	5.3	90.887	0	37.044	631590	22	14	AT1G29370.1;AT1G29350.1	AT1G29370.1;AT1G29350.1	310
NaN	NaN	NaN	NaN	NaN	NaN				-1	1	1	1	3.7	3.7	3.7	62.222	0.00039888	7.6937	165380	29	5	AT1G29690.1	AT1G29690.1	311
NaN	NaN	NaN	NaN	NaN	NaN				-1	1	1	1	4.2	4.2	4.2	41.955	0.001139	7.0163	26801	20	2	AT1G29790.2;AT1G29790.1	AT1G29790.2;AT1G29790.1	312
15.3725	15.122	15.4512	18.4287	18.4348	18.4005				-1	20	20	20	37.7	37.7	37.7	81.943	0	230.69	5690900	43	64	AT1G29880.1	AT1G29880.1	313
NaN	NaN	NaN	14.413	NaN	14.6661				-1	2	2	2	3.1	3.1	3.1	129.96	0	17.631	180710	63	8	AT1G29900.1	AT1G29900.1	314
NaN	NaN	NaN	NaN	NaN	NaN				-1	7	2	2	30	14.6	14.6	28.241	0	95.045	1498000	8	7	AT1G29930.1;AT1G29920.1;AT1G29910.1	AT1G29930.1;AT1G29920.1;AT1G29910.1	315
NaN	NaN	NaN	NaN	NaN	NaN				-1	4	4	4	3.1	3.1	3.1	132.38	0	24.016	137450	56	7	AT1G29940.1	AT1G29940.1	316
16.2756	16.1978	16.241	17.6616	17.3174	17.6174				-1	6	6	4	31.2	31.2	27.7	25.132	0	48.11	2116200	11	21	AT1G30230.1;AT1G30230.2	AT1G30230.1;AT1G30230.2	317
16.8507	17.0233	16.81	15.824	16.1235	15.9836				-1	6	6	6	11.9	11.9	11.9	81.934	0	109.2	1373900	40	20	AT1G30360.1	AT1G30360.1	318
NaN	NaN	NaN	NaN	NaN	NaN				-1	1	1	1	7.7	7.7	7.7	13.206	0.0059838	6.0528	359650	5	3	AT1G30380.1	AT1G30380.1	319
15.7737	15.1368	15.7546	14.8878	NaN	14.8912				-1	4	3	3	4.8	3.9	3.9	181.92	0	25.724	469040	76	13	AT1G30400.2;AT1G30400.1	AT1G30400.2;AT1G30400.1	320
17.1653	17.1153	17.2593	16.9372	17.0295	16.9223				-1	11	11	11	31	31	31	73.409	0	133.7	3496400	29	49	AT1G30440.1	AT1G30440.1	321
15.8745	NaN	NaN	16.3787	16.4586	16.4366				-1	7	7	7	18.6	18.6	18.6	84.901	0	95.726	1056100	41	21	AT1G30470.3;AT1G30470.2;AT1G30470.1	AT1G30470.3;AT1G30470.2;AT1G30470.1	322
NaN	NaN	NaN	14.8613	14.4559	14.2908				-1	5	4	4	22.3	18.3	18.3	50.094	0	26.886	176260	22	8	AT1G30530.1	AT1G30530.1	323
18.4349	18.4826	18.4734	18.7602	18.709	18.7803				-1	13	13	13	45.9	45.9	45.9	44.471	0	167.74	7210800	25	68	AT1G30580.1	AT1G30580.1	324
16.9564	16.9336	17.0437	17.8064	17.9052	17.7037				-1	5	5	5	31.5	31.5	31.5	32.602	0	103.29	2049800	15	21	AT1G30630.1;AT2G34840.2;AT2G34840.1	AT1G30630.1	325
NaN	NaN	NaN	NaN	NaN	NaN				-1	1	1	1	2	2	2	80.402	0.00077399	7.2445	53844	37	3	AT1G30680.1	AT1G30680.1	326
19.2792	19.2174	19.2273	17.219	17.2349	17.3529				-1	7	7	7	18.5	18.5	18.5	61.189	0	145.81	8492500	28	35	AT1G30690.2;AT1G30690.1	AT1G30690.2;AT1G30690.1	327
NaN	NaN	NaN	16.1737	16.0071	16.1176				-1	3	3	3	12	12	12	42.443	0	24.197	493070	21	11	AT1G31070.1;AT1G31070.2;AT2G35020.1	AT1G31070.1;AT1G31070.2	328
NaN	14.6074	14.2611	NaN	NaN	NaN				-1	2	2	2	8.9	8.9	8.9	40.445	0	42.016	146730	18	7	AT1G31190.1	AT1G31190.1	329
NaN	NaN	15.4923	15.3038	NaN	15.371				-1	4	4	3	8.2	8.2	6.1	99.403	0	49.627	423680	54	14	AT1G31230.1	AT1G31230.1	330
NaN	NaN	NaN	NaN	NaN	NaN				-1	1	1	1	8.1	8.1	8.1	24.173	0	25.45	3441400	12	6	AT1G31330.1	AT1G31330.1	331
15.725	15.4332	NaN	15.6128	NaN	15.6258				-1	6	6	6	21.9	21.9	21.9	49.258	0	49.386	540700	25	14	AT1G31440.1	AT1G31440.1	332
NaN	NaN	NaN	NaN	NaN	NaN				-1	1	1	1	1.8	1.8	1.8	103.73	0.00040048	7.7797	87510	47	3	AT1G31730.1	AT1G31730.1	333
NaN	NaN	NaN	NaN	15.4114	15.5229				-1	3	3	3	9.1	9.1	9.1	75.792	0	38.777	268380	36	8	AT1G31780.1	AT1G31780.1	334
NaN	NaN	NaN	NaN	NaN	NaN				-1	1	1	1	22.8	22.8	22.8	10.386	0.0049875	6.1749	39249	6	2	AT1G31812.1	AT1G31812.1	335
NaN	NaN	NaN	NaN	NaN	NaN				-1	2	2	2	12.1	12.1	12.1	33.926	0	12.966	224660	16	5	AT1G31817.1	AT1G31817.1	336
14.6674	NaN	NaN	NaN	14.9833	NaN				-1	2	2	2	8	8	8	49.24	0	14.748	126460	19	6	AT1G31910.2;AT1G31910.1	AT1G31910.2;AT1G31910.1	337
17.6878	18.0681	17.971	16.8978	17.0277	16.9189				-1	9	9	9	23.5	23.5	23.5	59.603	0	113.46	2800100	31	30	AT1G31970.1	AT1G31970.1	338
16.7146	16.5154	16.3583	NaN	NaN	NaN				-1	3	3	3	19.7	19.7	19.7	30.06	0	69.458	491150	9	9	AT1G32050.1	AT1G32050.1	339
18.0563	17.9599	18.0961	NaN	NaN	NaN				-1	8	8	8	14.1	14.1	14.1	93.132	0	67.161	2623800	40	22	AT1G32090.1	AT1G32090.1	340
NaN	NaN	NaN	NaN	NaN	NaN				-1	1	1	1	8.4	8.4	8.4	31.978	0.000408	8.1228	133290	13	5	AT1G32220.1	AT1G32220.1	341
NaN	NaN	NaN	NaN	NaN	NaN				-1	1	1	1	18	18	18	12.794	0	11.086	306450	5	7	AT1G32370.1;AT1G32370.4;AT1G32370.3;AT1G32370.2	AT1G32370.1;AT1G32370.4;AT1G32370.3;AT1G32370.2	342
NaN	NaN	NaN	NaN	NaN	NaN				-1	2	2	2	12.1	12.1	12.1	31.555	0	47.373	143620	13	5	AT1G32400.3;AT1G32400.2;AT1G32400.1	AT1G32400.3;AT1G32400.2;AT1G32400.1	343
14.9252	14.8316	14.9699	NaN	NaN	15.2209				-1	2	2	2	20	20	20	17.947	0	27.945	292930	10	10	AT2G35370.1;AT1G32470.1	AT2G35370.1;AT1G32470.1	344
15.0777	15.2235	NaN	NaN	14.6204	NaN				-1	2	2	2	4.3	4.3	4.3	117.58	0	14.416	228200	61	8	AT1G32490.2;AT1G32490.1	AT1G32490.2;AT1G32490.1	345
NaN	NaN	NaN	NaN	NaN	NaN				-1	1	1	1	2.5	2.5	2.5	52.824	0.00043159	10.228	315840	21	5	AT1G32500.1	AT1G32500.1	346
16.8374	NaN	16.6661	NaN	16.4971	NaN				-1	3	3	3	21.2	21.2	21.2	23.148	0	21.503	742880	14	10	AT1G32990.1	AT1G32990.1	347
NaN	NaN	NaN	NaN	NaN	NaN				-1	1	1	1	6.2	6.2	6.2	22.78	0.0032444	6.349	75473	10	2	AT1G33040.1	AT1G33040.1	348
20.2256	20.1432	20.2622	19.8221	19.9155	19.7438				-1	18	18	14	69.1	69.1	59.3	22.017	0	323.31	31655000	10	108	AT1G33140.1;AT1G33120.1	AT1G33140.1;AT1G33120.1	349
NaN	NaN	NaN	NaN	NaN	NaN				-1	2	2	2	10.1	10.1	10.1	51.741	0	15.57	74627	27	5	AT1G33590.1;AT1G33590.3;AT1G33590.2	AT1G33590.1;AT1G33590.3;AT1G33590.2	350
13.7758	14.6303	NaN	NaN	NaN	NaN				-1	3	3	3	10.8	10.8	10.8	53.803	0	26.282	110380	20	6	AT1G33980.1;AT1G33980.2	AT1G33980.1;AT1G33980.2	351
NaN	NaN	NaN	NaN	NaN	NaN				-1	1	1	1	4	4	4	38.854	0.0025529	6.5349	20885	23	1	AT1G33990.1	AT1G33990.1	352
NaN	NaN	NaN	NaN	NaN	NaN				-1	1	1	1	3.2	3.2	3.2	48.306	0.0025641	6.5947	21203	23	2	AT1G34430.1	AT1G34430.1	353
16.8007	17.1274	16.7412	17.2995	17.4002	17.681				-1	12	5	5	50.9	31.1	31.1	30.194	0	98.563	1795600	18	18	AT1G35160.1;AT1G35160.2	AT1G35160.1;AT1G35160.2	354
NaN	NaN	NaN	17.0224	16.9404	17.091				-1	15	15	15	27.4	27.4	27.4	111.28	0	248.76	2071800	50	35	AT1G35220.3;AT1G35220.2;AT1G35220.1;AT1G35220.7;AT1G35220.4;AT1G35220.6;AT1G35220.5	AT1G35220.3;AT1G35220.2;AT1G35220.1;AT1G35220.7;AT1G35220.4;AT1G35220.6;AT1G35220.5	355
NaN	NaN	NaN	NaN	NaN	NaN				-1	1	1	1	2	2	2	87.395	0.0014826	6.7343	41003	39	2	AT1G35350.1	AT1G35350.1	356
NaN	NaN	NaN	NaN	NaN	NaN				-1	1	1	1	3.6	3.6	3.6	49.85	0.003255	6.4119	87930	16	3	AT1G35620.1	AT1G35620.1	357
17.0127	16.9366	NaN	17.4711	17.2652	17.2296				-1	3	3	3	32.3	32.3	32.3	24.038	0	68.968	1242800	13	13	AT1G35680.1	AT1G35680.1	358
18.7858	18.7499	18.8695	18.8621	19.0288	19.1832				-1	15	15	15	65.6	65.6	65.6	36.203	0	323.31	8393900	21	71	AT1G35720.1	AT1G35720.1	359
16.6233	16.6379	16.7036	16.8341	16.8606	16.865				-1	24	24	24	16.9	16.9	16.9	251.38	0	220.5	3871900	123	87	AT1G36160.2;AT1G36160.1;AT1G36180.1;AT1G36180.2;AT1G36180.3	AT1G36160.2;AT1G36160.1	360
16.8778	17.4317	17.2238	16.4977	16.6125	16.2684				-1	12	12	9	33.9	33.9	28.9	48.622	0	167.32	3330100	24	48	AT1G36730.1	AT1G36730.1	361
NaN	NaN	NaN	NaN	15.1983	15.1452				-1	3	3	3	3.4	3.4	3.4	102.84	0	18.465	167050	46	5	AT1G37130.1	AT1G37130.1	362
NaN	NaN	NaN	NaN	NaN	NaN				-1	1	1	1	3	3	3	60.455	0	13.312	500070	25	7	AT4G22010.1;AT1G41830.1	AT4G22010.1;AT1G41830.1	363
NaN	NaN	NaN	16.885	17.2102	17.1213				-1	5	5	2	51.4	51.4	24.3	12.799	0	56.173	920290	5	14	AT1G41880.1;AT1G41880.2;AT1G07070.1	AT1G41880.1;AT1G41880.2	364
NaN	NaN	NaN	NaN	NaN	NaN				-1	2	2	2	3.3	3.3	3.3	138.28	0	19.131	70230	67	3	AT1G42470.1	AT1G42470.1	365
18.0106	17.9687	17.8657	18.5086	18.5936	18.542				-1	26	26	26	42.6	42.6	42.6	93.874	0	323.31	13508000	54	132	AT1G42550.1	AT1G42550.1	366
NaN	16.8496	17.0529	16.8307	16.9369	16.949				-1	4	3	3	9.6	6.5	6.5	47.659	0	89.131	956520	28	13	AT1G42970.1	AT1G42970.1	367
19.3411	19.1839	19.2363	19.4839	19.5787	19.516				-1	17	17	11	47.8	47.8	36.2	44.559	0	274.83	12684000	25	86	AT1G43170.9;AT1G43170.8;AT1G43170.7;AT1G43170.6;AT1G43170.5;AT1G43170.3;AT1G43170.2;AT1G43170.1;AT1G43170.4	AT1G43170.9;AT1G43170.8;AT1G43170.7;AT1G43170.6;AT1G43170.5;AT1G43170.3;AT1G43170.2;AT1G43170.1;AT1G43170.4	368
16.0226	16.0751	16.1573	16.3891	16.5209	16.4406				-1	3	3	3	19.3	19.3	19.3	48.02	0	76.516	979110	19	14	AT1G43190.3;AT1G43190.2;AT1G43190.1	AT1G43190.3;AT1G43190.2;AT1G43190.1	369
NaN	NaN	NaN	NaN	NaN	NaN				-1	1	1	1	4.4	4.4	4.4	37.287	0	18.85	33534	15	3	AT1G43670.1	AT1G43670.1	370
NaN	NaN	NaN	NaN	NaN	NaN				-1	1	1	1	7	7	7	37.791	0.00042088	9.0492	45007	15	1	AT1G43700.1	AT1G43700.1	371
16.9788	17.0615	17.0294	15.8824	16.0677	15.9207				-1	5	5	3	17.6	17.6	14.8	44.155	0	59.567	1416900	22	26	AT1G43800.1	AT1G43800.1	372
16.6687	17.0767	16.8695	16.6955	16.5784	16.5454				-1	4	4	4	19.5	19.5	19.5	42.231	0	125.93	1197700	23	15	AT1G43860.1;AT1G43860.2	AT1G43860.1;AT1G43860.2	373
NaN	NaN	NaN	NaN	NaN	NaN				-1	3	3	3	20.3	20.3	20.3	23.53	0	26.499	145790	14	6	AT1G43890.3;AT1G43890.2;AT1G43890.1	AT1G43890.3;AT1G43890.2;AT1G43890.1	374
NaN	NaN	NaN	NaN	NaN	NaN				-1	1	1	1	3.8	3.8	3.8	40.582	0.001482	6.7327	39917	20	2	AT1G43900.1	AT1G43900.1	375
18.4924	18.5864	18.4942	18.1122	18.1262	18.1065				-1	16	16	16	28.7	28.7	28.7	60.33	0	323.31	10240000	27	87	AT1G44446.1;AT1G44446.2;AT1G44446.3;AT1G44446.4	AT1G44446.1;AT1G44446.2;AT1G44446.3;AT1G44446.4	376
NaN	NaN	NaN	NaN	NaN	NaN				-1	1	1	1	4.2	4.2	4.2	33.71	0	12.894	91841	14	3	AT1G44835.1;AT1G44835.2	AT1G44835.1;AT1G44835.2	377
15.6476	16.796	15.7827	14.533	15.4173	14.845				-1	12	12	12	17.3	17.3	17.3	105.64	0	137.64	931520	34	27	AT1G44910.2;AT1G44910.1	AT1G44910.2;AT1G44910.1	378
20.8778	20.7944	20.642	19.4137	19.5051	19.5235				-1	21	21	1	64.4	64.4	4.3	44.755	0	323.31	16000000	23	97	AT1G45000.1;AT1G45000.2	AT1G45000.1;AT1G45000.2	379
16.1497	NaN	15.8286	15.7536	15.9031	15.359				-1	4	4	4	13.7	13.7	13.7	44.118	0	26.51	732830	22	16	AT1G45201.2;AT1G45201.1;AT1G45201.3	AT1G45201.2;AT1G45201.1;AT1G45201.3	380
NaN	NaN	NaN	NaN	NaN	NaN				-1	5	5	5	12.9	12.9	12.9	83.178	0	27.983	135210	36	7	AT1G45332.1;AT1G45332.2;AT2G45030.1	AT1G45332.1;AT1G45332.2;AT2G45030.1	381
NaN	NaN	NaN	20.3079	20.4147	20.2099				-1	14	14	14	48.5	48.5	48.5	37.201	0	323.31	18921000	16	50	AT1G45688.1;AT1G45688.2	AT1G45688.1	382
NaN	NaN	NaN	15.2815	15.6962	15.3766				-1	2	2	2	11.9	11.9	11.9	50.966	0	18.191	331170	19	8	AT1G47128.1	AT1G47128.1	383
NaN	NaN	NaN	NaN	NaN	NaN				-1	1	1	1	9	9	9	16.634	0	35.456	92653	7	4	AT5G43070.1;AT1G47200.1	AT5G43070.1;AT1G47200.1	384
NaN	NaN	NaN	NaN	NaN	NaN				-1	4	4	4	18.9	18.9	18.9	46.421	0	27.31	262500	25	9	AT1G47380.1	AT1G47380.1	385
15.7556	15.6909	15.9357	15.8483	15.3862	15.7237				-1	4	4	4	23	23	23	28.106	0	47.824	987650	16	24	AT1G47420.1	AT1G47420.1	386
18.1818	18.1651	18.0421	17.3443	17.4354	17.4298				-1	19	19	19	25.6	25.6	25.6	100.06	0	323.31	8208900	42	101	AT1G47550.1;AT1G47550.2;AT1G47560.1	AT1G47550.1;AT1G47550.2;AT1G47560.1	387
NaN	NaN	NaN	15.2305	15.5275	15.4244				-1	4	3	3	7.5	6.3	6.3	118.25	0	41.193	216220	65	8	AT1G47900.2;AT1G47900.3;AT1G47900.1	AT1G47900.2;AT1G47900.3;AT1G47900.1	388
NaN	NaN	NaN	NaN	NaN	NaN				-1	1	1	1	0.3	0.3	0.3	457.42	0.0025473	6.4955	56231	202	2	AT1G48090.5;AT1G48090.6;AT1G48090.4;AT1G48090.1;AT1G48090.3;AT1G48090.2	AT1G48090.5;AT1G48090.6;AT1G48090.4;AT1G48090.1;AT1G48090.3;AT1G48090.2	389
NaN	NaN	NaN	NaN	NaN	NaN				-1	4	4	4	35.9	35.9	35.9	16.274	0	23.909	256260	8	7	AT1G48160.2;AT1G48160.1	AT1G48160.2;AT1G48160.1	390
NaN	NaN	NaN	NaN	NaN	NaN				-1	5	2	2	20	12.1	12.1	29.887	0	15.795	202870	13	5	AT1G48240.1;AT1G48240.2	AT1G48240.1;AT1G48240.2	391
17.4921	17.6734	17.9331	17.6865	17.272	17.0891				-1	5	5	5	20.6	20.6	20.6	18.726	0	88.705	1616300	11	20	AT1G48350.1	AT1G48350.1	392
NaN	NaN	NaN	16.0289	16.0005	15.9957				-1	5	5	5	22.2	22.2	22.2	43.9	0	75.07	625740	20	15	AT1G48420.3;AT1G48420.2;AT1G48420.1	AT1G48420.3;AT1G48420.2;AT1G48420.1	393
NaN	NaN	NaN	NaN	NaN	NaN				-1	1	1	1	4.8	4.8	4.8	38.907	0.00076834	7.1597	10796	16	1	AT1G48470.1	AT1G48470.1	394
17.1542	17.3039	17.3031	16.5095	16.3017	16.3694				-1	6	6	6	16.5	16.5	16.5	71.13	0	66.031	2376400	34	37	AT1G48480.1	AT1G48480.1	395
NaN	NaN	NaN	NaN	NaN	NaN				-1	1	1	1	4.4	4.4	4.4	52.508	0.002552	6.5346	92520	31	3	AT1G48520.2;AT1G48520.3;AT1G48520.1	AT1G48520.2;AT1G48520.3;AT1G48520.1	396
15.9795	16.1073	16.2268	16.4147	16.485	16.3906				-1	16	9	9	40.2	25.1	25.1	54.018	0	130.95	2029100	30	49	AT1G48600.1;AT1G48600.2	AT1G48600.1;AT1G48600.2	397
16.7945	16.7646	16.973	16.8802	16.9127	16.9305				-1	11	11	5	41.1	41.1	25.8	35.8	0	155.19	3686200	20	58	AT1G48630.1	AT1G48630.1	398
NaN	NaN	NaN	NaN	NaN	NaN				-1	1	1	1	1.6	1.6	1.6	97.153	0	35.726	275770	45	5	AT1G48760.3;AT1G48760.2;AT1G48760.1	AT1G48760.3;AT1G48760.2;AT1G48760.1	399
20.184	20.258	20.2169	19.4991	19.3632	19.4012				-1	15	15	15	67	67	67	21.922	0	213.24	17841000	8	76	AT1G48830.2;AT1G48830.1	AT1G48830.2;AT1G48830.1	400
14.9454	NaN	15.0741	14.8868	14.9342	15.2526				-1	2	2	2	10.8	10.8	10.8	41.066	0	41.311	368610	22	11	AT1G48850.3;AT1G48850.2;AT1G48850.1	AT1G48850.3;AT1G48850.2;AT1G48850.1	401
15.814	16.3225	16.0238	16.0889	16.1026	15.7513				-1	4	4	4	22.3	22.3	22.3	47.726	0	81.832	1106900	29	21	AT1G48900.2;AT1G48900.1;AT1G15310.1	AT1G48900.2;AT1G48900.1	402
15.8507	16.1881	15.7453	15.865	15.5677	15.6265				-1	7	7	7	15.4	15.4	15.4	58.773	0	75.38	888890	31	21	AT1G48920.1	AT1G48920.1	403
NaN	NaN	NaN	NaN	NaN	NaN				-1	1	1	1	1.9	1.9	1.9	101.65	0	54.991	95133	43	3	AT1G49040.4;AT1G49040.2;AT1G49040.3;AT1G49040.1	AT1G49040.4;AT1G49040.2;AT1G49040.3;AT1G49040.1	404
14.6648	14.6672	NaN	NaN	NaN	14.5283				-1	3	3	3	3.1	3.1	3.1	223.34	0	21.326	256590	104	11	AT1G49340.4;AT1G49340.3;AT1G49340.2;AT1G49340.1	AT1G49340.4;AT1G49340.3;AT1G49340.2;AT1G49340.1	405
NaN	NaN	NaN	NaN	NaN	NaN				-1	1	1	1	5.4	5.4	5.4	57.634	0	19.226	142300	26	4	AT1G49430.2;AT1G49430.1	AT1G49430.2;AT1G49430.1	406
16.1788	15.654	NaN	NaN	NaN	15.9297				-1	2	2	2	11.9	11.9	11.9	48.483	0	17.081	373590	13	9	AT1G49600.1;AT1G49600.3;AT1G49600.2	AT1G49600.1;AT1G49600.3;AT1G49600.2	407
NaN	NaN	NaN	NaN	NaN	NaN				-1	4	4	4	14	14	14	67.943	0	24.329	140710	35	7	AT1G49670.1;AT1G49670.2	AT1G49670.1;AT1G49670.2	408
NaN	NaN	NaN	15.4459	15.6382	15.6857				-1	8	8	7	20.6	20.6	17	72.779	0	60.312	543530	31	17	AT1G49760.2;AT1G49760.1	AT1G49760.2;AT1G49760.1	409
NaN	NaN	14.3209	14.218	NaN	14.5628				-1	2	2	2	11.4	11.4	11.4	42.627	0	21.262	187260	24	9	AT1G49970.1	AT1G49970.1	410
NaN	NaN	NaN	NaN	NaN	NaN				-1	1	1	1	6.2	6.2	6.2	59.105	0.0056517	6.0952	18096	29	1	AT1G50120.1;AT1G50120.2	AT1G50120.1;AT1G50120.2	411
NaN	NaN	NaN	NaN	NaN	NaN				-1	1	1	1	1.9	1.9	1.9	111.04	0.0011407	7.0307	277390	51	6	AT1G50140.5;AT1G50140.2;AT3G19740.1;AT1G50140.4;AT1G50140.3;AT1G50140.1	AT1G50140.5;AT1G50140.2;AT3G19740.1;AT1G50140.4;AT1G50140.3;AT1G50140.1	412
15.6134	15.7768	15.7449	18.0529	16.9887	16.9187				-1	15	15	15	22	22	22	110.49	0	168.18	2492300	54	39	AT1G50200.1;AT1G50200.2	AT1G50200.1;AT1G50200.2	413
NaN	NaN	NaN	NaN	NaN	NaN				-1	10	1	1	19.6	2.9	2.9	76.758	0.0018437	6.6576	24403	33	1	AT1G50250.1	AT1G50250.1	414
NaN	NaN	NaN	NaN	NaN	NaN				-1	1	1	1	6	6	6	31.28	0.00042517	9.6331	99847	14	3	AT1G50300.2;AT1G50300.1	AT1G50300.2;AT1G50300.1	415
15.8657	15.625	15.7112	17.0736	16.9994	17.0027				-1	11	11	11	41	41	41	67.801	0	172.76	2617000	28	41	AT1G50480.1	AT1G50480.1	416
NaN	NaN	NaN	NaN	NaN	NaN				-1	2	2	2	7.4	7.4	7.4	76.815	0	14.352	79977	37	3	AT1G50500.5;AT1G50500.4;AT1G50500.3;AT1G50500.1;AT1G50500.2	AT1G50500.5;AT1G50500.4;AT1G50500.3;AT1G50500.1;AT1G50500.2	417
20.4072	20.1982	20.0913	20.0601	20.1393	20.2356				-1	11	11	11	52.7	52.7	52.7	34.799	0	323.31	18067000	19	67	AT1G50510.1	AT1G50510.1	418
NaN	NaN	NaN	NaN	NaN	NaN				-1	1	1	1	6.7	6.7	6.7	23.425	0.00041374	8.4647	98567	12	4	AT1G50670.3;AT1G50670.2;AT1G50670.1	AT1G50670.3;AT1G50670.2;AT1G50670.1	419
NaN	NaN	NaN	NaN	NaN	NaN				-1	7	1	1	28.5	4.8	4.8	53.679	0.0059859	6.0544	39263	29	3	AT1G50700.3;AT1G50700.1;AT1G50700.2	AT1G50700.3;AT1G50700.1;AT1G50700.2	420
NaN	NaN	NaN	15.8998	15.6878	15.7663				-1	5	5	5	23.4	23.4	23.4	47.769	0	38.356	529030	17	12	AT1G50710.1	AT1G50710.1	421
15.5888	15.8594	15.913	15.4667	15.4645	15.6565				-1	7	7	7	12.4	12.4	12.4	76.848	0	57.32	774850	33	21	AT1G50920.1	AT1G50920.1	422
NaN	NaN	NaN	NaN	NaN	NaN				-1	1	1	1	5.2	5.2	5.2	23.651	0.00042463	9.5368	149310	12	6	AT1G51360.1	AT1G51360.1	423
13.6578	14.1343	NaN	17.3675	17.5128	17.4499				-1	14	14	12	26.2	26.2	23.6	76.45	0	161.96	3337200	34	46	AT1G51500.1	AT1G51500.1	424
NaN	NaN	NaN	NaN	NaN	NaN				-1	2	2	2	11.9	11.9	11.9	22.438	0	19.248	245900	4	4	AT1G51510.1	AT1G51510.1	425
NaN	NaN	NaN	NaN	NaN	NaN				-1	1	1	1	3.4	3.4	3.4	46.747	0.0014798	6.7055	2768100	25	4	AT1G51540.1	AT1G51540.1	426
NaN	NaN	NaN	NaN	NaN	NaN				-1	2	2	2	15.6	15.6	15.6	43.582	0	11.055	68856	18	4	AT1G51560.1	AT1G51560.1	427
NaN	NaN	NaN	15.5598	15.7198	15.4364				-1	4	4	4	9.9	9.9	9.9	89.153	0	35.38	403090	32	12	AT1G51570.1;AT3G57880.4;AT3G57880.3;AT3G57880.2;AT3G57880.1	AT1G51570.1;AT3G57880.4;AT3G57880.3;AT3G57880.2;AT3G57880.1	428
15.7081	15.959	NaN	15.2045	15.1981	15.1698				-1	2	2	2	45.7	45.7	45.7	7.8319	0	20.985	444910	3	11	AT1G51650.1	AT1G51650.1	429
13.7563	13.5505	13.6111	17.3978	17.4159	17.1219				-1	10	10	10	37.8	37.8	37.8	56.934	0	268.78	2115200	25	37	AT1G51690.4;AT1G51690.1;AT1G51690.2;AT1G51690.5;AT1G51690.3	AT1G51690.4;AT1G51690.1;AT1G51690.2;AT1G51690.5;AT1G51690.3	430
15.2075	NaN	15.3536	NaN	NaN	15.6715				-1	2	2	2	4.5	4.5	4.5	49.486	0	15.173	401110	20	9	AT1G51710.2;AT1G51710.1	AT1G51710.2;AT1G51710.1	431
14.2248	NaN	14.1896	NaN	NaN	NaN				-1	3	3	3	13.2	13.2	13.2	48.263	0	29.286	138180	16	9	AT1G51760.1	AT1G51760.1	432
NaN	NaN	NaN	NaN	NaN	NaN				-1	1	1	1	1.3	1.3	1.3	99.637	0.00041736	8.7454	121200	46	3	AT1G51800.1	AT1G51800.1	433
18.2605	17.2301	16.4684	15.4176	15.4311	14.0021				-1	13	11	10	26.5	21.5	20	98.075	0	154.83	2138900	44	36	AT1G51805.1;AT1G51805.2	AT1G51805.1;AT1G51805.2	434
NaN	NaN	NaN	NaN	NaN	NaN				-1	7	4	4	10.3	6.6	6.6	98.097	0	24.234	292870	42	6	AT1G51820.1;AT1G51820.2	AT1G51820.1	435
NaN	NaN	NaN	NaN	NaN	NaN				-1	1	1	1	3.6	3.6	3.6	76.631	0.00040883	8.1732	21222	28	1	AT1G51830.1;AT1G51830.2	AT1G51830.1;AT1G51830.2	436
NaN	NaN	NaN	NaN	NaN	NaN				-1	1	1	1	8.7	8.7	8.7	23.569	0.0018477	6.6918	68656	8	2	AT1G51840.5;AT1G51840.4;AT1G51840.3;AT1G51840.2;AT1G51840.1	AT1G51840.5;AT1G51840.4;AT1G51840.3;AT1G51840.2;AT1G51840.1	437
18.9425	18.434	18.6121	16.166	16.5756	16.0748				-1	20	20	17	34.6	34.6	28.4	98.329	0	319.1	6743100	41	74	AT1G51850.2;AT1G51850.1;AT2G04300.1;AT2G04300.2;AT3G21340.1	AT1G51850.2;AT1G51850.1	438
15.1613	15.2765	NaN	NaN	NaN	NaN				-1	2	2	1	4.5	4.5	1.7	99.233	0	37.097	196950	45	6	AT1G51860.1;AT1G51860.2;AT1G51890.3	AT1G51860.1;AT1G51860.2;AT1G51890.3	439
NaN	NaN	NaN	NaN	NaN	NaN				-1	2	1	1	7.3	3.1	3.1	67.679	0.00041288	8.4122	63662	29	2	AT1G51890.5;AT1G51890.4;AT1G51890.1;AT1G51890.2	AT1G51890.5;AT1G51890.4;AT1G51890.1;AT1G51890.2	440
15.3864	15.4752	15.3876	15.3802	15.2912	15.767				-1	4	4	4	18.5	18.5	18.5	54.401	0	45.842	621560	24	17	AT1G51980.1;AT1G51980.2;AT3G16480.1	AT1G51980.1;AT1G51980.2	441
18.0717	NaN	17.2103	17.4427	NaN	17.9617				-1	2	2	2	23.2	23.2	23.2	10.771	0	29.647	2122700	4	10	AT3G16080.1;AT1G52300.1;AT3G16080.2;AT1G15250.2;AT1G15250.1	AT3G16080.1;AT1G52300.1;AT3G16080.2;AT1G15250.2;AT1G15250.1	442
15.9876	16.0037	16.0692	NaN	15.1798	NaN				-1	5	5	5	16.1	16.1	16.1	54.951	0	51.468	445950	29	14	AT1G52320.4;AT1G52320.3;AT1G52320.1;AT1G52320.5;AT1G52320.2	AT1G52320.4;AT1G52320.3;AT1G52320.1;AT1G52320.5;AT1G52320.2	443
NaN	NaN	NaN	NaN	NaN	NaN				-1	8	2	2	14	3.5	3.5	104.22	0	17.35	288930	48	7	AT1G52360.3;AT1G52360.4;AT1G52360.1;AT1G52360.2	AT1G52360.3;AT1G52360.4;AT1G52360.1;AT1G52360.2	444
NaN	NaN	NaN	NaN	NaN	NaN				-1	1	1	1	5.4	5.4	5.4	25.003	0.0011398	7.0283	130620	10	3	AT1G52500.5;AT1G52500.3;AT1G52500.1;AT1G52500.4;AT1G52500.2	AT1G52500.5;AT1G52500.3;AT1G52500.1;AT1G52500.4;AT1G52500.2	445
15.6482	15.6744	15.6516	NaN	NaN	NaN				-1	4	4	4	21.6	21.6	21.6	39.658	0	39.84	277940	19	9	AT1G52540.2;AT1G52540.1;AT3G15890.1	AT1G52540.2;AT1G52540.1;AT3G15890.1	446
21.6699	21.453	21.5579	21.4147	21.4924	21.3049				-1	16	3	3	14.9	3.1	3.1	91.597	0	232.72	36338000	47	31	AT1G52570.3;AT1G52570.2;AT1G52570.1;AT5G25370.4;AT5G25370.3;AT5G25370.2;AT5G25370.1	AT1G52570.3;AT1G52570.2;AT1G52570.1	447
NaN	NaN	NaN	NaN	NaN	NaN				-1	1	1	1	14.4	14.4	14.4	13.2	0.0066341	5.9965	10801	6	1	AT4G13570.1;AT4G13570.2;AT1G52740.1;AT3G54560.2;AT3G54560.1;AT2G38810.4;AT2G38810.3;AT2G38810.2;AT2G38810.1	AT4G13570.1;AT4G13570.2;AT1G52740.1;AT3G54560.2;AT3G54560.1;AT2G38810.4;AT2G38810.3;AT2G38810.2;AT2G38810.1	448
16.7358	16.8253	16.9142	NaN	NaN	NaN				-1	7	7	7	33.4	33.4	33.4	36.975	0	65.107	796400	11	13	AT1G52760.1	AT1G52760.1	449
NaN	NaN	NaN	NaN	NaN	NaN				-1	1	1	1	3	3	3	65.037	0.0014892	6.7871	24448	28	2	AT1G52980.1	AT1G52980.1	450
NaN	NaN	NaN	15.662	15.3308	15.4029				-1	3	3	3	7.4	7.4	7.4	75.446	0	36.769	279470	39	9	AT1G53165.1;AT1G53165.2;AT1G53165.3	AT1G53165.1;AT1G53165.2;AT1G53165.3	451
16.3213	16.2183	16.0148	NaN	NaN	NaN				-1	5	5	5	12.8	12.8	12.8	63.416	0	73.152	552920	18	15	AT1G53210.1	AT1G53210.1	452
18.9383	18.9851	19.0948	18.8095	18.8303	19.048				-1	11	11	10	47.8	47.8	44.3	35.804	0	284.11	14243000	15	71	AT1G53240.1;AT3G15020.2;AT3G15020.1	AT1G53240.1;AT3G15020.2;AT3G15020.1	453
NaN	NaN	NaN	NaN	NaN	NaN				-1	2	2	2	8.7	8.7	8.7	25.881	0	13.038	103330	12	3	AT1G53260.2;AT1G53260.1;AT3G15000.1	AT1G53260.2;AT1G53260.1;AT3G15000.1	454
NaN	NaN	NaN	NaN	NaN	NaN				-1	1	1	1	5.9	5.9	5.9	40.361	0.00041102	8.3054	198440	15	6	AT1G53280.2;AT1G53280.1	AT1G53280.2;AT1G53280.1	455
16.4779	16.4674	16.6579	16.9772	17.0275	17.0347				-1	22	22	12	38.6	38.6	25.1	110.28	0	311.18	3999000	59	102	AT1G53310.3;AT1G53310.2;AT1G53310.1	AT1G53310.3;AT1G53310.2;AT1G53310.1	456
NaN	14.9344	14.9273	NaN	NaN	NaN				-1	4	4	4	7.9	7.9	7.9	104.06	0	31.943	196210	49	8	AT1G53350.1	AT1G53350.1	457
NaN	NaN	NaN	NaN	NaN	NaN				-1	1	1	1	13.2	13.2	13.2	12.706	0.0004065	8.0585	768050	5	4	AT1G53400.1	AT1G53400.1	458
16.0572	16.0829	16.0947	15.774	15.9455	15.7609				-1	6	5	3	8.2	7.2	4.1	110.23	0	92.343	1002800	55	25	AT1G53430.2;AT1G53430.1;AT1G07650.4;AT1G07650.3;AT1G07650.1;AT1G07650.2	AT1G53430.2;AT1G53430.1	459
17.2591	17.077	17.3022	16.9859	16.8245	17.053				-1	11	5	2	26.1	11.5	4.6	75.225	0	32.709	1194700	38	19	AT1G53500.1	AT1G53500.1	460
15.8593	16.3168	16.0045	15.8226	15.8393	15.4589				-1	4	4	4	18.1	18.1	18.1	40.014	0	66.2	783760	20	17	AT1G53720.2;AT1G53720.1	AT1G53720.2;AT1G53720.1	461
14.9905	14.6788	NaN	15.6741	15.561	15.2396				-1	6	6	6	12.2	12.2	12.2	78.084	0	58.758	593280	33	19	AT1G53730.1;AT1G53730.2	AT1G53730.1;AT1G53730.2	462
19.013	18.9854	18.8199	17.6269	17.7699	17.7825				-1	18	18	18	56.3	56.3	56.3	47.803	0	248.25	10775000	28	63	AT1G53750.1	AT1G53750.1	463
NaN	16.8721	16.7181	NaN	NaN	NaN				-1	3	2	2	9.9	6.5	6.5	64.172	0	41.55	636490	28	8	AT1G53830.1	AT1G53830.1	464
17.0851	16.9816	17.3096	16.1436	16.2792	16.4562				-1	5	5	1	40.5	40.5	8.4	25.947	0	108.98	1516500	14	30	AT1G53850.2;AT1G53850.1	AT1G53850.2;AT1G53850.1	465
NaN	NaN	NaN	NaN	NaN	NaN				-1	1	1	1	3.5	3.5	3.5	47.233	0	19.762	96756	12	2	AT1G54080.1;AT3G14100.1;AT1G54080.2	AT1G54080.1;AT3G14100.1;AT1G54080.2	466
NaN	NaN	NaN	15.1194	15.1071	15.2328				-1	3	3	3	10.8	10.8	10.8	54.208	0	40.42	313720	24	10	AT1G54100.2;AT1G54100.1	AT1G54100.2;AT1G54100.1	467
19.4521	19.346	19.4474	18.8249	18.6618	18.9843				-1	32	27	27	60.5	55.3	55.3	58.467	0	323.31	35530000	32	184	AT1G54220.2;AT1G54220.1	AT1G54220.2;AT1G54220.1	468
15.4059	15.2454	15.3156	15.3748	NaN	15.357				-1	18	3	0	47.3	8.3	0	46.762	0	89.083	548580	23	14	AT1G54270.1	AT1G54270.1	469
15.4006	NaN	15.6615	15.1068	15.193	15.0484				-1	2	2	2	21.2	21.2	21.2	12.62	0	27.148	390500	4	11	AT5G54760.4;AT5G54760.3;AT5G54760.2;AT5G54760.1;AT4G27130.1;AT1G54290.1;AT5G54940.3;AT5G54940.2;AT5G54940.1	AT5G54760.4;AT5G54760.3;AT5G54760.2;AT5G54760.1;AT4G27130.1;AT1G54290.1;AT5G54940.3;AT5G54940.2;AT5G54940.1	470
16.2	16.2485	NaN	16.2645	16.311	16.3438				-1	3	3	3	14	14	14	38.954	0	49.073	665700	16	16	AT1G54320.1	AT1G54320.1	471
NaN	17.3684	NaN	NaN	18.2865	NaN				-1	3	3	3	34.7	34.7	34.7	10.796	0	28.787	948100	5	8	AT1G54410.1	AT1G54410.1	472
NaN	NaN	NaN	NaN	NaN	NaN				-1	1	1	1	5.1	5.1	5.1	42.843	0.0011232	6.8697	66991	19	3	AT1G54520.1	AT1G54520.1	473
NaN	NaN	NaN	NaN	NaN	NaN				-1	1	1	1	15	15	15	11.507	0.0076602	5.9617	13480	7	1	AT1G54630.2;AT1G54630.1;AT1G54580.1	AT1G54630.2;AT1G54630.1;AT1G54580.1	474
NaN	NaN	NaN	NaN	NaN	NaN				-1	1	1	1	6.3	6.3	6.3	21.68	0.00040683	8.0689	149660	7	6	AT1G54770.2;AT1G54770.1;AT5G30495.2;AT5G30495.1	AT1G54770.2;AT1G54770.1;AT5G30495.2;AT5G30495.1	475
15.8344	15.8464	NaN	NaN	NaN	NaN				-1	7	7	6	13.7	13.7	11.4	98.044	0	50.321	311660	48	10	AT1G55020.1	AT1G55020.1	476
NaN	NaN	NaN	NaN	NaN	NaN				-1	1	1	1	10.4	10.4	10.4	13.604	0.0003992	7.7339	41880	4	2	AT3G13660.1;AT1G55210.2;AT1G55210.1	AT3G13660.1;AT1G55210.2;AT1G55210.1	477
NaN	NaN	NaN	NaN	NaN	NaN				-1	1	1	1	12.7	12.7	12.7	25.528	0	14.156	59725	10	3	AT1G55310.5;AT1G55310.2;AT1G55310.1;AT1G55310.3	AT1G55310.5;AT1G55310.2;AT1G55310.1;AT1G55310.3	478
NaN	NaN	NaN	15.6034	NaN	15.6641				-1	3	3	3	9.6	9.6	9.6	34.475	0	34.095	225330	18	8	AT1G55450.1;AT1G55450.2	AT1G55450.1;AT1G55450.2	479
19.3502	19.3681	19.2993	19.2957	19.2053	19.3532				-1	24	24	4	50.2	50.2	10.8	63.808	0	323.31	16857000	36	142	AT1G55490.5;AT1G55490.4;AT1G55490.3;AT1G55490.2;AT1G55490.1	AT1G55490.5;AT1G55490.4;AT1G55490.3;AT1G55490.2;AT1G55490.1	480
NaN	NaN	NaN	NaN	NaN	NaN				-1	4	4	4	21.9	21.9	21.9	17.085	0	22.396	243110	9	7	AT1G55670.1	AT1G55670.1	481
NaN	NaN	NaN	NaN	NaN	NaN				-1	1	1	1	6.7	6.7	6.7	33.85	0.0011282	6.9004	49993	20	3	AT1G55840.2;AT1G55840.1	AT1G55840.2;AT1G55840.1	482
14.8117	14.8234	NaN	14.8603	14.7494	14.8084				-1	3	3	3	11.2	11.2	11.2	45.628	0	22.48	306290	22	12	AT1G56050.1	AT1G56050.1	483
20.4106	20.3296	20.3459	20.6772	20.67	20.7685				-1	52	52	47	71.8	71.8	63.3	93.89	0	323.31	64475000	44	340	AT1G56070.3;AT1G56070.2;AT1G56070.1;AT3G12915.2	AT1G56070.3;AT1G56070.2;AT1G56070.1	484
16.9978	17.3648	17.243	16.5572	16.5822	16.4996				-1	16	16	16	34.3	34.3	34.3	58.673	0	163.33	4739100	25	69	AT1G56110.1;AT3G12860.1	AT1G56110.1	485
NaN	NaN	NaN	NaN	NaN	NaN				-1	1	1	1	1.5	1.5	1.5	113.75	0.00041356	8.4571	20953	47	1	AT1G56140.1	AT1G56140.1	486
16.4007	16.2666	15.8654	15.8272	15.8272	15.7868				-1	6	6	6	11.4	11.4	11.4	100.34	0	114.97	1390500	48	32	AT1G56145.3;AT1G56145.1;AT1G56145.2	AT1G56145.3;AT1G56145.1;AT1G56145.2	487
NaN	NaN	NaN	NaN	NaN	NaN				-1	1	1	1	8.6	8.6	8.6	15.702	0.00039872	7.6923	140550	8	3	AT1G56200.2;AT1G56200.1	AT1G56200.2;AT1G56200.1	488
NaN	NaN	NaN	16.1294	15.6942	NaN				-1	4	4	4	24.1	24.1	24.1	30.11	0	25.109	336750	10	7	AT1G56423.1;AT1G56423.2	AT1G56423.1;AT1G56423.2	489
15.6511	15.6931	15.8468	NaN	15.5868	NaN				-1	3	3	3	18.7	18.7	18.7	27.651	0	20.347	480530	12	10	AT1G56450.1	AT1G56450.1	490
15.6793	NaN	15.6145	NaN	NaN	NaN				-1	4	4	4	47.6	47.6	47.6	18.406	0	29.012	398790	11	11	AT1G56580.1	AT1G56580.1	491
14.5893	NaN	14.7377	NaN	NaN	NaN				-1	1	1	1	8	8	8	23.888	0.00043122	10.214	117790	7	6	AT1G57620.1	AT1G57620.1	492
18.4178	18.4654	18.4815	19.5172	19.4575	19.5475				-1	13	13	6	43.1	43.1	20.8	46.4	0	171.48	8639700	18	60	AT1G57720.2;AT1G57720.1	AT1G57720.2;AT1G57720.1	493
NaN	14.6858	14.5871	15.1405	15.201	14.8216				-1	3	3	3	1.6	1.6	1.6	269.76	0	22.545	360330	111	14	AT1G58230.3;AT1G58230.2;AT1G58230.1	AT1G58230.3;AT1G58230.2;AT1G58230.1	494
NaN	NaN	NaN	18.1981	18.0187	NaN				-1	7	1	1	28.9	6.7	6.7	30.771	0	45.601	1829600	16	11	AT1G59359.1;AT1G58983.1;AT1G58684.1;AT1G58380.1;AT3G57490.1	AT1G59359.1;AT1G58983.1;AT1G58684.1;AT1G58380.1	495
NaN	NaN	NaN	NaN	NaN	NaN				-1	1	1	1	3.8	3.8	3.8	58.174	0.00040241	7.8463	289540	23	3	AT1G58440.1	AT1G58440.1	496
19.1461	18.9631	18.9069	18.9702	18.9417	19.0708				-1	35	21	21	51.2	34.3	34.3	100.23	0	323.31	16355000	56	105	AT1G59610.1	AT1G59610.1	497
NaN	NaN	NaN	14.9268	14.89	NaN				-1	2	2	2	3.1	3.1	3.1	137.75	0	12.577	140910	60	5	AT1G59820.1	AT1G59820.1	498
NaN	NaN	NaN	17.7266	17.7086	17.5909				-1	7	7	4	45.4	45.4	25.5	34.96	0	177.56	1944900	18	24	AT1G59830.1;AT1G59830.2	AT1G59830.1;AT1G59830.2	499
18.4455	18.3987	18.4322	17.0073	17.0493	16.9919				-1	39	39	20	28.6	28.6	16.3	165.08	0	323.31	17450000	75	200	AT1G59870.1;AT3G16340.1;AT3G16340.2;AT1G15520.2;AT3G30842.1;AT1G15520.1	AT1G59870.1	500
19.0385	19.083	19.3131	18.2923	18.2319	18.4775				-1	23	16	16	56	49.1	49.1	43.059	0	323.31	16808000	19	88	AT1G59900.1;AT1G59900.2	AT1G59900.1;AT1G59900.2	501
NaN	NaN	NaN	NaN	NaN	NaN				-1	1	1	1	4.4	4.4	4.4	36.029	0.0014853	6.759	17067	19	1	AT1G59950.1;AT1G59960.1	AT1G59950.1;AT1G59960.1	502
NaN	NaN	NaN	NaN	NaN	NaN				-1	2	2	2	7.2	7.2	7.2	63.099	0	13.891	229200	26	7	AT1G59990.2;AT1G59990.1	AT1G59990.2;AT1G59990.1	503
NaN	NaN	NaN	16.1007	16.2203	16.1348				-1	4	4	4	6.8	6.8	6.8	94.669	0	44.805	543150	41	11	AT1G60070.1;AT1G60070.2	AT1G60070.1;AT1G60070.2	504
NaN	16.8662	16.6337	15.9098	NaN	NaN				-1	3	3	3	6.4	6.4	6.4	85.987	0	49.694	606620	31	10	AT1G60200.4;AT1G60200.3;AT1G60200.2;AT1G60200.1	AT1G60200.4;AT1G60200.3;AT1G60200.2;AT1G60200.1	505
NaN	NaN	NaN	NaN	NaN	NaN				-1	2	2	2	5.4	5.4	5.4	65.169	0	14.047	75562	34	3	AT1G60420.1	AT1G60420.1	506
NaN	NaN	NaN	NaN	NaN	NaN				-1	1	1	1	5.6	5.6	5.6	37.056	0.0018464	6.6814	157730	16	5	AT1G60550.1	AT1G60550.1	507
NaN	NaN	NaN	NaN	NaN	NaN				-1	1	1	1	6.6	6.6	6.6	29.071	0.00043234	10.314	8254.2	5	1	AT1G60640.7;AT1G60640.6;AT1G60640.2;AT1G60640.1	AT1G60640.7;AT1G60640.6;AT1G60640.2;AT1G60640.1	508
NaN	NaN	NaN	NaN	NaN	NaN				-1	1	1	1	10.7	10.7	10.7	13.709	0	16.802	255860	6	4	AT1G60660.1	AT1G60660.1	509
15.8004	15.8394	16.0682	16.1601	15.8191	16.3045				-1	6	6	6	21.4	21.4	21.4	37.924	0	59.136	850740	20	20	AT1G60710.1;AT1G60680.2;AT1G60680.1;AT1G60750.1;AT1G60730.1;AT1G60690.1;AT1G60730.3	AT1G60710.1	510
14.7571	14.8763	14.6522	16.6858	16.5625	16.7424				-1	6	6	6	25.2	25.2	25.2	49.032	0	129.07	1241000	21	23	AT1G60780.1	AT1G60780.1	511
NaN	NaN	NaN	15.2622	15.1032	15.1039				-1	3	3	3	18.2	18.2	18.2	33.806	0	19.168	207450	14	7	AT1G60850.3;AT1G60850.4;AT1G60850.2;AT1G60850.1	AT1G60850.3;AT1G60850.4;AT1G60850.2;AT1G60850.1	512
NaN	NaN	NaN	NaN	NaN	NaN				-1	1	1	1	12.9	12.9	12.9	16.774	0	18.829	28360	10	1	AT1G60870.1	AT1G60870.1	513
18.4239	18.637	18.5837	18.4593	18.3304	18.2587				-1	7	7	7	24.3	24.3	24.3	66.315	0	121.03	4330000	16	48	AT1G60900.1;AT1G60830.2;AT1G60830.1	AT1G60900.1	514
NaN	NaN	NaN	NaN	NaN	NaN				-1	1	1	1	2.6	2.6	2.6	77.364	0.0025464	6.4937	20841	31	1	AT1G61010.5;AT1G61010.4;AT1G61010.3;AT1G61010.2;AT1G61010.1	AT1G61010.5;AT1G61010.4;AT1G61010.3;AT1G61010.2;AT1G61010.1	515
NaN	NaN	NaN	NaN	NaN	NaN				-1	3	3	3	6.4	6.4	6.4	71.319	0	19.382	91635	30	4	AT1G61040.3;AT1G61040.2;AT1G61040.1	AT1G61040.3;AT1G61040.2;AT1G61040.1	516
NaN	NaN	NaN	NaN	NaN	NaN				-1	2	2	2	12.4	12.4	12.4	30.942	0	13.534	215130	9	4	AT1G61250.2;AT1G61250.1	AT1G61250.2;AT1G61250.1	517
19.7907	19.4365	19.6691	19.3284	19.5508	19.5855				-1	3	3	3	24.8	24.8	24.8	23.746	0	199.08	5928300	5	17	AT1G61520.2;AT1G61520.3;AT1G61520.1	AT1G61520.2;AT1G61520.3;AT1G61520.1	518
NaN	NaN	NaN	NaN	NaN	NaN				-1	7	1	1	16.9	5.4	5.4	44.546	0.0025716	6.6214	191900	23	5	AT1G61580.1	AT1G61580.1	519
15.0614	15.3163	15.1904	NaN	NaN	NaN				-1	4	4	4	21.3	21.3	21.3	35.023	0	43.589	275150	18	12	AT1G61620.1	AT1G61620.1	520
NaN	NaN	NaN	NaN	NaN	NaN				-1	1	1	1	1.2	1.2	1.2	128.94	0	16.669	39710	55	2	AT1G61690.1	AT1G61690.1	521
NaN	NaN	NaN	NaN	NaN	NaN				-1	1	1	1	4.9	4.9	4.9	38.806	0.0025566	6.5475	9859.9	16	1	AT1G61790.2;AT1G61790.1	AT1G61790.2;AT1G61790.1	522
NaN	NaN	NaN	NaN	NaN	NaN				-1	1	1	1	4.9	4.9	4.9	45.757	0.00042123	9.0695	63016	22	3	AT1G61870.1	AT1G61870.1	523
16.0135	15.9647	16.0945	16.6034	16.6217	16.5779				-1	15	7	7	19.6	12.2	12.2	136.56	0	88.937	1572400	69	33	AT1G62020.1	AT1G62020.1	524
NaN	NaN	NaN	NaN	NaN	NaN				-1	3	3	3	9.7	9.7	9.7	50.655	0	24.82	77409	27	6	AT1G62180.1;AT1G62180.2;AT4G21990.2;AT4G21990.1	AT1G62180.1;AT1G62180.2	525
16.4982	16.8035	16.5579	17.5913	17.4547	17.5129				-1	5	5	5	34.4	34.4	34.4	36.183	0	138.59	1243300	13	17	AT1G62380.1	AT1G62380.1	526
15.7648	15.7302	15.6963	16.3874	16.345	16.3898				-1	5	5	5	14.9	14.9	14.9	82.707	0	99.772	922040	39	24	AT1G62390.1	AT1G62390.1	527
15.2354	NaN	15.7194	NaN	NaN	NaN				-1	3	3	3	6.9	6.9	6.9	101.9	0	23.433	208260	53	8	AT1G62630.1;AT1G63360.2;AT1G63360.1	AT1G62630.1	528
NaN	NaN	NaN	NaN	NaN	NaN				-1	1	1	1	3.3	3.3	3.3	64.519	0.0035945	6.2999	41796	28	2	AT1G62740.1	AT1G62740.1	529
15.8688	15.8945	15.7953	15.832	15.6085	15.8629				-1	9	9	9	23.8	23.8	23.8	86.057	0	118.72	1491000	43	34	AT1G62750.1	AT1G62750.1	530
NaN	NaN	NaN	NaN	NaN	NaN				-1	5	1	1	48.6	9.5	9.5	16.579	0	21.403	224200	11	5	AT1G62820.1	AT1G62820.1	531
18.4716	18.7655	18.7783	17.9619	17.6671	17.3898				-1	4	4	4	22.3	22.3	22.3	22.71	0	195.18	2715100	12	15	AT1G62850.4;AT1G62850.3;AT1G62850.2	AT1G62850.4;AT1G62850.3;AT1G62850.2	532
NaN	16.1627	16.2406	NaN	16.0462	15.9465				-1	5	5	5	19.6	19.6	19.6	33.597	0	45.092	867630	19	15	AT1G63000.1	AT1G63000.1	533
NaN	NaN	NaN	NaN	NaN	NaN				-1	1	1	1	7.9	7.9	7.9	24.111	0.00039651	7.6057	26325	6	1	AT1G63290.1	AT1G63290.1	534
NaN	NaN	NaN	NaN	NaN	NaN				-1	1	1	1	10.2	10.2	10.2	19.067	0.0025688	6.6118	73504	10	2	AT1G63460.1	AT1G63460.1	535
16.2877	15.6394	16.3128	NaN	15.8739	15.7113				-1	5	2	2	15.6	7.6	7.6	54.798	0	80.232	500880	25	11	AT1G63500.1	AT1G63500.1	536
16.6193	16.616	16.5939	17.4444	17.5124	17.3535				-1	12	12	11	36.7	36.7	36.5	59.314	0	277.22	3556500	32	54	AT1G63660.1;AT1G63660.2	AT1G63660.1;AT1G63660.2	537
16.0148	15.843	15.7969	17.0402	17.0259	17.0149				-1	15	15	15	34.8	34.8	34.8	99.157	0	172.58	2484800	49	59	AT1G63770.7;AT1G63770.4;AT1G63770.6;AT1G63770.5;AT1G63770.3;AT1G63770.2;AT1G63770.1	AT1G63770.7;AT1G63770.4;AT1G63770.6;AT1G63770.5;AT1G63770.3;AT1G63770.2;AT1G63770.1	538
NaN	NaN	NaN	NaN	NaN	NaN				-1	3	3	3	20.1	20.1	20.1	34.106	0	27.764	307520	16	8	AT1G63780.1	AT1G63780.1	539
14.8474	15.1973	15.2516	14.2149	14.8886	NaN				-1	5	5	5	6.7	6.7	6.7	120.15	0	62.414	490150	54	21	AT1G63810.2;AT1G63810.1	AT1G63810.2;AT1G63810.1	540
16.5783	16.5706	17.0042	17.0227	17.1296	17.7227				-1	7	7	7	25.7	25.7	25.7	52.501	0	89.257	1863900	30	31	AT1G63940.1;AT1G63940.2;AT1G63940.4;AT1G63940.3	AT1G63940.1;AT1G63940.2;AT1G63940.4;AT1G63940.3	541
NaN	NaN	NaN	NaN	NaN	NaN				-1	1	1	1	3.7	3.7	3.7	36.215	0	17.791	404680	18	6	AT1G64040.1	AT1G64040.1	542
19.3205	19.3137	19.3117	20.4525	19.765	20.4839				-1	3	3	3	6.2	6.2	6.2	72.773	0	19.215	8583400	36	14	AT1G64050.2;AT1G64050.1	AT1G64050.2;AT1G64050.1	543
NaN	NaN	NaN	NaN	NaN	NaN				-1	1	1	1	5.1	5.1	5.1	28.696	0.0004122	8.3918	227500	9	5	AT1G64090.1;AT1G64090.2	AT1G64090.1;AT1G64090.2	544
15.8562	15.8051	15.7887	15.9745	16.0945	16.1734				-1	8	7	2	29.6	25.5	8.4	53.377	0	89.489	1756400	23	35	AT1G64190.1	AT1G64190.1	545
NaN	NaN	NaN	NaN	NaN	NaN				-1	8	1	1	27.8	6.3	6.3	27.085	0	31.334	218960	12	3	AT1G64200.1;AT1G64200.2;AT1G64200.3	AT1G64200.1;AT1G64200.2;AT1G64200.3	546
15.0657	15.0349	15.3237	15.9249	15.8743	15.8393				-1	2	2	2	6.7	6.7	6.7	64.494	0	30.549	381160	30	12	AT1G64330.1	AT1G64330.1	547
16.1066	16.1804	15.7968	NaN	16.1034	15.7374				-1	4	4	4	36	36	36	19.697	0	63.817	647310	12	14	AT1G64370.1	AT1G64370.1	548
NaN	NaN	NaN	NaN	NaN	NaN				-1	1	1	1	2.7	2.7	2.7	74.75	0.0022075	6.6346	65585	31	4	AT1G64400.1	AT1G64400.1	549
NaN	NaN	NaN	15.0067	15.5524	15.3999				-1	4	4	4	14.9	14.9	14.9	38.123	0	28.292	389460	16	12	AT1G64440.1	AT1G64440.1	550
NaN	NaN	NaN	NaN	NaN	NaN				-1	2	2	2	21	21	21	14.188	0	10.642	80921	8	3	AT1G64490.1	AT1G64490.1	551
19.7143	19.5496	19.651	17.8745	17.9101	17.9369				-1	15	15	15	71.5	71.5	71.5	30.706	0	287.77	11000000	15	68	AT1G64520.1;AT5G42040.1	AT1G64520.1	552
NaN	14.8243	NaN	15.0285	14.967	15.0704				-1	6	6	6	13.7	13.7	13.7	79.643	0	49.147	454510	33	18	AT1G64550.1	AT1G64550.1	553
NaN	NaN	NaN	NaN	NaN	NaN				-1	2	2	2	1.3	1.3	1.3	284.78	0	15.201	326710	141	7	AT1G64790.1;AT1G64790.3;AT1G64790.2	AT1G64790.1;AT1G64790.3;AT1G64790.2	554
NaN	NaN	NaN	18.1372	NaN	18.2071				-1	4	4	4	15.5	15.5	15.5	60.235	0	31.727	1687700	25	11	AT1G64880.1	AT1G64880.1	555
NaN	NaN	NaN	16.0856	15.8663	15.8766				-1	4	4	4	16.6	16.6	16.6	58.604	0	80.386	811270	29	16	AT1G64900.1	AT1G64900.1	556
NaN	NaN	NaN	15.8931	15.8012	15.7624				-1	3	3	3	5.5	5.5	5.5	59.115	0	33.764	344220	28	7	AT1G64950.1;AT5G61320.1;AT1G64940.1;AT2G12190.1	AT1G64950.1;AT5G61320.1;AT1G64940.1;AT2G12190.1	557
NaN	NaN	NaN	NaN	NaN	NaN				-1	3	3	3	18.5	18.5	18.5	30.216	0	17.844	90589	16	5	AT1G64980.3;AT1G64980.1;AT1G64980.2	AT1G64980.3;AT1G64980.1;AT1G64980.2	558
16.2004	16.5283	16.6547	18.2215	17.8402	18.0953				-1	21	21	21	25.4	25.4	25.4	152.7	0	194.43	3128200	77	66	AT1G65010.1	AT1G65010.1	559
NaN	15.2402	14.5576	NaN	NaN	NaN				-1	2	2	2	11	11	11	26.748	0	32.629	132780	11	6	AT1G65090.1;AT1G65090.3;AT1G65090.2	AT1G65090.1;AT1G65090.3;AT1G65090.2	560
NaN	NaN	NaN	NaN	NaN	NaN				-1	1	1	1	8.5	8.5	8.5	28.912	0	26.811	127680	16	6	AT1G65260.2;AT1G65260.1	AT1G65260.2;AT1G65260.1	561
19.0863	19.3866	18.2157	18.4687	18.4372	18.2287				-1	6	6	6	17.9	17.9	17.9	66.5	0	52.242	3279600	29	21	AT1G65280.2;AT1G65280.1	AT1G65280.2;AT1G65280.1	562
NaN	NaN	NaN	NaN	NaN	NaN				-1	2	2	2	2.1	2.1	2.1	166.39	0	12.07	40055	79	4	AT1G65440.3;AT1G65440.2;AT1G65440.4;AT1G65440.1	AT1G65440.3;AT1G65440.2;AT1G65440.4;AT1G65440.1	563
17.2916	17.2504	17.2646	18.225	18.1661	18.1111				-1	18	18	18	46.6	46.6	46.6	45.746	0	271.79	5012100	25	61	AT1G65930.1;AT1G54340.1;AT1G54340.2;AT5G14590.1	AT1G65930.1	564
16.5644	16.5695	16.7389	17.2381	17.2622	17.2137				-1	15	15	13	43.5	43.5	38.3	56.14	0	239.49	4934800	26	66	AT1G65960.2;AT1G65960.4;AT1G65960.3;AT1G65960.1;AT3G17760.2;AT3G17760.1;AT2G02000.1	AT1G65960.2;AT1G65960.4;AT1G65960.3;AT1G65960.1	565
NaN	NaN	NaN	NaN	14.8171	14.9382				-1	4	2	2	49.4	35.8	35.8	17.414	0	31.731	173620	5	6	AT1G65970.1;AT1G60740.1	AT1G65970.1;AT1G60740.1	566
18.0867	17.7887	18.0684	18.712	18.8361	18.821				-1	12	12	10	85.8	85.8	85.8	17.428	0	320.29	7473600	6	74	AT1G65980.1;AT1G65980.2	AT1G65980.1	567
16.0094	15.8198	15.8913	14.9177	NaN	14.8464				-1	3	3	3	9.4	9.4	9.4	53.135	0	24.735	413300	21	12	AT1G65985.2;AT1G65985.1	AT1G65985.2;AT1G65985.1	568
NaN	NaN	NaN	NaN	14.8349	14.7726				-1	4	3	3	7.1	5.6	5.6	102.39	0	20.929	122520	44	7	AT1G66150.1;AT1G24650.1	AT1G66150.1	569
16.8806	16.7304	16.8172	17.0649	17.0086	17.0648				-1	5	3	1	23.3	19.1	9	39.207	0	53.383	1521000	14	17	AT1G66200.1;AT1G66200.3;AT1G66200.2;AT5G16570.2	AT1G66200.1;AT1G66200.3	570
NaN	NaN	NaN	NaN	NaN	NaN				-1	2	2	2	13.2	13.2	13.2	11.43	0	17.018	125580	6	4	AT1G66240.1	AT1G66240.1	571
17.9549	17.6265	17.7706	18.246	18.0074	18.1862				-1	8	8	2	65.8	65.8	45	16.862	0	252.68	6032400	9	53	AT5G37780.1;AT1G66410.1;AT1G66410.4;AT1G66410.3;AT5G37780.4;AT1G66410.2;AT5G37780.2;AT5G37780.3;AT3G43810.4;AT3G43810.3	AT5G37780.1;AT1G66410.1;AT1G66410.4;AT1G66410.3;AT5G37780.4;AT1G66410.2;AT5G37780.2;AT5G37780.3;AT3G43810.4;AT3G43810.3	572
NaN	NaN	NaN	NaN	NaN	NaN				-1	1	1	1	5.2	5.2	5.2	41.471	0.00039093	7.3329	130850	20	5	AT1G66430.1	AT1G66430.1	573
NaN	NaN	NaN	NaN	NaN	NaN				-1	5	5	5	27.4	27.4	27.4	39.229	0	42.614	162620	21	8	AT1G66680.1	AT1G66680.1	574
NaN	NaN	NaN	15.4328	15.3159	15.4153				-1	4	4	4	13.2	13.2	13.2	70.239	0	47.111	763950	30	10	AT1G66840.2;AT1G66840.1	AT1G66840.2;AT1G66840.1	575
NaN	NaN	NaN	NaN	NaN	NaN				-1	1	1	1	2.1	2.1	2.1	74.966	0.00041068	8.29	67500	35	4	AT1G66880.3;AT1G66880.2;AT1G66880.1	AT1G66880.3;AT1G66880.2;AT1G66880.1	576
NaN	NaN	NaN	NaN	NaN	NaN				-1	2	1	1	2.1	1.4	1.4	164.2	0	10.629	37354	67	3	AT2G36380.1;AT1G66950.1	AT2G36380.1;AT1G66950.1	577
19.017	19.1204	19.2881	19.0718	19.2607	19.2542				-1	8	8	4	56.1	56.1	38.3	20.216	0	265.7	14790000	12	64	AT1G67090.1;AT1G67090.2	AT1G67090.1	578
NaN	NaN	NaN	15.9958	15.8665	15.9851				-1	6	6	6	6.1	6.1	6.1	129.09	0	74.171	418440	54	12	AT1G67230.1	AT1G67230.1	579
14.9407	NaN	14.9133	NaN	NaN	NaN				-1	3	3	3	22.1	22.1	22.1	26.425	0	38.539	165640	14	7	AT1G67360.2;AT1G67360.1	AT1G67360.2;AT1G67360.1	580
17.9263	18.7222	17.4798	18.1046	18.5215	18.2085				-1	9	2	2	48	6.9	6.9	19.854	0	50.457	3267700	10	16	AT1G67430.1;AT1G67430.2	AT1G67430.1;AT1G67430.2	581
NaN	NaN	NaN	NaN	NaN	NaN				-1	1	1	1	5.1	5.1	5.1	49.154	0	19.861	54202	23	2	AT1G67440.1;AT1G67440.2	AT1G67440.1;AT1G67440.2	582
NaN	NaN	NaN	15.3235	15.3503	15.3983				-1	4	4	4	13.9	13.9	13.9	73.069	0	26.782	243570	30	9	AT1G67680.1;AT1G67650.1	AT1G67680.1	583
19.5578	20.1464	19.3167	19.1736	19.1034	18.6403				-1	10	10	10	45.7	45.7	45.7	26.01	0	323.31	11813000	14	53	AT1G67700.4;AT1G67700.1;AT1G67700.5;AT1G67700.2;AT1G67700.3	AT1G67700.4;AT1G67700.1;AT1G67700.5;AT1G67700.2;AT1G67700.3	584
16.0868	15.8517	16.11	15.6471	15.6056	15.4866				-1	3	3	3	20.4	20.4	20.4	35.761	0	61.388	872880	18	19	AT1G67730.1	AT1G67730.1	585
NaN	NaN	NaN	17.0978	17.1112	17.0798				-1	5	5	5	14.2	14.2	14.2	91.65	0	100.62	1005400	39	13	AT1G67930.1	AT1G67930.1	586
23.6739	23.6503	23.8512	23.4185	23.6413	23.4918				-1	62	62	61	95.3	95.3	95.1	42.247	0	323.31	739350000	27	637	AT1G68010.1;AT1G68010.2;AT1G68010.3	AT1G68010.1;AT1G68010.2;AT1G68010.3	587
16.9667	16.9171	16.6254	19.9022	19.8456	19.8813				-1	27	27	9	50.5	50.5	21.2	69.289	0	323.31	14198000	28	89	AT1G68060.1;AT4G17220.1	AT1G68060.1	588
NaN	NaN	NaN	NaN	NaN	NaN				-1	1	1	1	5.8	5.8	5.8	46.896	0.00039262	7.4106	55974	11	2	AT1G68100.2;AT1G68100.1	AT1G68100.2;AT1G68100.1	589
NaN	NaN	NaN	NaN	NaN	NaN				-1	1	1	1	2.7	2.7	2.7	42.743	0.006318	6.0303	64673	16	3	AT1G68150.1	AT1G68150.1	590
16.5213	16.399	16.5147	NaN	NaN	NaN				-1	8	8	8	33.2	33.2	33.2	45.483	0	88.455	840030	26	19	AT1G68370.1	AT1G68370.1	591
NaN	NaN	14.6126	15.7704	15.552	15.7458				-1	2	2	2	7.6	7.6	7.6	56.395	0	18.866	438990	25	12	AT1G68530.1;AT1G68530.2	AT1G68530.1;AT1G68530.2	592
NaN	NaN	NaN	NaN	NaN	NaN				-1	2	2	2	20.9	20.9	20.9	18.146	0	11.603	494910	6	5	AT1G68590.2;AT1G68590.1;AT5G15760.1	AT1G68590.2;AT1G68590.1;AT5G15760.1	593
NaN	NaN	NaN	NaN	NaN	NaN				-1	1	1	1	17.3	17.3	17.3	8.3509	0.00039841	7.6909	403700	3	5	AT1G68680.1	AT1G68680.1	594
NaN	NaN	NaN	15.3219	15.5098	15.6234				-1	11	11	11	16.1	16.1	16.1	127.2	0	240.92	882710	52	28	AT1G68790.1	AT1G68790.1	595
NaN	NaN	NaN	15.7489	15.7279	15.7313				-1	6	6	6	15.1	15.1	15.1	66.439	0	63.158	471600	31	11	AT1G68910.3;AT1G68910.2;AT1G68910.1	AT1G68910.3;AT1G68910.2;AT1G68910.1	596
NaN	17.0282	16.9068	16.1538	15.9994	NaN				-1	3	3	3	4.7	4.7	4.7	103.64	0	63.105	735870	41	13	AT1G69070.1;AT1G69070.2	AT1G69070.1;AT1G69070.2	597
NaN	NaN	15.4152	15.5849	15.6571	15.2366				-1	2	2	2	6.4	6.4	6.4	68.979	0	17.946	232360	27	9	AT1G69200.1	AT1G69200.1	598
NaN	NaN	NaN	NaN	NaN	NaN				-1	3	2	1	38.6	26.6	16.5	17.207	0	14.585	278290	10	6	AT1G69410.1	AT1G69410.1	599
NaN	NaN	NaN	NaN	NaN	NaN				-1	2	2	2	15.9	15.9	15.9	24.414	0	16.127	190160	11	6	AT1G69460.1	AT1G69460.1	600
NaN	NaN	16.3367	17.2543	NaN	17.9638				-1	1	1	1	11.8	11.8	11.8	13.65	0.00077369	7.2405	891240	4	8	AT1G69620.1	AT1G69620.1	601
16.8538	16.7293	16.7475	17.0803	16.9269	16.89				-1	12	12	11	54.9	54.9	49.3	31.405	0	275.31	3696600	19	64	AT1G69840.7;AT1G69840.6;AT1G69840.5;AT1G69840.4;AT1G69840.3;AT1G69840.2;AT1G69840.1	AT1G69840.7;AT1G69840.6;AT1G69840.5;AT1G69840.4;AT1G69840.3;AT1G69840.2;AT1G69840.1	602
NaN	NaN	NaN	NaN	NaN	NaN				-1	3	1	1	21.8	8.1	8.1	35.041	0	59.902	276380	17	3	AT1G69960.1	AT1G69960.1	603
NaN	NaN	NaN	NaN	NaN	NaN				-1	1	1	1	2.1	2.1	2.1	132.44	0.00039825	7.675	49781	57	1	AT1G70070.1	AT1G70070.1	604
NaN	NaN	NaN	14.9865	NaN	15.126				-1	4	4	4	19.1	19.1	19.1	37.14	0	50.815	201920	16	7	AT1G70310.1	AT1G70310.1	605
NaN	NaN	NaN	14.7601	14.6683	NaN				-1	3	3	3	1.8	1.8	1.8	403.61	0	21.937	140280	167	6	AT1G70320.1;AT1G55860.1	AT1G70320.1	606
NaN	NaN	NaN	NaN	NaN	NaN				-1	16	1	1	76.4	7.4	7.4	28.412	0.00041477	8.5237	222690	18	4	AT1G70410.3;AT1G70410.1;AT1G23730.2;AT1G23730.1	AT1G70410.3;AT1G70410.1	607
19.319	19.2601	19.1575	19.5786	19.587	19.5435				-1	16	16	1	70	70	6.4	30.836	0	323.31	16019000	20	91	AT1G70410.2	AT1G70410.2	608
NaN	NaN	NaN	NaN	NaN	NaN				-1	2	2	2	5.2	5.2	5.2	72	0	12.667	133920	33	4	AT1G70520.1	AT1G70520.1	609
19.2731	19.1559	19.2138	19.3279	19.4006	19.3103				-1	10	10	1	45.9	45.9	12.3	16.455	0	157.35	10641000	8	52	AT1G70600.1	AT1G70600.1	610
15.5165	15.7391	15.6944	15.6471	15.5969	15.7561				-1	6	6	6	17	17	17	62.614	0	75.077	888670	23	29	AT1G70620.7;AT1G70620.5;AT1G70620.4;AT1G70620.8;AT1G70620.6;AT1G70620.2;AT1G70620.1;AT1G70620.9;AT1G70620.3	AT1G70620.7;AT1G70620.5;AT1G70620.4;AT1G70620.8;AT1G70620.6;AT1G70620.2;AT1G70620.1;AT1G70620.9;AT1G70620.3	611
NaN	NaN	NaN	NaN	NaN	NaN				-1	5	2	2	12.8	3.8	3.8	63.481	0	10.645	95923	37	3	AT1G70730.1;AT1G70730.2;AT1G70730.3	AT1G70730.1;AT1G70730.2;AT1G70730.3	612
15.9151	16.2304	16.4502	16.3452	16.2082	16.239				-1	6	6	6	16.2	16.2	16.2	66.864	0	120.5	1077400	32	23	AT1G70770.2;AT1G70770.1	AT1G70770.2;AT1G70770.1	613
16.3915	16.2248	16.0921	16.9648	16.9915	16.9589				-1	13	13	12	67.2	67.2	63.9	37.614	0	136.22	2960400	20	51	AT1G70830.1;AT1G70830.5;AT1G70830.4;AT1G70830.3;AT1G70830.2	AT1G70830.1;AT1G70830.5;AT1G70830.4;AT1G70830.3;AT1G70830.2	614
14.5594	NaN	NaN	16.8551	15.996	16.0665				-1	6	5	5	42.7	35.8	35.8	35.57	0	53.43	1456600	15	28	AT1G70850.3;AT1G70850.1;AT1G70850.2;AT1G70840.1	AT1G70850.3;AT1G70850.1;AT1G70850.2	615
NaN	NaN	NaN	NaN	NaN	NaN				-1	1	1	1	19	19	19	17.889	0	15.91	123820	11	3	AT1G70890.1	AT1G70890.1	616
NaN	NaN	NaN	NaN	NaN	NaN				-1	1	1	1	2	2	2	69.465	0.00042301	9.3447	110380	30	4	AT1G70940.1	AT1G70940.1	617
NaN	NaN	NaN	NaN	NaN	NaN				-1	2	2	2	14.2	14.2	14.2	28.331	0	42.755	322650	9	7	AT1G71100.1	AT1G71100.1	618
NaN	NaN	NaN	NaN	NaN	NaN				-1	1	1	1	0.9	0.9	0.9	181.8	0.001149	7.1195	10460	84	1	AT1G71220.1;AT1G71220.2;AT1G71220.3	AT1G71220.1;AT1G71220.2;AT1G71220.3	619
NaN	NaN	NaN	NaN	NaN	NaN				-1	1	1	1	2.8	2.8	2.8	80.937	0	34.533	483980	41	6	AT1G71270.1	AT1G71270.1	620
14.9368	15.3307	14.9867	NaN	NaN	NaN				-1	4	4	4	10.2	10.2	10.2	65.674	0	25.58	254190	27	10	AT1G71350.1	AT1G71350.1	621
NaN	NaN	NaN	NaN	NaN	NaN				-1	3	3	3	6.2	6.2	6.2	98.763	0	50.079	524710	46	6	AT1G71410.2;AT1G71410.1	AT1G71410.2;AT1G71410.1	622
NaN	NaN	NaN	NaN	NaN	NaN				-1	1	1	1	6.6	6.6	6.6	31.727	0	34.481	249400	18	6	AT1G71500.1	AT1G71500.1	623
19.0256	18.9372	19.0335	18.479	18.5186	18.4715				-1	16	16	16	35.9	35.9	35.9	85.673	0	244.47	5794800	35	67	AT1G71820.1;AT1G71820.2	AT1G71820.1;AT1G71820.2	624
NaN	NaN	NaN	NaN	NaN	NaN				-1	7	1	1	18.1	3.4	3.4	69.021	0.0007728	7.232	130730	20	2	AT1G71830.1;AT1G34210.2;AT1G34210.1;AT2G13800.4;AT2G13800.2;AT2G13800.3;AT2G13800.1;AT2G13790.1	AT1G71830.1;AT1G34210.2;AT1G34210.1	625
NaN	NaN	14.6738	15.289	15.4152	15.2584				-1	5	5	5	20.4	20.4	20.4	43.791	0	49.382	441080	14	15	AT1G71840.1	AT1G71840.1	626
NaN	15.3467	15.1555	NaN	NaN	NaN				-1	3	3	3	14.7	14.7	14.7	37.798	0	31.884	282870	16	9	AT1G71860.1;AT1G71860.3;AT1G71860.2	AT1G71860.1;AT1G71860.3;AT1G71860.2	627
NaN	NaN	NaN	NaN	NaN	NaN				-1	1	1	1	4.3	4.3	4.3	54.858	0.0032479	6.3854	57111	18	3	AT1G71880.1	AT1G71880.1	628
NaN	NaN	NaN	NaN	NaN	NaN				-1	2	2	2	6	6	6	65.495	0	13.137	51789	30	4	AT1G72090.1	AT1G72090.1	629
17.0834	16.7707	17.0427	15.9653	15.8489	15.8567				-1	6	6	6	13.8	13.8	13.8	64.046	0	59.158	1530400	33	24	AT1G72150.1	AT1G72150.1	630
18.7293	18.4922	18.4772	16.6731	16.7749	16.9324				-1	13	13	12	32.9	32.9	30.8	56.104	0	323.31	5400900	27	51	AT1G72160.1	AT1G72160.1	631
19.9172	19.9295	20.1268	19.8869	19.9621	20.055				-1	11	11	11	48.6	48.6	48.6	31.981	0	231.95	13842000	14	65	AT1G72370.2;AT1G72370.1;AT3G04770.2;AT3G04770.1	AT1G72370.2;AT1G72370.1	632
NaN	NaN	NaN	NaN	NaN	NaN				-1	2	2	2	2.5	2.5	2.5	128.01	0	17.245	49011	57	2	AT1G72410.2;AT1G72410.1	AT1G72410.2;AT1G72410.1	633
18.2874	18.1738	18.2933	15.4437	15.6797	13.3852				-1	18	18	18	36.6	36.6	36.6	84.533	0	282.24	4853700	32	58	AT1G72500.1;AT1G72500.2;AT1G72500.3	AT1G72500.1;AT1G72500.2;AT1G72500.3	634
NaN	NaN	NaN	NaN	NaN	NaN				-1	4	4	4	12	12	12	65.959	0	52.377	204650	38	9	AT1G72550.2;AT1G72550.1	AT1G72550.2;AT1G72550.1	635
NaN	NaN	NaN	NaN	NaN	NaN				-1	1	1	1	4.2	4.2	4.2	38.671	0	14.074	92966	22	5	AT1G72680.1	AT1G72680.1	636
NaN	NaN	NaN	NaN	NaN	NaN				-1	2	2	2	15.4	15.4	15.4	19.878	0	15.345	646110	8	7	AT1G72750.1	AT1G72750.1	637
NaN	15.2824	15.071	NaN	NaN	NaN				-1	3	3	3	30.9	30.9	30.9	17.568	0	23.111	242790	9	8	AT1G72930.2;AT1G72930.1;AT1G72910.1	AT1G72930.2;AT1G72930.1;AT1G72910.1	638
16.1383	16.458	16.4559	15.9011	NaN	NaN				-1	2	2	2	11.8	11.8	11.8	22.691	0	41.851	513760	9	11	AT1G73030.1;AT1G17730.1	AT1G73030.1;AT1G17730.1	639
NaN	NaN	NaN	NaN	NaN	NaN				-1	1	1	1	3.8	3.8	3.8	65.507	0.0014886	6.7863	2544200	27	7	AT1G73066.1	AT1G73066.1	640
17.8242	17.7874	17.9195	NaN	NaN	NaN				-1	12	12	12	19.2	19.2	19.2	122.9	0	161.14	1861100	46	33	AT1G73080.1	AT1G73080.1	641
14.9084	NaN	14.9757	NaN	NaN	NaN				-1	3	3	3	10.6	10.6	10.6	48.325	0	22.571	159010	27	7	AT1G73110.1;AT1G73110.2	AT1G73110.1;AT1G73110.2	642
16.733	16.7619	16.4918	16.7677	16.5199	16.47				-1	4	4	4	25.5	25.5	25.5	18.004	0	29.632	1306200	6	23	AT1G73230.1	AT1G73230.1	643
18.347	18.2632	18.2978	18.2158	18.1532	18.0939				-1	30	30	30	41.4	41.4	41.4	106.87	0	323.31	13733000	53	140	AT1G73370.1;AT1G73370.3;AT1G73370.2	AT1G73370.1;AT1G73370.3;AT1G73370.2	644
NaN	NaN	NaN	NaN	NaN	NaN				-1	1	1	1	4	4	4	88.608	0	13.037	216000	39	7	AT1G73430.2;AT1G73430.1	AT1G73430.2;AT1G73430.1	645
NaN	14.956	NaN	15.663	NaN	15.697				-1	2	2	2	3.4	3.4	3.4	129.23	0	50.395	200010	61	8	AT1G73450.1;AT1G73460.2;AT1G73460.1	AT1G73450.1;AT1G73460.2;AT1G73460.1	646
17.1237	17.2299	17.283	18.1371	18.2456	18.2175				-1	12	11	11	34.3	31.5	31.5	57.843	0	244.56	6576400	28	50	AT1G73600.2;AT1G73600.1	AT1G73600.2;AT1G73600.1	647
NaN	NaN	NaN	NaN	NaN	NaN				-1	1	1	1	3.3	3.3	3.3	57.723	0.004984	6.17	25491	29	2	AT1G73720.1	AT1G73720.1	648
16.4117	17.1474	17.0536	16.4358	16.074	16.1433				-1	2	2	2	20.5	20.5	20.5	17.082	0	16.198	1157600	7	13	AT1G73940.1	AT1G73940.1	649
NaN	NaN	NaN	NaN	NaN	NaN				-1	2	2	2	6.3	6.3	6.3	51.474	0	14.879	183500	21	6	AT1G74030.1	AT1G74030.1	650
NaN	NaN	NaN	NaN	NaN	NaN				-1	5	1	1	14.3	2.9	2.9	68.135	0.0004095	8.216	30223	36	3	AT1G74040.1	AT1G74040.1	651
15.3826	15.2404	15.4609	NaN	NaN	NaN				-1	8	1	1	23.6	7.7	7.7	26.008	0	25.615	455090	11	9	AT1G74060.1;AT1G74050.1	AT1G74060.1;AT1G74050.1	652
NaN	NaN	NaN	15.5798	15.7318	NaN				-1	2	2	1	9.7	9.7	6.3	40.464	0	22.907	253480	22	7	AT1G74090.1	AT1G74090.1	653
NaN	NaN	NaN	NaN	NaN	NaN				-1	2	1	1	6.8	3.3	3.3	39.219	0.0076628	5.9653	16010	20	1	AT1G74100.1	AT1G74100.1	654
NaN	NaN	NaN	NaN	NaN	NaN				-1	1	1	1	6.1	6.1	6.1	45.021	0.0076442	5.9564	409040	18	2	AT1G74210.1	AT1G74210.1	655
NaN	NaN	NaN	NaN	NaN	NaN				-1	1	1	1	5.5	5.5	5.5	28.728	0.00077882	7.2972	108220	6	3	AT1G74230.1	AT1G74230.1	656
NaN	14.964	14.8518	NaN	NaN	NaN				-1	2	2	2	7	7	7	72.475	0	15.526	200730	25	8	AT1G74250.1	AT1G74250.1	657
14.5525	NaN	NaN	14.7524	NaN	NaN				-1	4	4	4	5.1	5.1	5.1	153.95	0	27.085	268550	74	10	AT1G74260.1	AT1G74260.1	658
19.1323	19.2248	19.1982	18.7735	18.7912	18.6669				-1	18	18	18	46.3	46.3	46.3	51.837	0	323.31	10134000	25	100	AT1G74470.1	AT1G74470.1	659
NaN	NaN	NaN	15.7106	15.6766	15.5611				-1	3	3	3	11.2	11.2	11.2	65.199	0	49.5	453350	22	11	AT1G74690.1	AT1G74690.1	660
NaN	NaN	NaN	NaN	NaN	NaN				-1	1	1	1	3.8	3.8	3.8	53.977	0.001843	6.6491	8830.3	24	1	AT1G74920.2;AT1G74920.1	AT1G74920.2;AT1G74920.1	661
NaN	NaN	NaN	NaN	NaN	NaN				-1	2	2	2	8.1	8.1	8.1	57.599	0	12.544	43882	15	2	AT1G74960.3;AT1G74960.2;AT1G74960.1	AT1G74960.3;AT1G74960.2;AT1G74960.1	662
NaN	NaN	NaN	NaN	NaN	NaN				-1	1	1	1	8.2	8.2	8.2	22.577	0	25.752	194700	9	6	AT1G74970.1	AT1G74970.1	663
NaN	NaN	NaN	NaN	NaN	NaN				-1	2	2	2	16.9	16.9	16.9	23.407	0	16.671	156210	17	7	AT1G75270.1	AT1G75270.1	664
17.1506	17.5765	17.642	17.2644	17.1518	16.7575				-1	5	5	5	47.2	47.2	47.2	16.033	0	118.3	4308700	9	44	AT1G75350.1	AT1G75350.1	665
NaN	NaN	NaN	NaN	NaN	NaN				-1	2	2	2	8.6	8.6	8.6	28.677	0	12.895	162990	12	5	AT1G75560.2;AT1G75560.1	AT1G75560.2;AT1G75560.1	666
NaN	NaN	NaN	NaN	NaN	NaN				-1	1	1	1	13.3	13.3	13.3	22.286	0.001492	6.8331	162090	9	3	AT1G75670.2;AT1G75670.1	AT1G75670.2;AT1G75670.1	667
NaN	NaN	NaN	NaN	NaN	NaN				-1	1	1	1	13.4	13.4	13.4	10.645	0	12.738	72137	5	3	AT1G75750.2;AT1G75750.1	AT1G75750.2;AT1G75750.1	668
NaN	NaN	NaN	NaN	NaN	NaN				-1	11	2	1	34	8.9	4.3	50.217	0	10.785	74488	21	5	AT1G75780.1	AT1G75780.1	669
NaN	NaN	NaN	NaN	NaN	NaN				-1	1	1	1	9.4	9.4	9.4	17.857	0.00042845	10.007	49156	7	2	AT1G75950.1	AT1G75950.1	670
17.3245	17.3918	17.5053	15.9438	16.0521	15.5836				-1	13	5	5	29.2	13.6	13.6	55.591	0	51.081	1553100	32	21	AT1G75990.1	AT1G75990.1	671
NaN	NaN	NaN	NaN	NaN	NaN				-1	1	1	1	2.9	2.9	2.9	37.382	0.0025538	6.5361	23006	20	2	AT1G76010.2;AT1G76010.1	AT1G76010.2;AT1G76010.1	672
NaN	NaN	NaN	NaN	NaN	NaN				-1	29	1	1	75.5	6.6	6.6	54.107	0.004298	6.2379	7596.9	24	1	AT1G76030.1	AT1G76030.1	673
NaN	NaN	NaN	NaN	NaN	NaN				-1	3	1	1	6.3	3	3	57.578	0	24.589	116740	25	5	AT1G76040.3;AT1G76040.2;AT1G76040.4;AT1G76040.1	AT1G76040.3;AT1G76040.2	674
NaN	NaN	NaN	NaN	NaN	NaN				-1	1	1	1	6.3	6.3	6.3	33.684	0	13.469	57534	17	2	AT1G76080.1	AT1G76080.1	675
NaN	NaN	NaN	NaN	16.3978	16.146				-1	2	2	1	5.2	5.2	2.2	60.04	0	36.041	363930	26	7	AT1G76160.1	AT1G76160.1	676
17.4298	17.2633	NaN	16.704	16.8003	16.9015				-1	4	4	3	24.3	24.3	24.3	20.786	0	104.11	1257300	11	15	AT1G76180.2;AT1G76180.1	AT1G76180.2;AT1G76180.1	677
NaN	NaN	NaN	NaN	NaN	NaN				-1	1	1	1	2.1	2.1	2.1	89.108	0.00042735	9.9052	107710	44	5	AT1G76390.2;AT1G76390.1	AT1G76390.2;AT1G76390.1	678
NaN	NaN	NaN	NaN	NaN	NaN				-1	2	2	2	19.2	19.2	19.2	19.452	0	15.879	406510	7	7	AT1G76405.2	AT1G76405.2	679
NaN	NaN	NaN	NaN	NaN	NaN				-1	4	2	2	9.2	4.7	4.7	67.558	0	13.852	97194	35	3	AT1G76550.1	AT1G76550.1	680
NaN	NaN	NaN	NaN	NaN	NaN				-1	1	1	1	10.7	10.7	10.7	20.112	0.000777	7.2747	33552	9	1	AT1G76650.3;AT1G76650.1	AT1G76650.3;AT1G76650.1	681
25.1107	25.2557	24.9358	24.9911	24.9429	24.9318				-1	8	8	8	10.7	10.7	10.7	142.11	0	90.761	307900000	58	46	AT1G76810.1;AT1G76720.1;AT1G76720.2	AT1G76810.1	682
18.636	18.6618	18.5565	18.1371	18.2529	18.1793				-1	19	19	14	27.4	27.4	20.3	121.9	0	323.31	7643900	61	86	AT1G76850.1	AT1G76850.1	683
NaN	NaN	NaN	NaN	NaN	NaN				-1	1	1	1	3.2	3.2	3.2	67.878	0.00043178	10.25	171320	17	5	AT1G76880.1	AT1G76880.1	684
NaN	NaN	NaN	NaN	NaN	NaN				-1	2	2	2	4.5	4.5	4.5	65.836	0	12.067	56485	22	2	AT1G76890.2	AT1G76890.2	685
15.4761	15.5145	15.6172	16.1548	15.7853	15.9238				-1	8	8	8	29.1	29.1	29.1	50.402	0	56.843	836810	28	24	AT1G76990.5;AT1G76990.4;AT1G76990.3;AT1G76990.2;AT1G76990.1	AT1G76990.5;AT1G76990.4;AT1G76990.3;AT1G76990.2;AT1G76990.1	686
NaN	NaN	NaN	NaN	NaN	NaN				-1	1	1	1	5.3	5.3	5.3	42.826	0.001487	6.7725	21523	15	1	AT1G77020.1	AT1G77020.1	687
NaN	15.9764	15.6644	NaN	15.1116	NaN				-1	5	5	5	6.7	6.7	6.7	93.502	0	88.327	498070	41	14	AT1G77030.1	AT1G77030.1	688
18.2048	18.0585	18.2634	18.6307	18.5208	18.5946				-1	20	20	20	71.5	71.5	71.5	41.178	0	323.31	15132000	20	122	AT1G77120.1	AT1G77120.1	689
NaN	NaN	NaN	NaN	NaN	NaN				-1	3	3	3	6.3	6.3	6.3	64.941	0	16.121	73388	32	3	AT1G77140.1	AT1G77140.1	690
16.691	NaN	16.9071	16.9166	16.7299	16.9613				-1	5	5	5	14.7	14.7	14.7	57.726	0	46.781	1030900	27	15	AT1G77180.3;AT1G77180.2;AT1G77180.1	AT1G77180.3;AT1G77180.2;AT1G77180.1	691
NaN	NaN	NaN	NaN	NaN	NaN				-1	1	1	1	7.2	7.2	7.2	34.946	0.00041528	8.562	34499	15	2	AT1G77330.1	AT1G77330.1	692
NaN	NaN	NaN	15.0166	15.2626	14.7571				-1	6	6	6	4.6	4.6	4.6	231.43	0	38.381	232110	109	10	AT1G77460.4;AT1G77460.3;AT1G77460.2;AT1G77460.1	AT1G77460.4;AT1G77460.3;AT1G77460.2;AT1G77460.1	693
NaN	NaN	NaN	NaN	NaN	NaN				-1	2	2	2	8.1	8.1	8.1	56.364	0	11.369	39427	33	4	AT1G77510.1	AT1G77510.1	694
16.7352	16.7284	16.1932	16.7631	16.8251	16.732				-1	6	6	6	16.8	16.8	16.8	76.175	0	62.402	1567800	29	25	AT1G77590.1;AT1G77590.2	AT1G77590.1;AT1G77590.2	695
NaN	NaN	NaN	NaN	NaN	NaN				-1	2	2	2	4.8	4.8	4.8	103.04	0	38.899	47171	45	4	AT1G77760.1	AT1G77760.1	696
NaN	NaN	NaN	NaN	NaN	NaN				-1	2	2	2	8.1	8.1	8.1	20.613	0	27.202	100300	8	3	AT1G77765.2;AT1G77765.3;AT1G77765.1;AT1G77765.4	AT1G77765.2;AT1G77765.3;AT1G77765.1;AT1G77765.4	697
15.9292	16.2791	NaN	15.8884	15.9142	15.2204				-1	6	3	3	15.8	10.8	10.8	48.64	0	69.027	650770	26	13	AT1G77840.1	AT1G77840.1	698
18.0353	18.0174	17.5234	17.8546	18.1882	18.0121				-1	3	1	1	41.1	17	17	12.29	0	115.17	2027000	5	12	AT1G77940.1;AT1G36240.1	AT1G77940.1;AT1G36240.1	699
NaN	NaN	NaN	NaN	NaN	NaN				-1	1	1	1	3.3	3.3	3.3	37.215	0.0035958	6.3	21578	21	1	AT1G78050.1	AT1G78050.1	700
17.0806	16.7614	17.0639	17.5983	17.5677	17.6675				-1	12	7	7	46.3	30.5	30.5	29.161	0	122.3	2911900	15	34	AT1G78300.1	AT1G78300.1	701
NaN	NaN	NaN	NaN	15.2405	15.3311				-1	3	3	3	20.7	20.7	20.7	25.006	0	28.915	252140	16	7	AT1G78370.1	AT1G78370.1	702
17.4343	17.4002	17.4549	17.128	17.1559	17.188				-1	17	17	11	41	41	26.5	75.371	0	323.31	6358700	38	97	AT1G78570.1	AT1G78570.1	703
NaN	NaN	NaN	14.7457	NaN	14.7869				-1	2	2	2	5	5	5	96.603	0	16.841	157970	53	6	AT1G78610.1	AT1G78610.1	704
18.0143	17.8855	18.1119	18.4554	18.4606	18.4897				-1	4	4	4	29.9	29.9	29.9	26.788	0	215.43	4162400	14	28	AT1G78630.1	AT1G78630.1	705
NaN	NaN	NaN	NaN	NaN	NaN				-1	1	1	1	5.5	5.5	5.5	50.342	0.0042934	6.2232	10376	26	1	AT1G78830.1;AT1G78820.1	AT1G78830.1;AT1G78820.1	706
14.9609	14.8605	NaN	NaN	15.099	15.2216				-1	3	3	3	50	50	50	13.617	0	33.542	260060	7	11	AT1G78870.4;AT1G78870.2;AT1G16890.1;AT1G78870.1;AT1G16890.2;AT1G16890.3;AT1G78870.3	AT1G78870.4;AT1G78870.2;AT1G16890.1;AT1G78870.1;AT1G16890.2;AT1G16890.3	707
NaN	NaN	NaN	16.8787	16.8712	16.8899				-1	2	2	2	9.8	9.8	9.8	50.104	0	34.953	771750	23	9	AT1G78880.1	AT1G78880.1	708
18.673	18.6346	18.6919	20.5735	20.5066	20.4896				-1	32	32	32	65	65	65	68.812	0	323.31	52677000	38	190	AT1G78900.2;AT1G78900.1	AT1G78900.2;AT1G78900.1	709
NaN	NaN	NaN	NaN	NaN	NaN				-1	1	1	1	10	10	10	14.586	0.001124	6.8726	66066	7	3	AT1G79040.1	AT1G79040.1	710
NaN	NaN	NaN	NaN	NaN	NaN				-1	2	2	2	28.3	28.3	28.3	14.883	0	13.61	71276	7	3	AT1G79070.2;AT1G79070.1	AT1G79070.2;AT1G79070.1	711
NaN	NaN	NaN	NaN	NaN	NaN				-1	1	1	1	5.7	5.7	5.7	19.087	0.0039497	6.2702	82868	7	3	AT1G79200.1	AT1G79200.1	712
NaN	NaN	NaN	15.2787	NaN	15.6167				-1	5	5	5	19.1	19.1	19.1	45.483	0	32.901	272340	22	7	AT1G79340.1;AT1G79330.1	AT1G79340.1	713
NaN	NaN	NaN	NaN	NaN	NaN				-1	3	3	3	12	12	12	43.73	0	27.372	174870	15	7	AT1G79380.1	AT1G79380.1	714
NaN	NaN	15.2251	16.1802	16.2173	16.3112				-1	4	3	3	17.7	14.3	14.3	54.193	0	35.732	538760	20	13	AT1G79470.1	AT1G79470.1	715
16.467	16.5617	16.4843	16.8085	15.9882	16.1286				-1	6	5	5	22.5	19.9	19.9	44.83	0	155.63	1444200	24	27	AT1G79530.1;AT1G16300.1	AT1G79530.1	716
17.5156	17.3792	17.3987	18.562	18.5891	18.6247				-1	17	17	16	67.3	67.3	67.3	42.131	0	317.21	12396000	25	103	AT1G79550.2;AT1G79550.1	AT1G79550.2;AT1G79550.1	717
NaN	NaN	16.4097	16.9923	17.0657	17.1518				-1	7	7	7	14	14	14	86.856	0	56.414	1190200	47	19	AT1G79690.2;AT1G79690.1	AT1G79690.2;AT1G79690.1	718
NaN	NaN	NaN	NaN	NaN	NaN				-1	2	2	2	7.9	7.9	7.9	71.16	0	46.399	256840	34	6	AT1G79750.1	AT1G79750.1	719
NaN	17.5669	NaN	16.4999	NaN	NaN				-1	2	2	2	18.1	18.1	18.1	16.282	0	71.907	1038300	9	8	AT1G79850.1	AT1G79850.1	720
NaN	16.5087	16.2236	17.1288	17.0994	NaN				-1	2	2	2	19.4	19.4	19.4	32.197	0	81.067	915340	12	10	AT1G79870.2;AT1G79870.1	AT1G79870.2;AT1G79870.1	721
15.8473	NaN	15.7786	16.0892	16.2065	16.2112				-1	17	3	3	35.5	9.4	9.4	81.775	0	40.944	828900	36	14	AT1G79920.4;AT1G79920.3;AT1G79920.2;AT1G79920.1	AT1G79920.4;AT1G79920.3;AT1G79920.2;AT1G79920.1	722
16.2079	16.3912	16.4818	16.8798	16.8715	16.905				-1	20	20	6	39.3	39.3	15	87.316	0	218.3	4437600	44	79	AT1G79930.2;AT1G79930.1	AT1G79930.2;AT1G79930.1	723
14.9304	14.8712	14.8362	15.8512	15.8606	15.8481				-1	5	5	5	15	15	15	66.487	0	85.987	875700	32	22	AT1G79940.4;AT1G79940.3;AT1G79940.2;AT1G79940.1	AT1G79940.4;AT1G79940.3;AT1G79940.2;AT1G79940.1	724
NaN	NaN	NaN	15.2878	14.5443	14.5368				-1	3	2	2	6.4	3.5	3.5	103.01	0	16.128	167100	46	7	AT1G79990.2;AT1G79990.1	AT1G79990.2;AT1G79990.1	725
NaN	NaN	NaN	NaN	NaN	NaN				-1	1	1	1	5.8	5.8	5.8	52.281	0.00041017	8.2624	103580	22	3	AT1G80030.4;AT1G80030.3;AT1G80030.2;AT1G80030.1	AT1G80030.4;AT1G80030.3;AT1G80030.2;AT1G80030.1	726
15.5299	15.3531	15.7653	15.4712	15.3245	15.3916				-1	11	11	11	8.3	8.3	8.3	275.42	0	82.875	1221900	123	39	AT1G80070.1;AT4G38780.1	AT1G80070.1	727
NaN	NaN	NaN	NaN	NaN	NaN				-1	1	1	1	12.9	12.9	12.9	18.583	0	10.821	245650	12	6	AT1G80230.1;AT3G15640.2;AT3G15640.1	AT1G80230.1;AT3G15640.2;AT3G15640.1	728
NaN	NaN	NaN	14.8537	15.142	NaN				-1	4	4	4	12.6	12.6	12.6	67.281	0	25.911	205930	37	8	AT1G80270.5;AT1G80270.4;AT1G80270.3;AT1G80270.2;AT1G80270.1	AT1G80270.5;AT1G80270.4;AT1G80270.3;AT1G80270.2;AT1G80270.1	729
NaN	NaN	NaN	NaN	NaN	NaN				-1	2	2	2	8.9	8.9	8.9	43.761	0	14.95	217240	17	4	AT1G80360.4;AT1G80360.3;AT1G80360.2;AT1G80360.1	AT1G80360.4;AT1G80360.3;AT1G80360.2;AT1G80360.1	730
16.5252	16.6437	16.6369	16.0055	16.0465	15.6485				-1	15	15	15	26.3	26.3	26.3	102.15	0	216.83	2777300	52	65	AT1G80410.1;AT1G80410.2	AT1G80410.1;AT1G80410.2	731
NaN	NaN	NaN	NaN	NaN	NaN				-1	1	1	1	3.3	3.3	3.3	52.483	0.00077131	7.2041	84571	27	4	AT1G80460.2;AT1G80460.1	AT1G80460.2;AT1G80460.1	732
17.8428	17.9482	18.0362	17.3164	17.6368	17.5548				-1	8	8	8	28.2	28.2	28.2	49.487	0	101.02	2586100	21	33	AT1G80480.1	AT1G80480.1	733
15.93	15.5064	NaN	16.0473	15.8258	15.8973				-1	4	4	4	40	40	40	15.264	0	41.991	736090	7	17	AT1G80500.2;AT1G80500.1	AT1G80500.2;AT1G80500.1	734
NaN	NaN	NaN	NaN	NaN	NaN				-1	1	1	1	4.3	4.3	4.3	47.4	0.0011228	6.8692	69286	24	3	AT1G80620.1	AT1G80620.1	735
NaN	NaN	NaN	NaN	NaN	NaN				-1	1	1	1	6.4	6.4	6.4	40.076	0.0014848	6.7552	90181	17	3	AT1G80640.2;AT1G80640.1	AT1G80640.2;AT1G80640.1	736
16.9172	17.0132	16.9958	16.7649	16.5737	16.917				-1	4	4	4	23.1	23.1	23.1	28.344	0	51.365	1031500	16	18	AT1G80750.1	AT1G80750.1	737
NaN	16.6264	NaN	NaN	16.942	NaN				-1	5	5	5	7	7	7	104.02	0	33.135	499880	42	9	AT1G80930.1	AT1G80930.1	738
NaN	NaN	NaN	NaN	NaN	NaN				-1	2	2	2	8.7	8.7	8.7	43.678	0	15.898	119110	23	6	AT1G80950.2;AT1G80950.1	AT1G80950.2;AT1G80950.1	739
19.9852	20.2179	20.0998	19.7026	19.653	19.6577				-1	13	11	11	37.3	34.5	34.5	42.327	0	196.78	12804000	21	63	AT2G01140.1	AT2G01140.1	740
20.234	20.3317	20.5227	19.9732	20.0527	19.8888				-1	13	8	8	55.8	42.1	42.1	28.171	0	323.31	15092000	14	50	AT2G01250.1;AT2G01250.2	AT2G01250.1;AT2G01250.2	741
NaN	NaN	NaN	NaN	NaN	NaN				-1	1	1	1	9.1	9.1	9.1	28.516	0.00040355	7.8975	61799	9	2	AT2G01290.1	AT2G01290.1	742
NaN	NaN	NaN	15.2291	15.3264	15.2659				-1	7	7	6	27.5	27.5	24.9	42.793	0	46.778	557270	23	17	AT2G01470.1	AT2G01470.1	743
15.8066	15.8349	16.1011	17.7023	17.8849	17.9126				-1	5	5	5	31.4	31.4	31.4	32.028	0	77.583	1934900	13	26	AT2G01490.2;AT2G01490.1	AT2G01490.2;AT2G01490.1	744
NaN	NaN	NaN	NaN	NaN	NaN				-1	1	1	1	8.9	8.9	8.9	20.085	0	13.375	190390	14	5	AT2G01540.1	AT2G01540.1	745
NaN	NaN	NaN	NaN	NaN	NaN				-1	1	1	1	4	4	4	63.628	0.0014815	6.7293	56060	24	1	AT2G01600.1	AT2G01600.1	746
NaN	NaN	NaN	NaN	NaN	NaN				-1	2	2	2	9.4	9.4	9.4	51.063	0	10.891	30143	24	2	AT2G01650.1;AT2G01650.2;AT2G01650.3	AT2G01650.1;AT2G01650.2;AT2G01650.3	747
NaN	NaN	NaN	14.7719	NaN	14.755				-1	12	4	4	26.1	11.6	11.6	69.772	0	31.819	149440	33	6	AT2G01750.1;AT2G01750.2	AT2G01750.1;AT2G01750.2	748
NaN	NaN	NaN	NaN	NaN	NaN				-1	1	1	1	11.7	11.7	11.7	11.74	0.005988	6.0626	44881	7	2	AT2G02050.1	AT2G02050.1	749
15.7223	16.5122	16.8918	NaN	15.3497	14.9896				-1	2	2	2	33.8	33.8	33.8	8.524	0	68.002	593250	3	13	AT2G02100.1	AT2G02100.1	750
NaN	NaN	NaN	NaN	NaN	NaN				-1	1	1	1	31.2	31.2	31.2	8.544	0.00039479	7.4929	84072	2	1	AT2G02130.1	AT2G02130.1	751
NaN	NaN	NaN	NaN	NaN	NaN				-1	1	1	1	12.6	12.6	12.6	21.578	0	21.143	174500	11	6	AT2G02390.2;AT2G02390.4;AT2G02390.1;AT2G02390.3	AT2G02390.2;AT2G02390.4;AT2G02390.1;AT2G02390.3	752
NaN	NaN	15.2465	15.7685	15.828	15.7209				-1	5	5	5	8.1	8.1	8.1	134.62	0	36.253	536810	68	18	AT2G02560.2;AT2G02560.1	AT2G02560.2;AT2G02560.1	753
NaN	NaN	NaN	NaN	NaN	NaN				-1	1	1	1	2.7	2.7	2.7	63.452	0.0050018	6.2001	154730	30	1	AT2G03220.1	AT2G03220.1	754
14.6196	NaN	NaN	NaN	14.7321	14.6777				-1	4	4	4	35	35	35	25.921	0	34.724	242710	15	10	AT2G03430.1	AT2G03430.1	755
NaN	NaN	NaN	NaN	NaN	NaN				-1	2	2	2	7.3	7.3	7.3	40.596	0	14.162	217810	18	7	AT2G03510.1	AT2G03510.1	756
16.3504	NaN	16.6579	NaN	NaN	NaN				-1	1	1	1	14.3	14.3	14.3	11.92	0	25.945	755170	5	8	AT2G03680.3;AT2G03680.2;AT2G03680.1	AT2G03680.3;AT2G03680.2;AT2G03680.1	757
NaN	NaN	NaN	15.5972	15.4883	15.5356				-1	3	3	3	15	15	15	37.139	0	42.159	384370	18	11	AT2G03760.1	AT2G03760.1	758
16.8231	16.7838	16.8543	16.5527	16.6519	16.4187				-1	4	4	4	11.8	11.8	11.8	59.293	0	36.378	1374300	28	16	AT2G03820.1	AT2G03820.1	759
17.0213	16.8188	16.8726	16.8352	16.7362	16.9116				-1	12	12	11	29.6	29.6	27.8	88.255	0	161.59	3240100	47	53	AT2G04030.2;AT2G04030.1	AT2G04030.2;AT2G04030.1	760
17.3207	17.9787	18.0268	16.8793	16.3978	NaN				-1	9	9	9	16.5	16.5	16.5	78.342	0	99.088	1481200	32	21	AT2G04350.2;AT2G04350.1	AT2G04350.2;AT2G04350.1	761
19.2579	19.3743	19.1733	18.4083	18.6265	18.5592				-1	5	5	5	28.6	28.6	28.6	16.036	0	63.577	4801200	4	20	AT3G10610.1;AT2G05220.2;AT2G05220.1;AT5G04800.4;AT5G04800.3;AT5G04800.2;AT5G04800.1;AT2G04390.1	AT3G10610.1;AT2G05220.2;AT2G05220.1;AT5G04800.4;AT5G04800.3;AT5G04800.2;AT5G04800.1;AT2G04390.1	762
NaN	NaN	NaN	NaN	NaN	NaN				-1	1	1	1	4	4	4	44.577	0.00039857	7.6922	86919	27	3	AT2G04400.1	AT2G04400.1	763
NaN	NaN	NaN	NaN	NaN	NaN				-1	1	1	1	28.8	28.8	28.8	8.059	0	19.451	384780	3	3	AT2G04410.1	AT2G04410.1	764
20.6261	21.0348	20.8959	19.9376	20.09	19.4684				-1	7	7	4	44.1	44.1	26.2	16.637	0	128.07	17289000	7	54	AT2G04520.1	AT2G04520.1	765
15.897	15.8764	15.9557	15.742	15.7527	15.7048				-1	4	4	4	13.4	13.4	13.4	74.784	0	46.081	860330	36	20	AT2G04842.2;AT2G04842.1	AT2G04842.2;AT2G04842.1	766
17.8554	NaN	17.9576	17.5725	17.7175	17.3367				-1	4	2	2	15.5	11.7	11.7	28.649	0	29.425	1857900	9	14	AT2G05100.1;AT2G05070.1;AT3G27690.1;AT3G27690.2;AT2G05100.2	AT2G05100.1;AT2G05070.1;AT3G27690.1;AT3G27690.2;AT2G05100.2	767
NaN	NaN	NaN	NaN	NaN	NaN				-1	2	2	2	3.1	3.1	3.1	105.71	0	12.873	163190	45	4	AT2G05170.1	AT2G05170.1	768
NaN	NaN	NaN	NaN	NaN	NaN				-1	1	1	1	29	29	29	14.289	0	16.327	12725	7	1	AT2G05520.1	AT2G05520.1	769
17.6387	17.509	17.65	17.9619	17.9913	18.1205				-1	16	16	12	27.7	27.7	21.4	108.2	0	304.9	7069600	50	86	AT2G05710.1	AT2G05710.1	770
NaN	NaN	NaN	NaN	NaN	NaN				-1	1	1	1	9.8	9.8	9.8	22.77	0.0025613	6.5748	100210	16	3	AT2G05840.3;AT2G05840.2;AT2G05840.1	AT2G05840.3;AT2G05840.2;AT2G05840.1	771
NaN	NaN	NaN	NaN	NaN	NaN				-1	3	3	3	8.8	8.8	8.8	80.014	0	31.536	192030	32	6	AT2G05920.1	AT2G05920.1	772
NaN	NaN	NaN	NaN	NaN	NaN				-1	1	1	1	5.1	5.1	5.1	41.213	0.0049822	6.1694	40219	22	1	AT2G05990.2;AT2G05990.1	AT2G05990.2;AT2G05990.1	773
NaN	17.2332	17.1157	16.9478	17.0559	16.9451				-1	4	4	4	20.6	20.6	20.6	34.291	0	56.787	1214000	17	14	AT2G06850.1;AT2G06850.2	AT2G06850.1;AT2G06850.2	774
14.5506	NaN	NaN	16.0768	16.2137	16.0238				-1	11	11	11	17.9	17.9	17.9	130.08	0	92.436	1503500	53	34	AT2G07360.1;AT2G07360.2	AT2G07360.1;AT2G07360.2	775
16.2346	16.2217	16.2845	16.1106	16.1896	16.2962				-1	10	10	10	18.5	18.5	18.5	85.932	0	95.012	1957700	32	36	AT2G07698.1	AT2G07698.1	776
15.2385	14.8286	NaN	15.7826	NaN	15.3667				-1	1	1	1	10.1	10.1	10.1	18.211	0	35.221	277410	8	9	AT2G07707.1	AT2G07707.1	777
17.4713	17.6001	17.6754	17.0394	17.2963	17.0159				-1	6	2	2	35.6	8.2	8.2	16.631	0	14.718	1516400	9	12	AT2G09990.1	AT2G09990.1	778
NaN	NaN	NaN	NaN	NaN	NaN				-1	1	1	1	4.5	4.5	4.5	29.648	0.0003917	7.3704	75530	19	2	AT2G10940.2;AT2G10940.1	AT2G10940.2;AT2G10940.1	779
NaN	NaN	NaN	NaN	NaN	NaN				-1	1	1	1	2.4	2.4	2.4	80.419	0.0018471	6.6911	187950	34	6	AT2G11000.3;AT2G11000.2;AT2G11000.1	AT2G11000.3;AT2G11000.2;AT2G11000.1	780
15.7151	15.3623	15.4926	15.8094	15.5531	15.5693				-1	4	4	4	11.8	11.8	11.8	57.458	0	40.985	713420	29	19	AT2G11520.1	AT2G11520.1	781
NaN	NaN	NaN	NaN	NaN	NaN				-1	1	1	1	11	11	11	24.162	0.00078064	7.3199	37937	13	2	AT2G11890.1	AT2G11890.1	782
NaN	NaN	NaN	NaN	NaN	NaN				-1	1	1	1	4	4	4	44.207	0.00040404	7.9171	57904	21	2	AT2G13360.3;AT2G13360.2;AT2G13360.1	AT2G13360.3;AT2G13360.2;AT2G13360.1	783
16.5237	16.6974	16.6726	16.4518	16.4917	16.5626				-1	7	7	7	17.5	17.5	17.5	69.655	0	72.122	2261500	30	44	AT2G13560.1	AT2G13560.1	784
NaN	NaN	NaN	NaN	NaN	NaN				-1	1	1	1	7.6	7.6	7.6	29.787	0.0011291	6.9093	52197	16	3	AT2G14750.1	AT2G14750.1	785
NaN	NaN	NaN	NaN	NaN	NaN				-1	1	1	1	6.1	6.1	6.1	37.437	0.002565	6.5973	115100	16	4	AT2G14835.2;AT2G14835.1	AT2G14835.2;AT2G14835.1	786
NaN	NaN	NaN	NaN	NaN	NaN				-1	2	2	2	37.1	37.1	37.1	11.653	0	14.484	62215	6	3	AT2G14880.3;AT2G14880.2;AT2G14880.1	AT2G14880.3;AT2G14880.2;AT2G14880.1	787
NaN	NaN	NaN	NaN	NaN	NaN				-1	3	3	3	12.9	12.9	12.9	54.19	0	59.331	322690	29	8	AT2G15090.1;AT4G34510.1;AT4G34250.1	AT2G15090.1	788
17.3787	17.5921	NaN	NaN	NaN	16.886				-1	2	2	2	14.4	14.4	14.4	22.34	0	34.162	682110	9	9	AT2G15270.2;AT2G15270.1	AT2G15270.2;AT2G15270.1	789
NaN	NaN	NaN	NaN	NaN	NaN				-1	3	3	3	16	16	16	35.461	0	38.373	110840	14	5	AT2G15430.1	AT2G15430.1	790
NaN	NaN	NaN	NaN	NaN	NaN				-1	1	1	1	3.8	3.8	3.8	65.613	0.00040766	8.1095	31840	29	3	AT2G15690.1	AT2G15690.1	791
NaN	NaN	NaN	NaN	NaN	NaN				-1	1	1	1	5.5	5.5	5.5	40.606	0.00041305	8.4193	53198	18	2	AT2G15790.1	AT2G15790.1	792
16.3012	16.2594	16.2535	16.6083	16.8056	16.6538				-1	5	5	5	44.4	44.4	44.4	18.034	0	60.139	1543200	11	28	AT2G16060.1	AT2G16060.1	793
NaN	NaN	NaN	NaN	NaN	NaN				-1	1	1	1	6.2	6.2	6.2	33.64	0.00039746	7.6432	55607	16	6	AT2G16070.2	AT2G16070.2	794
NaN	NaN	NaN	NaN	NaN	NaN				-1	2	2	2	7.8	7.8	7.8	57.973	0	12.417	101880	27	3	AT2G16280.1;AT4G34520.1;AT1G19440.1	AT2G16280.1;AT4G34520.1;AT1G19440.1	795
17.3185	17.3519	17.469	17.458	17.3134	17.4143				-1	6	6	5	55.5	55.5	50.3	18.492	0	177.88	2762300	9	27	AT2G16600.1;AT2G16600.2	AT2G16600.1;AT2G16600.2	796
NaN	NaN	NaN	NaN	NaN	NaN				-1	2	2	2	8.7	8.7	8.7	35.17	0	12.253	96556	12	4	AT2G16860.2;AT2G16860.1	AT2G16860.2;AT2G16860.1	797
16.4758	16.4854	16.5719	16.6898	16.6777	16.7155				-1	11	11	11	14.7	14.7	14.7	122.18	0	194.28	2156600	49	52	AT2G16920.2;AT2G16920.1	AT2G16920.2;AT2G16920.1	798
15.256	15.4355	NaN	14.932	NaN	NaN				-1	1	1	1	12.3	12.3	12.3	16.7	0.000392	7.3813	208150	7	6	AT5G15220.2;AT5G15220.1;AT2G16930.4;AT2G16930.3;AT2G16930.2;AT2G16930.1	AT5G15220.2;AT5G15220.1;AT2G16930.4;AT2G16930.3;AT2G16930.2;AT2G16930.1	799
18.1909	18.387	18.422	18.3616	18.3904	18.1534				-1	15	15	15	25.5	25.5	25.5	63.098	0	299.76	8820000	18	88	AT2G16940.1;AT2G16940.3;AT2G16940.2;AT2G16940.5;AT2G16940.4	AT2G16940.1;AT2G16940.3;AT2G16940.2;AT2G16940.5;AT2G16940.4	800
NaN	NaN	NaN	NaN	NaN	NaN				-1	2	2	2	7.2	7.2	7.2	99.108	0	16.381	67972	42	2	AT2G16950.2;AT2G16950.1	AT2G16950.2;AT2G16950.1	801
NaN	NaN	14.3086	14.1251	NaN	NaN				-1	7	3	3	20.8	10.5	10.5	61.111	0	19.371	175100	29	7	AT2G17290.2;AT2G17290.1;AT4G38230.4;AT4G38230.3;AT4G38230.2;AT4G38230.1	AT2G17290.2;AT2G17290.1	802
19.2321	19.2119	19.2825	19.0881	19.2475	19.086				-1	18	18	2	57.4	57.4	10.7	27.707	0	323.31	13581000	16	112	AT5G07090.3;AT5G07090.2;AT2G17360.1;AT5G07090.1;AT2G17360.2	AT5G07090.3;AT5G07090.2;AT2G17360.1;AT5G07090.1;AT2G17360.2	803
NaN	NaN	NaN	NaN	NaN	NaN				-1	5	2	2	12.5	8.7	8.7	36.899	0	12.592	69896	14	3	AT2G17390.1	AT2G17390.1	804
NaN	NaN	NaN	15.9551	16.1281	16.1679				-1	6	6	4	32.4	32.4	20.8	38.257	0	65.292	586070	13	12	AT2G17420.2;AT2G17420.1	AT2G17420.2;AT2G17420.1	805
17.5345	17.5419	17.6916	NaN	NaN	14.7992				-1	10	10	10	35.2	35.2	35.2	58.742	0	94.2	1968100	28	28	AT2G17440.1	AT2G17440.1	806
19.6814	19.9837	19.3568	18.8394	NaN	NaN				-1	4	4	4	28.4	28.4	28.4	14.975	0	91.587	4414100	9	14	AT2G17560.3;AT2G17560.2;AT2G17560.1	AT2G17560.3;AT2G17560.2;AT2G17560.1	807
16.1056	16.3369	16.1769	15.9251	15.8618	16.1708				-1	5	5	5	29.9	29.9	29.9	32.691	0	65.981	938630	15	19	AT2G17720.1	AT2G17720.1	808
19.0011	18.9528	19.0299	19.0995	19.2473	19.2158				-1	3	3	3	6.7	6.7	6.7	89.492	0	29.539	4079200	44	14	AT2G17790.1	AT2G17790.1	809
15.6461	NaN	15.532	15.7928	15.4282	15.7069				-1	5	5	5	35.9	35.9	35.9	29.564	0	46.465	598230	18	17	AT2G17870.1	AT2G17870.1	810
NaN	NaN	NaN	NaN	NaN	NaN				-1	3	3	3	9.6	9.6	9.6	69.15	0	20.801	113820	32	5	AT2G17980.1	AT2G17980.1	811
18.3569	18.2945	18.5942	18.374	18.484	18.455				-1	8	8	2	41.5	41.5	14.3	27.859	0	227.5	7143100	14	59	AT2G18020.1	AT2G18020.1	812
18.47	18.6009	18.5248	18.294	18.3383	18.1208				-1	6	6	6	52.1	52.1	52.1	13.015	0	133.77	5565800	9	27	AT2G18040.1	AT2G18040.1	813
NaN	NaN	NaN	14.8457	NaN	14.6382				-1	3	1	1	11.3	7.4	7.4	25.266	0.00042937	10.066	137770	11	5	AT2G18110.1	AT2G18110.1	814
NaN	NaN	NaN	NaN	NaN	NaN				-1	3	2	2	15.6	12.4	12.4	24.671	0	11.723	51778	10	3	AT2G18230.1	AT2G18230.1	815
NaN	NaN	NaN	NaN	NaN	NaN				-1	1	1	1	3.8	3.8	3.8	71.194	0.0003973	7.6374	24584	38	1	AT2G18330.1	AT2G18330.1	816
16.1977	NaN	15.6655	NaN	NaN	NaN				-1	4	4	4	20.1	20.1	20.1	35.526	0	41.269	392600	16	10	AT2G18360.1;AT2G18360.2	AT2G18360.1;AT2G18360.2	817
17.0604	16.8317	17.008	NaN	NaN	NaN				-1	4	4	4	14.8	14.8	14.8	53.88	0	26.405	521300	24	9	AT2G18730.1	AT2G18730.1	818
16.6019	16.8664	16.9501	16.7549	16.6621	16.724				-1	3	3	1	55.7	55.7	18.2	10.298	0	73.7	1042100	4	14	AT2G18740.1;AT2G18740.2	AT2G18740.1;AT2G18740.2	819
20.5522	20.6205	20.6375	19.609	19.5918	19.6693				-1	54	17	16	53.3	21.2	20.2	104.22	0	323.31	22537000	50	83	AT2G18960.1;AT2G18960.3;AT2G18960.2;AT2G07560.1;AT2G24520.4;AT2G24520.3;AT2G24520.1;AT2G24520.2;AT1G17260.1	AT2G18960.1;AT2G18960.3;AT2G18960.2	820
NaN	NaN	NaN	NaN	NaN	NaN				-1	3	1	1	24.6	7.6	7.6	24.451	0.0032503	6.398	90124	13	3	AT2G18990.1	AT2G18990.1	821
NaN	15.2302	NaN	NaN	15.1004	15.2005				-1	5	5	5	8.3	8.3	8.3	127.21	0	55.166	289150	51	10	AT2G19110.3;AT2G19110.2;AT2G19110.1	AT2G19110.3;AT2G19110.2;AT2G19110.1	822
15.1785	15.1337	15.2378	NaN	NaN	NaN				-1	6	6	6	12.4	12.4	12.4	98.711	0	92.982	352750	39	12	AT2G19190.1	AT2G19190.1	823
14.5097	15.0142	NaN	NaN	NaN	NaN				-1	2	2	2	16.4	16.4	16.4	30.656	0	15.998	123530	13	5	AT2G19385.1	AT2G19385.1	824
17.6363	17.8914	NaN	18.5598	18.0847	18.4787				-1	6	6	5	28.5	28.5	24.5	42.846	0	73.673	2543500	13	24	AT2G19480.3;AT2G19480.2;AT2G19480.1	AT2G19480.3;AT2G19480.2;AT2G19480.1	825
NaN	NaN	NaN	15.1055	15.2524	15.1591				-1	3	3	3	18.6	18.6	18.6	32.581	0	20.866	325640	17	10	AT2G19570.1	AT2G19570.1	826
NaN	14.9922	15.3963	15.0358	NaN	14.8077				-1	2	2	2	11.9	11.9	11.9	35.202	0	22.625	296560	16	11	AT2G19590.1;AT2G19590.2	AT2G19590.1;AT2G19590.2	827
NaN	NaN	NaN	NaN	NaN	NaN				-1	1	1	1	5.5	5.5	5.5	41.171	0	25.708	66995	16	3	AT2G19670.1	AT2G19670.1	828
16.1232	NaN	16.4963	15.6594	16.0208	15.6199				-1	3	2	2	30.8	21.7	21.7	15.895	0	26.022	480280	7	11	AT2G19730.3;AT2G19730.2;AT2G19730.1	AT2G19730.3;AT2G19730.2;AT2G19730.1	829
20.1248	19.9888	20.2521	19.848	19.8348	19.8186				-1	4	4	4	33.6	33.6	33.6	13.803	0	83.592	8694300	3	28	AT5G56710.1;AT4G26230.1;AT2G19740.1;AT5G56710.2	AT5G56710.1;AT4G26230.1;AT2G19740.1;AT5G56710.2	830
NaN	NaN	NaN	NaN	NaN	NaN				-1	1	1	1	19.1	19.1	19.1	14.266	0.0025707	6.6192	20926	6	2	AT2G19760.1	AT2G19760.1	831
NaN	NaN	NaN	NaN	NaN	NaN				-1	2	1	1	20.2	9.9	9.9	24.014	0	11.368	164900	11	6	AT2G19830.2;AT4G29160.2;AT2G19830.1	AT2G19830.2;AT4G29160.2;AT2G19830.1	832
15.0752	NaN	15.3233	NaN	NaN	NaN				-1	5	2	2	18.8	9.4	9.4	42.926	0	14.225	241920	19	9	AT2G19860.2;AT2G19860.1	AT2G19860.2;AT2G19860.1	833
NaN	NaN	NaN	NaN	NaN	NaN				-1	1	1	1	3.6	3.6	3.6	65.559	0.0025726	6.6243	13393	30	2	AT2G19870.1	AT2G19870.1	834
16.3681	16.7616	16.5756	NaN	NaN	14.9254				-1	2	2	2	14.1	14.1	14.1	19.953	0	27.915	582840	9	13	AT2G19970.1	AT2G19970.1	835
NaN	NaN	NaN	NaN	NaN	NaN				-1	2	2	2	3.5	3.5	3.5	106.35	0	14.546	52624	52	5	AT2G20010.2;AT2G20010.1	AT2G20010.2;AT2G20010.1	836
13.9664	12.7521	14.0995	16.3029	16.6919	15.955				-1	11	11	11	16.6	16.6	16.6	121.09	0	138.56	1542900	50	36	AT2G20050.2;AT2G20050.1	AT2G20050.2;AT2G20050.1	837
NaN	NaN	NaN	15.3446	15.4098	15.315				-1	6	6	6	7.8	7.8	7.8	158.95	0	43.411	366620	73	11	AT2G20190.1	AT2G20190.1	838
NaN	NaN	NaN	NaN	NaN	NaN				-1	1	1	1	13.8	13.8	13.8	15.189	0.0014831	6.7372	17990	6	2	AT2G20260.1	AT2G20260.1	839
NaN	NaN	NaN	NaN	NaN	NaN				-1	3	3	3	11.1	11.1	11.1	42.389	0	20.657	238630	22	7	AT2G20280.1	AT2G20280.1	840
NaN	NaN	NaN	NaN	NaN	NaN				-1	1	1	1	15.3	15.3	15.3	17.518	0.0025622	6.588	19439	7	2	AT2G20390.2;AT2G20390.1	AT2G20390.2;AT2G20390.1	841
NaN	NaN	NaN	14.5503	14.5585	14.9167				-1	2	2	2	5.7	5.7	5.7	45.345	0	15.418	245820	28	9	AT2G20420.1	AT2G20420.1	842
NaN	NaN	NaN	NaN	NaN	NaN				-1	3	1	1	29.9	17.9	17.9	15.506	0	11.951	29710	6	1	AT2G20450.1	AT2G20450.1	843
NaN	NaN	NaN	NaN	NaN	NaN				-1	1	1	1	23.8	23.8	23.8	7.2633	0	13.735	224040	3	3	AT2G20490.2;AT2G20490.3;AT2G20490.1	AT2G20490.2;AT2G20490.3;AT2G20490.1	844
19.1043	19.0864	18.9843	18.615	18.598	18.6592				-1	13	10	9	66.4	54.2	50.3	31.636	0	323.31	6135100	13	57	AT2G20530.2;AT2G20530.1	AT2G20530.2;AT2G20530.1	845
NaN	NaN	NaN	NaN	NaN	NaN				-1	2	2	2	15.4	15.4	15.4	37.109	0	12.111	168110	17	4	AT2G20560.1	AT2G20560.1	846
19.3173	19.2187	19.3039	18.002	17.9916	17.972				-1	32	32	22	52.5	52.5	42	98.143	0	323.31	14039000	54	126	AT2G20580.1	AT2G20580.1	847
NaN	NaN	NaN	NaN	NaN	NaN				-1	2	2	2	7.4	7.4	7.4	51.087	0	14.932	33355	29	2	AT2G20610.1	AT2G20610.1	848
NaN	NaN	NaN	NaN	NaN	NaN				-1	2	2	2	19	19	19	30.496	0	20.84	150310	18	5	AT2G20630.1;AT2G20630.2	AT2G20630.1;AT2G20630.2	849
NaN	NaN	NaN	NaN	NaN	NaN				-1	2	2	2	7.3	7.3	7.3	45.812	0	14.595	219070	16	5	AT2G20790.3;AT2G20790.2;AT2G20790.4;AT2G20790.1	AT2G20790.3;AT2G20790.2;AT2G20790.4;AT2G20790.1	850
NaN	NaN	NaN	15.9328	15.9631	15.9415				-1	5	5	5	10.8	10.8	10.8	84.823	0	62.62	791680	35	16	AT2G20850.1;AT2G20850.2	AT2G20850.1	851
NaN	NaN	NaN	NaN	NaN	NaN				-1	1	1	1	5.6	5.6	5.6	41.344	0	45.144	652110	19	13	AT2G20860.3;AT2G20860.2;AT2G20860.1	AT2G20860.3;AT2G20860.2;AT2G20860.1	852
NaN	NaN	NaN	NaN	NaN	NaN				-1	1	1	1	4.1	4.1	4.1	55.267	0.0014864	6.7707	46864	28	5	AT2G20900.3;AT2G20900.2;AT2G20900.4;AT2G20900.1	AT2G20900.3;AT2G20900.2;AT2G20900.4;AT2G20900.1	853
NaN	15.9706	NaN	15.9318	15.8512	15.7338				-1	2	2	2	25.7	25.7	25.7	15.679	0	30.152	577310	7	10	AT2G20930.1	AT2G20930.1	854
18.2292	17.5757	17.064	16.5178	15.7283	16.2235				-1	9	9	9	22.4	22.4	22.4	61.743	0	159.14	1759200	34	34	AT2G20990.1;AT2G20990.3;AT2G20990.2;AT2G21010.1	AT2G20990.1;AT2G20990.3;AT2G20990.2	855
15.399	15.2946	15.4748	15.2141	15.2946	15.47				-1	3	3	3	32.8	32.8	32.8	19.077	0	118.51	514490	11	13	AT2G21060.1	AT2G21060.1	856
NaN	NaN	NaN	NaN	NaN	NaN				-1	2	2	2	14	14	14	28.167	0	15.628	88559	6	2	AT2G21160.1;AT2G21160.2	AT2G21160.1;AT2G21160.2	857
14.8433	15.1273	14.9901	16.5559	16.5718	16.5821				-1	7	7	7	29.4	29.4	29.4	35.01	0	94.807	1035800	16	23	AT2G21250.1;AT2G21250.2;AT2G21260.2;AT2G21260.1	AT2G21250.1;AT2G21250.2	858
21.9877	22.0181	22.0208	21.994	22.0577	22.1113				-1	35	18	17	84.5	66.7	66.7	42.93	0	323.31	111840000	21	204	AT2G21330.1;AT2G21330.3;AT2G21330.2	AT2G21330.1;AT2G21330.3;AT2G21330.2	859
16.4724	16.5479	16.5575	17.3147	17.2069	17.134				-1	19	19	11	22.7	22.7	15.3	136.47	0	212.54	5250100	70	79	AT2G21390.1	AT2G21390.1	860
NaN	NaN	NaN	17.2205	17.076	17.2872				-1	7	5	5	16.7	12.7	12.7	93.105	0	58.02	998790	32	15	AT2G21410.1	AT2G21410.1	861
NaN	NaN	NaN	NaN	NaN	NaN				-1	1	1	1	13	13	13	19.298	0.00076953	7.1715	78318	3	2	AT2G21490.1	AT2G21490.1	862
16.3979	16.4222	NaN	15.8727	16.0749	16.0267				-1	4	2	1	43	31.8	19.6	11.941	0	66.805	635750	6	11	AT2G21580.2;AT2G21580.1;AT2G16360.1	AT2G21580.2;AT2G21580.1;AT2G16360.1	863
17.9528	18.208	18.2313	18.5032	18.502	18.5128				-1	7	7	6	51.7	51.7	45.5	16.89	0	168.96	3145200	12	32	AT2G21660.1;AT2G21660.2	AT2G21660.1;AT2G21660.2	864
16.4112	16.1128	16.2531	16.1366	15.9158	16.141				-1	3	3	3	25	25	25	25.16	0	43.838	1073500	12	20	AT2G21870.2;AT2G21870.1	AT2G21870.2;AT2G21870.1	865
12.9578	12.9768	12.8157	20.9203	20.9743	20.8522				-1	83	83	83	53.4	53.4	53.4	230.7	0	323.31	80725000	110	301	AT2G22125.1	AT2G22125.1	866
NaN	NaN	NaN	NaN	NaN	NaN				-1	1	1	1	3.5	3.5	3.5	46.038	0	18.915	189300	19	6	AT2G22250.1;AT2G22250.3;AT2G22250.2	AT2G22250.1;AT2G22250.3;AT2G22250.2	867
NaN	NaN	NaN	NaN	NaN	NaN				-1	1	1	1	3.4	3.4	3.4	47.761	0.00039417	7.4771	14000	24	1	AT2G22360.1	AT2G22360.1	868
15.6031	16.057	16.0298	16.1853	15.8412	16.0738				-1	3	3	3	19	19	19	26.651	0	40.863	748710	13	13	AT2G22475.2;AT2G22475.1	AT2G22475.2;AT2G22475.1	869
18.178	18.0351	18.251	NaN	17.2248	16.9008				-1	7	7	7	14.2	14.2	14.2	89.486	0	84.339	1637300	49	20	AT2G22660.2;AT2G22660.3;AT2G22660.1	AT2G22660.2;AT2G22660.3;AT2G22660.1	870
17.9413	18.054	18.1887	17.7264	17.7996	17.8625				-1	10	10	10	54.8	54.8	54.8	37.465	0	209.39	7153100	18	55	AT2G22780.1;AT5G09660.2;AT5G09660.3;AT5G09660.5;AT5G09660.1;AT5G09660.4	AT2G22780.1	871
15.3859	15.5468	15.459	15.1036	14.9489	14.766				-1	4	4	3	13.4	13.4	10.2	50.236	0	50.201	649310	22	21	AT2G23070.1;AT2G23080.2	AT2G23070.1	872
17.1899	17.5604	17.3941	NaN	NaN	NaN				-1	2	2	2	33.3	33.3	33.3	8.3758	0	28.027	1094300	5	11	AT2G23090.1	AT2G23090.1	873
NaN	NaN	NaN	NaN	NaN	NaN				-1	1	1	1	19.3	19.3	19.3	8.4821	0.00039277	7.4149	18714	2	3	AT2G23120.1	AT2G23120.1	874
NaN	NaN	NaN	NaN	NaN	NaN				-1	1	1	1	3.9	3.9	3.9	71.652	0.0032491	6.3943	37785	30	1	AT2G23350.1	AT2G23350.1	875
NaN	NaN	NaN	NaN	NaN	NaN				-1	1	1	1	1.7	1.7	1.7	100.05	0	31.078	165840	45	4	AT2G23520.1	AT2G23520.1	876
NaN	NaN	NaN	15.3014	NaN	15.3009				-1	2	2	2	11	11	11	29.667	0	12.496	161480	14	5	AT2G23600.1;AT2G23600.2	AT2G23600.1;AT2G23600.2	877
NaN	NaN	NaN	14.8416	NaN	14.7971				-1	2	2	2	10.3	10.3	10.3	29.823	0	13.321	139530	16	5	AT2G23610.1;AT2G23610.2;AT2G23550.2;AT2G23580.1;AT2G23550.1;AT2G23550.4	AT2G23610.1;AT2G23610.2;AT2G23550.2;AT2G23580.1;AT2G23550.1;AT2G23550.4	878
NaN	NaN	NaN	NaN	NaN	NaN				-1	1	1	1	55.6	55.6	55.6	5.7965	0	10.894	91878	4	2	AT2G23930.2;AT2G23930.1	AT2G23930.2;AT2G23930.1	879
NaN	NaN	NaN	NaN	NaN	NaN				-1	1	1	1	9.8	9.8	9.8	19.627	0.00041859	8.8229	28403	7	3	AT2G23940.3;AT2G23940.2;AT2G23940.1	AT2G23940.3;AT2G23940.2;AT2G23940.1	880
16.7627	17.2356	17.3008	16.2643	16.1705	15.8013				-1	3	2	2	17.3	13.1	13.1	35.141	0	31.446	964610	14	13	AT2G24060.1	AT2G24060.1	881
NaN	NaN	NaN	NaN	NaN	NaN				-1	2	2	2	8	8	8	57.008	0	26.864	55247	28	4	AT2G24180.1	AT2G24180.1	882
17.4019	17.4387	17.3039	19.2185	19.1667	19.245				-1	16	16	14	49.6	49.6	44.6	54.509	0	323.31	5564500	29	52	AT2G24200.1;AT2G24200.2;AT2G24200.3	AT2G24200.1;AT2G24200.2;AT2G24200.3	883
15.4094	14.9408	15.0009	17.8429	17.8038	17.6644				-1	11	11	11	35.1	35.1	35.1	53.06	0	323.31	4281200	25	45	AT2G24270.3;AT2G24270.1;AT2G24270.2;AT2G24270.4	AT2G24270.3;AT2G24270.1;AT2G24270.2;AT2G24270.4	884
NaN	15.0053	14.919	NaN	NaN	NaN				-1	1	1	1	3	3	3	50.351	0.00077942	7.3094	135080	19	5	AT2G24420.2;AT2G24420.1	AT2G24420.2;AT2G24420.1	885
15.5454	16.1373	15.7029	NaN	NaN	NaN				-1	3	3	3	25.1	25.1	25.1	20.712	0	31.913	313940	6	10	AT2G24440.1	AT2G24440.1	886
16.9318	16.967	17.0186	17.1434	17.1635	17.16				-1	10	10	10	38.5	38.5	38.5	45.701	0	128.86	2744800	19	42	AT2G24580.1	AT2G24580.1	887
16.3844	16.8223	NaN	15.6389	15.8161	NaN				-1	5	4	4	25	19.4	19.4	21.915	0	44.367	675630	8	12	AT2G24590.1	AT2G24590.1	888
NaN	NaN	NaN	15.0216	NaN	14.304				-1	1	1	1	25	25	25	11.031	0	22.857	179150	6	8	AT2G24940.1	AT2G24940.1	889
NaN	NaN	NaN	NaN	NaN	NaN				-1	1	1	1	8.2	8.2	8.2	39.354	0.00040816	8.1253	89221	20	3	AT2G25070.2;AT2G25070.1	AT2G25070.2;AT2G25070.1	890
NaN	NaN	NaN	NaN	NaN	NaN				-1	1	1	1	11	11	11	26.015	0.0014931	6.8417	37731	13	2	AT2G25080.1	AT2G25080.1	891
NaN	NaN	NaN	NaN	NaN	NaN				-1	2	2	2	12.8	12.8	12.8	23.935	0	16.043	239280	6	6	AT2G25110.1	AT2G25110.1	892
NaN	NaN	NaN	NaN	NaN	NaN				-1	2	2	2	11.2	11.2	11.2	26.697	0	24.86	320080	8	4	AT2G25190.1	AT2G25190.1	893
NaN	NaN	NaN	16.6718	16.6569	NaN				-1	2	2	2	27.3	27.3	27.3	5.6007	0	14.736	516100	1	7	AT2G25210.1;AT4G31985.1	AT2G25210.1;AT4G31985.1	894
NaN	NaN	NaN	NaN	NaN	NaN				-1	1	1	1	4.8	4.8	4.8	32.644	0.00040112	7.8035	70944	19	5	AT2G25280.1	AT2G25280.1	895
NaN	NaN	NaN	NaN	NaN	NaN				-1	2	2	2	2.2	2.2	2.2	187.81	0	13.956	32575	78	3	AT2G25320.3;AT2G25320.1;AT2G25320.2	AT2G25320.3;AT2G25320.1;AT2G25320.2	896
NaN	NaN	NaN	NaN	NaN	NaN				-1	1	1	1	9.9	9.9	9.9	23.622	0	11.135	54073	14	3	AT2G25355.2;AT2G25355.1	AT2G25355.2;AT2G25355.1	897
17.2292	16.8391	17.0413	15.8985	16.0056	15.9573				-1	11	11	9	23.9	23.9	22.4	72.083	0	166.62	1385900	37	31	AT2G25430.1	AT2G25430.1	898
NaN	NaN	NaN	16.3376	16.5648	16.5409				-1	2	2	2	15	15	15	40.351	0	17.84	703040	18	11	AT2G25450.1	AT2G25450.1	899
18.4313	19.0435	NaN	NaN	NaN	NaN				-1	3	3	3	15.1	15.1	15.1	35.128	0	62.159	1558700	11	8	AT2G25670.2;AT2G25670.1	AT2G25670.2;AT2G25670.1	900
NaN	NaN	NaN	NaN	NaN	NaN				-1	1	1	1	12.8	12.8	12.8	13.026	0.00042974	10.067	87415	6	3	AT2G25720.1	AT2G25720.1	901
NaN	NaN	NaN	NaN	NaN	NaN				-1	1	1	1	0.8	0.8	0.8	274.77	0.00039793	7.6511	134270	133	5	AT2G25730.1;AT2G25730.4;AT2G25730.3;AT2G25730.2	AT2G25730.1;AT2G25730.4;AT2G25730.3;AT2G25730.2	902
16.7897	16.6895	16.7519	16.8893	16.7819	16.7482				-1	16	16	16	25.1	25.1	25.1	109.96	0	159.71	3146400	52	63	AT2G25800.1	AT2G25800.1	903
NaN	NaN	NaN	NaN	NaN	NaN				-1	1	1	1	3.6	3.6	3.6	65.305	0.00041442	8.5183	24662	25	2	AT2G25870.1	AT2G25870.1	904
16.6379	16.3276	NaN	NaN	NaN	NaN				-1	2	2	2	25.5	25.5	25.5	16.137	0	68.905	274800	4	6	AT2G25890.1;AT2G25890.2	AT2G25890.1;AT2G25890.2	905
NaN	NaN	NaN	NaN	NaN	NaN				-1	1	1	1	2.4	2.4	2.4	64.606	0.00039432	7.4796	15127	19	1	AT2G25970.1	AT2G25970.1	906
15.6176	15.9145	15.7549	15.5941	15.7581	15.9576				-1	9	2	2	14.8	3.8	3.8	113.77	0	41.831	418360	43	13	AT2G26080.1	AT2G26080.1	907
16.2424	16.3563	16.1759	16.3882	15.992	16.1367				-1	4	4	4	13.2	13.2	13.2	77.274	0	30.331	623420	39	14	AT2G26140.1	AT2G26140.1	908
16.7217	16.9082	16.7997	18.7366	18.8329	18.6972				-1	10	10	10	24.2	24.2	24.2	61.96	0	184.89	3690400	29	32	AT2G26250.1	AT2G26250.1	909
14.4912	14.3425	NaN	NaN	NaN	NaN				-1	2	2	2	7.6	7.6	7.6	62.146	0	14.215	71775	24	4	AT2G26280.3;AT2G26280.1	AT2G26280.3;AT2G26280.1	910
17.6561	17.4986	17.628	16.1342	15.9563	16.0844				-1	7	7	7	28.5	28.5	28.5	44.545	0	91.089	1849800	27	28	AT2G26300.2;AT2G26300.1	AT2G26300.2;AT2G26300.1	911
NaN	NaN	NaN	NaN	NaN	NaN				-1	1	1	1	5.7	5.7	5.7	33.976	0.0039469	6.2659	17600	18	1	AT2G26430.4;AT2G26430.1	AT2G26430.4;AT2G26430.1	912
12.7892	14.2186	13.6994	17.1687	17.1985	17.3058				-1	18	18	17	39.8	39.8	37.3	89.293	0	233.2	2076400	49	50	AT2G26570.2;AT2G26570.1	AT2G26570.2;AT2G26570.1	913
NaN	NaN	NaN	14.358	NaN	14.3993				-1	4	4	4	7.8	7.8	7.8	84.995	0	38.564	171400	41	11	AT2G26650.2;AT2G26650.1	AT2G26650.2;AT2G26650.1	914
17.6632	17.4552	17.6391	16.3169	16.4171	16.228				-1	6	6	6	17.5	17.5	17.5	71.751	0	220.15	2424500	35	29	AT2G26730.1	AT2G26730.1	915
14.515	14.4382	14.7247	16.734	16.3966	16.1876				-1	11	11	11	12.1	12.1	12.1	199.7	0	156.68	1200200	91	28	AT2G26780.2;AT2G26780.1	AT2G26780.2;AT2G26780.1	916
NaN	NaN	NaN	NaN	NaN	NaN				-1	2	2	2	1.1	1.1	1.1	279.07	0	10.739	113350	110	3	AT2G26890.1	AT2G26890.1	917
NaN	NaN	NaN	NaN	NaN	NaN				-1	3	2	2	3.6	2.8	2.8	161.26	0	13.563	96579	66	4	AT2G26910.1	AT2G26910.1	918
NaN	NaN	NaN	15.6481	NaN	15.6953				-1	4	4	4	26.5	26.5	26.5	27.377	0	54.586	374030	16	9	AT2G27020.1;AT2G27020.2	AT2G27020.1;AT2G27020.2	919
NaN	NaN	NaN	NaN	NaN	NaN				-1	8	2	1	65.8	38.9	18.8	16.819	0	22.613	41549	9	3	AT3G56800.1;AT2G41110.1;AT2G27030.1;AT2G27030.3;AT5G21274.1;AT3G43810.1;AT3G43810.2;AT2G41110.2	AT3G56800.1;AT2G41110.1;AT2G27030.1;AT2G27030.3;AT5G21274.1;AT3G43810.1;AT3G43810.2;AT2G41110.2	920
NaN	NaN	NaN	NaN	NaN	NaN				-1	2	2	2	4.3	4.3	4.3	83.736	0	14.876	68723	36	3	AT2G27090.2;AT2G27090.1	AT2G27090.2;AT2G27090.1	921
NaN	NaN	NaN	NaN	NaN	NaN				-1	1	1	1	1.9	1.9	1.9	81.097	0.00040128	7.8035	137490	36	4	AT2G27100.1	AT2G27100.1	922
NaN	NaN	NaN	NaN	NaN	NaN				-1	7	1	1	11.9	4.3	4.3	107.02	0.0059986	6.0905	17975	52	1	AT2G27210.2;AT2G27210.1	AT2G27210.2;AT2G27210.1	923
NaN	NaN	NaN	NaN	NaN	NaN				-1	1	1	1	5.1	5.1	5.1	42.885	0.0066503	6.0058	4790.5	20	1	AT2G27590.1	AT2G27590.1	924
14.8335	15.0707	15.1126	15.1374	15.176	15.3544				-1	6	6	6	25.3	25.3	25.3	48.592	0	84.207	701580	28	25	AT2G27600.1	AT2G27600.1	925
19.3539	19.4599	19.1786	19.5748	19.5704	19.6539				-1	7	7	7	65.2	65.2	65.2	11.444	0	274.99	9296500	5	43	AT2G27710.3;AT2G27710.2;AT2G27710.1;AT2G27710.4	AT2G27710.3;AT2G27710.2;AT2G27710.1;AT2G27710.4	926
NaN	16.6395	16.4433	17.0289	17.1677	17.3516				-1	4	4	4	71.3	71.3	71.3	11.452	0	56.973	1288200	5	20	AT2G27720.1;AT2G27720.3;AT2G27720.2;AT2G27720.4	AT2G27720.1;AT2G27720.3;AT2G27720.2	927
NaN	15.3019	NaN	NaN	NaN	14.9718				-1	2	2	2	26.5	26.5	26.5	11.947	0	18.113	206350	5	7	AT2G27730.4;AT2G27730.3;AT2G27730.2;AT2G27730.1	AT2G27730.4;AT2G27730.3;AT2G27730.2;AT2G27730.1	928
15.7523	15.9591	15.9535	17.4462	17.4502	17.2419				-1	16	16	6	58.9	58.9	28.5	43.637	0	246.29	3777100	27	55	AT2G27860.1	AT2G27860.1	929
NaN	NaN	NaN	NaN	NaN	NaN				-1	2	2	2	3.8	3.8	3.8	124.91	0	13.706	59799	50	2	AT2G27900.2;AT2G27900.1	AT2G27900.2;AT2G27900.1	930
19.2109	19.1531	19.1389	19.2155	19.1205	19.2452				-1	23	23	23	58.2	58.2	58.2	62.071	0	323.31	15214000	31	121	AT2G28000.1	AT2G28000.1	931
NaN	NaN	NaN	NaN	NaN	NaN				-1	1	1	1	4.5	4.5	4.5	43.65	0	25.819	99851	25	4	AT2G28150.3;AT2G28150.2;AT2G28150.1	AT2G28150.3;AT2G28150.2;AT2G28150.1	932
NaN	NaN	NaN	NaN	16.1318	15.9213				-1	2	2	2	3.5	3.5	3.5	93.414	0	16.702	229700	34	6	AT2G28520.1	AT2G28520.1	933
NaN	NaN	NaN	NaN	NaN	NaN				-1	1	1	1	8.8	8.8	8.8	15.482	0.00041203	8.3792	182850	8	2	AT2G28900.1	AT2G28900.1	934
NaN	NaN	NaN	NaN	NaN	NaN				-1	1	1	1	6	6	6	37.832	0.0025492	6.5083	106990	12	3	AT2G28910.3;AT2G28910.2;AT2G28910.1	AT2G28910.3;AT2G28910.2;AT2G28910.1	935
NaN	NaN	NaN	NaN	NaN	NaN				-1	2	2	2	2.7	2.7	2.7	98.505	0	11.564	70330	42	2	AT2G29210.2;AT2G29210.1	AT2G29210.2;AT2G29210.1	936
NaN	NaN	NaN	15.5179	15.6401	15.7563				-1	2	2	2	38.5	38.5	38.5	14.078	0	97.598	250350	7	7	AT2G29540.1;AT2G29540.2;AT2G29540.3	AT2G29540.1;AT2G29540.2;AT2G29540.3	937
17.0497	17.1088	17.1234	17.0337	17.1571	17.1201				-1	16	3	2	42.8	12.5	9.1	50.747	0	25.935	1796100	21	19	AT2G29550.1	AT2G29550.1	938
16.6672	16.7673	16.7041	17.5039	17.5774	17.2801				-1	11	11	11	37.1	37.1	37.1	51.599	0	83.554	2204700	26	33	AT2G29560.1	AT2G29560.1	939
15.8762	15.927	15.7835	16.564	16.6348	16.7217				-1	4	4	4	29.2	29.2	29.2	29.222	0	62.431	977440	16	16	AT2G29570.1;AT1G07370.1	AT2G29570.1;AT1G07370.1	940
NaN	NaN	NaN	NaN	NaN	NaN				-1	1	1	1	8.4	8.4	8.4	20.587	0.00042535	9.6374	275660	9	6	AT2G29960.2;AT2G29960.3;AT2G29960.1	AT2G29960.2;AT2G29960.3;AT2G29960.1	941
NaN	NaN	NaN	18.7154	18.8683	18.7714				-1	2	2	2	4.9	4.9	4.9	44.076	0	39.314	1883500	12	9	AT2G29980.1	AT2G29980.1	942
NaN	NaN	NaN	NaN	14.8684	14.8798				-1	5	4	4	27.5	19.9	19.9	32.642	0	28.846	224940	17	7	AT2G30050.1	AT2G30050.1	943
15.7084	15.8098	15.9131	16.7499	16.7582	16.7159				-1	11	11	10	18.5	18.5	16.7	120.25	0	118.69	2283000	59	51	AT2G30110.1	AT2G30110.1	944
16.7842	16.7898	16.9376	17.2895	17.3119	17.3205				-1	10	10	10	38.8	38.8	38.8	57.792	0	208.28	3407400	27	50	AT2G30490.1	AT2G30490.1	945
NaN	NaN	NaN	NaN	NaN	NaN				-1	3	3	3	9.4	9.4	9.4	41.215	0	16.979	88425	21	4	AT2G30530.1	AT2G30530.1	946
16.296	16.1656	16.4293	15.5291	15.6667	15.4126				-1	4	4	2	19.4	19.4	11.5	40.5	0	83.82	798060	24	15	AT2G30740.9;AT2G30740.8;AT2G30740.7;AT2G30740.6;AT2G30740.5;AT2G30740.4;AT2G30740.3;AT2G30740.2;AT2G30740.15;AT2G30740.14;AT2G30740.13;AT2G30740.12;AT2G30740.11;AT2G30740.10;AT2G30740.1	AT2G30740.9;AT2G30740.8;AT2G30740.7;AT2G30740.6;AT2G30740.5;AT2G30740.4;AT2G30740.3;AT2G30740.2;AT2G30740.15;AT2G30740.14;AT2G30740.13;AT2G30740.12;AT2G30740.11;AT2G30740.10;AT2G30740.1	947
NaN	NaN	NaN	NaN	NaN	NaN				-1	1	1	1	4.8	4.8	4.8	56.152	0.00042337	9.3647	85812	30	5	AT2G30750.1	AT2G30750.1	948
17.4307	17.5626	17.6622	18.1815	18.1703	18.253				-1	13	13	12	61.4	61.4	56.3	24.146	0	262.05	5883800	8	59	AT2G30860.1;AT2G30860.2	AT2G30860.1;AT2G30860.2	949
NaN	16.7121	16.7866	17.3796	17.378	17.1548				-1	7	6	6	35.8	30.7	30.7	24.23	0	45.306	1412700	9	17	AT2G30870.1	AT2G30870.1	950
18.4571	18.0001	18.2524	18.1412	18.2446	18.3474				-1	9	9	9	18.6	18.6	18.6	74.157	0	149.67	3333900	33	33	AT2G30950.3;AT2G30950.2;AT2G30950.1;AT2G30950.4;AT1G06430.3;AT1G06430.2;AT1G06430.1	AT2G30950.3;AT2G30950.2;AT2G30950.1;AT2G30950.4	951
20.7418	20.6694	20.8831	20.7618	20.6996	20.6473				-1	33	33	33	80.9	80.9	80.9	47.757	0	323.31	115540000	28	275	AT2G30970.2;AT2G30970.1	AT2G30970.2;AT2G30970.1	952
NaN	NaN	NaN	NaN	NaN	NaN				-1	2	2	2	7.6	7.6	7.6	57.351	0	18.873	359320	24	5	AT2G31060.1;AT2G31060.2;AT2G31060.3	AT2G31060.1;AT2G31060.2;AT2G31060.3	953
NaN	NaN	NaN	NaN	NaN	NaN				-1	1	1	1	6.9	6.9	6.9	41.716	0.00042052	9.0215	174530	16	6	AT2G31370.5;AT2G31370.7;AT2G31370.6;AT2G31370.4;AT2G31370.3;AT2G31370.2;AT2G31370.1	AT2G31370.5;AT2G31370.7;AT2G31370.6;AT2G31370.4;AT2G31370.3;AT2G31370.2;AT2G31370.1	954
22.6845	22.7975	22.8685	22.5287	22.4769	22.5318				-1	35	35	35	83.4	83.4	83.4	35.275	0	323.31	248070000	18	292	AT2G31390.1;AT1G06030.1;AT1G06020.1;AT1G50390.1;AT3G59480.1	AT2G31390.1	955
NaN	NaN	NaN	NaN	NaN	NaN				-1	1	1	1	14.1	14.1	14.1	22.698	0	25.243	46165	8	2	AT2G31410.1	AT2G31410.1	956
19.3718	19.0413	19.1049	17.3152	17.5603	17.382				-1	4	4	4	30.8	30.8	30.8	18.944	0	135.89	4577400	12	23	AT2G31570.1	AT2G31570.1	957
20.2507	20.2084	20.253	19.8702	19.926	19.96				-1	17	17	1	41.2	41.2	4	27.519	0	228.52	26413000	16	104	AT2G31610.1	AT2G31610.1	958
NaN	NaN	NaN	16.7828	16.8705	16.4736				-1	2	2	2	3.4	3.4	3.4	119.25	0	45.426	586030	52	9	AT2G31660.1	AT2G31660.1	959
NaN	NaN	NaN	NaN	13.8405	14.1233				-1	3	3	3	24	24	24	28.865	0	19.036	78792	15	5	AT2G31670.1	AT2G31670.1	960
NaN	NaN	NaN	NaN	NaN	NaN				-1	1	1	1	10	10	10	24.361	0	14.748	46663	16	5	AT2G31680.1	AT2G31680.1	961
NaN	NaN	NaN	15.0616	14.8087	14.6569				-1	3	3	3	12.9	12.9	12.9	51.053	0	39.483	253060	20	10	AT2G31750.1;AT2G31750.2	AT2G31750.1;AT2G31750.2	962
NaN	NaN	NaN	NaN	NaN	NaN				-1	1	1	1	5.1	5.1	5.1	59.447	0.0059712	6.0366	2352800	30	3	AT2G31760.1	AT2G31760.1	963
NaN	NaN	NaN	NaN	NaN	NaN				-1	1	1	1	3.5	3.5	3.5	51.631	0.0011338	6.9566	33906	23	2	AT2G31790.1	AT2G31790.1	964
14.9624	15.1861	15.1071	NaN	NaN	NaN				-1	4	4	4	14.7	14.7	14.7	53.737	0	28.014	288760	29	11	AT2G31800.1	AT2G31800.1	965
16.0303	15.5445	16.0011	15.7973	15.8539	15.6545				-1	7	7	7	20.6	20.6	20.6	53.872	0	56.258	1178000	30	28	AT2G31810.1;AT2G31810.2;AT2G31810.3	AT2G31810.1;AT2G31810.2;AT2G31810.3	966
NaN	NaN	NaN	NaN	NaN	NaN				-1	1	1	1	1.3	1.3	1.3	164.56	0.0011223	6.8652	11963	83	4	AT2G31900.5;AT4G33200.2;AT4G33200.3;AT4G33200.1;AT4G33200.4;AT2G31900.4;AT2G31900.1;AT2G31900.2	AT2G31900.5;AT4G33200.2;AT4G33200.3;AT4G33200.1;AT4G33200.4;AT2G31900.4;AT2G31900.1;AT2G31900.2	967
NaN	NaN	NaN	NaN	NaN	NaN				-1	4	2	2	3.4	2	2	221.23	0	11.708	26067	102	2	AT2G31960.4;AT2G31960.5;AT2G31960.3;AT2G31960.2;AT2G31960.1	AT2G31960.4;AT2G31960.5;AT2G31960.3;AT2G31960.2;AT2G31960.1	968
NaN	NaN	NaN	NaN	NaN	NaN				-1	1	1	1	8.7	8.7	8.7	26.759	0.0011274	6.8979	41847	12	1	AT2G31985.1	AT2G31985.1	969
NaN	NaN	NaN	17.2842	17.1755	17.2805				-1	37	37	36	40	40	38.9	148.61	0	323.31	6560100	94	109	AT2G32240.1	AT2G32240.1	970
17.9745	17.832	17.8507	18.1288	18.1395	18.0893				-1	11	11	10	50.3	50.3	46.7	38.485	0	179.45	6093600	16	65	AT2G32260.1;AT2G32260.2	AT2G32260.1;AT2G32260.2	971
15.8547	15.5109	16.0474	15.5793	15.6038	15.0407				-1	7	7	5	18.5	18.5	13.6	90.228	0	102.95	1327400	43	35	AT2G32450.1	AT2G32450.1	972
NaN	NaN	NaN	NaN	NaN	NaN				-1	2	2	1	16.9	16.9	12	24.331	0	11.961	22624	10	1	AT2G32520.3;AT2G32520.1;AT2G32520.4;AT2G32520.2	AT2G32520.3;AT2G32520.1;AT2G32520.4;AT2G32520.2	973
17.9217	17.9886	18.1322	16.5588	16.6646	16.653				-1	12	12	7	24.1	24.1	12.2	108.98	0	212.22	5476300	38	71	AT2G32730.1	AT2G32730.1	974
NaN	NaN	NaN	NaN	NaN	NaN				-1	2	2	2	5.4	5.4	5.4	72.442	0	11.118	25100	41	2	AT2G32850.1;AT2G32850.2	AT2G32850.1;AT2G32850.2	975
NaN	NaN	NaN	17.2175	17.1918	17.1761				-1	8	8	8	19.4	19.4	19.4	83.933	0	174.78	989390	45	17	AT2G32900.1	AT2G32900.1	976
16.6607	16.9584	16.9627	NaN	NaN	NaN				-1	2	2	2	4.5	4.5	4.5	47.754	0	45.965	598920	18	9	AT2G32920.1	AT2G32920.1	977
18.1659	17.919	18.1753	17.9757	18.1206	18.0888				-1	3	3	3	22.8	22.8	22.8	35.448	0	40.059	2620000	19	19	AT2G33040.1	AT2G33040.1	978
15.981	15.8576	16.0126	15.661	15.6255	15.6081				-1	5	5	5	22.3	22.3	22.3	48.578	0	100.81	1380500	23	33	AT2G33150.1	AT2G33150.1	979
18.4621	18.4636	18.4651	18.0223	17.9939	18.1052				-1	14	8	8	38.8	26.7	26.7	61.477	0	208.04	3846200	35	39	AT2G33210.2;AT2G33210.1	AT2G33210.2;AT2G33210.1	980
15.6931	15.5437	15.8582	15.3886	15.4205	15.6825				-1	6	6	6	24.4	24.4	24.4	56.727	0	104.27	807190	28	21	AT2G33340.1;AT2G33340.2;AT2G33340.3	AT2G33340.1;AT2G33340.2;AT2G33340.3	981
19.2556	19.0908	19.1701	19.2911	19.3138	19.2614				-1	10	10	10	64.8	64.8	64.8	13.406	0	230.19	10363000	8	78	AT3G04400.2;AT2G33370.2;AT3G04400.1;AT2G33370.1;AT1G04480.1	AT3G04400.2;AT2G33370.2;AT3G04400.1;AT2G33370.1;AT1G04480.1	982
NaN	NaN	NaN	NaN	NaN	NaN				-1	3	3	3	14.7	14.7	14.7	16.033	0	18.85	341650	9	7	AT2G33450.1	AT2G33450.1	983
NaN	NaN	NaN	NaN	NaN	NaN				-1	1	1	1	8.4	8.4	8.4	22.74	0.0076495	5.9594	285630	15	7	AT2G33470.2;AT2G33470.1	AT2G33470.2;AT2G33470.1	984
NaN	NaN	NaN	NaN	NaN	NaN				-1	2	2	2	13.1	13.1	13.1	35.614	0	14.955	271390	12	6	AT2G33600.1;AT2G33590.1	AT2G33600.1;AT2G33590.1	985
NaN	15.8585	15.6408	NaN	NaN	NaN				-1	1	1	1	2.7	2.7	2.7	85.276	0	25.743	268770	38	8	AT2G33730.1	AT2G33730.1	986
21.211	20.4528	20.2037	20.2088	20.3206	20.3654				-1	9	9	9	38.6	38.6	38.6	32.645	0	173.31	16465000	17	36	AT2G33800.1	AT2G33800.1	987
15.8321	NaN	NaN	16.2352	NaN	16.22				-1	3	3	3	2.3	2.3	2.3	141.79	0	47.733	450110	64	11	AT2G34357.1	AT2G34357.1	988
21.2853	21.4021	21.1932	21.059	21.1297	20.9425				-1	7	7	0	40.4	40.4	0	28.054	0	203.41	30782000	8	59	AT2G34420.1	AT2G34420.1	989
18.8502	18.7998	18.6984	18.717	18.6154	18.7665				-1	7	2	2	41.7	6.8	6.8	28.17	0	99.924	3611300	8	13	AT2G34430.1	AT2G34430.1	990
NaN	NaN	NaN	NaN	NaN	NaN				-1	1	1	1	4.6	4.6	4.6	30.471	0.0022059	6.6314	30081	15	3	AT2G34460.1	AT2G34460.1	991
NaN	NaN	NaN	NaN	NaN	NaN				-1	4	4	4	26.9	26.9	26.9	30.082	0	26.44	128440	17	7	AT2G34470.1;AT2G34470.2	AT2G34470.1;AT2G34470.2	992
19.5082	19.3783	19.5417	19.8258	20.1385	19.9738				-1	8	4	2	48.9	29.2	17.4	21.307	0	166.79	8506000	8	31	AT2G34480.1;AT2G34480.2	AT2G34480.1;AT2G34480.2	993
NaN	NaN	NaN	15.7193	15.7082	NaN				-1	3	3	3	13.3	13.3	13.3	42.872	0	32.658	424780	23	10	AT2G34560.1;AT2G34560.2	AT2G34560.1;AT2G34560.2	994
NaN	NaN	NaN	NaN	NaN	NaN				-1	1	1	1	4.9	4.9	4.9	60.895	0.00041649	8.6575	10565	23	1	AT2G34640.1	AT2G34640.1	995
15.8435	15.5511	15.7663	NaN	14.2056	NaN				-1	5	5	4	7.3	7.3	6.2	149.01	0	40.06	519390	62	14	AT2G34660.3;AT2G34660.2;AT2G34660.1	AT2G34660.3;AT2G34660.2;AT2G34660.1	996
NaN	NaN	NaN	15.6037	15.7469	15.5788				-1	6	6	6	7.5	7.5	7.5	186.86	0	60.102	544700	95	16	AT2G34680.1;AT2G34680.2	AT2G34680.1;AT2G34680.2	997
NaN	NaN	NaN	NaN	15.7442	15.6805				-1	4	4	4	6.2	6.2	6.2	81.863	0	66.806	364240	36	12	AT2G34970.1;AT4G18300.1	AT2G34970.1	998
NaN	NaN	NaN	NaN	NaN	NaN				-1	2	2	2	7	7	7	59.471	0	12.422	64152	29	4	AT2G35040.2;AT2G35040.1	AT2G35040.2;AT2G35040.1	999
NaN	NaN	NaN	NaN	NaN	NaN				-1	1	1	1	4	4	4	50.782	0	18.408	49928	24	4	AT2G35100.1	AT2G35100.1	1000
14.8677	14.832	14.9988	14.8447	14.6958	14.8244				-1	5	5	5	7.2	7.2	7.2	155.75	0	77.444	586050	67	23	AT2G35110.2;AT2G35110.1	AT2G35110.2;AT2G35110.1	1001
15.1409	14.973	15.4855	15.4225	15.2982	15.3067				-1	5	5	5	21.3	21.3	21.3	47.855	0	55.127	544710	23	18	AT2G35840.4;AT2G35840.3;AT2G35840.2;AT2G35840.1	AT2G35840.4;AT2G35840.3;AT2G35840.2;AT2G35840.1	1002
15.4639	15.5381	15.5665	15.3034	15.1606	NaN				-1	2	2	2	20.7	20.7	20.7	18.232	0	14.604	348500	7	11	AT2G36130.1	AT2G36130.1	1003
NaN	NaN	NaN	NaN	NaN	NaN				-1	2	1	1	3.3	1.9	1.9	113.68	0.00076894	7.162	225090	55	4	AT2G36200.1;AT2G36200.2;AT2G28620.3;AT2G28620.2;AT2G28620.1	AT2G36200.1;AT2G36200.2;AT2G28620.3;AT2G28620.2;AT2G28620.1	1004
NaN	NaN	NaN	15.152	15.1276	15.0049				-1	2	2	2	5.4	5.4	5.4	55.04	0	13.809	203280	31	6	AT2G36360.2;AT2G36360.1;AT2G36360.3;AT2G36360.5;AT2G36360.4	AT2G36360.2;AT2G36360.1;AT2G36360.3;AT2G36360.5;AT2G36360.4	1005
16.402	16.6862	16.769	16.5346	16.7999	17.0839				-1	5	5	5	9.3	9.3	9.3	97.659	0	81.501	1054500	47	20	AT2G36390.1	AT2G36390.1	1006
NaN	NaN	NaN	NaN	NaN	NaN				-1	4	1	1	28.6	8.9	8.9	21.959	0	34.045	798050	7	6	AT2G36410.2;AT2G36410.1;AT2G36410.3	AT2G36410.2;AT2G36410.1;AT2G36410.3	1007
17.6974	17.6915	17.9446	18.538	18.6304	18.7089				-1	22	13	13	74.3	43.6	43.6	38.386	0	300.93	9511000	23	69	AT2G36460.1;AT2G36460.3;AT2G36460.2	AT2G36460.1;AT2G36460.3;AT2G36460.2	1008
17.4476	17.4608	17.5423	18.2511	18.255	18.3731				-1	18	18	18	68.2	68.2	68.2	47.719	0	283.38	7646600	25	77	AT2G36530.1;AT2G36530.2	AT2G36530.1;AT2G36530.2	1009
16.5136	16.2538	15.7346	16.6888	16.732	16.8981				-1	7	7	2	22.2	22.2	6.5	57.508	0	144.61	1819800	31	31	AT2G36580.1	AT2G36580.1	1010
19.2038	19.1471	19.0368	19.3335	NaN	19.3256				-1	4	4	4	17.8	17.8	17.8	18.632	0	88.416	4714300	5	16	AT3G53020.1;AT2G36620.1	AT3G53020.1;AT2G36620.1	1011
NaN	NaN	NaN	NaN	NaN	NaN				-1	1	1	1	10.6	10.6	10.6	24.987	0.0039511	6.2805	21746	13	1	AT2G36680.1	AT2G36680.1	1012
NaN	NaN	NaN	NaN	NaN	NaN				-1	1	1	1	3	3	3	55.798	0.00042863	10.013	45645	25	2	AT2G36800.1;AT2G36790.1	AT2G36800.1;AT2G36790.1	1013
17.9367	17.9063	17.8585	17.2814	17.3066	17.18				-1	9	5	5	7.1	4.2	4.2	218.38	0	61.788	1988400	96	23	AT2G36850.1	AT2G36850.1	1014
19.2014	19.1189	19.1958	19.5957	19.5523	19.5715				-1	23	23	14	78.7	78.7	65.4	42.497	0	323.31	18722000	20	133	AT2G36880.2;AT2G36880.1	AT2G36880.2;AT2G36880.1	1015
NaN	NaN	NaN	NaN	NaN	NaN				-1	1	1	1	8.9	8.9	8.9	25.384	0	34.217	65729	8	2	AT2G36900.3;AT2G36900.2;AT2G36900.1	AT2G36900.3;AT2G36900.2;AT2G36900.1	1016
NaN	NaN	NaN	NaN	NaN	NaN				-1	2	2	2	3.8	3.8	3.8	140.57	0	15.23	164610	60	7	AT2G36910.1	AT2G36910.1	1017
16.47	16.4704	NaN	NaN	NaN	NaN				-1	2	2	2	3.5	3.5	3.5	103.48	0	48.011	310300	45	5	AT2G37050.1;AT2G37050.3	AT2G37050.1;AT2G37050.3	1018
NaN	NaN	NaN	15.3327	15.3181	15.2956				-1	2	2	2	6.5	6.5	6.5	65.616	0	93.302	189600	36	8	AT2G37080.3;AT2G37080.2;AT2G37080.1	AT2G37080.3;AT2G37080.2;AT2G37080.1	1019
NaN	NaN	NaN	NaN	NaN	NaN				-1	1	1	1	6.1	6.1	6.1	33.272	0	15.226	757060	15	6	AT2G37130.2;AT2G37130.1	AT2G37130.2;AT2G37130.1	1020
18.0199	18.6207	18.6035	NaN	17.6199	NaN				-1	2	1	1	16.8	4.6	4.6	30.453	0	15.546	1693700	7	11	AT2G37170.1	AT2G37170.1	1021
NaN	NaN	NaN	NaN	NaN	NaN				-1	1	1	1	9	9	9	17.97	0.00039448	7.4807	501060	9	5	AT3G53430.1;AT2G37190.1	AT3G53430.1;AT2G37190.1	1022
14.3294	NaN	NaN	14.36	14.5043	14.7131				-1	2	2	2	14.2	14.2	14.2	30.718	0	50.044	215780	14	10	AT2G37220.1	AT2G37220.1	1023
NaN	NaN	NaN	NaN	NaN	NaN				-1	1	1	1	4.6	4.6	4.6	31.038	0.00039108	7.3447	363990	18	6	AT2G37250.1	AT2G37250.1	1024
NaN	18.5237	17.4477	18.0375	18.1867	18.1568				-1	9	2	2	58	15.5	15.5	22.99	0	50.775	3068000	11	25	AT2G37270.2;AT2G37270.1	AT2G37270.2;AT2G37270.1	1025
NaN	NaN	NaN	NaN	NaN	NaN				-1	2	2	1	14.8	14.8	9.5	25.571	0.00042409	9.476	29577	11	1	AT2G37410.2;AT2G37410.1	AT2G37410.2;AT2G37410.1	1026
NaN	NaN	NaN	NaN	NaN	NaN				-1	2	2	2	5.5	5.5	5.5	49.251	0	12.852	222740	32	5	AT2G37550.2;AT2G37550.1;AT3G53710.3;AT3G53710.2;AT3G53710.1	AT2G37550.2;AT2G37550.1;AT3G53710.3;AT3G53710.2;AT3G53710.1	1027
NaN	NaN	NaN	NaN	NaN	NaN				-1	13	2	2	35.5	8.5	8.5	41.797	0	12.794	151010	21	5	AT3G53750.2;AT3G53750.1;AT2G37620.4;AT2G37620.3;AT2G37620.2;AT2G37620.1;AT5G59370.2;AT5G59370.1;AT3G46520.2;AT3G46520.1	AT3G53750.2;AT3G53750.1;AT2G37620.4;AT2G37620.3;AT2G37620.2;AT2G37620.1;AT5G59370.2;AT5G59370.1;AT3G46520.2;AT3G46520.1	1028
NaN	NaN	NaN	NaN	NaN	NaN				-1	1	1	1	7.2	7.2	7.2	29.831	0.0096752	5.9165	101540	18	4	AT2G37760.7;AT2G37760.6;AT2G37760.4;AT2G37760.3;AT2G37760.5;AT2G37760.2;AT2G37760.1	AT2G37760.7;AT2G37760.6;AT2G37760.4;AT2G37760.3;AT2G37760.5;AT2G37760.2;AT2G37760.1	1029
NaN	NaN	NaN	NaN	NaN	NaN				-1	4	4	4	28.5	28.5	28.5	27.352	0	39.959	793930	17	10	AT2G37970.1	AT2G37970.1	1030
15.2856	15.946	NaN	NaN	15.058	NaN				-1	1	1	1	5	5	5	35.53	0	13.933	278530	16	8	AT2G37990.1	AT2G37990.1	1031
NaN	NaN	NaN	NaN	NaN	NaN				-1	1	1	1	3.3	3.3	3.3	24.019	0.0011416	7.0419	326990	11	5	AT2G38025.2;AT2G38025.1	AT2G38025.2;AT2G38025.1	1032
21.3834	21.2848	21.4334	21.415	21.4063	21.5324				-1	72	72	72	80.4	80.4	80.4	85.305	0	323.31	214070000	45	552	AT2G38040.2;AT2G38040.1	AT2G38040.2;AT2G38040.1	1033
NaN	NaN	NaN	NaN	NaN	NaN				-1	1	1	1	5.4	5.4	5.4	43.297	0.00041911	8.858	743520	10	5	AT2G38170.2;AT2G38170.1;AT2G38170.3	AT2G38170.2;AT2G38170.1;AT2G38170.3	1034
NaN	NaN	NaN	NaN	NaN	NaN				-1	2	1	1	41.8	22.8	22.8	8.1414	0.00039714	7.6331	64295	5	3	AT2G38210.1;AT2G38230.1	AT2G38210.1;AT2G38230.1	1035
NaN	15.7164	NaN	15.8028	NaN	15.7198				-1	4	4	4	21.2	21.2	21.2	32.205	0	36.973	574850	17	13	AT2G38270.1	AT2G38270.1	1036
NaN	NaN	NaN	NaN	NaN	NaN				-1	1	1	1	2	2	2	95.128	0.00042827	9.9862	71634	42	3	AT2G38280.2;AT2G38280.1	AT2G38280.2;AT2G38280.1	1037
NaN	NaN	NaN	NaN	NaN	NaN				-1	1	1	1	1.3	1.3	1.3	151.58	0	18.378	46087	52	3	AT2G38440.1	AT2G38440.1	1038
NaN	NaN	NaN	NaN	NaN	NaN				-1	1	1	1	2.5	2.5	2.5	52.534	0.0076709	5.9797	4954.7	19	1	AT2G38510.1	AT2G38510.1	1039
NaN	NaN	NaN	NaN	NaN	NaN				-1	1	1	1	13.6	13.6	13.6	11.938	0	18.627	278540	6	6	AT2G38530.1	AT2G38530.1	1040
NaN	NaN	NaN	NaN	NaN	NaN				-1	1	1	1	10.2	10.2	10.2	11.755	0.00042355	9.3728	171560	5	6	AT2G38540.1	AT2G38540.1	1041
16.8924	16.7717	16.7895	16.4897	16.4501	16.3817				-1	6	6	6	24	24	24	46.977	0	106.64	1455400	21	29	AT2G38670.1	AT2G38670.1	1042
NaN	NaN	NaN	NaN	NaN	NaN				-1	1	1	1	3.9	3.9	3.9	34.226	0.0011442	7.0675	36631	13	2	AT3G54250.2;AT2G38700.1;AT3G54250.1	AT3G54250.2;AT2G38700.1;AT3G54250.1	1043
15.7829	16.2176	NaN	NaN	16.2335	16.6207				-1	5	5	4	33.2	33.2	23.2	36.221	0	46.707	661450	16	15	AT2G38750.1;AT2G38750.2	AT2G38750.1;AT2G38750.2	1044
15.8397	15.9305	16.0841	15.7079	15.6663	15.8892				-1	9	9	9	10.9	10.9	10.9	173.02	0	151.76	1318000	72	37	AT2G38770.1	AT2G38770.1	1045
16.8585	16.7169	17.2086	16.2151	16.4156	16.3582				-1	6	6	6	27.1	27.1	27.1	42.729	0	133.39	1412700	19	27	AT2G38860.2;AT2G38860.1;AT2G38860.3	AT2G38860.2;AT2G38860.1;AT2G38860.3	1046
NaN	NaN	NaN	NaN	NaN	NaN				-1	1	1	1	3.7	3.7	3.7	58.599	0.00042265	9.2119	31968	20	4	AT2G38940.1	AT2G38940.1	1047
16.3421	16.9471	17.0819	16.0259	16.213	15.9008				-1	9	9	9	31.5	31.5	31.5	45.107	0	81.657	1791700	23	36	AT2G39140.1;AT2G39140.2	AT2G39140.1;AT2G39140.2	1048
NaN	14.5871	15.0812	NaN	NaN	NaN				-1	2	2	2	10.7	10.7	10.7	35.704	0	12.075	97859	17	5	AT2G39420.1	AT2G39420.1	1049
18.0416	18.0359	17.3976	18.1877	18.3522	18.3995				-1	7	7	7	39.2	39.2	39.2	16.744	0	44.473	2696200	5	25	AT3G55280.3;AT3G55280.2;AT3G55280.1;AT2G39460.2;AT2G39460.1	AT3G55280.3;AT3G55280.2;AT3G55280.1;AT2G39460.2;AT2G39460.1	1050
NaN	NaN	NaN	NaN	NaN	NaN				-1	1	1	1	10.9	10.9	10.9	19.677	0.0042918	6.2224	11890000	12	3	AT2G39470.3;AT2G39470.2;AT2G39470.1	AT2G39470.3;AT2G39470.2;AT2G39470.1	1051
16.2252	16.2431	16.1601	15.6183	15.6488	15.6893				-1	5	5	3	6.2	6.2	3.7	136.14	0	55.429	959750	59	20	AT2G39480.2;AT2G39480.1	AT2G39480.2;AT2G39480.1	1052
20.105	20.0566	20.0896	20.0998	20.0679	20.1982				-1	22	22	1	68.2	68.2	3.1	49.1	0	323.31	35411000	19	146	AT2G39730.2	AT2G39730.2	1054
NaN	15.0066	15.1824	14.6831	14.6882	14.5056				-1	4	4	4	21.6	21.6	21.6	39.577	0	40.035	396750	16	15	AT2G39770.3;AT2G39770.2;AT2G39770.1	AT2G39770.3;AT2G39770.2;AT2G39770.1	1055
NaN	NaN	NaN	NaN	NaN	NaN				-1	1	1	1	8.5	8.5	8.5	21.901	0	11.188	285070	14	4	AT2G39900.1	AT2G39900.1	1056
NaN	NaN	NaN	NaN	NaN	NaN				-1	2	2	2	12	12	12	28.837	0	12.175	502620	11	6	AT2G40060.1	AT2G40060.1	1057
NaN	NaN	NaN	NaN	NaN	NaN				-1	2	1	1	6.7	3.5	3.5	66.153	0.0076735	5.9806	24097	29	1	AT2G40140.2;AT2G40140.1	AT2G40140.2;AT2G40140.1	1058
NaN	NaN	NaN	NaN	NaN	NaN				-1	1	1	1	5.2	5.2	5.2	52.572	0.00040568	8.0107	129370	22	4	AT2G40190.1	AT2G40190.1	1059
16.7236	16.9797	16.6818	16.7441	16.3408	16.6276				-1	7	7	7	24.4	24.4	24.4	38.747	0	74.91	1581400	20	24	AT2G40290.1;AT2G40290.3;AT2G40290.2	AT2G40290.1;AT2G40290.3;AT2G40290.2	1060
NaN	NaN	NaN	NaN	NaN	NaN				-1	2	2	2	4.6	4.6	4.6	83.531	0	12.255	28893	31	2	AT2G40360.2;AT2G40360.1	AT2G40360.2;AT2G40360.1	1061
NaN	NaN	NaN	NaN	NaN	NaN				-1	3	3	3	19.8	19.8	19.8	33.601	0	22.502	241540	12	8	AT2G40430.3;AT2G40430.1;AT2G40430.2	AT2G40430.3;AT2G40430.1;AT2G40430.2	1062
NaN	NaN	17.5192	NaN	NaN	17.3829				-1	3	3	3	17.5	17.5	17.5	43.579	0	23.209	927930	19	9	AT2G40490.1	AT2G40490.1	1063
18.4883	18.5861	18.6367	18.5514	18.4344	18.3327				-1	1	1	1	11.5	11.5	11.5	14.628	0	39.851	3044300	5	13	AT3G56340.1;AT2G40590.1;AT2G40510.1	AT3G56340.1;AT2G40590.1;AT2G40510.1	1064
16.8451	17.0488	17.2166	16.6008	16.6335	16.3573				-1	5	5	5	14.6	14.6	14.6	43.172	0	68.409	1739300	17	22	AT2G40650.1	AT2G40650.1	1065
NaN	NaN	NaN	NaN	NaN	NaN				-1	3	3	3	14.7	14.7	14.7	42.088	0	27.143	92481	24	4	AT2G40660.1	AT2G40660.1	1066
NaN	NaN	NaN	15.3697	15.6032	NaN				-1	3	3	3	6.9	6.9	6.9	86.045	0	55.091	339790	35	9	AT2G40730.1	AT2G40730.1	1067
NaN	NaN	NaN	NaN	NaN	NaN				-1	3	2	2	12.7	12.7	12.7	41.736	0	12.087	105810	24	5	AT2G40800.1;AT2G40800.2	AT2G40800.1	1068
14.4383	14.8702	NaN	15.2546	15.1533	15.1914				-1	9	9	9	15	15	15	109.78	0	58.418	542870	47	22	AT2G40840.1	AT2G40840.1	1069
16.4036	16.53	16.4151	NaN	NaN	NaN				-1	5	5	5	13.6	13.6	13.6	57.926	0	36.644	734010	27	12	AT2G40890.1	AT2G40890.1	1070
NaN	NaN	NaN	NaN	NaN	NaN				-1	1	1	1	2.1	2.1	2.1	69.105	0	20.189	51913	31	2	AT2G40980.1	AT2G40980.1	1071
15.1583	15.1158	NaN	15.2773	15.3364	15.282				-1	3	3	3	24.9	24.9	24.9	32.801	0	25.154	358470	16	14	AT2G41100.7;AT2G41100.6;AT2G41100.3;AT2G41100.4;AT2G41100.1;AT2G41100.5;AT2G41100.2	AT2G41100.7;AT2G41100.6;AT2G41100.3;AT2G41100.4;AT2G41100.1	1072
NaN	NaN	14.1217	NaN	13.9985	14.0621				-1	2	2	2	6.6	6.6	6.6	64.314	0	16.108	143620	37	10	AT2G41140.1;AT2G46700.3;AT2G46700.2;AT3G56760.1;AT2G46700.1;AT3G19100.1;AT3G50530.1;AT1G49580.1;AT3G50530.2	AT2G41140.1;AT2G46700.3;AT2G46700.2;AT3G56760.1;AT2G46700.1;AT3G19100.1;AT3G50530.1;AT1G49580.1;AT3G50530.2	1073
NaN	NaN	NaN	15.3756	NaN	15.3272				-1	2	2	2	11.1	11.1	11.1	33.494	0	33.385	179170	18	5	AT2G41350.1;AT2G41350.2	AT2G41350.1;AT2G41350.2	1074
NaN	NaN	NaN	NaN	NaN	NaN				-1	1	1	1	10.2	10.2	10.2	31.655	0.00040584	8.0285	66937	15	3	AT2G41530.1	AT2G41530.1	1075
17.0797	16.9523	16.9754	NaN	NaN	NaN				-1	5	5	4	5.7	5.7	4.7	112.75	0	43.917	847940	43	11	AT2G41560.1;AT2G41560.4;AT2G41560.3;AT2G41560.2;AT3G57330.2	AT2G41560.1;AT2G41560.4;AT2G41560.3;AT2G41560.2	1076
NaN	NaN	NaN	NaN	NaN	NaN				-1	1	1	1	4.3	4.3	4.3	57.949	0.0011464	7.0832	52201	20	2	AT2G41680.1	AT2G41680.1	1077
NaN	NaN	NaN	14.5423	NaN	14.7019				-1	2	2	2	3	3	3	107.84	0	49.62	87043	56	4	AT2G41740.2;AT2G41740.1	AT2G41740.2;AT2G41740.1	1078
NaN	NaN	NaN	15.9429	15.8108	15.546				-1	4	4	4	6.2	6.2	6.2	110.99	0	107.11	521730	45	14	AT2G41790.1	AT2G41790.1	1079
17.3992	17.3578	17.5559	16.8398	16.9987	16.782				-1	2	2	2	10.3	10.3	10.3	40.37	0	24.004	1638700	18	18	AT2G41800.1	AT2G41800.1	1080
18.8189	18.6484	18.8022	19.2698	19.039	18.9255				-1	10	10	4	42.1	42.1	20	30.878	0	174.52	8861400	16	58	AT2G41840.1	AT2G41840.1	1081
18.0946	17.9995	18.0067	17.896	17.6625	17.7412				-1	14	14	13	34.9	34.9	32.3	77.991	0	323.31	4099000	33	50	AT2G41900.1	AT2G41900.1	1082
15.8196	15.9532	16.1133	15.9121	15.9293	15.9835				-1	1	1	1	17	17	17	16.999	0	31.979	502090	8	12	AT2G42210.5;AT2G42210.4;AT2G42210.3;AT2G42210.1;AT2G42210.2	AT2G42210.5;AT2G42210.4;AT2G42210.3;AT2G42210.1;AT2G42210.2	1083
NaN	NaN	NaN	NaN	NaN	NaN				-1	1	1	1	2.4	2.4	2.4	86.69	0.0004085	8.1626	33897	41	2	AT2G42490.1	AT2G42490.1	1084
NaN	NaN	NaN	NaN	NaN	NaN				-1	7	2	2	37.7	11.2	11.2	35.832	0	14.897	145860	16	5	AT2G42500.1;AT2G42500.2	AT2G42500.1;AT2G42500.2	1085
15.5223	15.1624	15.9009	16.2972	16.117	16.2253				-1	4	3	3	27	23.2	23.2	29.52	0	43.355	859490	15	17	AT2G42590.1;AT2G42590.2;AT2G42590.3	AT2G42590.1;AT2G42590.2;AT2G42590.3	1086
NaN	NaN	NaN	15.865	15.8212	15.9588				-1	17	10	10	28.1	19.6	19.6	109.75	0	137.57	1061600	58	26	AT2G42600.3;AT2G42600.2;AT2G42600.1	AT2G42600.3;AT2G42600.2;AT2G42600.1	1087
NaN	NaN	NaN	NaN	NaN	NaN				-1	1	1	1	12	12	12	15.582	0.0025427	6.4811	32886	9	1	AT3G58680.1;AT2G42680.1	AT3G58680.1;AT2G42680.1	1088
NaN	NaN	NaN	NaN	15.7817	15.514				-1	4	4	4	10.1	10.1	10.1	85.408	0	31.402	364560	35	9	AT2G42700.3;AT2G42700.1;AT2G42700.2	AT2G42700.3;AT2G42700.1;AT2G42700.2	1089
18.3475	18.3936	18.599	18.304	18.5261	18.1692				-1	8	8	8	41.9	41.9	41.9	19.775	0	97.134	7812000	7	47	AT5G45775.1;AT5G45775.2;AT4G18730.1;AT3G58700.1;AT2G42740.1	AT5G45775.1;AT5G45775.2;AT4G18730.1;AT3G58700.1;AT2G42740.1	1090
NaN	NaN	NaN	NaN	NaN	NaN				-1	2	1	1	6.9	2.6	2.6	56.175	0.0076415	5.9552	27718	23	1	AT2G42790.1	AT2G42790.1	1091
NaN	19.2954	18.8216	19.2086	19.2496	18.9864				-1	3	3	3	18.1	18.1	18.1	29.363	0	60.68	4790600	17	22	AT2G43030.1	AT2G43030.1	1092
NaN	NaN	NaN	NaN	NaN	NaN				-1	1	1	1	5.9	5.9	5.9	35.538	0.00042808	9.9631	17775	12	2	AT2G43120.1;AT2G43120.2	AT2G43120.1;AT2G43120.2	1093
15.7332	NaN	15.5173	NaN	NaN	NaN				-1	2	2	2	17.3	17.3	17.3	23.981	0	25.067	184260	19	5	AT2G43130.1	AT2G43130.1	1094
NaN	NaN	NaN	NaN	NaN	NaN				-1	1	1	1	12.3	12.3	12.3	23.387	0.005	6.1992	40229	11	3	AT2G43140.1;AT2G43140.2	AT2G43140.1;AT2G43140.2	1095
17.8302	17.762	17.8146	NaN	NaN	NaN				-1	8	8	8	13.5	13.5	13.5	95.477	0	173.49	3382000	22	27	AT2G43160.5;AT2G43160.3;AT2G43160.2;AT2G43160.1;AT2G43160.4;AT3G59290.1	AT2G43160.5;AT2G43160.3;AT2G43160.2;AT2G43160.1;AT2G43160.4	1096
22.135	22.0624	22.2162	21.4919	21.6034	21.3347				-1	5	5	5	46.4	46.4	46.4	8.1216	0	236.12	45246000	3	53	AT3G59540.1;AT2G43460.1	AT3G59540.1;AT2G43460.1	1097
NaN	NaN	NaN	NaN	NaN	NaN				-1	1	1	1	21.3	21.3	21.3	10.192	0.0011507	7.1432	20809	4	1	AT2G43550.1	AT2G43550.1	1098
NaN	NaN	NaN	NaN	NaN	NaN				-1	2	2	2	5.5	5.5	5.5	73.972	0	13.284	209570	27	6	AT2G43650.1	AT2G43650.1	1099
NaN	NaN	NaN	NaN	NaN	NaN				-1	1	1	1	2.4	2.4	2.4	74.281	0.0011244	6.8735	21829	33	2	AT2G43680.5;AT2G43680.4;AT2G43680.3;AT2G43680.2;AT2G43680.1	AT2G43680.5;AT2G43680.4;AT2G43680.3;AT2G43680.2;AT2G43680.1	1100
14.0586	14.7987	14.7804	14.541	14.6155	15.0901				-1	4	4	2	16.5	16.5	8.5	45.65	0	44.488	316290	23	15	AT2G43710.2;AT2G43710.1	AT2G43710.2;AT2G43710.1	1101
NaN	NaN	NaN	15.5558	NaN	15.6742				-1	2	2	2	20.7	20.7	20.7	22.216	0	14.38	347720	14	8	AT2G43760.3;AT2G43760.2;AT2G43760.1	AT2G43760.3;AT2G43760.2;AT2G43760.1	1102
16.0348	16.0218	16.2528	15.9441	15.9509	16.1575				-1	4	4	4	19	19	19	37.885	0	35.87	1088000	19	26	AT2G43770.1	AT2G43770.1	1103
NaN	NaN	NaN	NaN	NaN	NaN				-1	1	1	1	4.1	4.1	4.1	45.057	0.0025632	6.5893	103050	19	4	AT2G43790.1	AT2G43790.1	1104
NaN	NaN	NaN	NaN	NaN	NaN				-1	2	2	2	7.8	7.8	7.8	50.771	0	13.478	41995	13	3	AT2G43820.1	AT2G43820.1	1105
NaN	NaN	NaN	17.0839	NaN	16.6882				-1	2	2	2	15.2	15.2	15.2	24.096	0	12.915	413590	14	7	AT2G43910.2;AT2G43910.1	AT2G43910.2;AT2G43910.1	1106
NaN	NaN	NaN	NaN	NaN	NaN				-1	1	1	1	3	3	3	37.706	0.0032468	6.3801	4384.1	16	1	AT2G43950.2;AT2G43950.1	AT2G43950.2;AT2G43950.1	1107
15.272	15.8023	NaN	NaN	15.2259	NaN				-1	3	3	3	10.6	10.6	10.6	58.731	0	26.534	309870	24	12	AT2G43970.2;AT2G43970.1	AT2G43970.2;AT2G43970.1	1108
NaN	NaN	NaN	NaN	NaN	NaN				-1	1	1	1	7.2	7.2	7.2	37.55	0.00039936	7.7448	65810	16	4	AT2G44040.1	AT2G44040.1	1109
18.1311	18.1729	18.1889	17.9563	18.0581	17.9894				-1	14	14	14	58.2	58.2	58.2	36.036	0	323.31	6499100	23	73	AT2G44060.2;AT2G44060.1	AT2G44060.2;AT2G44060.1	1110
15.1191	15.2589	NaN	NaN	NaN	NaN				-1	3	3	3	15.4	15.4	15.4	22.842	0	40.461	193760	12	10	AT2G44065.3;AT2G44065.2;AT2G44065.1	AT2G44065.3;AT2G44065.2;AT2G44065.1	1111
16.4634	16.406	16.5365	16.0265	16.0355	16.2021				-1	9	5	5	37.6	20.4	20.4	48.438	0	50.319	835770	21	17	AT2G44100.2;AT2G44100.1;AT5G09550.1	AT2G44100.2;AT2G44100.1	1112
20.6883	20.8202	20.9533	20.1481	20.2035	20.0164				-1	15	15	6	58.3	58.3	21.1	27.939	0	307.95	23323000	14	84	AT2G44120.1;AT2G44120.2	AT2G44120.1;AT2G44120.2	1113
NaN	NaN	NaN	16.3456	16.5316	16.5544				-1	9	6	6	26.4	21.4	21.4	66.801	0	89.266	1011700	36	18	AT2G44160.1	AT2G44160.1	1114
17.0117	17.1212	17.1362	16.8454	16.8467	16.7934				-1	9	9	9	19.5	19.5	19.5	57.784	0	140.62	2440200	30	45	AT2G44200.1	AT2G44200.1	1115
NaN	NaN	NaN	NaN	NaN	NaN				-1	1	1	1	5.6	5.6	5.6	40.278	0	11.789	281400	20	11	AT2G44270.1	AT2G44270.1	1116
14.8132	14.9792	15.1515	15.8562	15.599	15.6368				-1	4	4	4	45.1	45.1	45.1	15.821	0	46.038	757540	7	21	AT2G44310.1	AT2G44310.1	1117
NaN	NaN	NaN	14.6508	NaN	14.7043				-1	3	3	3	16.7	16.7	16.7	52.654	0	22.547	187770	23	7	AT2G44350.4;AT2G44350.1;AT2G44350.3;AT2G44350.2	AT2G44350.4;AT2G44350.1;AT2G44350.3;AT2G44350.2	1118
NaN	NaN	NaN	14.6617	NaN	14.7283				-1	4	4	4	14.3	14.3	14.3	63.915	0	25.331	162350	23	8	AT2G44490.1	AT2G44490.1	1119
16.6131	16.0797	16.4024	NaN	NaN	15.7445				-1	2	2	2	14.4	14.4	14.4	23.13	0	51.934	587140	14	11	AT2G44610.1;AT5G64990.1;AT5G10260.1;AT2G22290.1;AT4G39890.1	AT2G44610.1;AT5G64990.1;AT5G10260.1;AT2G22290.1;AT4G39890.1	1120
NaN	NaN	NaN	NaN	NaN	NaN				-1	1	1	1	5.1	5.1	5.1	49.83	0.0086415	5.9203	92732	24	4	AT2G44640.1	AT2G44640.1	1121
NaN	NaN	NaN	NaN	NaN	NaN				-1	1	1	1	6.6	6.6	6.6	30.337	0.0011503	7.1309	28610	13	1	AT2G45060.1	AT2G45060.1	1122
15.1075	NaN	NaN	15.9854	15.5808	15.8735				-1	3	3	3	20.5	20.5	20.5	26.442	0	85.141	458290	15	11	AT2G45140.1;AT2G45140.2	AT2G45140.1;AT2G45140.2	1123
NaN	NaN	NaN	NaN	NaN	NaN				-1	1	1	1	6.7	6.7	6.7	13.955	0.0066527	6.0066	89695	7	1	AT2G45180.1	AT2G45180.1	1124
15.7805	15.5157	15.7226	16.3299	16.2195	16.1472				-1	15	15	13	9.4	9.4	8.3	321.93	0	144.62	1504600	131	46	AT2G45540.6;AT2G45540.5;AT2G45540.4;AT2G45540.3;AT2G45540.1;AT2G45540.2	AT2G45540.6;AT2G45540.5;AT2G45540.4;AT2G45540.3;AT2G45540.1;AT2G45540.2	1125
19.491	19.3137	19.3184	19.2161	19.1773	19.2202				-1	4	4	3	46.4	46.4	31	9.405	0	76.118	10782000	3	27	AT2G45710.1;AT3G61110.1;AT3G61111.2;AT3G61111.1	AT2G45710.1;AT3G61110.1;AT3G61111.2;AT3G61111.1	1126
NaN	14.7379	NaN	NaN	15.099	NaN				-1	5	5	5	26	26	26	27.761	0	37.056	291990	15	11	AT2G45790.1	AT2G45790.1	1127
17.7016	17.6071	17.3033	15.7629	NaN	16.0276				-1	7	7	7	41.1	41.1	41.1	20.968	0	65.78	1276000	12	20	AT2G45820.1	AT2G45820.1	1128
20.6431	20.8461	21.1322	19.4128	19.9548	19.6758				-1	4	4	1	25.9	25.9	6.6	29.132	0	159.24	11225000	8	26	AT2G45960.2;AT2G45960.1;AT2G45960.3;AT1G01620.1;AT4G00430.1;AT4G00430.2;AT1G01620.2;AT4G23400.1	AT2G45960.2;AT2G45960.1;AT2G45960.3;AT1G01620.1;AT4G00430.1;AT4G00430.2	1129
NaN	NaN	NaN	NaN	NaN	NaN				-1	1	1	1	6.6	6.6	6.6	17.846	0.00039604	7.5671	98878	7	1	AT2G46140.1	AT2G46140.1	1130
16.4746	16.1449	16.2633	17.1946	17.1274	17.3336				-1	11	11	11	55.5	55.5	55.5	36.388	0	112.61	2060200	17	40	AT2G46280.2;AT2G46280.1;AT2G46280.3;AT2G46290.1	AT2G46280.2;AT2G46280.1;AT2G46280.3	1131
NaN	NaN	NaN	NaN	NaN	NaN				-1	3	3	3	5.7	5.7	5.7	108.66	0	22.034	123970	49	5	AT2G46520.1	AT2G46520.1	1132
NaN	NaN	NaN	14.4864	NaN	14.3031				-1	3	3	3	2.5	2.5	2.5	248.44	0	41.38	98852	98	6	AT2G46560.3;AT2G46560.2;AT2G46560.1	AT2G46560.3;AT2G46560.2;AT2G46560.1	1133
15.1238	NaN	NaN	NaN	NaN	15.3472				-1	3	3	3	14.5	14.5	14.5	43.246	0	37.416	304240	23	9	AT2G46630.1	AT2G46630.1	1134
15.9121	15.7191	16.0212	16.423	16.6391	16.5288				-1	3	3	3	38.6	38.6	38.6	14.873	0	47.927	1060900	7	25	AT2G46650.1	AT2G46650.1	1135
NaN	NaN	NaN	NaN	NaN	NaN				-1	1	1	1	1.9	1.9	1.9	95.57	0.00041085	8.3014	19793	37	1	AT2G46920.4;AT2G46920.3;AT2G46920.2;AT2G46920.1	AT2G46920.4;AT2G46920.3;AT2G46920.2;AT2G46920.1	1136
19.3426	19.3134	19.3734	18.3099	18.2393	18.192				-1	24	24	17	26.5	26.5	20.8	139.03	0	323.31	17081000	59	113	AT2G47000.6;AT2G47000.5;AT2G47000.1;AT2G47000.2;AT2G47000.4;AT2G47000.7;AT2G47000.3;AT4G01830.2;AT4G01830.1;AT4G01820.1;AT4G18050.1;AT4G18050.2;AT4G01820.2;AT1G27940.2;AT1G27940.1;AT5G46540.1	AT2G47000.6;AT2G47000.5;AT2G47000.1;AT2G47000.2;AT2G47000.4;AT2G47000.7;AT2G47000.3	1137
16.2848	16.3537	16.5053	16.4578	16.5041	16.6293				-1	4	4	4	26.8	26.8	26.8	17.797	0	86.112	1423400	7	27	AT3G62250.1;AT2G47110.1;AT2G47110.2;AT4G05320.4;AT4G05320.2;AT5G20620.1;AT4G05320.3;AT4G05320.6;AT3G52590.1;AT2G36170.1;AT4G02890.3;AT1G65350.1;AT5G03240.1;AT5G03240.3;AT5G20620.2;AT5G03240.2;AT4G05320.5;AT4G05320.1;AT4G02890.4;AT4G05320.8;AT4G05050.4;AT4G05320.7;AT2G35635.1;AT1G23410.1;AT1G31340.1;AT5G37640.1;AT4G02890.1;AT4G02890.2;AT4G05050.1;AT4G05050.2;AT4G05050.3;AT1G55060.1;AT3G09790.1;AT3…	AT3G62250.1;AT2G47110.1;AT2G47110.2;AT4G05320.4;AT4G05320.2;AT5G20620.1;AT4G05320.3;AT4G05320.6;AT3G52590.1;AT2G36170.1;AT4G02890.3;AT1G65350.1;AT5G03240.1;AT5G03240.3;AT5G20620.2;AT5G03240.2;AT4G05320.5;AT4G05320.1;AT4G02890.4;AT4G05320.8;AT4G05050.4;AT4G05320.7;AT2G35635.1;AT1G23410.1;AT1G31340.1;AT5G37640.1;AT4G02890.1;AT4G02890.2;AT4G05050.1;AT4G05050.2;AT4G05050.3;AT1G55060.1	1138
16.3769	16.1291	15.7159	19.8181	19.9985	19.5967				-1	32	32	32	49.8	49.8	49.8	74.597	0	323.31	20484000	33	114	AT2G47240.3;AT2G47240.2;AT2G47240.1;AT2G47240.4	AT2G47240.3;AT2G47240.2;AT2G47240.1;AT2G47240.4	1139
NaN	NaN	NaN	NaN	NaN	NaN				-1	1	1	1	1.7	1.7	1.7	106.26	0.0014914	6.8198	147070	47	6	AT2G47390.1	AT2G47390.1	1140
NaN	NaN	NaN	NaN	NaN	NaN				-1	1	1	1	10.5	10.5	10.5	13.487	0	19.995	172640	4	5	AT2G47400.1	AT2G47400.1	1141
NaN	NaN	NaN	NaN	NaN	NaN				-1	1	1	1	7.5	7.5	7.5	41.279	0	14.45	99743	20	4	AT2G47450.1	AT2G47450.1	1142
17.3977	17.4999	16.7968	16.9137	17.035	17.1897				-1	10	10	10	39.9	39.9	39.9	35.62	0	147.12	2309100	18	35	AT2G47470.3;AT2G47470.1;AT2G47470.4;AT2G47470.2	AT2G47470.3;AT2G47470.1;AT2G47470.4;AT2G47470.2	1143
NaN	15.3884	NaN	15.6533	15.4968	15.6126				-1	6	6	6	26.4	26.4	26.4	52.999	0	70.306	415860	26	17	AT2G47510.3;AT2G47510.2;AT2G47510.1;AT5G50950.4;AT5G50950.2;AT5G50950.1	AT2G47510.3;AT2G47510.2;AT2G47510.1	1144
NaN	NaN	NaN	NaN	NaN	NaN				-1	4	4	4	12.5	12.5	12.5	48.878	0	22.964	151570	26	6	AT2G47590.1	AT2G47590.1	1145
18.3342	18.691	18.7324	19.3614	19.5157	19.4981				-1	5	5	1	22.6	22.6	7.8	29.129	0	113.89	7515900	11	38	AT2G47610.1	AT2G47610.1	1146
NaN	NaN	NaN	NaN	NaN	NaN				-1	1	1	1	14.8	14.8	14.8	12.507	0.00077489	7.2609	79993	6	3	AT3G62840.2;AT2G47640.3;AT2G47640.2;AT3G62840.1;AT2G47640.4;AT2G47640.1	AT3G62840.2;AT2G47640.3;AT2G47640.2;AT3G62840.1;AT2G47640.4;AT2G47640.1	1147
17.5872	17.4871	17.5387	17.0673	NaN	17.0957				-1	5	5	5	17.6	17.6	17.6	49.945	0	76.346	1373400	27	20	AT2G47650.1;AT2G47650.2;AT3G62830.2;AT3G62830.1	AT2G47650.1;AT2G47650.2;AT3G62830.2;AT3G62830.1	1148
15.6173	15.6323	15.4475	15.049	15.1492	15.0257				-1	4	4	4	6.4	6.4	6.4	115.08	0	34.47	625060	43	19	AT2G47680.1	AT2G47680.1	1149
17.4173	17.4486	17.3779	17.8901	17.8357	17.7964				-1	11	11	11	62.4	62.4	62.4	29.231	0	188.58	5739400	14	62	AT2G47730.2;AT2G47730.1	AT2G47730.2;AT2G47730.1	1150
NaN	NaN	NaN	NaN	NaN	NaN				-1	1	1	1	4.1	4.1	4.1	66.673	0	12.213	135860	25	3	AT2G47940.2;AT2G47940.1	AT2G47940.2;AT2G47940.1	1151
16.2224	16.2161	16.3619	16.2452	16.3163	16.3651				-1	5	5	5	18.3	18.3	18.3	49.289	0	73.01	1253400	26	24	AT2G47960.1	AT2G47960.1	1152
NaN	NaN	NaN	15.6033	15.806	15.9492				-1	4	4	4	18.6	18.6	18.6	39.787	0	55.241	362940	17	10	AT2G47970.2;AT2G47970.1	AT2G47970.2;AT2G47970.1	1153
NaN	NaN	NaN	NaN	NaN	NaN				-1	1	1	1	3.2	3.2	3.2	58.902	0.0018443	6.6679	4680.5	22	1	AT2G47990.1	AT2G47990.1	1154
NaN	NaN	NaN	NaN	NaN	NaN				-1	1	1	1	2.4	2.4	2.4	81.492	0	13.767	188370	33	6	AT3G01160.1	AT3G01160.1	1155
15.8236	15.6302	15.8795	15.7253	15.6359	15.8734				-1	6	6	5	37.7	37.7	33	29.425	0	57.665	1039600	14	23	AT3G01280.1	AT3G01280.1	1156
18.8696	18.5211	19.0112	18.6774	18.7187	18.4826				-1	9	7	7	38.9	29.8	29.8	31.321	0	116.34	8956000	20	41	AT3G01290.1	AT3G01290.1	1157
17.7681	17.6843	17.6892	17.2653	17.2665	17.1776				-1	28	28	28	40.7	40.7	40.7	118.92	0	323.31	6675200	62	101	AT3G01310.2;AT3G01310.1;AT3G01310.3;AT5G15070.4;AT5G15070.1;AT5G15070.5;AT5G15070.2;AT5G15070.3;AT5G15070.7;AT5G15070.6	AT3G01310.2;AT3G01310.1;AT3G01310.3	1158
NaN	NaN	NaN	16.448	16.3084	16.4177				-1	6	6	5	42.1	42.1	34.4	32.63	0	79.964	936050	16	16	AT3G01340.2;AT3G01340.1	AT3G01340.2;AT3G01340.1	1159
NaN	NaN	NaN	NaN	NaN	NaN				-1	1	1	1	1.6	1.6	1.6	113.66	0.0003962	7.5858	144380	58	4	AT3G01370.1	AT3G01370.1	1160
18.1978	18.3221	18.3101	20.3598	20.2326	20.3629				-1	11	11	11	81.8	81.8	81.8	12.397	0	323.31	16959000	5	53	AT3G01390.4;AT3G01390.3;AT3G01390.2;AT3G01390.1	AT3G01390.4;AT3G01390.3;AT3G01390.2;AT3G01390.1	1161
NaN	NaN	NaN	NaN	NaN	NaN				-1	1	1	1	3.4	3.4	3.4	73.157	0.0042949	6.2264	23586	36	1	AT3G01420.1	AT3G01420.1	1162
NaN	NaN	NaN	NaN	NaN	NaN				-1	1	1	1	3.7	3.7	3.7	40.037	0.0046462	6.2151	20163	18	1	AT3G01490.2;AT3G01490.1	AT3G01490.2;AT3G01490.1	1163
16.8615	15.7256	NaN	17.3635	17.3075	17.3372				-1	13	4	4	58.3	25.1	25.1	28.198	0	129.79	1296600	14	16	AT3G01500.4;AT3G01500.1;AT3G01500.3;AT3G01500.2	AT3G01500.4;AT3G01500.1;AT3G01500.3;AT3G01500.2	1164
NaN	NaN	NaN	NaN	NaN	NaN				-1	2	2	2	5	5	5	67.64	0	16.9	122390	37	4	AT3G01540.1;AT3G01540.4;AT3G01540.3;AT3G01540.2	AT3G01540.1;AT3G01540.4;AT3G01540.3;AT3G01540.2	1165
21.2125	21.2924	20.8878	NaN	15.8659	16.4103				-1	7	7	7	29.5	29.5	29.5	19.754	0	250.96	17426000	5	41	AT3G01570.1	AT3G01570.1	1166
14.1856	13.6789	13.9238	16.6293	16.815	16.7878				-1	13	13	13	18.1	18.1	18.1	130.91	0	150.25	1883700	63	45	AT3G01780.1;AT3G01780.2	AT3G01780.1;AT3G01780.2	1167
NaN	NaN	NaN	NaN	NaN	NaN				-1	2	2	2	17.6	17.6	17.6	23.38	0	13.997	270970	13	5	AT3G01790.2;AT3G01790.1	AT3G01790.2;AT3G01790.1	1168
15.9764	16.4045	16.2303	15.475	14.7326	15.0867				-1	4	4	4	26.6	26.6	26.6	29.172	0	57.304	909270	16	22	AT3G01800.1	AT3G01800.1	1169
NaN	NaN	NaN	NaN	NaN	NaN				-1	1	1	1	7.8	7.8	7.8	33.539	0.00041237	8.3928	55623	18	2	AT3G01920.1;AT3G01920.2	AT3G01920.1;AT3G01920.2	1170
19.7726	19.8619	19.9038	19.3099	19.3987	19.203				-1	9	6	4	49.7	32.2	23.8	15.828	0	199.76	18982000	9	46	AT3G02080.1	AT3G02080.1	1171
16.6694	16.5442	16.7179	16.3035	16.47	16.5992				-1	10	10	10	35.8	35.8	35.8	59.159	0	110.54	1747800	27	35	AT3G02090.1;AT3G02090.2	AT3G02090.1;AT3G02090.2	1172
NaN	NaN	NaN	15.0159	NaN	14.9595				-1	2	2	2	10.4	10.4	10.4	41.156	0	20.662	156280	22	5	AT3G02200.1;AT3G02200.2	AT3G02200.1;AT3G02200.2	1173
15.5269	15.1518	15.5756	14.5697	14.7145	NaN				-1	2	2	2	8.8	8.8	8.8	25.615	0	26.21	282350	10	11	AT3G02220.1	AT3G02220.1	1174
15.1608	15.4415	14.7628	16.3249	16.2341	16.216				-1	12	12	12	3.7	3.7	3.7	565.6	0	165.71	1194600	258	40	AT3G02260.2;AT3G02260.3;AT3G02260.4;AT3G02260.1	AT3G02260.2;AT3G02260.3;AT3G02260.4;AT3G02260.1	1175
17.4962	17.5283	17.634	17.6977	17.6806	17.8587				-1	9	9	8	33.1	33.1	29	53.577	0	93.651	2985700	27	44	AT3G02360.2;AT3G02360.1	AT3G02360.2;AT3G02360.1	1176
NaN	NaN	NaN	NaN	NaN	NaN				-1	1	1	1	27.9	27.9	27.9	7.1448	0.0014842	6.7475	23915	4	2	AT3G02480.1	AT3G02480.1	1177
NaN	NaN	NaN	NaN	NaN	NaN				-1	10	3	3	39.2	14	14	29.824	0	26.214	855420	16	8	AT3G02520.2;AT3G02520.1	AT3G02520.2;AT3G02520.1	1178
17.0721	16.8153	16.9789	17.9772	17.9268	17.9916				-1	13	13	4	28.8	28.8	9.3	58.949	0	195.72	4428200	29	60	AT3G02530.1	AT3G02530.1	1179
19.5239	19.8275	19.837	19.2552	19.1872	19.109				-1	11	10	10	56	55.5	55.5	22.196	0	159.54	9381400	8	62	AT3G02560.3;AT3G02560.2;AT3G02560.1	AT3G02560.3;AT3G02560.2;AT3G02560.1	1180
20.271	20.2642	20.358	19.7833	19.7841	19.6114				-1	10	10	10	41.4	41.4	41.4	48.565	0	323.31	20141000	17	93	AT3G02570.1;AT1G67070.3;AT1G67070.2;AT1G67070.1	AT3G02570.1	1181
NaN	NaN	NaN	NaN	NaN	NaN				-1	2	2	2	5.7	5.7	5.7	63.837	0	13.124	205210	31	6	AT3G02650.1	AT3G02650.1	1182
NaN	NaN	NaN	15.0677	14.9577	14.7757				-1	4	4	4	7.9	7.9	7.9	97.536	0	48.08	214740	52	9	AT3G02760.2;AT3G02760.1	AT3G02760.2;AT3G02760.1	1183
NaN	NaN	18.0538	17.8231	NaN	NaN				-1	1	1	1	10.2	10.2	10.2	17.836	0	20.752	1468900	10	8	AT3G02770.1	AT3G02770.1	1184
17.8327	17.7709	17.7334	17.6953	17.7216	17.7309				-1	8	8	6	36.3	36.3	27.5	32.607	0	110.32	2315900	19	32	AT3G02780.1;AT3G02780.2	AT3G02780.1;AT3G02780.2	1185
NaN	NaN	NaN	14.6183	14.7196	14.8392				-1	3	3	3	21.4	21.4	21.4	29.121	0	33.212	192550	15	7	AT3G02870.1;AT3G02870.3;AT3G02870.2	AT3G02870.1;AT3G02870.3;AT3G02870.2	1186
17.6743	17.4274	17.669	16.516	16.6419	16.8226				-1	14	14	10	33.5	33.5	25.4	67.752	0	146.62	3084500	38	55	AT3G02880.1	AT3G02880.1	1187
NaN	NaN	NaN	15.8672	15.922	16.0154				-1	11	9	9	22.9	20.5	20.5	91.617	0	112.01	886730	45	24	AT3G02930.2;AT3G02930.3;AT3G02930.1	AT3G02930.2;AT3G02930.3;AT3G02930.1	1188
NaN	NaN	NaN	NaN	NaN	NaN				-1	2	2	2	2.1	2.1	2.1	128.59	0	12.707	87117	57	3	AT3G03050.1	AT3G03050.1	1189
NaN	NaN	NaN	NaN	NaN	NaN				-1	1	1	1	1.1	1.1	1.1	121.47	0.0004042	7.9225	76276	49	3	AT5G17020.2;AT5G17020.1;AT3G03110.1	AT5G17020.2;AT5G17020.1;AT3G03110.1	1190
16.3583	16.2729	16.7046	17.1328	17.0614	17.2155				-1	6	6	6	20.3	20.3	20.3	51.115	0	135.62	1627300	27	29	AT3G03250.3;AT3G03250.1;AT3G03250.2;AT5G17310.6;AT5G17310.4;AT5G17310.3;AT5G17310.5;AT5G17310.1;AT5G17310.2	AT3G03250.3;AT3G03250.1;AT3G03250.2	1191
17.8615	17.9067	17.961	17.4355	17.2413	17.4794				-1	8	8	8	70.4	70.4	70.4	17.439	0	261.93	3820900	8	41	AT3G03270.2;AT3G03270.1	AT3G03270.2;AT3G03270.1	1192
18.1897	18.6292	18.4017	18.0782	17.9326	17.7982				-1	14	14	8	50.6	50.6	33.3	38.407	0	323.31	7483200	24	62	AT3G03340.3;AT3G03340.1;AT3G03340.2	AT3G03340.3;AT3G03340.1;AT3G03340.2	1193
NaN	NaN	NaN	NaN	NaN	NaN				-1	1	1	1	11.3	11.3	11.3	28.289	0	11.302	35640	15	2	AT3G03490.1	AT3G03490.1	1194
NaN	NaN	NaN	NaN	NaN	NaN				-1	1	1	1	3.8	3.8	3.8	47.382	0	13.351	106080	20	3	AT3G03520.2;AT3G03520.1	AT3G03520.2;AT3G03520.1	1195
17.2447	17.0267	17.3793	17.9428	17.99	18.1154				-1	30	7	7	42.1	17.6	17.6	84.583	0	89.404	2752000	39	31	AT3G03780.3;AT3G03780.2;AT3G03780.1	AT3G03780.3;AT3G03780.2;AT3G03780.1	1196
16.3546	NaN	16.558	16.0856	16.1658	15.7699				-1	5	5	5	33.2	33.2	33.2	20.982	0	41.055	705170	10	17	AT3G03920.1;AT5G18180.1	AT3G03920.1	1197
15.804	15.7509	15.8413	16.1188	16.0495	16.1658				-1	9	9	9	30.6	30.6	30.6	58.939	0	258.63	1787400	32	46	AT3G03960.1	AT3G03960.1	1198
NaN	NaN	NaN	19.0327	19.0646	19.1057				-1	27	4	4	78.4	18.9	18.9	36.914	0	73.058	3695700	21	13	AT3G04120.1	AT3G04120.1	1199
NaN	NaN	NaN	NaN	NaN	NaN				-1	4	1	1	24	9.6	9.6	16.586	0.00039777	7.6499	80111	11	1	AT3G04230.1	AT3G04230.1	1200
NaN	NaN	NaN	NaN	NaN	NaN				-1	1	1	1	0.9	0.9	0.9	152.26	0.00078125	7.3215	59965	67	2	AT3G04340.1	AT3G04340.1	1201
NaN	NaN	NaN	NaN	NaN	NaN				-1	2	2	2	4.2	4.2	4.2	71.5	0	53.941	224460	34	7	AT3G04470.1	AT3G04470.1	1202
NaN	15.7708	NaN	14.4831	14.4849	14.0929				-1	2	2	2	20.2	20.2	20.2	19.305	0	34.035	315070	6	10	AT3G04500.2;AT3G04500.3;AT3G04500.1	AT3G04500.2;AT3G04500.3;AT3G04500.1	1203
14.9637	15.4413	14.6401	17.3585	17.4905	17.27				-1	10	10	10	46.6	46.6	46.6	38.123	0	181.88	1850400	20	32	AT3G04520.2;AT3G04520.3;AT3G04520.1	AT3G04520.2;AT3G04520.3;AT3G04520.1	1204
NaN	NaN	NaN	NaN	NaN	NaN				-1	1	1	1	4.2	4.2	4.2	45.754	0	18.688	48865	24	3	AT3G04600.3;AT3G04600.2;AT3G04600.1	AT3G04600.3;AT3G04600.2;AT3G04600.1	1205
16.3104	16.6876	16.5209	15.8913	15.7761	NaN				-1	2	2	2	9.7	9.7	9.7	52.362	0	27.444	641920	23	11	AT3G04650.1	AT3G04650.1	1206
NaN	NaN	NaN	NaN	NaN	NaN				-1	1	1	1	17	17	17	19.67	0	11.127	224130	8	6	AT3G04780.1	AT3G04780.1	1207
16.1113	15.9587	15.9586	15.925	15.6175	15.892				-1	3	3	3	18.1	18.1	18.1	29.305	0	47.392	899320	17	17	AT3G04790.1	AT3G04790.1	1208
NaN	NaN	NaN	NaN	NaN	NaN				-1	2	2	2	9.7	9.7	9.7	33.286	0	11.567	51749	12	2	AT3G04830.2;AT3G04830.1	AT3G04830.2;AT3G04830.1	1209
18.2394	18.2931	18.3733	18.1233	18.2473	18.1514				-1	13	13	7	49.6	49.6	31.3	29.85	0	230.96	7742800	15	58	AT3G04840.1	AT3G04840.1	1210
NaN	NaN	NaN	NaN	NaN	NaN				-1	1	1	1	2.7	2.7	2.7	61.633	0	13.572	221930	28	6	AT3G04870.4;AT3G04870.3;AT3G04870.2;AT3G04870.1	AT3G04870.4;AT3G04870.3;AT3G04870.2;AT3G04870.1	1211
NaN	NaN	NaN	NaN	NaN	NaN				-1	1	1	1	3.1	3.1	3.1	65.184	0.00040177	7.8245	77860	25	4	AT3G04910.3;AT3G04910.2;AT3G04910.1	AT3G04910.3;AT3G04910.2;AT3G04910.1	1212
18.3973	18.1685	18.1208	17.8045	17.7947	17.6962				-1	5	5	3	37.5	37.5	26.8	12.909	0	89.521	5433100	5	34	AT3G04920.2;AT3G04920.1	AT3G04920.2;AT3G04920.1	1213
16.5084	16.3822	16.652	15.7783	15.6014	15.3246				-1	2	2	2	18.6	18.6	18.6	25.61	0	39.73	608300	11	12	AT3G04950.1	AT3G04950.1	1214
18.1222	18.2118	18.0815	18.039	18.0548	18.1634				-1	8	8	8	61.3	61.3	61.3	19.572	0	195.02	4551400	8	38	AT3G05000.1	AT3G05000.1	1215
15.994	16.4214	16.3322	15.9852	15.9523	15.9298				-1	8	8	8	22.5	22.5	22.5	59.002	0	95.117	1262700	26	32	AT3G05060.1	AT3G05060.1	1216
NaN	NaN	NaN	NaN	16.4027	16.4656				-1	3	3	3	8.4	8.4	8.4	82.196	0	35.542	384050	34	6	AT3G05090.3;AT3G05090.2;AT3G05090.1	AT3G05090.3;AT3G05090.2;AT3G05090.1	1217
NaN	NaN	13.7165	NaN	14.0107	14.2154				-1	2	2	2	4.9	4.9	4.9	69.645	0	38.314	134310	39	8	AT3G05270.3;AT3G05270.2;AT3G05270.1	AT3G05270.3;AT3G05270.2;AT3G05270.1	1218
NaN	NaN	NaN	NaN	NaN	NaN				-1	24	1	1	49.1	2.4	2.4	73.074	0.0079806	5.9501	102150	40	2	AT3G05420.1;AT5G27630.2;AT5G27630.1;AT5G27630.4;AT5G27630.3	AT3G05420.1	1219
15.6165	15.699	15.2985	17.0317	17.1358	16.9879				-1	24	24	1	49.2	49.2	2.5	73.202	0	264.31	4716000	40	89	AT3G05420.2	AT3G05420.2	1220
20.0922	20.0743	19.8605	18.5544	18.4897	18.4826				-1	23	23	10	60.8	60.8	26.9	47.48	0	323.31	21128000	25	116	AT3G05530.1	AT3G05530.1	1221
19.1652	18.9815	19.1598	18.7117	19.0094	18.9017				-1	12	12	5	66.4	66.4	40.3	14.857	0	309.98	8932100	7	56	AT3G05590.3;AT3G05590.2;AT3G05590.1;AT2G47570.1	AT3G05590.3;AT3G05590.2;AT3G05590.1	1222
NaN	NaN	NaN	15.1056	15.0053	15.0585				-1	4	4	4	24.8	24.8	24.8	36.981	0	32.942	259870	15	12	AT3G05710.2;AT3G05710.1;AT4G02195.1	AT3G05710.2;AT3G05710.1	1223
17.2892	17.218	17.0588	17.3946	17.2736	17.4676				-1	20	20	20	42.1	42.1	42.1	73.453	0	283.4	4741600	44	77	AT3G05900.1;AT3G05900.2	AT3G05900.1;AT3G05900.2	1224
NaN	NaN	NaN	NaN	NaN	NaN				-1	3	3	3	14.5	14.5	14.5	46.326	0	23.168	64121	21	4	AT3G05910.1;AT3G05910.2;AT5G26670.4;AT5G26670.3;AT5G26670.2;AT5G26670.1	AT3G05910.1;AT3G05910.2	1225
NaN	NaN	NaN	NaN	NaN	NaN				-1	1	1	1	3.1	3.1	3.1	76.603	0	45.402	248480	34	5	AT3G05970.1	AT3G05970.1	1226
15.3135	NaN	14.9268	NaN	14.5906	14.7897				-1	4	4	4	33.8	33.8	33.8	21.445	0	39.453	279700	12	12	AT3G06050.1;AT3G06050.2	AT3G06050.1;AT3G06050.2	1227
NaN	NaN	NaN	NaN	NaN	NaN				-1	2	2	2	8.2	8.2	8.2	87.809	0	10.794	5668300	43	4	AT3G06250.3;AT3G06250.2;AT3G06250.1	AT3G06250.3;AT3G06250.2;AT3G06250.1	1228
18.4908	18.1823	18.3884	17.2268	17.4575	17.3569				-1	15	15	15	64.7	64.7	64.7	38.329	0	323.31	7048100	17	75	AT3G06270.1	AT3G06270.1	1229
NaN	NaN	NaN	NaN	NaN	NaN				-1	1	1	1	5.7	5.7	5.7	33.019	0	34.62	231500	14	5	AT3G06300.1	AT3G06300.1	1230
NaN	NaN	NaN	NaN	NaN	NaN				-1	3	3	3	7.9	7.9	7.9	70.778	0	17.039	260960	33	7	AT3G06510.1;AT3G06510.2	AT3G06510.1;AT3G06510.2	1231
NaN	14.806	NaN	15.0702	NaN	NaN				-1	4	4	4	11.3	11.3	11.3	54.34	0	33.429	208950	24	9	AT3G06580.1	AT3G06580.1	1232
17.2427	NaN	16.1303	NaN	15.4389	NaN				-1	4	4	4	49.6	49.6	49.6	12.795	0	65.135	772590	6	12	AT3G06610.1	AT3G06610.1	1233
17.1398	17.3159	17.3313	16.6976	16.8718	16.6847				-1	10	6	6	38.2	28.4	28.4	58.644	0	70.084	1632200	23	25	AT3G06720.2;AT3G06720.1;AT4G02150.2;AT4G02150.1	AT3G06720.2;AT3G06720.1	1235
NaN	15.2466	NaN	15.0416	NaN	NaN				-1	1	1	1	9.8	9.8	9.8	20.67	0.00042427	9.5002	293170	8	9	AT3G06730.1	AT3G06730.1	1236
NaN	14.2884	14.5094	14.8992	14.8564	15.0886				-1	4	4	4	9.3	9.3	9.3	91.712	0	57.109	351600	47	16	AT3G06810.1	AT3G06810.1	1237
NaN	NaN	NaN	NaN	NaN	NaN				-1	2	2	2	7.2	7.2	7.2	52.706	0	21.207	62369	25	5	AT3G06850.2;AT3G06850.1	AT3G06850.2;AT3G06850.1	1238
16.1989	16.3123	16.2866	15.7934	15.8264	15.7672				-1	3	3	3	9.5	9.5	9.5	78.839	0	44.245	942760	39	18	AT3G06860.1	AT3G06860.1	1239
NaN	NaN	NaN	NaN	NaN	NaN				-1	1	1	1	3.4	3.4	3.4	59.786	0.0014942	6.8429	69644	24	2	AT3G06930.1;AT3G06930.2	AT3G06930.1;AT3G06930.2	1240
18.2019	17.2007	17.424	16.7374	16.9892	16.9346				-1	5	5	5	24	24	24	52.822	0	41.849	1916300	24	17	AT3G06960.1;AT3G06960.2	AT3G06960.1;AT3G06960.2	1241
NaN	NaN	NaN	NaN	NaN	NaN				-1	3	3	3	5.2	5.2	5.2	87.428	0	35.652	298710	36	9	AT3G06980.1	AT3G06980.1	1242
18.4206	18.4134	18.2437	17.1344	17.0231	16.8033				-1	13	13	13	36.4	36.4	36.4	61.06	0	165.34	4234600	29	41	AT3G07020.3;AT3G07020.2;AT3G07020.1	AT3G07020.3;AT3G07020.2;AT3G07020.1	1243
15.8564	16.0522	15.5935	15.219	14.9033	NaN				-1	5	5	5	13.1	13.1	13.1	65.785	0	38.975	676660	31	17	AT3G07050.1	AT3G07050.1	1244
16.9396	16.8657	16.9253	16.5584	16.605	16.5698				-1	9	9	9	13.1	13.1	13.1	113.96	0	181.3	1637100	45	34	AT3G07100.1	AT3G07100.1	1245
17.2248	16.7211	17.0991	17.1233	17.2523	17.2217				-1	8	8	3	31.1	31.1	24.3	23.466	0	85.388	2422500	11	39	AT3G07110.1;AT3G07110.2	AT3G07110.1;AT3G07110.2	1246
17.3957	17.2657	17.3186	15.455	15.4561	15.469				-1	20	20	16	16.1	16.1	13.2	217.08	0	227.73	3442400	94	67	AT3G07160.1;AT3G07160.3;AT3G07160.2;AT4G04970.1;AT4G03550.1	AT3G07160.1;AT3G07160.3;AT3G07160.2	1247
NaN	NaN	NaN	NaN	NaN	NaN				-1	1	1	1	6.5	6.5	6.5	20.735	0.0042965	6.2298	95880	11	2	AT3G07170.2;AT3G07170.1	AT3G07170.2;AT3G07170.1	1248
NaN	NaN	NaN	NaN	NaN	NaN				-1	1	1	1	21.7	21.7	21.7	5.3049	0.0011446	7.0676	99400	1	2	AT3G07230.1	AT3G07230.1	1249
NaN	NaN	NaN	17.696	17.6116	17.6101				-1	2	2	2	8.4	8.4	8.4	43.598	0	47.205	1283100	16	11	AT3G07300.1;AT3G07300.2;AT3G07300.3	AT3G07300.1;AT3G07300.2;AT3G07300.3	1250
NaN	NaN	NaN	NaN	NaN	NaN				-1	1	1	1	6	6	6	24.32	0.00041459	8.5216	215510	18	3	AT3G07410.1	AT3G07410.1	1251
NaN	NaN	NaN	NaN	NaN	NaN				-1	1	1	1	1.8	1.8	1.8	60.698	0.0025557	6.5472	60114	26	3	AT3G07420.2;AT3G07420.1	AT3G07420.2;AT3G07420.1	1252
NaN	NaN	NaN	15.7875	15.6259	NaN				-1	2	2	2	15.1	15.1	15.1	17.602	0	48.001	436800	9	8	AT3G07480.1	AT3G07480.1	1253
NaN	NaN	NaN	NaN	NaN	NaN				-1	1	1	1	12	12	12	20.628	0.00041684	8.7027	50700	6	3	AT3G07565.2;AT3G07565.1;AT3G07565.3;AT3G07565.4	AT3G07565.2;AT3G07565.1;AT3G07565.3;AT3G07565.4	1254
NaN	NaN	NaN	NaN	NaN	NaN				-1	1	1	1	4.6	4.6	4.6	35.685	0.0022083	6.638	43830	18	2	AT3G07720.1	AT3G07720.1	1255
15.2042	14.7047	NaN	NaN	14.9005	15.0701				-1	5	4	4	10.3	8.5	8.5	90.566	0	37.828	305980	47	13	AT3G07770.3;AT3G07770.2;AT3G07770.1	AT3G07770.3;AT3G07770.2;AT3G07770.1	1256
16.1608	15.8346	NaN	15.9991	NaN	15.9728				-1	7	7	7	35.3	35.3	35.3	34.7	0	58.766	735660	15	18	AT3G08030.2;AT3G08030.1	AT3G08030.2;AT3G08030.1	1257
18.4985	18.4336	18.3353	16.861	17.1249	16.8522				-1	16	16	16	45.5	45.5	45.5	62.477	0	210.8	8329200	29	79	AT3G08510.4;AT3G08510.3;AT3G08510.2;AT3G08510.1;AT3G55940.1	AT3G08510.4;AT3G08510.3;AT3G08510.2;AT3G08510.1	1258
17.4418	17.0293	17.4539	18.2904	18.3405	18.2413				-1	24	24	7	25.3	25.3	9.7	193.27	0	323.31	5139300	88	82	AT3G08530.1	AT3G08530.1	1259
18.9993	19.0039	19.0944	18.8911	18.8083	18.7666				-1	12	12	7	30.2	30.2	23.1	41.475	0	296.41	17710000	22	74	AT3G08580.2;AT3G08580.1;AT4G28390.2;AT4G28390.1	AT3G08580.2;AT3G08580.1	1260
16.328	16.0159	16.2576	17.212	17.3476	16.9221				-1	21	11	11	60.5	40.5	40.5	60.763	0	323.31	2299100	32	44	AT3G08590.2;AT3G08590.1	AT3G08590.2;AT3G08590.1	1261
NaN	NaN	NaN	17.1067	17.1827	NaN				-1	5	5	5	13.3	13.3	13.3	69.406	0	44.121	671920	30	11	AT3G08680.2;AT3G08680.1	AT3G08680.2;AT3G08680.1	1262
NaN	NaN	NaN	NaN	NaN	NaN				-1	1	1	1	2.6	2.6	2.6	56.501	0.00041254	8.3964	224020	9	6	AT5G01460.1;AT3G08930.1	AT5G01460.1;AT3G08930.1	1263
16.6333	15.9321	16.4723	16.0705	16.2732	16.1458				-1	4	2	2	22	9.8	9.8	31.193	0	27.172	883140	15	12	AT3G08940.2;AT3G08940.1;AT2G40100.2;AT2G40100.1	AT3G08940.2;AT3G08940.1	1264
NaN	14.8304	NaN	16.3812	16.3649	16.3286				-1	4	4	4	9.3	9.3	9.3	94.127	0	94.152	710690	34	13	AT3G08943.1	AT3G08943.1	1265
NaN	NaN	NaN	16.1202	16.4153	16.1773				-1	3	3	3	9	9	9	72.781	0	32.47	470180	30	9	AT3G08947.1;AT3G08947.2	AT3G08947.1;AT3G08947.2	1266
16.5502	16.733	17.0616	17.7554	17.5908	17.6498				-1	10	10	10	35	35	35	34.133	0	86.524	2431800	9	30	AT3G09200.1;AT3G11250.1;AT3G09200.2;AT2G40010.1	AT3G09200.1;AT3G11250.1;AT3G09200.2;AT2G40010.1	1267
17.6526	18.0861	17.7607	16.9446	17.1059	17.2783				-1	4	4	4	19.2	19.2	19.2	37.491	0	65.948	1621200	19	19	AT3G09210.1	AT3G09210.1	1268
16.7079	16.7168	16.9894	17.0486	17.1399	17.2358				-1	16	16	15	49.6	49.6	47.9	59.72	0	222.67	4827700	23	81	AT3G09260.1;AT1G66270.2;AT1G66270.1;AT1G52400.2;AT3G21370.1;AT1G52400.3;AT1G52400.1;AT5G28510.1	AT3G09260.1	1269
NaN	NaN	NaN	NaN	NaN	NaN				-1	1	1	1	4.4	4.4	4.4	40.395	0.00040833	8.14	58483	20	3	AT3G09350.1	AT3G09350.1	1270
19.4032	19.4457	19.3694	20.8782	20.8364	20.8859				-1	40	21	18	68.7	42.8	33	71.147	0	323.31	23338000	37	85	AT3G09440.4;AT3G09440.3;AT3G09440.2;AT3G09440.1	AT3G09440.4;AT3G09440.3;AT3G09440.2;AT3G09440.1	1271
NaN	18.5736	NaN	18.2365	18.5358	NaN				-1	3	3	2	23.6	23.6	16.3	14.285	0	18.152	2551300	6	10	AT3G09500.1;AT3G55170.4;AT3G55170.3;AT3G55170.5;AT3G55170.2;AT3G55170.1;AT2G39390.1	AT3G09500.1	1272
19.0457	19.0942	19.0555	18.4315	18.3743	17.9214				-1	16	5	5	43.6	14	14	44.702	0	194.86	8587900	19	33	AT3G09630.1;AT3G09630.2	AT3G09630.1;AT3G09630.2	1273
16.8886	17.6865	17.809	17.5693	17.5308	17.5589				-1	7	7	7	36.5	36.5	36.5	29.983	0	104.53	2335800	15	29	AT3G09740.1	AT3G09740.1	1274
17.4824	17.6211	17.6907	18.2295	18.1437	18.0863				-1	11	11	7	52	52	33.1	37.836	0	308.8	4956800	17	65	AT3G09820.1;AT3G09820.2	AT3G09820.1;AT3G09820.2	1275
17.1752	17.1856	17.3005	17.7631	17.8506	17.9089				-1	18	18	18	38.4	38.4	38.4	89.392	0	204.7	5702600	43	87	AT3G09840.1;AT5G03340.1;AT3G53230.1	AT3G09840.1;AT5G03340.1;AT3G53230.1	1276
NaN	NaN	NaN	NaN	NaN	NaN				-1	1	1	1	4.8	4.8	4.8	47.593	0.00039078	7.329	89716	25	2	AT3G09940.2;AT3G09940.1	AT3G09940.2;AT3G09940.1	1277
18.1529	18.0911	17.993	NaN	NaN	NaN				-1	5	5	5	37.6	37.6	37.6	20.588	0	62.332	1276600	9	18	AT3G09980.1	AT3G09980.1	1278
17.0188	17.0589	17.0604	16.8344	16.7771	16.7969				-1	8	8	8	26.2	26.2	26.2	64.634	0	83.57	1622800	33	33	AT3G10050.1	AT3G10050.1	1279
16.449	16.4919	16.6573	16.5733	16.5848	16.8215				-1	5	5	5	50	50	50	7.3705	0	91.281	1860500	2	25	AT5G03850.1;AT3G10090.1	AT5G03850.1;AT3G10090.1	1280
NaN	NaN	NaN	NaN	NaN	NaN				-1	1	1	1	8.6	8.6	8.6	27.33	0.00077459	7.2593	459310	15	6	AT3G10220.1	AT3G10220.1	1281
15.1831	15.0957	15.0106	14.7995	14.6131	NaN				-1	4	4	2	10.3	10.3	7.1	81.047	0	49.965	407450	41	14	AT3G10270.1;AT3G10270.2	AT3G10270.1;AT3G10270.2	1282
18.7501	18.6088	18.602	18.3261	18.2005	18.2588				-1	18	18	18	24.7	24.7	24.7	116.6	0	285.63	5512100	62	65	AT3G10380.1;AT3G10380.2	AT3G10380.1;AT3G10380.2	1283
NaN	NaN	NaN	16.1217	15.2603	15.9075				-1	2	2	2	24.1	24.1	24.1	17.871	0	18.162	381520	9	9	AT3G10520.1	AT3G10520.1	1284
NaN	NaN	NaN	NaN	NaN	NaN				-1	1	1	1	18.2	18.2	18.2	18.823	0	15.782	100370	4	4	AT3G10640.2;AT5G04850.1;AT3G10640.1;AT5G04850.2	AT3G10640.2;AT5G04850.1;AT3G10640.1;AT5G04850.2	1285
15.3704	NaN	16.2514	NaN	NaN	15.2126				-1	3	3	3	15.4	15.4	15.4	36.931	0	21.374	340960	18	9	AT3G10670.1	AT3G10670.1	1286
14.2195	14.3854	14.3423	14.2688	NaN	14.3124				-1	4	4	4	7.5	7.5	7.5	104.54	0	40.478	266520	45	14	AT3G10690.1	AT3G10690.1	1287
14.681	14.3527	NaN	14.3624	14.3977	14.5195				-1	3	3	3	13	13	13	49.94	0	30.394	236400	23	14	AT3G10730.1	AT3G10730.1	1288
NaN	NaN	NaN	NaN	NaN	NaN				-1	2	2	2	17.4	17.4	17.4	28.791	0	18.759	83418	13	3	AT3G10850.1	AT3G10850.1	1289
15.0454	14.9455	15.3059	16.0386	16.0415	16.0167				-1	22	5	5	21.7	6.1	6.1	193.24	0	45.811	693010	88	18	AT3G11130.1	AT3G11130.1	1290
16.6691	16.5826	16.7594	NaN	NaN	NaN				-1	6	2	2	39	14.2	14.2	35.085	0	84.097	668140	16	11	AT3G11270.1;AT3G11270.2	AT3G11270.1;AT3G11270.2	1291
15.6878	15.8268	14.9484	15.3619	15.2011	15.1378				-1	5	5	5	15	15	15	55.502	0	46.431	580690	22	20	AT3G11330.1	AT3G11330.1	1292
15.8664	15.8693	15.8947	16.4383	16.4491	16.5234				-1	3	3	3	23.1	23.1	23.1	32.714	0	91.032	1608900	19	23	AT3G11400.1;AT3G11400.2;AT5G06000.1	AT3G11400.1;AT3G11400.2	1293
NaN	NaN	NaN	NaN	NaN	NaN				-1	1	1	1	3.9	3.9	3.9	73.989	0.007975	5.9409	235880	33	3	AT3G11450.1	AT3G11450.1	1294
18.4744	18.352	18.3643	18.0132	17.9855	17.7899				-1	8	8	4	70.7	70.7	37.3	16.273	0	206	7673200	6	75	AT3G11510.1;AT2G36160.1	AT3G11510.1;AT2G36160.1	1295
NaN	NaN	NaN	NaN	NaN	NaN				-1	1	1	1	3	3	3	52.36	0.0004344	10.495	301830	21	5	AT3G11590.2;AT3G11590.1	AT3G11590.2;AT3G11590.1	1296
NaN	16.2696	16.4724	NaN	NaN	NaN				-1	2	2	2	13.9	13.9	13.9	29.092	0	29.256	561210	15	9	AT3G11630.1;AT5G06290.2;AT5G06290.1	AT3G11630.1;AT5G06290.2;AT5G06290.1	1297
14.0138	NaN	NaN	15.438	14.8536	15.1444				-1	5	5	5	15.2	15.2	15.2	70.887	0	40.105	353100	33	13	AT3G11710.1	AT3G11710.1	1298
16.2808	NaN	NaN	15.3551	NaN	NaN				-1	2	2	2	13.3	13.3	13.3	34.658	0	117.26	438900	15	8	AT3G11820.2;AT3G11820.1	AT3G11820.2;AT3G11820.1	1299
15.923	15.776	15.8407	16.4624	16.3899	16.2521				-1	6	6	6	18.9	18.9	18.9	59.515	0	139.62	1220500	33	26	AT3G11830.2;AT3G11830.1	AT3G11830.2;AT3G11830.1	1300
13.7686	15.1987	14.0553	17.5587	17.469	17.5204				-1	18	18	9	26.7	26.7	12.7	130.52	0	187.98	2971800	65	51	AT3G11910.4;AT3G11910.2;AT3G11910.3;AT3G11910.1	AT3G11910.4;AT3G11910.2;AT3G11910.3;AT3G11910.1	1301
21.6608	21.5098	21.7626	21.6236	21.6331	21.5384				-1	9	9	2	62.8	62.8	20.3	22.921	0	300.19	25918000	11	33	AT3G11940.2;AT3G11940.1	AT3G11940.2;AT3G11940.1	1302
15.9528	15.7823	16.0267	16.4968	16.5754	16.587				-1	8	8	8	35.6	35.6	35.6	40.184	0	142.34	1653200	17	31	AT3G12050.1;AT3G12050.2	AT3G12050.1;AT3G12050.2	1303
NaN	NaN	NaN	NaN	NaN	NaN				-1	1	1	1	4.6	4.6	4.6	64.489	0.00041824	8.7665	187910	23	6	AT3G12080.2;AT3G12080.1	AT3G12080.2;AT3G12080.1	1304
NaN	NaN	NaN	NaN	NaN	NaN				-1	2	2	2	17.6	17.6	17.6	18.149	0	15.931	77054	10	4	AT3G12130.2;AT3G12130.1	AT3G12130.2;AT3G12130.1	1305
NaN	NaN	NaN	NaN	NaN	NaN				-1	1	1	1	4.6	4.6	4.6	35.808	0	31.143	101510	18	6	AT3G12145.1	AT3G12145.1	1306
NaN	NaN	NaN	NaN	NaN	NaN				-1	1	1	1	15.8	15.8	15.8	15.082	0.0053079	6.1186	127520	9	3	AT3G12260.1	AT3G12260.1	1307
NaN	NaN	NaN	15.9848	15.7526	15.3456				-1	4	4	4	10.1	10.1	10.1	67.343	0	33.258	504090	27	13	AT3G12270.1	AT3G12270.1	1308
16.7403	16.7142	16.838	17.4912	17.5065	17.5582				-1	6	6	6	37.8	37.8	37.8	31.589	0	165.01	3107500	20	33	AT3G12290.1	AT3G12290.1	1309
NaN	NaN	NaN	NaN	NaN	NaN				-1	1	1	1	4.8	4.8	4.8	41.879	0.00039667	7.6068	272450	17	6	AT3G12340.3;AT3G12340.2;AT3G12340.1	AT3G12340.3;AT3G12340.2;AT3G12340.1	1310
NaN	NaN	NaN	NaN	NaN	NaN				-1	2	2	1	7.1	7.1	4.7	64.135	0	14.089	205740	25	6	AT3G12360.1;AT3G12360.2	AT3G12360.1;AT3G12360.2	1311
15.9901	16.1806	NaN	16.5152	16.469	16.3385				-1	6	6	3	39.9	39.9	25.6	21.982	0	55.465	1132000	10	24	AT3G12390.1	AT3G12390.1	1312
NaN	NaN	NaN	NaN	NaN	NaN				-1	2	2	2	10.1	10.1	10.1	44.48	0	14.691	45208	18	3	AT3G12400.3;AT3G12400.1;AT3G12400.2	AT3G12400.3;AT3G12400.1;AT3G12400.2	1313
17.5631	17.7678	17.6276	17.6244	17.7254	17.8571				-1	3	3	3	31.6	31.6	31.6	17.482	0	25.365	2488000	9	21	AT3G12490.1;AT3G12490.2	AT3G12490.1;AT3G12490.2	1314
14.1366	NaN	NaN	16.8556	16.6071	16.8498				-1	33	10	9	53.7	22	22	71.101	0	102.88	1822000	37	33	AT3G12580.1	AT3G12580.1	1315
NaN	NaN	NaN	NaN	NaN	NaN				-1	2	2	2	5.7	5.7	5.7	69.58	0	37.261	516700	33	7	AT3G12640.4;AT3G12640.1;AT3G12640.3;AT3G12640.2	AT3G12640.4;AT3G12640.1;AT3G12640.3;AT3G12640.2	1316
NaN	NaN	14.8973	15.8436	15.9107	15.794				-1	6	6	6	16.2	16.2	16.2	64.303	0	79.165	758910	29	19	AT3G12670.1	AT3G12670.1	1317
NaN	NaN	NaN	15.1224	15.2033	15.254				-1	3	3	2	12.5	12.5	7.5	50.111	0	31.899	245580	33	9	AT3G12780.1	AT3G12780.1	1318
NaN	NaN	NaN	NaN	NaN	NaN				-1	1	1	1	3.7	3.7	3.7	31.796	0.00039494	7.5132	200840	15	5	AT3G12800.1	AT3G12800.1	1319
15.1079	15.5657	15.485	15.4733	15.3193	15.4585				-1	3	3	3	28.2	28.2	28.2	26.378	0	49.919	703100	13	21	AT3G12930.1	AT3G12930.1	1320
NaN	NaN	NaN	NaN	NaN	NaN				-1	1	1	1	9.7	9.7	9.7	42.72	0.00042176	9.1097	73136	21	3	AT3G13110.1	AT3G13110.1	1321
NaN	NaN	NaN	NaN	NaN	NaN				-1	5	5	5	24.3	24.3	24.3	27.032	0	44.468	311970	12	10	AT3G13200.1	AT3G13200.1	1322
15.2625	15.6348	15.2822	NaN	NaN	NaN				-1	3	3	3	19.5	19.5	19.5	24.009	0	37.573	392210	11	11	AT3G13230.2;AT3G13230.1	AT3G13230.2;AT3G13230.1	1323
NaN	NaN	NaN	NaN	NaN	NaN				-1	1	1	1	1.3	1.3	1.3	133.68	0.0039427	6.256	18647	66	1	AT3G13300.3;AT3G13300.2;AT3G13300.1	AT3G13300.3;AT3G13300.2;AT3G13300.1	1324
NaN	NaN	15.9187	15.7235	NaN	15.8623				-1	22	2	2	47.8	8.2	8.2	63.341	0	23.603	383240	34	10	AT3G13470.1	AT3G13470.1	1325
NaN	NaN	NaN	NaN	NaN	NaN				-1	3	3	3	16.8	16.8	16.8	30.226	0	38.637	587290	14	6	AT3G13570.1	AT3G13570.1	1326
NaN	NaN	NaN	NaN	NaN	NaN				-1	1	1	1	5.5	5.5	5.5	40.671	0.0011499	7.1295	14395	19	1	AT3G13610.1	AT3G13610.1	1328
NaN	NaN	NaN	NaN	NaN	NaN				-1	2	2	2	2.8	2.8	2.8	78.639	0	13.462	211310	39	7	AT3G13670.1	AT3G13670.1	1329
16.0061	15.6776	15.912	15.5026	15.362	15.4721				-1	7	7	7	18.4	18.4	18.4	60.466	0	80.549	910710	35	25	AT3G13860.1	AT3G13860.1	1330
17.1156	17.0965	17.1686	17.2127	17.2339	17.2996				-1	4	4	4	8	8	8	82.253	0	56.116	1379300	41	19	AT3G13870.2;AT3G13870.1;AT1G72960.2;AT1G72960.1	AT3G13870.2;AT3G13870.1;AT1G72960.2;AT1G72960.1	1331
18.541	18.5283	18.4626	18.7302	18.7949	18.6781				-1	20	20	0	57.8	57.8	0	46.704	0	323.31	15628000	23	113	AT3G13920.1;AT3G13920.2;AT3G13920.5;AT3G13920.3;AT1G72730.1	AT3G13920.1;AT3G13920.2;AT3G13920.5;AT3G13920.3	1332
NaN	NaN	NaN	NaN	NaN	NaN				-1	20	1	0	57.2	2.7	0	46.136	0.0011433	7.0533	319660	22	3	AT3G13920.4	AT3G13920.4	1333
22.636	22.4071	22.3678	21.8257	21.6961	22.0276				-1	45	45	40	64	64	58.8	58.467	0	323.31	134310000	32	315	AT3G13930.1	AT3G13930.1	1334
NaN	NaN	NaN	NaN	NaN	NaN				-1	5	1	1	40.5	8.4	8.4	25.977	0	10.654	188610	14	6	AT3G14290.1	AT3G14290.1	1335
17.8226	18.2045	18.1813	17.8693	17.77	17.8392				-1	8	8	7	20.9	20.9	17.6	64.255	0	248.79	4338000	30	41	AT3G14310.1	AT3G14310.1	1336
17.0007	16.8263	16.7153	17.247	17.2282	17.2109				-1	3	3	3	8.5	8.5	8.5	73.703	0	183.36	1436500	33	19	AT3G14350.2;AT3G14350.1;AT3G14350.3	AT3G14350.2;AT3G14350.1;AT3G14350.3	1337
16.2384	15.9432	16.145	16.1736	16.2264	16.1609				-1	6	1	1	25.3	4.9	4.9	40.306	0	13.028	807600	23	15	AT3G14415.3;AT3G14415.1;AT3G14415.2;AT4G18360.3;AT4G18360.2;AT4G18360.4;AT4G18360.1	AT3G14415.3;AT3G14415.1;AT3G14415.2	1338
NaN	16.3066	16.1173	16.3313	15.9661	16.5383				-1	8	8	3	35.6	35.6	14.1	38.166	0	66.129	834660	21	22	AT3G14420.4;AT3G14420.2;AT3G14420.1;AT3G14420.5;AT3G14420.6;AT3G14420.3	AT3G14420.4;AT3G14420.2;AT3G14420.1;AT3G14420.5;AT3G14420.6;AT3G14420.3	1339
19.5877	19.5253	18.8737	19.6745	19.954	19.8429				-1	9	9	4	50.6	50.6	19.7	21.309	0	94.415	7123300	8	33	AT3G14600.1	AT3G14600.1	1340
NaN	NaN	NaN	NaN	NaN	NaN				-1	3	3	3	10.5	10.5	10.5	58.506	0	20.776	140750	25	4	AT3G14680.1;AT3G14660.2;AT3G14690.1;AT3G14660.1;AT3G14650.1;AT3G14640.1;AT3G14640.2;AT3G14690.2	AT3G14680.1	1341
NaN	NaN	NaN	NaN	NaN	NaN				-1	10	2	2	24.4	6.5	6.5	74.913	0	14.73	197440	37	7	AT3G14790.1;AT3G14790.2	AT3G14790.1;AT3G14790.2	1342
19.2652	19.1415	19.0752	18.3698	18.3134	18.2947				-1	17	17	14	19.2	19.2	16.3	112.28	0	317.95	8339800	52	86	AT3G14840.2;AT1G53420.1	AT3G14840.2	1343
NaN	NaN	NaN	NaN	NaN	NaN				-1	1	1	1	3.6	3.6	3.6	71.22	0.0066434	6.0042	16598	31	1	AT3G14900.1	AT3G14900.1	1344
NaN	15.3596	15.6988	15.4025	NaN	15.9233				-1	1	1	1	7.9	7.9	7.9	38.268	0	41.282	495170	16	10	AT3G14930.3;AT3G14930.2;AT3G14930.1	AT3G14930.3;AT3G14930.2;AT3G14930.1	1345
NaN	NaN	NaN	NaN	NaN	NaN				-1	12	3	3	19.4	6.3	6.3	110.16	0	29.273	401680	61	8	AT3G14940.2;AT3G14940.1	AT3G14940.2;AT3G14940.1	1346
16.9996	16.9074	17.09	17.4186	17.0272	16.7743				-1	9	9	9	33.2	33.2	33.2	41.857	0	162.98	2130400	15	35	AT3G14990.1;AT3G14990.3;AT3G14990.2	AT3G14990.1;AT3G14990.3;AT3G14990.2	1347
16.2638	16.2495	16.3544	15.4168	NaN	NaN				-1	2	2	2	11.3	11.3	11.3	31.126	0	19.317	660030	13	11	AT3G15080.1	AT3G15080.1	1348
NaN	NaN	NaN	NaN	NaN	NaN				-1	1	1	1	5.6	5.6	5.6	57.597	0	12.429	91569	26	4	AT3G15160.2;AT3G15160.1	AT3G15160.2;AT3G15160.1	1349
NaN	NaN	NaN	NaN	NaN	NaN				-1	1	1	1	3.5	3.5	3.5	56.692	0.00041754	8.7488	25007	21	1	AT3G15180.1;AT3G15180.2	AT3G15180.1;AT3G15180.2	1350
NaN	15.6766	15.3671	14.9517	NaN	14.7793				-1	1	1	1	7.4	7.4	7.4	21.826	0	13.599	369190	7	11	AT3G15190.1	AT3G15190.1	1351
NaN	NaN	NaN	NaN	NaN	NaN				-1	1	1	1	2.3	2.3	2.3	76.317	0.00042918	10.041	14568	39	2	AT3G15220.1	AT3G15220.1	1352
16.9815	17.4657	17.2779	16.2814	16.285	15.8026				-1	4	4	4	21.4	21.4	21.4	29.749	0	114.24	1751000	14	27	AT3G15356.1	AT3G15356.1	1353
NaN	NaN	NaN	NaN	NaN	NaN				-1	2	2	2	6.4	6.4	6.4	69.393	0	11.906	107180	29	6	AT3G15590.2;AT3G15590.1	AT3G15590.2;AT3G15590.1	1354
15.8316	15.9187	NaN	16.1929	16.2118	16.3664				-1	4	4	1	18.2	18.2	5.3	37.355	0	107.31	684500	23	16	AT3G15610.1	AT3G15610.1	1355
15.954	NaN	15.9004	NaN	NaN	NaN				-1	5	5	5	35.1	35.1	35.1	24.186	0	57.434	423940	18	10	AT3G15670.1	AT3G15670.1	1356
23.5316	23.4919	NaN	23.0907	23.1255	21.563				-1	1	1	1	3.9	3.9	3.9	19.846	0.00041	8.2602	53047000	11	21	AT3G15710.1	AT3G15710.1	1357
22.2386	22.1378	22.2596	22.3485	22.3206	22.4006				-1	73	73	60	89.3	89.3	79.3	91.847	0	323.31	527890000	44	962	AT3G15730.1	AT3G15730.1	1358
NaN	NaN	NaN	NaN	NaN	NaN				-1	1	1	1	2.5	2.5	2.5	85.63	0.0011249	6.8757	75299	42	3	AT3G15920.1	AT3G15920.1	1359
17.5782	17.4699	17.5423	17.2295	17.1572	17.3541				-1	26	26	26	44.7	44.7	44.7	85.015	0	323.31	7799100	51	123	AT3G15950.1;AT3G15950.2;AT3G15950.5;AT3G15950.4;AT3G15950.3	AT3G15950.1;AT3G15950.2;AT3G15950.5;AT3G15950.4;AT3G15950.3	1360
NaN	NaN	NaN	15.1577	15.0944	NaN				-1	8	8	2	14.6	14.6	4	102.48	0	77.145	426920	45	15	AT3G15980.1;AT3G15980.7;AT3G15980.6;AT3G15980.4;AT3G15980.3;AT3G15980.2;AT3G15980.5	AT3G15980.1;AT3G15980.7;AT3G15980.6;AT3G15980.4;AT3G15980.3;AT3G15980.2;AT3G15980.5	1361
14.7658	15.0122	14.8562	14.8882	15.0553	15.1476				-1	9	9	9	35.3	35.3	35.3	51.669	0	109.9	713820	28	27	AT3G16400.2;AT3G16400.1;AT3G16410.1;AT3G16390.2;AT3G16390.1	AT3G16400.2;AT3G16400.1;AT3G16410.1	1362
17.9393	17.6807	17.9668	18.2774	18.2641	18.4025				-1	14	14	13	76.8	76.8	73.5	32.158	0	230.38	5796200	13	67	AT3G16420.3;AT3G16420.2;AT3G16420.1;AT3G16430.2;AT3G16430.1	AT3G16420.3;AT3G16420.2;AT3G16420.1	1363
NaN	NaN	NaN	NaN	NaN	NaN				-1	4	4	4	9.2	9.2	9.2	72.473	0	25.955	290820	29	9	AT3G16460.2;AT3G16460.1	AT3G16460.2;AT3G16460.1	1364
NaN	NaN	NaN	NaN	NaN	NaN				-1	1	1	1	5.8	5.8	5.8	51.204	0	12.674	311370	18	6	AT3G16520.3	AT3G16520.3	1365
19.2048	19.1692	18.9894	20.7464	20.8397	20.9618				-1	9	9	9	81	81	81	18.91	0	221.1	19009000	9	70	AT3G16640.1	AT3G16640.1	1366
NaN	16.7629	NaN	16.347	NaN	NaN				-1	6	5	5	29.7	25.8	25.8	24.329	0	39.642	549230	6	10	AT3G16780.1	AT3G16780.1	1367
18.9719	18.7768	18.8248	18.7856	18.5762	18.9625				-1	5	5	5	44.2	44.2	44.2	17.775	0	115.43	5185600	8	31	AT3G17020.1;AT3G17020.2	AT3G17020.1;AT3G17020.2	1368
18.5534	18.4745	18.4668	18.5842	18.5409	18.6191				-1	20	11	11	65.9	49.6	49.6	42.795	0	323.31	8362200	20	58	AT3G17390.1	AT3G17390.1	1369
NaN	NaN	NaN	NaN	NaN	NaN				-1	3	2	2	11.8	9.6	9.6	39.562	0	13.289	48832	25	2	AT3G17410.2;AT3G17410.1;AT2G47060.6;AT2G47060.3;AT3G62220.2;AT2G47060.5;AT3G62220.3;AT3G62220.1;AT2G47060.2;AT2G47060.1;AT2G47060.4	AT3G17410.2;AT3G17410.1;AT2G47060.6;AT2G47060.3;AT3G62220.2;AT2G47060.5;AT3G62220.3;AT3G62220.1;AT2G47060.2;AT2G47060.1;AT2G47060.4	1370
16.9116	16.6942	16.3715	17.2421	17.2092	17.2628				-1	8	8	5	42.1	42.1	32.4	24.537	0	110.6	2276900	10	27	AT3G17440.2;AT3G17440.1	AT3G17440.2;AT3G17440.1	1371
NaN	NaN	NaN	NaN	NaN	NaN				-1	1	1	1	1.2	1.2	1.2	127.24	0.0003951	7.5166	44543	55	2	AT3G17750.1	AT3G17750.1	1372
NaN	NaN	NaN	NaN	NaN	NaN				-1	2	2	2	13.6	13.6	13.6	46.846	0	28.674	332030	26	7	AT3G17810.1	AT3G17810.1	1373
NaN	NaN	NaN	NaN	NaN	NaN				-1	3	2	2	19.2	15.3	15.3	38.594	0	12.968	135240	15	5	AT3G17820.1	AT3G17820.1	1374
17.4419	17.4651	17.4506	16.9339	16.9648	16.9306				-1	6	6	6	14.5	14.5	14.5	70.405	0	109.95	2263300	36	37	AT3G17840.1	AT3G17840.1	1375
NaN	NaN	NaN	15.2519	15.1715	15.1582				-1	4	4	4	5.3	5.3	5.3	143.79	0	30.742	302010	70	10	AT3G17850.1	AT3G17850.1	1376
18.3605	18.3744	18.4091	18.4327	18.4162	18.3451				-1	17	17	17	34.8	34.8	34.8	91.58	0	323.31	12856000	44	82	AT3G17900.2;AT3G17900.1	AT3G17900.2;AT3G17900.1	1377
NaN	NaN	NaN	NaN	NaN	NaN				-1	1	1	1	5.6	5.6	5.6	37.196	0.0059944	6.0868	87921	18	3	AT3G17940.1	AT3G17940.1	1378
NaN	NaN	NaN	NaN	NaN	NaN				-1	2	2	2	3.6	3.6	3.6	64.025	0	11.276	29798	29	2	AT3G17970.1;AT3G17970.2	AT3G17970.1;AT3G17970.2	1379
19.5156	19.3681	19.4713	20.5669	20.6331	20.6124				-1	29	29	22	65.4	65.4	50.7	56.102	0	323.31	46269000	34	174	AT3G18000.1	AT3G18000.1	1380
NaN	NaN	NaN	15.6178	15.6855	15.6254				-1	12	12	12	30.7	30.7	30.7	66.041	0	103.15	1113600	34	33	AT3G18060.1;AT2G01330.1	AT3G18060.1	1381
16.3492	16.3429	16.4836	16.2431	16.3788	16.346				-1	8	2	2	35.3	19.9	19.9	35.827	0	63.196	1160600	20	17	AT3G18130.1	AT3G18130.1	1382
NaN	NaN	NaN	NaN	NaN	NaN				-1	1	1	1	7.6	7.6	7.6	25.226	0.00043384	10.477	420590	13	4	AT3G18140.2;AT3G18140.1	AT3G18140.2;AT3G18140.1	1383
NaN	NaN	14.9031	14.661	14.7544	NaN				-1	4	4	4	19	19	19	29.679	0	34.514	370380	15	15	AT3G18165.1	AT3G18165.1	1384
15.6722	15.6048	15.571	16.5602	16.2627	16.2673				-1	8	8	8	25.4	25.4	25.4	57.775	0	77.28	1472300	33	37	AT3G18190.1	AT3G18190.1	1385
NaN	NaN	NaN	NaN	NaN	NaN				-1	1	1	1	3.1	3.1	3.1	47.554	0	12.596	211450	21	6	AT4G21460.1;AT3G18240.2;AT3G18240.1;AT4G21460.2	AT4G21460.1;AT3G18240.2;AT3G18240.1;AT4G21460.2	1386
NaN	NaN	NaN	NaN	NaN	NaN				-1	2	2	2	3.2	3.2	3.2	91.131	0	13.219	167450	38	6	AT3G18370.1	AT3G18370.1	1387
NaN	NaN	NaN	NaN	NaN	NaN				-1	1	1	1	1.5	1.5	1.5	95.996	0	15.296	161050	49	4	AT3G18390.1	AT3G18390.1	1388
NaN	NaN	NaN	NaN	NaN	NaN				-1	1	1	1	6.9	6.9	6.9	20.032	0.0011411	7.0318	64000	9	3	AT3G18430.3;AT3G18430.2;AT3G18430.1	AT3G18430.3;AT3G18430.2;AT3G18430.1	1389
14.6287	NaN	NaN	15.4046	15.5341	15.3738				-1	9	9	9	19.3	19.3	19.3	79.683	0	86.554	700360	40	21	AT3G18480.1	AT3G18480.1	1390
NaN	NaN	NaN	NaN	NaN	NaN				-1	2	2	2	13.3	13.3	13.3	18.135	0	13.111	268940	3	4	AT3G18570.1	AT3G18570.1	1391
NaN	15.0491	NaN	15.1778	15.112	NaN				-1	3	3	3	10.4	10.4	10.4	63.816	0	23.009	308640	36	11	AT3G18600.1	AT3G18600.1	1392
NaN	NaN	NaN	NaN	NaN	NaN				-1	1	1	1	2.9	2.9	2.9	46.554	0.0079861	5.9538	1273500	24	3	AT3G18710.1	AT3G18710.1	1393
NaN	18.888	19.6668	19.1405	19.2703	19.2627				-1	4	4	2	42	42	32.1	12.279	0	86.861	5537500	5	19	AT3G18740.1	AT3G18740.1	1394
18.5897	18.5049	18.6518	18.3622	18.422	18.3884				-1	22	13	10	63.1	52.8	42.7	41.876	0	323.31	9290100	21	72	AT3G18780.3;AT3G18780.2;AT1G49240.1;AT3G18780.1	AT3G18780.3;AT3G18780.2;AT1G49240.1;AT3G18780.1	1395
NaN	NaN	NaN	NaN	NaN	NaN				-1	4	4	4	16.7	16.7	16.7	35.377	0	25.407	255240	14	7	AT3G18790.1	AT3G18790.1	1396
NaN	NaN	NaN	NaN	NaN	NaN				-1	1	1	1	8.6	8.6	8.6	22.87	0.002539	6.4655	32461	6	2	AT3G18800.1	AT3G18800.1	1397
NaN	15.1555	15.3395	NaN	NaN	NaN				-1	3	3	3	17	17	17	23.102	0	20.773	215050	13	8	AT3G18820.1;AT1G49300.2;AT1G49300.1;AT1G22740.1;AT3G16100.1;AT1G52280.1	AT3G18820.1;AT1G49300.2;AT1G49300.1	1398
15.3137	14.9952	15.6101	NaN	NaN	NaN				-1	3	3	3	8.5	8.5	8.5	58.102	0	25.354	228240	21	9	AT3G18830.1	AT3G18830.1	1399
NaN	NaN	NaN	15.7467	15.8914	NaN				-1	4	4	4	6.6	6.6	6.6	84.299	0	31.819	309540	41	7	AT3G18860.2;AT3G18860.1	AT3G18860.2;AT3G18860.1	1400
NaN	NaN	NaN	NaN	NaN	NaN				-1	1	1	1	5.8	5.8	5.8	31.676	0.0011304	6.9217	106810	14	3	AT3G19000.2;AT3G19000.1	AT3G19000.2;AT3G19000.1	1401
NaN	NaN	NaN	NaN	NaN	NaN				-1	1	1	1	5.1	5.1	5.1	34.383	0.0059922	6.0758	13398	16	1	AT3G19010.2;AT3G19010.3;AT3G19010.4;AT3G19010.1	AT3G19010.2;AT3G19010.3;AT3G19010.4;AT3G19010.1	1402
NaN	NaN	NaN	NaN	NaN	NaN				-1	2	2	2	13.6	13.6	13.6	48.118	0	13.865	72475	14	4	AT3G19130.1	AT3G19130.1	1403
NaN	NaN	NaN	NaN	17.0037	16.9649				-1	3	3	3	5.2	5.2	5.2	119.76	0	30.784	342090	65	5	AT3G19170.2;AT3G19170.1;AT1G49630.4;AT1G49630.5;AT1G49630.3;AT1G49630.2;AT1G49630.1	AT3G19170.2;AT3G19170.1	1404
NaN	NaN	NaN	NaN	NaN	NaN				-1	1	1	1	1.8	1.8	1.8	81.547	0.00076864	7.1614	10988	38	1	AT3G19370.3;AT3G19370.2;AT3G19370.1	AT3G19370.3;AT3G19370.2;AT3G19370.1	1405
NaN	NaN	NaN	15.3191	NaN	15.5492				-1	4	4	4	9.5	9.5	9.5	66.429	0	29.802	396580	30	11	AT3G19420.1	AT3G19420.1	1406
NaN	NaN	NaN	NaN	NaN	NaN				-1	1	1	1	4.3	4.3	4.3	35.282	0.0076682	5.9669	22846	14	1	AT3G19650.1	AT3G19650.1	1407
15.8452	15.8337	15.8078	15.6958	15.4022	15.7122				-1	7	6	6	21.8	19.4	19.4	45.844	0	158.27	659460	26	21	AT3G19760.1;AT1G51380.2;AT1G51380.4;AT1G51380.3;AT1G51380.1	AT3G19760.1	1408
15.1566	16.1784	14.8087	17.2898	17.2323	17.3346				-1	9	9	9	29.6	29.6	29.6	57.897	0	243.47	1433200	28	29	AT3G19770.1;AT3G19770.2	AT3G19770.1;AT3G19770.2	1409
17.5537	17.6132	17.6175	16.8864	17.1181	16.7903				-1	12	12	12	30.7	30.7	30.7	65.393	0	152.3	3293900	30	44	AT3G19820.3;AT3G19820.2;AT3G19820.1	AT3G19820.3;AT3G19820.2;AT3G19820.1	1410
NaN	NaN	NaN	NaN	NaN	NaN				-1	2	2	2	2.9	2.9	2.9	122.28	0	10.695	63190	55	2	AT3G19870.1;AT3G19870.2	AT3G19870.1;AT3G19870.2	1411
NaN	NaN	NaN	NaN	NaN	NaN				-1	1	1	1	2.7	2.7	2.7	57.095	0	45.201	80147	18	3	AT3G19930.2;AT3G19930.1	AT3G19930.2;AT3G19930.1	1412
NaN	NaN	NaN	NaN	NaN	NaN				-1	1	1	1	3	3	3	35.705	0.0039455	6.2659	20713	12	1	AT3G19950.1;AT3G19950.3;AT3G19950.2	AT3G19950.1;AT3G19950.3;AT3G19950.2	1413
NaN	NaN	NaN	NaN	NaN	NaN				-1	3	3	3	4	4	4	131.13	0	21.394	2605700	64	5	AT3G19960.5;AT3G19960.4;AT3G19960.1;AT3G19960.2;AT3G19960.3	AT3G19960.5;AT3G19960.4;AT3G19960.1;AT3G19960.2	1414
NaN	NaN	NaN	14.6423	14.475	NaN				-1	3	3	3	12.3	12.3	12.3	34.25	0	18.43	218350	14	9	AT3G20000.1	AT3G20000.1	1415
NaN	NaN	NaN	NaN	NaN	NaN				-1	5	5	5	14.1	14.1	14.1	59.229	0	77.919	669200	31	9	AT3G20050.1	AT3G20050.1	1416
16.3733	17.1755	16.4429	16.8339	16.8271	16.4659				-1	8	8	8	28.4	28.4	28.4	61.23	0	77.193	1091300	33	20	AT3G20290.3;AT3G20290.2;AT3G20290.1	AT3G20290.3;AT3G20290.2;AT3G20290.1	1417
18.3222	18.0864	18.0242	18.2403	18.2115	18.264				-1	17	13	8	48.1	39.7	21.1	60.362	0	262.74	5976700	35	55	AT3G20410.1;AT3G20410.2;AT1G61950.1	AT3G20410.1;AT3G20410.2	1418
NaN	NaN	NaN	NaN	NaN	NaN				-1	5	5	5	10.5	10.5	10.5	100.1	0	33.174	280590	38	11	AT3G20440.1;AT3G20440.2;AT3G20440.3	AT3G20440.1;AT3G20440.2;AT3G20440.3	1419
17.0187	17.0023	16.7346	16.6439	16.5394	16.2969				-1	9	9	9	33.4	33.4	33.4	36.952	0	146.08	2810700	16	44	AT3G20550.1	AT3G20550.1	1420
NaN	NaN	NaN	15.6329	NaN	15.6221				-1	4	4	4	7.4	7.4	7.4	88.373	0	27.057	244220	38	8	AT3G20630.1	AT3G20630.1	1421
NaN	NaN	NaN	NaN	NaN	NaN				-1	1	1	1	3.9	3.9	3.9	36.947	0	12.34	105630	16	3	AT3G20810.5;AT3G20810.4;AT3G20810.3;AT3G20810.1;AT3G20810.2	AT3G20810.5;AT3G20810.4;AT3G20810.3;AT3G20810.1;AT3G20810.2	1422
15.7148	15.6604	15.9893	15.6705	15.901	15.9376				-1	2	2	2	12.6	12.6	12.6	39.862	0	36.427	862600	20	17	AT3G20820.1	AT3G20820.1	1423
15.0961	15.3124	14.9997	NaN	NaN	14.9074				-1	4	4	4	12.6	12.6	12.6	58.244	0	52.629	342560	26	12	AT3G21070.2;AT3G21070.3;AT3G21070.4;AT3G21070.1	AT3G21070.2;AT3G21070.3;AT3G21070.4;AT3G21070.1	1424
NaN	NaN	NaN	NaN	NaN	NaN				-1	3	1	1	5.5	2.9	2.9	77.237	0.002566	6.5977	24402	32	1	AT3G21090.1	AT3G21090.1	1425
NaN	NaN	NaN	NaN	NaN	NaN				-1	1	1	1	1	1	1	118.77	0.001145	7.0758	749210	50	2	AT3G21180.1	AT3G21180.1	1426
NaN	NaN	NaN	NaN	NaN	NaN				-1	1	1	1	4.7	4.7	4.7	35.463	0.00042662	9.8515	39306	17	1	AT3G21200.1	AT3G21200.1	1427
16.7036	16.6327	16.5288	NaN	NaN	NaN				-1	4	4	3	23.3	23.3	16.6	40.454	0	43.279	391960	24	11	AT3G21600.1;AT3G21600.2;AT3G21600.3	AT3G21600.1;AT3G21600.2;AT3G21600.3	1428
NaN	NaN	NaN	NaN	NaN	NaN				-1	1	1	1	6	6	6	41.805	0.00077519	7.2667	220730	15	3	AT3G21640.1	AT3G21640.1	1429
16.9034	16.8692	16.9021	15.8304	16.3299	16.3414				-1	11	11	11	24.8	24.8	24.8	64.244	0	129.36	2337900	28	38	AT3G21720.1	AT3G21720.1	1430
NaN	NaN	NaN	15.5988	NaN	15.5822				-1	3	3	3	22.3	22.3	22.3	31.398	0	21.079	221330	16	6	AT3G21865.1	AT3G21865.1	1431
18.024	18.357	18.2738	17.9593	18.0222	17.9146				-1	10	10	10	66.8	66.8	66.8	27.475	0	180.72	4763400	15	62	AT3G22110.1;AT4G15165.1	AT3G22110.1	1432
NaN	NaN	NaN	NaN	NaN	NaN				-1	2	1	1	15.6	7.4	7.4	15.614	0.0049716	6.1572	21122	6	1	AT3G22230.1	AT3G22230.1	1433
15.8596	16.1581	16.0206	14.7604	NaN	14.9597				-1	5	5	5	28.3	28.3	28.3	27.734	0	88.253	560260	12	17	AT3G22260.1;AT3G22260.6;AT3G22260.5;AT3G22260.4;AT3G22260.3;AT3G22260.2	AT3G22260.1;AT3G22260.6;AT3G22260.5;AT3G22260.4;AT3G22260.3;AT3G22260.2	1434
NaN	NaN	NaN	NaN	NaN	NaN				-1	1	1	1	1.5	1.5	1.5	85.645	0.00040667	8.0677	20822	38	1	AT3G22270.1	AT3G22270.1	1435
NaN	NaN	NaN	NaN	NaN	NaN				-1	2	2	2	6.6	6.6	6.6	62.321	0	12.494	65699	28	4	AT3G22310.2;AT3G22310.1	AT3G22310.2;AT3G22310.1	1436
NaN	NaN	NaN	NaN	NaN	NaN				-1	2	2	2	8.3	8.3	8.3	65.359	0	26.814	241070	38	7	AT3G22330.1	AT3G22330.1	1437
NaN	NaN	NaN	NaN	NaN	NaN				-1	2	2	2	15.9	15.9	15.9	29.225	0	31.985	39658	13	3	AT3G22425.2;AT4G14910.1;AT4G14910.3;AT4G14910.2	AT3G22425.2;AT4G14910.1;AT4G14910.3;AT4G14910.2	1438
17.6949	17.8632	17.8799	15.8822	NaN	NaN				-1	5	5	5	20.8	20.8	20.8	55.062	0	169.4	1748600	25	17	AT3G22640.1	AT3G22640.1	1439
16.096	NaN	15.9516	NaN	NaN	NaN				-1	3	3	2	11.1	11.1	8.7	42.714	0	21.906	443960	23	9	AT3G22750.1	AT3G22750.1	1440
17.2639	17.2827	17.212	NaN	17.2234	17.2923				-1	4	4	4	22.6	22.6	22.6	27.107	0	63.856	1404200	13	18	AT3G22850.1	AT3G22850.1	1441
18.4559	18.4394	18.5226	18.351	18.3797	18.5777				-1	9	9	8	38.2	38.2	35	51.458	0	134.97	6126700	27	59	AT3G22890.1;AT4G14680.1;AT4G14680.2	AT3G22890.1	1442
14.9776	15.0044	15.0331	NaN	14.1603	NaN				-1	1	1	1	9.8	9.8	9.8	20.548	0	18.618	254520	10	10	AT3G22950.2;AT3G22950.1	AT3G22950.2;AT3G22950.1	1443
NaN	NaN	NaN	NaN	NaN	NaN				-1	3	3	3	11.2	11.2	11.2	65.13	0	26.619	471220	28	8	AT3G22960.1	AT3G22960.1	1444
NaN	NaN	NaN	16.2528	15.9657	NaN				-1	3	3	1	6.2	6.2	2.6	69.355	0	32.299	320400	36	8	AT3G23300.2;AT3G23300.1;AT4G14360.2;AT4G14360.1	AT3G23300.2;AT3G23300.1;AT4G14360.2;AT4G14360.1	1445
NaN	NaN	NaN	NaN	NaN	NaN				-1	5	2	2	14.6	4.8	4.8	65.322	0	21.738	161880	26	7	AT3G23310.1;AT1G03920.2;AT1G30640.3;AT1G30640.2;AT1G30640.1;AT1G03920.3;AT1G03920.1	AT3G23310.1	1446
15.5598	15.3877	15.396	16.4146	16.317	16.15				-1	5	5	5	10.8	10.8	10.8	98.061	0	85.953	963140	46	25	AT3G23530.1;AT3G23510.1	AT3G23530.1;AT3G23510.1	1447
NaN	NaN	NaN	NaN	NaN	NaN				-1	2	2	1	15.9	15.9	6.3	26.53	0.00042644	9.8346	18440	14	1	AT3G23570.3;AT3G23570.2;AT3G23570.1	AT3G23570.3;AT3G23570.2;AT3G23570.1	1448
NaN	NaN	NaN	NaN	NaN	NaN				-1	3	3	3	17.4	17.4	17.4	25.563	0	19.335	125120	15	5	AT3G23600.2;AT3G23600.1	AT3G23600.2;AT3G23600.1	1449
NaN	NaN	NaN	NaN	NaN	NaN				-1	4	4	4	20.7	20.7	20.7	35.727	0	23.26	261290	17	8	AT3G23620.1	AT3G23620.1	1450
NaN	NaN	NaN	NaN	NaN	NaN				-1	6	4	3	17.3	11.4	9.2	84.046	0	25.543	93578	26	6	AT3G23660.1;AT3G23660.2	AT3G23660.1;AT3G23660.2	1451
NaN	NaN	NaN	NaN	NaN	NaN				-1	1	1	1	4.3	4.3	4.3	42.75	0.00077821	7.2959	44702	18	1	AT3G23700.1	AT3G23700.1	1452
NaN	16.3554	16.5344	16.6227	16.7009	16.5937				-1	4	4	3	6.4	6.4	4.8	99.963	0	29.478	932480	37	17	AT3G23750.1;AT2G01820.1	AT3G23750.1	1453
NaN	NaN	NaN	NaN	NaN	NaN				-1	2	2	2	7.1	7.1	7.1	50.116	0.00043141	10.228	708560	26	2	AT3G23800.2;AT3G23800.1	AT3G23800.2;AT3G23800.1	1454
16.8066	16.7207	16.789	19.1058	19.1843	19.2997				-1	27	7	7	70.9	29.7	29.7	53.159	0	235.81	7862400	23	49	AT3G23810.1	AT3G23810.1	1455
NaN	NaN	NaN	NaN	NaN	NaN				-1	4	4	4	12.4	12.4	12.4	50.569	0	25.876	149420	25	6	AT3G23820.1	AT3G23820.1	1456
NaN	NaN	NaN	NaN	NaN	NaN				-1	2	2	2	27.9	27.9	27.9	14.128	0	24.948	243320	6	6	AT3G23830.2;AT3G23830.1	AT3G23830.2;AT3G23830.1	1457
NaN	NaN	NaN	NaN	NaN	NaN				-1	2	2	2	7.1	7.1	7.1	63.762	0	20.266	26144	32	2	AT3G23920.1	AT3G23920.1	1458
NaN	NaN	NaN	16.2106	NaN	16.2973				-1	3	3	3	8	8	8	78.383	0	33.576	411720	38	7	AT3G23980.1	AT3G23980.1	1459
18.4568	18.5191	18.4871	18.1614	18.1044	18.1732				-1	25	25	19	58.1	58.1	48.4	61.28	0	323.31	11561000	35	138	AT3G23990.1	AT3G23990.1	1460
20.2326	20.0952	19.9959	15.1137	14.8326	14.8036				-1	33	33	33	36.6	36.6	36.6	105.99	0	323.31	24756000	39	130	AT3G24180.2;AT3G24180.1	AT3G24180.2;AT3G24180.1	1461
NaN	NaN	NaN	NaN	NaN	NaN				-1	2	2	2	10.4	10.4	10.4	39.119	0	14.288	120290	13	4	AT3G24350.1;AT3G24350.2	AT3G24350.1;AT3G24350.2	1462
NaN	NaN	NaN	NaN	NaN	NaN				-1	2	2	2	6.4	6.4	6.4	57.764	0	15.753	84471	29	4	AT3G24430.1	AT3G24430.1	1463
14.7938	14.9442	NaN	NaN	NaN	NaN				-1	4	4	4	14.2	14.2	14.2	54.36	0	29.619	260570	33	10	AT3G24503.1	AT3G24503.1	1464
15.2168	15.1117	NaN	14.9468	NaN	NaN				-1	5	5	5	23.3	23.3	23.3	53.674	0	38.997	390500	30	14	AT3G24530.1;AT3G24530.2;AT3G24530.3	AT3G24530.1;AT3G24530.2;AT3G24530.3	1465
16.967	17.0035	16.8308	17.7491	17.7211	17.587				-1	5	5	5	13.2	13.2	13.2	69.271	0	143.73	2929900	26	34	AT3G24550.1;AT3G24540.1	AT3G24550.1	1466
NaN	NaN	NaN	NaN	NaN	NaN				-1	2	2	2	6.7	6.7	6.7	73.352	0	11.418	108290	27	4	AT3G24660.1	AT3G24660.1	1467
NaN	18.2356	18.5662	18.3019	18.0835	18.261				-1	8	4	3	33	26.2	21.8	23.459	0	77.915	2951800	11	21	AT3G24830.1	AT3G24830.1	1468
18.0707	18.0232	17.9442	17.3591	17.8047	17.4387				-1	4	4	4	36	36	36	23.371	0	35.42	1790500	11	18	AT3G25070.1;AT3G25070.2	AT3G25070.1;AT3G25070.2	1469
15.0058	NaN	15.5391	15.0612	15.1964	15.1299				-1	4	4	4	7.8	7.8	7.8	61.452	0	38.963	426690	25	15	AT3G25230.1;AT3G25230.2	AT3G25230.1;AT3G25230.2	1470
19.0036	19.401	19.2299	19.5868	19.6892	19.6361				-1	13	13	2	49.8	49.8	4.7	34.358	0	323.31	12729000	10	73	AT3G25520.1;AT3G25520.3;AT3G25520.2	AT3G25520.1;AT3G25520.3;AT3G25520.2	1471
17.8057	NaN	17.8714	18.3777	17.9154	18.4931				-1	2	2	2	14.2	14.2	14.2	30.691	0	95.197	2158800	16	15	AT3G25530.1;AT3G25530.2;AT3G25530.3	AT3G25530.1;AT3G25530.2;AT3G25530.3	1472
NaN	NaN	NaN	NaN	NaN	NaN				-1	3	3	1	23.9	23.9	6.3	23.918	0	19.321	121580	12	4	AT3G25580.2;AT3G25580.1	AT3G25580.2;AT3G25580.1	1473
NaN	NaN	NaN	NaN	NaN	NaN				-1	1	1	1	3.7	3.7	3.7	57.181	0.0053041	6.1066	57032	25	3	AT3G25660.1	AT3G25660.1	1474
14.7964	14.6572	14.8501	18.048	18.3633	17.8713				-1	12	10	9	30	26.4	21.3	65.597	0	111.79	2989500	30	33	AT3G25800.1;AT3G25800.3;AT3G25800.2	AT3G25800.1;AT3G25800.3;AT3G25800.2	1475
NaN	NaN	NaN	14.7477	NaN	14.4045				-1	3	3	3	3.7	3.7	3.7	107.99	0	24.005	312940	42	10	AT3G25840.1;AT3G25840.2	AT3G25840.1	1476
16.1837	16.0113	16.3865	15.9091	15.8244	15.8844				-1	3	3	3	20.2	20.2	20.2	29.707	0	79.006	639550	18	16	AT3G25920.1	AT3G25920.1	1477
NaN	NaN	NaN	NaN	NaN	NaN				-1	1	1	1	2.7	2.7	2.7	58.758	0	13.662	138600	31	5	AT3G26020.6;AT3G26020.5;AT3G26020.2;AT3G26020.1;AT3G26020.8;AT3G26020.7;AT3G26020.3;AT3G26020.4	AT3G26020.6;AT3G26020.5;AT3G26020.2;AT3G26020.1;AT3G26020.8;AT3G26020.7;AT3G26020.3;AT3G26020.4	1478
NaN	NaN	NaN	NaN	NaN	NaN				-1	1	1	1	2.5	2.5	2.5	55.24	0.0025698	6.6119	293880	27	2	AT3G26030.1	AT3G26030.1	1479
16.93	17.0821	17.0892	16.3662	16.4449	16.0522				-1	4	4	4	40.9	40.9	40.9	17.028	0	83.751	1341800	9	19	AT3G26060.3;AT3G26060.1;AT3G26060.2	AT3G26060.3;AT3G26060.1;AT3G26060.2	1480
NaN	NaN	NaN	NaN	NaN	NaN				-1	2	2	2	7.3	7.3	7.3	45.991	0	14.941	79706	14	4	AT3G26090.2;AT3G26090.1	AT3G26090.2;AT3G26090.1	1481
NaN	NaN	NaN	NaN	NaN	NaN				-1	1	1	1	5	5	5	57.321	0.0086445	5.9231	607210	28	1	AT3G26310.1	AT3G26310.1	1482
NaN	NaN	NaN	NaN	NaN	NaN				-1	1	1	1	5	5	5	54.638	0.0011377	6.9966	14562	30	1	AT3G26410.1	AT3G26410.1	1483
NaN	NaN	NaN	NaN	15.0962	15.0918				-1	3	3	3	16.7	16.7	16.7	26.923	0	18.994	383300	9	9	AT3G26420.1	AT3G26420.1	1484
15.9476	15.6944	16.1754	16.7991	16.7318	17.001				-1	6	6	5	61.8	61.8	53.3	17.791	0	137.09	1439400	8	25	AT3G26450.1	AT3G26450.1	1485
15.7167	16.0482	15.91	NaN	NaN	NaN				-1	3	3	3	3.3	3.3	3.3	134.16	0	27.448	377530	65	8	AT3G26560.1	AT3G26560.1	1486
19.2096	19.1043	19.2665	19.11	19.1565	19.1056				-1	9	9	3	32.1	32.1	14.4	42.489	0	227.49	8792800	25	61	AT3G26650.1	AT3G26650.1	1487
NaN	NaN	NaN	NaN	NaN	NaN				-1	1	1	1	4.5	4.5	4.5	30.101	0	12.977	455620	7	4	AT3G26710.1	AT3G26710.1	1488
NaN	NaN	NaN	NaN	NaN	NaN				-1	1	1	1	4	4	4	44.321	0	34.34	46063	17	3	AT3G26780.1	AT3G26780.1	1489
NaN	NaN	NaN	14.8769	NaN	14.7896				-1	2	2	2	9.2	9.2	9.2	56.061	0	19.145	160240	32	5	AT3G26830.1	AT3G26830.1	1490
15.2498	15.053	NaN	NaN	NaN	NaN				-1	2	2	2	8.8	8.8	8.8	49.916	0	16.76	209320	23	7	AT3G26935.1	AT3G26935.1	1491
NaN	NaN	NaN	15.6276	15.4296	15.486				-1	4	4	4	35.2	35.2	35.2	20.611	0	56.303	359880	11	10	AT3G27050.1	AT3G27050.1	1492
14.2188	NaN	14.4702	NaN	NaN	NaN				-1	2	2	2	18.3	18.3	18.3	22.565	0	13.293	121410	15	7	AT3G27080.1	AT3G27080.1	1493
17.4476	17.8724	17.5715	17.6312	17.7385	17.4055				-1	2	2	2	17.5	17.5	17.5	20.911	0	42.069	2116400	5	14	AT3G27160.1;AT3G27160.2	AT3G27160.1;AT3G27160.2	1494
NaN	NaN	NaN	NaN	NaN	NaN				-1	2	2	2	6.2	6.2	6.2	57.845	0	11.733	50318	21	5	AT3G27180.1	AT3G27180.1	1495
NaN	NaN	NaN	NaN	NaN	NaN				-1	1	1	1	9.2	9.2	9.2	28.73	0.00078094	7.3207	25151	12	5	AT5G40810.2;AT5G40810.1;AT3G27240.1	AT5G40810.2;AT5G40810.1;AT3G27240.1	1496
17.3508	17.2018	17.3895	16.6716	16.7673	16.8071				-1	8	5	5	54.1	39.4	39.4	30.638	0	96.548	1686900	15	18	AT3G27280.2;AT3G27280.1	AT3G27280.2;AT3G27280.1	1497
NaN	NaN	NaN	15.1291	15.2006	15.2824				-1	4	4	4	14.1	14.1	14.1	59.156	0	58.89	364150	31	12	AT3G27300.3;AT3G27300.2;AT3G27300.1;AT3G27300.5;AT3G27300.4	AT3G27300.3;AT3G27300.2;AT3G27300.1;AT3G27300.5;AT3G27300.4	1498
15.0278	NaN	NaN	NaN	NaN	15.1524				-1	2	2	2	9	9	9	31.171	0	12.874	250370	14	8	AT3G27380.2;AT3G27380.1;AT5G40650.1;AT5G40650.2	AT3G27380.2;AT3G27380.1;AT5G40650.1;AT5G40650.2	1499
NaN	NaN	NaN	NaN	NaN	NaN				-1	2	2	2	6.3	6.3	6.3	65.496	0	17.338	1172700	23	9	AT3G27390.2;AT3G27390.1	AT3G27390.2;AT3G27390.1	1500
NaN	NaN	NaN	NaN	NaN	NaN				-1	2	2	2	11.6	11.6	11.6	28.811	0	11.178	136900	10	2	AT3G27430.1;AT3G27430.2;AT5G40580.2;AT5G40580.1;AT3G27430.3;AT5G40580.4;AT5G40580.3	AT3G27430.1;AT3G27430.2;AT5G40580.2;AT5G40580.1;AT3G27430.3;AT5G40580.4;AT5G40580.3	1501
NaN	NaN	NaN	15.6861	15.4278	15.5557				-1	5	5	5	8.3	8.3	8.3	101.83	0	46.297	319120	51	10	AT3G27530.1	AT3G27530.1	1502
NaN	NaN	NaN	NaN	NaN	NaN				-1	3	3	3	19.1	19.1	19.1	37.147	0	197.37	479730	17	8	AT3G27570.2;AT3G27570.1	AT3G27570.2;AT3G27570.1	1503
21.3167	21.1549	19.1986	NaN	NaN	NaN				-1	8	8	8	35.1	35.1	35.1	20.313	0	196.59	10311000	5	35	AT3G27660.2;AT3G27660.1	AT3G27660.2;AT3G27660.1	1504
NaN	NaN	NaN	NaN	NaN	NaN				-1	1	1	1	7.5	7.5	7.5	19.682	0	45.938	520280	11	6	AT3G27850.1;AT3G27830.2;AT3G27830.1	AT3G27850.1;AT3G27830.2;AT3G27830.1	1505
NaN	NaN	NaN	NaN	NaN	NaN				-1	1	1	1	6.1	6.1	6.1	21.556	0	33.524	281140	12	5	AT3G27890.1	AT3G27890.1	1506
NaN	NaN	NaN	NaN	NaN	NaN				-1	2	2	2	4.6	4.6	4.6	77.515	0	23.357	162610	34	3	AT3G28180.1	AT3G28180.1	1507
NaN	NaN	NaN	15.3895	15.3615	15.3535				-1	5	5	5	17.9	17.9	17.9	42.954	0	48.462	470850	18	16	AT3G28300.1;AT3G28290.1	AT3G28300.1;AT3G28290.1	1508
16.3319	16.599	16.7375	NaN	16.1775	NaN				-1	4	4	4	23.4	23.4	23.4	29.801	0	27.003	869040	12	14	AT3G28460.3;AT3G28460.1;AT3G28460.2	AT3G28460.3;AT3G28460.1;AT3G28460.2	1509
NaN	NaN	NaN	NaN	NaN	NaN				-1	10	1	1	49	5.7	5.7	40.791	0.0011403	7.0304	7093.7	19	1	AT3G28710.1	AT3G28710.1	1510
NaN	NaN	NaN	18.022	18.2854	17.8169				-1	10	10	0	49	49	0	40.787	0	189.63	1803200	19	31	AT3G28715.1	AT3G28715.1	1511
NaN	NaN	NaN	NaN	NaN	NaN				-1	1	1	1	2	2	2	71.645	0.0011512	7.1457	14046	28	1	AT3G28730.1	AT3G28730.1	1513
16.2344	16.3749	16.4024	15.9841	16.2301	16.0162				-1	7	7	7	12.5	12.5	12.5	136.79	0	86.84	1240400	68	25	AT3G28860.1	AT3G28860.1	1514
NaN	NaN	NaN	NaN	NaN	NaN				-1	1	1	1	5.1	5.1	5.1	33.56	0	54.516	161490	15	5	AT3G28920.1	AT3G28920.1	1515
15.3065	15.3751	15.5944	15.4032	15.4441	15.7575				-1	3	3	3	21.9	21.9	21.9	19.465	0	46.898	552040	7	16	AT3G28940.1	AT3G28940.1	1516
21.8271	21.4747	21.147	21.4427	21.5554	21.4333				-1	12	12	12	46.9	46.9	46.9	34.451	0	323.31	41207000	17	72	AT3G29075.1	AT3G29075.1	1517
NaN	NaN	NaN	NaN	NaN	NaN				-1	1	1	1	4.9	4.9	4.9	58.689	0.0053135	6.1313	48927	33	3	AT3G29160.2;AT3G29160.1	AT3G29160.2;AT3G29160.1	1518
14.6023	NaN	14.5161	14.6769	NaN	14.7916				-1	2	2	2	4.2	4.2	4.2	108.58	0	21.936	231840	49	10	AT3G29320.1	AT3G29320.1	1519
17.188	17.2542	17.3891	17.5689	17.3587	17.3731				-1	8	6	6	29.6	23.3	23.3	53.172	0	74.42	1587100	29	23	AT3G29360.2;AT3G29360.1	AT3G29360.2;AT3G29360.1	1520
NaN	NaN	NaN	NaN	NaN	NaN				-1	1	1	1	1.8	1.8	1.8	75.225	0.0056497	6.0947	77612	32	3	AT3G29400.1	AT3G29400.1	1521
NaN	NaN	NaN	NaN	NaN	NaN				-1	1	1	1	3.3	3.3	3.3	49.439	0.0011215	6.8612	34780	25	2	AT3G29590.1	AT3G29590.1	1522
NaN	NaN	NaN	18.1794	18.1764	18.0452				-1	19	19	19	28	28	28	143.98	0	299.52	7165600	60	66	AT3G33530.4;AT3G33530.1;AT3G33530.2;AT3G33530.3;AT3G33530.5	AT3G33530.4;AT3G33530.1;AT3G33530.2;AT3G33530.3;AT3G33530.5	1523
18.099	18.1414	18.0639	19.3223	19.5048	19.5279				-1	7	7	7	28.8	28.8	28.8	50.284	0	129.57	6174900	23	42	AT3G42050.1	AT3G42050.1	1524
18.6711	18.8623	18.9798	17.5097	17.569	17.5045				-1	34	26	26	49.1	42.7	42.7	93.002	0	323.31	10172000	46	117	AT3G43190.2;AT3G43190.1	AT3G43190.2;AT3G43190.1	1525
17.2536	17.0862	17.2963	17.9942	18.0964	18.01				-1	20	20	20	19.4	19.4	19.4	191.45	0	323.31	7576800	103	93	AT3G43300.2;AT3G43300.3;AT3G43300.1	AT3G43300.2;AT3G43300.3;AT3G43300.1	1526
17.6354	18.8318	17.849	17.4868	18.399	17.9443				-1	5	5	5	53.6	53.6	53.6	6.4294	0	33.996	3492300	3	22	AT4G33865.1;AT3G44010.2;AT3G44010.1;AT3G43980.1;AT4G33885.1	AT4G33865.1;AT3G44010.2;AT3G44010.1;AT3G43980.1	1527
18.1918	18.034	18.0803	18.5833	18.7219	18.5498				-1	14	14	8	56.4	56.4	42.6	46.444	0	182.33	6377100	19	64	AT3G44110.1;AT3G44110.2	AT3G44110.1;AT3G44110.2	1528
17.7167	17.5315	17.8193	18.377	18.3857	18.4442				-1	15	15	13	54	54	48.3	38.152	0	200.37	8156100	18	82	AT3G44310.3;AT3G44310.1;AT3G44310.4;AT3G44310.2;AT3G44300.1	AT3G44310.3;AT3G44310.1;AT3G44310.4;AT3G44310.2	1529
16.7911	16.3081	16.315	17.5504	17.3644	17.2796				-1	6	4	4	33.5	22.8	22.8	38.022	0	68.801	1983300	21	23	AT3G44320.1	AT3G44320.1	1530
NaN	14.4092	NaN	15.0639	15.0797	14.7766				-1	3	3	3	4.2	4.2	4.2	117.69	0	40.333	255140	39	11	AT3G44340.4;AT3G44340.3;AT3G44340.1;AT3G44340.5;AT3G44340.2;AT4G32640.2;AT4G32640.1	AT3G44340.4;AT3G44340.3;AT3G44340.1;AT3G44340.5;AT3G44340.2;AT4G32640.2;AT4G32640.1	1531
NaN	NaN	NaN	NaN	NaN	NaN				-1	1	1	1	11.8	11.8	11.8	20.405	0.0011278	6.8993	24877	11	1	AT3G44380.1	AT3G44380.1	1532
NaN	NaN	NaN	16.0898	16.2455	16.2963				-1	2	2	2	40.5	40.5	40.5	11.015	0	19.192	431480	5	9	AT3G44590.2;AT3G44590.1	AT3G44590.2;AT3G44590.1	1533
16.4198	17.5679	15.9978	NaN	NaN	NaN				-1	2	2	2	9.1	9.1	9.1	25.985	0	41.572	846460	12	11	AT3G44750.2;AT3G44750.1	AT3G44750.2;AT3G44750.1	1534
NaN	NaN	NaN	NaN	NaN	NaN				-1	2	2	2	2.8	2.8	2.8	72.964	0	16.783	73257	27	3	AT3G44820.1	AT3G44820.1	1535
15.6425	15.8897	15.6788	15.6159	15.4898	15.3552				-1	7	7	7	35	35	35	22.134	0	55.754	990780	11	23	AT3G44890.1	AT3G44890.1	1536
NaN	NaN	NaN	NaN	NaN	NaN				-1	1	1	1	7.2	7.2	7.2	33.54	0.00041964	8.9003	193720	16	4	AT3G44990.1	AT3G44990.1	1537
21.0446	21.2696	21.1269	20.4485	20.4966	20.3215				-1	12	12	3	71	71	18.5	13.878	0	262.49	31560000	6	71	AT5G62300.2;AT5G62300.1;AT3G45030.1	AT5G62300.2;AT5G62300.1;AT3G45030.1	1538
16.4628	16.5106	16.4919	15.8319	15.8064	15.9593				-1	10	10	10	20.2	20.2	20.2	102.04	0	93.691	1261000	55	27	AT3G45140.1;AT3G45140.2	AT3G45140.1;AT3G45140.2	1539
NaN	NaN	NaN	NaN	NaN	NaN				-1	2	2	2	4	4	4	83.314	0	11.19	78942	42	4	AT3G45190.2;AT3G45190.1;AT1G07990.2;AT2G28360.1;AT1G07990.1	AT3G45190.2;AT3G45190.1;AT1G07990.2;AT2G28360.1;AT1G07990.1	1540
NaN	16.0282	16.1695	NaN	NaN	NaN				-1	1	1	1	8.5	8.5	8.5	22.85	0.00042955	10.066	265150	9	6	AT3G45600.2;AT3G45600.1	AT3G45600.2;AT3G45600.1	1541
NaN	NaN	NaN	NaN	NaN	NaN				-1	2	2	2	11.6	11.6	11.6	42.716	0	21.725	84317	21	7	AT3G45640.1	AT3G45640.1	1542
NaN	NaN	NaN	NaN	NaN	NaN				-1	1	1	1	1.3	1.3	1.3	61.098	0.00040371	7.905	404100	16	12	AT3G45650.1;AT3G45650.2	AT3G45650.1;AT3G45650.2	1543
17.8856	17.7358	17.889	17.639	17.7462	17.6907				-1	25	25	25	38.1	38.1	38.1	111.69	0	323.31	8550800	54	113	AT3G45780.2;AT3G45780.1	AT3G45780.2;AT3G45780.1	1544
NaN	NaN	NaN	15.1187	14.7129	15.2129				-1	4	4	3	7.1	7.1	5.8	119.86	0	33.592	257030	66	8	AT3G45850.2;AT3G45850.1	AT3G45850.2;AT3G45850.1	1545
NaN	NaN	NaN	NaN	NaN	NaN				-1	2	2	2	8	8	8	45.343	0	11.062	179550	20	2	AT3G45900.1	AT3G45900.1	1546
17.8352	17.917	17.7871	17.6835	17.7251	17.5744				-1	3	3	2	20.1	20.1	20.1	16.112	0	61.067	1604400	6	16	AT3G46010.1;AT5G59890.1;AT3G46010.2	AT3G46010.1;AT5G59890.1	1547
18.2906	18.4881	18.2288	17.3786	17.3792	17.2833				-1	5	2	2	46.2	23.8	23.8	14.774	0	75.889	2510000	8	13	AT3G46040.1	AT3G46040.1	1548
NaN	15.2928	NaN	14.8484	14.9698	NaN				-1	3	3	1	21.8	21.8	6.5	23.835	0	27.652	204590	16	9	AT3G46060.3;AT3G46060.2;AT3G46060.1;AT3G09900.1	AT3G46060.3;AT3G46060.2;AT3G46060.1	1549
NaN	NaN	NaN	16.0282	16.0728	15.967				-1	3	3	3	7.2	7.2	7.2	86.611	0	26.37	547710	40	14	AT3G46220.4;AT3G46220.3;AT3G46220.1;AT3G46220.2	AT3G46220.4;AT3G46220.3;AT3G46220.1;AT3G46220.2	1550
18.6938	18.6766	18.8115	16.9833	17.1937	16.8228				-1	19	19	19	34.3	34.3	34.3	97.266	0	271.94	8442700	44	84	AT3G46530.1;AT3G46710.1	AT3G46530.1	1551
NaN	NaN	NaN	NaN	NaN	NaN				-1	1	1	1	20.4	20.4	20.4	10.715	0.00041876	8.8285	35302	6	2	AT3G46560.1	AT3G46560.1	1552
18.0612	17.8953	18.0688	17.8454	17.8456	17.8479				-1	14	14	14	32.9	32.9	32.9	89.188	0	160.23	4239200	41	72	AT3G46740.1	AT3G46740.1	1553
16.6707	16.5482	16.3646	16.2083	15.8988	16.1329				-1	6	6	6	20.4	20.4	20.4	54.358	0	105.47	1436800	28	29	AT3G46780.1	AT3G46780.1	1554
17.0577	17.1234	17.1477	16.6056	16.9178	16.5904				-1	2	2	2	13.4	13.4	13.4	23.849	0	45.367	1021400	14	12	AT3G46830.2;AT3G46830.1;AT5G59150.2;AT1G07410.1;AT5G59150.1	AT3G46830.2;AT3G46830.1;AT5G59150.2;AT1G07410.1;AT5G59150.1	1555
19.3892	19.2976	NaN	18.6715	18.2157	18.3753				-1	11	2	2	70.5	17.2	17.2	13.693	0	20.053	3510400	6	19	AT3G47370.3;AT3G47370.2;AT3G47370.1	AT3G47370.3;AT3G47370.2;AT3G47370.1	1556
17.342	17.5843	17.5643	16.7876	16.7153	16.4014				-1	9	9	9	26.6	26.6	26.6	61.957	0	84.922	2432900	30	41	AT3G47450.2;AT3G47450.1	AT3G47450.2;AT3G47450.1	1557
NaN	15.5363	NaN	NaN	15.8053	NaN				-1	3	3	3	24.7	24.7	24.7	27.733	0	23.784	365270	11	8	AT3G47470.1	AT3G47470.1	1558
16.9984	17.0834	17.1791	16.9397	17.0197	16.8594				-1	8	7	7	35.7	32.8	32.8	42.405	0	193.86	3841700	21	58	AT3G47520.1	AT3G47520.1	1559
NaN	NaN	NaN	NaN	NaN	NaN				-1	2	2	2	4.2	4.2	4.2	110.9	0	12.387	7769.8	39	2	AT3G47570.1	AT3G47570.1	1560
NaN	NaN	NaN	NaN	NaN	NaN				-1	2	2	2	5.2	5.2	5.2	90.232	0	23.55	134780	46	4	AT3G47700.1	AT3G47700.1	1561
NaN	13.7579	NaN	14.7646	14.9014	NaN				-1	3	3	3	5.8	5.8	5.8	108.69	0	32.229	189840	41	8	AT3G47730.1;AT5G61730.1;AT5G61730.2;AT5G61690.1;AT5G61690.2	AT3G47730.1;AT5G61730.1;AT5G61730.2;AT5G61690.1;AT5G61690.2	1562
NaN	NaN	NaN	NaN	NaN	NaN				-1	2	2	2	5.2	5.2	5.2	105.48	0	17.006	97653	39	4	AT3G47750.1	AT3G47750.1	1563
NaN	NaN	NaN	NaN	NaN	NaN				-1	1	1	1	3.1	3.1	3.1	59.593	0.0011342	6.9603	71099	28	5	AT3G48090.2;AT3G48090.1	AT3G48090.2;AT3G48090.1	1564
15.4222	15.5205	15.659	15.3611	15.2227	15.174				-1	3	3	3	21.3	21.3	21.3	30.286	0	126.42	744350	7	21	AT3G48120.2;AT3G48120.1	AT3G48120.2;AT3G48120.1	1565
NaN	NaN	NaN	NaN	NaN	NaN				-1	1	1	1	13.6	13.6	13.6	10.019	0.0014875	6.7745	394760	5	3	AT3G48140.1	AT3G48140.1	1566
NaN	NaN	NaN	NaN	NaN	NaN				-1	1	1	1	4.1	4.1	4.1	70.874	0.0014909	6.8186	45043	35	2	AT3G48380.2;AT3G48380.1;AT3G48380.3	AT3G48380.2;AT3G48380.1;AT3G48380.3	1567
NaN	NaN	NaN	NaN	NaN	NaN				-1	1	1	1	1.9	1.9	1.9	72.584	0.00039246	7.4099	14478	29	1	AT3G48560.1	AT3G48560.1	1568
NaN	NaN	NaN	NaN	NaN	NaN				-1	1	1	1	23.2	23.2	23.2	7.683	0	34.841	231570	3	6	AT3G48570.1	AT3G48570.1	1569
14.7269	14.7413	NaN	15.6046	15.747	15.7206				-1	6	6	6	29	29	29	35.567	0	61.893	762610	14	22	AT3G48690.1;AT3G48700.1	AT3G48690.1	1570
NaN	NaN	NaN	15.6247	15.4241	15.4714				-1	4	4	4	12.8	12.8	12.8	48.004	0	37.102	362200	21	11	AT3G48720.1;AT5G63560.1	AT3G48720.1	1571
15.432	NaN	15.5126	15.4183	15.288	15.5594				-1	2	2	2	8.5	8.5	8.5	50.141	0	13.69	335300	19	11	AT3G48730.1;AT5G63570.2;AT5G63570.1	AT3G48730.1;AT5G63570.2;AT5G63570.1	1572
17.7571	17.8898	17.1007	17.3388	17.6221	17.712				-1	4	4	4	14.2	14.2	14.2	31.921	0	27.815	2633400	12	20	AT3G48740.1	AT3G48740.1	1573
NaN	NaN	NaN	16.4516	16.0904	NaN				-1	2	2	2	11.9	11.9	11.9	34.03	0	14.375	411370	19	6	AT3G48750.1	AT3G48750.1	1574
NaN	NaN	NaN	NaN	NaN	NaN				-1	4	3	3	16	11.2	11.2	53.862	0	17.752	197710	28	7	AT3G48780.2;AT3G48780.1	AT3G48780.2;AT3G48780.1	1575
NaN	NaN	NaN	NaN	NaN	NaN				-1	1	1	1	3.6	3.6	3.6	30.509	0.0025585	6.564	390850	15	4	AT3G48800.1;AT5G23680.1	AT3G48800.1;AT5G23680.1	1576
17.5466	17.2082	17.3323	17.0286	16.9685	17.1511				-1	25	7	7	40.3	9.4	9.4	102.24	0	136.07	1831200	46	29	AT3G48870.2;AT3G48870.4;AT3G48870.3;AT3G48870.1	AT3G48870.2;AT3G48870.4;AT3G48870.3;AT3G48870.1	1577
NaN	NaN	NaN	NaN	NaN	NaN				-1	2	1	1	17.6	11.2	11.2	25.382	0.00077042	7.1912	37288	11	2	AT3G48890.1	AT3G48890.1	1578
19.0381	18.7855	18.888	18.8711	18.9165	18.9254				-1	8	8	4	46.9	46.9	25.6	17.957	0	140.79	9909500	9	49	AT3G48930.1;AT4G30800.1	AT3G48930.1	1579
17.3125	17.3372	17.3622	18.0009	18.0073	18.1772				-1	12	12	12	35.8	35.8	35.8	55.544	0	293.29	5351100	22	59	AT3G48990.1	AT3G48990.1	1580
18.3289	18.5182	18.4422	18.4881	18.5534	18.6378				-1	12	12	9	60.2	60.2	42.2	23.767	0	236.68	8535600	10	55	AT3G49010.7;AT3G49010.6;AT3G49010.3;AT3G49010.2;AT3G49010.1;AT3G49010.4;AT3G49010.5;AT3G48960.1	AT3G49010.7;AT3G49010.6;AT3G49010.3;AT3G49010.2;AT3G49010.1;AT3G49010.4;AT3G49010.5	1581
NaN	NaN	NaN	NaN	14.6774	14.8333				-1	2	2	2	8.6	8.6	8.6	47.987	0	15.478	241230	21	8	AT3G49080.1	AT3G49080.1	1582
NaN	NaN	NaN	NaN	NaN	NaN				-1	1	1	1	2.6	2.6	2.6	52.276	0.0049893	6.1813	80672	21	3	AT5G24060.3;AT5G24060.1;AT5G24060.2;AT3G49140.1	AT5G24060.3;AT5G24060.1;AT5G24060.2;AT3G49140.1	1583
NaN	NaN	NaN	NaN	NaN	NaN				-1	1	1	1	2	2	2	76.735	0.0059796	6.0473	664720	45	3	AT3G49142.1	AT3G49142.1	1584
NaN	NaN	NaN	NaN	NaN	NaN				-1	2	1	1	10.8	7.4	7.4	33.462	0.00042105	9.0573	300700	14	6	AT3G49430.2;AT3G49430.7;AT3G49430.6;AT3G49430.5;AT3G49430.4;AT3G49430.3;AT3G49430.1	AT3G49430.2;AT3G49430.7;AT3G49430.6;AT3G49430.5;AT3G49430.4;AT3G49430.3;AT3G49430.1	1585
NaN	NaN	NaN	NaN	NaN	NaN				-1	1	1	1	6.9	6.9	6.9	23.712	0	15.034	259880	11	5	AT3G49470.1	AT3G49470.1	1586
18.0136	18.3373	18.083	17.7189	17.6811	17.5036				-1	13	13	13	32.3	32.3	32.3	68.352	0	317.19	5756700	25	63	AT3G49601.1	AT3G49601.1	1587
NaN	NaN	NaN	NaN	NaN	NaN				-1	5	1	1	8.5	1.1	1.1	109.24	0.00042141	9.0941	109800	45	3	AT3G49670.1	AT3G49670.1	1588
15.2988	NaN	NaN	15.4036	15.6174	NaN				-1	2	2	2	9.2	9.2	9.2	28.532	0	14.035	405380	13	9	AT3G49720.3;AT3G49720.2;AT3G49720.1;AT5G65810.1	AT3G49720.3;AT3G49720.2;AT3G49720.1;AT5G65810.1	1589
15.1466	14.9516	14.8919	14.8945	14.9111	15.0789				-1	3	3	1	35.2	35.2	12.7	18.079	0	36.159	440640	9	16	AT3G49870.2;AT3G49870.1	AT3G49870.2;AT3G49870.1	1590
20.7302	20.6984	20.7385	19.9861	20.0076	19.8672				-1	4	4	4	29.5	29.5	29.5	16.944	0	96.7	10091000	6	19	AT3G49910.1	AT3G49910.1	1591
NaN	NaN	NaN	NaN	NaN	NaN				-1	2	2	2	15.6	15.6	15.6	31.358	0	21.724	165960	11	5	AT3G50440.1	AT3G50440.1	1592
NaN	NaN	NaN	17.3529	17.4309	17.4525				-1	10	10	10	11.2	11.2	11.2	174.99	0	120.57	1539500	79	29	AT3G50590.2;AT3G50590.1	AT3G50590.2;AT3G50590.1	1593
NaN	15.916	NaN	15.4929	15.4015	15.2456				-1	3	3	3	10.1	10.1	10.1	50.388	0	77.097	355650	20	11	AT3G50670.1	AT3G50670.1	1594
NaN	NaN	NaN	NaN	NaN	NaN				-1	1	1	1	8.1	8.1	8.1	45.17	0	15.789	48809	16	2	AT3G50790.2;AT3G50790.1	AT3G50790.2;AT3G50790.1	1595
NaN	NaN	NaN	NaN	NaN	NaN				-1	2	2	1	17.6	17.6	10.9	20.909	0.00043066	10.145	11045	6	1	AT3G50970.1	AT3G50970.1	1596
NaN	NaN	NaN	NaN	NaN	NaN				-1	1	1	1	6.9	6.9	6.9	21.528	0	16.44	22082	8	2	AT3G51010.1	AT3G51010.1	1597
15.1088	15.3767	15.3958	NaN	NaN	NaN				-1	4	4	4	7.6	7.6	7.6	77.674	0	69.281	394320	29	12	AT3G51050.1	AT3G51050.1	1598
16.113	15.9119	16.0231	18.2682	18.1913	18.1529				-1	10	10	6	37.5	37.5	26.8	41.961	0	323.31	6298200	22	62	AT3G51160.1	AT3G51160.1	1599
15.521	15.5501	15.4355	15.9546	16.0378	16.0789				-1	9	9	9	38.8	38.8	38.8	40.275	0	103.37	1606900	19	36	AT3G51240.1;AT3G51240.2	AT3G51240.1;AT3G51240.2	1600
15.4351	NaN	NaN	15.1396	15.1643	NaN				-1	2	2	2	18.8	18.8	18.8	27.337	0	38.067	262890	15	9	AT3G51260.1;AT3G51260.2;AT5G66140.1	AT3G51260.1;AT3G51260.2;AT5G66140.1	1601
16.6974	16.437	16.6766	17.0359	17.0325	17.0084				-1	6	6	6	16.4	16.4	16.4	68.237	0	57.72	1457700	36	23	AT3G51460.1	AT3G51460.1	1602
NaN	NaN	NaN	15.8076	15.8925	NaN				-1	2	2	2	3.6	3.6	3.6	98.149	0	19.537	307370	45	8	AT3G51550.1	AT3G51550.1	1603
NaN	NaN	NaN	NaN	NaN	NaN				-1	2	2	2	16.1	16.1	16.1	26.07	0	23.509	158230	13	4	AT3G51610.1	AT3G51610.1	1604
NaN	NaN	NaN	NaN	NaN	NaN				-1	1	1	1	3.8	3.8	3.8	92.285	0.0049858	6.1719	582520	45	3	AT3G51640.3;AT3G51640.2;AT3G51640.1	AT3G51640.3;AT3G51640.2;AT3G51640.1	1605
16.0453	15.6876	15.6164	NaN	NaN	NaN				-1	3	3	3	13.2	13.2	13.2	46.51	0	75.158	328570	19	9	AT3G51670.1	AT3G51670.1	1606
NaN	NaN	NaN	NaN	NaN	NaN				-1	2	2	1	14.9	14.9	6.7	29.21	0	11.857	57204	15	3	AT3G51780.1	AT3G51780.1	1607
17.2841	17.7841	17.508	17.3547	17.3712	17.2087				-1	12	12	12	47	47	47	42.295	0	248.87	4375300	21	61	AT3G51800.3;AT3G51800.1;AT3G51800.2	AT3G51800.3;AT3G51800.1;AT3G51800.2	1608
NaN	NaN	NaN	NaN	NaN	NaN				-1	2	2	2	6.6	6.6	6.6	66.463	0	12.697	172310	31	7	AT3G51830.1	AT3G51830.1	1609
NaN	NaN	NaN	NaN	NaN	NaN				-1	3	3	3	11.1	11.1	11.1	46.901	0	17.515	53300	19	3	AT3G51850.3;AT3G51850.2;AT3G51850.1	AT3G51850.3;AT3G51850.2;AT3G51850.1	1610
17.3274	17.6288	16.2144	NaN	NaN	NaN				-1	2	2	2	16.1	16.1	16.1	18.319	0	89.763	729940	6	8	AT3G51880.4;AT3G51880.5;AT3G51880.3;AT3G51880.1;AT3G51880.2	AT3G51880.4;AT3G51880.5;AT3G51880.3;AT3G51880.1;AT3G51880.2	1611
NaN	NaN	NaN	NaN	NaN	NaN				-1	1	1	1	4.9	4.9	4.9	40.244	0.0011437	7.064	84471	17	4	AT3G52050.5;AT3G52050.8;AT3G52050.7;AT3G52050.4;AT3G52050.2;AT3G52050.1;AT3G52050.6;AT3G52050.3	AT3G52050.5;AT3G52050.8;AT3G52050.7;AT3G52050.4;AT3G52050.2;AT3G52050.1;AT3G52050.6;AT3G52050.3	1612
NaN	NaN	NaN	NaN	NaN	NaN				-1	1	1	1	18.1	18.1	18.1	13.563	0	10.879	111980	6	4	AT3G52090.1;AT3G52090.2	AT3G52090.1;AT3G52090.2	1613
NaN	NaN	NaN	NaN	NaN	NaN				-1	3	3	3	10.2	10.2	10.2	65.662	0	32.451	139280	33	7	AT3G52100.4;AT3G52100.3;AT3G52100.1;AT3G52100.2	AT3G52100.4;AT3G52100.3;AT3G52100.1;AT3G52100.2	1614
14.5471	14.8511	14.9673	15.2819	15.3189	15.0301				-1	8	8	8	11.2	11.2	11.2	152.52	0	62.361	549750	63	23	AT3G52140.3;AT3G52140.1;AT3G52140.2;AT3G52140.4	AT3G52140.3;AT3G52140.1;AT3G52140.2;AT3G52140.4	1615
NaN	NaN	NaN	NaN	NaN	NaN				-1	1	1	1	4.6	4.6	4.6	32.314	0	11.047	363400	19	6	AT3G52180.4;AT3G52180.1	AT3G52180.4;AT3G52180.1	1616
20.3948	20.4073	20.3405	19.7831	19.6322	19.984				-1	31	31	31	58.6	58.6	58.6	68.862	0	323.31	58750000	34	229	AT3G52200.1;AT3G52200.2	AT3G52200.1;AT3G52200.2	1617
15.1076	15.1369	15.365	15.0998	15.0537	15.2133				-1	4	4	4	38.1	38.1	38.1	19.586	0	41.745	641950	10	20	AT3G52300.1;AT3G52300.2	AT3G52300.1;AT3G52300.2	1618
NaN	NaN	NaN	NaN	NaN	NaN				-1	2	2	2	10.6	10.6	10.6	48.678	0	12.168	85951	25	3	AT3G52340.7;AT3G52340.3;AT3G52340.2;AT3G52340.1;AT3G52340.5;AT3G52340.4;AT3G52340.6	AT3G52340.7;AT3G52340.3;AT3G52340.2;AT3G52340.1;AT3G52340.5;AT3G52340.4;AT3G52340.6	1619
NaN	NaN	NaN	NaN	NaN	NaN				-1	2	2	2	13.8	13.8	13.8	37.836	0	91.583	418320	17	7	AT3G52400.1	AT3G52400.1	1620
15.1333	15.1307	15.1296	15.3907	15.161	15.4775				-1	5	5	5	52.1	52.1	52.1	16.533	0	70.743	452900	9	17	AT3G52560.1;AT3G52560.2;AT3G52560.4;AT2G36060.3;AT2G36060.1;AT3G52560.3;AT2G36060.2;AT1G70660.2;AT1G23260.1;AT1G70660.1;AT1G70650.2	AT3G52560.1;AT3G52560.2;AT3G52560.4;AT2G36060.3;AT2G36060.1	1621
NaN	18.8381	18.7306	NaN	NaN	18.3945				-1	5	1	1	52	18.7	18.7	16.238	0	51.238	2124400	6	9	AT3G52580.1	AT3G52580.1	1622
NaN	NaN	NaN	NaN	NaN	NaN				-1	1	1	1	19.4	19.4	19.4	8.4485	0	13.851	707810	4	5	AT3G52730.1	AT3G52730.1	1623
NaN	NaN	NaN	15.2278	15.2999	15.2693				-1	4	4	4	20.3	20.3	20.3	46.487	0	47.998	393750	27	11	AT3G52880.1;AT3G52880.2	AT3G52880.1;AT3G52880.2	1624
17.5679	17.4992	18.0749	NaN	NaN	16.3784				-1	6	6	3	41.8	41.8	20.3	20.667	0	80.166	1533400	8	17	AT3G52920.2;AT3G52920.1	AT3G52920.2;AT3G52920.1	1625
21.2628	21.322	21.5411	22.0611	22.0202	22.1019				-1	32	32	24	86.3	86.3	55.6	38.539	0	323.31	155470000	23	241	AT3G52930.1;AT4G26530.3;AT4G26530.2;AT4G26530.1	AT3G52930.1	1626
NaN	NaN	NaN	NaN	NaN	NaN				-1	1	1	1	3.2	3.2	3.2	60.026	0.006641	6.001	93126	28	4	AT3G52950.2;AT3G52950.1	AT3G52950.2;AT3G52950.1	1627
NaN	NaN	NaN	NaN	NaN	NaN				-1	2	2	2	14.1	14.1	14.1	24.684	0	12.995	134680	16	4	AT3G52960.1	AT3G52960.1	1628
NaN	NaN	NaN	NaN	NaN	NaN				-1	6	1	1	22.6	5.1	5.1	51.889	0	72.004	356390	24	7	AT3G52990.2;AT3G52990.1	AT3G52990.2;AT3G52990.1	1629
NaN	NaN	NaN	NaN	NaN	NaN				-1	1	1	1	2.7	2.7	2.7	52.084	0.0049911	6.1855	29045	21	1	AT3G53040.1	AT3G53040.1	1630
NaN	NaN	NaN	16.1014	16.1719	NaN				-1	2	2	2	3.2	3.2	3.2	128.48	0	21.839	318690	63	6	AT3G53090.2;AT3G53090.1	AT3G53090.2;AT3G53090.1	1631
18.8942	18.9057	18.9313	18.7217	18.6532	18.7057				-1	25	25	25	64.9	64.9	64.9	55.383	0	323.31	22147000	30	178	AT3G53110.1	AT3G53110.1	1632
NaN	NaN	NaN	NaN	NaN	NaN				-1	2	2	2	13.4	13.4	13.4	24.94	0	16.211	132930	12	5	AT3G53120.1	AT3G53120.1	1633
19.8384	20.5705	20.7782	19.0284	NaN	18.7604				-1	2	2	1	17.4	17.4	5.2	30.474	0	19.185	6411000	7	13	AT3G53420.2;AT3G53420.1	AT3G53420.2;AT3G53420.1	1634
NaN	NaN	NaN	NaN	NaN	NaN				-1	4	4	4	5.2	5.2	5.2	164.1	0	26.304	114980	66	6	AT3G53480.1;AT2G37280.4;AT2G37280.2;AT2G37280.1;AT2G37280.3	AT3G53480.1	1635
NaN	NaN	NaN	NaN	NaN	NaN				-1	1	1	1	7	7	7	26.772	0.0032456	6.3509	81084	11	2	AT3G53500.3;AT3G53500.1;AT3G53500.2	AT3G53500.3;AT3G53500.1;AT3G53500.2	1636
NaN	NaN	NaN	NaN	NaN	NaN				-1	2	2	2	8.5	8.5	8.5	39.646	0	24.955	115220	23	7	AT3G53520.3;AT3G53520.2;AT3G53520.1;AT3G53520.4	AT3G53520.3;AT3G53520.2;AT3G53520.1;AT3G53520.4	1637
NaN	NaN	NaN	NaN	NaN	NaN				-1	1	1	1	7.9	7.9	7.9	38.664	0.0011429	7.0533	93470	19	3	AT3G53560.1;AT3G53560.2	AT3G53560.1;AT3G53560.2	1638
15.1913	14.9726	NaN	NaN	NaN	NaN				-1	3	3	3	14.6	14.6	14.6	38.984	0	18.098	224110	20	8	AT3G53580.1	AT3G53580.1	1639
17.5947	17.4944	17.5981	17.4444	17.405	17.1574				-1	5	5	5	13.6	13.6	13.6	75.977	0	130.53	2581500	30	26	AT3G53810.1	AT3G53810.1	1640
NaN	NaN	NaN	NaN	NaN	NaN				-1	15	1	1	37.3	8.8	8.8	27.349	0	35.167	683400	16	6	AT3G53870.1	AT3G53870.1	1641
17.2563	17.0812	17.2228	16.8317	16.8617	16.8744				-1	4	4	2	76.8	76.8	19.5	9.0741	0	111.22	1560500	2	19	AT3G53890.2;AT3G53890.1	AT3G53890.2;AT3G53890.1	1642
17.1616	17.1651	17.0777	16.9909	16.8235	17.0412				-1	4	4	4	51.9	51.9	51.9	17.793	0	111.29	2794500	11	36	AT3G53990.1;AT3G53990.2	AT3G53990.1;AT3G53990.2	1643
NaN	NaN	NaN	NaN	NaN	NaN				-1	4	1	1	9	2.4	2.4	54.789	0.0011481	7.1113	62693	24	1	AT3G54030.1	AT3G54030.1	1644
NaN	NaN	NaN	NaN	NaN	NaN				-1	1	1	1	5.7	5.7	5.7	53.78	0.0079723	5.9369	51353	22	2	AT3G54090.1	AT3G54090.1	1645
16.0694	15.9456	16.2929	15.4049	15.4412	15.2336				-1	5	5	5	24.5	24.5	24.5	32.662	0	45.557	795300	18	20	AT3G54110.1	AT3G54110.1	1646
NaN	NaN	NaN	NaN	NaN	NaN				-1	2	2	2	12.8	12.8	12.8	23.481	0	23.905	128080	9	2	AT3G54210.1	AT3G54210.1	1647
15.4204	15.1803	14.8793	15.484	15.51	15.577				-1	4	4	4	14.7	14.7	14.7	51.85	0	48.229	772340	23	23	AT3G54470.1	AT3G54470.1	1648
16.3395	16.8287	16.5698	16.4942	16.4307	16.2807				-1	7	7	7	14.5	14.5	14.5	80.48	0	100	1139100	32	22	AT3G54540.2;AT3G54540.1	AT3G54540.2;AT3G54540.1	1649
NaN	NaN	NaN	NaN	NaN	NaN				-1	1	1	1	9.9	9.9	9.9	25.003	0	20.15	21881	12	5	AT3G54826.1	AT3G54826.1	1650
NaN	NaN	NaN	NaN	NaN	NaN				-1	1	1	1	1.3	1.3	1.3	105.07	0.0076575	5.961	4763.4	52	1	AT3G54870.3;AT3G54870.1;AT3G54870.2	AT3G54870.3;AT3G54870.1;AT3G54870.2	1651
17.9068	17.8885	16.2824	17.481	17.9256	17.5362				-1	3	3	3	25.4	25.4	25.4	23.262	0	27.99	1813200	8	16	AT3G54890.4;AT3G54890.1;AT3G54890.3;AT3G54890.2	AT3G54890.4;AT3G54890.1;AT3G54890.3;AT3G54890.2	1652
NaN	NaN	NaN	NaN	NaN	NaN				-1	2	2	2	19.7	19.7	19.7	19.309	0	13.374	214150	7	6	AT3G54900.1	AT3G54900.1	1653
NaN	NaN	NaN	NaN	NaN	NaN				-1	1	1	1	7.8	7.8	7.8	29.185	0.00077071	7.1952	98486	15	6	AT3G55005.1	AT3G55005.1	1654
NaN	14.7189	NaN	14.8305	NaN	NaN				-1	3	3	3	5.9	5.9	5.9	91.753	0	35.877	251070	35	9	AT3G55020.1;AT3G55020.3;AT3G55020.2	AT3G55020.1;AT3G55020.3	1655
NaN	NaN	NaN	NaN	NaN	NaN				-1	2	2	2	4.5	4.5	4.5	78.699	0	17.938	48533	35	3	AT3G55110.1	AT3G55110.1	1656
NaN	NaN	NaN	NaN	NaN	NaN				-1	1	1	1	5.3	5.3	5.3	26.595	0.00041806	8.7659	372190	16	6	AT3G55120.1	AT3G55120.1	1657
15.181	15.0977	15.2521	15.3161	15.3351	15.3127				-1	4	4	4	6.8	6.8	6.8	134.97	0	80.429	559910	52	16	AT3G55220.1;AT3G55200.3;AT3G55200.2;AT3G55200.1	AT3G55220.1;AT3G55200.3;AT3G55200.2;AT3G55200.1	1658
15.3257	NaN	NaN	NaN	NaN	13.8986				-1	4	2	2	4	1.8	1.8	155.15	0	15.214	174130	64	8	AT3G55320.1	AT3G55320.1	1659
15.7937	15.7374	15.6386	15.6858	15.7171	15.8559				-1	3	3	3	8.1	8.1	8.1	35.723	0	81.968	1093900	13	28	AT3G55360.1	AT3G55360.1	1660
15.9194	15.986	16.1399	16.1208	15.8147	16.2298				-1	7	7	7	9.1	9.1	9.1	115.16	0	104.35	784640	48	21	AT3G55410.1;AT3G55410.2;AT5G65750.1	AT3G55410.1;AT3G55410.2	1661
17.0535	16.9901	17.0934	18.4003	18.3778	18.4049				-1	13	13	13	68.5	68.5	68.5	27.169	0	216.38	6027200	14	63	AT3G55440.1	AT3G55440.1	1662
16.5458	16.8892	16.73	16.1242	16.1039	15.6338				-1	2	2	2	13.4	13.4	13.4	29.567	0	14.84	762710	14	12	AT3G55460.1	AT3G55460.1	1663
14.7882	14.8328	14.7892	14.7253	14.859	14.9848				-1	4	4	4	9.2	9.2	9.2	78.87	0	74.454	448310	39	16	AT3G55610.1;AT3G55610.2;AT2G39800.2;AT2G39800.3;AT2G39800.4;AT2G39800.1	AT3G55610.1;AT3G55610.2	1664
NaN	NaN	NaN	16.9574	NaN	17.0873				-1	2	2	2	20	20	20	26.482	0	32.533	662340	9	8	AT3G55620.1	AT3G55620.1	1665
NaN	NaN	NaN	NaN	NaN	NaN				-1	4	1	1	51.4	24.3	24.3	12.785	0.00041946	8.8835	10710	5	1	AT3G55750.1;AT1G74270.1	AT3G55750.1;AT1G74270.1	1666
17.1388	17.3016	17.3009	17.0123	NaN	16.7575				-1	2	2	2	30.4	30.4	30.4	14.925	0	72.837	1123100	9	12	AT3G55770.6;AT3G55770.4;AT3G55770.5;AT3G55770.3;AT3G55770.2;AT3G55770.1;AT3G55770.7	AT3G55770.6;AT3G55770.4;AT3G55770.5;AT3G55770.3;AT3G55770.2;AT3G55770.1;AT3G55770.7	1667
NaN	NaN	NaN	NaN	NaN	NaN				-1	1	1	1	6.6	6.6	6.6	42.414	0.0011299	6.9178	103150	23	4	AT3G55800.1	AT3G55800.1	1668
16.125	16.1779	16.2039	16.4704	16.5691	16.4853				-1	8	8	8	14.2	14.2	14.2	102.95	0	110.67	1672300	48	40	AT3G56150.2;AT3G56150.1	AT3G56150.2;AT3G56150.1	1669
15.4927	NaN	NaN	16.49	16.0082	16.0615				-1	8	8	8	44.6	44.6	44.6	32.755	0	70.535	724210	20	17	AT3G56190.1;AT3G56190.2;AT3G56450.1	AT3G56190.1;AT3G56190.2	1670
NaN	15.9386	15.7559	17.2813	17.012	16.687				-1	7	7	6	19.1	19.1	19.1	48.534	0	49.604	1040800	29	20	AT3G56430.1	AT3G56430.1	1671
NaN	NaN	NaN	NaN	NaN	NaN				-1	1	1	1	11.6	11.6	11.6	16	0.00043103	10.209	195760	9	5	AT3G56490.1	AT3G56490.1	1672
14.2375	14.5426	NaN	NaN	NaN	NaN				-1	4	4	4	21.8	21.8	21.8	29.516	0	29.839	208500	14	10	AT3G56510.5;AT3G56510.4;AT3G56510.3;AT3G56510.2;AT3G56510.1	AT3G56510.5;AT3G56510.4;AT3G56510.3;AT3G56510.2;AT3G56510.1	1673
18.0219	18.205	18.8597	NaN	18.6825	18.2564				-1	2	2	2	23	23	23	16.361	0	20.099	2239400	6	13	AT3G56910.1	AT3G56910.1	1674
16.3713	16.2974	16.0825	16.0252	16.0721	15.9931				-1	5	5	5	17.8	17.8	17.8	47.63	0	76	1492100	22	30	AT3G56940.1;AT3G56940.2	AT3G56940.1;AT3G56940.2	1675
NaN	15.9326	NaN	15.4294	NaN	NaN				-1	3	3	3	15.1	15.1	15.1	33.829	0	49.995	336920	14	9	AT3G57000.1	AT3G57000.1	1676
NaN	NaN	NaN	NaN	NaN	NaN				-1	2	2	2	12.5	12.5	12.5	41.98	0	26.54	198880	21	6	AT3G57010.1	AT3G57010.1	1677
17.7554	18.062	17.8833	17.3566	17.5047	17.311				-1	23	23	23	42.1	42.1	42.1	63.026	0	286.19	6458000	32	111	AT3G57150.1	AT3G57150.1	1678
NaN	NaN	NaN	NaN	NaN	NaN				-1	3	3	3	11.6	11.6	11.6	51.749	0	20.542	388490	28	8	AT3G57290.1	AT3G57290.1	1679
NaN	NaN	NaN	NaN	NaN	NaN				-1	2	1	1	2.9	1.9	1.9	111.94	0	19.356	278010	44	6	AT3G57330.1	AT3G57330.1	1680
NaN	NaN	NaN	14.5726	14.7718	NaN				-1	2	2	2	5.5	5.5	5.5	80.753	0	13.13	185630	39	6	AT3G57410.10;AT3G57410.6;AT3G57410.9;AT3G57410.8;AT3G57410.7;AT3G57410.5;AT3G57410.4;AT3G57410.3;AT3G57410.2;AT3G57410.1	AT3G57410.10;AT3G57410.6;AT3G57410.9;AT3G57410.8;AT3G57410.7;AT3G57410.5;AT3G57410.4;AT3G57410.3;AT3G57410.2;AT3G57410.1	1681
15.635	NaN	15.5341	NaN	NaN	NaN				-1	5	3	3	12.6	10.4	10.4	60.935	0	32.727	227450	28	7	AT3G57530.1;AT3G57530.2	AT3G57530.1;AT3G57530.2	1682
NaN	NaN	NaN	NaN	NaN	NaN				-1	1	1	1	6.3	6.3	6.3	36.595	0.0007719	7.2136	108800	19	5	AT3G57560.1	AT3G57560.1	1683
15.232	15.1442	15.493	15.2284	15.3845	15.6533				-1	8	8	8	31.2	31.2	31.2	52.964	0	61.875	1095100	29	38	AT3G57610.1	AT3G57610.1	1684
NaN	NaN	NaN	NaN	NaN	NaN				-1	1	1	1	1.2	1.2	1.2	186.04	0.00039386	7.4403	39856	85	2	AT3G57660.2;AT3G57660.1	AT3G57660.2;AT3G57660.1	1685
NaN	NaN	NaN	NaN	NaN	NaN				-1	1	1	1	16.2	16.2	16.2	17.985	0.0011265	6.8919	263400	5	6	AT3G57870.1	AT3G57870.1	1686
16.0408	15.5777	14.9633	18.2895	18.1975	18.0953				-1	7	7	7	22.3	22.3	22.3	62.778	0	254.97	2861600	25	32	AT3G57890.1;AT3G57890.2;AT2G42230.1;AT2G42230.2	AT3G57890.1;AT3G57890.2	1687
NaN	NaN	NaN	NaN	NaN	NaN				-1	1	1	1	9.9	9.9	9.9	15.84	0.00043403	10.492	19102	9	1	AT3G57930.2;AT3G57930.1	AT3G57930.2;AT3G57930.1	1688
16.3284	16.3272	15.9914	NaN	NaN	NaN				-1	9	9	9	41.1	41.1	41.1	39.891	0	93.741	1117400	17	26	AT3G57990.1	AT3G57990.1	1689
NaN	NaN	NaN	NaN	NaN	NaN				-1	1	1	1	6.7	6.7	6.7	34.092	0	14.289	59502	17	3	AT3G58180.1	AT3G58180.1	1690
16.2315	16.2452	15.9595	19.2172	19.1117	19.1806				-1	9	9	4	51.4	51.4	24.9	35.767	0	301.77	4387200	16	40	AT3G58500.1	AT3G58500.1	1691
17.2036	17.1842	17.0786	17.163	17.0208	17.2214				-1	10	10	10	25.2	25.2	25.2	66.025	0	80.043	2347900	30	33	AT3G58510.3;AT3G58510.2;AT3G58510.1;AT2G42520.3;AT2G42520.2;AT2G42520.1;AT3G58570.1	AT3G58510.3;AT3G58510.2;AT3G58510.1	1692
NaN	NaN	NaN	NaN	NaN	NaN				-1	1	1	1	5	5	5	33.917	0	24.732	46818	18	3	AT3G58600.1	AT3G58600.1	1693
17.5856	17.4696	17.6206	17.5919	17.5739	17.8181				-1	12	12	12	31.6	31.6	31.6	63.812	0	241.72	3311600	27	47	AT3G58610.3;AT3G58610.2;AT3G58610.1	AT3G58610.3;AT3G58610.2;AT3G58610.1	1694
15.8465	16.0413	16.1698	15.6979	15.7836	15.7529				-1	3	3	3	13.2	13.2	13.2	49.97	0	51.753	695540	18	15	AT3G58660.1	AT3G58660.1	1695
NaN	NaN	NaN	NaN	NaN	NaN				-1	2	2	2	9.5	9.5	9.5	43.951	0	11.688	11892	25	2	AT3G58690.1	AT3G58690.1	1696
17.7063	17.6582	17.5223	19.9231	19.5773	19.6278				-1	11	11	11	46.7	46.7	46.7	29.058	0	242.1	7648700	17	35	AT3G58730.1	AT3G58730.1	1697
NaN	NaN	NaN	NaN	NaN	NaN				-1	2	2	1	8	8	3.7	56.602	0	12.198	27895	20	2	AT3G58750.1	AT3G58750.1	1698
16.4871	16.6477	16.3895	NaN	NaN	NaN				-1	4	4	4	21.4	21.4	21.4	41.388	0	38.965	490660	23	11	AT3G58760.6;AT3G58760.4;AT3G58760.2;AT3G58760.1;AT3G58760.5;AT3G58760.3	AT3G58760.6;AT3G58760.4;AT3G58760.2;AT3G58760.1;AT3G58760.5;AT3G58760.3	1699
15.0861	14.8567	NaN	NaN	NaN	NaN				-1	3	3	3	13.8	13.8	13.8	36.595	0	23.565	201240	16	10	AT3G58840.2;AT3G58840.1	AT3G58840.2;AT3G58840.1	1700
NaN	NaN	NaN	NaN	NaN	NaN				-1	2	2	2	9.5	9.5	9.5	27.208	0	13.462	180340	18	4	AT3G58990.1;AT2G43090.1;AT2G43100.1	AT3G58990.1;AT2G43090.1;AT2G43100.1	1701
NaN	NaN	NaN	NaN	NaN	NaN				-1	3	3	3	5.6	5.6	5.6	117.64	0	44.496	165140	45	5	AT3G59020.1;AT3G59020.2	AT3G59020.1;AT3G59020.2	1702
NaN	NaN	NaN	14.9031	14.9527	NaN				-1	2	2	2	6.6	6.6	6.6	57.117	0	17.068	192670	31	7	AT3G59110.1;AT2G42960.2;AT2G42960.5;AT2G42960.4;AT2G42960.3;AT2G42960.1	AT3G59110.1;AT2G42960.2;AT2G42960.5;AT2G42960.4;AT2G42960.3;AT2G42960.1	1703
NaN	NaN	NaN	NaN	NaN	NaN				-1	1	1	1	1.4	1.4	1.4	162.81	0.0049645	6.1524	9302.7	66	1	AT3G59140.1	AT3G59140.1	1704
NaN	NaN	NaN	NaN	15.6834	15.5362				-1	2	2	2	24.7	24.7	24.7	16.603	0	16.963	246810	5	7	AT3G59600.1;AT1G54250.1	AT3G59600.1;AT1G54250.1	1705
NaN	NaN	NaN	NaN	NaN	NaN				-1	1	1	1	3.6	3.6	3.6	50.026	0.0039483	6.2667	4966100	25	5	AT3G59730.2;AT3G59730.1	AT3G59730.2;AT3G59730.1	1706
NaN	NaN	NaN	NaN	NaN	NaN				-1	1	1	1	1.3	1.3	1.3	155.37	0.00039984	7.7646	19823	71	1	AT3G59770.2;AT3G59770.4;AT3G59770.1;AT3G59770.3	AT3G59770.2;AT3G59770.4;AT3G59770.1;AT3G59770.3	1707
NaN	NaN	NaN	NaN	NaN	NaN				-1	1	1	1	9.7	9.7	9.7	15.551	0	20.584	276070	4	6	AT3G59800.2;AT3G59800.1	AT3G59800.2;AT3G59800.1	1708
17.2905	16.9028	17.1178	16.1143	16.0912	16.1907				-1	11	11	7	46.4	46.4	29.7	49.538	0	176.81	2659400	23	47	AT3G59920.1	AT3G59920.1	1709
16.0365	15.7201	16.4683	17.2596	17.3899	17.5058				-1	18	18	15	41.4	41.4	38.2	66.288	0	188.21	3428300	33	65	AT3G59970.3;AT3G59970.2;AT3G59970.1	AT3G59970.3;AT3G59970.2;AT3G59970.1	1710
NaN	NaN	NaN	NaN	NaN	NaN				-1	2	2	2	9.8	9.8	9.8	49.059	0	17.345	139930	17	6	AT3G59990.4;AT3G59990.3;AT3G59990.2;AT3G59990.1	AT3G59990.4;AT3G59990.3;AT3G59990.2;AT3G59990.1	1711
18.931	18.9358	19.0291	18.554	18.5524	18.6572				-1	30	27	26	64.3	60.7	59.5	69.803	0	323.31	12557000	38	124	AT3G60190.1	AT3G60190.1	1712
NaN	16.9466	16.9989	16.5523	16.3191	NaN				-1	3	3	3	31.5	31.5	31.5	10.241	0	45.737	816190	4	14	AT3G60245.1;AT3G10950.1	AT3G60245.1	1713
NaN	NaN	NaN	NaN	NaN	NaN				-1	1	1	1	8.3	8.3	8.3	27.149	0.00041545	8.5633	89059	9	3	AT3G60360.1	AT3G60360.1	1714
NaN	NaN	NaN	NaN	NaN	NaN				-1	1	1	1	7.8	7.8	7.8	23.935	0	33.888	361140	14	6	AT3G60600.2;AT3G60600.3;AT3G60600.1	AT3G60600.2;AT3G60600.3;AT3G60600.1	1715
15.4497	15.3145	15.6048	15.4744	15.5266	15.5422				-1	7	7	7	17.2	17.2	17.2	79.838	0	51.515	838690	33	22	AT3G60750.2;AT3G60750.1;AT2G45290.2;AT2G45290.1	AT3G60750.2;AT3G60750.1	1716
NaN	NaN	NaN	NaN	NaN	NaN				-1	3	3	3	27.8	27.8	27.8	24.644	0	19.382	385610	13	5	AT3G60820.1;AT3G60820.3;AT3G60820.2	AT3G60820.1;AT3G60820.3;AT3G60820.2	1717
NaN	NaN	NaN	NaN	NaN	NaN				-1	1	1	1	7.2	7.2	7.2	39.904	0.00041135	8.3443	209520	19	6	AT3G60830.1	AT3G60830.1	1718
15.5213	15.8565	15.6252	17.4759	17.6692	17.4666				-1	10	9	9	10.2	9.6	9.6	199.63	0	101.72	1964600	87	35	AT3G60860.1	AT3G60860.1	1719
17.856	17.5613	17.7465	15.6296	NaN	15.605				-1	7	7	7	23.5	23.5	23.5	55.094	0	81.319	1882200	25	25	AT3G61050.2;AT3G61050.1;AT3G61030.1;AT3G60950.1	AT3G61050.2;AT3G61050.1	1720
NaN	NaN	NaN	NaN	NaN	NaN				-1	1	1	1	5.2	5.2	5.2	25.512	0.00039216	7.3821	71453	11	3	AT3G61070.3;AT3G61070.2;AT3G61070.1	AT3G61070.3;AT3G61070.2;AT3G61070.1	1721
NaN	NaN	NaN	NaN	NaN	NaN				-1	2	2	2	9.5	9.5	9.5	50.578	0	14.858	124680	21	7	AT3G61140.1	AT3G61140.1	1722
16.1645	16.2717	16.2052	16.1562	16.235	16.1482				-1	5	5	4	17.1	17.1	17.1	56.774	0	47.259	1061100	26	26	AT3G61240.1;AT3G61240.2;AT2G45810.1	AT3G61240.1;AT3G61240.2	1723
NaN	NaN	NaN	NaN	NaN	NaN				-1	4	4	4	19.3	19.3	19.3	23.144	0	26.402	439670	11	7	AT3G61260.1	AT3G61260.1	1724
NaN	16.1482	16.1012	15.5969	NaN	NaN				-1	3	3	3	18.6	18.6	18.6	39.941	0	115.45	434530	17	10	AT3G61415.2;AT3G61415.1;AT2G45950.4;AT2G45950.3;AT2G45950.1;AT2G45950.5;AT2G45950.2	AT3G61415.2;AT3G61415.1	1725
NaN	NaN	NaN	NaN	NaN	NaN				-1	4	1	1	24.8	6.3	6.3	30.688	0	33.955	508890	8	6	AT3G61430.2;AT3G61430.1	AT3G61430.2;AT3G61430.1	1726
15.7312	15.5842	15.6155	15.4165	15.4621	15.3805				-1	4	4	4	13.3	13.3	13.3	39.927	0	35.354	647320	18	17	AT3G61440.1;AT3G61440.4;AT3G61440.3;AT3G61440.2	AT3G61440.1;AT3G61440.4	1727
14.5572	NaN	14.6383	15.0557	NaN	14.9211				-1	1	1	1	7.8	7.8	7.8	27.755	0	26.172	259120	9	10	AT3G61470.1	AT3G61470.1	1728
NaN	NaN	NaN	NaN	NaN	NaN				-1	1	1	1	1.5	1.5	1.5	121.42	0.00040274	7.8744	70758	57	3	AT3G61480.1;AT5G28350.2;AT3G61480.2;AT5G28350.1	AT3G61480.1;AT5G28350.2;AT3G61480.2;AT5G28350.1	1729
NaN	NaN	NaN	NaN	NaN	NaN				-1	1	1	1	2.3	2.3	2.3	82.852	0.00076982	7.1765	101320	42	5	AT5G28370.1;AT5G28460.1;AT3G61520.1	AT5G28370.1;AT5G28460.1;AT3G61520.1	1730
NaN	NaN	NaN	NaN	NaN	NaN				-1	1	1	1	7.5	7.5	7.5	26.551	0.0035997	6.3261	87312	10	3	AT3G61620.2;AT3G61620.1	AT3G61620.2;AT3G61620.1	1731
NaN	NaN	NaN	NaN	NaN	NaN				-1	2	2	2	9.1	9.1	9.1	53.277	0	13.925	86593	25	3	AT5G05620.1;AT3G61650.1	AT5G05620.1;AT3G61650.1	1732
NaN	NaN	NaN	NaN	NaN	NaN				-1	4	1	1	13	5.6	5.6	68.083	0	16.182	497330	40	6	AT3G61760.1;AT3G61760.2;AT3G61760.3	AT3G61760.1;AT3G61760.2;AT3G61760.3	1733
15.3888	15.5181	15.6469	NaN	NaN	NaN				-1	2	2	2	7.7	7.7	7.7	51.461	0	23.697	395990	21	10	AT3G61820.1	AT3G61820.1	1734
17.7294	18.0791	17.9934	17.534	17.5151	17.2501				-1	15	15	15	40.6	40.6	40.6	59.173	0	244.77	6730700	33	69	AT3G62120.3;AT3G62120.2;AT3G62120.1	AT3G62120.3;AT3G62120.2;AT3G62120.1	1735
NaN	NaN	16.0717	16.2299	16.1683	NaN				-1	8	2	1	8.4	3.3	1.4	140.33	0	57.857	515510	58	10	AT3G62150.3;AT3G62150.2;AT3G62150.1	AT3G62150.3;AT3G62150.2;AT3G62150.1	1736
NaN	NaN	NaN	NaN	NaN	NaN				-1	3	3	3	6.8	6.8	6.8	90.223	0	19.706	91835	44	4	AT3G62240.1	AT3G62240.1	1737
NaN	NaN	NaN	NaN	NaN	NaN				-1	13	2	2	86.2	17.7	17.7	20.607	0	138.53	219940	10	4	AT3G62290.3;AT3G62290.2;AT3G62290.1	AT3G62290.3;AT3G62290.2;AT3G62290.1	1738
14.8575	15.4311	15.2492	NaN	15.1985	NaN				-1	3	3	3	22.2	22.2	22.2	24.503	0	32.694	472550	14	14	AT3G62530.1	AT3G62530.1	1739
NaN	NaN	NaN	16.2182	NaN	16.1405				-1	4	4	1	33.7	33.7	10.4	21.939	0	36.489	520730	13	10	AT3G62560.1	AT3G62560.1	1740
15.0634	15.0655	NaN	15.4675	NaN	15.4515				-1	2	2	2	5.2	5.2	5.2	39.199	0	29.064	389780	16	12	AT3G62600.1	AT3G62600.1	1741
15.0185	NaN	15.1574	15.4764	15.6022	15.4931				-1	5	5	5	6	6	6	172.14	0	39.829	448450	70	13	AT3G62700.1	AT3G62700.1	1742
NaN	NaN	NaN	NaN	NaN	NaN				-1	5	1	1	22.7	7.8	7.8	29.034	0	18.826	553240	11	6	AT3G62870.1	AT3G62870.1	1743
NaN	NaN	NaN	NaN	NaN	NaN				-1	3	3	2	16.1	16.1	10.4	35.672	0	20.06	118420	16	5	AT3G62940.5;AT3G62940.1;AT3G62940.4;AT3G62940.3;AT3G62940.2	AT3G62940.5;AT3G62940.1;AT3G62940.4;AT3G62940.3;AT3G62940.2	1744
15.1692	14.7856	15.1202	NaN	NaN	NaN				-1	3	3	3	27.2	27.2	27.2	19.327	0	37.476	247580	10	9	AT3G63080.1	AT3G63080.1	1745
15.4697	15.4817	15.4917	18.3464	18.2989	18.2588				-1	13	13	13	40.6	40.6	40.6	58.826	0	323.31	5832200	26	51	AT3G63130.2;AT3G63130.1	AT3G63130.2;AT3G63130.1	1746
NaN	NaN	NaN	NaN	NaN	NaN				-1	1	1	1	4.4	4.4	4.4	32.266	0.00042882	10.031	107700	14	4	AT3G63250.2;AT3G63250.3;AT3G63250.1	AT3G63250.2;AT3G63250.3;AT3G63250.1	1747
18.7295	18.4813	18.1635	16.2489	16.0385	16.1373				-1	9	9	9	34.3	34.3	34.3	42.582	0	163.51	3528800	23	34	AT3G63260.1;AT3G63260.2	AT3G63260.1;AT3G63260.2	1748
NaN	NaN	NaN	NaN	NaN	NaN				-1	1	1	1	3.1	3.1	3.1	42.249	0.0053097	6.1255	114850	16	3	AT3G63400.2;AT3G63400.4;AT3G63400.3;AT3G63400.1	AT3G63400.2;AT3G63400.4;AT3G63400.3;AT3G63400.1	1749
16.5105	NaN	16.3758	16.4409	16.433	16.4247				-1	4	4	4	16.3	16.3	16.3	37.926	0	55.998	1003200	18	19	AT3G63410.1	AT3G63410.1	1750
NaN	NaN	NaN	NaN	NaN	NaN				-1	1	1	1	20.4	20.4	20.4	10.947	0.00041789	8.7618	120680	6	2	AT3G63420.1;AT3G63420.2;AT3G63420.3	AT3G63420.1;AT3G63420.2;AT3G63420.3	1751
14.1448	NaN	14.6698	17.0169	17.0368	16.9725				-1	13	13	13	19.6	19.6	19.6	119.87	0	295.99	2972700	47	52	AT3G63460.1;AT3G63460.2;AT3G63460.3	AT3G63460.1;AT3G63460.2;AT3G63460.3	1752
16.3965	16.7006	16.1737	16.5292	16.2142	16.4877				-1	7	7	7	30.6	30.6	30.6	37.632	0	76.244	1589200	17	29	AT3G63490.1;AT3G63490.2	AT3G63490.1;AT3G63490.2	1753
17.1193	16.9583	17.0562	16.2399	16.2862	16.3339				-1	7	7	7	21.7	21.7	21.7	60.907	0	140.22	2516600	29	40	AT3G63520.1	AT3G63520.1	1754
NaN	NaN	NaN	15.6067	15.5372	15.6375				-1	3	3	3	9.9	9.9	9.9	61.018	0	29.738	369810	23	9	AT3G66658.1;AT3G66658.2	AT3G66658.1;AT3G66658.2	1755
NaN	NaN	NaN	NaN	NaN	NaN				-1	1	1	1	2.6	2.6	2.6	46.55	0.0049804	6.1677	27885	23	1	AT4G00090.1	AT4G00090.1	1756
19.3546	19.2797	19.3329	19.2971	19.2134	19.2504				-1	8	8	8	43	43	43	17.085	0	87.047	10019000	8	51	AT4G00100.1;AT3G60770.1	AT4G00100.1;AT3G60770.1	1757
NaN	NaN	NaN	NaN	NaN	NaN				-1	1	1	1	4.1	4.1	4.1	46.174	0.00040486	7.9565	17197	25	3	AT4G00330.2;AT4G00330.1	AT4G00330.2;AT4G00330.1	1758
15.9771	16.0101	16.2609	15.8489	15.9425	16.0069				-1	7	7	7	22.1	22.1	22.1	66.64	0	113.2	1281200	39	27	AT4G00570.1	AT4G00570.1	1759
NaN	NaN	NaN	14.6555	14.4617	14.5471				-1	2	2	2	12.5	12.5	12.5	38.741	0	14.93	163430	21	8	AT4G00620.1	AT4G00620.1	1760
NaN	NaN	NaN	NaN	NaN	NaN				-1	1	1	1	1.2	1.2	1.2	126.16	0.0025501	6.5089	13372	51	1	AT4G00630.1;AT4G00630.2	AT4G00630.1;AT4G00630.2	1761
NaN	NaN	NaN	NaN	NaN	NaN				-1	2	1	1	5.9	3.8	3.8	57.686	0.0014898	6.7956	213120	29	2	AT4G00660.2;AT4G00660.1	AT4G00660.2;AT4G00660.1	1762
18.008	17.8684	17.9302	17.7636	17.8279	17.7764				-1	18	18	15	53.8	53.8	46.4	54.913	0	323.31	7201700	27	78	AT4G00710.2;AT4G00710.1;AT1G01740.4;AT1G01740.3;AT1G01740.5;AT1G01740.2;AT1G01740.1	AT4G00710.2;AT4G00710.1	1763
NaN	NaN	NaN	17.468	17.5363	17.663				-1	2	2	2	50.4	50.4	50.4	11.307	0	45.556	1196800	3	10	AT4G00810.2;AT4G00810.1	AT4G00810.2;AT4G00810.1	1764
NaN	NaN	NaN	NaN	NaN	NaN				-1	2	2	2	4.3	4.3	4.3	115.83	0	15.312	71085	40	4	AT4G00900.2;AT4G00900.1	AT4G00900.2;AT4G00900.1	1765
NaN	15.356	15.4733	NaN	14.6907	NaN				-1	2	2	2	6	6	6	45.481	0	15.366	305930	18	9	AT4G01000.2;AT4G01000.1	AT4G01000.2;AT4G01000.1	1766
NaN	15.6976	15.3502	NaN	NaN	NaN				-1	3	3	3	10.8	10.8	10.8	61.232	0	25.713	297610	24	9	AT4G01037.1	AT4G01037.1	1767
NaN	NaN	NaN	NaN	NaN	NaN				-1	1	1	1	8	8	8	38.684	0	11.253	15739	14	1	AT4G01070.2;AT4G01070.1	AT4G01070.2;AT4G01070.1	1768
16.0419	15.6395	15.9541	15.906	15.901	15.9197				-1	4	4	4	16.5	16.5	16.5	38.325	0	79.777	892390	24	17	AT4G01100.1;AT4G01100.3;AT4G01100.2	AT4G01100.1;AT4G01100.3;AT4G01100.2	1769
15.9364	16.186	16.1439	15.9892	15.672	15.3777				-1	8	8	8	30.9	30.9	30.9	28.343	0	77.39	992190	19	27	AT4G01310.1	AT4G01310.1	1770
14.8062	NaN	NaN	14.9037	NaN	15.191				-1	3	3	3	14.4	14.4	14.4	42.851	0	21.887	158850	22	10	AT4G01370.1;AT1G01560.3;AT1G01560.2	AT4G01370.1	1771
NaN	NaN	NaN	NaN	NaN	NaN				-1	2	2	2	4.5	4.5	4.5	82.977	0	14.365	126190	41	3	AT4G01395.1	AT4G01395.1	1772
NaN	NaN	NaN	NaN	NaN	NaN				-1	2	2	2	7.8	7.8	7.8	39.344	0	17.054	313610	16	5	AT4G01610.2;AT4G01610.1	AT4G01610.2;AT4G01610.1	1773
NaN	NaN	NaN	NaN	NaN	NaN				-1	3	3	3	19.6	19.6	19.6	31.464	0	26.062	133970	14	5	AT4G01700.1	AT4G01700.1	1774
NaN	NaN	NaN	NaN	NaN	NaN				-1	1	1	1	1.7	1.7	1.7	96.003	0.00042992	10.082	19259	46	1	AT4G01810.3;AT4G01810.2;AT4G01810.1	AT4G01810.3;AT4G01810.2;AT4G01810.1	1775
16.5911	16.4993	16.6785	16.8147	16.8739	16.8587				-1	18	5	5	62.8	25.7	25.7	43.255	0	161.13	1610900	18	31	AT4G01850.2;AT4G01850.1	AT4G01850.2;AT4G01850.1	1776
NaN	NaN	NaN	15.7245	15.7572	15.6566				-1	5	5	5	7.6	7.6	7.6	88.515	0	39.345	468300	46	12	AT4G02030.1;AT4G02030.2	AT4G02030.1;AT4G02030.2	1777
NaN	NaN	NaN	NaN	NaN	NaN				-1	1	1	1	2.1	2.1	2.1	50.538	0.00041051	8.2856	174850	27	6	AT4G02120.4;AT4G02120.3;AT4G02120.5;AT4G02120.1;AT4G02120.2	AT4G02120.4;AT4G02120.3;AT4G02120.5;AT4G02120.1;AT4G02120.2	1778
NaN	NaN	NaN	NaN	NaN	NaN				-1	1	1	1	4.8	4.8	4.8	47.493	0	34.818	33538	21	3	AT4G02220.1	AT4G02220.1	1779
NaN	NaN	NaN	NaN	NaN	NaN				-1	6	1	1	17.8	8.2	8.2	24.201	0.00039154	7.37	119060	6	1	AT4G02230.1	AT4G02230.1	1780
NaN	NaN	NaN	NaN	NaN	NaN				-1	1	1	1	1.9	1.9	1.9	63.943	0.0011308	6.9254	58690	22	2	AT4G02330.1	AT4G02330.1	1781
NaN	NaN	NaN	NaN	NaN	NaN				-1	3	3	3	6.5	6.5	6.5	88.37	0	22.994	96107	43	6	AT4G02350.2;AT4G02350.1	AT4G02350.2;AT4G02350.1	1782
NaN	NaN	NaN	NaN	NaN	NaN				-1	3	3	3	4.4	4.4	4.4	96.759	0	31.057	172340	34	7	AT4G02400.1	AT4G02400.1	1783
NaN	15.6896	15.9599	16.7722	16.4538	16.3792				-1	4	4	4	18.3	18.3	18.3	25.341	0	49.632	793550	8	14	AT4G02450.2;AT4G02450.1	AT4G02450.2;AT4G02450.1	1784
NaN	NaN	NaN	NaN	NaN	NaN				-1	1	1	1	10.2	10.2	10.2	25.791	0.0028965	6.4287	3384800	10	3	AT4G02485.2;AT4G02485.1	AT4G02485.2;AT4G02485.1	1785
15.8659	15.8547	16.0167	15.7802	15.8095	15.7249				-1	8	8	8	9	9	9	160.82	0	158.67	1324500	80	35	AT4G02510.4;AT4G02510.3;AT4G02510.2;AT4G02510.1	AT4G02510.4;AT4G02510.3;AT4G02510.2;AT4G02510.1	1786
18.8139	18.6833	18.9083	19.2037	19.188	19.2928				-1	18	16	15	84.4	80.7	78.8	24.128	0	323.31	20736000	12	92	AT4G02520.1;AT2G02930.1	AT4G02520.1;AT2G02930.1	1787
NaN	NaN	NaN	NaN	NaN	NaN				-1	1	1	1	1.8	1.8	1.8	86.301	0.00039526	7.52	163460	38	4	AT4G02570.4;AT4G02570.3;AT4G02570.2;AT4G02570.1	AT4G02570.4;AT4G02570.3;AT4G02570.2;AT4G02570.1	1788
NaN	NaN	NaN	NaN	NaN	NaN				-1	1	1	1	5.1	5.1	5.1	28.388	0	20.349	201090	13	6	AT4G02580.1	AT4G02580.1	1789
NaN	NaN	NaN	NaN	NaN	NaN				-1	1	1	1	3	3	3	59.125	0	108.23	327220	22	6	AT4G02600.2;AT4G02600.1	AT4G02600.2;AT4G02600.1	1790
NaN	NaN	NaN	NaN	NaN	NaN				-1	1	1	1	25.8	25.8	25.8	14.259	0	19.499	203640	8	3	AT4G02620.1	AT4G02620.1	1791
18.1497	18.2354	17.9903	18.2198	18.0174	18.2301				-1	14	13	13	42.1	38.8	38.8	49.409	0	176.38	6657700	30	68	AT4G02930.1	AT4G02930.1	1792
NaN	NaN	NaN	NaN	NaN	NaN				-1	1	1	1	4.1	4.1	4.1	55.412	0.00040209	7.8309	57737	22	2	AT4G03020.3;AT4G03020.2;AT4G03020.1	AT4G03020.3;AT4G03020.2;AT4G03020.1	1793
NaN	NaN	NaN	NaN	NaN	NaN				-1	3	3	3	5.9	5.9	5.9	96.145	0	18.803	119400	47	4	AT4G03080.1	AT4G03080.1	1794
NaN	NaN	NaN	NaN	NaN	NaN				-1	1	1	1	2.9	2.9	2.9	76.845	0.0011261	6.8902	169460	39	2	AT4G03200.2;AT4G03200.1	AT4G03200.2;AT4G03200.1	1795
15.9491	15.9636	15.8891	15.8065	15.9713	15.6801				-1	3	3	3	21.9	21.9	21.9	22.533	0	27.219	856720	12	16	AT4G03280.2;AT4G03280.1	AT4G03280.2;AT4G03280.1	1796
NaN	NaN	NaN	NaN	NaN	NaN				-1	1	1	1	1.9	1.9	1.9	115.57	0.0049964	6.1967	6985.2	67	1	AT4G03430.3;AT4G03430.2;AT4G03430.1	AT4G03430.3;AT4G03430.2;AT4G03430.1	1797
NaN	NaN	NaN	NaN	NaN	NaN				-1	1	1	1	22.2	22.2	22.2	7.9261	0	44.65	226830	5	5	AT4G03520.2;AT4G03520.1	AT4G03520.2;AT4G03520.1	1798
15.7258	15.3472	15.622	NaN	NaN	NaN				-1	3	3	3	4.9	4.9	4.9	87.606	0	26.736	237010	40	7	AT4G04340.3;AT4G04340.2;AT4G04340.1	AT4G04340.3;AT4G04340.2;AT4G04340.1	1799
NaN	NaN	NaN	NaN	NaN	NaN				-1	1	1	1	5.4	5.4	5.4	45.851	0.00040453	7.9328	26728	23	2	AT4G04570.3;AT4G04570.2;AT4G04570.1	AT4G04570.3;AT4G04570.2;AT4G04570.1	1800
NaN	NaN	NaN	NaN	NaN	NaN				-1	1	1	1	6.2	6.2	6.2	20.069	0.002551	6.529	52592	8	4	AT4G04614.2;AT4G04614.1	AT4G04614.2;AT4G04614.1	1801
NaN	NaN	NaN	15.2413	15.2613	15.2572				-1	2	2	2	8.8	8.8	8.8	40.911	0	17.298	283270	20	8	AT4G04640.1	AT4G04640.1	1802
17.2728	16.8215	17.1334	15.5853	15.5462	15.2571				-1	9	9	8	28.1	28.1	28.1	54.696	0	141.49	2242000	30	32	AT4G04695.1	AT4G04695.1	1803
16.2461	15.8273	15.9796	14.025	14.7866	NaN				-1	8	6	6	22.9	17.9	17.9	54.898	0	93.587	595750	32	19	AT4G04700.1	AT4G04700.1	1804
15.7617	NaN	15.77	NaN	NaN	NaN				-1	2	2	2	6.8	6.8	6.8	53.04	0	16.843	252560	31	5	AT4G04710.3;AT4G04710.2;AT4G04710.1;AT4G04710.4	AT4G04710.3;AT4G04710.2;AT4G04710.1;AT4G04710.4	1805
19.6035	19.4372	19.5279	20.0785	20.2141	20.0315				-1	22	22	14	52.7	52.7	39.9	59.894	0	323.31	36257000	35	132	AT4G04720.2;AT4G04720.1;AT4G21940.3;AT4G21940.1;AT4G21940.2	AT4G04720.2;AT4G04720.1	1806
NaN	NaN	NaN	NaN	NaN	NaN				-1	1	1	1	3.8	3.8	3.8	61.867	0.00042283	9.329	113770	28	6	AT4G04770.1	AT4G04770.1	1807
NaN	NaN	NaN	NaN	NaN	NaN				-1	1	1	1	11.6	11.6	11.6	14.022	0	10.572	193840	9	5	AT4G04830.2;AT4G04830.1	AT4G04830.2;AT4G04830.1	1808
15.6372	15.7122	15.7154	15.87	16.02	15.8336				-1	8	8	8	16.2	16.2	16.2	81.486	0	87.683	1304700	40	40	AT4G04910.1	AT4G04910.1	1809
NaN	NaN	NaN	NaN	NaN	NaN				-1	2	2	2	8	8	8	53.115	0	129.32	57950	25	3	AT4G04950.1;AT4G32580.1	AT4G04950.1;AT4G32580.1	1810
NaN	NaN	NaN	NaN	NaN	NaN				-1	1	1	1	2.2	2.2	2.2	59.849	0.00042391	9.3803	61806	24	3	AT4G05160.1	AT4G05160.1	1811
NaN	NaN	NaN	13.9931	13.9171	NaN				-1	2	2	2	5.9	5.9	5.9	61.382	0	19.725	67091	31	5	AT4G05520.1;AT4G05520.2	AT4G05520.1;AT4G05520.2	1812
NaN	NaN	NaN	NaN	NaN	NaN				-1	1	1	1	8.1	8.1	8.1	14.557	0	12.028	46328	6	3	AT4G08240.2;AT4G08240.1	AT4G08240.2;AT4G08240.1	1813
NaN	NaN	NaN	NaN	NaN	NaN				-1	1	1	1	2.6	2.6	2.6	56.235	0	12.104	122370	25	4	AT4G08310.1	AT4G08310.1	1815
NaN	NaN	NaN	NaN	NaN	NaN				-1	1	1	1	3.7	3.7	3.7	51.257	0	13.333	229570	15	5	AT5G17900.1;AT4G08580.2;AT4G08580.1	AT5G17900.1;AT4G08580.2;AT4G08580.1	1816
16.5916	16.6572	16.351	16.2973	16.2449	16.1553				-1	11	11	11	14.2	14.2	14.2	115.42	0	102.71	2060400	47	40	AT4G08850.1;AT4G08850.2;AT1G35710.1	AT4G08850.1;AT4G08850.2	1817
19.3096	19.1697	19.2504	19.844	19.9296	19.9418				-1	17	17	10	70	70	50.2	29.931	0	323.31	19607000	18	106	AT4G09000.1;AT4G09000.2	AT4G09000.1;AT4G09000.2	1818
NaN	NaN	NaN	NaN	NaN	NaN				-1	1	1	1	1.7	1.7	1.7	86.321	0.0032526	6.4064	18274	35	1	AT4G09020.1	AT4G09020.1	1819
NaN	NaN	NaN	NaN	NaN	NaN				-1	3	2	2	4.8	3.3	3.3	72.956	0	13.593	116990	32	4	AT4G09160.3;AT4G09160.2;AT4G09160.1	AT4G09160.3;AT4G09160.2;AT4G09160.1	1820
17.79	17.6045	NaN	18.1215	NaN	18.5316				-1	6	6	5	55.7	55.7	55.7	16.5	0	78.41	2230000	9	16	AT4G09320.1	AT4G09320.1	1821
NaN	15.4252	NaN	15.9661	15.6456	15.7828				-1	2	2	2	7	7	7	56.416	0	33.258	473700	24	10	AT4G09570.1;AT5G23580.1;AT1G35670.1	AT4G09570.1;AT5G23580.1;AT1G35670.1	1822
NaN	NaN	NaN	16.456	16.3151	16.5736				-1	7	7	7	37	37	37	39.562	0	47.307	748040	19	14	AT4G09670.1	AT4G09670.1	1823
16.145	NaN	16.0441	NaN	NaN	NaN				-1	3	3	3	27.9	27.9	27.9	18.933	0	34.881	393020	12	8	AT4G09720.6;AT4G09720.5;AT4G09720.2;AT4G09720.1;AT4G09720.4;AT4G09720.3	AT4G09720.6;AT4G09720.5;AT4G09720.2;AT4G09720.1;AT4G09720.4;AT4G09720.3	1824
NaN	17.4561	NaN	17.1488	16.823	17.1042				-1	6	6	6	16.4	16.4	16.4	68.923	0	64.724	1158000	33	16	AT4G09730.1	AT4G09730.1	1825
18.1413	18.0912	18.0428	14.6055	14.6987	14.5729				-1	6	6	6	40.1	40.1	40.1	35.159	0	155.63	3301800	17	31	AT4G09750.1	AT4G09750.1	1826
NaN	NaN	NaN	NaN	NaN	NaN				-1	1	1	1	5.2	5.2	5.2	38.929	0.00077912	7.3026	94977	22	4	AT4G09900.1	AT4G09900.1	1827
NaN	NaN	NaN	NaN	NaN	NaN				-1	1	1	1	4.4	4.4	4.4	31.593	0.00040193	7.8254	62822	11	3	AT4G09950.2;AT4G09950.1	AT4G09950.2;AT4G09950.1	1828
NaN	15.2985	NaN	14.5437	NaN	NaN				-1	2	2	2	5.7	5.7	5.7	85.845	0	18.383	232480	37	9	AT4G09980.2;AT4G09980.1	AT4G09980.2;AT4G09980.1	1829
16.2401	16.2526	16.1996	15.578	15.5267	15.4167				-1	4	4	4	13.4	13.4	13.4	104.35	0	115.55	939330	40	20	AT4G10060.2;AT4G10060.1	AT4G10060.2;AT4G10060.1	1830
NaN	NaN	NaN	NaN	NaN	NaN				-1	1	1	1	3.9	3.9	3.9	28.361	0.00040967	8.2191	45917	13	3	AT4G10170.2;AT4G10170.1	AT4G10170.2;AT4G10170.1	1831
14.5136	14.4681	14.799	14.9579	15.4753	15.0652				-1	7	7	7	12.4	12.4	12.4	135.48	0	58.64	527790	58	21	AT4G10320.1	AT4G10320.1	1832
17.9972	18.0695	17.9245	17.9306	18.0651	17.8626				-1	8	8	8	45.7	45.7	45.7	30.156	0	185.77	5671400	16	50	AT4G10340.1	AT4G10340.1	1833
17.5932	17.7761	17.6651	17.3614	17.4722	17.2055				-1	12	8	8	61.9	52.1	52.1	21.973	0	130.72	4198600	10	42	AT4G10450.1;AT4G10450.2	AT4G10450.1;AT4G10450.2	1834
20.2677	20.616	20.5016	19.9178	19.8106	19.5199				-1	8	8	8	51.2	51.2	51.2	23.114	0	315.53	10570000	9	41	AT4G10480.2;AT4G10480.1	AT4G10480.2;AT4G10480.1	1835
NaN	14.7378	14.7376	NaN	NaN	NaN				-1	3	3	3	8.2	8.2	8.2	76.07	0	80.415	133950	35	7	AT4G10730.2;AT4G10730.1	AT4G10730.2;AT4G10730.1	1836
15.731	NaN	16.4676	NaN	15.7676	NaN				-1	4	4	4	14.2	14.2	14.2	38.404	0	37.562	485510	14	12	AT4G10750.1	AT4G10750.1	1837
14.9207	14.6498	14.7515	15.2993	NaN	15.1672				-1	2	2	2	8.8	8.8	8.8	52.802	0	26.432	517700	20	16	AT4G10790.1	AT4G10790.1	1838
NaN	NaN	NaN	NaN	NaN	NaN				-1	2	1	1	8	4.8	4.8	38.617	0	18.864	13150	19	1	AT4G10960.1;AT1G63180.2;AT1G63180.1	AT4G10960.1;AT1G63180.2;AT1G63180.1	1839
NaN	NaN	17.3363	NaN	NaN	17.3451				-1	2	2	2	19.3	19.3	19.3	25.734	0	38.606	1054200	14	8	AT4G11010.1;AT4G23900.1;AT4G23895.3	AT4G11010.1;AT4G23900.1;AT4G23895.3	1840
17.9017	17.8438	17.8962	20.2049	20.0985	20.1343				-1	22	22	15	77	77	61.3	26.06	0	323.31	23909000	15	121	AT4G11150.1;AT3G08560.1	AT4G11150.1	1841
15.7632	16.4422	16.0705	15.0181	15.0292	14.8965				-1	3	3	3	7	7	7	80.228	0	27.447	677810	35	20	AT4G11160.2;AT4G11160.1;AT4G11160.3	AT4G11160.2;AT4G11160.1;AT4G11160.3	1842
NaN	NaN	NaN	NaN	NaN	NaN				-1	1	1	1	11.3	11.3	11.3	15.733	0	13.573	289800	6	6	AT4G11175.1	AT4G11175.1	1843
NaN	NaN	NaN	NaN	NaN	NaN				-1	2	2	2	9.3	9.3	9.3	36.566	0	11.099	254370	20	3	AT4G11240.1	AT4G11240.1	1844
NaN	NaN	NaN	NaN	NaN	NaN				-1	1	1	1	4.7	4.7	4.7	39.762	0.00042589	9.6973	144230	18	6	AT4G11260.1	AT4G11260.1	1845
14.9441	NaN	NaN	15.2027	15.3018	15.1971				-1	6	6	6	9	9	9	114.3	0	44.822	467880	51	17	AT4G11420.1	AT4G11420.1	1846
NaN	NaN	NaN	NaN	NaN	NaN				-1	1	1	1	5.2	5.2	5.2	25.584	0	12.77	155740	12	4	AT4G11600.1	AT4G11600.1	1847
NaN	NaN	NaN	NaN	NaN	NaN				-1	1	1	1	1.9	1.9	1.9	127.96	0.00041982	8.9714	77670	61	4	AT4G11670.1;AT4G11670.4;AT4G11670.3;AT4G11670.2	AT4G11670.1;AT4G11670.4;AT4G11670.3;AT4G11670.2	1848
16.7272	16.7936	16.9478	16.9707	17.1439	17.11				-1	15	15	15	49	49	49	45.205	0	137.83	2526600	23	48	AT4G11820.3;AT4G11820.1;AT4G11820.2	AT4G11820.3;AT4G11820.1;AT4G11820.2	1849
16.5495	16.7341	16.6919	NaN	16.4165	NaN				-1	6	6	6	11.5	11.5	11.5	95.587	0	122.67	745750	43	16	AT4G11850.1;AT4G11840.2;AT4G11840.1;AT4G11830.4;AT4G11830.3;AT4G11830.1;AT4G11830.2	AT4G11850.1	1850
17.1533	17.0485	17.1223	17.2222	16.9268	17.1957				-1	6	6	6	14.7	14.7	14.7	74.427	0	217.64	1737000	30	26	AT4G11860.1	AT4G11860.1	1851
NaN	NaN	NaN	NaN	NaN	NaN				-1	2	2	2	4.8	4.8	4.8	58.658	0	14.216	90973	28	3	AT4G12300.1;AT5G44620.1	AT4G12300.1;AT5G44620.1	1852
17.2976	17.2499	17.4796	17.0103	16.8913	16.5911				-1	3	3	3	13.1	13.1	13.1	59.045	0	30.448	1214000	28	18	AT4G12310.1;AT4G12320.1	AT4G12310.1;AT4G12320.1	1853
NaN	NaN	NaN	NaN	NaN	NaN				-1	2	2	1	6.6	6.6	2.9	65.637	0	23.628	250490	30	6	AT4G12420.2;AT4G12420.1	AT4G12420.2;AT4G12420.1	1854
NaN	NaN	NaN	NaN	NaN	NaN				-1	1	1	1	8.1	8.1	8.1	27.914	0	44.74	185190	14	5	AT4G12590.1	AT4G12590.1	1855
NaN	NaN	NaN	NaN	NaN	NaN				-1	1	1	1	9.4	9.4	9.4	13.897	0	24.293	295430	7	4	AT5G20160.1;AT4G22380.1;AT4G12600.1;AT5G20160.2;AT4G12600.2	AT5G20160.1;AT4G22380.1;AT4G12600.1;AT5G20160.2;AT4G12600.2	1856
NaN	NaN	NaN	NaN	NaN	NaN				-1	1	1	1	2.8	2.8	2.8	74.139	0	13.36	243810	17	5	AT4G12650.1	AT4G12650.1	1857
NaN	NaN	NaN	NaN	NaN	NaN				-1	3	1	1	4.9	2.2	2.2	98.158	0.005306	6.1085	21155	33	1	AT4G12770.2;AT4G12770.1	AT4G12770.2;AT4G12770.1	1858
16.3288	16.4514	16.2675	16.7751	16.5815	16.7677				-1	3	3	1	5.2	5.2	2.2	86.016	0	24.503	917130	28	15	AT4G12780.6;AT4G12780.4;AT4G12780.5;AT4G12780.3;AT4G12780.2;AT4G12780.1	AT4G12780.6;AT4G12780.4;AT4G12780.5;AT4G12780.3;AT4G12780.2;AT4G12780.1	1859
16.3163	16.2605	16.2753	NaN	NaN	NaN				-1	6	6	6	38.3	38.3	38.3	34.436	0	46.663	661910	16	15	AT4G13010.1	AT4G13010.1	1860
NaN	NaN	NaN	NaN	NaN	NaN				-1	7	1	0	26.7	9.2	0	23.629	0.00041701	8.7075	492030	11	5	AT4G13170.1	AT4G13170.1	1861
17.4663	17.5753	17.6637	17.7258	17.6697	17.6351				-1	13	13	13	39.5	39.5	39.5	55.013	0	156.41	3359800	24	48	AT4G13430.1	AT4G13430.1	1862
17.7445	17.5691	17.7588	NaN	NaN	NaN				-1	8	8	8	33.7	33.7	33.7	39.816	0	111.54	1279800	19	20	AT4G13670.3;AT4G13670.1;AT4G13670.4;AT4G13670.2	AT4G13670.3;AT4G13670.1;AT4G13670.4;AT4G13670.2	1863
NaN	NaN	NaN	NaN	NaN	NaN				-1	1	1	1	4.7	4.7	4.7	45.827	0	25.422	590150	22	6	AT4G13730.2;AT4G13730.1	AT4G13730.2;AT4G13730.1	1864
16.1749	16.1732	15.7845	16.3815	16.2911	16.1703				-1	4	4	4	10.6	10.6	10.6	57.448	0	27.804	637930	25	15	AT4G13770.1	AT4G13770.1	1865
15.4151	15.0762	15.408	16.6893	16.6922	16.6001				-1	6	6	6	12.8	12.8	12.8	89.853	0	54.748	1116000	46	20	AT4G13780.1	AT4G13780.1	1866
NaN	NaN	NaN	NaN	NaN	NaN				-1	1	1	1	3.5	3.5	3.5	47.455	0.00039952	7.7573	63528	20	2	AT4G13840.1	AT4G13840.1	1867
17.1145	17.3327	17.3827	16.6347	16.6711	17.4701				-1	4	4	4	47.9	47.9	47.9	14.691	0	96.482	2005800	6	20	AT4G13850.3;AT4G13850.2;AT4G13850.1;AT4G13850.4	AT4G13850.3;AT4G13850.2;AT4G13850.1;AT4G13850.4	1868
18.0443	17.8664	18.0942	20.1304	20.0902	19.9861				-1	19	19	19	62.8	62.8	62.8	51.717	0	323.31	10547000	21	74	AT4G13930.1	AT4G13930.1	1869
19.5987	19.43	19.4876	21.6585	21.665	21.6275				-1	31	31	11	74.4	74.4	31.5	53.378	0	323.31	82154000	25	246	AT4G13940.1;AT4G13940.3;AT4G13940.2;AT4G13940.4	AT4G13940.1;AT4G13940.3;AT4G13940.2;AT4G13940.4	1870
NaN	NaN	NaN	16.7806	NaN	16.8036				-1	6	6	5	17.6	17.6	15.7	54.056	0	38.278	809620	27	12	AT4G14030.2;AT4G14030.1	AT4G14030.2;AT4G14030.1	1871
NaN	NaN	NaN	NaN	NaN	NaN				-1	4	3	3	15.2	13.3	13.3	53.937	0	23.36	152920	27	4	AT4G14040.1	AT4G14040.1	1872
16.3986	16.493	16.6605	17.3071	17.181	17.2467				-1	5	5	5	16.7	16.7	16.7	50.702	0	72.47	1619700	24	24	AT4G14090.1	AT4G14090.1	1873
NaN	NaN	NaN	NaN	NaN	NaN				-1	1	1	1	5.5	5.5	5.5	32.687	0.0014925	6.8411	37657	14	2	AT4G14130.1	AT4G14130.1	1874
17.262	17.3411	17.333	16.9203	16.4669	16.861				-1	12	12	9	32.3	32.3	25	85.277	0	151.92	2513400	30	49	AT4G14160.2;AT4G14160.1;AT4G14160.3;AT2G21630.1	AT4G14160.2;AT4G14160.1;AT4G14160.3	1875
16.7858	16.7559	16.7798	15.6631	15.8292	15.6919				-1	7	7	4	25.4	25.4	15.1	63.084	0	69.875	1292000	23	27	AT4G14350.3;AT4G14350.4;AT4G14350.2;AT4G14350.1	AT4G14350.3;AT4G14350.4;AT4G14350.2;AT4G14350.1	1876
15.0762	14.9901	NaN	NaN	NaN	15.1077				-1	2	2	1	17	17	9.3	21.365	0	21.209	437180	14	10	AT4G14710.6;AT4G14710.4;AT4G14710.2;AT4G14710.1;AT4G14710.3;AT4G14710.5	AT4G14710.6;AT4G14710.4;AT4G14710.2;AT4G14710.1;AT4G14710.3;AT4G14710.5	1877
NaN	NaN	NaN	NaN	NaN	NaN				-1	2	1	1	17.7	9.7	9.7	20.625	0.006655	6.0087	123130	13	5	AT4G14716.2;AT4G14716.1	AT4G14716.2;AT4G14716.1	1878
NaN	NaN	NaN	NaN	NaN	NaN				-1	2	2	2	9	9	9	33.805	0	17.177	260770	16	7	AT4G14880.5;AT4G14880.4;AT4G14880.3;AT4G14880.2;AT4G14880.1;AT3G22460.2;AT3G22460.1	AT4G14880.5;AT4G14880.4;AT4G14880.3;AT4G14880.2;AT4G14880.1;AT3G22460.2;AT3G22460.1	1879
NaN	NaN	NaN	NaN	NaN	NaN				-1	1	1	1	13	13	13	16.732	0	44.721	84089	10	6	AT4G14890.1	AT4G14890.1	1880
16.715	16.3915	16.7719	17.1935	17.3822	17.2197				-1	3	3	2	38.2	38.2	29.8	15.035	0	28.012	1668100	6	17	AT4G15000.2;AT4G15000.1	AT4G15000.2;AT4G15000.1	1881
NaN	NaN	NaN	NaN	NaN	NaN				-1	1	1	1	3.2	3.2	3.2	33.207	0.0086475	5.9238	84463	11	2	AT4G15030.1;AT4G15030.3;AT4G15030.2	AT4G15030.1;AT4G15030.3;AT4G15030.2	1882
NaN	NaN	NaN	NaN	NaN	NaN				-1	2	2	2	17.1	17.1	17.1	30.247	0	21.316	111700	11	6	AT4G15093.1	AT4G15093.1	1883
NaN	NaN	NaN	NaN	NaN	NaN				-1	1	1	1	3.6	3.6	3.6	65.174	0.00077012	7.1765	11104	26	2	AT4G15110.1	AT4G15110.1	1884
18.4634	NaN	17.5317	18.0805	18.261	18.1643				-1	4	3	3	19.7	15.8	15.8	33.983	0	44.573	2336700	12	14	AT4G15130.1	AT4G15130.1	1885
NaN	NaN	NaN	NaN	NaN	NaN				-1	1	1	1	6.3	6.3	6.3	24.458	0.00039635	7.601	34310	9	1	AT4G15520.1	AT4G15520.1	1886
15.6019	15.5042	15.5751	15.8343	15.8292	15.9267				-1	8	8	8	21	21	21	93.379	0	70.896	1065200	45	30	AT4G15530.7;AT4G15530.3;AT4G15530.2;AT4G15530.4;AT4G15530.1;AT4G15530.6;AT4G15530.5	AT4G15530.7;AT4G15530.3;AT4G15530.2;AT4G15530.4;AT4G15530.1;AT4G15530.6;AT4G15530.5	1887
NaN	NaN	14.0188	14.0654	NaN	NaN				-1	2	2	2	6.3	6.3	6.3	76.832	0	20.488	109780	30	6	AT4G15560.1;AT3G21500.1;AT3G21500.2;AT3G21500.3	AT4G15560.1;AT3G21500.1;AT3G21500.2;AT3G21500.3	1888
NaN	NaN	NaN	NaN	NaN	NaN				-1	1	1	1	5	5	5	46.905	0	19.18	236530	22	6	AT4G15760.1;AT4G15760.2	AT4G15760.1;AT4G15760.2	1889
NaN	NaN	NaN	NaN	NaN	NaN				-1	1	1	1	13.4	13.4	13.4	20.61	0.00039968	7.7612	170240	9	5	AT4G15770.1	AT4G15770.1	1890
NaN	NaN	NaN	NaN	NaN	NaN				-1	1	1	1	9.5	9.5	9.5	16.53	0.00039809	7.6699	48418	10	2	AT4G15790.1;AT4G15790.2	AT4G15790.1;AT4G15790.2	1891
NaN	NaN	NaN	16.4009	16.3179	16.5366				-1	4	4	4	41.9	41.9	41.9	9.3472	0	51.318	603590	6	9	AT4G15802.1	AT4G15802.1	1892
NaN	NaN	NaN	NaN	14.5218	14.7879				-1	5	5	5	18.5	18.5	18.5	54.009	0	33.398	269340	26	12	AT4G15900.1;AT3G16650.1	AT4G15900.1	1893
16.3846	16.2196	16.4196	17.0117	17.1254	17.0615				-1	4	4	4	48.8	48.8	48.8	13.792	0	80.49	1211400	6	17	AT4G15930.1;AT4G15930.2	AT4G15930.1;AT4G15930.2	1894
NaN	NaN	NaN	14.3918	14.4143	14.2707				-1	3	3	3	4.6	4.6	4.6	114.26	0	41.122	180720	48	9	AT4G16130.1	AT4G16130.1	1895
17.8007	18.0384	17.9362	17.3753	17.4748	17.3695				-1	11	11	7	29.5	29.5	19.8	58.906	0	103.97	3600300	25	41	AT4G16143.2;AT4G16143.1	AT4G16143.2;AT4G16143.1	1896
15.9073	15.9539	16.0331	15.2622	NaN	15.4449				-1	3	3	3	22.6	22.6	22.6	28.818	0	20.654	471650	18	13	AT4G16210.1	AT4G16210.1	1897
NaN	NaN	NaN	15.6142	15.5851	15.6141				-1	6	6	6	5.3	5.3	5.3	206.83	0	69.462	423120	94	13	AT4G16340.2;AT4G16340.1	AT4G16340.2;AT4G16340.1	1898
NaN	NaN	NaN	NaN	NaN	NaN				-1	4	4	4	6	6	6	89.354	0	26.75	85879	40	5	AT4G16630.1	AT4G16630.1	1899
19.5257	19.4475	19.6654	19.9966	20.1033	20.0925				-1	4	4	4	25.5	25.5	25.5	24.239	0	292.06	12982000	9	25	AT4G17390.1;AT4G16720.1	AT4G17390.1;AT4G16720.1	1900
14.3365	14.6107	14.8424	14.5036	14.5692	14.6725				-1	6	6	6	17.8	17.8	17.8	72.921	0	46.462	398210	41	19	AT4G16760.2;AT4G16760.1	AT4G16760.2;AT4G16760.1	1901
NaN	NaN	NaN	NaN	NaN	NaN				-1	1	1	1	4.3	4.3	4.3	33.44	0	15.447	77269	16	3	AT4G17040.1	AT4G17040.1	1902
NaN	NaN	NaN	NaN	NaN	NaN				-1	2	2	2	5.1	5.1	5.1	61.352	0	15.709	87038	34	3	AT4G17090.1	AT4G17090.1	1903
16.1877	16.2065	16.4791	15.8102	15.8365	15.6626				-1	11	11	11	4.4	4.4	4.4	471.22	0	138.27	1129200	202	33	AT4G17140.3;AT4G17140.1;AT4G17140.2	AT4G17140.3;AT4G17140.1;AT4G17140.2	1904
NaN	NaN	NaN	NaN	NaN	NaN				-1	1	1	1	8.5	8.5	8.5	17.936	0.00041169	8.3548	63058	11	2	AT4G35860.2;AT4G35860.1;AT4G17170.1	AT4G35860.2;AT4G35860.1;AT4G17170.1	1905
NaN	NaN	NaN	NaN	NaN	NaN				-1	2	1	1	10.6	6.7	6.7	38.905	0	16.238	381110	18	6	AT4G17520.1	AT4G17520.1	1906
16.8282	NaN	NaN	17.0577	16.8523	16.9654				-1	5	1	1	38.6	8.4	8.4	22.318	0.0004223	9.1768	769550	16	10	AT4G17530.1	AT4G17530.1	1907
NaN	NaN	NaN	NaN	NaN	NaN				-1	2	2	2	6.7	6.7	6.7	59.618	0	15.764	33074	21	2	AT4G17620.3;AT4G17620.2;AT4G17620.1	AT4G17620.3;AT4G17620.2;AT4G17620.1	1908
NaN	NaN	16.9455	NaN	NaN	15.2093				-1	5	5	5	30.7	30.7	30.7	33.547	0	72.531	640310	18	13	AT4G17720.1;AT5G46870.2;AT5G46870.1	AT4G17720.1	1909
NaN	NaN	NaN	NaN	NaN	NaN				-1	2	2	2	12.3	12.3	12.3	48.217	0	12.191	186740	23	5	AT4G17830.1;AT4G17830.2	AT4G17830.1;AT4G17830.2	1910
15.6331	16.0181	16.1906	16.1596	16.3297	16.3967				-1	6	6	6	26.6	26.6	26.6	44.441	0	91.575	1201800	22	27	AT4G17890.1;AT4G17890.2	AT4G17890.1;AT4G17890.2	1911
NaN	14.6191	NaN	NaN	NaN	14.4732				-1	3	3	3	7.4	7.4	7.4	70.337	0	30.508	200700	37	9	AT4G18030.1	AT4G18030.1	1912
17.9555	17.8875	18.1265	17.6605	17.7136	17.7583				-1	15	15	15	61.5	61.5	61.5	39.533	0	288.67	4543800	23	57	AT4G18060.1	AT4G18060.1	1913
20.0141	20.0697	20.1347	19.9005	19.8943	19.7162				-1	9	9	3	49.6	49.6	23.3	15.503	0	212.2	17126000	6	79	AT4G18100.1	AT4G18100.1	1914
NaN	NaN	NaN	NaN	NaN	NaN				-1	1	1	1	2	2	2	117.75	0	14.711	148840	49	6	AT4G18240.1	AT4G18240.1	1915
17.3286	17.1888	17.2022	17.1263	17.0282	17.2358				-1	12	12	8	38.4	38.4	23.1	46.269	0	143.69	4307700	21	61	AT4G18480.1	AT4G18480.1	1916
NaN	NaN	NaN	NaN	NaN	NaN				-1	1	1	1	2.4	2.4	2.4	121.79	0.0086535	5.9251	46539	50	3	AT4G18820.1	AT4G18820.1	1917
15.7547	15.799	NaN	15.7713	NaN	NaN				-1	6	6	6	20.8	20.8	20.8	50.113	0	67.638	532850	30	13	AT4G18950.2;AT4G18950.1	AT4G18950.2;AT4G18950.1	1918
NaN	NaN	NaN	NaN	NaN	NaN				-1	1	1	1	8.6	8.6	8.6	25.524	0.0039441	6.2638	12950	11	1	AT4G19150.1	AT4G19150.1	1919
NaN	NaN	NaN	NaN	NaN	NaN				-1	1	1	1	2.9	2.9	2.9	69.146	0.0011516	7.147	11007	29	1	AT4G19190.1	AT4G19190.1	1920
17.1666	17.1189	16.9624	17.8313	17.4914	17.5789				-1	9	9	9	28.4	28.4	28.4	68.389	0	137.39	2506100	29	33	AT4G19210.1	AT4G19210.1	1921
16.3387	16.6517	16.6352	15.9651	16.012	16.1942				-1	4	4	4	19.7	19.7	19.7	42.125	0	45.321	955660	21	19	AT4G19410.1;AT4G19410.2	AT4G19410.1;AT4G19410.2	1922
NaN	NaN	NaN	14.3577	NaN	14.1455				-1	3	3	3	5.2	5.2	5.2	113.86	0	24.386	121570	55	7	AT4G19490.2;AT4G19490.1	AT4G19490.2;AT4G19490.1	1923
NaN	NaN	NaN	NaN	NaN	NaN				-1	3	3	3	6.7	6.7	6.7	91.563	0	19.216	139500	46	4	AT4G19610.1	AT4G19610.1	1924
NaN	NaN	NaN	NaN	NaN	NaN				-1	1	1	1	4.5	4.5	4.5	35.569	0	35.756	253790	18	4	AT4G19880.3;AT4G19880.1;AT4G19880.2	AT4G19880.3;AT4G19880.1;AT4G19880.2	1925
20.3445	20.2235	20.2205	18.932	18.9592	18.9538				-1	8	8	8	40.9	40.9	40.9	24.584	0	233.66	15046000	14	43	AT4G20260.9;AT4G20260.8;AT4G20260.7;AT4G20260.3;AT4G20260.2;AT4G20260.10;AT4G20260.1;AT4G20260.4;AT4G20260.5;AT4G20260.6	AT4G20260.9;AT4G20260.8;AT4G20260.7;AT4G20260.3;AT4G20260.2;AT4G20260.10;AT4G20260.1;AT4G20260.4;AT4G20260.5;AT4G20260.6	1926
19.7885	19.4917	19.6704	19.6352	19.5363	19.438				-1	21	21	20	60.5	60.5	60.5	51.63	0	323.31	25569000	25	149	AT4G20360.2;AT4G20360.1	AT4G20360.2;AT4G20360.1	1927
NaN	NaN	NaN	NaN	NaN	NaN				-1	1	1	1	3.8	3.8	3.8	32.36	0.0056477	6.0929	31027	18	2	AT4G20410.1;AT4G20410.2	AT4G20410.1;AT4G20410.2	1928
17.4539	17.4185	17.6412	16.7751	17.0522	16.9211				-1	34	34	34	39.1	39.1	39.1	152.37	0	323.31	9617900	69	157	AT4G20850.1	AT4G20850.1	1929
NaN	NaN	NaN	NaN	NaN	NaN				-1	1	1	1	1.7	1.7	1.7	112.04	0.00040388	7.9086	42617	42	2	AT4G20940.1	AT4G20940.1	1930
NaN	NaN	NaN	NaN	NaN	NaN				-1	2	2	2	5.4	5.4	5.4	66.724	0	12.184	148870	21	2	AT4G20980.4;AT4G20980.3;AT4G20980.2;AT4G20980.1;AT5G44320.1	AT4G20980.4;AT4G20980.3;AT4G20980.2;AT4G20980.1;AT5G44320.1	1931
NaN	NaN	NaN	NaN	NaN	NaN				-1	1	1	1	2	2	2	121.18	0.00039339	7.4315	11959	49	1	AT4G21100.1	AT4G21100.1	1932
NaN	NaN	NaN	NaN	NaN	NaN				-1	2	2	2	24.8	24.8	24.8	17.187	0	19.478	129970	7	3	AT4G21110.2;AT4G21110.1	AT4G21110.2;AT4G21110.1	1933
15.1976	14.743	14.9129	NaN	15.1058	15.211				-1	6	6	6	19	19	19	73.397	0	57.628	413340	40	17	AT4G21150.2;AT4G21150.3;AT4G21150.1	AT4G21150.2;AT4G21150.3;AT4G21150.1	1934
NaN	NaN	NaN	NaN	NaN	NaN				-1	1	1	1	4.2	4.2	4.2	37.145	0	13.569	144610	15	6	AT4G21160.4;AT4G21160.3;AT4G21160.2;AT4G21160.1	AT4G21160.4;AT4G21160.3;AT4G21160.2;AT4G21160.1	1935
NaN	NaN	NaN	16.272	16.0438	16.3169				-1	5	5	5	16.7	16.7	16.7	65.732	0	56.308	604130	30	13	AT4G21180.2;AT4G21180.1	AT4G21180.2;AT4G21180.1	1936
17.1493	17.5686	17.2625	16.8105	16.6558	16.4973				-1	7	7	7	39	39	39	23.795	0	84.166	2805700	11	32	AT4G21280.1;AT4G21280.2	AT4G21280.1;AT4G21280.2	1937
18.104	18.3452	18.1017	17.3706	17.118	17.2796				-1	4	4	4	20.4	20.4	20.4	35.187	0	53.444	2292100	15	23	AT4G21450.3;AT4G21450.1;AT4G21450.2	AT4G21450.3;AT4G21450.1;AT4G21450.2	1938
NaN	NaN	NaN	NaN	NaN	NaN				-1	1	1	1	5	5	5	42.11	0.0011316	6.9311	120900	21	3	AT4G21470.1	AT4G21470.1	1939
NaN	NaN	NaN	NaN	NaN	NaN				-1	2	2	2	10.2	10.2	10.2	30.222	0	15.154	201610	18	5	AT4G21540.2;AT4G21540.1	AT4G21540.2;AT4G21540.1	1940
NaN	NaN	NaN	NaN	NaN	NaN				-1	1	1	1	6.2	6.2	6.2	23.494	0	13.354	127160	11	5	AT4G21560.3;AT4G21560.2;AT4G21560.1	AT4G21560.3;AT4G21560.2;AT4G21560.1	1941
NaN	NaN	NaN	NaN	NaN	NaN				-1	1	1	1	16.3	16.3	16.3	10.048	0	18.608	224440	3	5	AT4G21620.2;AT4G21620.1	AT4G21620.2;AT4G21620.1	1942
NaN	NaN	15.0655	NaN	NaN	15.0249				-1	2	2	2	7.2	7.2	7.2	66.833	0	28.096	219340	19	8	AT4G21660.1;AT4G21660.2;AT4G21660.3	AT4G21660.1;AT4G21660.2;AT4G21660.3	1943
NaN	14.542	NaN	NaN	15.3203	15.4023				-1	2	2	2	2.9	2.9	2.9	135.02	0	21.353	237750	61	9	AT4G21710.1	AT4G21710.1	1944
NaN	NaN	NaN	NaN	NaN	NaN				-1	1	1	1	4.5	4.5	4.5	21.968	0.0014937	6.8423	70108	14	2	AT4G21860.4;AT4G21860.3;AT4G21860.1	AT4G21860.4;AT4G21860.3;AT4G21860.1	1945
15.2712	15.3306	15.227	14.9674	14.7446	NaN				-1	1	1	1	14.6	14.6	14.6	15.455	0.00040552	7.9974	376660	6	11	AT4G22000.1	AT4G22000.1	1946
NaN	NaN	NaN	NaN	NaN	NaN				-1	3	3	3	5.1	5.1	5.1	87.893	0	16.986	271070	40	5	AT4G22120.6;AT4G22120.5;AT4G22120.4;AT4G22120.3;AT4G22120.2;AT4G22120.1	AT4G22120.6;AT4G22120.5;AT4G22120.4;AT4G22120.3;AT4G22120.2;AT4G22120.1	1947
NaN	NaN	NaN	NaN	NaN	NaN				-1	2	2	2	9.3	9.3	9.3	61.183	0	14.352	76034	23	4	AT4G22130.2;AT4G22130.1	AT4G22130.2;AT4G22130.1	1948
15.3351	NaN	NaN	15.4155	15.6548	15.7038				-1	5	5	5	16.6	16.6	16.6	46.621	0	34.282	504000	18	15	AT4G22670.1	AT4G22670.1	1949
15.6909	15.7049	15.7529	16.1441	16.0348	15.9664				-1	7	7	7	20	20	20	59.425	0	82.145	1089700	28	27	AT4G22710.1;AT4G22690.1	AT4G22710.1;AT4G22690.1	1950
NaN	NaN	NaN	15.6217	15.7044	15.6251				-1	2	2	2	13.2	13.2	13.2	40.396	0	28.548	306820	19	8	AT4G22880.3;AT4G22880.2;AT4G22880.1	AT4G22880.3;AT4G22880.2;AT4G22880.1	1951
14.0031	15.2334	NaN	NaN	NaN	15.4086				-1	4	4	4	14	14	14	53.48	0	34.683	272570	22	11	AT4G23100.2;AT4G23100.3;AT4G23100.1	AT4G23100.2;AT4G23100.3;AT4G23100.1	1952
NaN	NaN	NaN	NaN	NaN	NaN				-1	2	2	2	4.5	4.5	4.5	74.282	0	60.344	341250	38	8	AT4G23180.1	AT4G23180.1	1953
14.9339	15.1001	14.8415	NaN	13.9404	NaN				-1	2	2	2	5	5	5	76.353	0	21.891	230480	41	10	AT4G23250.1;AT4G23250.3;AT4G23250.2	AT4G23250.1;AT4G23250.3;AT4G23250.2	1954
NaN	NaN	NaN	NaN	NaN	NaN				-1	1	1	1	3.8	3.8	3.8	44.292	0.0059901	6.0688	1126800	20	5	AT4G23380.1	AT4G23380.1	1955
NaN	NaN	NaN	NaN	NaN	NaN				-1	2	2	2	10.6	10.6	10.6	34.489	0	31.819	148990	15	4	AT4G23430.1;AT4G23430.2;AT4G23420.4;AT4G23420.5;AT4G23430.3;AT4G23430.4;AT4G23420.2;AT4G23420.1;AT4G23420.3	AT4G23430.1;AT4G23430.2;AT4G23420.4;AT4G23420.5;AT4G23430.3;AT4G23430.4;AT4G23420.2;AT4G23420.1;AT4G23420.3	1956
NaN	NaN	NaN	14.9609	14.8457	14.9483				-1	3	3	3	6.3	6.3	6.3	99.096	0	68.811	222320	44	9	AT4G23460.1;AT4G11380.1;AT4G11380.2;AT4G23460.2	AT4G23460.1;AT4G11380.1;AT4G11380.2	1957
NaN	NaN	NaN	NaN	NaN	NaN				-1	1	1	1	1.3	1.3	1.3	123.48	0.0011287	6.9009	22385	57	1	AT4G23540.1	AT4G23540.1	1958
16.3356	16.3522	NaN	16.8852	16.8297	16.8764				-1	3	3	3	15.3	15.3	15.3	30.528	0	21.298	940240	8	15	AT4G23630.1;AT4G23630.2;AT4G11220.1	AT4G23630.1;AT4G23630.2	1959
18.8662	18.7367	18.7356	18.8842	18.8052	18.7877				-1	28	28	28	61.1	61.1	61.1	59.336	0	323.31	14263000	25	142	AT4G23650.1	AT4G23650.1	1960
18.7699	18.8478	18.6664	19.7529	19.7389	19.9809				-1	10	10	9	70.9	70.9	58.9	17.518	0	205.97	10547000	9	56	AT4G23670.1;AT4G14060.1	AT4G23670.1	1961
17.8014	NaN	17.7505	18.3213	18.1418	18.3326				-1	8	7	7	53	41.1	41.1	17.473	0	82.52	3088100	9	25	AT4G23680.1;AT2G01520.1;AT2G01530.1	AT4G23680.1	1962
16.5966	16.8598	NaN	15.9518	16.2715	16.1292				-1	2	2	2	18.7	18.7	18.7	21.412	0	19.121	654100	8	11	AT4G23690.1	AT4G23690.1	1963
NaN	NaN	NaN	NaN	14.6496	15.0688				-1	6	6	6	65.1	65.1	65.1	11.742	0	111.5	353060	8	11	AT4G23710.1	AT4G23710.1	1964
17.8392	17.675	17.8165	16.7137	16.6693	16.6826				-1	19	19	19	35.7	35.7	35.7	74.507	0	288.86	5983700	30	77	AT4G23850.1	AT4G23850.1	1965
NaN	NaN	NaN	14.8207	14.8733	14.9144				-1	4	4	3	12.9	12.9	9.7	38.382	0	30.415	241910	15	9	AT4G23920.1;AT1G12780.1	AT4G23920.1;AT1G12780.1	1966
16.8122	16.7945	16.6971	15.8059	15.9075	15.936				-1	6	6	6	11.6	11.6	11.6	76.666	0	66.755	1208900	39	22	AT4G24100.2;AT4G24100.3;AT4G24100.1;AT4G24100.4	AT4G24100.2;AT4G24100.3;AT4G24100.1;AT4G24100.4	1967
16.5355	16.8456	16.793	NaN	NaN	NaN				-1	3	3	3	4.6	4.6	4.6	94.148	0	23.701	616050	42	9	AT4G24190.2;AT4G24190.1	AT4G24190.2;AT4G24190.1	1968
NaN	NaN	NaN	14.9364	15.0582	15.0331				-1	3	3	3	11.6	11.6	11.6	44.102	0	57.58	307200	21	11	AT4G24220.2;AT4G24220.1	AT4G24220.2;AT4G24220.1	1969
17.9771	18.0213	18.1063	17.9407	17.9617	17.9888				-1	18	18	9	32.6	32.6	14.3	76.507	0	193.15	5558200	38	75	AT4G24280.1	AT4G24280.1	1970
NaN	NaN	NaN	NaN	NaN	NaN				-1	2	2	2	5.3	5.3	5.3	67.933	0	23.187	232260	24	7	AT4G24290.3;AT4G24290.2;AT4G24290.1;AT1G28380.1	AT4G24290.3;AT4G24290.2;AT4G24290.1;AT1G28380.1	1971
NaN	NaN	NaN	NaN	NaN	NaN				-1	1	1	1	3.8	3.8	3.8	53.947	0.00040016	7.7741	146130	20	4	AT4G24330.1	AT4G24330.1	1972
NaN	NaN	NaN	NaN	NaN	NaN				-1	2	2	2	7.7	7.7	7.7	47.064	0	25.014	140550	18	5	AT4G24400.2;AT4G24400.1	AT4G24400.2;AT4G24400.1	1973
NaN	NaN	NaN	NaN	NaN	NaN				-1	1	1	1	2.5	2.5	2.5	76.908	0	11.097	208210	32	3	AT4G24490.2;AT4G24490.1	AT4G24490.2;AT4G24490.1	1974
NaN	NaN	NaN	NaN	NaN	NaN				-1	2	2	2	8.3	8.3	8.3	47.237	0	12.744	54648	25	3	AT4G24510.1	AT4G24510.1	1975
NaN	NaN	NaN	17.1895	16.9994	17.0223				-1	7	7	7	13.8	13.8	13.8	76.324	0	62.357	982310	38	16	AT4G24520.2;AT4G24520.1	AT4G24520.2;AT4G24520.1	1976
NaN	NaN	NaN	NaN	NaN	NaN				-1	1	1	1	5.3	5.3	5.3	42.879	0.0049681	6.1539	16325	23	1	AT4G24550.1;AT4G24550.3;AT4G24550.2	AT4G24550.1;AT4G24550.3;AT4G24550.2	1977
NaN	NaN	NaN	NaN	NaN	NaN				-1	2	2	2	2.2	2.2	2.2	151.21	0	14.48	68713	79	3	AT4G24680.4;AT4G24680.5;AT4G24680.3;AT4G24680.2;AT4G24680.1	AT4G24680.4;AT4G24680.5;AT4G24680.3;AT4G24680.2;AT4G24680.1	1978
NaN	NaN	NaN	NaN	NaN	NaN				-1	1	1	1	2.4	2.4	2.4	76.185	0.0007773	7.2789	25330	28	1	AT4G24690.1	AT4G24690.1	1979
NaN	NaN	NaN	NaN	NaN	NaN				-1	1	1	1	7.2	7.2	7.2	32.113	0.0011359	6.9751	128830	11	5	AT4G24750.1	AT4G24750.1	1980
NaN	NaN	NaN	NaN	NaN	NaN				-1	1	1	1	7.3	7.3	7.3	35.787	0.0032421	6.3401	96111	11	3	AT4G24770.2;AT4G24770.1	AT4G24770.2;AT4G24770.1	1981
17.4653	17.2654	17.4469	19.3858	19.3349	19.3184				-1	27	27	27	60.4	60.4	60.4	77.435	0	323.31	21627000	33	143	AT4G24800.4;AT4G24800.3;AT4G24800.2;AT4G24800.1	AT4G24800.4;AT4G24800.3;AT4G24800.2;AT4G24800.1	1982
18.2083	18.0094	18.1507	16.7361	16.6653	16.7301				-1	11	11	11	29.5	29.5	29.5	44.282	0	323.31	3861300	20	51	AT4G24820.2;AT4G24820.1	AT4G24820.2;AT4G24820.1	1983
NaN	NaN	NaN	14.038	14.2937	14.2009				-1	3	3	3	6.2	6.2	6.2	84.618	0	34.609	121510	46	7	AT4G24840.1	AT4G24840.1	1984
18.3401	18.2516	18.1921	18.342	18.3067	18.3405				-1	2	2	2	29	29	29	7.7372	0	74.738	3149800	3	26	AT5G50460.1;AT4G24920.1	AT5G50460.1;AT4G24920.1	1985
NaN	NaN	NaN	NaN	NaN	NaN				-1	1	1	1	3	3	3	79.572	0.0066318	5.9935	4613600	35	4	AT4G24970.1	AT4G24970.1	1986
NaN	NaN	NaN	NaN	NaN	NaN				-1	1	1	1	1.4	1.4	1.4	95.599	0	14.345	255670	42	4	AT4G25090.2;AT4G25090.1	AT4G25090.2;AT4G25090.1	1987
NaN	NaN	NaN	NaN	NaN	NaN				-1	1	1	1	13.2	13.2	13.2	23.791	0	11.18	78447	9	4	AT4G25100.5;AT4G25100.3;AT4G25100.2;AT4G25100.1	AT4G25100.5;AT4G25100.3;AT4G25100.2;AT4G25100.1	1988
16.6614	16.3874	16.1019	NaN	15.6647	15.7235				-1	5	5	5	32.9	32.9	32.9	28.644	0	92.427	863850	12	17	AT4G25130.1	AT4G25130.1	1989
19.9765	21.7861	19.7286	NaN	NaN	NaN				-1	5	5	5	26.6	26.6	26.6	18.569	0	291.85	12952000	5	29	AT4G25140.1	AT4G25140.1	1990
16.1202	NaN	16.1199	NaN	NaN	NaN				-1	1	1	1	4.3	4.3	4.3	48.978	0.00041271	8.4024	411720	21	8	AT4G25340.2;AT4G25340.1	AT4G25340.2;AT4G25340.1	1991
NaN	NaN	NaN	NaN	NaN	NaN				-1	1	1	1	9.5	9.5	9.5	22.829	0.0003937	7.4338	70265	11	2	AT4G25550.1	AT4G25550.1	1992
17.4767	17.5716	17.5638	17.5069	17.5612	17.5703				-1	10	10	3	35.9	35.9	13.8	33.653	0	196.86	4857100	18	57	AT4G25630.1	AT4G25630.1	1993
NaN	NaN	NaN	NaN	NaN	NaN				-1	3	3	3	2.9	2.9	2.9	92.266	0	51.28	339390	31	5	AT4G25730.1	AT4G25730.1	1994
NaN	NaN	NaN	NaN	NaN	NaN				-1	2	2	2	16.2	16.2	16.2	19.551	0	28.055	319790	9	7	AT5G52650.1;AT4G25740.1;AT4G25740.2	AT5G52650.1;AT4G25740.1;AT4G25740.2	1995
15.4415	15.2491	15.1323	NaN	NaN	NaN				-1	5	5	5	23.9	23.9	23.9	46.762	0	44.383	333720	25	13	AT4G25770.1;AT4G25770.2	AT4G25770.1;AT4G25770.2	1996
NaN	NaN	NaN	NaN	NaN	NaN				-1	1	1	1	2.4	2.4	2.4	57.615	0.00040634	8.0555	51163	22	2	AT4G25835.1	AT4G25835.1	1997
16.4886	16.5232	16.5422	15.876	15.7924	15.8764				-1	7	7	7	10.8	10.8	10.8	139.91	0	107.18	1267800	57	26	AT4G25960.1;AT1G10680.2;AT1G10680.1	AT4G25960.1	1998
16.29	NaN	16.5791	NaN	NaN	NaN				-1	3	3	3	12.9	12.9	12.9	33.805	0	24.802	469350	17	7	AT4G26010.1;AT4G26010.2	AT4G26010.1;AT4G26010.2	1999
NaN	NaN	NaN	NaN	NaN	NaN				-1	2	2	2	7.3	7.3	7.3	50.946	0	18.03	241560	28	7	AT4G26100.1;AT4G08800.1;AT2G19470.1;AT1G72710.1	AT4G26100.1;AT4G08800.1;AT2G19470.1;AT1G72710.1	2000
NaN	NaN	NaN	17.2395	16.9419	NaN				-1	4	4	3	13.4	13.4	10.3	41.607	0	29.392	770870	16	10	AT4G26110.2;AT4G26110.1	AT4G26110.2;AT4G26110.1	2001
15.9646	16.3866	16.5034	15.6867	15.5686	15.7257				-1	2	2	2	10.1	10.1	10.1	32.755	0	41.194	678660	10	17	AT4G26130.1	AT4G26130.1	2002
[truncated: 884 more rows]

## Sheet: only detected in CC1
Proteins only detected in samples from PafA-CC1
LFQ intensity Lti6B_rep1	LFQ intensity Lti6B_rep2	LFQ intensity Lti6B_rep3	LFQ intensity CC1_rep1	LFQ intensity CC1_rep2	LFQ intensity CC1_rep3	Count
			+	+	+	151
Protein IDs	Majority protein IDs	id
AT1G01950.1;AT1G01950.2;AT1G01950.3;AT1G01950.4	AT1G01950.1;AT1G01950.2;AT1G01950.3;AT1G01950.4	10
AT1G05500.1;AT1G05500.2	AT1G05500.1;AT1G05500.2	61
AT1G05680.1;AT1G05675.1	AT1G05680.1	63
AT1G07110.1	AT1G07110.1	81
AT1G08200.1	AT1G08200.1	99
AT1G08420.2;AT1G08420.1	AT1G08420.2;AT1G08420.1	103
AT1G10350.1	AT1G10350.1	128
AT1G10430.2;AT1G10430.1	AT1G10430.2;AT1G10430.1	129
AT1G14610.1	AT1G14610.1	174
AT1G14840.1;AT1G14840.2	AT1G14840.1;AT1G14840.2	178
AT1G19835.6;AT1G19835.5;AT1G19835.4;AT1G19835.3;AT1G19835.2;AT1G19835.1	AT1G19835.6;AT1G19835.5;AT1G19835.4;AT1G19835.3;AT1G19835.2;AT1G19835.1	226
AT1G21630.3;AT1G21630.1;AT1G21630.4;AT1G21630.2	AT1G21630.3;AT1G21630.1;AT1G21630.4;AT1G21630.2	250
AT1G23820.1;AT1G23820.2	AT1G23820.1;AT1G23820.2	271
AT1G24764.1;AT1G24764.3	AT1G24764.1;AT1G24764.3	280
AT1G29250.1	AT1G29250.1	308
AT1G30530.1	AT1G30530.1	323
AT1G31070.1;AT1G31070.2;AT2G35020.1	AT1G31070.1;AT1G31070.2	328
AT1G35220.3;AT1G35220.2;AT1G35220.1;AT1G35220.7;AT1G35220.4;AT1G35220.6;AT1G35220.5	AT1G35220.3;AT1G35220.2;AT1G35220.1;AT1G35220.7;AT1G35220.4;AT1G35220.6;AT1G35220.5	355
AT1G41880.1;AT1G41880.2;AT1G07070.1	AT1G41880.1;AT1G41880.2	364
AT1G45688.1;AT1G45688.2	AT1G45688.1	382
AT1G47128.1	AT1G47128.1	383
AT1G47900.2;AT1G47900.3;AT1G47900.1	AT1G47900.2;AT1G47900.3;AT1G47900.1	388
AT1G48420.3;AT1G48420.2;AT1G48420.1	AT1G48420.3;AT1G48420.2;AT1G48420.1	393
AT1G49760.2;AT1G49760.1	AT1G49760.2;AT1G49760.1	409
AT1G50710.1	AT1G50710.1	421
AT1G51570.1;AT3G57880.4;AT3G57880.3;AT3G57880.2;AT3G57880.1	AT1G51570.1;AT3G57880.4;AT3G57880.3;AT3G57880.2;AT3G57880.1	428
AT1G53165.1;AT1G53165.2;AT1G53165.3	AT1G53165.1;AT1G53165.2;AT1G53165.3	451
AT1G54100.2;AT1G54100.1	AT1G54100.2;AT1G54100.1	467
AT1G59830.1;AT1G59830.2	AT1G59830.1;AT1G59830.2	499
AT1G60070.1;AT1G60070.2	AT1G60070.1;AT1G60070.2	504
AT1G60850.3;AT1G60850.4;AT1G60850.2;AT1G60850.1	AT1G60850.3;AT1G60850.4;AT1G60850.2;AT1G60850.1	512
AT1G64440.1	AT1G64440.1	550
AT1G64900.1	AT1G64900.1	556
AT1G64950.1;AT5G61320.1;AT1G64940.1;AT2G12190.1	AT1G64950.1;AT5G61320.1;AT1G64940.1;AT2G12190.1	557
AT1G66840.2;AT1G66840.1	AT1G66840.2;AT1G66840.1	575
AT1G67230.1	AT1G67230.1	579
AT1G67680.1;AT1G67650.1	AT1G67680.1	583
AT1G67930.1	AT1G67930.1	586
AT1G68790.1	AT1G68790.1	595
AT1G68910.3;AT1G68910.2;AT1G68910.1	AT1G68910.3;AT1G68910.2;AT1G68910.1	596
AT1G74690.1	AT1G74690.1	660
AT1G77460.4;AT1G77460.3;AT1G77460.2;AT1G77460.1	AT1G77460.4;AT1G77460.3;AT1G77460.2;AT1G77460.1	693
AT1G78880.1	AT1G78880.1	708
AT1G79990.2;AT1G79990.1	AT1G79990.2;AT1G79990.1	725
AT2G01470.1	AT2G01470.1	743
AT2G03760.1	AT2G03760.1	758
AT2G17420.2;AT2G17420.1	AT2G17420.2;AT2G17420.1	805
AT2G19570.1	AT2G19570.1	826
AT2G20190.1	AT2G20190.1	838
AT2G20420.1	AT2G20420.1	842
AT2G20850.1;AT2G20850.2	AT2G20850.1	851
AT2G21410.1	AT2G21410.1	861
AT2G25450.1	AT2G25450.1	899
AT2G29540.1;AT2G29540.2;AT2G29540.3	AT2G29540.1;AT2G29540.2;AT2G29540.3	937
AT2G29980.1	AT2G29980.1	942
AT2G31660.1	AT2G31660.1	959
AT2G31750.1;AT2G31750.2	AT2G31750.1;AT2G31750.2	962
AT2G32240.1	AT2G32240.1	970
AT2G32900.1	AT2G32900.1	976
AT2G34680.1;AT2G34680.2	AT2G34680.1;AT2G34680.2	997
AT2G36360.2;AT2G36360.1;AT2G36360.3;AT2G36360.5;AT2G36360.4	AT2G36360.2;AT2G36360.1;AT2G36360.3;AT2G36360.5;AT2G36360.4	1005
AT2G37080.3;AT2G37080.2;AT2G37080.1	AT2G37080.3;AT2G37080.2;AT2G37080.1	1019
AT2G41790.1	AT2G41790.1	1079
AT2G42600.3;AT2G42600.2;AT2G42600.1	AT2G42600.3;AT2G42600.2;AT2G42600.1	1087
AT2G44160.1	AT2G44160.1	1114
AT2G47970.2;AT2G47970.1	AT2G47970.2;AT2G47970.1	1153
AT3G01340.2;AT3G01340.1	AT3G01340.2;AT3G01340.1	1159
AT3G02760.2;AT3G02760.1	AT3G02760.2;AT3G02760.1	1183
AT3G02870.1;AT3G02870.3;AT3G02870.2	AT3G02870.1;AT3G02870.3;AT3G02870.2	1186
AT3G02930.2;AT3G02930.3;AT3G02930.1	AT3G02930.2;AT3G02930.3;AT3G02930.1	1188
AT3G04120.1	AT3G04120.1	1199
AT3G05710.2;AT3G05710.1;AT4G02195.1	AT3G05710.2;AT3G05710.1	1223
AT3G07300.1;AT3G07300.2;AT3G07300.3	AT3G07300.1;AT3G07300.2;AT3G07300.3	1250
AT3G08947.1;AT3G08947.2	AT3G08947.1;AT3G08947.2	1266
AT3G10520.1	AT3G10520.1	1284
AT3G12270.1	AT3G12270.1	1308
AT3G12780.1	AT3G12780.1	1318
AT3G17850.1	AT3G17850.1	1376
AT3G18060.1;AT2G01330.1	AT3G18060.1	1381
AT3G27050.1	AT3G27050.1	1492
AT3G27300.3;AT3G27300.2;AT3G27300.1;AT3G27300.5;AT3G27300.4	AT3G27300.3;AT3G27300.2;AT3G27300.1;AT3G27300.5;AT3G27300.4	1498
AT3G27530.1	AT3G27530.1	1502
AT3G28300.1;AT3G28290.1	AT3G28300.1;AT3G28290.1	1508
AT3G28715.1	AT3G28715.1	1511
AT3G33530.4;AT3G33530.1;AT3G33530.2;AT3G33530.3;AT3G33530.5	AT3G33530.4;AT3G33530.1;AT3G33530.2;AT3G33530.3;AT3G33530.5	1523
AT3G44590.2;AT3G44590.1	AT3G44590.2;AT3G44590.1	1533
AT3G45850.2;AT3G45850.1	AT3G45850.2;AT3G45850.1	1545
AT3G46220.4;AT3G46220.3;AT3G46220.1;AT3G46220.2	AT3G46220.4;AT3G46220.3;AT3G46220.1;AT3G46220.2	1550
AT3G48720.1;AT5G63560.1	AT3G48720.1	1571
AT3G50590.2;AT3G50590.1	AT3G50590.2;AT3G50590.1	1593
AT3G52880.1;AT3G52880.2	AT3G52880.1;AT3G52880.2	1624
AT3G66658.1;AT3G66658.2	AT3G66658.1;AT3G66658.2	1755
AT4G00620.1	AT4G00620.1	1760
AT4G00810.2;AT4G00810.1	AT4G00810.2;AT4G00810.1	1764
AT4G02030.1;AT4G02030.2	AT4G02030.1;AT4G02030.2	1777
AT4G04640.1	AT4G04640.1	1802
AT4G09670.1	AT4G09670.1	1823
AT4G15802.1	AT4G15802.1	1892
AT4G16130.1	AT4G16130.1	1895
AT4G16340.2;AT4G16340.1	AT4G16340.2;AT4G16340.1	1898
AT4G21180.2;AT4G21180.1	AT4G21180.2;AT4G21180.1	1936
AT4G22880.3;AT4G22880.2;AT4G22880.1	AT4G22880.3;AT4G22880.2;AT4G22880.1	1951
AT4G23460.1;AT4G11380.1;AT4G11380.2;AT4G23460.2	AT4G23460.1;AT4G11380.1;AT4G11380.2	1957
AT4G23920.1;AT1G12780.1	AT4G23920.1;AT1G12780.1	1966
AT4G24220.2;AT4G24220.1	AT4G24220.2;AT4G24220.1	1969
AT4G24520.2;AT4G24520.1	AT4G24520.2;AT4G24520.1	1976
AT4G24840.1	AT4G24840.1	1984
AT4G26300.4;AT4G26300.2;AT4G26300.3;AT4G26300.1;AT4G26300.5	AT4G26300.4;AT4G26300.2;AT4G26300.3;AT4G26300.1;AT4G26300.5	2003
AT4G30530.1	AT4G30530.1	2056
AT4G30600.2;AT4G30600.1	AT4G30600.2;AT4G30600.1	2057
AT4G32260.1	AT4G32260.1	2080
AT4G36750.1	AT4G36750.1	2148
AT4G38510.4;AT4G38510.3;AT4G38510.2;AT4G38510.1;AT4G38510.5	AT4G38510.4;AT4G38510.3;AT4G38510.2;AT4G38510.1;AT4G38510.5	2162
AT4G39350.1;AT2G21770.1	AT4G39350.1	2178
AT5G01010.1;AT5G01010.4;AT5G01010.5;AT5G01010.2;AT5G01010.3	AT5G01010.1;AT5G01010.4;AT5G01010.5;AT5G01010.2;AT5G01010.3	2188
AT5G02270.1;AT5G02270.2	AT5G02270.1;AT5G02270.2	2197
AT5G03540.1;AT5G03540.3;AT5G03540.2;AT5G52340.1	AT5G03540.1;AT5G03540.3;AT5G03540.2	2213
AT5G04530.1	AT5G04530.1	2231
AT5G09870.1	AT5G09870.1	2281
AT5G10470.1;AT5G10470.2	AT5G10470.1;AT5G10470.2	2290
AT5G11580.2;AT5G11580.1	AT5G11580.2;AT5G11580.1	2304
AT5G11980.1;AT5G11980.2	AT5G11980.1	2310
AT5G13530.2;AT5G13530.1	AT5G13530.2;AT5G13530.1	2332
AT5G16760.1	AT5G16760.1	2376
AT5G17050.1;AT5G17040.2;AT5G17040.1	AT5G17050.1	2382
AT5G17890.1	AT5G17890.1	2396
AT5G19320.2;AT5G19320.1	AT5G19320.2;AT5G19320.1	2409
AT5G19485.1	AT5G19485.1	2412
AT5G20070.1	AT5G20070.1	2424
AT5G22330.1	AT5G22330.1	2446
AT5G24350.3;AT5G24350.1;AT5G24350.2	AT5G24350.3;AT5G24350.1;AT5G24350.2	2470
AT5G28900.1;AT5G28850.2;AT5G28850.1;AT1G54450.1	AT5G28900.1;AT5G28850.2;AT5G28850.1	2506
AT5G37475.3;AT5G37475.2;AT5G37475.1	AT5G37475.3;AT5G37475.2;AT5G37475.1	2520
AT5G38880.1	AT5G38880.1	2534
AT5G39500.2;AT5G39500.1	AT5G39500.2;AT5G39500.1	2539
AT5G45420.3;AT5G45420.2;AT5G45420.1	AT5G45420.3;AT5G45420.2;AT5G45420.1	2588
AT5G47210.1;AT5G47210.3;AT5G47210.2;AT4G16830.2;AT4G16830.3;AT4G16830.1	AT5G47210.1;AT5G47210.3;AT5G47210.2	2613
AT5G47540.1;AT4G17270.1	AT5G47540.1	2616
AT5G48520.1;AT5G48520.2	AT5G48520.1;AT5G48520.2	2632
AT5G49360.1	AT5G49360.1	2638
AT5G51430.1	AT5G51430.1	2667
AT5G51700.1;AT5G51700.2	AT5G51700.1;AT5G51700.2	2669
AT5G53560.1	AT5G53560.1	2690
AT5G54960.1	AT5G54960.1	2710
AT5G56680.1;AT1G70980.1	AT5G56680.1	2732
AT5G56760.1	AT5G56760.1	2734
AT5G62560.1	AT5G62560.1	2785
AT5G63640.2;AT5G63640.1	AT5G63640.2;AT5G63640.1	2796
AT5G64460.8;AT5G64460.6;AT5G64460.4;AT5G64460.3;AT5G64460.2;AT5G64460.10;AT5G64460.1;AT5G64460.5;AT5G64460.9;AT5G64460.7;AT5G64460.11	AT5G64460.8;AT5G64460.6;AT5G64460.4;AT5G64460.3;AT5G64460.2;AT5G64460.10;AT5G64460.1	2813
AT5G64830.1;AT5G64830.3;AT5G64830.2	AT5G64830.1;AT5G64830.3;AT5G64830.2	2815
AT5G66280.1	AT5G66280.1	2838

## Sheet: imputation and t-test
a two-sided t-test for comparison between samples from PafA-CC1 and PafA-LTI6B, with corrected false positive by permutation-based FDR calculation using thresholds FDR = 0.05 and S0 = 1.
Significant	#NAME?	Difference	Protein IDs	Majority protein IDs	id	Symbol color	Symbol type	Symbol size	Show label	Only identified by site	Reverse	Potential contaminant	Taxonomy IDs	Peptides	Razor + unique peptides	Unique peptides	Sequence coverage [%]	Unique + razor sequence coverage [%]	Unique sequence coverage [%]	Mol. weight [kDa]	Q-value	Score	Intensity	iBAQ peptides	MS/MS count	LFQ intensity Lti6B_rep1	LFQ intensity Lti6B_rep2	LFQ intensity Lti6B_rep3	LFQ intensity CC1_rep1	LFQ intensity CC1_rep2	LFQ intensity CC1_rep3
+	5.34052	8.18299	AT5G11580.2;AT5G11580.1	AT5G11580.2;AT5G11580.1	2304	Color2 [DarkGray]	1	4					-1	4	4	4	15.4	15.4	15.4	44.499	0	28.155	18703000	19	12	14.1146	13.5221	13.3247	21.7434	21.898	21.8689
+	7.66739	7.99882	AT2G22125.1	AT2G22125.1	866	Color2 [DarkGray]	1	4					-1	83	83	83	53.4	53.4	53.4	230.7	0	323.31	80725000	110	301	12.9578	12.9768	12.8157	20.9203	20.9743	20.8522
+	5.24331	6.4344	AT1G45688.1;AT1G45688.2	AT1G45688.1	382	Color2 [DarkGray]	1	4					-1	14	14	14	48.5	48.5	48.5	37.201	0	323.31	18921000	16	50	13.9079	13.5285	14.1929	20.3079	20.4147	20.2099
+	4.94235	5.88052	AT4G32410.1;AT2G25540.1;AT5G17420.1	AT4G32410.1	2082	Color2 [DarkGray]	1	4					-1	39	39	32	44.1	44.1	41.5	122.24	0	323.31	25438000	50	129	14.6677	13.9566	14.3597	20.1136	20.3552	20.1567
+	4.68629	5.01254	AT5G05170.1	AT5G05170.1	2242	Color2 [DarkGray]	1	4					-1	34	32	31	36.9	36.4	34.6	119.68	0	323.31	28966000	51	124	16.4327	16.4041	15.7799	21.2728	21.2374	21.1442
+	4.0569	4.79617	AT1G25490.1	AT1G25490.1	285	Color2 [DarkGray]	1	4					-1	19	19	17	41.7	41.7	38.1	65.493	0	323.31	19891000	32	91	16.161	15.3284	16.1247	20.6932	20.8676	20.4418
+	6.34636	4.78454	AT3G04120.1	AT3G04120.1	1199	Color2 [DarkGray]	1	4					-1	27	4	4	78.4	18.9	18.9	36.914	0	73.058	3695700	21	13	14.1771	14.4313	14.241	19.0327	19.0646	19.1057
+	3.79123	4.75445	AT2G29980.1	AT2G29980.1	942	Color2 [DarkGray]	1	4					-1	2	2	2	4.9	4.9	4.9	44.076	0	39.314	1883500	12	9	14.5907	13.4085	14.0925	18.7154	18.8683	18.7714
+	4.62979	4.42669	AT3G33530.4;AT3G33530.1;AT3G33530.2;AT3G33530.3;AT3G33530.5	AT3G33530.4;AT3G33530.1;AT3G33530.2;AT3G33530.3;AT3G33530.5	1523	Color2 [DarkGray]	1	4					-1	19	19	19	28	28	28	143.98	0	299.52	7165600	60	66	13.5198	14.0919	13.5093	18.1794	18.1764	18.0452
+	2.8804	4.13828	AT1G01950.1;AT1G01950.2;AT1G01950.3;AT1G01950.4	AT1G01950.1;AT1G01950.2;AT1G01950.3;AT1G01950.4	10	Color2 [DarkGray]	1	4					-1	12	12	12	24.2	24.2	24.2	98.421	0	147.37	2103500	50	35	13.858	13.6684	12.2231	17.4224	17.3651	17.3769
+	3.84102	4.02369	AT1G10430.2;AT1G10430.1	AT1G10430.2;AT1G10430.1	129	Color2 [DarkGray]	1	4					-1	6	3	3	36.3	16.3	16.3	34.934	0	153.07	1280300	17	12	14.549	13.9181	13.5946	18.0742	18.1054	17.9532
+	5.32381	3.85069	AT5G64740.1;AT4G18780.1	AT5G64740.1	2814	Color2 [DarkGray]	1	4					-1	18	17	9	23.4	21.8	13.5	122.5	0	323.31	4613800	51	52	14.9771	14.6725	14.687	18.743	18.5953	18.5505
+	4.85294	3.76037	AT1G24764.1;AT1G24764.3	AT1G24764.1;AT1G24764.3	280	Color2 [DarkGray]	1	4					-1	24	7	3	38.6	11.7	4.9	70.206	0	130.52	2864200	29	20	14.2451	13.7912	14.1985	17.9004	17.8076	17.8078
+	4.10975	3.7305	AT2G47240.3;AT2G47240.2;AT2G47240.1;AT2G47240.4	AT2G47240.3;AT2G47240.2;AT2G47240.1;AT2G47240.4	1139	Color2 [DarkGray]	1	4					-1	32	32	32	49.8	49.8	49.8	74.597	0	323.31	20484000	33	114	16.3769	16.1291	15.7159	19.8181	19.9985	19.5967
+	4.26783	3.69077	AT1G51500.1	AT1G51500.1	424	Color2 [DarkGray]	1	4					-1	14	14	12	26.2	26.2	23.6	76.45	0	161.96	3337200	34	46	13.6578	14.1343	13.4658	17.3675	17.5128	17.4499
+	5.27146	3.67256	AT1G51690.4;AT1G51690.1;AT1G51690.2;AT1G51690.5;AT1G51690.3	AT1G51690.4;AT1G51690.1;AT1G51690.2;AT1G51690.5;AT1G51690.3	430	Color2 [DarkGray]	1	4					-1	10	10	10	37.8	37.8	37.8	56.934	0	268.78	2115200	25	37	13.7563	13.5505	13.6111	17.3978	17.4159	17.1219
+	3.01864	3.6553	AT2G26570.2;AT2G26570.1	AT2G26570.2;AT2G26570.1	913	Color2 [DarkGray]	1	4					-1	18	18	17	39.8	39.8	37.3	89.293	0	233.2	2076400	49	50	12.7892	14.2186	13.6994	17.1687	17.1985	17.3058
+	4.58145	3.64695	AT4G00810.2;AT4G00810.1	AT4G00810.2;AT4G00810.1	1764	Color2 [DarkGray]	1	4					-1	2	2	2	50.4	50.4	50.4	11.307	0	45.556	1196800	3	10	14.0373	14.0932	13.5959	17.468	17.5363	17.663
+	4.09974	3.64401	AT1G08200.1	AT1G08200.1	99	Color2 [DarkGray]	1	4					-1	13	3	3	46.5	13.1	13.1	43.79	0	70.614	1500800	26	11	14.0264	13.9735	14.6525	17.847	17.9315	17.8059
+	5.58692	3.61956	AT3G50590.2;AT3G50590.1	AT3G50590.2;AT3G50590.1	1593	Color2 [DarkGray]	1	4					-1	10	10	10	11.2	11.2	11.2	174.99	0	120.57	1539500	79	29	13.8472	13.9097	13.6207	17.3529	17.4309	17.4525
+	3.7963	3.56239	AT3G28715.1	AT3G28715.1	1511	Color2 [DarkGray]	1	4					-1	10	10	0	49	49	0	40.787	0	189.63	1803200	19	31	14.3499	14.1799	14.9073	18.022	18.2854	17.8169
+	1.59521	3.4377	AT5G57460.1	AT5G57460.1	2741	Color2 [DarkGray]	1	4					-1	5	5	5	13.9	13.9	13.9	70.511	0	89.178	1961500	32	20	16.5195	13.3574	13.8114	17.9567	18.1013	17.9435
+	2.96451	3.39154	AT3G07300.1;AT3G07300.2;AT3G07300.3	AT3G07300.1;AT3G07300.2;AT3G07300.3	1250	Color2 [DarkGray]	1	4					-1	2	2	2	8.4	8.4	8.4	43.598	0	47.205	1283100	16	11	13.9846	15.0361	13.7224	17.696	17.6116	17.6101
+	4.55516	3.32628	AT3G25800.1;AT3G25800.3;AT3G25800.2	AT3G25800.1;AT3G25800.3;AT3G25800.2	1475	Color2 [DarkGray]	1	4					-1	12	10	9	30	26.4	21.3	65.597	0	111.79	2989500	30	33	14.7964	14.6572	14.8501	18.048	18.3633	17.8713
+	3.39106	3.31168	AT1G59830.1;AT1G59830.2	AT1G59830.1;AT1G59830.2	499	Color2 [DarkGray]	1	4					-1	7	7	4	45.4	45.4	25.5	34.96	0	177.56	1944900	18	24	13.7824	14.5145	14.7942	17.7266	17.7086	17.5909
+	3.11252	3.24537	AT1G67930.1	AT1G67930.1	586	Color2 [DarkGray]	1	4					-1	5	5	5	14.2	14.2	14.2	91.65	0	100.62	1005400	39	13	14.5553	13.5004	13.497	17.0978	17.1112	17.0798
+	3.699	3.23083	AT4G24520.2;AT4G24520.1	AT4G24520.2;AT4G24520.1	1976	Color2 [DarkGray]	1	4					-1	7	7	7	13.8	13.8	13.8	76.324	0	62.357	982310	38	16	14.058	14.1015	13.3592	17.1895	16.9994	17.0223
+	2.71765	3.17515	AT3G11910.4;AT3G11910.2;AT3G11910.3;AT3G11910.1	AT3G11910.4;AT3G11910.2;AT3G11910.3;AT3G11910.1	1301	Color2 [DarkGray]	1	4					-1	18	18	9	26.7	26.7	12.7	130.52	0	187.98	2971800	65	51	13.7686	15.1987	14.0553	17.5587	17.469	17.5204
+	5.04959	3.11807	AT4G39350.1;AT2G21770.1	AT4G39350.1	2178	Color2 [DarkGray]	1	4					-1	14	9	9	20.5	15.7	15.7	122.07	0	155.74	944950	48	18	13.9746	13.6445	13.657	16.8688	16.8551	16.9064
+	2.96892	3.11114	AT1G35220.3;AT1G35220.2;AT1G35220.1;AT1G35220.7;AT1G35220.4;AT1G35220.6;AT1G35220.5	AT1G35220.3;AT1G35220.2;AT1G35220.1;AT1G35220.7;AT1G35220.4;AT1G35220.6;AT1G35220.5	355	Color2 [DarkGray]	1	4					-1	15	15	15	27.4	27.4	27.4	111.28	0	248.76	2071800	50	35	13.9373	13.2589	14.5242	17.0224	16.9404	17.091
+	5.19713	3.10612	AT1G29880.1	AT1G29880.1	313	Color2 [DarkGray]	1	4					-1	20	20	20	37.7	37.7	37.7	81.943	0	230.69	5690900	43	64	15.3725	15.122	15.4512	18.4287	18.4348	18.4005
+	4.74314	3.08556	AT2G32240.1	AT2G32240.1	970	Color2 [DarkGray]	1	4					-1	37	37	36	40	40	38.9	148.61	0	323.31	6560100	94	109	14.0211	14.0542	14.4082	17.2842	17.1755	17.2805
+	5.02768	3.03998	AT1G68060.1;AT4G17220.1	AT1G68060.1	588	Color2 [DarkGray]	1	4					-1	27	27	9	50.5	50.5	21.2	69.289	0	323.31	14198000	28	89	16.9667	16.9171	16.6254	19.9022	19.8456	19.8813
+	5.18173	3.02445	AT3G58500.1	AT3G58500.1	1691	Color2 [DarkGray]	1	4					-1	9	9	4	51.4	51.4	24.9	35.767	0	301.77	4387200	16	40	16.2315	16.2452	15.9595	19.2172	19.1117	19.1806
+	1.39584	3.01138	AT5G17380.1	AT5G17380.1	2387	Color2 [DarkGray]	1	4					-1	6	6	6	18.7	18.7	18.7	61.47	0	58.738	1320600	32	16	14.1807	13.4983	16.7744	17.8333	18.0461	17.6081
+	5.32621	2.98465	AT2G32900.1	AT2G32900.1	976	Color2 [DarkGray]	1	4					-1	8	8	8	19.4	19.4	19.4	83.933	0	174.78	989390	45	17	14.232	14.3513	14.0481	17.2175	17.1918	17.1761
+	5.27482	2.97659	AT1G78880.1	AT1G78880.1	708	Color2 [DarkGray]	1	4					-1	2	2	2	9.8	9.8	9.8	50.104	0	34.953	771750	23	9	14.0509	13.9227	13.7364	16.8787	16.8712	16.8899
+	3.59964	2.94006	AT5G16970.1;AT5G16990.1;AT5G16980.3;AT5G16980.1;AT5G16980.2;AT5G17000.1	AT5G16970.1	2381	Color2 [DarkGray]	1	4					-1	15	15	15	67.5	67.5	67.5	38.133	0	279.95	5376000	18	56	16.2877	15.9089	15.4696	18.7579	18.8774	18.8511
+	3.51056	2.92815	AT2G21410.1	AT2G21410.1	861	Color2 [DarkGray]	1	4					-1	7	5	5	16.7	12.7	12.7	93.105	0	58.02	998790	32	15	14.1927	13.887	14.7195	17.2205	17.076	17.2872
+	7.35765	2.82029	AT3G63130.2;AT3G63130.1	AT3G63130.2;AT3G63130.1	1746	Color2 [DarkGray]	1	4					-1	13	13	13	40.6	40.6	40.6	58.826	0	323.31	5832200	26	51	15.4697	15.4817	15.4917	18.3464	18.2989	18.2588
+	4.24103	2.81456	AT3G01780.1;AT3G01780.2	AT3G01780.1;AT3G01780.2	1167	Color2 [DarkGray]	1	4					-1	13	13	13	18.1	18.1	18.1	130.91	0	150.25	1883700	63	45	14.1856	13.6789	13.9238	16.6293	16.815	16.7878
+	4.0543	2.79142	AT5G51430.1	AT5G51430.1	2667	Color2 [DarkGray]	1	4					-1	6	6	6	12.1	12.1	12.1	92.258	0	57.521	773040	42	18	13.3927	13.385	13.9073	16.329	16.3925	16.3378
+	3.58849	2.769	AT3G63460.1;AT3G63460.2;AT3G63460.3	AT3G63460.1;AT3G63460.2;AT3G63460.3	1752	Color2 [DarkGray]	1	4					-1	13	13	13	19.6	19.6	19.6	119.87	0	295.99	2972700	47	52	14.1448	13.9047	14.6698	17.0169	17.0368	16.9725
+	2.26089	2.76461	AT1G41880.1;AT1G41880.2;AT1G07070.1	AT1G41880.1;AT1G41880.2	364	Color2 [DarkGray]	1	4					-1	5	5	2	51.4	51.4	24.3	12.799	0	56.173	920290	5	14	14.1952	13.5079	15.2196	16.885	17.2102	17.1213
+	4.88627	2.71473	AT5G60210.6;AT5G60210.4;AT5G60210.2;AT5G60210.1;AT5G60210.5;AT5G60210.3	AT5G60210.6;AT5G60210.4;AT5G60210.2;AT5G60210.1;AT5G60210.5;AT5G60210.3	2763	Color2 [DarkGray]	1	4					-1	11	11	11	29.6	29.6	29.6	63.712	0	159.56	2949800	32	41	15.8444	15.5798	15.7419	18.5281	18.2981	18.4841
+	2.31943	2.71062	AT2G20050.2;AT2G20050.1	AT2G20050.2;AT2G20050.1	837	Color2 [DarkGray]	1	4					-1	11	11	11	16.6	16.6	16.6	121.09	0	138.56	1542900	50	36	13.9664	12.7521	14.0995	16.3029	16.6919	15.955
+	3.03389	2.70631	AT3G12580.1	AT3G12580.1	1315	Color2 [DarkGray]	1	4					-1	33	10	9	53.7	22	22	71.101	0	102.88	1822000	37	33	14.1366	14.5389	13.5181	16.8556	16.6071	16.8498
+	2.96102	2.66681	AT3G57890.1;AT3G57890.2;AT2G42230.1;AT2G42230.2	AT3G57890.1;AT3G57890.2	1687	Color2 [DarkGray]	1	4					-1	7	7	7	22.3	22.3	22.3	62.778	0	254.97	2861600	25	32	16.0408	15.5777	14.9633	18.2895	18.1975	18.0953
+	2.90094	2.66444	AT4G38510.4;AT4G38510.3;AT4G38510.2;AT4G38510.1;AT4G38510.5	AT4G38510.4;AT4G38510.3;AT4G38510.2;AT4G38510.1;AT4G38510.5	2162	Color2 [DarkGray]	1	4					-1	27	4	4	71.9	10.9	10.9	54.304	0	67.821	633690	24	11	13.4411	14.1465	13.0517	16.0905	16.2009	16.3412
+	4.14487	2.65335	AT2G24270.3;AT2G24270.1;AT2G24270.2;AT2G24270.4	AT2G24270.3;AT2G24270.1;AT2G24270.2;AT2G24270.4	884	Color2 [DarkGray]	1	4					-1	11	11	11	35.1	35.1	35.1	53.06	0	323.31	4281200	25	45	15.4094	14.9408	15.0009	17.8429	17.8038	17.6644
+	3.26794	2.62657	AT2G31660.1	AT2G31660.1	959	Color2 [DarkGray]	1	4					-1	2	2	2	3.4	3.4	3.4	119.25	0	45.426	586030	52	9	14.4856	13.6877	14.0739	16.7828	16.8705	16.4736
+	3.54534	2.61461	AT2G44160.1	AT2G44160.1	1114	Color2 [DarkGray]	1	4					-1	9	6	6	26.4	21.4	21.4	66.801	0	89.266	1011700	36	18	14.2557	13.791	13.5411	16.3456	16.5316	16.5544
+	1.32287	2.60872	AT5G56260.5;AT5G56260.2;AT5G56260.1;AT5G56260.4;AT5G56260.3	AT5G56260.5;AT5G56260.2;AT5G56260.1;AT5G56260.4;AT5G56260.3	2727	Color2 [DarkGray]	1	4					-1	5	5	5	59	59	59	17.567	0	149.99	1211800	10	19	13.5167	14.0396	16.5034	17.4232	17.2116	17.251
+	1.21071	2.60073	AT1G79690.2;AT1G79690.1	AT1G79690.2;AT1G79690.1	718	Color2 [DarkGray]	1	4					-1	7	7	7	14	14	14	86.856	0	56.414	1190200	47	19	13.9748	13.0232	16.4097	16.9923	17.0657	17.1518
+	1.59121	2.59195	AT5G56030.1;AT5G56030.2	AT5G56030.1;AT5G56030.2	2726	Color2 [DarkGray]	1	4					-1	37	3	3	53.5	4.1	4.1	80.063	0	87.487	1176500	34	13	13.799	16.0671	14.2155	17.8242	16.9883	17.0451
+	3.75849	2.52184	AT4G30600.2;AT4G30600.1	AT4G30600.2;AT4G30600.1	2057	Color2 [DarkGray]	1	4					-1	3	3	3	7.3	7.3	7.3	69.572	0	19.354	449800	38	8	13.3933	14.0267	13.8105	16.3001	16.2609	16.2351
+	4.57857	2.47591	AT1G14840.1;AT1G14840.2	AT1G14840.1;AT1G14840.2	178	Color2 [DarkGray]	1	4					-1	14	8	7	28.1	16.2	14.6	67.487	0	117.63	1247300	33	25	13.8988	14.0966	13.7041	16.3914	16.3798	16.356
+	2.00099	2.46199	AT5G09870.1	AT5G09870.1	2281	Color2 [DarkGray]	1	4					-1	14	5	5	16.8	5.9	5.9	120.86	0	42.226	498030	49	11	12.8523	14.5126	14.3754	16.4747	16.3154	16.3362
+	4.03838	2.45223	AT1G10350.1	AT1G10350.1	128	Color2 [DarkGray]	1	4					-1	4	4	4	13.5	13.5	13.5	38.756	0	65.848	407390	20	9	13.9478	13.6846	13.6034	16.4112	16.0218	16.1596
+	5.51092	2.45086	AT4G15802.1	AT4G15802.1	1892	Color2 [DarkGray]	1	4					-1	4	4	4	41.9	41.9	41.9	9.3472	0	51.318	603590	6	9	13.96	13.9446	13.9981	16.4009	16.3179	16.5366
+	1.97396	2.44116	AT2G25450.1	AT2G25450.1	899	Color2 [DarkGray]	1	4					-1	2	2	2	15	15	15	40.351	0	17.84	703040	18	11	13.4883	13.5224	15.109	16.3376	16.5648	16.5409
+	5.58995	2.42449	AT3G23810.1	AT3G23810.1	1455	Color2 [DarkGray]	1	4					-1	27	7	7	70.9	29.7	29.7	53.159	0	235.81	7862400	23	49	16.8066	16.7207	16.789	19.1058	19.1843	19.2997
+	4.69673	2.40435	AT3G08947.1;AT3G08947.2	AT3G08947.1;AT3G08947.2	1266	Color2 [DarkGray]	1	4					-1	3	3	3	9	9	9	72.781	0	32.47	470180	30	9	13.8009	13.7679	13.9311	16.1202	16.4153	16.1773
+	3.21114	2.35798	AT3G04520.2;AT3G04520.3;AT3G04520.1	AT3G04520.2;AT3G04520.3;AT3G04520.1	1204	Color2 [DarkGray]	1	4					-1	10	10	10	46.6	46.6	46.6	38.123	0	181.88	1850400	20	32	14.9637	15.4413	14.6401	17.3585	17.4905	17.27
+	4.64752	2.35096	AT1G12840.1	AT1G12840.1	159	Color2 [DarkGray]	1	4					-1	13	13	13	49.3	49.3	49.3	42.619	0	160.45	4895600	26	52	15.6645	15.5564	15.336	17.9404	17.8108	17.8586
+	1.59904	2.34443	AT5G41970.1	AT5G41970.1	2559	Color2 [DarkGray]	1	4					-1	10	10	10	36.2	36.2	36.2	42.299	0	102.24	1681600	23	35	14.871	13.1907	15.4263	16.8669	16.8317	16.8228
+	2.81171	2.33198	AT4G09670.1	AT4G09670.1	1823	Color2 [DarkGray]	1	4					-1	7	7	7	37	37	37	39.562	0	47.307	748040	19	14	14.6976	13.7479	13.9032	16.456	16.3151	16.5736
+	2.61828	2.3212	AT4G28480.1;AT4G28480.2	AT4G28480.1;AT4G28480.2	2034	Color2 [DarkGray]	1	4					-1	7	7	5	35.6	35.6	30.7	38.191	0	151.65	1369400	16	22	14.0262	15.1434	14.2979	16.7594	16.9097	16.762
+	5.36635	2.28557	AT1G05680.1;AT1G05675.1	AT1G05680.1	63	Color2 [DarkGray]	1	4					-1	4	4	4	15.9	15.9	15.9	51.05	0	51.645	599190	19	12	14.1506	14.0424	14.2511	16.4367	16.3829	16.4812
+	2.25834	2.28105	AT3G01340.2;AT3G01340.1	AT3G01340.2;AT3G01340.1	1159	Color2 [DarkGray]	1	4					-1	6	6	5	42.1	42.1	34.4	32.63	0	79.964	936050	16	16	14.3055	14.7142	13.3112	16.448	16.3084	16.4177
+	2.98383	2.26892	AT5G10470.1;AT5G10470.2	AT5G10470.1;AT5G10470.2	2290	Color2 [DarkGray]	1	4					-1	12	10	10	12.1	10.2	10.2	141.03	0	121.09	1657600	63	27	13.9037	14.5015	14.798	16.6214	16.6385	16.75
+	6.40446	2.26535	AT4G11150.1;AT3G08560.1	AT4G11150.1	1841	Color2 [DarkGray]	1	4					-1	22	22	15	77	77	61.3	26.06	0	323.31	23909000	15	121	17.9017	17.8438	17.8962	20.2049	20.0985	20.1343
+	2.78554	2.24341	AT4G30210.2;AT4G30210.1;AT4G30210.3	AT4G30210.2;AT4G30210.1;AT4G30210.3	2052	Color2 [DarkGray]	1	4					-1	9	9	9	26.7	26.7	26.7	78.926	0	86.549	1170000	39	26	14.8677	13.8733	14.5568	16.7519	16.6076	16.6686
+	2.62519	2.22782	AT5G19510.1	AT5G19510.1	2413	Color2 [DarkGray]	1	4					-1	7	7	6	37.5	37.5	37.5	24.201	0	97.463	1833300	10	29	14.6937	15.2186	14.9562	17.1856	16.6852	17.6811
+	5.27205	2.18814	AT3G51160.1	AT3G51160.1	1599	Color2 [DarkGray]	1	4					-1	10	10	6	37.5	37.5	26.8	41.961	0	323.31	6298200	22	62	16.113	15.9119	16.0231	18.2682	18.1913	18.1529
+	1.62682	2.17686	AT5G28900.1;AT5G28850.2;AT5G28850.1;AT1G54450.1	AT5G28900.1;AT5G28850.2;AT5G28850.1	2506	Color2 [DarkGray]	1	4					-1	6	6	6	17.9	17.9	17.9	62.018	0	63.641	1165300	27	22	14.2372	15.3427	13.2451	16.3952	16.6184	16.3419
+	3.4798	2.17216	AT5G02270.1;AT5G02270.2	AT5G02270.1;AT5G02270.2	2197	Color2 [DarkGray]	1	4					-1	2	2	2	11.9	11.9	11.9	36.922	0	22.834	413620	19	6	13.6645	14.2927	14.0079	16.0622	16.1693	16.2501
+	4.23347	2.17215	AT5G58140.7;AT5G58140.6;AT5G58140.5;AT5G58140.2;AT5G58140.1;AT5G58140.3;AT5G58140.4	AT5G58140.7;AT5G58140.6;AT5G58140.5;AT5G58140.2;AT5G58140.1;AT5G58140.3;AT5G58140.4	2747	Color2 [DarkGray]	1	4					-1	22	22	22	38.7	38.7	38.7	102.47	0	323.31	6562700	47	83	16.3704	16.3954	16.0376	18.5181	18.3882	18.4135
+	2.78044	2.17147	AT5G47540.1;AT4G17270.1	AT5G47540.1	2616	Color2 [DarkGray]	1	4					-1	6	6	6	27.7	27.7	27.7	39.457	0	105.21	584310	18	13	13.7266	13.8417	14.5904	16.105	16.4191	16.149
+	0.885971	2.15696	AT5G08570.3;AT5G08570.2;AT5G08570.1	AT5G08570.3;AT5G08570.2;AT5G08570.1	2271	Color2 [DarkGray]	1	4					-1	6	6	4	18.2	18.2	14.5	54.976	0	55.207	1297700	29	17	17.0798	14.0689	13.4059	17.0714	17.131	16.8231
+	5.72399	2.14491	AT4G13940.1;AT4G13940.3;AT4G13940.2;AT4G13940.4	AT4G13940.1;AT4G13940.3;AT4G13940.2;AT4G13940.4	1870	Color2 [DarkGray]	1	4					-1	31	31	11	74.4	74.4	31.5	53.378	0	323.31	82154000	25	246	19.5987	19.43	19.4876	21.6585	21.665	21.6275
+	0.762791	2.1366	AT4G09730.1	AT4G09730.1	1825	Color2 [DarkGray]	1	4					-1	6	6	6	16.4	16.4	16.4	68.923	0	64.724	1158000	33	16	13.5187	17.4561	13.6914	17.1488	16.823	17.1042
+	2.74842	2.12566	AT1G08420.2;AT1G08420.1	AT1G08420.2;AT1G08420.1	103	Color2 [DarkGray]	1	4					-1	7	7	1	11.6	11.6	4.1	108.08	0	77.267	752420	54	19	13.5771	14.401	13.5159	15.9632	15.8936	16.0142
+	5.65018	2.1027	AT1G20260.1	AT1G20260.1	233	Color2 [DarkGray]	1	4					-1	29	29	1	75.6	75.6	6.8	54.311	0	323.31	42948000	24	168	18.2465	18.1579	18.3359	20.3492	20.3636	20.3357
+	2.28209	2.09238	AT5G17890.1	AT5G17890.1	2396	Color2 [DarkGray]	1	4					-1	6	6	6	6.1	6.1	6.1	185.14	0	117.32	512600	78	13	13.9962	13.1845	14.4776	15.9231	16.0072	16.0052
+	1.91565	2.09018	AT1G14610.1	AT1G14610.1	174	Color2 [DarkGray]	1	4					-1	3	3	3	6	6	6	125.92	0	83.099	632720	56	11	13.4087	15.059	14.0686	16.2542	16.3214	16.2313
+	2.32841	2.08852	AT1G64900.1	AT1G64900.1	556	Color2 [DarkGray]	1	4					-1	4	4	4	16.6	16.6	16.6	58.604	0	80.386	811270	29	16	14.5736	13.4974	13.4919	16.0856	15.8663	15.8766
+	4.1715	2.08048	AT3G58730.1	AT3G58730.1	1697	Color2 [DarkGray]	1	4					-1	11	11	11	46.7	46.7	46.7	29.058	0	242.1	7648700	17	35	17.7063	17.6582	17.5223	19.9231	19.5773	19.6278
+	1.32033	2.07232	AT5G04870.1;AT3G10660.2;AT3G10660.1	AT5G04870.1	2238	Color2 [DarkGray]	1	4					-1	5	5	5	16.1	16.1	16.1	68.253	0	98.174	892730	33	19	15.5346	13.3594	13.3204	16.2264	16.1974	16.0076
+	4.84446	2.06726	AT4G13930.1	AT4G13930.1	1869	Color2 [DarkGray]	1	4					-1	19	19	19	62.8	62.8	62.8	51.717	0	323.31	10547000	21	74	18.0443	17.8664	18.0942	20.1304	20.0902	19.9861
+	0.756098	2.06581	AT5G55670.2;AT5G55670.1	AT5G55670.2;AT5G55670.1	2720	Color2 [DarkGray]	1	4					-1	4	4	4	10.3	10.3	10.3	64.024	0	83.008	1511100	23	20	13.9239	17.436	13.471	17.0007	17.1613	16.8662
+	5.39834	2.04179	AT3G01390.4;AT3G01390.3;AT3G01390.2;AT3G01390.1	AT3G01390.4;AT3G01390.3;AT3G01390.2;AT3G01390.1	1161	Color2 [DarkGray]	1	4					-1	11	11	11	81.8	81.8	81.8	12.397	0	323.31	16959000	5	53	18.1978	18.3221	18.3101	20.3598	20.2326	20.3629
+	2.48756	2.03578	AT4G02030.1;AT4G02030.2	AT4G02030.1;AT4G02030.2	1777	Color2 [DarkGray]	1	4					-1	5	5	5	7.6	7.6	7.6	88.515	0	39.345	468300	46	12	13.0515	14.1228	13.8566	15.7245	15.7572	15.6566
+	2.94848	2.02602	AT5G55860.1	AT5G55860.1	2722	Color2 [DarkGray]	1	4					-1	10	10	10	20.6	20.6	20.6	72.43	0	148.25	1354800	37	32	14.1098	14.9366	14.4459	16.4826	16.493	16.5947
+	2.54631	2.00814	AT4G32260.1	AT4G32260.1	2080	Color2 [DarkGray]	1	4					-1	2	2	2	17.8	17.8	17.8	23.917	0	51.465	551430	13	10	14.8879	14.3098	13.8448	16.2401	16.3869	16.4398
+	1.0946	2.00402	AT5G38880.1	AT5G38880.1	2534	Color2 [DarkGray]	1	4					-1	7	7	7	16.5	16.5	16.5	89.18	0	52.743	511000	39	12	12.9659	15.6965	13.2945	16.0228	15.9761	15.97
+	2.29566	1.99873	AT5G24350.3;AT5G24350.1;AT5G24350.2	AT5G24350.3;AT5G24350.1;AT5G24350.2	2470	Color2 [DarkGray]	1	4					-1	18	18	18	11.8	11.8	11.8	266.81	0	204.42	1797600	120	42	14.9133	14.7199	13.7643	16.4331	16.5574	16.4032
+	2.31257	1.99028	AT5G49810.1	AT5G49810.1	2644	Color2 [DarkGray]	1	4					-1	3	3	3	6.2	6.2	6.2	118.71	0	84.462	758800	50	15	14.2152	15.2774	15.0415	17.0637	16.8735	16.5677
+	5.08676	1.95384	AT4G24800.4;AT4G24800.3;AT4G24800.2;AT4G24800.1	AT4G24800.4;AT4G24800.3;AT4G24800.2;AT4G24800.1	1982	Color2 [DarkGray]	1	4					-1	27	27	27	60.4	60.4	60.4	77.435	0	323.31	21627000	33	143	17.4653	17.2654	17.4469	19.3858	19.3349	19.3184
+	2.1591	1.94848	AT5G04530.1	AT5G04530.1	2231	Color2 [DarkGray]	1	4					-1	7	7	7	29.3	29.3	29.3	52.612	0	97.107	489740	23	18	14.3211	13.0618	13.936	15.6927	15.874	15.5976
+	2.50568	1.94821	AT2G42600.3;AT2G42600.2;AT2G42600.1	AT2G42600.3;AT2G42600.2;AT2G42600.1	1087	Color2 [DarkGray]	1	4					-1	17	10	10	28.1	19.6	19.6	109.75	0	137.57	1061600	58	26	13.8728	13.4411	14.4865	15.865	15.8212	15.9588
+	2.2253	1.94673	AT2G07360.1;AT2G07360.2	AT2G07360.1;AT2G07360.2	775	Color2 [DarkGray]	1	4					-1	11	11	11	17.9	17.9	17.9	130.08	0	92.436	1503500	53	34	14.5506	14.4858	13.4378	16.0768	16.2137	16.0238
+	5.06601	1.94572	AT2G26250.1	AT2G26250.1	909	Color2 [DarkGray]	1	4					-1	10	10	10	24.2	24.2	24.2	61.96	0	184.89	3690400	29	32	16.7217	16.9082	16.7997	18.7366	18.8329	18.6972
+	2.48899	1.93944	AT4G30530.1	AT4G30530.1	2056	Color2 [DarkGray]	1	4					-1	3	3	3	22	22	22	28.385	0	42.337	584950	13	14	13.913	13.8421	14.7943	16.1175	16.1783	16.0719
+	4.12671	1.91912	AT2G01490.2;AT2G01490.1	AT2G01490.2;AT2G01490.1	744	Color2 [DarkGray]	1	4					-1	5	5	5	31.4	31.4	31.4	32.028	0	77.583	1934900	13	26	15.8066	15.8349	16.1011	17.7023	17.8849	17.9126
+	2.00554	1.90433	AT3G19770.1;AT3G19770.2	AT3G19770.1;AT3G19770.2	1409	Color2 [DarkGray]	1	4					-1	9	9	9	29.6	29.6	29.6	57.897	0	243.47	1433200	28	29	15.1566	16.1784	14.8087	17.2898	17.2323	17.3346
+	2.1666	1.90195	AT3G46220.4;AT3G46220.3;AT3G46220.1;AT3G46220.2	AT3G46220.4;AT3G46220.3;AT3G46220.1;AT3G46220.2	1550	Color2 [DarkGray]	1	4					-1	3	3	3	7.2	7.2	7.2	86.611	0	26.37	547710	40	14	14.619	14.3433	13.3999	16.0282	16.0728	15.967
+	4.65278	1.9017	AT1G60780.1	AT1G60780.1	511	Color2 [DarkGray]	1	4					-1	6	6	6	25.2	25.2	25.2	49.032	0	129.07	1241000	21	23	14.7571	14.8763	14.6522	16.6858	16.5625	16.7424
+	2.49893	1.89783	AT3G08943.1	AT3G08943.1	1265	Color2 [DarkGray]	1	4					-1	4	4	4	9.3	9.3	9.3	94.127	0	94.152	710690	34	13	14.6822	14.8304	13.8686	16.3812	16.3649	16.3286
+	1.75154	1.89613	AT1G79470.1	AT1G79470.1	715	Color2 [DarkGray]	1	4					-1	4	3	3	17.7	14.3	14.3	54.193	0	35.732	538760	20	13	14.2462	13.549	15.2251	16.1802	16.2173	16.3112
+	1.59092	1.88759	AT1G13320.2;AT1G13320.3;AT1G13320.1;AT1G13320.4	AT1G13320.2;AT1G13320.3;AT1G13320.1;AT1G13320.4	167	Color2 [DarkGray]	1	4					-1	6	5	5	14.5	12.5	12.5	59.998	0	66.033	1455400	27	27	14.0259	14.897	15.7796	17.1341	16.7906	16.4406
+	1.62636	1.88185	AT5G22770.6;AT5G22770.5;AT5G22770.4;AT5G22770.3;AT5G22770.2;AT5G22770.1;AT5G22780.2;AT5G22780.1	AT5G22770.6;AT5G22770.5;AT5G22770.4;AT5G22770.3;AT5G22770.2;AT5G22770.1;AT5G22780.2;AT5G22780.1	2450	Color2 [DarkGray]	1	4					-1	4	4	4	5.9	5.9	5.9	112.15	0	28.628	772930	52	13	14.7239	15.645	13.8189	16.6832	16.619	16.5313
+	3.31655	1.88006	AT2G26780.2;AT2G26780.1	AT2G26780.2;AT2G26780.1	916	Color2 [DarkGray]	1	4					-1	11	11	11	12.1	12.1	12.1	199.7	0	156.68	1200200	91	28	14.515	14.4382	14.7247	16.734	16.3966	16.1876
+	4.01707	1.86954	AT3G60860.1	AT3G60860.1	1719	Color2 [DarkGray]	1	4					-1	10	9	9	10.2	9.6	9.6	199.63	0	101.72	1964600	87	35	15.5213	15.8565	15.6252	17.4759	17.6692	17.4666
+	2.0472	1.86443	AT1G21630.3;AT1G21630.1;AT1G21630.4;AT1G21630.2	AT1G21630.3;AT1G21630.1;AT1G21630.4;AT1G21630.2	250	Color2 [DarkGray]	1	4					-1	9	9	9	16.6	16.6	16.6	129.45	0	89.543	995000	62	22	14.4498	13.6205	14.9647	16.1895	16.1759	16.2629
+	6.35149	1.85675	AT1G78900.2;AT1G78900.1	AT1G78900.2;AT1G78900.1	709	Color2 [DarkGray]	1	4					-1	32	32	32	65	65	65	68.812	0	323.31	52677000	38	190	18.673	18.6346	18.6919	20.5735	20.5066	20.4896
+	2.26781	1.85574	AT5G51700.1;AT5G51700.2	AT5G51700.1;AT5G51700.2	2669	Color2 [DarkGray]	1	4					-1	7	7	7	43.4	43.4	43.4	24.961	0	55.577	879180	12	21	13.8814	14.7849	14.9671	16.3181	16.4712	16.4114
+	2.78198	1.85573	AT4G28080.1	AT4G28080.1	2031	Color2 [DarkGray]	1	4					-1	12	8	8	10.4	6.8	6.8	199.11	0	66.786	1110500	95	23	15.3492	15.3074	14.626	16.8382	16.9209	17.0906
+	0.670902	1.85326	AT2G19480.3;AT2G19480.2;AT2G19480.1	AT2G19480.3;AT2G19480.2;AT2G19480.1	825	Color2 [DarkGray]	1	4					-1	6	6	5	28.5	28.5	24.5	42.846	0	73.673	2543500	13	24	17.6363	17.8914	14.0358	18.5598	18.0847	18.4787
+	0.813303	1.84625	AT1G09640.1;AT1G09640.2	AT1G09640.1;AT1G09640.2	120	Color2 [DarkGray]	1	4					-1	11	4	4	35.7	13.5	13.5	46.66	0	61.495	1580400	17	14	16.9589	17.1508	13.9075	17.8693	17.8264	17.8602
+	3.22853	1.8337	AT1G74690.1	AT1G74690.1	660	Color2 [DarkGray]	1	4					-1	3	3	3	11.2	11.2	11.2	65.199	0	49.5	453350	22	11	14.034	13.9549	13.4583	15.7106	15.6766	15.5611
+	5.60907	1.82857	AT2G24200.1;AT2G24200.2;AT2G24200.3	AT2G24200.1;AT2G24200.2;AT2G24200.3	883	Color2 [DarkGray]	1	4					-1	16	16	14	49.6	49.6	44.6	54.509	0	323.31	5564500	29	52	17.4019	17.4387	17.3039	19.2185	19.1667	19.245
+	4.03565	1.81813	AT5G52240.1;AT5G52240.2	AT5G52240.1;AT5G52240.2	2676	Color2 [DarkGray]	1	4					-1	9	9	8	52.3	52.3	45.5	24.405	0	291.27	22365000	9	49	19.3751	19.0997	19.1621	20.9501	20.9536	21.1876
+	3.61983	1.81661	AT5G56680.1;AT1G70980.1	AT5G56680.1	2732	Color2 [DarkGray]	1	4					-1	3	3	3	8.7	8.7	8.7	63.782	0	34.28	595990	28	11	14.7766	14.5623	15.0427	16.5712	16.7001	16.5602
+	4.49268	1.81132	AT1G31070.1;AT1G31070.2;AT2G35020.1	AT1G31070.1;AT1G31070.2	328	Color2 [DarkGray]	1	4					-1	3	3	3	12	12	12	42.443	0	24.197	493070	21	11	14.3327	14.1463	14.3854	16.1737	16.0071	16.1176
+	3.22341	1.80962	AT3G02930.2;AT3G02930.3;AT3G02930.1	AT3G02930.2;AT3G02930.3;AT3G02930.1	1188	Color2 [DarkGray]	1	4					-1	11	9	9	22.9	20.5	20.5	91.617	0	112.01	886730	45	24	14.0182	13.8834	14.4741	15.8672	15.922	16.0154
+	1.42107	1.80934	AT5G55230.3;AT5G55230.1;AT5G55230.2;AT4G26760.1	AT5G55230.3;AT5G55230.1;AT5G55230.2	2715	Color2 [DarkGray]	1	4					-1	9	9	9	30.2	30.2	30.2	65.784	0	99.618	1526200	25	29	15.5082	14.4014	15.6572	17.8796	16.5346	16.5805
+	4.41457	1.8011	AT3G44590.2;AT3G44590.1	AT3G44590.2;AT3G44590.1	1533	Color2 [DarkGray]	1	4					-1	2	2	2	40.5	40.5	40.5	11.015	0	19.192	431480	5	9	14.5141	14.4283	14.2859	16.0898	16.2455	16.2963
+	2.65116	1.79984	AT1G66840.2;AT1G66840.1	AT1G66840.2;AT1G66840.1	575	Color2 [DarkGray]	1	4					-1	4	4	4	13.2	13.2	13.2	70.239	0	47.111	763950	30	10	13.288	13.3794	14.0971	15.4328	15.3159	15.4153
+	3.71497	1.7856	AT5G24710.1	AT5G24710.1	2475	Color2 [DarkGray]	1	4					-1	14	14	14	18.9	18.9	18.9	148.07	0	221.06	2407200	64	46	15.4284	15.1654	15.0324	16.9231	17.1341	16.9258
+	2.49799	1.76056	AT5G48520.1;AT5G48520.2	AT5G48520.1;AT5G48520.2	2632	Color2 [DarkGray]	1	4					-1	6	6	6	14.7	14.7	14.7	69.724	0	134.11	505230	32	14	13.4014	14.1497	14.2526	15.7716	15.5502	15.7635
+	1.00089	1.7522	AT4G17530.1	AT4G17530.1	1907	Color2 [DarkGray]	1	4					-1	5	1	1	38.6	8.4	8.4	22.318	0.0004223	9.1768	769550	16	10	16.8282	14.1964	14.5943	17.0577	16.8523	16.9654
+	2.76551	1.72832	AT5G62560.1	AT5G62560.1	2785	Color2 [DarkGray]	1	4					-1	2	2	2	7.5	7.5	7.5	60.464	0	21.26	273130	29	8	13.3596	13.7005	12.9753	15.1665	15.1766	14.8772
+	4.33872	1.72819	AT3G16640.1	AT3G16640.1	1366	Color2 [DarkGray]	1	4					-1	9	9	9	81	81	81	18.91	0	221.1	19009000	9	70	19.2048	19.1692	18.9894	20.7464	20.8397	20.9618
+	3.01335	1.728	AT4G04640.1	AT4G04640.1	1802	Color2 [DarkGray]	1	4					-1	2	2	2	8.8	8.8	8.8	40.911	0	17.298	283270	20	8	13.2543	13.4083	13.9132	15.2413	15.2613	15.2572
+	1.42946	1.72756	AT1G70850.3;AT1G70850.1;AT1G70850.2;AT1G70840.1	AT1G70850.3;AT1G70850.1;AT1G70850.2	615	Color2 [DarkGray]	1	4					-1	6	5	5	42.7	35.8	35.8	35.57	0	53.43	1456600	15	28	14.5594	15.4367	13.7389	16.8551	15.996	16.0665
+	1.30293	1.7238	AT5G26360.1	AT5G26360.1	2482	Color2 [DarkGray]	1	4					-1	7	7	7	21.4	21.4	21.4	60.339	0	72.106	1074300	38	19	16.266	14.5046	14.3229	16.7172	16.7738	16.7739
+	1.51405	1.72069	AT2G47970.2;AT2G47970.1	AT2G47970.2;AT2G47970.1	1153	Color2 [DarkGray]	1	4					-1	4	4	4	18.6	18.6	18.6	39.787	0	55.241	362940	17	10	14.0968	13.1573	14.9425	15.6033	15.806	15.9492
+	1.32999	1.71398	AT1G30470.3;AT1G30470.2;AT1G30470.1	AT1G30470.3;AT1G30470.2;AT1G30470.1	322	Color2 [DarkGray]	1	4					-1	7	7	7	18.6	18.6	18.6	84.901	0	95.726	1056100	41	21	15.8745	13.8577	14.3997	16.3787	16.4586	16.4366
+	5.20148	1.7125	AT5G56010.1	AT5G56010.1	2725	Color2 [DarkGray]	1	4					-1	38	38	4	53.5	53.5	4.1	80.051	0	323.31	23243000	34	167	17.7767	17.6789	17.7163	19.5041	19.4588	19.3463
+	2.36283	1.71133	AT1G64950.1;AT5G61320.1;AT1G64940.1;AT2G12190.1	AT1G64950.1;AT5G61320.1;AT1G64940.1;AT2G12190.1	557	Color2 [DarkGray]	1	4					-1	3	3	3	5.5	5.5	5.5	59.115	0	33.764	344220	28	7	13.5994	14.1145	14.6088	15.8931	15.8012	15.7624
+	2.57506	1.70494	AT2G17420.2;AT2G17420.1	AT2G17420.2;AT2G17420.1	805	Color2 [DarkGray]	1	4					-1	6	6	4	32.4	32.4	20.8	38.257	0	65.292	586070	13	12	14.8699	14.0724	14.194	15.9551	16.1281	16.1679
+	1.26624	1.69194	AT1G11840.4;AT1G11840.3;AT1G11840.2;AT1G11840.1;AT1G11840.6;AT1G11840.5	AT1G11840.4;AT1G11840.3;AT1G11840.2;AT1G11840.1;AT1G11840.6	147	Color2 [DarkGray]	1	4					-1	5	5	5	28.6	28.6	28.6	31.928	0	45.124	871660	12	17	14.6107	15.8252	13.6637	16.4113	16.311	16.453
+	1.37619	1.69087	AT3G56430.1	AT3G56430.1	1671	Color2 [DarkGray]	1	4					-1	7	7	6	19.1	19.1	19.1	48.534	0	49.604	1040800	29	20	14.2132	15.9386	15.7559	17.2813	17.012	16.687
+	0.672586	1.66962	AT5G64130.1;AT5G64130.3	AT5G64130.1;AT5G64130.3	2806	Color2 [DarkGray]	1	4					-1	4	4	4	47.8	47.8	47.8	12.299	0	97.033	1305800	8	14	16.7857	16.9625	13.4986	17.3905	17.3831	17.482
+	3.96999	1.6649	AT5G54960.1	AT5G54960.1	2710	Color2 [DarkGray]	1	4					-1	5	5	5	14.7	14.7	14.7	65.817	0	66.357	480020	22	13	13.7106	13.914	13.999	15.5998	15.614	15.4046
+	2.66992	1.64911	AT1G48420.3;AT1G48420.2;AT1G48420.1	AT1G48420.3;AT1G48420.2;AT1G48420.1	393	Color2 [DarkGray]	1	4					-1	5	5	5	22.2	22.2	22.2	43.9	0	75.07	625740	20	15	14.6909	13.9079	14.4789	16.0289	16.0005	15.9957
+	3.35986	1.63353	AT1G12010.1	AT1G12010.1	152	Color2 [DarkGray]	1	4					-1	1	1	1	7.5	7.5	7.5	36.531	0	21.346	449350	11	14	14.3508	14.093	13.8306	15.7004	15.6906	15.784
+	1.12849	1.62372	AT5G04420.3;AT5G04420.2;AT5G04420.1	AT5G04420.3;AT5G04420.2;AT5G04420.1	2228	Color2 [DarkGray]	1	4					-1	3	3	3	11.5	11.5	11.5	56.659	0	46.955	737710	26	11	13.7027	15.1674	16.0006	16.5373	16.7396	16.4649
+	1.14678	1.62016	AT3G01500.4;AT3G01500.1;AT3G01500.3;AT3G01500.2	AT3G01500.4;AT3G01500.1;AT3G01500.3;AT3G01500.2	1164	Color2 [DarkGray]	1	4					-1	13	4	4	58.3	25.1	25.1	28.198	0	129.79	1296600	14	16	16.8615	15.7256	14.5606	17.3635	17.3075	17.3372
+	1.83885	1.61639	AT1G17720.1	AT1G17720.1	206	Color2 [DarkGray]	1	4					-1	8	8	1	27.9	27.9	3	56.274	0	91.5	851010	27	23	15.0354	14.4214	13.6833	16.0351	15.9737	15.9805
+	2.06797	1.61352	AT5G11980.1;AT5G11980.2	AT5G11980.1	2310	Color2 [DarkGray]	1	4					-1	5	5	5	10.7	10.7	10.7	63.052	0	52.005	414850	33	12	14.504	13.8456	13.3494	15.5446	15.5226	15.4725
+	2.1213	1.60952	AT5G53560.1	AT5G53560.1	2690	Color2 [DarkGray]	1	4					-1	2	2	2	29.9	29.9	29.9	15.084	0	23.709	263850	8	7	14.4741	13.4205	13.6422	15.3996	15.4417	15.5241
+	1.91277	1.60843	AT1G50200.1;AT1G50200.2	AT1G50200.1;AT1G50200.2	413	Color2 [DarkGray]	1	4					-1	15	15	15	22	22	22	110.49	0	168.18	2492300	54	39	15.6134	15.7768	15.7449	18.0529	16.9887	16.9187
+	2.31535	1.60107	AT3G12270.1	AT3G12270.1	1308	Color2 [DarkGray]	1	4					-1	4	4	4	10.1	10.1	10.1	67.343	0	33.258	504090	27	13	14.5191	13.8993	13.8614	15.9848	15.7526	15.3456
+	1.79349	1.60069	AT2G34680.1;AT2G34680.2	AT2G34680.1;AT2G34680.2	997	Color2 [DarkGray]	1	4					-1	6	6	6	7.5	7.5	7.5	186.86	0	60.102	544700	95	16	13.4713	14.8042	13.8519	15.6037	15.7469	15.5788
+	0.650249	1.59976	AT4G23680.1;AT2G01520.1;AT2G01530.1	AT4G23680.1	1962	Color2 [DarkGray]	1	4					-1	8	7	7	53	41.1	41.1	17.473	0	82.52	3088100	9	25	17.8014	14.4445	17.7505	18.3213	18.1418	18.3326
+	3.08344	1.59123	AT1G65010.1	AT1G65010.1	559	Color2 [DarkGray]	1	4					-1	21	21	21	25.4	25.4	25.4	152.7	0	194.43	3128200	77	66	16.2004	16.5283	16.6547	18.2215	17.8402	18.0953
+	4.36476	1.583	AT2G21250.1;AT2G21250.2;AT2G21260.2;AT2G21260.1	AT2G21250.1;AT2G21250.2	858	Color2 [DarkGray]	1	4					-1	7	7	7	29.4	29.4	29.4	35.01	0	94.807	1035800	16	23	14.8433	15.1273	14.9901	16.5559	16.5718	16.5821
+	1.43432	1.57242	AT2G45140.1;AT2G45140.2	AT2G45140.1;AT2G45140.2	1123	Color2 [DarkGray]	1	4					-1	3	3	3	20.5	20.5	20.5	26.442	0	85.141	458290	15	11	15.1075	13.3917	14.2232	15.9854	15.5808	15.8735
+	2.74678	1.57207	AT5G66280.1	AT5G66280.1	2838	Color2 [DarkGray]	1	4					-1	8	5	5	32.1	26	26	40.85	0	79.955	680180	20	16	15.0047	14.3845	14.3797	16.2559	16.1229	16.1064
+	2.68813	1.56895	AT4G39330.1;AT4G39330.2	AT4G39330.1;AT4G39330.2	2177	Color2 [DarkGray]	1	4					-1	7	7	7	35.8	35.8	35.8	38.933	0	181.25	2135100	20	34	16.3114	15.7582	16.4869	17.7431	17.7863	17.7339
+	1.67714	1.56647	AT2G41790.1	AT2G41790.1	1079	Color2 [DarkGray]	1	4					-1	4	4	4	6.2	6.2	6.2	110.99	0	107.11	521730	45	14	14.4171	13.4099	14.7733	15.9429	15.8108	15.546
+	2.92608	1.55095	AT1G16350.1	AT1G16350.1	192	Color2 [DarkGray]	1	4					-1	15	15	14	43	43	39.6	54.051	0	322.83	4502400	24	66	16.3094	15.9857	15.6684	17.5139	17.4944	17.6081
+	2.05636	1.53438	AT4G26300.4;AT4G26300.2;AT4G26300.3;AT4G26300.1;AT4G26300.5	AT4G26300.4;AT4G26300.2;AT4G26300.3;AT4G26300.1;AT4G26300.5	2003	Color2 [DarkGray]	1	4					-1	4	4	3	12.4	12.4	9.3	66.323	0	29.306	457770	34	12	14.1323	15.1332	14.2658	16.1792	15.9978	15.9574
+	1.26193	1.53333	AT5G54500.1;AT5G54500.2	AT5G54500.1;AT5G54500.2	2701	Color2 [DarkGray]	1	4					-1	1	1	1	7.4	7.4	7.4	21.796	0.0004268	9.8617	955960	9	11	14.2244	15.6278	16.1004	16.9976	16.6926	16.8623
+	0.856667	1.52544	AT4G02450.2;AT4G02450.1	AT4G02450.2;AT4G02450.1	1784	Color2 [DarkGray]	1	4					-1	4	4	4	18.3	18.3	18.3	25.341	0	49.632	793550	8	14	13.3794	15.6896	15.9599	16.7722	16.4538	16.3792
+	2.53982	1.52526	AT1G47128.1	AT1G47128.1	383	Color2 [DarkGray]	1	4					-1	2	2	2	11.9	11.9	11.9	50.966	0	18.191	331170	19	8	14.322	13.7094	13.7472	15.2815	15.6962	15.3766
+	5.0376	1.52301	AT5G02500.1;AT5G02500.2	AT5G02500.1;AT5G02500.2	2201	Color2 [DarkGray]	1	4					-1	50	50	22	75.7	75.7	42.9	71.357	0	323.31	91784000	37	292	20.2781	20.1529	20.2259	21.7778	21.6631	21.785
+	2.96393	1.52296	AT3G18060.1;AT2G01330.1	AT3G18060.1	1381	Color2 [DarkGray]	1	4					-1	12	12	12	30.7	30.7	30.7	66.041	0	103.15	1113600	34	33	14.396	14.1806	13.7832	15.6178	15.6855	15.6254
+	3.33303	1.5141	AT5G46070.1	AT5G46070.1	2596	Color2 [DarkGray]	1	4					-1	7	7	7	11.6	11.6	11.6	122.78	0	67.868	621450	60	25	14.0872	13.6369	14.034	15.432	15.392	15.4763
+	3.51071	1.51381	AT3G05420.2	AT3G05420.2	1220	Color2 [DarkGray]	1	4					-1	24	24	1	49.2	49.2	2.5	73.202	0	264.31	4716000	40	89	15.6165	15.699	15.2985	17.0317	17.1358	16.9879
+	1.96836	1.51069	AT1G67230.1	AT1G67230.1	579	Color2 [DarkGray]	1	4					-1	6	6	6	6.1	6.1	6.1	129.09	0	74.171	418440	54	12	13.7792	14.8445	14.6916	15.9958	15.8665	15.9851
+	2.25492	1.50981	AT1G60070.1;AT1G60070.2	AT1G60070.1;AT1G60070.2	504	Color2 [DarkGray]	1	4					-1	4	4	4	6.8	6.8	6.8	94.669	0	44.805	543150	41	11	14.4915	14.2585	15.1764	16.1007	16.2203	16.1348
+	1.59495	1.50834	AT1G71840.1	AT1G71840.1	626	Color2 [DarkGray]	1	4					-1	5	5	5	20.4	20.4	20.4	43.791	0	49.382	441080	14	15	13.4172	13.3466	14.6738	15.289	15.4152	15.2584
+	1.27277	1.50743	AT4G39080.1	AT4G39080.1	2170	Color2 [DarkGray]	1	4					-1	8	8	6	14.5	14.5	10.5	92.832	0	103.72	1825400	34	23	16.3059	16.3188	14.874	17.8963	17.13	16.9947
+	2.24103	1.49541	AT2G20850.1;AT2G20850.2	AT2G20850.1	851	Color2 [DarkGray]	1	4					-1	5	5	5	10.8	10.8	10.8	84.823	0	62.62	791680	35	16	14.026	14.9721	14.353	15.9328	15.9631	15.9415
+	3.98583	1.49115	AT2G27860.1	AT2G27860.1	929	Color2 [DarkGray]	1	4					-1	16	16	6	58.9	58.9	28.5	43.637	0	246.29	3777100	27	55	15.7523	15.9591	15.9535	17.4462	17.4502	17.2419
+	2.10058	1.47433	AT3G10520.1	AT3G10520.1	1284	Color2 [DarkGray]	1	4					-1	2	2	2	24.1	24.1	24.1	17.871	0	18.162	381520	9	9	14.5897	14.1601	14.1168	16.1217	15.2603	15.9075
+	1.48477	1.47206	AT5G27640.3;AT5G27640.1;AT5G27640.2;AT5G25780.1	AT5G27640.3;AT5G27640.1;AT5G27640.2;AT5G25780.1	2495	Color2 [DarkGray]	1	4					-1	8	8	8	18	18	18	81.874	0	77.044	941800	34	27	15.4717	13.9035	14.8648	16.2009	16.1412	16.3141
+	1.33596	1.46886	AT5G08100.1;AT5G08100.2	AT5G08100.1;AT5G08100.2	2264	Color2 [DarkGray]	1	4					-1	5	5	5	26	26	26	33.027	0	46.148	762800	14	17	15.1722	13.623	15.1532	16.051	16.1578	16.1462
+	6.16223	1.46076	AT3G09440.4;AT3G09440.3;AT3G09440.2;AT3G09440.1	AT3G09440.4;AT3G09440.3;AT3G09440.2;AT3G09440.1	1271	Color2 [DarkGray]	1	4					-1	40	21	18	68.7	42.8	33	71.147	0	323.31	23338000	37	85	19.4032	19.4457	19.3694	20.8782	20.8364	20.8859
+	1.69865	1.4385	AT1G51570.1;AT3G57880.4;AT3G57880.3;AT3G57880.2;AT3G57880.1	AT1G51570.1;AT3G57880.4;AT3G57880.3;AT3G57880.2;AT3G57880.1	428	Color2 [DarkGray]	1	4					-1	4	4	4	9.9	9.9	9.9	89.153	0	35.38	403090	32	12	13.4509	14.2051	14.7445	15.5598	15.7198	15.4364
+	1.98153	1.43313	AT5G16760.1	AT5G16760.1	2376	Color2 [DarkGray]	1	4					-1	4	4	4	21	21	21	36.219	0	32.099	267880	22	9	13.3639	14.4056	13.9359	15.1605	15.3682	15.4762
+	1.15703	1.43249	AT5G16070.1	AT5G16070.1	2364	Color2 [DarkGray]	1	4					-1	12	3	3	28.8	9.3	9.3	58.927	0	28.083	547940	29	13	15.4501	13.4388	14.3607	15.8614	15.8983	15.7874
+	1.70359	1.41365	AT3G27050.1	AT3G27050.1	1492	Color2 [DarkGray]	1	4					-1	4	4	4	35.2	35.2	35.2	20.611	0	56.303	359880	11	10	14.8242	13.5932	13.8848	15.6276	15.4296	15.486
+	1.65801	1.40476	AT2G20190.1	AT2G20190.1	838	Color2 [DarkGray]	1	4					-1	6	6	6	7.8	7.8	7.8	158.95	0	43.411	366620	73	11	13.6713	14.7129	13.4709	15.3446	15.4098	15.315
+	1.50154	1.39765	AT3G56190.1;AT3G56190.2;AT3G56450.1	AT3G56190.1;AT3G56190.2	1670	Color2 [DarkGray]	1	4					-1	8	8	8	44.6	44.6	44.6	32.755	0	70.535	724210	20	17	15.4927	14.7764	14.0977	16.49	16.0082	16.0615
+	0.835612	1.39211	AT5G28840.2;AT5G28840.1	AT5G28840.2;AT5G28840.1	2505	Color2 [DarkGray]	1	4					-1	6	6	6	27.9	27.9	27.9	42.758	0	88.515	1191800	23	18	13.8769	15.9113	16.3937	16.8493	16.822	16.6869
+	3.28789	1.39054	AT1G29250.1	AT1G29250.1	308	Color2 [DarkGray]	1	4					-1	3	3	3	43.8	43.8	43.8	14.574	0	45.128	372060	9	10	14.3192	13.9604	14.3866	15.5951	15.5688	15.6737
+	1.61238	1.39002	AT4G21180.2;AT4G21180.1	AT4G21180.2;AT4G21180.1	1936	Color2 [DarkGray]	1	4					-1	5	5	5	16.7	16.7	16.7	65.732	0	56.308	604130	30	13	14.0532	15.2671	15.1424	16.272	16.0438	16.3169
+	0.856524	1.38485	AT2G27720.1;AT2G27720.3;AT2G27720.2;AT2G27720.4	AT2G27720.1;AT2G27720.3;AT2G27720.2	927	Color2 [DarkGray]	1	4					-1	4	4	4	71.3	71.3	71.3	11.452	0	56.973	1288200	5	20	14.3108	16.6395	16.4433	17.0289	17.1677	17.3516
+	1.90196	1.38176	AT5G56760.1	AT5G56760.1	2734	Color2 [DarkGray]	1	4					-1	3	3	3	30.1	30.1	30.1	32.77	0	38.175	303110	13	10	14.3119	13.3443	14.2615	15.3253	15.2648	15.4729
+	3.96089	1.36262	AT5G27470.1	AT5G27470.1	2493	Color2 [DarkGray]	1	4					-1	8	8	8	29	29	29	51.628	0	163.77	1441000	28	32	15.1793	15.2341	15.1578	16.7001	16.3997	16.5592
+	3.52245	1.36078	AT4G13780.1	AT4G13780.1	1866	Color2 [DarkGray]	1	4					-1	6	6	6	12.8	12.8	12.8	89.853	0	54.748	1116000	46	20	15.4151	15.0762	15.408	16.6893	16.6922	16.6001
+	1.03372	1.3517	AT4G30920.1;AT4G30910.1;AT4G30910.2	AT4G30920.1	2062	Color2 [DarkGray]	1	4					-1	9	7	7	26.6	22.1	22.1	61.306	0	72.684	1421100	32	18	16.1271	14.2385	15.9675	16.5827	16.9125	16.8931
+	4.40083	1.35026	AT3G42050.1	AT3G42050.1	1524	Color2 [DarkGray]	1	4					-1	7	7	7	28.8	28.8	28.8	50.284	0	129.57	6174900	23	42	18.099	18.1414	18.0639	19.3223	19.5048	19.5279
+	5.76604	1.34864	AT3G55440.1	AT3G55440.1	1662	Color2 [DarkGray]	1	4					-1	13	13	13	68.5	68.5	68.5	27.169	0	216.38	6027200	14	63	17.0535	16.9901	17.0934	18.4003	18.3778	18.4049
+	1.36169	1.34719	AT3G52880.1;AT3G52880.2	AT3G52880.1;AT3G52880.2	1624	Color2 [DarkGray]	1	4					-1	4	4	4	20.3	20.3	20.3	46.487	0	47.998	393750	27	11	14.8395	13.5167	13.3992	15.2278	15.2999	15.2693
+	2.08402	1.33348	AT5G65460.6;AT5G65460.2;AT5G65460.4;AT5G65460.3;AT5G65460.1;AT5G65460.5	AT5G65460.6;AT5G65460.2;AT5G65460.4;AT5G65460.3;AT5G65460.1;AT5G65460.5	2824	Color2 [DarkGray]	1	4					-1	12	12	10	15.5	15.5	13.3	119.19	0	228.54	2139800	59	41	15.8995	15.7079	14.9999	16.8533	16.8544	16.9001
+	1.30873	1.33126	AT3G27530.1	AT3G27530.1	1502	Color2 [DarkGray]	1	4					-1	5	5	5	8.3	8.3	8.3	101.83	0	46.297	319120	51	10	14.7551	14.6341	13.2866	15.6861	15.4278	15.5557
+	2.61726	1.32266	AT3G12670.1	AT3G12670.1	1317	Color2 [DarkGray]	1	4					-1	6	6	6	16.2	16.2	16.2	64.303	0	79.165	758910	29	19	14.4213	14.2617	14.8973	15.8436	15.9107	15.794
+	5.03264	1.3107	AT1G09780.1	AT1G09780.1	122	Color2 [DarkGray]	1	4					-1	31	31	21	73.4	73.4	53.1	60.579	0	323.31	21061000	31	155	17.8454	17.7885	17.9305	19.2037	19.1616	19.1311
+	2.86474	1.31057	AT2G01470.1	AT2G01470.1	743	Color2 [DarkGray]	1	4					-1	7	7	6	27.5	27.5	24.9	42.793	0	46.778	557270	23	17	14.085	14.1637	13.641	15.2291	15.3264	15.2659
+	2.34089	1.31013	AT3G59970.3;AT3G59970.2;AT3G59970.1	AT3G59970.3;AT3G59970.2;AT3G59970.1	1710	Color2 [DarkGray]	1	4					-1	18	18	15	41.4	41.4	38.2	66.288	0	188.21	3428300	33	65	16.0365	15.7201	16.4683	17.2596	17.3899	17.5058
+	1.10426	1.30578	AT1G07140.1;AT5G58590.1	AT1G07140.1;AT5G58590.1	82	Color2 [DarkGray]	1	4					-1	2	2	2	14.5	14.5	14.5	25.601	0	24.387	331750	13	9	15.1009	14.1744	13.2195	15.3865	15.3201	15.7057
+	4.20335	1.30219	AT5G06600.1;AT5G06600.2;AT5G06600.3	AT5G06600.1;AT5G06600.2;AT5G06600.3	2255	Color2 [DarkGray]	1	4					-1	17	8	8	25.7	11.8	11.8	130.61	0	143.58	1701700	62	30	15.5262	15.6301	15.6547	16.8323	17.0316	16.8538
+	3.51809	1.29397	AT1G30230.1;AT1G30230.2	AT1G30230.1;AT1G30230.2	317	Color2 [DarkGray]	1	4					-1	6	6	4	31.2	31.2	27.7	25.132	0	48.11	2116200	11	21	16.2756	16.1978	16.241	17.6616	17.3174	17.6174
+	4.18836	1.29128	AT1G50480.1	AT1G50480.1	416	Color2 [DarkGray]	1	4					-1	11	11	11	41	41	41	67.801	0	172.76	2617000	28	41	15.8657	15.625	15.7112	17.0736	16.9994	17.0027
+	2.63056	1.28071	AT1G68530.1;AT1G68530.2	AT1G68530.1;AT1G68530.2	592	Color2 [DarkGray]	1	4					-1	2	2	2	7.6	7.6	7.6	56.395	0	18.866	438990	25	12	14.0648	14.5486	14.6126	15.7704	15.552	15.7458
+	1.128	1.27991	AT1G68790.1	AT1G68790.1	595	Color2 [DarkGray]	1	4					-1	11	11	11	16.1	16.1	16.1	127.2	0	240.92	882710	52	28	13.4106	14.0043	15.2004	15.3219	15.5098	15.6234
+	3.35747	1.27855	AT4G22880.3;AT4G22880.2;AT4G22880.1	AT4G22880.3;AT4G22880.2;AT4G22880.1	1951	Color2 [DarkGray]	1	4					-1	2	2	2	13.2	13.2	13.2	40.396	0	28.548	306820	19	8	14.4623	14.14	14.5134	15.6217	15.7044	15.6251
+	3.36868	1.27695	AT5G03630.1	AT5G03630.1	2214	Color2 [DarkGray]	1	4					-1	19	19	19	68	68	68	47.479	0	287.87	9549600	28	93	17.7615	17.4076	17.4807	18.9269	18.7871	18.7667
+	1.90398	1.27201	AT1G47900.2;AT1G47900.3;AT1G47900.1	AT1G47900.2;AT1G47900.3;AT1G47900.1	388	Color2 [DarkGray]	1	4					-1	4	3	3	7.5	6.3	6.3	118.25	0	41.193	216220	65	8	14.1964	13.6018	14.5683	15.2305	15.5275	15.4244
+	2.00994	1.27166	AT1G68910.3;AT1G68910.2;AT1G68910.1	AT1G68910.3;AT1G68910.2;AT1G68910.1	596	Color2 [DarkGray]	1	4					-1	6	6	6	15.1	15.1	15.1	66.439	0	63.158	471600	31	11	14.2673	14.1195	15.0063	15.7489	15.7279	15.7313
+	4.40778	1.26879	AT3G66658.1;AT3G66658.2	AT3G66658.1;AT3G66658.2	1755	Color2 [DarkGray]	1	4					-1	3	3	3	9.9	9.9	9.9	61.018	0	29.738	369810	23	9	14.2107	14.3807	14.3836	15.6067	15.5372	15.6375
+	1.52698	1.26458	AT5G20070.1	AT5G20070.1	2424	Color2 [DarkGray]	1	4					-1	2	2	2	8.4	8.4	8.4	48.347	0	15.577	287810	20	7	13.5206	13.9344	14.5285	15.7312	15.1441	14.902
+	3.34274	1.2589	AT5G19485.1	AT5G19485.1	2412	Color2 [DarkGray]	1	4					-1	3	3	3	11.2	11.2	11.2	49.036	0	50.025	335080	21	11	14.1403	13.9191	14.1791	15.4888	15.186	15.3404
+	2.3078	1.25779	AT1G01320.2;AT1G01320.3;AT1G01320.1	AT1G01320.2;AT1G01320.3;AT1G01320.1	4	Color2 [DarkGray]	1	4					-1	19	19	15	20.6	20.6	16.8	197.5	0	286.59	2361500	82	55	15.5027	16.1881	15.9981	17.3297	17.0233	17.1093
+	4.90945	1.21559	PafA|BAIT|BAIT_LABEL	PafA|BAIT|BAIT_LABEL	2901	Color2 [DarkGray]	1	4					-1	42	42	42	91.7	91.7	91.7	53.8	0	323.31	239710000	26	451	20.9992	20.893	20.9589	22.101	22.217	22.1798
+	2.30433	1.20284	AT1G54100.2;AT1G54100.1	AT1G54100.2;AT1G54100.1	467	Color2 [DarkGray]	1	4					-1	3	3	3	10.8	10.8	10.8	54.208	0	40.42	313720	24	10	13.5307	14.1938	14.1263	15.1194	15.1071	15.2328
+	3.03373	1.19691	AT1G50710.1	AT1G50710.1	421	Color2 [DarkGray]	1	4					-1	5	5	5	23.4	23.4	23.4	47.769	0	38.356	529030	17	12	14.3594	14.7733	14.6304	15.8998	15.6878	15.7663
+	1.9276	1.18871	AT3G28300.1;AT3G28290.1	AT3G28300.1;AT3G28290.1	1508	Color2 [DarkGray]	1	4					-1	5	5	5	17.9	17.9	17.9	42.954	0	48.462	470850	18	16	13.7015	14.639	14.1979	15.3895	15.3615	15.3535
+	1.10337	1.18479	AT5G64460.8;AT5G64460.6;AT5G64460.4;AT5G64460.3;AT5G64460.2;AT5G64460.10;AT5G64460.1;AT5G64460.5;AT5G64460.9;AT5G64460.7;AT5G64460.11	AT5G64460.8;AT5G64460.6;AT5G64460.4;AT5G64460.3;AT5G64460.2;AT5G64460.10;AT5G64460.1	2813	Color2 [DarkGray]	1	4					-1	3	3	3	16.7	16.7	16.7	31.599	0	77.302	380290	15	11	13.818	14.1119	15.4487	15.6254	15.5584	15.7492
+	1.34888	1.18162	AT1G11330.3;AT1G11330.1;AT1G11330.2	AT1G11330.3;AT1G11330.1;AT1G11330.2	142	Color2 [DarkGray]	1	4					-1	2	2	2	4.1	4.1	4.1	84.049	0	20.568	314570	42	9	15.014	13.7441	14.0195	15.7159	15.3179	15.2886
+	3.05683	1.18088	AT1G04690.1	AT1G04690.1	49	Color2 [DarkGray]	1	4					-1	4	4	4	23.5	23.5	23.5	36.538	0	161.14	1892400	19	16	16.7637	16.7616	16.8018	17.7828	18.2154	17.8716
+	1.64557	1.17603	AT1G07110.1	AT1G07110.1	81	Color2 [DarkGray]	1	4					-1	2	2	2	6.5	6.5	6.5	82.558	0	16.858	137260	38	6	14.4453	13.3835	13.9116	15.3116	14.9832	14.9736
+	2.64523	1.16558	AT3G48720.1;AT5G63560.1	AT3G48720.1	1571	Color2 [DarkGray]	1	4					-1	4	4	4	12.8	12.8	12.8	48.004	0	37.102	362200	21	11	14.3806	14.5906	14.0523	15.6247	15.4241	15.4714
+	1.50129	1.16486	AT2G37080.3;AT2G37080.2;AT2G37080.1	AT2G37080.3;AT2G37080.2;AT2G37080.1	1019	Color2 [DarkGray]	1	4					-1	2	2	2	6.5	6.5	6.5	65.616	0	93.302	189600	36	8	14.574	14.4407	13.4371	15.3327	15.3181	15.2956
+	4.82336	1.16076	AT1G79550.2;AT1G79550.1	AT1G79550.2;AT1G79550.1	717	Color2 [DarkGray]	1	4					-1	17	17	16	67.3	67.3	67.3	42.131	0	317.21	12396000	25	103	17.5156	17.3792	17.3987	18.562	18.5891	18.6247
+	1.38699	1.15837	AT4G16340.2;AT4G16340.1	AT4G16340.2;AT4G16340.1	1898	Color2 [DarkGray]	1	4					-1	6	6	6	5.3	5.3	5.3	206.83	0	69.462	423120	94	13	13.9687	14.1517	15.2179	15.6142	15.5851	15.6141
+	1.27053	1.15378	AT1G49760.2;AT1G49760.1	AT1G49760.2;AT1G49760.1	409	Color2 [DarkGray]	1	4					-1	8	8	7	20.6	20.6	17	72.779	0	60.312	543530	31	17	14.259	13.8142	15.2352	15.4459	15.6382	15.6857
+	4.7529	1.15248	AT3G18000.1	AT3G18000.1	1380	Color2 [DarkGray]	1	4					-1	29	29	22	65.4	65.4	50.7	56.102	0	323.31	46269000	34	174	19.5156	19.3681	19.4713	20.5669	20.6331	20.6124
+	4.59948	1.14682	AT1G07890.6;AT1G07890.8;AT1G07890.7;AT1G07890.5;AT1G07890.4;AT1G07890.3;AT1G07890.2;AT1G07890.1	AT1G07890.6;AT1G07890.8;AT1G07890.7;AT1G07890.5;AT1G07890.4;AT1G07890.3;AT1G07890.2;AT1G07890.1	95	Color2 [DarkGray]	1	4					-1	12	12	12	57	57	57	27.52	0	320.16	7961900	14	63	17.6058	17.455	17.4465	18.6376	18.6552	18.655
+	2.45268	1.14503	AT1G64440.1	AT1G64440.1	550	Color2 [DarkGray]	1	4					-1	4	4	4	14.9	14.9	14.9	38.123	0	28.292	389460	16	12	13.9976	14.2334	14.2929	15.0067	15.5524	15.3999
+	3.04025	1.14298	AT5G49360.1	AT5G49360.1	2638	Color2 [DarkGray]	1	4					-1	2	2	2	5	5	5	83.523	0	30.272	253330	43	9	13.9526	14.1562	14.1719	15.3017	15.0244	15.3834
+	4.16579	1.14214	AT1G63770.7;AT1G63770.4;AT1G63770.6;AT1G63770.5;AT1G63770.3;AT1G63770.2;AT1G63770.1	AT1G63770.7;AT1G63770.4;AT1G63770.6;AT1G63770.5;AT1G63770.3;AT1G63770.2;AT1G63770.1	538	Color2 [DarkGray]	1	4					-1	15	15	15	34.8	34.8	34.8	99.157	0	172.58	2484800	49	59	16.0148	15.843	15.7969	17.0402	17.0259	17.0149
+	1.16721	1.13742	AT1G67680.1;AT1G67650.1	AT1G67680.1	583	Color2 [DarkGray]	1	4					-1	4	4	4	13.9	13.9	13.9	73.069	0	26.782	243570	30	9	13.5345	14.0372	15.0881	15.3235	15.3503	15.3983
+	2.32689	1.13666	AT3G02260.2;AT3G02260.3;AT3G02260.4;AT3G02260.1	AT3G02260.2;AT3G02260.3;AT3G02260.4;AT3G02260.1	1175	Color2 [DarkGray]	1	4					-1	12	12	12	3.7	3.7	3.7	565.6	0	165.71	1194600	258	40	15.1608	15.4415	14.7628	16.3249	16.2341	16.216
+	3.37472	1.13166	AT5G19320.2;AT5G19320.1	AT5G19320.2;AT5G19320.1	2409	Color2 [DarkGray]	1	4					-1	6	6	6	17.2	17.2	17.2	59.651	0	40.984	269460	29	10	14.1989	14.1341	14.4654	15.3509	15.447	15.3955
+	1.17578	1.12885	AT4G09570.1;AT5G23580.1;AT1G35670.1	AT4G09570.1;AT5G23580.1;AT1G35670.1	1822	Color2 [DarkGray]	1	4					-1	2	2	2	7	7	7	56.416	0	33.258	473700	24	10	14.6875	15.4252	13.8953	15.9661	15.6456	15.7828
+	3.6742	1.12334	AT4G31490.3;AT4G31490.2;AT4G31490.1	AT4G31490.3;AT4G31490.2;AT4G31490.1	2069	Color2 [DarkGray]	1	4					-1	10	10	2	18.8	18.8	4.7	106.08	0	188.77	1200600	42	37	15.0966	14.8027	14.9192	16.0942	16.0299	16.0645
+	2.2234	1.09985	AT4G23920.1;AT1G12780.1	AT4G23920.1;AT1G12780.1	1966	Color2 [DarkGray]	1	4					-1	4	4	3	12.9	12.9	9.7	38.382	0	30.415	241910	15	9	13.5822	14.1785	13.5482	14.8207	14.8733	14.9144
+	1.33155	1.08827	AT2G03760.1	AT2G03760.1	758	Color2 [DarkGray]	1	4					-1	3	3	3	15	15	15	37.139	0	42.159	384370	18	11	14.9972	14.641	13.7181	15.5972	15.4883	15.5356
+	3.5534	1.08377	AT5G16730.1	AT5G16730.1	2374	Color2 [DarkGray]	1	4					-1	36	36	34	45.1	45.1	42.9	96.207	0	323.31	9388200	49	145	16.9876	16.7826	16.8231	17.9715	17.8251	18.0481
+	2.43894	1.07307	AT5G64830.1;AT5G64830.3;AT5G64830.2	AT5G64830.1;AT5G64830.3;AT5G64830.2	2815	Color2 [DarkGray]	1	4					-1	3	3	3	15	15	15	42.656	0	31.118	251870	20	9	14.1606	14.007	13.6468	15.0468	14.8447	15.1422
+	2.46003	1.06747	AT5G61970.1	AT5G61970.1	2778	Color2 [DarkGray]	1	4					-1	8	8	8	23.5	23.5	23.5	68.832	0	60.096	488770	36	21	13.8794	14.4643	14.1669	15.3083	15.2006	15.2041
+	3.45013	1.06286	AT4G23670.1;AT4G14060.1	AT4G23670.1	1961	Color2 [DarkGray]	1	4					-1	10	10	9	70.9	70.9	58.9	17.518	0	205.97	10547000	9	56	18.7699	18.8478	18.6664	19.7529	19.7389	19.9809
+	5.25965	1.05251	AT1G57720.2;AT1G57720.1	AT1G57720.2;AT1G57720.1	493	Color2 [DarkGray]	1	4					-1	13	13	6	43.1	43.1	20.8	46.4	0	171.48	8639700	18	60	18.4178	18.4654	18.4815	19.5172	19.4575	19.5475
+	1.3725	1.04972	ATCG01130.1;ATCG01000.1	ATCG01130.1	2887	Color2 [DarkGray]	1	4					-1	17	17	17	11.5	11.5	11.5	213.69	0	116.41	1794700	99	47	15.8765	14.6627	15.1406	16.291	16.1765	16.3614
+	1.29637	1.04516	AT5G16300.3;AT5G16300.2;AT5G16300.4;AT5G16300.1	AT5G16300.3;AT5G16300.2;AT5G16300.4;AT5G16300.1	2369	Color2 [DarkGray]	1	4					-1	4	4	4	6	6	6	114.86	0	33.595	445700	59	14	15.1142	14.1521	15.2768	15.8594	16.1505	15.6687
+	2.56953	1.04444	AT4G23460.1;AT4G11380.1;AT4G11380.2;AT4G23460.2	AT4G23460.1;AT4G11380.1;AT4G11380.2	1957	Color2 [DarkGray]	1	4					-1	3	3	3	6.3	6.3	6.3	99.096	0	68.811	222320	44	9	13.6729	14.1751	13.7736	14.9609	14.8457	14.9483
+	2.5433	1.02562	AT1G05500.1;AT1G05500.2	AT1G05500.1;AT1G05500.2	61	Color2 [DarkGray]	1	4					-1	3	3	3	10.5	10.5	10.5	62.928	0	21.387	219820	27	9	13.5173	14.0195	13.8909	14.7487	14.8516	14.9044
+	3.69645	1.00978	AT3G02530.1	AT3G02530.1	1179	Color2 [DarkGray]	1	4					-1	13	13	4	28.8	28.8	9.3	58.949	0	195.72	4428200	29	60	17.0721	16.8153	16.9789	17.9772	17.9268	17.9916
+	4.2241	0.991303	AT3G48690.1;AT3G48700.1	AT3G48690.1	1570	Color2 [DarkGray]	1	4					-1	6	6	6	29	29	29	35.567	0	61.893	762610	14	22	14.7269	14.7413	14.63	15.6046	15.747	15.7206
+	2.23158	0.988363	AT3G11710.1	AT3G11710.1	1298	Color2 [DarkGray]	1	4					-1	5	5	5	15.2	15.2	15.2	70.887	0	40.105	353100	33	13	14.0138	14.2665	14.1907	15.438	14.8536	15.1444
+	4.18634	0.987815	AT1G73600.2;AT1G73600.1	AT1G73600.2;AT1G73600.1	647	Color2 [DarkGray]	1	4					-1	12	11	11	34.3	31.5	31.5	57.843	0	244.56	6576400	28	50	17.1237	17.2299	17.283	18.1371	18.2456	18.2175
+	2.43968	0.986477	AT1G77460.4;AT1G77460.3;AT1G77460.2;AT1G77460.1	AT1G77460.4;AT1G77460.3;AT1G77460.2;AT1G77460.1	693	Color2 [DarkGray]	1	4					-1	6	6	6	4.6	4.6	4.6	231.43	0	38.381	232110	109	10	13.8978	14.0441	14.135	15.0166	15.2626	14.7571
+	2.63446	0.982388	AT3G08530.1	AT3G08530.1	1259	Color2 [DarkGray]	1	4					-1	24	24	7	25.3	25.3	9.7	193.27	0	323.31	5139300	88	82	17.4418	17.0293	17.4539	18.2904	18.3405	18.2413
+	5.40551	0.974003	AT1G79940.4;AT1G79940.3;AT1G79940.2;AT1G79940.1	AT1G79940.4;AT1G79940.3;AT1G79940.2;AT1G79940.1	724	Color2 [DarkGray]	1	4					-1	5	5	5	15	15	15	66.487	0	85.987	875700	32	22	14.9304	14.8712	14.8362	15.8512	15.8606	15.8481
+	3.85143	0.973355	AT4G35830.1;AT4G35830.2	AT4G35830.1;AT4G35830.2	2137	Color2 [DarkGray]	1	4					-1	10	7	7	22.2	18.5	18.5	98.151	0	97.319	1501000	42	28	15.8023	15.636	15.773	16.6224	16.7373	16.7717
+	2.44007	0.960075	AT3G08590.2;AT3G08590.1	AT3G08590.2;AT3G08590.1	1261	Color2 [DarkGray]	1	4					-1	21	11	11	60.5	40.5	40.5	60.763	0	323.31	2299100	32	44	16.328	16.0159	16.2576	17.212	17.3476	16.9221
+	1.93594	0.943116	AT5G13530.2;AT5G13530.1	AT5G13530.2;AT5G13530.1	2332	Color2 [DarkGray]	1	4					-1	10	10	10	10.8	10.8	10.8	178.08	0	110.15	452810	83	19	13.6469	13.8594	14.3438	14.923	14.9724	14.784
+	3.95265	0.942081	AT5G36230.1;AT5G36230.2	AT5G36230.1;AT5G36230.2	2515	Color2 [DarkGray]	1	4					-1	6	6	5	18.2	18.2	15.8	47.215	0	203.51	1715500	24	24	16.7524	16.6639	16.8764	17.7169	17.7138	17.6882
+	2.95362	0.938034	AT5G16440.1	AT5G16440.1	2370	Color2 [DarkGray]	1	4					-1	5	3	3	24.4	15.8	15.8	33.214	0	64.875	1622900	18	13	16.9323	17.1012	17.3099	18.0779	18.0026	18.077
+	3.01077	0.93333	AT3G11130.1	AT3G11130.1	1290	Color2 [DarkGray]	1	4					-1	22	5	5	21.7	6.1	6.1	193.24	0	45.811	693010	88	18	15.0454	14.9455	15.3059	16.0386	16.0415	16.0167
+	3.98268	0.930899	AT2G30110.1	AT2G30110.1	944	Color2 [DarkGray]	1	4					-1	11	11	10	18.5	18.5	16.7	120.25	0	118.69	2283000	59	51	15.7084	15.8098	15.9131	16.7499	16.7582	16.7159
+	3.52801	0.930825	AT5G43940.1;AT5G43940.2	AT5G43940.1;AT5G43940.2	2582	Color2 [DarkGray]	1	4					-1	6	6	6	35.4	35.4	35.4	40.698	0	151.73	1667600	20	32	15.9264	15.7064	15.9007	16.7673	16.7145	16.8441
+	2.18144	0.92672	AT3G44320.1	AT3G44320.1	1530	Color2 [DarkGray]	1	4					-1	6	4	4	33.5	22.8	22.8	38.022	0	68.801	1983300	21	23	16.7911	16.3081	16.315	17.5504	17.3644	17.2796
+	2.90079	0.924264	AT2G46280.2;AT2G46280.1;AT2G46280.3;AT2G46290.1	AT2G46280.2;AT2G46280.1;AT2G46280.3	1131	Color2 [DarkGray]	1	4					-1	11	11	11	55.5	55.5	55.5	36.388	0	112.61	2060200	17	40	16.4746	16.1449	16.2633	17.1946	17.1274	17.3336
+	4.60822	0.922382	AT5G14740.9;AT5G14740.8;AT5G14740.7;AT5G14740.6;AT5G14740.2;AT5G14740.1;AT5G14740.5;AT5G14740.4;AT5G14740.3	AT5G14740.9;AT5G14740.8;AT5G14740.7;AT5G14740.6;AT5G14740.2;AT5G14740.1;AT5G14740.5;AT5G14740.4;AT5G14740.3	2351	Color2 [DarkGray]	1	4					-1	24	24	15	76.1	76.1	50.2	28.344	0	323.31	80500000	14	182	20.4185	20.4704	20.4859	21.399	21.3106	21.4324
+	6.28109	0.914225	AT5G65020.1;AT5G65020.2	AT5G65020.1;AT5G65020.2	2819	Color2 [DarkGray]	1	4					-1	12	12	12	50.5	50.5	50.5	36.266	0	320.88	9142600	19	68	17.8695	17.8358	17.8754	18.7554	18.7874	18.7807
+	2.30977	0.904844	AT3G26450.1	AT3G26450.1	1485	Color2 [DarkGray]	1	4					-1	6	6	5	61.8	61.8	53.3	17.791	0	137.09	1439400	8	25	15.9476	15.6944	16.1754	16.7991	16.7318	17.001
+	3.04922	0.899762	AT1G62380.1	AT1G62380.1	526	Color2 [DarkGray]	1	4					-1	5	5	5	34.4	34.4	34.4	36.183	0	138.59	1243300	13	17	16.4982	16.8035	16.5579	17.5913	17.4547	17.5129
+	4.86147	0.898531	AT1G65930.1;AT1G54340.1;AT1G54340.2;AT5G14590.1	AT1G65930.1	564	Color2 [DarkGray]	1	4					-1	18	18	18	46.6	46.6	46.6	45.746	0	271.79	5012100	25	61	17.2916	17.2504	17.2646	18.225	18.1661	18.1111
+	3.72102	0.896272	AT1G09620.1	AT1G09620.1	118	Color2 [DarkGray]	1	4					-1	11	11	11	18.3	18.3	18.3	123.45	0	138.99	2182100	53	42	15.8441	15.8729	16.0394	16.8108	16.8692	16.7653
+	2.43123	0.889689	AT5G65430.2;AT5G65430.1;AT5G65430.3	AT5G65430.2;AT5G65430.1;AT5G65430.3	2823	Color2 [DarkGray]	1	4					-1	6	5	4	34.1	30.1	25.2	27.771	0	166.05	1378100	16	24	15.5198	15.7418	15.2434	16.3627	16.4423	16.3691
+	2.30793	0.8837	AT3G09200.1;AT3G11250.1;AT3G09200.2;AT2G40010.1	AT3G09200.1;AT3G11250.1;AT3G09200.2;AT2G40010.1	1267	Color2 [DarkGray]	1	4					-1	10	10	10	35	35	35	34.133	0	86.524	2431800	9	30	16.5502	16.733	17.0616	17.7554	17.5908	17.6498
+	2.52389	0.87251	AT2G47610.1	AT2G47610.1	1146	Color2 [DarkGray]	1	4					-1	5	5	1	22.6	22.6	7.8	29.129	0	113.89	7515900	11	38	18.3342	18.691	18.7324	19.3614	19.5157	19.4981
+	3.93415	0.871768	AT5G20280.1	AT5G20280.1	2426	Color2 [DarkGray]	1	4					-1	3	3	3	4.8	4.8	4.8	117.32	0	44.878	643020	46	16	15.1883	15.2805	15.3364	16.0735	16.1381	16.209
+	4.20458	0.850379	AT1G04410.1	AT1G04410.1	46	Color2 [DarkGray]	1	4					-1	14	14	8	67.2	67.2	50	35.571	0	238.81	20268000	18	71	19.4657	19.5095	19.3838	20.3644	20.2582	20.2875
+	3.02643	0.847968	AT2G36460.1;AT2G36460.3;AT2G36460.2	AT2G36460.1;AT2G36460.3;AT2G36460.2	1008	Color2 [DarkGray]	1	4					-1	22	13	13	74.3	43.6	43.6	38.386	0	300.93	9511000	23	69	17.6974	17.6915	17.9446	18.538	18.6304	18.7089
+	3.04849	0.845995	AT3G23530.1;AT3G23510.1	AT3G23530.1;AT3G23510.1	1447	Color2 [DarkGray]	1	4					-1	5	5	5	10.8	10.8	10.8	98.061	0	85.953	963140	46	25	15.5598	15.3877	15.396	16.4146	16.317	16.15
+	3.60314	0.827237	AT1G30630.1;AT2G34840.2;AT2G34840.1	AT1G30630.1	325	Color2 [DarkGray]	1	4					-1	5	5	5	31.5	31.5	31.5	32.602	0	103.29	2049800	15	21	16.9564	16.9336	17.0437	17.8064	17.9052	17.7037
+	4.22312	0.827047	AT1G63660.1;AT1G63660.2	AT1G63660.1;AT1G63660.2	537	Color2 [DarkGray]	1	4					-1	12	12	11	36.7	36.7	36.5	59.314	0	277.22	3556500	32	54	16.6193	16.616	16.5939	17.4444	17.5124	17.3535
+	3.48314	0.8215	AT3G43300.2;AT3G43300.3;AT3G43300.1	AT3G43300.2;AT3G43300.3;AT3G43300.1	1526	Color2 [DarkGray]	1	4					-1	20	20	20	19.4	19.4	19.4	191.45	0	323.31	7576800	103	93	17.2536	17.0862	17.2963	17.9942	18.0964	18.01
+	3.65349	0.819729	AT1G12000.1;AT4G04040.1	AT1G12000.1	151	Color2 [DarkGray]	1	4					-1	11	11	11	33.9	33.9	33.9	61.459	0	206.04	2501000	27	42	16.3852	16.4811	16.5122	17.3819	17.2431	17.2127
+	4.0766	0.809506	AT2G36530.1;AT2G36530.2	AT2G36530.1;AT2G36530.2	1009	Color2 [DarkGray]	1	4					-1	18	18	18	68.2	68.2	68.2	47.719	0	283.38	7646600	25	77	17.4476	17.4608	17.5423	18.2511	18.255	18.3731
+	4.58738	0.800764	AT5G41950.1	AT5G41950.1	2558	Color2 [DarkGray]	1	4					-1	7	7	7	21.1	21.1	21.1	62.397	0	74.6	900480	28	23	15.3198	15.3067	15.3366	16.1889	16.1088	16.0677
+	4.19734	-0.798462	AT1G48830.2;AT1G48830.1	AT1G48830.2;AT1G48830.1	400	Color2 [DarkGray]	1	4					-1	15	15	15	67	67	67	21.922	0	213.24	17841000	8	76	20.184	20.258	20.2169	19.4991	19.3632	19.4012
+	3.80817	-0.834657	AT3G14840.2;AT1G53420.1	AT3G14840.2	1343	Color2 [DarkGray]	1	4					-1	17	17	14	19.2	19.2	16.3	112.28	0	317.95	8339800	52	86	19.2652	19.1415	19.0752	18.3698	18.3134	18.2947
+	3.94951	-0.851515	AT1G21170.1;AT1G21170.2	AT1G21170.1;AT1G21170.2	247	Color2 [DarkGray]	1	4					-1	13	8	8	18	10.8	10.8	122.67	0	95.332	1614000	60	45	16.6026	16.5316	16.6474	15.6977	15.8328	15.6965
+	3.39673	-0.860257	AT1G48480.1	AT1G48480.1	395	Color2 [DarkGray]	1	4					-1	6	6	6	16.5	16.5	16.5	71.13	0	66.031	2376400	34	37	17.1542	17.3039	17.3031	16.5095	16.3017	16.3694
+	2.43281	-0.862066	AT3G47450.2;AT3G47450.1	AT3G47450.2;AT3G47450.1	1557	Color2 [DarkGray]	1	4					-1	9	9	9	26.6	26.6	26.6	61.957	0	84.922	2432900	30	41	17.342	17.5843	17.5643	16.7876	16.7153	16.4014
+	3.39562	-0.876757	AT5G59850.1;AT1G07770.3;AT1G07770.2;AT1G07770.1;AT2G39590.1	AT5G59850.1;AT1G07770.3;AT1G07770.2;AT1G07770.1	90	Color2 [DarkGray]	1	4					-1	6	6	3	46.9	46.9	24.6	14.804	0	148.67	13167000	8	72	19.5982	19.7318	19.7247	18.8821	18.8693	18.6729
+	4.11407	-0.884793	AT4G24100.2;AT4G24100.3;AT4G24100.1;AT4G24100.4	AT4G24100.2;AT4G24100.3;AT4G24100.1;AT4G24100.4	1967	Color2 [DarkGray]	1	4					-1	6	6	6	11.6	11.6	11.6	76.666	0	66.755	1208900	39	22	16.8122	16.7945	16.6971	15.8059	15.9075	15.936
+	2.68403	-0.890937	AT5G16590.1	AT5G16590.1	2372	Color2 [DarkGray]	1	4					-1	13	9	9	28.3	20.2	20.2	67.463	0	233.45	2057100	41	33	17.6297	17.2942	17.5689	16.7415	16.5786	16.4999
+	2.50501	-0.892781	AT4G23250.1;AT4G23250.3;AT4G23250.2	AT4G23250.1;AT4G23250.3;AT4G23250.2	1954	Color2 [DarkGray]	1	4					-1	2	2	2	5	5	5	76.353	0	21.891	230480	41	10	14.9339	15.1001	14.8415	14.3019	13.9404	13.9549
+	2.52401	-0.910866	AT4G31880.2;AT4G31880.1	AT4G31880.2;AT4G31880.1	2077	Color2 [DarkGray]	1	4					-1	6	6	6	12.2	12.2	12.2	94.08	0	82.033	865090	45	18	17.1198	16.9827	17.1077	16.2899	16.2975	15.8902
+	2.97113	-0.917707	AT1G30360.1	AT1G30360.1	318	Color2 [DarkGray]	1	4					-1	6	6	6	11.9	11.9	11.9	81.934	0	109.2	1373900	40	20	16.8507	17.0233	16.81	15.824	16.1235	15.9836
+	2.97344	-0.927563	AT4G21450.3;AT4G21450.1;AT4G21450.2	AT4G21450.3;AT4G21450.1;AT4G21450.2	1938	Color2 [DarkGray]	1	4					-1	4	4	4	20.4	20.4	20.4	35.187	0	53.444	2292100	15	23	18.104	18.3452	18.1017	17.3706	17.118	17.2796
+	2.24713	-0.927914	AT4G29520.1	AT4G29520.1	2048	Color2 [DarkGray]	1	4					-1	13	13	13	43.1	43.1	43.1	34.363	0	239.61	8015300	14	64	18.8303	19.1597	19.0117	18.2812	18.137	17.7997
+	2.8174	-0.930073	AT3G02880.1	AT3G02880.1	1187	Color2 [DarkGray]	1	4					-1	14	14	10	33.5	33.5	25.4	67.752	0	146.62	3084500	38	55	17.6743	17.4274	17.669	16.516	16.6419	16.8226
+	5.07488	-0.934751	ATCG00680.1	ATCG00680.1	2872	Color2 [DarkGray]	1	4					-1	6	6	6	16.5	16.5	16.5	56.036	0	83.558	3843200	14	39	18.043	17.9614	18.0621	17.0815	17.0751	17.1056
+	1.98991	-0.939205	AT5G24490.1	AT5G24490.1	2471	Color2 [DarkGray]	1	4					-1	4	4	4	26.6	26.6	26.6	34.856	0	110.1	2561000	10	25	17.3714	17.827	17.8655	16.9635	16.7695	16.5133
+	2.4557	-0.946112	AT3G04950.1	AT3G04950.1	1214	Color2 [DarkGray]	1	4					-1	2	2	2	18.6	18.6	18.6	25.61	0	39.73	608300	11	12	16.5084	16.3822	16.652	15.7783	15.6014	15.3246
+	2.46728	-0.953885	AT4G38630.1	AT4G38630.1	2165	Color2 [DarkGray]	1	4					-1	4	4	4	18.7	18.7	18.7	40.757	0	196.15	2489000	14	20	18.391	18.1381	17.9014	17.1241	17.3089	17.1358
+	1.74522	-0.955739	AT1G16210.1	AT1G16210.1	191	Color2 [DarkGray]	1	4					-1	6	6	6	29.9	29.9	29.9	26.826	0	91.475	2166200	12	28	16.7913	17.5188	17.2645	16.4587	16.2208	16.0278
+	2.86657	-0.960836	AT1G31970.1	AT1G31970.1	338	Color2 [DarkGray]	1	4					-1	9	9	9	23.5	23.5	23.5	59.603	0	113.46	2800100	31	30	17.6878	18.0681	17.971	16.8978	17.0277	16.9189
+	1.58301	-0.971035	AT5G42950.1	AT5G42950.1	2571	Color2 [DarkGray]	1	4					-1	4	4	4	3.2	3.2	3.2	187.62	0	32.946	405390	83	16	14.7219	15.5582	15.2048	14.1439	13.9686	14.4592
+	2.95266	-0.97161	AT3G59920.1	AT3G59920.1	1709	Color2 [DarkGray]	1	4					-1	11	11	7	46.4	46.4	29.7	49.538	0	176.81	2659400	23	47	17.2905	16.9028	17.1178	16.1143	16.0912	16.1907
+	5.00921	-0.980021	AT2G18960.1;AT2G18960.3;AT2G18960.2;AT2G07560.1;AT2G24520.4;AT2G24520.3;AT2G24520.1;AT2G24520.2;AT1G17260.1	AT2G18960.1;AT2G18960.3;AT2G18960.2	820	Color2 [DarkGray]	1	4					-1	54	17	16	53.3	21.2	20.2	104.22	0	323.31	22537000	50	83	20.5522	20.6205	20.6375	19.609	19.5918	19.6693
+	2.20454	-0.987443	AT5G14720.2;AT5G14720.1	AT5G14720.2;AT5G14720.1	2350	Color2 [DarkGray]	1	4					-1	13	13	13	28.5	28.5	28.5	75.363	0	147.17	2223400	34	49	17.6844	17.5592	17.4671	16.7706	16.2295	16.7483
+	3.51678	-0.988815	AT3G46040.1	AT3G46040.1	1548	Color2 [DarkGray]	1	4					-1	5	2	2	46.2	23.8	23.8	14.774	0	75.889	2510000	8	13	18.2906	18.4881	18.2288	17.3786	17.3792	17.2833
+	2.47626	-0.991662	AT1G74060.1;AT1G74050.1	AT1G74060.1;AT1G74050.1	652	Color2 [DarkGray]	1	4					-1	8	1	1	23.6	7.7	7.7	26.008	0	25.615	455090	11	9	15.3826	15.2404	15.4609	14.6294	14.3512	14.1284
+	2.17728	-0.9989	AT1G62850.4;AT1G62850.3;AT1G62850.2	AT1G62850.4;AT1G62850.3;AT1G62850.2	532	Color2 [DarkGray]	1	4					-1	4	4	4	22.3	22.3	22.3	22.71	0	195.18	2715100	12	15	18.4716	18.7655	18.7783	17.9619	17.6671	17.3898
+	3.06234	-1.00679	AT3G06270.1	AT3G06270.1	1229	Color2 [DarkGray]	1	4					-1	15	15	15	64.7	64.7	64.7	38.329	0	323.31	7048100	17	75	18.4908	18.1823	18.3884	17.2268	17.4575	17.3569
+	1.99571	-1.02025	AT2G04520.1	AT2G04520.1	765	Color2 [DarkGray]	1	4					-1	7	7	4	44.1	44.1	26.2	16.637	0	128.07	17289000	7	54	20.6261	21.0348	20.8959	19.9376	20.09	19.4684
+	2.00695	-1.02098	AT2G24060.1	AT2G24060.1	881	Color2 [DarkGray]	1	4					-1	3	2	2	17.3	13.1	13.1	35.141	0	31.446	964610	14	13	16.7627	17.2356	17.3008	16.2643	16.1705	15.8013
+	5.43366	-1.02964	AT5G62670.1;AT3G47950.2;AT3G47950.1	AT5G62670.1;AT3G47950.2;AT3G47950.1	2787	Color2 [DarkGray]	1	4					-1	33	22	17	37.3	26.9	22.9	105.12	0	323.31	24864000	47	120	20.9784	20.9809	21.0216	19.9911	19.9873	19.9136
+	1.69186	-1.04283	AT4G35470.2;AT4G35470.1	AT4G35470.2;AT4G35470.1	2131	Color2 [DarkGray]	1	4					-1	12	12	12	33.1	33.1	33.1	59.881	0	104.06	1857500	30	36	16.6831	16.9719	16.7164	16.1767	15.2654	15.8007
+	2.19281	-1.04289	AT5G63550.1;AT5G63550.2	AT5G63550.1;AT5G63550.2	2794	Color2 [DarkGray]	1	4					-1	5	5	5	11.7	11.7	11.7	59.427	0	43.554	849820	29	24	15.5814	16.0015	15.9179	15.0756	14.7448	14.5518
+	4.44075	-1.04582	AT4G14350.3;AT4G14350.4;AT4G14350.2;AT4G14350.1	AT4G14350.3;AT4G14350.4;AT4G14350.2;AT4G14350.1	1876	Color2 [DarkGray]	1	4					-1	7	7	4	25.4	25.4	15.1	63.084	0	69.875	1292000	23	27	16.7858	16.7559	16.7798	15.6631	15.8292	15.6919
+	3.32006	-1.05927	AT1G04750.1;AT2G33120.1;AT2G33120.2;AT1G04750.4;AT1G04750.3;AT1G04750.2;AT2G33120.3;AT1G04760.2;AT1G04760.1;AT2G32670.1	AT1G04750.1;AT2G33120.1;AT2G33120.2;AT1G04750.4;AT1G04750.3;AT1G04750.2	50	Color2 [DarkGray]	1	4					-1	4	4	4	26	26	26	24.765	0	116.96	2682000	15	27	17.7579	17.4875	17.4298	16.4878	16.4908	16.5188
+	4.19059	-1.06629	AT1G43800.1	AT1G43800.1	372	Color2 [DarkGray]	1	4					-1	5	5	3	17.6	17.6	14.8	44.155	0	59.567	1416900	22	26	16.9788	17.0615	17.0294	15.8824	16.0677	15.9207
+	3.28883	-1.07528	AT1G72150.1	AT1G72150.1	630	Color2 [DarkGray]	1	4					-1	6	6	6	13.8	13.8	13.8	64.046	0	59.158	1530400	33	24	17.0834	16.7707	17.0427	15.9653	15.8489	15.8567
+	3.12298	-1.08275	AT2G25430.1	AT2G25430.1	898	Color2 [DarkGray]	1	4					-1	11	11	9	23.9	23.9	22.4	72.083	0	166.62	1385900	37	31	17.2292	16.8391	17.0413	15.8985	16.0056	15.9573
+	1.43664	-1.08482	AT3G07050.1	AT3G07050.1	1244	Color2 [DarkGray]	1	4					-1	5	5	5	13.1	13.1	13.1	65.785	0	38.975	676660	31	17	15.8564	16.0522	15.5935	15.219	14.9033	14.1253
+	4.47787	-1.08836	AT4G23850.1	AT4G23850.1	1965	Color2 [DarkGray]	1	4					-1	19	19	19	35.7	35.7	35.7	74.507	0	288.86	5983700	30	77	17.8392	17.675	17.8165	16.7137	16.6693	16.6826
+	5.04782	-1.09608	AT2G47000.6;AT2G47000.5;AT2G47000.1;AT2G47000.2;AT2G47000.4;AT2G47000.7;AT2G47000.3;AT4G01830.2;AT4G01830.1;AT4G01820.1;AT4G18050.1;AT4G18050.2;AT4G01820.2;AT1G27940.2;AT1G27940.1;AT5G46540.1	AT2G47000.6;AT2G47000.5;AT2G47000.1;AT2G47000.2;AT2G47000.4;AT2G47000.7;AT2G47000.3	1137	Color2 [DarkGray]	1	4					-1	24	24	17	26.5	26.5	20.8	139.03	0	323.31	17081000	59	113	19.3426	19.3134	19.3734	18.3099	18.2393	18.192
+	2.22935	-1.09853	AT5G58710.1	AT5G58710.1	2754	Color2 [DarkGray]	1	4					-1	3	3	3	40.7	40.7	40.7	21.961	0	34.041	1198700	9	19	16.6873	16.8194	17.1305	15.9899	15.8808	15.471
+	2.90414	-1.10437	AT3G51050.1	AT3G51050.1	1598	Color2 [DarkGray]	1	4					-1	4	4	4	7.6	7.6	7.6	77.674	0	69.281	394320	29	12	15.1088	15.3767	15.3958	14.0018	14.2262	14.3402
+	1.95289	-1.10562	AT3G01800.1	AT3G01800.1	1169	Color2 [DarkGray]	1	4					-1	4	4	4	26.6	26.6	26.6	29.172	0	57.304	909270	16	22	15.9764	16.4045	16.2303	15.475	14.7326	15.0867
+	2.28185	-1.11073	AT4G11160.2;AT4G11160.1;AT4G11160.3	AT4G11160.2;AT4G11160.1;AT4G11160.3	1842	Color2 [DarkGray]	1	4					-1	3	3	3	7	7	7	80.228	0	27.447	677810	35	20	15.7632	16.4422	16.0705	15.0181	15.0292	14.8965
+	4.15273	-1.1177	AT4G30190.1;AT4G30190.2	AT4G30190.1;AT4G30190.2	2051	Color2 [DarkGray]	1	4					-1	56	56	19	53.3	53.3	22	104.4	0	323.31	84080000	50	351	21.1359	21.087	21.2989	20.0362	20.0855	20.047
+	2.19875	-1.1187	AT3G15356.1	AT3G15356.1	1353	Color2 [DarkGray]	1	4					-1	4	4	4	21.4	21.4	21.4	29.749	0	114.24	1751000	14	27	16.9815	17.4657	17.2779	16.2814	16.285	15.8026
+	3.10367	-1.13125	AT1G06530.1	AT1G06530.1	72	Color2 [DarkGray]	1	4					-1	6	6	6	25.1	25.1	25.1	36.119	0	72.801	1006000	16	20	16.9824	16.941	16.7321	15.8393	15.562	15.8604
+	2.10165	-1.14333	AT3G22950.2;AT3G22950.1	AT3G22950.2;AT3G22950.1	1443	Color2 [DarkGray]	1	4					-1	1	1	1	9.8	9.8	9.8	20.548	0	18.618	254520	10	10	14.9776	15.0044	15.0331	13.4055	14.1603	14.0192
+	1.20676	-1.14367	AT1G44910.2;AT1G44910.1	AT1G44910.2;AT1G44910.1	378	Color2 [DarkGray]	1	4					-1	12	12	12	17.3	17.3	17.3	105.64	0	137.64	931520	34	27	15.6476	16.796	15.7827	14.533	15.4173	14.845
+	3.4206	-1.14817	AT3G22260.1;AT3G22260.6;AT3G22260.5;AT3G22260.4;AT3G22260.3;AT3G22260.2	AT3G22260.1;AT3G22260.6;AT3G22260.5;AT3G22260.4;AT3G22260.3;AT3G22260.2	1434	Color2 [DarkGray]	1	4					-1	5	5	5	28.3	28.3	28.3	27.734	0	88.253	560260	12	17	15.8596	16.1581	16.0206	14.7604	14.8738	14.9597
+	2.21575	-1.17613	AT3G63080.1	AT3G63080.1	1745	Color2 [DarkGray]	1	4					-1	3	3	3	27.2	27.2	27.2	19.327	0	37.476	247580	10	9	15.1692	14.7856	15.1202	13.5319	14.1769	13.8378
+	2.81198	-1.18924	AT1G06760.1	AT1G06760.1	76	Color2 [DarkGray]	1	4					-1	3	3	2	23	23	19.3	28.946	0	53.03	1195200	11	17	17.0887	17.4186	17.3076	16.1224	16.2684	15.8563
+	2.31474	-1.19265	AT2G45960.2;AT2G45960.1;AT2G45960.3;AT1G01620.1;AT4G00430.1;AT4G00430.2;AT1G01620.2;AT4G23400.1	AT2G45960.2;AT2G45960.1;AT2G45960.3;AT1G01620.1;AT4G00430.1;AT4G00430.2	1129	Color2 [DarkGray]	1	4					-1	4	4	1	25.9	25.9	6.6	29.132	0	159.24	11225000	8	26	20.6431	20.8461	21.1322	19.4128	19.9548	19.6758
+	3.33493	-1.19719	AT1G03060.3;AT1G03060.4;AT1G03060.2;AT1G03060.1;AT4G02660.3;AT4G02660.1;AT4G02660.2	AT1G03060.3;AT1G03060.4;AT1G03060.2;AT1G03060.1	27	Color2 [DarkGray]	1	4					-1	13	13	13	6.4	6.4	6.4	397.66	0	191.71	1288600	170	37	16.1825	16.1681	16.2046	15.1585	15.0319	14.7733
+	3.99522	-1.21302	AT1G53750.1	AT1G53750.1	463	Color2 [DarkGray]	1	4					-1	18	18	18	56.3	56.3	56.3	47.803	0	248.25	10775000	28	63	19.013	18.9854	18.8199	17.6269	17.7699	17.7825
+	1.30063	-1.21468	AT4G25770.1;AT4G25770.2	AT4G25770.1;AT4G25770.2	1996	Color2 [DarkGray]	1	4					-1	5	5	5	23.9	23.9	23.9	46.762	0	44.383	333720	25	13	15.4415	15.2491	15.1323	13.2038	14.5162	14.4589
+	0.938347	-1.22181	AT5G17820.1;AT5G17820.2	AT5G17820.1;AT5G17820.2	2394	Color2 [DarkGray]	1	4					-1	4	4	4	28.1	28.1	28.1	34.098	0	99.929	837940	19	19	16.2763	16.8094	16.3919	15.9304	15.7819	14.0999
+	1.82676	-1.22201	AT2G19190.1	AT2G19190.1	823	Color2 [DarkGray]	1	4					-1	6	6	6	12.4	12.4	12.4	98.711	0	92.982	352750	39	12	15.1785	15.1337	15.2378	14.3378	14.1705	13.3756
+	1.16363	-1.2226	AT1G52540.2;AT1G52540.1;AT3G15890.1	AT1G52540.2;AT1G52540.1;AT3G15890.1	446	Color2 [DarkGray]	1	4					-1	4	4	4	21.6	21.6	21.6	39.658	0	39.84	277940	19	9	15.6482	15.6744	15.6516	14.5453	13.5303	15.2309
+	4.8523	-1.22759	AT5G03860.2;AT5G03860.1	AT5G03860.2;AT5G03860.1	2219	Color2 [DarkGray]	1	4					-1	49	49	49	82.9	82.9	82.9	63.886	0	323.31	169160000	27	421	22.0315	22.0023	22.1344	20.8819	20.8033	20.8003
+	4.47484	-1.23025	AT5G20830.3;AT5G20830.2;AT5G20830.1	AT5G20830.3;AT5G20830.2;AT5G20830.1	2432	Color2 [DarkGray]	1	4					-1	54	54	46	66.7	66.7	61.8	92.996	0	323.31	40406000	45	290	19.8867	19.9721	20.0793	18.7043	18.7722	18.7709
+	4.14946	-1.23075	AT5G43470.4;AT5G43470.3;AT5G43470.2;AT5G43470.1	AT5G43470.4;AT5G43470.3;AT5G43470.2;AT5G43470.1	2578	Color2 [DarkGray]	1	4					-1	8	8	5	14.8	14.8	9.9	104.68	0	163.89	1398100	50	32	16.5269	16.3514	16.531	15.1612	15.3051	15.2507
+	3.17892	-1.23589	AT5G07300.1;AT5G61900.3;AT5G61900.1;AT5G61910.4	AT5G07300.1	2258	Color2 [DarkGray]	1	4					-1	7	7	7	22.9	22.9	22.9	64.033	0	116.67	1077000	30	26	16.4936	16.1137	16.4737	15.1725	15.0511	15.1497
+	0.87388	-1.26377	AT5G64090.1	AT5G64090.1	2804	Color2 [DarkGray]	1	4					-1	4	4	4	21	21	21	47.725	0	65.003	553720	23	14	16.2093	15.6518	15.6632	15.128	15.3177	13.2872
+	3.9175	-1.26519	AT2G26730.1	AT2G26730.1	915	Color2 [DarkGray]	1	4					-1	6	6	6	17.5	17.5	17.5	71.751	0	220.15	2424500	35	29	17.6632	17.4552	17.6391	16.3169	16.4171	16.228
+	2.46703	-1.2669	AT5G38290.1;AT5G38290.2	AT5G38290.1;AT5G38290.2	2526	Color2 [DarkGray]	1	4					-1	2	2	2	13.8	13.8	13.8	27.259	0	15.295	336540	13	9	15.9979	16.0042	16.1678	15.1803	14.5633	14.6256
+	3.17782	-1.27558	AT5G56720.1	AT5G56720.1	2733	Color2 [DarkGray]	1	4					-1	3	2	2	15.3	11	11	40.779	0	41.323	221200	22	6	15.3332	15.1105	15.2587	13.96	13.7569	14.1587
+	2.135	-1.28577	AT1G61620.1	AT1G61620.1	520	Color2 [DarkGray]	1	4					-1	4	4	4	21.3	21.3	21.3	35.023	0	43.589	275150	18	12	15.0614	15.3163	15.1904	14.0156	14.2602	13.4349
+	4.13064	-1.29065	AT1G45000.1;AT1G45000.2	AT1G45000.1;AT1G45000.2	379	Color2 [DarkGray]	1	4					-1	21	21	1	64.4	64.4	4.3	44.755	0	323.31	16000000	23	97	20.8778	20.7944	20.642	19.4137	19.5051	19.5235
+	5.64196	-1.29142	AT2G20580.1	AT2G20580.1	847	Color2 [DarkGray]	1	4					-1	32	32	22	52.5	52.5	42	98.143	0	323.31	14039000	54	126	19.3173	19.2187	19.3039	18.002	17.9916	17.972
+	4.18836	-1.29776	AT5G57110.3;AT5G57110.2;AT5G57110.1	AT5G57110.3;AT5G57110.2;AT5G57110.1	2736	Color2 [DarkGray]	1	4					-1	11	11	11	19.4	19.4	19.4	116.17	0	266.02	4309000	45	48	18.4837	18.5084	18.4414	17.2809	17.0401	17.2192
+	1.68146	-1.30214	AT5G62350.1	AT5G62350.1	2783	Color2 [DarkGray]	1	4					-1	5	5	5	38.1	38.1	38.1	22.179	0	94.308	2413800	6	26	17.4841	18.4548	18.3078	16.9463	16.9744	16.4195
+	1.6023	-1.30272	AT2G02100.1	AT2G02100.1	750	Color2 [DarkGray]	1	4					-1	2	2	2	33.8	33.8	33.8	8.524	0	68.002	593250	3	13	15.7223	16.5122	16.8918	14.8788	15.3497	14.9896
+	3.8443	-1.31	AT3G43190.2;AT3G43190.1	AT3G43190.2;AT3G43190.1	1525	Color2 [DarkGray]	1	4					-1	34	26	26	49.1	42.7	42.7	93.002	0	323.31	10172000	46	117	18.6711	18.8623	18.9798	17.5097	17.569	17.5045
+	0.866127	-1.31411	AT4G16210.1	AT4G16210.1	1897	Color2 [DarkGray]	1	4					-1	3	3	3	22.6	22.6	22.6	28.818	0	20.654	471650	18	13	15.9073	15.9539	16.0331	15.2622	13.245	15.4449
+	3.57694	-1.31419	AT1G22530.1;AT1G22530.2	AT1G22530.1;AT1G22530.2	261	Color2 [DarkGray]	1	4					-1	18	18	18	39.4	39.4	39.4	76.007	0	323.31	5413300	45	78	18.2341	17.8621	18.0295	16.7521	16.7081	16.7229
+	5.21967	-1.3145	AT4G20260.9;AT4G20260.8;AT4G20260.7;AT4G20260.3;AT4G20260.2;AT4G20260.10;AT4G20260.1;AT4G20260.4;AT4G20260.5;AT4G20260.6	AT4G20260.9;AT4G20260.8;AT4G20260.7;AT4G20260.3;AT4G20260.2;AT4G20260.10;AT4G20260.1;AT4G20260.4;AT4G20260.5;AT4G20260.6	1926	Color2 [DarkGray]	1	4					-1	8	8	8	40.9	40.9	40.9	24.584	0	233.66	15046000	14	43	20.3445	20.2235	20.2205	18.932	18.9592	18.9538
+	1.81868	-1.32355	AT5G19450.2;AT5G19450.1	AT5G19450.2;AT5G19450.1	2411	Color2 [DarkGray]	1	4					-1	5	2	2	12.2	7.7	7.7	59.94	0	31.588	541760	25	14	15.9988	15.7875	15.8101	14.5776	13.9742	15.0739
+	3.70034	-1.33029	AT5G05780.1;AT5G05780.2	AT5G05780.1;AT5G05780.2	2247	Color2 [DarkGray]	1	4					-1	8	8	4	55.8	55.8	30.8	34.728	0	288.78	4356000	16	39	18.7793	18.6575	18.9509	17.3892	17.5752	17.4325
+	1.77864	-1.36397	AT1G65985.2;AT1G65985.1	AT1G65985.2;AT1G65985.1	568	Color2 [DarkGray]	1	4					-1	3	3	3	9.4	9.4	9.4	53.135	0	24.735	413300	21	12	16.0094	15.8198	15.8913	14.9177	13.8645	14.8464
+	3.57642	-1.37227	AT3G07020.3;AT3G07020.2;AT3G07020.1	AT3G07020.3;AT3G07020.2;AT3G07020.1	1243	Color2 [DarkGray]	1	4					-1	13	13	13	36.4	36.4	36.4	61.06	0	165.34	4234600	29	41	18.4206	18.4134	18.2437	17.1344	17.0231	16.8033
+	2.67207	-1.38183	AT3G18830.1	AT3G18830.1	1399	Color2 [DarkGray]	1	4					-1	3	3	3	8.5	8.5	8.5	58.102	0	25.354	228240	21	9	15.3137	14.9952	15.6101	13.867	14.0875	13.819
+	4.32134	-1.38335	AT1G29150.2;AT1G29150.1	AT1G29150.2;AT1G29150.1	306	Color2 [DarkGray]	1	4					-1	11	11	11	32.7	32.7	32.7	46.749	0	118.35	4430000	23	47	18.52	18.3931	18.4996	17.0676	17.2043	16.9907
+	4.40566	-1.38869	AT2G32730.1	AT2G32730.1	974	Color2 [DarkGray]	1	4					-1	12	12	7	24.1	24.1	12.2	108.98	0	212.22	5476300	38	71	17.9217	17.9886	18.1322	16.5588	16.6646	16.653
+	1.23599	-1.38932	AT5G03940.1	AT5G03940.1	2221	Color2 [DarkGray]	1	4					-1	3	3	3	13.5	13.5	13.5	61.232	0	30.111	700760	31	12	16.0662	16.1853	16.058	15.7603	14.2884	14.0927
+	0.772613	-1.39447	AT1G60200.4;AT1G60200.3;AT1G60200.2;AT1G60200.1	AT1G60200.4;AT1G60200.3;AT1G60200.2;AT1G60200.1	505	Color2 [DarkGray]	1	4					-1	3	3	3	6.4	6.4	6.4	85.987	0	49.694	606620	31	10	15.0209	16.8662	16.6337	15.9098	14.5378	13.8898
+	6.44229	-1.40929	AT1G59870.1;AT3G16340.1;AT3G16340.2;AT1G15520.2;AT3G30842.1;AT1G15520.1	AT1G59870.1	500	Color2 [DarkGray]	1	4					-1	39	39	20	28.6	28.6	16.3	165.08	0	323.31	17450000	75	200	18.4455	18.3987	18.4322	17.0073	17.0493	16.9919
+	4.62173	-1.41228	AT4G24820.2;AT4G24820.1	AT4G24820.2;AT4G24820.1	1983	Color2 [DarkGray]	1	4					-1	11	11	11	29.5	29.5	29.5	44.282	0	323.31	3861300	20	51	18.2083	18.0094	18.1507	16.7361	16.6653	16.7301
+	1.03823	-1.42066	AT1G56450.1	AT1G56450.1	490	Color2 [DarkGray]	1	4					-1	3	3	3	18.7	18.7	18.7	27.651	0	20.347	480530	12	10	15.6511	15.6931	15.8468	13.7437	15.5868	13.5985
+	3.39901	-1.45496	AT5G06530.3;AT5G06530.2;AT5G06530.1;AT5G06530.4;AT3G13220.1;AT3G52310.1	AT5G06530.3;AT5G06530.2;AT5G06530.1;AT5G06530.4	2254	Color2 [DarkGray]	1	4					-1	9	9	9	20.1	20.1	20.1	75.869	0	122.02	2224400	32	38	18.0163	17.849	17.774	16.6493	16.3068	16.3183
+	1.63943	-1.46649	AT2G20990.1;AT2G20990.3;AT2G20990.2;AT2G21010.1	AT2G20990.1;AT2G20990.3;AT2G20990.2	855	Color2 [DarkGray]	1	4					-1	9	9	9	22.4	22.4	22.4	61.743	0	159.14	1759200	34	34	18.2292	17.5757	17.064	16.5178	15.7283	16.2235
+	3.89007	-1.47646	AT3G08510.4;AT3G08510.3;AT3G08510.2;AT3G08510.1;AT3G55940.1	AT3G08510.4;AT3G08510.3;AT3G08510.2;AT3G08510.1	1258	Color2 [DarkGray]	1	4					-1	16	16	16	45.5	45.5	45.5	62.477	0	210.8	8329200	29	79	18.4985	18.4336	18.3353	16.861	17.1249	16.8522
+	3.59066	-1.48701	AT3G13230.2;AT3G13230.1	AT3G13230.2;AT3G13230.1	1323	Color2 [DarkGray]	1	4					-1	3	3	3	19.5	19.5	19.5	24.009	0	37.573	392210	11	11	15.2625	15.6348	15.2822	13.9076	13.8842	13.9268
+	4.36855	-1.50012	AT3G05530.1	AT3G05530.1	1221	Color2 [DarkGray]	1	4					-1	23	23	10	60.8	60.8	26.9	47.48	0	323.31	21128000	25	116	20.0922	20.0743	19.8605	18.5544	18.4897	18.4826
+	3.07026	-1.51067	AT5G58620.1	AT5G58620.1	2752	Color2 [DarkGray]	1	4					-1	4	3	3	11.4	8.2	8.2	66.447	0	23.176	505660	26	11	15.393	15.7046	15.5088	13.9874	14.2865	13.8005
+	4.29204	-1.51404	AT5G19990.1;AT5G19990.3;AT5G19990.2	AT5G19990.1;AT5G19990.3;AT5G19990.2	2421	Color2 [DarkGray]	1	4					-1	26	26	3	60.9	60.9	9.1	47.247	0	323.31	17033000	24	145	19.2626	19.0034	19.0793	17.5493	17.6047	17.6491
+	1.4424	-1.51799	AT2G44610.1;AT5G64990.1;AT5G10260.1;AT2G22290.1;AT4G39890.1	AT2G44610.1;AT5G64990.1;AT5G10260.1;AT2G22290.1;AT4G39890.1	1120	Color2 [DarkGray]	1	4					-1	2	2	2	14.4	14.4	14.4	23.13	0	51.934	587140	14	11	16.6131	16.0797	16.4024	14.1942	14.6026	15.7445
+	2.31957	-1.51905	AT4G04700.1	AT4G04700.1	1804	Color2 [DarkGray]	1	4					-1	8	6	6	22.9	17.9	17.9	54.898	0	93.587	595750	32	19	16.2461	15.8273	15.9796	14.025	14.7866	14.6842
+	1.41215	-1.53179	AT3G15080.1	AT3G15080.1	1348	Color2 [DarkGray]	1	4					-1	2	2	2	11.3	11.3	11.3	31.126	0	19.317	660030	13	11	16.2638	16.2495	16.3544	15.4168	15.0884	13.7671
+	2.27008	-1.53513	AT3G26560.1	AT3G26560.1	1486	Color2 [DarkGray]	1	4					-1	3	3	3	3.3	3.3	3.3	134.16	0	27.448	377530	65	8	15.7167	16.0482	15.91	14.5851	13.8326	14.6518
+	4.54822	-1.53589	AT2G26300.2;AT2G26300.1	AT2G26300.2;AT2G26300.1	911	Color2 [DarkGray]	1	4					-1	7	7	7	28.5	28.5	28.5	44.545	0	91.089	1849800	27	28	17.6561	17.4986	17.628	16.1342	15.9563	16.0844
+	2.29978	-1.54031	AT4G04340.3;AT4G04340.2;AT4G04340.1	AT4G04340.3;AT4G04340.2;AT4G04340.1	1799	Color2 [DarkGray]	1	4					-1	3	3	3	4.9	4.9	4.9	87.606	0	26.736	237010	40	7	15.7258	15.3472	15.622	13.6716	14.5107	13.8918
+	3.29012	-1.54739	AT1G75990.1	AT1G75990.1	671	Color2 [DarkGray]	1	4					-1	13	5	5	29.2	13.6	13.6	55.591	0	51.081	1553100	32	21	17.3245	17.3918	17.5053	15.9438	16.0521	15.5836
+	4.18398	-1.55218	AT5G58290.1	AT5G58290.1	2748	Color2 [DarkGray]	1	4					-1	16	16	16	49.3	49.3	49.3	45.751	0	323.31	8479600	23	92	18.8461	18.6374	18.727	17.2338	17.2667	17.0535
+	4.16296	-1.55647	AT1G27190.1;AT1G69990.1	AT1G27190.1	294	Color2 [DarkGray]	1	4					-1	10	10	10	27.1	27.1	27.1	65.423	0	220.67	2373900	27	38	18.0871	18.0294	18.0308	16.3167	16.6048	16.5565
+	2.71271	-1.55842	AT5G66200.1	AT5G66200.1	2835	Color2 [DarkGray]	1	4					-1	8	8	8	23	23	23	70.812	0	81.632	802250	39	27	16.0238	15.5561	15.3168	14.0961	14.1605	13.9648
+	1.78701	-1.56309	AT1G52320.4;AT1G52320.3;AT1G52320.1;AT1G52320.5;AT1G52320.2	AT1G52320.4;AT1G52320.3;AT1G52320.1;AT1G52320.5;AT1G52320.2	443	Color2 [DarkGray]	1	4					-1	5	5	5	16.1	16.1	16.1	54.951	0	51.468	445950	29	14	15.9876	16.0037	16.0692	14.3563	15.1798	13.8351
+	3.21908	-1.57409	AT2G34660.3;AT2G34660.2;AT2G34660.1	AT2G34660.3;AT2G34660.2;AT2G34660.1	996	Color2 [DarkGray]	1	4					-1	5	5	4	7.3	7.3	6.2	149.01	0	40.06	519390	62	14	15.8435	15.5511	15.7663	14.3436	14.2056	13.8895
+	1.23479	-1.60898	AT2G24440.1	AT2G24440.1	886	Color2 [DarkGray]	1	4					-1	3	3	3	25.1	25.1	25.1	20.712	0	31.913	313940	6	10	15.5454	16.1373	15.7029	14.3723	15.095	13.0914
+	3.77159	-1.60939	AT3G61820.1	AT3G61820.1	1734	Color2 [DarkGray]	1	4					-1	2	2	2	7.7	7.7	7.7	51.461	0	23.697	395990	21	10	15.3888	15.5181	15.6469	14.084	13.8685	13.7732
+	4.48099	-1.61061	AT1G20200.1	AT1G20200.1	232	Color2 [DarkGray]	1	4					-1	13	13	5	28.7	28.7	13.1	55.582	0	222.43	4906500	33	47	18.512	18.3874	18.606	16.9355	16.9392	16.7989
+	3.17366	-1.61302	AT4G04695.1	AT4G04695.1	1803	Color2 [DarkGray]	1	4					-1	9	9	8	28.1	28.1	28.1	54.696	0	141.49	2242000	30	32	17.2728	16.8215	17.1334	15.5853	15.5462	15.2571
+	5.34407	-1.64357	AT4G29040.1;AT2G20140.1	AT4G29040.1;AT2G20140.1	2040	Color2 [DarkGray]	1	4					-1	18	18	18	44.9	44.9	44.9	49.369	0	323.31	12592000	25	102	19.2846	19.2849	19.2116	17.6974	17.5564	17.5965
+	0.684567	-1.67203	ATCG00270.1	ATCG00270.1	2859	Color2 [DarkGray]	1	4					-1	1	1	1	6.2	6.2	6.2	39.547	0.0004207	9.049	771420	10	11	17.3317	16.9475	17.3586	13.3347	16.6484	16.6386
+	1.24293	-1.68259	AT1G73030.1;AT1G17730.1	AT1G73030.1;AT1G17730.1	639	Color2 [DarkGray]	1	4					-1	2	2	2	11.8	11.8	11.8	22.691	0	41.851	513760	9	11	16.1383	16.458	16.4559	15.9011	13.8565	14.2468
+	0.676652	-1.68796	AT1G18070.1;AT1G18070.2;AT1G18070.3	AT1G18070.1;AT1G18070.2;AT1G18070.3	212	Color2 [DarkGray]	1	4					-1	4	4	4	10.9	10.9	10.9	59.242	0	31.961	658630	28	12	16.4949	16.7673	16.6011	17.1269	14.3091	13.3635
+	1.15907	-1.70771	AT3G28460.3;AT3G28460.1;AT3G28460.2	AT3G28460.3;AT3G28460.1;AT3G28460.2	1509	Color2 [DarkGray]	1	4					-1	4	4	4	23.4	23.4	23.4	29.801	0	27.003	869040	12	14	16.3319	16.599	16.7375	13.9143	16.1775	14.4535
+	0.938356	-1.71775	AT1G15270.1	AT1G15270.1	183	Color2 [DarkGray]	1	4					-1	1	1	1	25	25	25	6.978	0	18.574	1413400	2	11	17.4952	17.9597	18.1057	17.0364	16.9056	14.4654
+	3.93424	-1.72739	AT3G46530.1;AT3G46710.1	AT3G46530.1	1551	Color2 [DarkGray]	1	4					-1	19	19	19	34.3	34.3	34.3	97.266	0	271.94	8442700	44	84	18.6938	18.6766	18.8115	16.9833	17.1937	16.8228
+	5.33842	-1.73112	AT1G64520.1;AT5G42040.1	AT1G64520.1	552	Color2 [DarkGray]	1	4					-1	15	15	15	71.5	71.5	71.5	30.706	0	287.77	11000000	15	68	19.7143	19.5496	19.651	17.8745	17.9101	17.9369
+	3.82577	-1.75349	AT2G31570.1	AT2G31570.1	957	Color2 [DarkGray]	1	4					-1	4	4	4	30.8	30.8	30.8	18.944	0	135.89	4577400	12	23	19.3718	19.0413	19.1049	17.3152	17.5603	17.382
+	3.29421	-1.76162	AT3G57990.1	AT3G57990.1	1689	Color2 [DarkGray]	1	4					-1	9	9	9	41.1	41.1	41.1	39.891	0	93.741	1117400	17	26	16.3284	16.3272	15.9914	14.2884	14.7102	14.3635
+	2.65687	-1.77071	AT5G19520.2;AT5G19520.1	AT5G19520.2;AT5G19520.1	2414	Color2 [DarkGray]	1	4					-1	2	2	2	5.4	5.4	5.4	84.248	0	22.511	203450	36	10	15.6499	15.521	15.4573	13.9019	13.2945	14.1196
+	4.04439	-1.77274	AT1G72160.1	AT1G72160.1	631	Color2 [DarkGray]	1	4					-1	13	13	12	32.9	32.9	30.8	56.104	0	323.31	5400900	27	51	18.7293	18.4922	18.4772	16.6731	16.7749	16.9324
+	0.973612	-1.78429	AT5G45750.1;AT4G18800.1;AT5G60860.1	AT5G45750.1	2594	Color2 [DarkGray]	1	4					-1	7	7	6	39.8	39.8	32.9	23.87	0	208.65	3090300	12	26	18.1191	18.2932	18.176	17.2521	17.2857	14.6977
+	3.02283	-1.81335	AT4G13010.1	AT4G13010.1	1860	Color2 [DarkGray]	1	4					-1	6	6	6	38.3	38.3	38.3	34.436	0	46.663	661910	16	15	16.3163	16.2605	16.2753	14.8812	14.313	14.2179
+	0.770239	-1.82909	AT3G06610.1	AT3G06610.1	1233	Color2 [DarkGray]	1	4					-1	4	4	4	49.6	49.6	49.6	12.795	0	65.135	772590	6	12	17.2427	14.5955	16.1303	12.7497	15.4389	14.2926
+	5.98743	-1.86665	AT3G07160.1;AT3G07160.3;AT3G07160.2;AT4G04970.1;AT4G03550.1	AT3G07160.1;AT3G07160.3;AT3G07160.2	1247	Color2 [DarkGray]	1	4					-1	20	20	16	16.1	16.1	13.2	217.08	0	227.73	3442400	94	67	17.3957	17.2657	17.3186	15.455	15.4561	15.469
+	2.36008	-1.88608	AT5G23540.1;AT5G23540.2	AT5G23540.1;AT5G23540.2	2461	Color2 [DarkGray]	1	4					-1	8	8	8	54.5	54.5	54.5	34.353	0	96.138	1818100	13	30	17.458	16.9065	16.7792	15.2345	15.552	14.699
+	1.69588	-1.92156	AT5G58670.1	AT5G58670.1	2753	Color2 [DarkGray]	1	4					-1	8	8	8	24.2	24.2	24.2	64.313	0	103.3	927080	29	17	16.1328	15.9762	16.1065	14.8048	14.5043	13.1417
+	1.77331	-1.92246	AT5G37710.1;AT5G37710.2	AT5G37710.1;AT5G37710.2	2523	Color2 [DarkGray]	1	4					-1	8	8	8	25.5	25.5	25.5	49.736	0	121.52	877390	22	22	16.5826	16.5282	16.6904	15.2854	15.0284	13.72
+	1.81635	-1.9227	AT5G23670.2;AT5G23670.1	AT5G23670.2;AT5G23670.1	2465	Color2 [DarkGray]	1	4					-1	5	5	4	18	18	13.3	54.289	0	31.938	554300	26	15	16.2484	16.0714	16.2635	15.0419	14.3496	13.4237
+	2.42015	-1.93777	AT5G03530.2;AT5G03530.1;AT3G09910.5;AT3G09910.4;AT3G09910.3;AT3G09910.2;AT3G09910.1	AT5G03530.2;AT5G03530.1	2212	Color2 [DarkGray]	1	4					-1	7	7	7	37.1	37.1	37.1	23.305	0	64.171	647520	14	14	16.3623	16.1139	16.2451	13.7013	14.453	14.7537
+	1.05996	-1.96716	AT2G04350.2;AT2G04350.1	AT2G04350.2;AT2G04350.1	761	Color2 [DarkGray]	1	4					-1	9	9	9	16.5	16.5	16.5	78.342	0	99.088	1481200	32	21	17.3207	17.9787	18.0268	16.8793	16.3978	14.1476
+	4.2343	-1.97085	AT5G35590.1	AT5G35590.1	2512	Color2 [DarkGray]	1	4					-1	4	4	4	21.1	21.1	21.1	27.294	0	28.011	466940	19	13	16.0855	16.0618	16.1239	13.9069	14.2682	14.1837
+	5.73893	-1.97237	AT1G30690.2;AT1G30690.1	AT1G30690.2;AT1G30690.1	327	Color2 [DarkGray]	1	4					-1	7	7	7	18.5	18.5	18.5	61.189	0	145.81	8492500	28	35	19.2792	19.2174	19.2273	17.219	17.2349	17.3529
+	2.89195	-1.98365	AT5G48000.7;AT5G48000.6;AT5G48000.5;AT5G48000.4;AT5G48000.3;AT5G48000.2;AT5G48000.1	AT5G48000.7;AT5G48000.6;AT5G48000.5;AT5G48000.4;AT5G48000.3;AT5G48000.2;AT5G48000.1	2625	Color2 [DarkGray]	1	4					-1	2	2	2	6.3	6.3	6.3	54.091	0	35.083	320390	24	8	15.8169	16.0063	16.1264	13.8137	14.4546	13.7303
+	1.90371	-2.01297	AT2G40890.1	AT2G40890.1	1070	Color2 [DarkGray]	1	4					-1	5	5	5	13.6	13.6	13.6	57.926	0	36.644	734010	27	12	16.4036	16.53	16.4151	13.6093	14.4839	15.2166
+	1.60503	-2.02664	AT3G44750.2;AT3G44750.1	AT3G44750.2;AT3G44750.1	1534	Color2 [DarkGray]	1	4					-1	2	2	2	9.1	9.1	9.1	25.985	0	41.572	846460	12	11	16.4198	17.5679	15.9978	14.765	15.1459	13.9946
+	1.00903	-2.03066	AT4G11850.1;AT4G11840.2;AT4G11840.1;AT4G11830.4;AT4G11830.3;AT4G11830.1;AT4G11830.2	AT4G11850.1	1850	Color2 [DarkGray]	1	4					-1	6	6	6	11.5	11.5	11.5	95.587	0	122.67	745750	43	16	16.5495	16.7341	16.6919	14.2496	16.4165	13.2174
+	4.74282	-2.08699	AT5G65700.2;AT5G65700.1	AT5G65700.2;AT5G65700.1	2825	Color2 [DarkGray]	1	4					-1	10	10	6	17.4	17.4	10.1	109.2	0	178.33	3764300	48	39	18.3488	18.1514	18.327	16.2213	16.274	16.071
+	2.87075	-2.12587	AT2G19970.1	AT2G19970.1	835	Color2 [DarkGray]	1	4					-1	2	2	2	14.1	14.1	14.1	19.953	0	27.915	582840	9	13	16.3681	16.7616	16.5756	14.2134	14.1889	14.9254
+	3.13394	-2.15555	AT1G15210.1;AT2G29940.1	AT1G15210.1	182	Color2 [DarkGray]	1	4					-1	30	11	11	25.9	12.1	12.1	162.57	0	135.89	1313400	71	28	16.2646	16.2708	16.2438	14.0392	13.7408	14.5326
+	2.95528	-2.18689	AT3G51670.1	AT3G51670.1	1606	Color2 [DarkGray]	1	4					-1	3	3	3	13.2	13.2	13.2	46.51	0	75.158	328570	19	9	16.0453	15.6876	15.6164	13.4866	13.2737	14.0284
+	3.16149	-2.23123	AT1G09100.1	AT1G09100.1	109	Color2 [DarkGray]	1	4					-1	16	3	3	47.8	11.3	11.3	47.037	0	83.675	468710	25	9	16.4711	16.3074	16.335	14.2972	13.6874	14.4352
+	0.908233	-2.23478	AT2G22660.2;AT2G22660.3;AT2G22660.1	AT2G22660.2;AT2G22660.3;AT2G22660.1	870	Color2 [DarkGray]	1	4					-1	7	7	7	14.2	14.2	14.2	89.486	0	84.339	1637300	49	20	18.178	18.0351	18.251	13.6342	17.2248	16.9008
+	3.59445	-2.27581	AT1G53210.1	AT1G53210.1	452	Color2 [DarkGray]	1	4					-1	5	5	5	12.8	12.8	12.8	63.416	0	73.152	552920	18	15	16.3213	16.2183	16.0148	14.1589	13.6045	13.9635
+	4.33568	-2.29099	AT5G09900.1;AT5G09900.2;AT5G09900.3;AT5G64760.3;AT5G64760.2;AT5G64760.1	AT5G09900.1;AT5G09900.2;AT5G09900.3	2284	Color2 [DarkGray]	1	4					-1	14	14	14	46.4	46.4	46.4	50.837	0	323.31	2336400	26	36	18.0577	18.1939	18.413	15.8933	15.8447	16.0537
+	4.9821	-2.31265	AT2G18730.1	AT2G18730.1	818	Color2 [DarkGray]	1	4					-1	4	4	4	14.8	14.8	14.8	53.88	0	26.405	521300	24	9	17.0604	16.8317	17.008	14.5592	14.6904	14.7127
+	3.72834	-2.31653	AT3G63260.1;AT3G63260.2	AT3G63260.1;AT3G63260.2	1748	Color2 [DarkGray]	1	4					-1	9	9	9	34.3	34.3	34.3	42.582	0	163.51	3528800	23	34	18.7295	18.4813	18.1635	16.2489	16.0385	16.1373
+	1.53618	-2.32574	AT2G45820.1	AT2G45820.1	1128	Color2 [DarkGray]	1	4					-1	7	7	7	41.1	41.1	41.1	20.968	0	65.78	1276000	12	20	17.7016	17.6071	17.3033	15.7629	13.8443	16.0276
+	3.87255	-2.32802	AT1G15690.1;AT1G15690.2	AT1G15690.1	187	Color2 [DarkGray]	1	4					-1	6	6	6	12.3	12.3	12.3	80.819	0	67.951	2673100	27	30	17.9068	17.9908	17.4745	15.4809	15.4203	15.4868
+	2.62682	-2.35785	AT4G33110.2;AT4G33110.1	AT4G33110.2;AT4G33110.1	2095	Color2 [DarkGray]	1	4					-1	2	2	2	9.3	9.3	9.3	41.228	0	19.485	445280	16	8	16.6471	16.4417	16.7241	14.1339	13.7341	14.8714
+	1.49175	-2.36916	AT4G29160.3;AT4G29160.1	AT4G29160.3;AT4G29160.1	2043	Color2 [DarkGray]	1	4					-1	3	3	2	20.1	20.1	10	24.333	0	40.073	511700	11	11	16.3231	16.6127	16.4082	12.867	15.391	13.9785
+	1.55206	-2.36943	AT1G51805.1;AT1G51805.2	AT1G51805.1;AT1G51805.2	434	Color2 [DarkGray]	1	4					-1	13	11	10	26.5	21.5	20	98.075	0	154.83	2138900	44	36	18.2605	17.2301	16.4684	15.4176	15.4311	14.0021
+	3.43518	-2.39072	AT1G51850.2;AT1G51850.1;AT2G04300.1;AT2G04300.2;AT3G21340.1	AT1G51850.2;AT1G51850.1	438	Color2 [DarkGray]	1	4					-1	20	20	17	34.6	34.6	28.4	98.329	0	319.1	6743100	41	74	18.9425	18.434	18.6121	16.166	16.5756	16.0748
+	2.94812	-2.45872	AT4G24190.2;AT4G24190.1	AT4G24190.2;AT4G24190.1	1968	Color2 [DarkGray]	1	4					-1	3	3	3	4.6	4.6	4.6	94.148	0	23.701	616050	42	9	16.5355	16.8456	16.793	14.0302	13.9466	14.8211
+	2.60903	-2.48851	AT1G06190.2;AT1G06190.4;AT1G06190.3;AT1G06190.1;AT1G06190.5	AT1G06190.2;AT1G06190.4;AT1G06190.3;AT1G06190.1;AT1G06190.5	67	Color2 [DarkGray]	1	4					-1	3	3	3	12.3	12.3	12.3	32.596	0	21.364	488380	15	9	16.7505	16.4294	16.2272	14.2598	14.3654	13.3164
+	3.11798	-2.53113	AT2G32920.1	AT2G32920.1	977	Color2 [DarkGray]	1	4					-1	2	2	2	4.5	4.5	4.5	47.754	0	45.965	598920	18	9	16.6607	16.9584	16.9627	13.9156	14.2783	14.7945
+	3.79627	-2.54547	AT3G21600.1;AT3G21600.2;AT3G21600.3	AT3G21600.1;AT3G21600.2;AT3G21600.3	1428	Color2 [DarkGray]	1	4					-1	4	4	3	23.3	23.3	16.6	40.454	0	43.279	391960	24	11	16.7036	16.6327	16.5288	14.0022	13.8128	14.4137
+	3.56822	-2.56456	AT1G32050.1	AT1G32050.1	339	Color2 [DarkGray]	1	4					-1	3	3	3	19.7	19.7	19.7	30.06	0	69.458	491150	9	9	16.7146	16.5154	16.3583	14.2704	13.9954	13.6289
+	2.17853	-2.59869	AT3G61050.2;AT3G61050.1;AT3G61030.1;AT3G60950.1	AT3G61050.2;AT3G61050.1	1720	Color2 [DarkGray]	1	4					-1	7	7	7	23.5	23.5	23.5	55.094	0	81.319	1882200	25	25	17.856	17.5613	17.7465	15.6296	14.1332	15.605
+	1.86476	-2.62974	AT5G57350.4;AT5G57350.2;AT5G57350.1;AT5G57350.3;AT3G42640.1;AT3G60330.4;AT3G60330.3;AT3G60330.2;AT3G60330.1;AT4G11730.1	AT5G57350.4;AT5G57350.2;AT5G57350.1;AT5G57350.3	2739	Color2 [DarkGray]	1	4					-1	29	10	10	34.1	15.7	15.7	104.45	0	88.735	1404600	49	23	16.9164	16.8927	16.8932	15.5183	13.7313	13.5635
+	5.2981	-2.66862	AT1G19110.1	AT1G19110.1	221	Color2 [DarkGray]	1	4					-1	20	20	20	37	37	37	83.017	0	323.31	26774000	33	103	20.6029	20.4344	20.5758	17.8647	17.9782	17.7644
+	2.73779	-2.67595	AT1G68370.1	AT1G68370.1	591	Color2 [DarkGray]	1	4					-1	8	8	8	33.2	33.2	33.2	45.483	0	88.455	840030	26	19	16.5213	16.399	16.5147	14.3279	13.9712	13.1081
+	1.07812	-2.73454	AT5G22320.2;AT5G22320.1	AT5G22320.2;AT5G22320.1	2445	Color2 [DarkGray]	1	4					-1	7	7	7	21.6	21.6	21.6	48.863	0	76.507	2504700	26	18	18.5061	18.6633	18.8054	14.7846	18.3014	14.6852
+	0.916889	-2.73926	AT1G07320.4;AT1G07320.3;AT1G07320.2;AT1G07320.1	AT1G07320.4;AT1G07320.3;AT1G07320.2;AT1G07320.1	84	Color2 [DarkGray]	1	4					-1	5	5	5	31.3	31.3	31.3	30.142	0	54.993	2407300	14	15	17.9036	18.1941	18.0881	18.1075	13.9715	13.889
+	4.77542	-2.76929	AT3G11270.1;AT3G11270.2	AT3G11270.1;AT3G11270.2	1291	Color2 [DarkGray]	1	4					-1	6	2	2	39	14.2	14.2	35.085	0	84.097	668140	16	11	16.6691	16.5826	16.7594	13.8676	13.7445	14.0911
+	4.31907	-2.82748	AT3G58760.6;AT3G58760.4;AT3G58760.2;AT3G58760.1;AT3G58760.5;AT3G58760.3	AT3G58760.6;AT3G58760.4;AT3G58760.2;AT3G58760.1;AT3G58760.5;AT3G58760.3	1699	Color2 [DarkGray]	1	4					-1	4	4	4	21.4	21.4	21.4	41.388	0	38.965	490660	23	11	16.4871	16.6477	16.3895	13.8045	13.8186	13.4188
+	2.98171	-2.82841	AT4G29900.2;AT4G29900.1	AT4G29900.2;AT4G29900.1	2049	Color2 [DarkGray]	1	4					-1	14	14	14	27	27	27	116.86	0	270.14	3736300	46	56	17.9252	17.8512	18.0881	15.4024	15.4974	14.4794
+	2.31599	-2.94923	AT3G51880.4;AT3G51880.5;AT3G51880.3;AT3G51880.1;AT3G51880.2	AT3G51880.4;AT3G51880.5;AT3G51880.3;AT3G51880.1;AT3G51880.2	1611	Color2 [DarkGray]	1	4					-1	2	2	2	16.1	16.1	16.1	18.319	0	89.763	729940	6	8	17.3274	17.6288	16.2144	14.2979	13.5277	14.4972
+	1.57525	-3.00513	AT3G52920.2;AT3G52920.1	AT3G52920.2;AT3G52920.1	1625	Color2 [DarkGray]	1	4					-1	6	6	3	41.8	41.8	20.3	20.667	0	80.166	1533400	8	17	17.5679	17.4992	18.0749	13.5326	14.2157	16.3784
+	2.58631	-3.02582	AT5G19290.1	AT5G19290.1	2407	Color2 [DarkGray]	1	4					-1	3	3	3	13	13	13	36.662	0	39.936	956350	14	12	17.147	17.0176	17.2541	13.3605	14.9071	14.0737
+	5.24494	-3.06086	AT4G28520.1;AT4G28520.3;AT4G28520.2;AT4G28520.4;AT4G28520.5	AT4G28520.1;AT4G28520.3;AT4G28520.2;AT4G28520.4;AT4G28520.5	2036	Color2 [DarkGray]	1	4					-1	9	9	9	32.3	32.3	32.3	58.235	0	115.03	988180	27	18	17.1354	17.041	17.0324	13.8318	14.0707	14.1238
+	1.23968	-3.07383	AT2G37170.1	AT2G37170.1	1021	Color2 [DarkGray]	1	4					-1	2	1	1	16.8	4.6	4.6	30.453	0	15.546	1693700	7	11	18.0199	18.6207	18.6035	13.9673	17.6199	14.4353
+	2.74018	-3.11914	AT1G52760.1	AT1G52760.1	449	Color2 [DarkGray]	1	4					-1	7	7	7	33.4	33.4	33.4	36.975	0	65.107	796400	11	13	16.7358	16.8253	16.9142	14.3955	12.9431	13.7792
+	3.34826	-3.16316	AT2G41560.1;AT2G41560.4;AT2G41560.3;AT2G41560.2;AT3G57330.2	AT2G41560.1;AT2G41560.4;AT2G41560.3;AT2G41560.2	1076	Color2 [DarkGray]	1	4					-1	5	5	4	5.7	5.7	4.7	112.75	0	43.917	847940	43	11	17.0797	16.9523	16.9754	13.5558	14.4309	13.5313
+	3.03798	-3.1679	AT4G35000.1	AT4G35000.1	2119	Color2 [DarkGray]	1	4					-1	5	5	5	33.1	33.1	33.1	31.571	0	64.395	948150	18	14	17.3852	16.9391	17.3264	13.6321	13.8114	14.7034
+	1.9643	-3.16882	AT3G22640.1	AT3G22640.1	1439	Color2 [DarkGray]	1	4					-1	5	5	5	20.8	20.8	20.8	55.062	0	169.4	1748600	25	17	17.6949	17.8632	17.8799	15.8822	13.4505	14.5989
+	3.65578	-3.20639	AT5G50700.1;AT5G50600.1	AT5G50700.1;AT5G50600.1	2655	Color2 [DarkGray]	1	4					-1	8	8	8	39.3	39.3	39.3	39.086	0	213.54	1649200	21	24	17.3974	17.3443	17.5299	13.8753	14.6953	14.0819
+	3.41282	-3.20846	AT2G17440.1	AT2G17440.1	806	Color2 [DarkGray]	1	4					-1	10	10	10	35.2	35.2	35.2	58.742	0	94.2	1968100	28	28	17.5345	17.5419	17.6916	14.5116	13.8318	14.7992
+	1.08418	-3.28634	ATCG00280.1	ATCG00280.1	2860	Color2 [DarkGray]	1	4					-1	4	4	4	11.2	11.2	11.2	51.867	0	75.163	3918300	14	13	19.2629	19.4378	19.0802	14.7942	18.8035	14.3241
[truncated: 24 more rows]

## Sheet: Combined ID
Proteins in PafA-CC1 exclusive or with significant enrichment were combined
[truncated: 321 more rows]
