# Supplementary material for: Pupylation-based proximity labelling reveals regulatory factors in cellulose biosynthesis in Arabidopsis
Source: Research Square preprint supplement (doi:10.21203/rs.3.rs-3849556/v1), 2024-09-30
Supplement: Supplementary file 4 [file e27bee18d73d4a89aa067f89.xlsx]

## Sheet: mock and ind LFQ (biotin elu)
Log2 transformed LFQ of proteins detected in samples from biotin or mock treatment, proteins were eluted by biotin.
biotin_mock_rep1	biotin_mock_rep2	biotin_mock_rep3	biotin_ind_rep1	biotin_ind_rep2	biotin_ind_rep3	C: Only identified by site	C: Reverse	C: Potential contaminant	C: Taxonomy IDs	N: Peptides	N: Razor + unique peptides	N: Unique peptides	N: Sequence coverage [%]	N: Unique + razor sequence coverage [%]	N: Unique sequence coverage [%]	N: Mol. weight [kDa]	N: Q-value	N: Score	N: Intensity	N: iBAQ peptides	N: MS/MS count	T: Protein IDs	T: Majority protein IDs	T: id
19.6732	20.2351	19.9168	19.6052	19.5965	19.9741				-1	7	7	7	5.3	5.3	5.3	263.76	0	63.35	10173000	104	20	AT1G02080.2;AT1G02080.3;AT1G02080.1	AT1G02080.2;AT1G02080.3;AT1G02080.1	2
23.4133	NaN	23.1862	23.2673	23.6443	23.3366				-1	7	7	4	19.6	19.6	14	24.606	0	61.473	98897000	6	31	AT1G02780.1	AT1G02780.1	4
25.6031	25.0263	25.3772	25.2366	25.726	25.5475				-1	38	38	38	58.3	58.3	58.3	80.45	0	323.31	1213500000	39	234	AT1G03090.2;AT1G03090.1	AT1G03090.2;AT1G03090.1	5
NaN	NaN	21.7181	21.7568	21.7034	21.6529				-1	4	4	4	7.4	7.4	7.4	88.837	0	42.165	22393000	20	14	AT1G03530.1	AT1G03530.1	6
22.1202	22.138	22.3166	21.8664	22.3647	22.3596				-1	4	4	4	39.7	39.7	39.7	17.058	0	37.469	41683000	7	21	AT1G04270.2;AT5G09510.1;AT1G04270.1;AT5G09510.2;AT5G43640.1	AT1G04270.2;AT5G09510.1;AT1G04270.1	8
24.2603	24.1004	24.098	23.7511	23.9256	24.0976				-1	14	14	4	35.1	35.1	14.2	49.537	0	260.71	298910000	21	84	AT4G14960.2;AT1G50010.1;AT1G04820.1;AT4G14960.1;AT1G64740.1	AT4G14960.2;AT1G50010.1;AT1G04820.1;AT4G14960.1	12
NaN	25.4975	24.7447	24.8174	24.9467	24.829				-1	6	6	6	41.7	41.7	41.7	11.409	0	71.461	228620000	6	37	AT5G59970.2;AT5G59970.1;AT5G59690.1;AT3G53730.1;AT3G46320.1;AT3G45930.1;AT2G28740.1;AT1G07820.2;AT1G07820.1;AT1G07660.1;AT1G07660.2	AT5G59970.2;AT5G59970.1;AT5G59690.1;AT3G53730.1;AT3G46320.1;AT3G45930.1;AT2G28740.1;AT1G07820.2;AT1G07820.1;AT1G07660.1;AT1G07660.2	20
19.9373	NaN	19.6399	19.8091	NaN	19.9211				-1	5	5	5	15.8	15.8	15.8	57.405	0	43.643	9700700	21	16	AT1G07705.1;AT1G07705.2	AT1G07705.1;AT1G07705.2	21
21.8941	21.983	21.8748	21.9392	22.6877	22.0357				-1	4	4	4	31.1	31.1	31.1	14.544	0	36.77	34758000	7	14	AT5G02570.1;AT2G37470.1;AT5G22880.1;AT3G46030.1;AT1G07790.1;AT5G59910.1;AT3G45980.1;AT2G28720.1;AT3G09480.1;AT3G53650.1	AT5G02570.1;AT2G37470.1;AT5G22880.1;AT3G46030.1;AT1G07790.1;AT5G59910.1;AT3G45980.1;AT2G28720.1;AT3G09480.1;AT3G53650.1	22
21.6077	NaN	21.602	21.3201	22.1652	21.6559				-1	7	7	7	36	36	36	27.561	0	48.057	26761000	14	18	AT1G07890.8;AT1G07890.7;AT1G07890.5;AT1G07890.4;AT1G07890.3;AT1G07890.2;AT1G07890.1;AT1G07890.6	AT1G07890.8;AT1G07890.7;AT1G07890.5;AT1G07890.4;AT1G07890.3;AT1G07890.2;AT1G07890.1;AT1G07890.6	23
26.6585	26.0968	26.26	26.4018	26.3056	26.2521				-1	18	18	18	37.6	37.6	37.6	49.502	0	263.3	1615600000	25	136	AT5G60390.3;AT5G60390.2;AT5G60390.1;AT1G07940.4;AT1G07940.3;AT1G07940.2;AT1G07940.1;AT1G07930.1;AT1G07920.1;AT1G07930.2	AT5G60390.3;AT5G60390.2;AT5G60390.1;AT1G07940.4;AT1G07940.3;AT1G07940.2;AT1G07940.1;AT1G07930.1;AT1G07920.1;AT1G07930.2	24
21.2733	21.3163	21.1411	21.0006	21.1122	21.2844				-1	6	6	6	20.3	20.3	20.3	36.307	0	48.868	22398000	19	20	AT1G09130.1;AT1G09130.2;AT1G09130.3	AT1G09130.1;AT1G09130.2;AT1G09130.3	26
21.8665	21.7254	21.4901	21.0783	21.5822	21.3082				-1	9	6	6	29	16.7	16.7	46.66	0	42.458	25700000	17	19	AT1G09640.1;AT1G09640.2	AT1G09640.1;AT1G09640.2	29
19.7614	NaN	NaN	19.3516	19.7039	19.416				-1	7	7	5	19.9	19.9	16.3	64.584	0	44.562	8409500	27	17	AT1G12270.1	AT1G12270.1	39
20.6191	20.7805	20.8139	20.464	20.5357	20.3871				-1	12	12	12	24.8	24.8	24.8	59.324	0	77.018	18574000	37	26	AT1G13020.1;AT3G26400.1	AT1G13020.1	42
22.6485	22.0574	22.7363	22.4871	22.1607	22.1739				-1	29	3	3	71.3	10.9	10.9	36.913	0	33.008	44060000	21	13	AT1G13440.1;AT1G13440.2	AT1G13440.1;AT1G13440.2	44
21.868	22.2349	22.2466	22.3892	21.9851	22.1791				-1	10	10	10	32.7	32.7	32.7	46.803	0	133.94	66687000	20	47	AT1G13730.2;AT1G13730.1	AT1G13730.2;AT1G13730.1	45
21.8355	21.9227	21.8667	22.0362	21.8866	21.8582				-1	16	16	16	31.6	31.6	31.6	87.593	0	144.98	67386000	34	57	AT1G14650.3;AT1G14650.2;AT1G14650.1;AT1G14640.2;AT1G14640.1	AT1G14650.3;AT1G14650.2;AT1G14650.1	48
20.7584	20.1509	20.506	20.5841	20.4762	20.5666				-1	10	10	10	32.8	32.8	32.8	40.745	0	81.545	27561000	16	33	AT1G14810.1;AT1G14810.2	AT1G14810.1;AT1G14810.2	49
24.0833	24.0352	24.2251	23.8554	23.9073	23.8169				-1	8	8	8	77.6	77.6	77.6	10.812	0	87.648	194860000	7	44	AT1G14980.1;AT1G14980.2	AT1G14980.1;AT1G14980.2	50
20.0925	20.5147	20.789	20.4532	NaN	20.1287				-1	4	4	4	8.9	8.9	8.9	95.208	0	43.438	9413600	45	13	AT1G15130.1	AT1G15130.1	51
NaN	NaN	20.0079	19.9659	19.8788	19.8776				-1	6	6	6	24.7	24.7	24.7	42.357	0	37.736	7382800	21	14	AT1G15340.1;AT1G15340.2	AT1G15340.1;AT1G15340.2	54
25.1202	25.1572	25.0802	24.9619	24.9645	24.7872				-1	39	26	26	37.6	30.9	30.9	126.78	0	323.31	744970000	46	151	AT1G16270.3;AT1G16270.2;AT1G16270.1;AT3G24715.3;AT3G24715.2;AT3G24715.1;AT1G04700.2;AT1G04700.1;AT1G14000.1;AT4G23050.1;AT4G23050.2	AT1G16270.3;AT1G16270.2;AT1G16270.1	57
22.4813	22.3461	22.6876	22.5389	22.2857	22.3918				-1	15	15	15	34.7	34.7	34.7	74.805	0	130.18	104090000	17	63	AT1G17440.2;AT1G17440.1	AT1G17440.2;AT1G17440.1	60
NaN	20.6678	20.7408	21.2449	21.2495	20.704				-1	8	8	8	17.1	17.1	17.1	65.395	0	60.351	25174000	24	32	AT1G20110.1	AT1G20110.1	66
17.3519	NaN	NaN	23.5951	23.5482	23.5197				-1	35	35	35	34.7	34.7	34.7	109.82	0	323.31	232010000	54	100	AT1G20760.1	AT1G20760.1	69
18.1245	17.4991	17.2049	24.4553	24.3627	24.246				-1	59	59	59	60.2	60.2	60.2	131.85	0	323.31	428540000	63	169	AT1G21630.1;AT1G21630.3;AT1G21630.2;AT1G21630.4	AT1G21630.1;AT1G21630.3;AT1G21630.2;AT1G21630.4	71
NaN	20.219	20.7039	20.5538	20.7821	20.7336				-1	5	5	5	8.1	8.1	8.1	88.249	0	39.664	12330000	33	17	AT1G21700.1	AT1G21700.1	72
21.7817	21.5909	21.65	21.9492	22.2619	22.229				-1	6	6	6	37.5	37.5	37.5	17.545	0	79.575	41160000	8	24	AT4G09800.1;AT1G34030.1;AT1G22780.1	AT4G09800.1;AT1G34030.1;AT1G22780.1	74
21.3824	21.138	21.4609	21.0936	21.0559	21.1379				-1	5	5	5	64.9	64.9	64.9	10.546	0	42.586	32837000	7	24	AT1G23100.1	AT1G23100.1	77
21.5757	21.4984	21.3912	21.3546	21.1248	21.0465				-1	7	7	7	25.4	25.4	25.4	35.759	0	75.596	33837000	15	30	AT1G23280.1	AT1G23280.1	80
23.4192	22.9538	23.5715	23.0227	23.2363	23.3861				-1	9	9	9	32.5	32.5	32.5	17.797	0	110.59	166770000	7	55	AT3G62250.1;AT2G47110.1;AT1G23410.1;AT2G47110.2;AT4G05320.2;AT5G20620.1;AT4G05320.3;AT4G05320.6;AT3G52590.1;AT2G36170.1;AT4G05320.4;AT1G65350.1;AT5G03240.1;AT5G03240.3;AT5G20620.2;AT5G03240.2;AT4G05320.5;AT4G05320.1;AT4G02890.4;AT4G02890.3;AT4G05320.8;AT4G05050.4;AT4G05320.7;AT2G35635.1;AT1G31340.1;AT5G37640.1;AT4G02890.1;AT4G02890.2;AT4G05050.1;AT4G05050.2;AT4G05050.3;AT1G55060.1;AT3G09790.1;AT3…	AT3G62250.1;AT2G47110.1;AT1G23410.1;AT2G47110.2;AT4G05320.2;AT5G20620.1;AT4G05320.3;AT4G05320.6;AT3G52590.1;AT2G36170.1;AT4G05320.4;AT1G65350.1;AT5G03240.1;AT5G03240.3;AT5G20620.2;AT5G03240.2;AT4G05320.5;AT4G05320.1;AT4G02890.4;AT4G02890.3;AT4G05320.8;AT4G05050.4;AT4G05320.7;AT2G35635.1;AT1G31340.1;AT5G37640.1;AT4G02890.1;AT4G02890.2;AT4G05050.1;AT4G05050.2;AT4G05050.3;AT1G55060.1;AT3G09790.1;AT3…	82
20.7091	21.1578	20.6922	20.399	20.6247	20.4885				-1	6	6	6	56.9	56.9	56.9	20.491	0	67.251	16772000	10	21	AT1G24050.1	AT1G24050.1	83
21.5377	21.5798	21.962	22.4383	21.8525	22.194				-1	46	46	38	50	50	41.4	166.27	0	323.31	183340000	77	159	AT1G24300.1;AT1G24300.2;AT1G24300.3	AT1G24300.1;AT1G24300.2;AT1G24300.3	85
22.7835	22.949	22.6394	22.1076	22.4735	23.848				-1	6	6	6	18.9	18.9	18.9	59.384	0	181.31	58107000	30	19	AT1G24510.1;AT1G24510.2;AT1G24510.3;AT1G67760.1	AT1G24510.1;AT1G24510.2;AT1G24510.3	86
25.4626	25.568	25.4077	24.9089	25.1308	25.1548				-1	16	16	16	23.1	23.1	23.1	63.66	0	323.31	679560000	17	115	AT1G26110.2;AT1G26110.1	AT1G26110.2;AT1G26110.1	87
NaN	23.953	23.9225	24.1064	24.3646	23.9823				-1	6	6	4	36.5	36.5	27	17.14	0	104.41	107200000	10	32	AT1G26630.1;AT1G26630.2	AT1G26630.1;AT1G26630.2	89
21.7059	21.5771	22.0143	21.1204	21.6559	20.9503				-1	8	8	8	29.5	29.5	29.5	46.018	0	97.495	25550000	23	24	AT1G27090.1	AT1G27090.1	90
20.1451	19.6509	21.6543	22.6058	19.889	21.7037				-1	31	23	23	38.5	29.8	29.8	165.43	0	211.48	51485000	81	55	AT1G27430.1;AT1G27430.2;AT1G27430.3	AT1G27430.1;AT1G27430.2;AT1G27430.3	92
20.8012	20.2139	20.7223	20.9133	20.5594	20.8861				-1	5	5	5	46.9	46.9	46.9	14.574	0	38.378	16489000	9	16	AT1G29250.1;AT2G34160.1	AT1G29250.1	94
20.5231	20.4043	20.5959	20.6868	20.4233	20.3271				-1	6	6	1	8.9	8.9	1.9	90.878	0	45.12	20743000	22	19	AT1G29350.1	AT1G29350.1	95
22.0906	21.8243	21.711	21.5877	21.5821	21.7662				-1	8	4	4	45.5	32	32	25.132	0	33.97	35253000	11	21	AT1G30230.1;AT1G30230.2	AT1G30230.1;AT1G30230.2	96
24.9407	24.9038	24.9226	25.3793	25.0535	24.9916				-1	16	16	16	40.8	40.8	40.8	42.318	0	257.19	497300000	22	112	AT1G30480.1	AT1G30480.1	97
NaN	NaN	NaN	19.8658	19.8392	19.7052				-1	4	4	4	42	42	42	12.296	0	25.692	5613700	6	12	AT1G31760.1	AT1G31760.1	103
20.6895	NaN	20.8271	NaN	21.1659	NaN				-1	3	3	3	33.7	33.7	33.7	10.386	0	22.867	12217000	6	13	AT1G31812.1	AT1G31812.1	104
NaN	19.8748	19.7698	19.6944	20.06	19.8412				-1	5	5	5	8.7	8.7	8.7	80.438	0	30.566	7003600	33	15	AT1G33680.1;AT4G10070.1	AT1G33680.1	108
27.1337	27.51	27.2183	27.3159	27.2246	27.2896				-1	39	39	39	51.7	51.7	51.7	68.958	0	323.31	6764600000	32	401	AT1G34220.2;AT1G34220.1	AT1G34220.2;AT1G34220.1	110
NaN	20.9339	20.6096	20.6741	20.5053	NaN				-1	2	2	2	6.2	6.2	6.2	48.306	0	20.646	12954000	23	14	AT1G34430.1	AT1G34430.1	112
20.0547	NaN	20.321	NaN	20.2699	NaN				-1	6	2	2	28.1	12.4	12.4	30.194	0	14.965	4699800	18	6	AT1G35160.1;AT1G35160.2	AT1G35160.1;AT1G35160.2	113
21.7691	21.7005	21.881	21.6338	21.7439	21.8823				-1	6	5	3	25.1	25.1	25.1	28.526	0	63.738	38980000	11	30	AT1G35460.1;AT1G35460.2	AT1G35460.1	114
23.6318	23.5709	23.5456	23.6557	23.5857	23.6084				-1	42	26	26	23.2	13.5	13.5	251.38	0	323.31	267270000	123	107	AT1G36160.2;AT1G36160.1	AT1G36160.2;AT1G36160.1	116
25.0158	24.8741	24.8382	24.8462	25.0755	25.0704				-1	74	74	58	34.1	34.1	26.2	262.73	0	323.31	1260400000	125	336	AT1G36180.1;AT1G36180.2;AT1G36180.3	AT1G36180.1	117
20.5076	20.2886	NaN	NaN	20.443	NaN				-1	4	4	4	12.2	12.2	12.2	31.223	0	22.837	11032000	18	12	AT1G36390.2;AT1G36390.1	AT1G36390.2;AT1G36390.1	118
21.3822	21.1579	21.3445	NaN	21.4008	20.919				-1	3	3	3	16.1	16.1	16.1	17.829	0	23.689	17203000	9	13	AT1G42960.1	AT1G42960.1	119
NaN	19.7931	19.4975	19.6884	19.7432	19.5105				-1	6	6	6	22.9	22.9	22.9	37.791	0	47.01	8246700	15	18	AT1G43700.1	AT1G43700.1	122
23.2933	23.181	23.3243	22.8518	23.2222	23.127				-1	20	20	20	35.9	35.9	35.9	58.773	0	193.05	170130000	31	93	AT1G48920.1;AT3G18610.2;AT3G18610.3;AT3G18610.1	AT1G48920.1	131
28.9574	29.3096	28.8183	28.9923	28.7059	28.8276				-1	24	24	15	40.7	40.7	31	48.483	0	323.31	8243500000	13	215	AT1G49600.1;AT1G49600.3;AT1G49600.2;AT1G47490.2;AT1G47500.2;AT1G47490.1;AT1G47500.1	AT1G49600.1;AT1G49600.3;AT1G49600.2	133
22.1907	21.8687	21.9768	21.9364	22.0773	22.1435				-1	27	26	25	46.5	45.5	41.6	72.779	0	223.94	130320000	31	92	AT1G49760.2;AT1G49760.1	AT1G49760.2;AT1G49760.1	134
20.5388	NaN	20.2839	20.3392	20.294	20.2514				-1	7	7	7	13.6	13.6	13.6	110.49	0	46.816	11210000	54	15	AT1G50200.1;AT1G50200.2	AT1G50200.1;AT1G50200.2	135
22.0375	22.2936	22.1795	22.4042	22.5151	22.2149				-1	9	9	9	36.7	36.7	36.7	41.716	0	87.437	60384000	18	41	AT1G51140.1	AT1G51140.1	140
NaN	NaN	20.2809	20.2072	20.2119	20.4976				-1	2	2	2	7.7	7.7	7.7	43.582	0	15.045	8854200	18	8	AT1G51560.1	AT1G51560.1	143
NaN	NaN	NaN	19.663	19.7656	20.1272				-1	4	4	4	9.2	9.2	9.2	67.114	0	26.373	5388200	34	9	AT1G51580.1	AT1G51580.1	144
24.498	24.3305	24.5335	24.5077	24.1096	24.3392				-1	12	12	11	35.1	35.1	35.1	33.129	0	114.77	259650000	10	67	AT1G51600.2;AT1G51600.1;AT3G21175.3;AT3G21175.2	AT1G51600.2;AT1G51600.1	145
21.219	20.7725	21.0358	NaN	NaN	NaN				-1	4	4	4	10.7	10.7	10.7	54.401	0	32.273	13165000	24	11	AT1G51980.1;AT1G51980.2	AT1G51980.1	150
NaN	NaN	19.9879	19.7454	19.8927	20.1408				-1	2	2	2	2.2	2.2	2.2	104.22	0	24.519	5565600	48	11	AT1G52360.3;AT1G52360.4;AT1G52360.1;AT1G52360.2;AT3G15980.1;AT3G15980.7;AT3G15980.6;AT3G15980.4;AT3G15980.3;AT3G15980.2;AT3G15980.5	AT1G52360.3;AT1G52360.4;AT1G52360.1;AT1G52360.2;AT3G15980.1;AT3G15980.7;AT3G15980.6;AT3G15980.4;AT3G15980.3;AT3G15980.2;AT3G15980.5	152
30.7574	31.1132	30.6988	30.628	30.5902	30.5675				-1	19	19	18	62.4	62.4	60.6	29.573	0	323.31	35854000000	12	378	AT1G52670.1	AT1G52670.1	154
22.7524	22.8749	22.7664	22.3885	23.0113	22.8545				-1	10	10	9	38.4	38.4	35.2	35.804	0	127.48	85167000	15	43	AT1G53240.1;AT3G15020.2;AT3G15020.1	AT1G53240.1	157
22.9762	23.0976	22.6014	22.763	22.7003	22.7227				-1	7	7	7	39.3	39.3	39.3	20.597	0	84.905	71427000	9	24	AT1G54140.1	AT1G54140.1	160
21.7897	21.7945	21.9175	22.1522	21.9971	21.9698				-1	20	20	20	37.6	37.6	37.6	65.389	0	154.24	106470000	33	78	AT1G54170.1;AT3G14010.4;AT3G14010.3;AT3G14010.2;AT3G14010.1;AT3G14010.5	AT1G54170.1	161
23.1654	23.3135	23.5009	23.215	23.2967	23.5094				-1	8	8	3	24	24	6.6	46.762	0	69.672	82461000	23	40	AT1G54270.1;AT1G54270.2	AT1G54270.1;AT1G54270.2	162
21.3527	20.8843	21.1594	21.4892	21.0163	20.8598				-1	12	12	8	20.2	20.2	15.2	59.135	0	96.099	44170000	22	45	AT1G54360.4;AT1G54360.6	AT1G54360.4;AT1G54360.6	164
22.0465	21.5306	21.7562	NaN	21.513	NaN				-1	3	3	2	27.9	27.9	16.9	14.65	0	61.038	22256000	8	12	AT1G54630.1	AT1G54630.1	166
24.6437	24.1651	24.4469	24.2966	24.6379	24.2956				-1	30	30	30	41	41	41	93.89	0	308.37	364850000	44	131	AT1G56070.3;AT1G56070.2;AT1G56070.1;AT3G12915.2;AT3G12915.1	AT1G56070.3;AT1G56070.2;AT1G56070.1	170
NaN	NaN	NaN	20.1269	20.4214	20.5395				-1	4	4	4	29	29	29	22.03	0	26.186	6977800	13	12	AT4G02080.1;AT3G62560.1;AT1G56330.1;AT1G09180.1	AT4G02080.1;AT3G62560.1;AT1G56330.1;AT1G09180.1	171
20.547	20.732	NaN	20.3919	20.7036	20.3036				-1	5	5	5	12.2	12.2	12.2	48.527	0	43.25	14338000	27	17	AT1G56340.1;AT1G56340.2	AT1G56340.1;AT1G56340.2	172
23.1019	22.8648	22.9009	22.5044	23.0435	22.8734				-1	12	12	9	39	39	26.6	46.4	0	91.494	75305000	18	47	AT1G57720.2;AT1G57720.1	AT1G57720.2;AT1G57720.1	173
23.4024	23.2022	23.332	23.5621	23.4676	23.5048				-1	30	30	30	40.5	40.5	40.5	82.707	0	322.46	310190000	39	127	AT1G62390.1	AT1G62390.1	185
24.5424	24.4548	24.3966	24.9609	24.8767	24.8389				-1	33	33	33	80.3	80.3	80.3	28.912	0	323.31	813400000	16	180	AT1G65260.2;AT1G65260.1	AT1G65260.2;AT1G65260.1	191
22.8021	23.165	22.5586	22.3719	22.2459	22.3421				-1	7	7	7	50	50	50	17.428	0	195.89	81727000	6	38	AT1G65980.1;AT1G65980.2;AT1G65970.1;AT1G60740.1	AT1G65980.1	194
21.8409	21.744	22.0008	21.7465	21.6946	21.6827				-1	5	5	5	71.2	71.2	71.2	7.0731	0	37.746	27945000	4	19	AT1G66240.2;AT1G66240.1	AT1G66240.2;AT1G66240.1	195
20.6219	20.4684	21.0547	21.1449	21.2906	21.2867				-1	5	5	2	23.5	23.5	14.9	24.929	0	39.018	14948000	11	14	AT1G66580.1;AT1G26910.1;AT1G26910.2	AT1G66580.1;AT1G26910.1	196
24.3693	23.9615	24.2259	24.2788	24.296	24.1554				-1	76	76	76	56.9	56.9	56.9	129.09	0	323.31	945320000	54	318	AT1G67230.1	AT1G67230.1	197
23.9011	23.9752	23.7947	24.3147	24.4627	24.2561				-1	7	7	7	36.6	36.6	36.6	26.295	0	70.145	122840000	15	27	AT1G71260.1	AT1G71260.1	205
24.7222	24.6703	24.5714	24.88	25.0819	24.9388				-1	39	38	35	60.7	60.7	57.2	74.422	0	323.31	933370000	33	228	AT1G71770.2;AT1G71770.1	AT1G71770.2;AT1G71770.1	206
21.111	21.2989	21.3627	21.514	21.2452	21.4581				-1	4	4	4	24.5	24.5	24.5	31.981	0	63.834	18440000	14	15	AT1G72370.2;AT1G72370.1;AT3G04770.2;AT3G04770.1	AT1G72370.2;AT1G72370.1	210
23.0177	22.8463	23.0182	23.1017	22.8786	22.8385				-1	47	47	47	48.1	48.1	48.1	143.31	0	323.31	388780000	53	218	AT1G72390.2;AT1G72390.1	AT1G72390.2;AT1G72390.1	211
22.5182	22.5625	22.8286	23.0679	23.1155	22.5321				-1	6	6	1	18.9	18.9	4.3	26.008	0	64.919	80378000	11	28	AT1G74060.1;AT1G74050.1	AT1G74060.1;AT1G74050.1	214
21.5077	21.2385	21.56	21.4016	21.4632	21.1789				-1	6	6	6	26	26	26	28.728	0	81.599	27174000	6	24	AT1G74230.1	AT1G74230.1	215
22.9971	22.3612	23.1465	22.8558	22.8068	22.594				-1	7	7	7	20.6	20.6	20.6	41.178	0	58.304	68710000	20	24	AT1G77120.1	AT1G77120.1	223
23.2748	23.3863	23.1929	23.3147	23.2321	23.2176				-1	20	20	20	30.4	30.4	30.4	88.839	0	311.49	266240000	38	94	AT1G79090.3;AT1G79090.2;AT1G79090.1	AT1G79090.3;AT1G79090.2;AT1G79090.1	225
NaN	20.6141	20.6379	NaN	20.7286	20.4412				-1	6	6	6	24.5	24.5	24.5	41.893	0	55.871	13045000	25	17	AT1G79230.1;AT1G79230.3;AT1G79230.2	AT1G79230.1;AT1G79230.3;AT1G79230.2	226
21.8176	21.7457	21.7416	21.6531	21.7543	21.5713				-1	11	9	4	39.1	36.5	21.3	44.83	0	118.63	52799000	24	33	AT1G79530.1	AT1G79530.1	228
20.2563	20.5589	20.6176	20.0089	20.6604	20.3671				-1	8	8	6	31.9	31.9	31.9	42.131	0	66.978	21196000	25	27	AT1G79550.2;AT1G79550.1	AT1G79550.2;AT1G79550.1	229
26.1622	26.0956	26.183	25.964	26.2326	25.9715				-1	68	68	55	52.9	52.9	46.7	137.24	0	323.31	2010800000	55	443	AT1G79570.2;AT1G79570.1;AT1G79570.5;AT1G79570.4;AT1G79570.3	AT1G79570.2;AT1G79570.1;AT1G79570.5;AT1G79570.4;AT1G79570.3	230
22.6186	22.453	22.7143	22.2559	22.4951	22.4672				-1	20	20	6	22.2	22.2	5.3	87.316	0	165.58	148680000	44	85	AT1G79930.2;AT1G79930.1	AT1G79930.2;AT1G79930.1	232
30.0545	30.143	30.0913	30.0358	30.2733	29.9905				-1	33	33	33	45.3	45.3	45.3	77.337	0	323.31	14688000000	22	334	AT2G01190.1	AT2G01190.1	234
NaN	19.4259	19.6436	19.7741	19.8824	19.5149				-1	2	2	2	8.9	8.9	8.9	27.844	0	14.967	5996500	9	8	AT2G02470.2;AT2G02470.3;AT2G02470.1;AT1G14510.1	AT2G02470.2;AT2G02470.3;AT2G02470.1;AT1G14510.1	237
20.0148	20.1909	20.4145	20.0022	20.4329	20.7976				-1	2	2	2	1.9	1.9	1.9	134.62	0	22.278	9948500	68	12	AT2G02560.2;AT2G02560.1	AT2G02560.2;AT2G02560.1	239
NaN	22.5801	22.6207	23.7076	23.3742	NaN				-1	3	3	3	7.5	7.5	7.5	29.728	0	30.53	47926000	16	12	AT2G02740.1	AT2G02740.1	240
NaN	19.7841	19.6058	19.7017	19.7618	NaN				-1	4	4	4	10.4	10.4	10.4	65.266	0	25.701	6303700	27	13	AT2G02790.3;AT2G02790.2;AT2G02790.1;AT1G14380.7;AT1G14380.6;AT1G14380.5;AT1G14380.2;AT1G14380.4;AT1G14380.3;AT1G14380.1	AT2G02790.3;AT2G02790.2;AT2G02790.1	241
22.6669	23.0895	22.7898	22.6945	NaN	22.5746				-1	3	3	3	42.9	42.9	42.9	11.92	0	51.877	48196000	5	17	AT2G03680.3;AT2G03680.2;AT2G03680.1	AT2G03680.3;AT2G03680.2;AT2G03680.1	246
21.1902	21.1353	21.4441	21.2824	21.2938	21.6056				-1	11	11	11	21.6	21.6	21.6	88.255	0	106.57	35619000	47	35	AT2G04030.2;AT2G04030.1	AT2G04030.2;AT2G04030.1	248
20.5894	NaN	20.7925	NaN	20.8755	20.7943				-1	5	5	5	22.9	22.9	22.9	16.036	0	30.814	14007000	4	16	AT3G10610.1;AT2G05220.2;AT2G05220.1;AT5G04800.4;AT5G04800.3;AT5G04800.2;AT5G04800.1;AT2G04390.1	AT3G10610.1;AT2G05220.2;AT2G05220.1;AT5G04800.4;AT5G04800.3;AT5G04800.2;AT5G04800.1;AT2G04390.1	249
20.7153	20.5449	20.5741	20.8228	20.8535	20.9332				-1	10	10	10	31.3	31.3	31.3	44.577	0	72.796	21534000	27	31	AT2G04400.1	AT2G04400.1	250
21.363	20.7634	21.2423	20.934	21.295	21.2159				-1	11	11	11	11.4	11.4	11.4	108.2	0	68.408	36344000	50	33	AT2G05710.1;AT4G35830.1;AT4G35830.2;AT4G26970.1	AT2G05710.1	252
20.5417	NaN	20.6542	NaN	20.621	NaN				-1	4	4	4	23.6	23.6	23.6	34.275	0	28.887	8238800	20	11	AT2G05830.3;AT2G05830.2;AT2G05830.4;AT2G05830.1	AT2G05830.3;AT2G05830.2;AT2G05830.4;AT2G05830.1	253
20.374	NaN	20.3255	19.9263	20.43	20.2894				-1	5	5	5	29.9	29.9	29.9	22.79	0	57.8	15567000	8	19	AT2G06530.2;AT2G06530.1	AT2G06530.2;AT2G06530.1	255
23.0794	NaN	23.2693	25.182	25.208	24.8979				-1	29	29	29	30.1	30.1	30.1	130.08	0	323.31	322570000	53	84	AT2G07360.1;AT2G07360.2	AT2G07360.1;AT2G07360.2	256
22.4529	22.3166	22.5057	22.2908	22.2614	22.1937				-1	16	16	16	18.3	18.3	18.3	85.932	0	166.14	113900000	32	75	AT2G07698.1	AT2G07698.1	257
21.2271	20.5764	20.9984	20.9314	20.4704	20.795				-1	8	8	8	47.5	47.5	47.5	18.034	0	61.093	21419000	11	24	AT2G16060.1	AT2G16060.1	265
NaN	19.3826	19.0916	NaN	18.9132	NaN				-1	3	3	3	5.5	5.5	5.5	93.655	0	18.53	2845100	43	9	AT2G16440.1	AT2G16440.1	266
20.7193	20.649	21.6268	21.9151	21.4433	21.243				-1	9	9	9	14	14	14	61.842	0	103.84	21533000	24	20	AT2G16570.1;AT4G34740.1;AT4G38880.1	AT2G16570.1;AT4G34740.1	267
22.0067	21.1305	21.5979	21.4691	21.8096	21.5626				-1	7	7	5	41.7	41.7	35.8	15.992	0	91.605	41787000	9	29	AT2G16600.2;AT2G16600.1	AT2G16600.2;AT2G16600.1	268
19.6942	NaN	19.8141	NaN	NaN	19.8882				-1	5	5	5	25	25	25	27.707	0	31.88	9473100	16	13	AT5G07090.3;AT5G07090.2;AT2G17360.1;AT5G58420.1;AT5G07090.1;AT2G17360.2	AT5G07090.3;AT5G07090.2;AT2G17360.1;AT5G58420.1;AT5G07090.1	270
23.9628	23.8409	23.9011	24.2559	23.8428	23.9871				-1	7	7	7	44.7	44.7	44.7	21.815	0	109.8	180910000	11	36	AT2G17850.3;AT2G17850.1;AT2G17850.2	AT2G17850.3;AT2G17850.1;AT2G17850.2	274
21.5985	22.1766	NaN	22.0155	21.6187	22.1337				-1	3	3	3	20.6	20.6	20.6	29.564	0	32.105	21789000	18	11	AT2G17870.1	AT2G17870.1	275
22.4143	22.2667	22.396	22.1865	22.3553	22.4312				-1	21	21	18	8.6	8.6	7.3	436.35	0	165.07	94562000	224	72	AT2G17930.1	AT2G17930.1	276
21.79	21.6396	22.0599	21.7718	21.9952	21.5583				-1	7	7	7	52.1	52.1	52.1	13.015	0	58.923	47346000	9	25	AT2G18040.1	AT2G18040.1	279
21.7214	21.9258	21.5933	21.2601	21.4463	21.5789				-1	9	8	5	45.5	41.1	32	25.266	0	61.154	42986000	11	32	AT2G18110.1	AT2G18110.1	280
20.684	20.9206	20.4854	20.4309	20.1512	NaN				-1	4	4	4	11.2	11.2	11.2	71.194	0	35.868	11927000	38	14	AT2G18330.1	AT2G18330.1	281
22.184	21.9254	21.9549	22.1816	21.9509	21.898				-1	25	25	22	29.3	29.3	26.3	133.36	0	215.67	120190000	53	101	AT2G19390.2;AT2G19390.1	AT2G19390.2;AT2G19390.1	283
21.2887	NaN	21.6375	21.0303	21.5055	21.4544				-1	4	4	4	18	18	18	42.846	0	41.128	19571000	13	14	AT2G19480.3;AT2G19480.2;AT2G19480.1;AT5G56950.1	AT2G19480.3;AT2G19480.2;AT2G19480.1	284
23.4532	23.3142	23.5121	23.3327	23.7558	23.6086				-1	8	8	7	47.6	47.6	38.5	15.895	0	96.799	148500000	7	37	AT2G19730.3;AT2G19730.2;AT2G19730.1	AT2G19730.3;AT2G19730.2;AT2G19730.1	286
21.7696	21.5243	21.462	21.6316	21.3118	21.1724				-1	7	7	7	24.4	24.4	24.4	49.369	0	92.364	39876000	25	32	AT4G29040.1;AT2G20140.1	AT4G29040.1;AT2G20140.1	289
21.5245	21.4509	21.6114	21.2544	21.4808	21.2793				-1	12	12	12	22.6	22.6	22.6	45.345	0	96.658	47054000	28	40	AT2G20420.1	AT2G20420.1	291
27.4515	27.6393	27.3036	27.5002	27.3921	27.3129				-1	21	21	21	71.1	71.1	71.1	30.701	0	323.31	2266000000	15	174	AT2G20550.1;AT2G20550.2;AT2G20560.1	AT2G20550.1;AT2G20550.2	293
20.8493	20.9652	21.1631	NaN	21.1409	21.1491				-1	9	9	9	14.8	14.8	14.8	98.143	0	80.017	24054000	54	25	AT2G20580.1;AT4G28470.1;AT4G08140.1	AT2G20580.1	294
22.0151	NaN	21.8685	22.5967	22.4026	22.5555				-1	7	7	7	15.1	15.1	15.1	37.225	0	45.816	43006000	10	22	AT2G20760.1;AT3G51890.1	AT2G20760.1	295
20.209	20.9239	20.3693	20.9037	20.5732	20.8154				-1	6	6	6	14.6	14.6	14.6	65.371	0	45.856	13453000	29	18	AT2G20800.1	AT2G20800.1	296
NaN	NaN	19.9072	19.8246	19.4933	19.992				-1	5	5	5	12.5	12.5	12.5	56.326	0	39.591	6204200	25	11	AT2G21230.4;AT2G21230.1;AT2G21230.3;AT2G21230.2	AT2G21230.4;AT2G21230.1;AT2G21230.3;AT2G21230.2	301
NaN	NaN	NaN	21.2878	21.2416	21.2984				-1	3	2	1	7.2	4.6	2.3	41.807	0	12.682	10972000	20	5	AT2G21330.3;AT2G21330.1	AT2G21330.3;AT2G21330.1	303
20.5317	20.3064	20.4068	20.5524	20.8439	20.6251				-1	8	8	3	57.9	57.9	21.5	11.941	0	61.536	18351000	6	20	AT2G21580.2;AT2G21580.1	AT2G21580.2;AT2G21580.1	304
22.9515	22.6304	22.8394	22.7278	22.5566	22.6487				-1	11	11	7	53.4	53.4	46	16.89	0	116.27	86817000	12	48	AT2G21660.1;AT2G21660.2	AT2G21660.1;AT2G21660.2	306
20.8976	20.9689	21.2973	20.6105	20.6303	20.773				-1	8	8	8	44.5	44.5	44.5	25.16	0	72.832	23328000	12	26	AT2G21870.2;AT2G21870.1	AT2G21870.2;AT2G21870.1	307
22.5683	22.6184	22.669	22.9031	22.8799	22.6549				-1	13	13	9	19.5	19.5	14	47.761	0	125.53	95591000	24	48	AT2G22360.1	AT2G22360.1	309
25.5358	25.1613	25.4062	25.5175	25.6477	25.5931				-1	42	42	40	53.9	53.9	52.9	71.652	0	323.31	1405800000	30	242	AT2G23350.1	AT2G23350.1	310
24.2689	24.3457	24.1936	24.6168	24.4406	24.2574				-1	13	13	13	77.8	77.8	77.8	13.026	0	151.64	411940000	6	91	AT2G25720.1	AT2G25720.1	315
20.4105	20.5789	20.8319	NaN	20.511	20.3731				-1	6	6	6	14.1	14.1	14.1	64.606	0	52.855	15233000	19	16	AT2G25970.1	AT2G25970.1	316
22.405	21.8475	22.1206	21.9388	22.0955	22.0264				-1	14	14	14	32	32	32	60.757	0	187.52	91536000	32	47	AT2G27200.1;AT1G08410.1	AT2G27200.1	317
21.0229	21.3745	21.3983	21.221	21.3051	21.3451				-1	9	9	9	29.4	29.4	29.4	48.592	0	69.179	30701000	28	32	AT2G27600.1	AT2G27600.1	318
21.1987	NaN	NaN	NaN	21.0687	21.0491				-1	5	5	2	52.2	52.2	40	11.452	0	42.714	14502000	5	15	AT2G27720.1;AT2G27720.3;AT2G27720.2;AT2G27720.4	AT2G27720.1;AT2G27720.3;AT2G27720.2;AT2G27720.4	320
NaN	20.5863	20.5186	20.1505	20.4999	20.4288				-1	2	2	2	26.5	26.5	26.5	11.947	0	17.132	7673700	5	10	AT2G27730.4;AT2G27730.3;AT2G27730.2;AT2G27730.1	AT2G27730.4;AT2G27730.3;AT2G27730.2;AT2G27730.1	321
20.9635	21.3607	21.3762	20.8165	21.2251	21.2401				-1	16	16	16	30	30	30	62.071	0	156.35	46798000	31	57	AT2G28000.1	AT2G28000.1	322
23.5791	23.1639	23.5154	23.4717	23.4929	23.4973				-1	19	19	5	44.3	44.3	15.1	50.747	0	259.82	196920000	21	75	AT2G29550.1;AT5G23860.2;AT5G23860.1;AT1G75780.1	AT2G29550.1;AT5G23860.2;AT5G23860.1	327
20.4245	NaN	18.9364	19.8448	NaN	19.6628				-1	2	2	2	10.9	10.9	10.9	27.458	0	23.304	6442800	16	12	AT5G35530.1;AT3G53870.1;AT2G31610.1	AT5G35530.1;AT3G53870.1;AT2G31610.1	329
21.8685	21.977	21.7303	21.9808	21.5296	21.9202				-1	6	6	6	30.7	30.7	30.7	31.369	0	50.138	27633000	13	20	AT2G32600.1	AT2G32600.1	333
21.161	21.354	NaN	20.7552	20.6313	NaN				-1	2	2	2	2.7	2.7	2.7	108.98	0	18.479	11364000	38	10	AT2G32730.1	AT2G32730.1	335
23.6413	23.8503	23.6787	23.098	23.1921	23.1206				-1	29	28	27	27.7	27	26.3	139.7	0	323.31	407850000	53	142	AT2G35050.2;AT2G35050.1	AT2G35050.2;AT2G35050.1	338
22.9518	22.8774	22.8284	22.9278	23.151	22.9788				-1	8	8	8	23.1	23.1	23.1	44.686	0	84.892	72568000	16	29	AT2G35230.1;AT2G35230.3;AT2G35230.2	AT2G35230.1;AT2G35230.3	340
24.5773	24.0734	24.3523	24.1115	24.4519	24.3312				-1	21	21	21	58.7	58.7	58.7	42.687	0	323.31	297770000	19	93	AT2G35500.1	AT2G35500.1	341
23.9296	23.5791	23.9172	23.6075	23.739	23.6383				-1	26	26	13	71.8	71.8	50.3	38.386	0	293.3	383480000	23	134	AT2G36460.1;AT2G36460.3;AT2G36460.2	AT2G36460.1;AT2G36460.3;AT2G36460.2	347
23.1715	22.9206	23.0269	23.0821	22.9655	23.0642				-1	6	6	6	39.8	39.8	39.8	17.942	0	69.103	125050000	9	37	AT2G37190.1;AT3G53430.1;AT5G60670.1	AT2G37190.1;AT3G53430.1;AT5G60670.1	349
NaN	20.5476	20.9598	20.9076	NaN	21.0884				-1	4	4	2	26.1	26.1	15.5	22.99	0	30.62	11076000	11	10	AT2G37270.2;AT2G37270.1	AT2G37270.2;AT2G37270.1	351
21.355	22.166	21.7673	22.2149	22.5436	22.3143				-1	14	3	2	42.2	11.7	9	41.797	0	30.396	37134000	21	15	AT3G53750.2;AT3G53750.1;AT2G37620.4;AT2G37620.3;AT2G37620.2;AT2G37620.1	AT3G53750.2;AT3G53750.1;AT2G37620.4;AT2G37620.3;AT2G37620.2;AT2G37620.1	352
22.2324	22.3755	22.748	23.1664	22.5771	22.8635				-1	9	9	9	27.7	27.7	27.7	34.307	0	136.27	128440000	12	52	AT2G38250.1	AT2G38250.1	355
24.1492	24.1312	24.2505	24.3901	24.4702	24.3977				-1	16	16	16	40.4	40.4	40.4	35.647	0	245.86	611130000	14	128	AT2G39050.1	AT2G39050.1	358
20.8937	20.6775	20.9359	21.0616	20.5274	20.5014				-1	7	7	7	25.6	25.6	25.6	48.5	0	79.012	22425000	19	23	AT2G39730.3;AT2G39730.2;AT2G39730.1	AT2G39730.3;AT2G39730.2;AT2G39730.1	360
21.1798	21.0421	20.6498	20.6964	NaN	NaN				-1	3	3	3	18.4	18.4	18.4	18.411	0	32.979	12832000	4	12	AT2G41430.5;AT2G41430.4;AT2G41430.2;AT2G41430.1;AT2G41430.3	AT2G41430.5;AT2G41430.4;AT2G41430.2;AT2G41430.1;AT2G41430.3	367
NaN	NaN	22.2516	22.2723	22.0405	22.24				-1	4	4	2	19.3	19.3	9.8	30.878	0	39.733	26862000	16	13	AT2G41840.1	AT2G41840.1	368
26.5259	26.1171	26.3353	26.4736	26.0906	26.5024				-1	32	32	17	47.4	47.4	31	67.625	0	323.31	2051600000	34	207	AT2G42520.3;AT2G42520.2;AT2G42520.1;AT5G14610.4;AT5G14610.7;AT5G14610.3;AT3G01540.1;AT3G01540.4;AT3G01540.3;AT3G01540.2;AT5G14610.6;AT5G14610.2;AT5G14610.5;AT5G14610.1;AT3G06480.2;AT3G06480.1	AT2G42520.3;AT2G42520.2;AT2G42520.1	371
22.1937	NaN	21.8546	NaN	22.5565	NaN				-1	3	3	3	25.4	25.4	25.4	19.791	0	30.847	26360000	9	9	AT2G42610.2;AT2G42610.1;AT1G16910.1;AT5G58500.1;AT5G28490.1;AT4G18610.1;AT3G23290.2;AT1G78815.1;AT1G07090.1;AT3G04510.1;AT2G31160.1	AT2G42610.2;AT2G42610.1	373
19.7867	NaN	19.8576	NaN	19.9498	19.8329				-1	6	6	6	15.9	15.9	15.9	54.702	0	46.367	8593300	27	16	AT2G42810.5;AT2G42810.4;AT2G42810.1;AT2G42810.3;AT2G42810.2	AT2G42810.5;AT2G42810.4;AT2G42810.1;AT2G42810.3;AT2G42810.2	376
20.9818	NaN	20.7921	NaN	NaN	21.0825				-1	4	4	4	19.5	19.5	19.5	26.79	0	32.124	11305000	16	11	AT2G43090.1;AT2G43090.2	AT2G43090.1;AT2G43090.2	378
21.0362	21.3907	21.1999	21.3876	21.0035	21.3182				-1	17	2	2	64.2	13.2	13.2	23.387	0	65.443	17810000	11	12	AT2G43140.1	AT2G43140.1	379
25.9357	25.6661	25.8627	25.8789	25.9585	25.6608				-1	21	21	6	72.2	72.2	37.2	33.803	0	323.31	1137400000	14	171	AT2G43140.2;AT2G42280.1;AT2G42280.3	AT2G43140.2	380
22.7721	23.2908	23.27	23.4203	22.7848	23.1517				-1	7	7	7	33.5	33.5	33.5	36.036	0	71.143	67546000	23	25	AT2G44060.2;AT2G44060.1	AT2G44060.2;AT2G44060.1	383
22.3111	21.9796	22.2597	22.1946	22.334	22.1997				-1	4	4	2	9.5	9.5	9.1	27.939	0	28.76	40060000	14	20	AT2G44120.1;AT2G44120.2	AT2G44120.1;AT2G44120.2	384
20.41	NaN	20.9026	NaN	20.5919	20.4247				-1	4	4	4	9.9	9.9	9.9	52.654	0	30.627	11180000	23	11	AT2G44350.4;AT2G44350.1;AT2G44350.3;AT2G44350.2	AT2G44350.4;AT2G44350.1;AT2G44350.3;AT2G44350.2	385
20.702	22.926	20.8126	NaN	NaN	NaN				-1	1	1	1	9.8	9.8	9.8	13.717	0	25.252	14664000	5	8	AT2G44620.1	AT2G44620.1	386
NaN	NaN	20.6599	20.2196	20.4887	NaN				-1	3	3	2	30.2	30.2	23.7	15.049	0	22.592	8252900	8	9	AT2G44650.1	AT2G44650.1	387
20.0943	19.8709	20.4025	19.2796	20.1621	20.0014				-1	7	7	5	11.5	11.5	10	79.921	0	51.029	16668000	33	24	AT2G45290.2;AT2G45290.1	AT2G45290.2;AT2G45290.1	389
NaN	20.1	20.0085	19.9007	19.8485	19.653				-1	5	5	5	10.7	10.7	10.7	85.763	0	37.21	8525100	34	15	AT2G45620.1	AT2G45620.1	390
21.6196	21.7146	21.8695	21.7767	21.7057	21.6814				-1	27	27	27	20.3	20.3	20.3	245.44	0	251.84	98461000	106	102	AT2G46020.6;AT2G46020.5;AT2G46020.1;AT2G46020.4;AT2G46020.3;AT2G46020.2	AT2G46020.6;AT2G46020.5;AT2G46020.1;AT2G46020.4;AT2G46020.3;AT2G46020.2	393
NaN	20.0916	20.3991	19.706	20.1205	19.8568				-1	6	4	4	25	20.3	20.3	29.425	0	28.428	9319300	14	12	AT3G01280.1	AT3G01280.1	401
NaN	NaN	NaN	21.9535	21.3594	21.1854				-1	4	4	4	14.9	14.9	14.9	55.492	0	35.61	17870000	23	12	AT3G01560.1	AT3G01560.1	403
NaN	NaN	NaN	23.0739	23.3848	23.0706				-1	40	40	40	32.7	32.7	32.7	130.91	0	323.31	224420000	63	116	AT3G01780.1;AT3G01780.2	AT3G01780.1;AT3G01780.2	404
22.1542	22.2298	NaN	22.2574	22.3064	NaN				-1	6	6	6	15.1	15.1	15.1	58.927	0	61.108	27319000	29	13	AT5G16070.1;AT3G02530.1	AT5G16070.1;AT3G02530.1	408
21.5868	21.2375	21.5889	21.2133	21.2199	21.7242				-1	8	8	8	26.2	26.2	26.2	58.939	0	77.508	28679000	32	30	AT3G03960.1	AT3G03960.1	412
25.9034	25.2637	25.7717	25.3502	25.5248	25.4698				-1	30	30	4	74	74	13.6	36.914	0	323.31	839680000	21	156	AT3G04120.1	AT3G04120.1	413
23.1073	23.0218	22.8791	22.7974	23.0513	23.267				-1	7	7	4	29.4	29.4	19.1	29.85	0	73.937	73183000	15	23	AT3G04840.1	AT3G04840.1	416
19.8556	NaN	19.8807	19.9161	19.8638	19.8937				-1	4	4	2	42.9	42.9	25.9	12.909	0	28.971	9800800	5	14	AT3G04920.2;AT3G04920.1	AT3G04920.2;AT3G04920.1	418
21.3685	20.9792	21.2844	20.9798	21.0919	21.4443				-1	11	11	10	37	37	37	47.48	0	108.95	44788000	25	36	AT3G05530.1;AT1G09100.1;AT1G45000.2;AT4G27680.1;AT1G45000.1;AT5G53540.1	AT3G05530.1;AT1G09100.1	420
21.7286	21.9928	21.5966	21.8281	21.415	NaN				-1	6	6	6	40.3	40.3	40.3	21.445	0	65.647	32851000	12	21	AT3G06050.1;AT3G06050.2	AT3G06050.1	422
NaN	22.0449	21.3391	20.9209	21.8329	21.625				-1	3	3	2	9.9	9.9	8.1	65.813	0	54.773	25122000	32	16	AT3G06650.2;AT3G06650.1	AT3G06650.2;AT3G06650.1	424
23.1067	22.7837	22.8035	23.046	22.8156	23.2052				-1	6	6	6	27.2	27.2	27.2	35.993	0	122.18	47048000	20	25	AT3G07220.1	AT3G07220.1	429
28.2943	28.526	28.3229	28.6652	28.3551	28.2642				-1	51	51	51	50.1	50.1	50.1	90.075	0	323.31	11370000000	32	518	AT3G07660.1	AT3G07660.1	432
20.3189	NaN	20.4579	NaN	20.1592	NaN				-1	6	6	6	13.6	13.6	13.6	90.566	0	55.324	9593400	47	15	AT3G07770.3;AT3G07770.2;AT3G07770.1	AT3G07770.3;AT3G07770.2;AT3G07770.1	433
21.1032	21.6091	21.4042	22.4742	22.4999	22.5074				-1	18	18	18	12	12	12	193.27	0	135.2	63308000	88	54	AT3G08530.1;AT3G11130.1	AT3G08530.1;AT3G11130.1	435
22.6517	23.0254	22.0439	21.8637	22.465	22.4152				-1	6	3	3	17.8	11.5	11.5	41.475	0	52.789	45596000	22	21	AT3G08580.2;AT3G08580.1	AT3G08580.2;AT3G08580.1	436
NaN	NaN	NaN	19.9238	20.3024	21.0831				-1	2	2	2	3.1	3.1	3.1	94.127	0	26.067	6300200	34	9	AT3G08943.1	AT3G08943.1	438
22.4494	22.4927	22.1332	22.3594	22.5207	22.3478				-1	11	11	11	44.4	44.4	44.4	34.133	0	113.56	81413000	9	42	AT3G09200.1;AT3G09200.2;AT3G11250.1;AT2G40010.1	AT3G09200.1;AT3G09200.2;AT3G11250.1;AT2G40010.1	439
23.8368	23.8401	23.801	23.7349	23.85	23.9062				-1	45	17	15	51.3	22.3	16.6	71.147	0	279.38	320060000	37	97	AT3G09440.4;AT3G09440.3;AT3G09440.2;AT3G09440.1	AT3G09440.4;AT3G09440.3;AT3G09440.2;AT3G09440.1	441
22.6986	22.801	22.5684	22.6787	22.5497	22.6742				-1	11	11	9	21.9	21.9	15.5	44.702	0	141.78	60307000	19	41	AT3G09630.1;AT3G09630.2	AT3G09630.1;AT3G09630.2	442
NaN	20.1176	20.5265	20.9615	20.7541	20.621				-1	4	4	4	27.5	27.5	27.5	15.735	0	26.765	12610000	6	15	AT5G02960.1;AT3G09680.1	AT5G02960.1;AT3G09680.1	443
22.1843	21.5615	21.7814	21.2864	21.6216	21.4321				-1	4	4	4	21.9	21.9	21.9	33.326	0	53.743	30256000	17	19	AT3G09820.2;AT3G09820.1;AT5G03300.3;AT5G03300.2;AT5G03300.1	AT3G09820.2;AT3G09820.1;AT5G03300.3;AT5G03300.2;AT5G03300.1	444
23.739	23.5815	23.7823	23.3956	23.7096	23.7292				-1	53	53	14	52	52	20.6	89.392	0	323.31	691050000	43	278	AT3G09840.1;AT3G53230.1	AT3G09840.1;AT3G53230.1	445
19.5763	NaN	NaN	19.9234	NaN	19.5152				-1	4	4	4	9.6	9.6	9.6	57.709	0	24.098	6384400	23	12	AT3G10070.1	AT3G10070.1	446
20.3248	20.4835	20.4484	21.4097	20.6673	21.3872				-1	6	6	6	65.6	65.6	65.6	7.3705	0	44.443	17213000	2	16	AT3G10090.1;AT5G03850.1;AT5G64140.1	AT3G10090.1;AT5G03850.1	448
22.6108	22.3755	22.527	22.2489	22.5424	22.5005				-1	6	6	1	41.3	41.3	7.3	16.273	0	46.978	50947000	6	27	AT3G11510.1	AT3G11510.1	457
21.3209	21.146	21.2474	20.7495	20.9723	21.0124				-1	7	7	7	18.1	18.1	18.1	70.887	0	104.46	22123000	33	20	AT3G11710.1	AT3G11710.1	458
20.1598	NaN	20.2384	NaN	19.5812	20.0946				-1	4	4	4	8.1	8.1	8.1	59.776	0	29.338	7570100	33	13	AT3G11830.1;AT3G11830.2	AT3G11830.1;AT3G11830.2	460
22.7361	22.4407	22.7058	22.7695	22.6884	22.4197				-1	33	6	5	41.8	10.8	8.6	71.101	0	68.321	85244000	37	32	AT3G12580.1	AT3G12580.1	466
20.1851	19.9572	20.1903	NaN	NaN	19.798				-1	6	5	3	19.8	16.2	10.2	50.111	0	36.257	10246000	33	15	AT3G12780.1	AT3G12780.1	467
21.7352	21.7869	22.0076	21.4345	21.1092	21.7859				-1	11	11	11	41.9	41.9	41.9	37.864	0	130.64	53097000	20	44	AT3G13224.2;AT3G13224.1;AT3G13224.3	AT3G13224.2;AT3G13224.1;AT3G13224.3	470
19.7552	20.0262	19.9687	20.2423	20.2747	20.1028				-1	15	15	10	14.4	14.4	10.5	145.72	0	107.15	22734000	72	46	AT3G13300.1;AT3G13300.2;AT3G13300.3	AT3G13300.1;AT3G13300.2;AT3G13300.3	471
20.6435	20.6877	20.4946	20.8637	20.5528	20.925				-1	8	8	7	19.2	19.2	17.2	72.474	0	76.425	22034000	28	26	AT3G13460.1;AT3G13460.3;AT3G13460.2;AT3G13460.4;AT1G55500.1;AT1G55500.6;AT1G55500.3;AT1G55500.4;AT1G55500.2;AT1G55500.5	AT3G13460.1;AT3G13460.3;AT3G13460.2;AT3G13460.4	472
21.5637	21.814	21.7374	21.482	21.3545	21.4193				-1	22	22	5	49.5	49.5	14.6	63.341	0	216.65	77614000	34	77	AT3G13470.1	AT3G13470.1	473
NaN	NaN	NaN	21.6282	21.2828	21.2786				-1	7	2	2	28.6	11.2	11.2	46.704	0	17.73	13514000	23	10	AT3G13920.1;AT3G13920.4;AT3G13920.2;AT3G13920.3;AT3G13920.5;AT1G72730.1	AT3G13920.1;AT3G13920.4;AT3G13920.2;AT3G13920.3;AT3G13920.5;AT1G72730.1	474
20.4803	20.4021	20.5716	20.0004	20.2739	20.4307				-1	5	5	5	11.9	11.9	11.9	58.467	0	40.73	16348000	32	22	AT3G13930.1	AT3G13930.1	475
20.2822	20.089	20.5206	20.0163	20.3168	20.2771				-1	5	5	5	13.9	13.9	13.9	42.869	0	33.533	15970000	19	23	AT3G15000.1;AT1G53260.2;AT1G53260.1	AT3G15000.1	480
21.1306	NaN	21.2063	21.0981	20.9468	21.1471				-1	3	3	3	20.7	20.7	20.7	18.734	0	31.772	18935000	13	13	AT3G15660.2;AT3G15660.1	AT3G15660.2;AT3G15660.1	481
28.5048	28.5352	28.4777	28.8297	28.8645	28.5147				-1	8	7	7	23.6	19.8	19.8	28.169	0	142.18	2373200000	10	55	AT3G15690.2;AT3G15690.1;AT3G15690.3	AT3G15690.2;AT3G15690.1;AT3G15690.3	482
19.6329	NaN	19.766	20.7434	20.2997	NaN				-1	2	2	2	16.7	16.7	16.7	18.91	0	17.325	8013000	9	7	AT3G16640.1	AT3G16640.1	483
23.1697	22.9193	23.3169	23.0789	23.2107	23.2574				-1	11	11	4	41.5	41.5	22.9	42.795	0	125.84	214510000	20	74	AT3G17390.1	AT3G17390.1	488
22.071	21.5748	21.6798	21.209	21.5598	21.3596				-1	5	5	3	24.6	24.6	17.2	38.594	0	121.74	20234000	15	15	AT3G17820.1	AT3G17820.1	489
21.2567	20.3578	21.0023	20.855	20.8532	20.5836				-1	8	8	8	16.8	16.8	16.8	57.775	0	56.29	21035000	33	24	AT3G18190.1	AT3G18190.1	492
24.9112	25.1104	24.7889	24.7115	24.844	24.7671				-1	21	12	12	41.4	31.5	31.5	48.118	0	323.31	580410000	14	97	AT3G19130.1	AT3G19130.1	495
21.5729	21.7704	21.9899	21.8061	21.1807	NaN				-1	7	7	7	17.5	17.5	17.5	85.645	0	125.62	27443000	38	20	AT3G22270.1	AT3G22270.1	502
NaN	19.8959	20.2104	20.356	20.6387	20.1343				-1	10	6	6	21.3	14.6	14.6	63.609	0	55.105	15242000	29	23	AT3G22310.1;AT3G22310.2	AT3G22310.1;AT3G22310.2	503
21.7679	21.9507	22.07	22.0787	21.6429	22.1512				-1	15	15	11	30.8	30.8	24.2	65.359	0	117.99	72239000	38	61	AT3G22330.1	AT3G22330.1	504
21.71	22.0908	21.9768	21.4847	21.7362	21.6393				-1	13	13	13	30.5	30.5	30.5	67.57	0	115.97	49760000	28	36	AT3G22520.1	AT3G22520.1	507
NaN	NaN	19.6442	19.6418	19.772	19.6843				-1	6	4	3	20.3	16	11.4	51.458	0	27.314	6377200	27	13	AT3G22890.1	AT3G22890.1	510
NaN	NaN	23.6052	23.8667	23.9179	24.1779				-1	3	3	3	66.7	66.7	66.7	10.177	0	63.699	54506000	5	14	AT3G23325.1;AT4G14342.1;AT4G14342.2	AT3G23325.1;AT4G14342.1;AT4G14342.2	511
NaN	20.0858	20.3828	20.0935	20.0705	20.0426				-1	9	9	3	19.4	19.4	7.6	61.28	0	55.571	12970000	35	23	AT3G23990.1	AT3G23990.1	514
21.027	20.526	21.1057	20.8606	20.5531	20.8374				-1	7	7	7	16.7	16.7	16.7	61.452	0	53.741	23365000	25	22	AT3G25230.1;AT3G25230.2	AT3G25230.1;AT3G25230.2	516
21.679	21.8235	21.9526	21.8246	21.5453	21.6622				-1	5	5	5	23.3	23.3	23.3	50.08	0	48.757	47743000	23	26	AT3G25860.1	AT3G25860.1	519
20.2618	NaN	NaN	19.4954	19.5948	19.9089				-1	2	2	2	12.2	12.2	12.2	26.923	0	14.97	6079000	9	10	AT3G26420.1	AT3G26420.1	521
25.8771	25.7517	25.8295	26.1747	26.0902	25.8844				-1	39	39	39	49.3	49.3	49.3	56.461	0	323.31	1401500000	24	210	AT3G26990.1;AT3G26990.2;AT5G65180.1	AT3G26990.1;AT3G26990.2	522
22.2547	21.8549	21.9885	21.4818	21.6837	21.5758				-1	14	14	7	63.9	63.9	35.3	30.37	0	130.17	63022000	18	51	AT3G27460.2;AT3G27460.1;AT3G27460.4;AT3G27460.3;AT3G27460.5	AT3G27460.2;AT3G27460.1;AT3G27460.4;AT3G27460.3;AT3G27460.5	525
20.8468	20.3914	20.8027	20.6175	NaN	NaN				-1	4	4	4	17.6	17.6	17.6	19.682	0	37.898	10108000	11	12	AT3G27850.1;AT3G27830.2;AT3G27830.1	AT3G27850.1;AT3G27830.2;AT3G27830.1	527
NaN	NaN	19.8948	NaN	19.5826	19.4526				-1	4	4	4	2.7	2.7	2.7	191.45	0	27.701	4262400	103	8	AT3G43300.2;AT3G43300.3;AT3G43300.1	AT3G43300.2;AT3G43300.3;AT3G43300.1	532
22.1499	21.6702	21.9496	21.718	21.627	21.9377				-1	11	11	6	44.3	44.3	31.5	37.674	0	109.74	76630000	16	51	AT3G44110.2;AT3G44110.1	AT3G44110.2;AT3G44110.1	533
21.3779	21.5801	21.5825	21.6667	21.7449	21.4991				-1	4	2	2	30.6	20.2	20.2	13.878	0	15.91	22767000	6	19	AT5G62300.2;AT5G62300.1;AT3G45030.1	AT5G62300.2;AT5G62300.1;AT3G45030.1	536
21.0219	21.0917	20.9925	21.1647	20.9897	21.0892				-1	5	5	3	29.5	29.5	18.9	13.693	0	33.839	25702000	6	20	AT3G47370.3;AT3G47370.2;AT3G47370.1	AT3G47370.3;AT3G47370.2;AT3G47370.1	542
19.9976	NaN	20.133	19.7522	NaN	19.8234				-1	5	5	5	18.6	18.6	18.6	44.56	0	35.09	7798500	25	13	AT3G47610.1	AT3G47610.1	544
23.3711	23.0603	23.2981	23.4959	23.2273	23.6813				-1	6	6	6	39.1	39.1	39.1	24.614	0	88.969	77796000	12	21	AT3G48330.2;AT3G48330.1;AT3G48330.4;AT3G48330.3	AT3G48330.2;AT3G48330.1;AT3G48330.4;AT3G48330.3	547
21.8229	21.766	22.2163	20.9247	21.516	21.9203				-1	16	16	5	27.1	27.1	10.2	102.24	0	119.48	51588000	46	42	AT3G48870.2;AT3G48870.4;AT3G48870.3;AT3G48870.1;AT2G25140.1	AT3G48870.2;AT3G48870.4;AT3G48870.3;AT3G48870.1	550
20.6896	20.6865	20.6268	20.6454	20.6964	20.6779				-1	9	9	9	42.2	42.2	42.2	23.767	0	61.105	18731000	10	25	AT3G49010.7;AT3G49010.6;AT3G49010.3;AT3G49010.2;AT3G49010.1;AT3G49010.4;AT3G49010.5;AT5G23900.1;AT3G48960.1	AT3G49010.7;AT3G49010.6;AT3G49010.3;AT3G49010.2;AT3G49010.1;AT3G49010.4	552
NaN	NaN	20.9288	20.7983	NaN	20.4293				-1	7	7	7	17.6	17.6	17.6	71.292	0	53.391	9654100	37	14	AT3G49240.1	AT3G49240.1	553
25.5208	25.5321	25.5377	25.8738	25.6398	25.5485				-1	96	96	96	42.7	42.7	42.7	236.76	0	323.31	2149500000	95	569	AT3G50370.2;AT3G50370.1	AT3G50370.2;AT3G50370.1	555
NaN	NaN	NaN	23.2482	23.4311	23.1928				-1	19	19	19	12.2	12.2	12.2	174.99	0	223.63	121050000	79	49	AT3G50590.2;AT3G50590.1	AT3G50590.2;AT3G50590.1	556
21.3857	20.9847	21.2788	21.185	21.2572	21.0093				-1	11	11	11	20.8	20.8	20.8	42.295	0	89.602	34466000	21	35	AT3G51800.3;AT3G51800.1;AT3G51800.2	AT3G51800.3;AT3G51800.1;AT3G51800.2	559
21.6718	21.4591	21.7285	21.8734	21.6029	21.9655				-1	7	7	7	8.4	8.4	8.4	153.26	0	83.555	37686000	62	30	AT3G52140.1;AT3G52140.2;AT3G52140.4;AT3G52140.3	AT3G52140.1;AT3G52140.2;AT3G52140.4;AT3G52140.3	562
21.5623	21.7598	21.4577	21.0083	21.1756	21.188				-1	4	4	4	24.4	24.4	24.4	19.586	0	65.938	24968000	10	17	AT3G52300.1;AT3G52300.2	AT3G52300.1;AT3G52300.2	565
23.5759	23.4633	23.8762	23.5582	23.8855	23.4995				-1	22	10	10	64.2	40.8	40.8	38.539	0	119	140380000	23	55	AT3G52930.1;AT5G03690.2;AT4G26530.3;AT4G26530.2;AT4G26530.1;AT5G03690.1;AT5G03690.4;AT5G03690.3	AT3G52930.1	570
21.5499	20.8928	21.4837	21.2103	21.2084	21.0345				-1	9	9	9	35.9	35.9	35.9	24.684	0	148.27	38228000	16	35	AT3G52960.1	AT3G52960.1	571
23.9384	23.7284	23.621	23.8041	23.4736	23.8525				-1	6	6	6	20.9	20.9	20.9	18.632	0	53.715	161520000	5	32	AT3G53020.1;AT2G36620.1	AT3G53020.1;AT2G36620.1	572
NaN	19.9799	NaN	NaN	19.6871	19.6863				-1	3	3	2	10.8	10.8	8.2	36.007	0	25.348	5878800	20	12	AT3G53460.3;AT3G53460.2;AT3G53460.1;AT3G53460.4	AT3G53460.3;AT3G53460.2;AT3G53460.1;AT3G53460.4	573
21.3794	22.5119	22.2503	22.2858	22.4743	22.2965				-1	10	10	10	28	28	28	63.123	0	156.08	56884000	27	51	AT3G54610.1	AT3G54610.1	581
20.9285	NaN	21.1946	21.2478	21.3512	21.1874				-1	10	10	10	9.6	9.6	9.6	134.97	0	66.537	23838000	52	26	AT3G55220.1;AT3G55200.3;AT3G55200.2;AT3G55200.1	AT3G55220.1;AT3G55200.3;AT3G55200.2;AT3G55200.1	584
20.0663	NaN	20.019	20.0556	19.9114	20.1829				-1	5	5	4	6	6	6	115.16	0	32.029	11020000	48	17	AT3G55410.2;AT3G55410.1	AT3G55410.2;AT3G55410.1	585
22.5544	22.518	23.2932	22.6204	23.0301	22.65				-1	5	5	4	33.1	33.1	29.9	27.169	0	94.85	78925000	14	24	AT3G55440.1	AT3G55440.1	586
20.152	20.1877	NaN	19.8976	20.2068	NaN				-1	3	3	3	13.6	13.6	13.6	18.92	0	18.887	7334400	11	10	AT3G56070.2;AT3G56070.1	AT3G56070.2;AT3G56070.1	589
28.6611	28.5055	28.0286	28.201	28.0161	28.0739				-1	16	16	16	63.7	63.7	63.7	29.576	0	323.31	10424000000	8	321	AT3G56130.1;AT3G56130.4;AT3G56130.2;AT3G56130.5;AT3G56130.3	AT3G56130.1;AT3G56130.4;AT3G56130.2;AT3G56130.5;AT3G56130.3	590
NaN	NaN	20.9684	20.7909	NaN	20.8733				-1	2	2	2	26.1	26.1	26.1	11.943	0	13.65	8451100	6	8	AT3G56240.2;AT3G56240.3;AT3G56240.1	AT3G56240.2;AT3G56240.3;AT3G56240.1	592
21.9539	22.4561	22.2778	22.3439	22.0539	22.1238				-1	13	13	13	28.5	28.5	28.5	63.026	0	170.75	61125000	32	48	AT3G57150.1	AT3G57150.1	594
22.1415	22.3828	22.0106	21.8051	21.5243	21.573				-1	16	6	5	27.6	16.7	14.2	66.025	0	113.63	58790000	30	33	AT3G58510.3;AT3G58510.2;AT3G58510.1	AT3G58510.3;AT3G58510.2;AT3G58510.1	600
21.0691	NaN	21.5212	20.3872	21.0992	20.8598				-1	5	5	5	12.9	12.9	12.9	63.812	0	52.983	17922000	27	16	AT3G58610.3;AT3G58610.2;AT3G58610.1	AT3G58610.3;AT3G58610.2;AT3G58610.1	602
21.7726	NaN	22.31	21.841	21.3154	22.0574				-1	2	2	2	8.7	8.7	8.7	27.208	0	19.184	21931000	18	10	AT3G58990.1	AT3G58990.1	603
24.1352	24.1771	24.157	24.278	24.312	24.1179				-1	72	72	0	43.8	43.8	0	187.72	0	323.31	1200200000	91	375	AT3G60240.3	AT3G60240.3	609
20.8201	20.5029	20.5968	20.3205	20.8054	20.474				-1	7	5	5	10.3	8.8	8.8	79.838	0	32.159	17441000	33	18	AT3G60750.2;AT3G60750.1	AT3G60750.2;AT3G60750.1	612
NaN	NaN	20.5507	20.9188	20.9187	NaN				-1	3	3	3	17.2	17.2	17.2	17.085	0	17.355	7537300	8	9	AT4G00100.1;AT3G60770.1	AT4G00100.1;AT3G60770.1	613
22.0122	21.7143	21.779	21.8655	21.7032	21.9345				-1	7	7	7	23.1	23.1	23.1	39.904	0	56.824	38464000	19	28	AT3G60830.1	AT3G60830.1	614
22.6923	23.0004	22.7341	22.1931	22.1919	22.5057				-1	3	3	2	15.7	15.7	10.6	56.774	0	36.074	35764000	26	13	AT3G61240.2;AT3G61240.1	AT3G61240.2;AT3G61240.1	616
19.6258	20.2585	19.6354	19.8841	19.9421	20.025				-1	3	3	3	8.4	8.4	8.4	60.83	0	23.073	9178100	30	15	AT3G62310.3;AT3G62310.2;AT3G62310.1;AT2G47250.1	AT3G62310.3;AT3G62310.2;AT3G62310.1	620
20.5272	21.1252	21.4021	21.3838	21.3814	21.5983				-1	9	9	9	33.9	33.9	33.9	24.503	0	86.915	47807000	14	42	AT3G62530.1	AT3G62530.1	621
21.1468	21.0692	21.1104	20.9781	20.8807	20.969				-1	6	6	6	7.4	7.4	7.4	118.72	0	50.978	21138000	47	16	AT3G63460.3;AT3G63460.2;AT3G63460.1	AT3G63460.3;AT3G63460.2;AT3G63460.1	623
22.4761	22.2559	22.4092	22.2985	22.4508	22.4779				-1	36	36	36	52.2	52.2	52.2	108.49	0	323.31	196060000	52	142	AT4G01290.2;AT4G01290.1	AT4G01290.2;AT4G01290.1	626
20.972	20.9827	21.1836	20.6118	21.3176	20.987				-1	12	12	12	34.6	34.6	34.6	49.409	0	100.89	37547000	30	38	AT4G02930.1	AT4G02930.1	632
21.4028	21.8552	21.7031	21.7892	21.8168	21.5023				-1	14	14	14	32.1	32.1	32.1	56.823	0	103.02	70412000	25	53	AT4G03250.1	AT4G03250.1	634
20.0985	20.6364	20.7393	19.8433	19.8351	NaN				-1	7	7	7	16.6	16.6	16.6	53.062	0	45.761	12931000	20	19	AT4G05150.1	AT4G05150.1	637
20.3361	NaN	20.3201	NaN	20.3964	20.3182				-1	3	3	3	13.5	13.5	13.5	40.279	0	19.868	10017000	22	12	AT4G08390.3;AT4G08390.5;AT4G08390.2;AT4G08390.1;AT4G08390.4	AT4G08390.3;AT4G08390.5;AT4G08390.2;AT4G08390.1;AT4G08390.4	639
21.597	21.3176	21.6837	21.5046	21.3941	21.5174				-1	9	9	9	26.7	26.7	26.7	51.171	0	88.303	34253000	15	31	AT4G08580.1;AT4G08580.2;AT5G17900.1	AT4G08580.1;AT4G08580.2;AT5G17900.1	640
NaN	21.1495	21.4741	21.3654	21.6502	21.3375				-1	7	3	2	27.7	15	10.9	29.931	0	24.752	21624000	18	13	AT4G09000.1;AT4G09000.2	AT4G09000.1;AT4G09000.2	641
19.9431	19.7348	20.1862	20.5544	19.7565	19.887				-1	7	7	7	9.1	9.1	9.1	114.3	0	44.151	13411000	51	23	AT4G11420.1	AT4G11420.1	645
21.1205	NaN	21.036	21.0849	20.6901	20.7047				-1	2	2	2	11.2	11.2	11.2	25.584	0	16.459	14375000	12	11	AT4G11600.1	AT4G11600.1	646
23.0485	22.9573	23.0434	23.2476	22.9955	23.3865				-1	5	5	5	51.4	51.4	51.4	14.691	0	129.42	76955000	6	22	AT4G13850.3;AT4G13850.2;AT4G13850.1;AT4G13850.4	AT4G13850.3;AT4G13850.2;AT4G13850.1;AT4G13850.4	647
NaN	19.9156	NaN	20.015	20.3067	NaN				-1	3	3	3	11.4	11.4	11.4	35.531	0	24.016	5850500	21	7	AT4G13940.4;AT4G13940.2;AT4G13940.3;AT4G13940.1;AT3G23810.1	AT4G13940.4;AT4G13940.2;AT4G13940.3;AT4G13940.1;AT3G23810.1	649
21.3476	21.5812	21.3628	21.394	21.4253	21.4561				-1	7	7	3	15	15	9.9	58.906	0	48.709	21660000	25	20	AT4G16143.1;AT4G16143.2;AT4G02150.2	AT4G16143.1;AT4G16143.2	656
21.6816	NaN	21.9232	21.7984	21.4327	21.6731				-1	3	3	3	8.5	8.5	8.5	73.583	0	32.951	24437000	31	10	AT4G16280.4;AT4G16280.2;AT4G16280.3;AT4G16280.1	AT4G16280.4;AT4G16280.2;AT4G16280.3	657
21.7825	21.6233	21.8581	21.6625	22.0544	21.5777				-1	10	10	10	28.8	28.8	28.8	55.723	0	84.572	50180000	23	40	AT4G16420.2;AT4G16420.3;AT4G16420.1	AT4G16420.2;AT4G16420.3;AT4G16420.1	658
20.2597	NaN	NaN	NaN	20.3205	20.0523				-1	11	11	11	10.9	10.9	10.9	214.2	0	70.603	11328000	88	20	AT4G17330.3;AT4G17330.2;AT4G17330.1	AT4G17330.3;AT4G17330.2;AT4G17330.1	661
NaN	NaN	20.3469	19.7047	NaN	19.8161				-1	5	4	4	22.8	18.9	18.9	38.905	0	27.836	5970400	18	10	AT4G17520.1	AT4G17520.1	663
24.4668	24.1986	24.087	24.4621	24.5255	24.6251				-1	7	7	7	48.5	48.5	48.5	26.519	0	79.847	188940000	13	38	AT4G18040.1	AT4G18040.1	666
25.6709	24.7227	25.1033	NaN	24.6131	NaN				-1	1	1	1	3.2	3.2	3.2	31.971	0.0053362	6.1277	126850000	12	10	AT4G18090.1	AT4G18090.1	667
21.4814	21.3278	21.3111	21.451	21.5506	21.4611				-1	13	13	13	19.5	19.5	19.5	68.389	0	136.85	77687000	29	66	AT4G19210.1	AT4G19210.1	671
23.7065	23.0343	23.549	23.4185	23.3711	23.3243				-1	13	13	13	28.2	28.2	28.2	51.63	0	121.41	100730000	25	49	AT4G20360.2;AT4G20360.1	AT4G20360.2;AT4G20360.1	673
21.1127	NaN	20.7073	21.1552	20.9987	20.5152				-1	9	9	9	24.8	24.8	24.8	66.833	0	80.996	24041000	19	29	AT4G21660.1;AT4G21660.2;AT4G21660.3	AT4G21660.1;AT4G21660.2;AT4G21660.3	676
21.3836	NaN	21.3565	20.7593	NaN	21.2464				-1	2	2	2	7.7	7.7	7.7	46.621	0	44.127	11686000	18	10	AT4G22670.1	AT4G22670.1	679
23.138	22.7738	23.1099	22.8183	23.2437	23.0068				-1	58	19	19	53.9	20.6	20.6	76.507	0	186.1	150290000	38	70	AT4G24280.1	AT4G24280.1	683
NaN	NaN	NaN	20.5235	20.5289	20.6373				-1	4	4	4	8.3	8.3	8.3	77.435	0	33.341	8647400	33	9	AT4G24800.4;AT4G24800.3;AT4G24800.2;AT4G24800.1	AT4G24800.4;AT4G24800.3;AT4G24800.2;AT4G24800.1	685
22.2768	22.2	22.4268	22.4277	22.5657	22.1074				-1	3	3	3	8.7	8.7	8.7	33.071	0	26.087	33910000	17	14	AT4G25840.1	AT4G25840.1	694
20.2137	NaN	19.9857	19.5092	20.5007	20.4058				-1	3	3	3	17	17	17	41.607	0	25.533	8800200	16	12	AT4G26110.2;AT4G26110.1	AT4G26110.2;AT4G26110.1	696
22.7695	22.6989	22.8146	22.8666	22.864	22.5849				-1	15	14	14	50.5	47.1	47.1	36.116	0	164.32	130350000	21	64	AT4G26780.1	AT4G26780.1	698
22.0022	21.993	21.9672	NaN	22.1117	22.1785				-1	2	2	2	14	14	14	27.622	0	36.076	22723000	13	11	AT4G27450.1	AT4G27450.1	702
20.4574	NaN	NaN	20.4727	20.3134	20.252				-1	4	4	4	17.3	17.3	17.3	45.02	0	26.543	7693000	25	10	AT4G27585.1	AT4G27585.1	703
NaN	20.713	NaN	20.5654	20.7388	20.6244				-1	3	3	3	29.4	29.4	29.4	16.459	0	38.377	12788000	9	10	AT4G28440.1	AT4G28440.1	704
22.3745	22.0099	21.6672	21.7324	22.4429	21.872				-1	4	3	3	35	35	35	15.91	0	42.08	43218000	7	20	AT4G29410.2;AT4G29410.1	AT4G29410.2;AT4G29410.1	707
26.992	27.1753	27.1138	27.1516	27.2042	27.1738				-1	40	40	40	48.2	48.2	48.2	72.496	0	323.31	1945300000	20	278	AT4G31200.3;AT4G31200.2;AT4G31200.1	AT4G31200.3;AT4G31200.2;AT4G31200.1	711
NaN	20.4019	20.4931	20.5118	20.3526	20.0902				-1	4	4	4	14.5	14.5	14.5	41.801	0	39.613	11815000	23	19	AT4G31440.1	AT4G31440.1	712
NaN	21.5393	21.2511	21.4546	NaN	21.288				-1	1	1	1	1.9	1.9	1.9	106.08	0	10.625	13054000	42	11	AT4G31490.3;AT4G31490.2;AT4G31490.1;AT4G31480.9;AT4G31480.8;AT4G31480.7;AT4G31480.5;AT4G31480.4;AT4G31480.2;AT4G31480.1;AT4G31480.6;AT4G31480.3	AT4G31490.3;AT4G31490.2;AT4G31490.1;AT4G31480.9;AT4G31480.8;AT4G31480.7;AT4G31480.5;AT4G31480.4;AT4G31480.2;AT4G31480.1;AT4G31480.6;AT4G31480.3	713
NaN	NaN	NaN	22.9309	22.5495	22.6601				-1	8	3	3	26	16.4	16.4	28.367	0	27.092	24537000	10	10	AT4G31700.1;AT4G31700.2	AT4G31700.1;AT4G31700.2	714
22.0402	21.5916	21.8295	21.9331	21.9001	21.8137				-1	6	6	6	44	44	44	14.913	0	50.363	40771000	7	25	AT4G31720.3;AT4G31720.2;AT4G31720.1	AT4G31720.3;AT4G31720.2;AT4G31720.1	715
20.7098	NaN	20.1965	20.7794	20.4538	20.6672				-1	11	11	11	19.9	19.9	19.9	102.23	0	92.336	19050000	36	27	AT4G32551.1;AT4G32551.2	AT4G32551.1;AT4G32551.2	718
21.142	20.7042	NaN	21.2876	21.1379	20.664				-1	7	7	3	18.4	18.4	9.3	50.787	0	67.722	19055000	24	19	AT4G32840.1	AT4G32840.1	720
22.0007	23.5231	23.9326	23.8433	23.9278	24.0272				-1	18	18	18	26.4	26.4	26.4	64.012	0	323.31	201040000	29	88	AT4G34030.1	AT4G34030.1	723
21.6999	21.8376	21.8835	21.798	21.8194	21.7102				-1	12	10	10	28.6	23.4	23.4	68.672	0	98.69	50081000	29	49	AT4G34110.1	AT4G34110.1	724
21.3289	20.9804	21.009	20.7735	20.9003	21.0352				-1	7	7	7	16.7	16.7	16.7	63.324	0	44.299	16178000	29	22	AT4G34200.1;AT3G19480.1	AT4G34200.1	725
NaN	21.1777	20.7599	21.1573	21.5301	21.3689				-1	4	4	4	38.2	38.2	38.2	15.998	0	30.189	19375000	9	16	AT4G34290.1;AT2G14880.1	AT4G34290.1;AT2G14880.1	727
21.5176	NaN	21.1528	20.8808	21.3702	20.619				-1	6	4	4	36	30.8	30.8	18.378	0	55.21	17806000	10	15	AT4G34870.1	AT4G34870.1	733
22.0334	NaN	20.4358	NaN	20.9753	21.0978				-1	5	5	4	16.1	16.1	11.7	39.626	0	45.73	23634000	15	21	AT4G35260.1;AT4G35650.1	AT4G35260.1	734
20.411	NaN	NaN	20.1099	20.1338	20.1015				-1	2	2	2	12.8	12.8	12.8	26.68	0	16.49	7847100	14	10	AT4G36020.2;AT4G36020.3;AT4G36020.1	AT4G36020.2;AT4G36020.3;AT4G36020.1	737
NaN	21.1416	20.9001	20.2022	20.9788	20.8472				-1	5	5	5	11.2	11.2	11.2	73.404	0	50.021	18430000	34	17	AT4G37870.1	AT4G37870.1	740
24.7755	24.57	24.6412	24.6168	24.5748	24.5499				-1	45	44	35	63.9	62.9	59.2	73.074	0	323.31	923910000	40	225	AT4G37910.2;AT4G37910.1	AT4G37910.2;AT4G37910.1	741
20.923	21.0062	20.8621	20.4412	20.9273	21.1144				-1	2	2	2	9.8	9.8	9.8	40.757	0	31.839	11730000	14	11	AT4G38630.1	AT4G38630.1	743
23.0409	23.2103	22.7202	23.1076	22.635	22.85				-1	4	4	4	26.6	26.6	26.6	19.153	0	68.147	45884000	10	17	AT4G38680.1	AT4G38680.1	744
22.0426	21.7687	21.5871	22.5103	22.658	21.9748				-1	7	3	3	13	7.6	7.6	48.031	0	26.911	46251000	24	11	AT4G39960.2;AT4G39960.1	AT4G39960.2;AT4G39960.1	747
NaN	23.6748	22.8595	22.7965	22.6516	22.8993				-1	5	5	5	25	25	25	15.406	0	31.572	54761000	4	14	AT4G40030.1;AT4G40040.2;AT5G10980.1;AT4G40040.3;AT4G40030.2;AT4G40040.1;AT4G40030.4;AT4G40030.3;AT1G09200.1;AT5G10390.1;AT5G10400.1;AT5G65360.1;AT3G27360.1;AT1G75600.1;AT1G13370.1;AT5G65350.1;AT1G19890.1	AT4G40030.1;AT4G40040.2;AT5G10980.1;AT4G40040.3;AT4G40030.2;AT4G40040.1;AT4G40030.4;AT4G40030.3;AT1G09200.1;AT5G10390.1;AT5G10400.1;AT5G65360.1;AT3G27360.1;AT1G75600.1;AT1G13370.1;AT5G65350.1	748
23.4892	23.0574	23.8504	24.1624	23.7792	23.8708				-1	12	12	12	30.7	30.7	30.7	38.272	0	133.15	195200000	13	60	AT5G01380.1	AT5G01380.1	749
19.8516	NaN	NaN	19.7514	19.6529	19.9841				-1	3	3	1	32.4	32.4	10.2	12.189	0	23.57	7332900	4	10	AT5G02450.1	AT5G02450.1	750
NaN	21.3724	21.2179	21.6434	21.41	21.556				-1	35	9	7	47.8	15.2	13.2	71.386	0	65.555	22080000	36	23	AT5G02490.1;AT1G56410.1	AT5G02490.1;AT1G56410.1	751
25.225	24.892	25.0996	25.1688	25.37	25.1927				-1	46	46	9	59.3	59.3	22.7	71.357	0	323.31	1816500000	37	318	AT5G02500.1;AT5G02500.2	AT5G02500.1;AT5G02500.2	752
20.3654	20.3153	20.7223	20.8471	21.1663	20.9843				-1	6	4	4	19.7	13.3	13.3	44.721	0	47.291	18070000	19	20	AT5G02870.1;AT5G02870.2	AT5G02870.1;AT5G02870.2	754
21.4443	NaN	21.0936	20.9725	21.4006	NaN				-1	5	5	5	23.7	23.7	23.7	34.728	0	43.015	16888000	16	16	AT5G05780.1;AT5G05780.2;AT3G11270.1;AT3G11270.2	AT5G05780.1;AT5G05780.2;AT3G11270.1	760
21.012	NaN	NaN	21.1324	21.1436	NaN				-1	6	6	6	20	20	20	58.971	0	37.472	12924000	28	14	AT5G06160.1	AT5G06160.1	761
23.1901	22.6867	23.2425	23.2099	23.2846	23.0657				-1	11	11	11	16	16	16	110.05	0	83.83	60873000	55	35	AT5G07350.2;AT5G07350.1;AT5G61780.1	AT5G07350.2;AT5G07350.1	763
20.9436	20.8608	21.0519	20.775	21.0256	20.8137				-1	6	6	3	31.4	31.4	15.3	36.151	0	49.358	17960000	16	17	AT5G08300.1;AT5G23250.2;AT5G23250.3	AT5G08300.1	764
21.7377	21.4202	21.4944	21.5298	21.7198	21.4328				-1	15	15	15	23.2	23.2	23.2	104.15	0	131.03	59254000	46	51	AT5G08450.3;AT5G08450.2;AT5G08450.1	AT5G08450.3;AT5G08450.2;AT5G08450.1	765
22.7994	22.6606	22.6846	21.973	22.5599	22.4514				-1	15	15	14	38.7	38.7	36.7	59.712	0	175.85	110410000	30	53	AT5G08690.1;AT5G08670.1;AT5G08680.1	AT5G08690.1;AT5G08670.1;AT5G08680.1	767
24.7292	24.5122	24.8008	24.6532	24.7679	24.6794				-1	45	35	35	62	60.6	60.6	72.99	0	323.31	717960000	38	167	AT5G09590.1;AT4G32208.1	AT5G09590.1	768
20.8214	21.1218	20.7794	20.9654	20.7167	20.4462				-1	6	6	5	23.3	23.3	19.9	55.03	0	46.262	17741000	18	18	AT5G09620.2;AT5G09620.1	AT5G09620.2;AT5G09620.1	769
NaN	19.2519	NaN	19.9084	20.3699	NaN				-1	4	4	4	25.7	25.7	25.7	33.38	0	33.06	6669800	14	9	AT5G09650.1	AT5G09650.1	770
24.7863	24.6046	24.7168	24.7116	24.6044	24.5621				-1	20	20	3	65	65	13.5	41.735	0	238.72	455110000	21	102	AT5G09810.1	AT5G09810.1	771
NaN	NaN	22.3137	22.094	22.1024	22.3489				-1	6	6	6	16.7	16.7	16.7	50.85	0	53.277	24125000	26	18	AT5G09900.2;AT5G09900.1;AT5G09900.3;AT5G64760.3;AT5G64760.2;AT5G64760.1	AT5G09900.2;AT5G09900.1;AT5G09900.3	772
21.9416	21.7269	21.9667	22.384	22.0366	22.1535				-1	9	9	4	27.3	27.3	17.7	28.162	0	65.192	38928000	10	25	AT5G10360.1;AT5G10360.2	AT5G10360.1;AT5G10360.2	776
21.7963	20.4332	21.3354	21.323	21.6233	21.7066				-1	5	4	4	23.6	20.3	20.3	27.718	0	33.839	29523000	16	21	AT5G10450.2;AT5G10450.1;AT5G10450.3;AT5G10450.4	AT5G10450.2;AT5G10450.1;AT5G10450.3;AT5G10450.4	777
22.7733	22.1538	22.6599	21.9305	22.3354	22.4178				-1	5	5	5	24.3	24.3	24.3	22.729	0	55.606	31679000	14	16	AT5G10860.1	AT5G10860.1	779
NaN	NaN	NaN	19.7546	19.7148	19.4753				-1	4	4	4	6.5	6.5	6.5	116.96	0	61.728	4913200	49	8	AT5G11110.1	AT5G11110.1	780
22.4181	22.2414	22.5852	22.1117	22.4026	22.2012				-1	9	7	7	54.4	50	50	24.788	0	82.752	43862000	9	25	AT5G12110.1	AT5G12110.1	783
20.7875	20.475	20.8396	20.9429	21.074	20.8933				-1	5	5	4	72.3	72.3	64.4	11.255	0	42.838	24007000	6	21	AT5G12140.1	AT5G12140.1	784
20.2886	20.6259	20.5571	20.3327	20.6759	20.1252				-1	5	5	5	10.2	10.2	10.2	67.991	0	50.869	14576000	36	16	AT5G12220.2;AT5G12220.1	AT5G12220.2;AT5G12220.1	786
NaN	21.9476	NaN	21.36	NaN	21.9155				-1	2	2	2	25.4	25.4	25.4	7.8194	0	29.184	19273000	6	11	AT5G12240.1;AT5G12240.2	AT5G12240.1;AT5G12240.2	787
21.2677	20.8207	21.3841	20.5033	21.0432	20.6623				-1	9	9	9	23.3	23.3	23.3	47.698	0	95.226	20739000	28	21	AT5G13420.1	AT5G13420.1	794
21.4128	21.136	21.0029	21.0776	20.6478	20.8048				-1	8	8	5	23.4	23.4	17.1	41.745	0	61.653	43723000	19	34	AT5G13490.2;AT5G13490.1;AT4G28390.2;AT4G28390.1	AT5G13490.2;AT5G13490.1	795
21.6001	21.4711	21.563	20.8479	20.9338	21.1116				-1	7	7	5	33.9	33.9	29.2	29.21	0	82.499	30611000	13	29	AT5G15090.2;AT5G15090.1	AT5G15090.2;AT5G15090.1	806
NaN	NaN	21.0537	21.0407	21.3869	21.3153				-1	5	5	1	37.1	37.1	7.7	15.817	0	37.267	19131000	9	13	AT5G15520.1;AT5G61170.1	AT5G15520.1;AT5G61170.1	808
25.1457	25.2016	25.0967	25.0336	25.0978	25.0878				-1	10	9	9	40.8	37.3	37.3	27.279	0	206.39	386210000	14	74	AT5G15530.1	AT5G15530.1	809
19.9439	NaN	19.8949	NaN	19.7764	20.0411				-1	2	2	2	6	6	6	75.298	0	18.635	6386600	40	10	AT5G15980.1	AT5G15980.1	811
20.343	20.1291	19.9574	20.2651	20.3715	20.4782				-1	6	6	6	27.9	27.9	27.9	22.06	0	48.309	13289000	8	18	AT5G16130.1;AT3G02560.3;AT3G02560.2;AT3G02560.1	AT5G16130.1	813
24.0225	24.025	23.8413	23.8436	23.7973	23.6394				-1	15	15	15	36.1	36.1	36.1	52.31	0	261.88	294130000	19	73	AT5G16220.1	AT5G16220.1	814
30.8187	31.038	30.4967	30.6802	30.4886	30.6288				-1	19	19	18	41.7	41.7	41.7	26.927	0	323.31	14441000000	11	228	AT5G16390.2;AT5G16390.1	AT5G16390.2;AT5G16390.1	816
20.6966	NaN	20.0721	19.8102	20.2328	20.0114				-1	4	4	4	17.4	17.4	17.4	28.514	0	26.344	9645400	18	13	AT5G16710.1	AT5G16710.1	817
NaN	NaN	19.773	19.7875	19.4978	NaN				-1	4	4	4	9.8	9.8	9.8	70.992	0	28.13	6658900	39	10	AT5G16930.1	AT5G16930.1	820
22.1886	23.5757	22.4523	23.2443	NaN	NaN				-1	4	4	4	18.8	18.8	18.8	38.133	0	42.39	34149000	18	14	AT5G16970.1;AT5G16990.1	AT5G16970.1	821
20.5263	NaN	20.7116	20.5581	20.8581	20.6042				-1	4	4	4	11	11	11	57.066	0	29.443	11466000	24	14	AT5G17330.1	AT5G17330.1	823
20.6088	20.4899	20.8663	20.6809	20.735	20.8451				-1	9	9	9	33.1	33.1	33.1	42.554	0	75.06	31501000	19	37	AT5G17510.2;AT5G17510.1	AT5G17510.2;AT5G17510.1	826
24.3156	24.0062	24.0651	23.9842	24.1368	24.1189				-1	14	14	14	46.6	46.6	46.6	35.493	0	178.03	232820000	17	68	AT5G17710.3;AT5G17710.1;AT5G17710.2	AT5G17710.3;AT5G17710.1;AT5G17710.2	827
19.6939	20.9895	21.8169	20.4347	20.531	20.7604				-1	8	8	8	12.7	12.7	12.7	84.356	0	57.244	22700000	38	26	AT5G17920.2;AT5G17920.1;AT3G03780.3;AT3G03780.2;AT3G03780.1;AT5G20980.2;AT5G20980.1	AT5G17920.2;AT5G17920.1;AT3G03780.3;AT3G03780.2;AT3G03780.1	829
20.3317	20.0599	20.7107	20.744	20.4829	20.5838				-1	8	8	8	15	15	15	89.982	0	56.141	17532000	33	22	AT5G18230.3;AT5G18230.1;AT5G18230.2;AT5G18230.4	AT5G18230.3;AT5G18230.1;AT5G18230.2;AT5G18230.4	832
21.3874	21.6283	21.6236	21.5974	21.2319	21.0918				-1	10	10	10	20.6	20.6	20.6	53.645	0	89.823	44242000	14	32	AT5G18440.2;AT5G18440.1	AT5G18440.2;AT5G18440.1	833
22.5898	22.4864	22.4814	22.4067	22.4855	22.402				-1	11	11	9	50.4	50.4	39.7	24.201	0	144.78	120520000	10	58	AT5G19510.1	AT5G19510.1	837
20.6482	20.595	20.8268	20.4867	20.7589	20.6251				-1	8	8	8	18.8	18.8	18.8	44.266	0	56.752	27293000	27	36	AT5G19550.1	AT5G19550.1	838
21.8562	21.8275	22.0788	21.9721	21.741	21.8511				-1	7	7	7	26.7	26.7	26.7	25.079	0	54.589	34657000	11	22	AT5G55190.1;AT5G20020.1;AT5G20010.1	AT5G55190.1;AT5G20020.1;AT5G20010.1	841
21.6646	22.2023	21.9369	21.3255	21.5573	21.4214				-1	8	8	8	11.9	11.9	11.9	117.32	0	72.745	27471000	46	23	AT5G20280.1;AT1G04920.1	AT5G20280.1	845
23.1992	23.1875	23.1747	23.3361	23.1736	23.0551				-1	11	11	11	54.5	54.5	54.5	24.993	0	125.2	107050000	9	45	AT5G20290.1;AT5G59240.1	AT5G20290.1	846
24.3684	24.2102	24.4216	23.8984	24.0918	23.9513				-1	15	15	15	56.9	56.9	56.9	26.802	0	196.19	279350000	15	70	AT5G20720.4;AT5G20720.3;AT5G20720.2;AT5G20720.1	AT5G20720.4;AT5G20720.3;AT5G20720.2;AT5G20720.1	848
22.2919	22.3231	22.8698	22.8034	22.6113	22.5839				-1	10	10	10	22.6	22.6	22.6	57.285	0	100.03	60748000	31	43	AT5G20890.1	AT5G20890.1	849
20.6426	21.0099	20.6718	20.6107	20.5142	20.618				-1	5	5	5	22	22	22	30.663	0	53.55	15662000	12	21	AT5G20920.1;AT5G20920.3;AT5G20920.2	AT5G20920.1;AT5G20920.3;AT5G20920.2	850
22.6637	22.6972	22.77	23.0743	22.728	22.7085				-1	10	10	10	17.2	17.2	17.2	91.376	0	112.41	80934000	38	40	AT5G21160.1;AT5G21160.2;AT5G21160.3	AT5G21160.1;AT5G21160.2;AT5G21160.3	852
20.5092	20.0481	20.3017	19.8703	19.9159	19.9851				-1	6	6	6	15.9	15.9	15.9	50.323	0	42.894	12723000	23	18	AT5G22330.1	AT5G22330.1	855
21.1189	21.2394	21.0799	20.9685	20.8992	20.915				-1	20	20	20	22.6	22.6	22.6	126.08	0	153.5	48904000	59	62	AT5G22450.3;AT5G22450.2;AT5G22450.1	AT5G22450.3;AT5G22450.2;AT5G22450.1	856
20.8419	20.5825	20.7348	20.8266	20.7211	20.7893				-1	3	3	3	15.1	15.1	15.1	29.207	0	28.395	14869000	13	16	AT5G23540.2;AT5G23540.1	AT5G23540.2;AT5G23540.1	861
18.3054	18.3511	18.2454	24.3964	23.7405	23.6059				-1	36	36	36	27.9	27.9	27.9	148.07	0	323.31	288910000	64	109	AT5G24710.1	AT5G24710.1	863
27.2101	27.0056	27.0413	26.9943	27.1424	27.0013				-1	78	78	78	58	58	58	108.28	0	323.31	6372200000	52	582	AT5G25060.1;AT5G10800.3;AT5G10800.1;AT5G10800.2	AT5G25060.1	865
23.2204	23.5301	23.3299	23.264	23.4096	23.3851				-1	11	11	11	21.5	21.5	21.5	74.413	0	127.59	134830000	26	50	AT5G25150.1;AT5G25150.2	AT5G25150.1;AT5G25150.2	866
21.4168	21.0951	21.0115	21.013	21.0098	20.9065				-1	10	10	10	12.4	12.4	12.4	109.16	0	69.718	29640000	53	30	AT5G26860.1;AT3G05780.1	AT5G26860.1	877
20.9557	21.1893	21.2828	21.4701	21.4756	21.4075				-1	3	3	1	39	39	19.5	9.1131	0	38.678	22434000	2	14	AT5G27700.1	AT5G27700.1	880
21.9573	21.1022	21.6197	22.7097	22.0756	21.7211				-1	6	6	3	49.2	49.2	21.8	14.047	0	46.122	48253000	6	22	AT5G27770.1	AT5G27770.1	883
22.8015	22.7586	22.7008	22.7595	22.5918	22.6477				-1	34	31	2	40.2	36	4.2	73.628	0	287.71	261720000	31	138	AT5G28540.1;AT1G09080.2;AT1G09080.1	AT5G28540.1	885
30.3145	30.1208	30.2103	30.2009	30.3907	30.3652				-1	61	61	61	69.5	69.5	69.5	58.386	0	323.31	42208000000	31	675	AT5G35360.1;AT5G35360.3;AT5G35360.2	AT5G35360.1;AT5G35360.3;AT5G35360.2	886
23.7666	23.4713	23.8347	23.8619	23.9958	23.8662				-1	8	8	3	26.8	26.8	12.2	28.491	0	74.126	126330000	15	42	AT5G38480.3;AT5G38480.2;AT5G38480.1;AT1G78300.1	AT5G38480.3;AT5G38480.2;AT5G38480.1	892
20.8307	20.7256	21.0289	20.6428	20.7743	20.5392				-1	4	4	4	59.5	59.5	59.5	11.756	0	30.273	20080000	6	17	AT5G40370.1;AT5G40370.2	AT5G40370.1;AT5G40370.2	894
22.4299	22.4243	22.7522	22.4348	21.9477	22.1989				-1	10	10	10	28.4	28.4	28.4	42.407	0	104.24	70832000	20	47	AT5G40490.1;AT5G40490.2	AT5G40490.1;AT5G40490.2	895
NaN	NaN	20.807	NaN	21.0337	21.089				-1	13	6	6	54.9	26.7	26.7	30.885	0	39.098	10200000	19	13	AT5G40550.1;AT5G40550.2;AT5G40550.3;AT5G40550.4	AT5G40550.1;AT5G40550.2;AT5G40550.3;AT5G40550.4	896
21.5036	21.7406	21.6739	21.7767	21.7654	21.3622				-1	6	6	6	26.7	26.7	26.7	19.733	0	48.578	32981000	10	25	AT5G41520.1;AT5G41520.2	AT5G41520.1;AT5G41520.2	899
NaN	NaN	20.2356	20.1816	20.1828	NaN				-1	3	3	3	9.5	9.5	9.5	35.549	0	17.679	6458300	21	10	AT5G42150.1	AT5G42150.1	902
19.2969	NaN	NaN	19.3401	19.2486	NaN				-1	8	8	4	27.3	27.3	13.9	52.125	0	55.91	7557100	30	15	AT5G43780.1	AT5G43780.1	910
25.5704	25.4548	25.4026	25.383	25.3843	25.3558				-1	10	10	10	32.7	32.7	32.7	43.484	0	161.58	563390000	20	66	AT5G43960.2;AT5G43960.1	AT5G43960.2;AT5G43960.1	911
22.2762	22.5861	22.3741	22.1653	22.4519	22.5452				-1	18	6	3	42.3	18.5	7.2	49.823	0	74.096	77457000	20	31	AT5G44340.1;AT1G20010.1;CON__ENSEMBL:ENSBTAP00000025008	AT5G44340.1	913
NaN	19.9027	20.286	20.0262	20.4372	NaN				-1	2	2	2	18.7	18.7	18.7	21.547	0	13.704	8674500	10	6	AT5G47030.1	AT5G47030.1	918
21.3065	21.1785	21.2082	21.1815	21.1154	21.1147				-1	9	9	8	27.2	27.2	23.2	37.999	0	85.993	49862000	20	47	AT5G47210.1;AT5G47210.3;AT5G47210.2;AT4G16830.2;AT4G16830.3;AT4G16830.1	AT5G47210.1;AT5G47210.3	919
20.6374	NaN	20.3222	NaN	20.5514	19.9545				-1	3	3	3	10.5	10.5	10.5	49.437	0	22.62	9102800	24	13	AT5G48030.1	AT5G48030.1	921
21.0846	21.0477	21.506	20.9677	20.9168	20.9303				-1	4	4	4	21.7	21.7	21.7	17.557	0	33.645	18257000	10	18	AT5G48480.1	AT5G48480.1	922
25.9998	25.9785	25.8844	26.0416	26.0145	25.8931				-1	64	64	25	55.4	55.4	23.3	76.996	0	323.31	2250600000	36	342	AT5G49910.1	AT5G49910.1	924
20.0391	NaN	20.0773	19.5116	19.9841	NaN				-1	2	2	2	8.3	8.3	8.3	39.175	0	24.812	6035200	16	9	AT5G50850.1	AT5G50850.1	927
21.2235	NaN	21.2082	20.4919	NaN	21.0663				-1	3	3	3	13.6	13.6	13.6	44.594	0	44.382	13382000	13	11	AT5G51590.1	AT5G51590.1	930
NaN	22.3984	22.9331	NaN	22.8553	NaN				-1	1	1	1	6.2	6.2	6.2	20.613	0.0054705	6.3086	24381000	11	9	AT5G52690.1	AT5G52690.1	934
20.8893	21.1081	20.9253	20.7173	20.6629	20.823				-1	10	10	10	53.3	53.3	53.3	19.179	0	67.648	25169000	11	30	AT5G52840.1;AT5G52840.2	AT5G52840.1;AT5G52840.2	935
21.2793	21.6323	21.5672	21.3906	21.5578	21.3349				-1	7	7	7	64.1	64.1	64.1	17.09	0	58.845	23185000	11	20	AT5G54580.1	AT5G54580.1	942
NaN	NaN	20.6227	21.161	20.6914	20.7764				-1	4	4	4	49.6	49.6	49.6	12.62	0	24.937	12022000	4	12	AT5G54760.4;AT5G54760.3;AT5G54760.2;AT5G54760.1;AT4G27130.1;AT1G54290.1;AT5G54940.3;AT5G54940.2;AT5G54940.1	AT5G54760.4;AT5G54760.3;AT5G54760.2;AT5G54760.1;AT4G27130.1;AT1G54290.1;AT5G54940.3;AT5G54940.2;AT5G54940.1	943
22.967	22.8215	22.9534	22.4323	22.6646	22.741				-1	15	15	14	49.7	49.7	46	33.202	0	231.31	130300000	19	80	AT5G55200.1	AT5G55200.1	946
20.0212	NaN	NaN	20.1051	19.9066	20.1791				-1	2	2	2	20.8	20.8	20.8	18.527	0	15.801	6795400	9	7	AT5G55210.1	AT5G55210.1	947
23.5369	23.0365	23.5005	23.1317	23.4773	23.3269				-1	25	25	2	34.3	34.3	4.7	80.063	0	259.46	290210000	34	123	AT5G56030.1;AT5G56030.2	AT5G56030.1;AT5G56030.2	949
NaN	NaN	NaN	22.246	22.5576	22.1761				-1	11	11	11	17.6	17.6	17.6	70.511	0	142.11	60285000	32	27	AT5G57460.1	AT5G57460.1	954
21.0958	20.9762	20.9459	20.7278	20.8597	20.7791				-1	8	7	7	31.9	31.9	31.9	45.751	0	67.368	20456000	23	23	AT5G58290.1	AT5G58290.1	956
NaN	21.4116	21.6521	21.5383	21.2661	21.6205				-1	2	2	2	8	8	8	28.518	0	16.048	19279000	14	11	AT5G60230.1;AT5G60230.2	AT5G60230.1;AT5G60230.2	959
21.1052	21.1592	21.2245	21.6551	21.3506	21.5973				-1	10	10	10	25.7	25.7	25.7	49.415	0	103.98	44337000	26	37	AT5G60980.4;AT5G60980.1;AT5G60980.3;AT5G60980.2	AT5G60980.4;AT5G60980.1;AT5G60980.3;AT5G60980.2	961
20.5578	21.4259	21.6233	21.2978	20.8307	20.9001				-1	6	6	6	26.9	26.9	26.9	29.984	0	74.374	21948000	6	19	AT5G61030.2;AT5G61030.1	AT5G61030.2;AT5G61030.1	963
20.9017	NaN	20.6575	21.2851	21.1346	NaN				-1	5	5	5	9.7	9.7	9.7	141.45	0	67.348	20339000	61	18	AT5G64270.1	AT5G64270.1	972
23.716	23.6724	23.6427	23.8002	23.6625	23.6199				-1	24	24	24	46.9	46.9	46.9	68.736	0	323.31	300940000	35	122	AT5G65540.1	AT5G65540.1	975
NaN	NaN	21.0056	20.3788	20.3605	NaN				-1	3	3	3	10.8	10.8	10.8	50.295	0	27.398	8313800	27	10	AT5G65720.1;AT5G65720.3;AT5G65720.2	AT5G65720.1;AT5G65720.3	976
20.2364	NaN	20.1942	19.9838	NaN	NaN				-1	4	4	4	10.9	10.9	10.9	52.113	0	29.368	8180300	27	11	AT5G67630.1;AT3G49830.1	AT5G67630.1	979
NaN	NaN	NaN	23.6604	23.5265	23.2845				-1	1	1	1	16.7	16.7	16.7	7.8251	0.0013038	9.6332	33958000	1	10	FLAGPUP|SUB|SUB_LABEL	FLAGPUP|SUB|SUB_LABEL	1001
21.1825	NaN	NaN	25.1336	23.9497	23.7964				-1	26	26	26	50.8	50.8	50.8	53.8	0	250.37	189290000	26	75	PafA|BAIT|BAIT_LABEL	PafA|BAIT|BAIT_LABEL	1002

## Sheet: only detected in biotin ind (b)
Proteins only detected in samples from biotin treatment, proteins were eluted by biotin.
biotin_mock_rep1	biotin_mock_rep2	biotin_mock_rep3	biotin_ind_rep1	biotin_ind_rep2	biotin_ind_rep3	Count
			+	+	+	14
Protein IDs	Majority protein IDs	id
AT1G31760.1	AT1G31760.1	103
AT1G51580.1	AT1G51580.1	144
AT4G02080.1;AT3G62560.1;AT1G56330.1;AT1G09180.1	AT4G02080.1;AT3G62560.1;AT1G56330.1;AT1G09180.1	171
AT2G21330.3;AT2G21330.1	AT2G21330.3;AT2G21330.1	303
AT3G01560.1	AT3G01560.1	403
AT3G01780.1;AT3G01780.2	AT3G01780.1;AT3G01780.2	404
AT3G08943.1	AT3G08943.1	438
AT3G13920.1;AT3G13920.4;AT3G13920.2;AT3G13920.3;AT3G13920.5;AT1G72730.1	AT3G13920.1;AT3G13920.4;AT3G13920.2;AT3G13920.3;AT3G13920.5;AT1G72730.1	474
AT3G50590.2;AT3G50590.1	AT3G50590.2;AT3G50590.1	556
AT4G24800.4;AT4G24800.3;AT4G24800.2;AT4G24800.1	AT4G24800.4;AT4G24800.3;AT4G24800.2;AT4G24800.1	685
AT4G31700.1;AT4G31700.2	AT4G31700.1;AT4G31700.2	714
AT5G11110.1	AT5G11110.1	780
AT5G57460.1	AT5G57460.1	954
FLAGPUP|SUB|SUB_LABEL	FLAGPUP|SUB|SUB_LABEL	1001

## Sheet: imputation and t-test (b)
a two-sided t-test for comparison between biotin eluted samples from biotin or mock treatment, with corrected false positive by permutation-based FDR calculation using thresholds FDR = 0.05 and S0 = 1.
Significant	#NAME?	Difference	Protein IDs	Majority protein IDs	id	Symbol color	Symbol type	Symbol size	Show label	Only identified by site	Reverse	Potential contaminant	Taxonomy IDs	Peptides	Razor + unique peptides	Unique peptides	Sequence coverage [%]	Unique + razor sequence coverage [%]	Unique sequence coverage [%]	Mol. weight [kDa]	Q-value	Score	Intensity	iBAQ peptides	MS/MS count	biotin_mock_rep1	biotin_mock_rep2	biotin_mock_rep3	biotin_ind_rep1	biotin_ind_rep2	biotin_ind_rep3
+	3.7259	5.39042	AT1G20760.1	AT1G20760.1	69	Color2 [DarkGray]	1	4					-1	35	35	35	34.7	34.7	34.7	109.82	0	323.31	232010000	54	100	17.3519	18.535	18.6048	23.5951	23.5482	23.5197
+	4.7676	6.74516	AT1G21630.1;AT1G21630.3;AT1G21630.2;AT1G21630.4	AT1G21630.1;AT1G21630.3;AT1G21630.2;AT1G21630.4	71	Color2 [DarkGray]	1	4					-1	59	59	59	60.2	60.2	60.2	131.85	0	323.31	428540000	63	169	18.1245	17.4991	17.2049	24.4553	24.3627	24.246
+	3.57102	-2.57716	AT1G51980.1;AT1G51980.2	AT1G51980.1	150	Color2 [DarkGray]	1	4					-1	4	4	4	10.7	10.7	10.7	54.401	0	32.273	13165000	24	11	21.219	20.7725	21.0358	18.3479	18.19	18.758
+	3.34762	2.83696	AT2G21330.3;AT2G21330.1	AT2G21330.3;AT2G21330.1	303	Color2 [DarkGray]	1	4					-1	3	2	1	7.2	4.6	2.3	41.807	0	12.682	10972000	20	5	18.3676	18.9333	18.016	21.2878	21.2416	21.2984
+	3.26182	3.05038	AT3G01560.1	AT3G01560.1	403	Color2 [DarkGray]	1	4					-1	4	4	4	14.9	14.9	14.9	55.492	0	35.61	17870000	23	12	18.7396	18.0806	18.5269	21.9535	21.3594	21.1854
+	4.44285	4.21457	AT3G01780.1;AT3G01780.2	AT3G01780.1;AT3G01780.2	404	Color2 [DarkGray]	1	4					-1	40	40	40	32.7	32.7	32.7	130.91	0	323.31	224420000	63	116	19.0177	19.2452	18.6228	23.0739	23.3848	23.0706
+	3.50532	2.94131	AT3G13920.1;AT3G13920.4;AT3G13920.2;AT3G13920.3;AT3G13920.5;AT1G72730.1	AT3G13920.1;AT3G13920.4;AT3G13920.2;AT3G13920.3;AT3G13920.5;AT1G72730.1	474	Color2 [DarkGray]	1	4					-1	7	2	2	28.6	11.2	11.2	46.704	0	17.73	13514000	23	10	18.8635	18.4141	18.088	21.6282	21.2828	21.2786
+	5.37358	4.69689	AT3G50590.2;AT3G50590.1	AT3G50590.2;AT3G50590.1	556	Color2 [DarkGray]	1	4					-1	19	19	19	12.2	12.2	12.2	174.99	0	223.63	121050000	79	49	18.3783	18.7748	18.6283	23.2482	23.4311	23.1928
+	3.33086	2.2937	AT4G24800.4;AT4G24800.3;AT4G24800.2;AT4G24800.1	AT4G24800.4;AT4G24800.3;AT4G24800.2;AT4G24800.1	685	Color2 [DarkGray]	1	4					-1	4	4	4	8.3	8.3	8.3	77.435	0	33.341	8647400	33	9	17.8393	18.5057	18.4637	20.5235	20.5289	20.6373
+	3.40868	4.10454	AT4G31700.1;AT4G31700.2	AT4G31700.1;AT4G31700.2	714	Color2 [DarkGray]	1	4					-1	8	3	3	26	16.4	16.4	28.367	0	27.092	24537000	10	10	18.2304	18.2759	19.3206	22.9309	22.5495	22.6601
+	4.66006	5.61359	AT5G24710.1	AT5G24710.1	863	Color2 [DarkGray]	1	4					-1	36	36	36	27.9	27.9	27.9	148.07	0	323.31	288910000	64	109	18.3054	18.3511	18.2454	24.3964	23.7405	23.6059
+	2.44542	3.63475	AT5G57460.1	AT5G57460.1	954	Color2 [DarkGray]	1	4					-1	11	11	11	17.6	17.6	17.6	70.511	0	142.11	60285000	32	27	17.5885	19.5598	18.927	22.246	22.5576	22.1761
+	5.44986	5.82564	FLAGPUP|SUB|SUB_LABEL	FLAGPUP|SUB|SUB_LABEL	1001	Color2 [DarkGray]	1	4					-1	1	1	1	16.7	16.7	16.7	7.8251	0.0013038	9.6332	33958000	1	10	17.7995	17.4283	17.7666	23.6604	23.5265	23.2845
+	2.24305	4.55258	PafA|BAIT|BAIT_LABEL	PafA|BAIT|BAIT_LABEL	1002	Color2 [DarkGray]	1	4					-1	26	26	26	50.8	50.8	50.8	53.8	0	250.37	189290000	26	75	21.1825	18.8146	19.2247	25.1336	23.9497	23.7964
	0.455639	-0.216442	AT1G02080.2;AT1G02080.3;AT1G02080.1	AT1G02080.2;AT1G02080.3;AT1G02080.1	2	Color2 [DarkGray]	1	4					-1	7	7	7	5.3	5.3	5.3	263.76	0	63.35	10173000	104	20	19.6732	20.2351	19.9168	19.6052	19.5965	19.9741
	0.457523	1.95602	AT1G02780.1	AT1G02780.1	4	Color2 [DarkGray]	1	4					-1	7	7	4	19.6	19.6	14	24.606	0	61.473	98897000	6	31	23.4133	17.7807	23.1862	23.2673	23.6443	23.3366
	0.310717	0.167824	AT1G03090.2;AT1G03090.1	AT1G03090.2;AT1G03090.1	5	Color2 [DarkGray]	1	4					-1	38	38	38	58.3	58.3	58.3	80.45	0	323.31	1213500000	39	234	25.6031	25.0263	25.3772	25.2366	25.726	25.5475
	0.914539	1.88286	AT1G03530.1	AT1G03530.1	6	Color2 [DarkGray]	1	4					-1	4	4	4	7.4	7.4	7.4	88.837	0	42.165	22393000	20	14	19.1412	18.6052	21.7181	21.7568	21.7034	21.6529
	0.00990877	0.00531705	AT1G04270.2;AT5G09510.1;AT1G04270.1;AT5G09510.2;AT5G43640.1	AT1G04270.2;AT5G09510.1;AT1G04270.1	8	Color2 [DarkGray]	1	4					-1	4	4	4	39.7	39.7	39.7	17.058	0	37.469	41683000	7	21	22.1202	22.138	22.3166	21.8664	22.3647	22.3596
	0.939675	-0.228122	AT4G14960.2;AT1G50010.1;AT1G04820.1;AT4G14960.1;AT1G64740.1	AT4G14960.2;AT1G50010.1;AT1G04820.1;AT4G14960.1	12	Color2 [DarkGray]	1	4					-1	14	14	4	35.1	35.1	14.2	49.537	0	260.71	298910000	21	84	24.2603	24.1004	24.098	23.7511	23.9256	24.0976
	0.368623	1.98673	AT5G59970.2;AT5G59970.1;AT5G59690.1;AT3G53730.1;AT3G46320.1;AT3G45930.1;AT2G28740.1;AT1G07820.2;AT1G07820.1;AT1G07660.1;AT1G07660.2	AT5G59970.2;AT5G59970.1;AT5G59690.1;AT3G53730.1;AT3G46320.1;AT3G45930.1;AT2G28740.1;AT1G07820.2;AT1G07820.1;AT1G07660.1;AT1G07660.2	20	Color2 [DarkGray]	1	4					-1	6	6	6	41.7	41.7	41.7	11.409	0	71.461	228620000	6	37	18.3907	25.4975	24.7447	24.8174	24.9467	24.829
	0.0314321	-0.0486933	AT1G07705.1;AT1G07705.2	AT1G07705.1;AT1G07705.2	21	Color2 [DarkGray]	1	4					-1	5	5	5	15.8	15.8	15.8	57.405	0	43.643	9700700	21	16	19.9373	18.9023	19.6399	19.8091	18.6033	19.9211
	0.568281	0.303558	AT5G02570.1;AT2G37470.1;AT5G22880.1;AT3G46030.1;AT1G07790.1;AT5G59910.1;AT3G45980.1;AT2G28720.1;AT3G09480.1;AT3G53650.1	AT5G02570.1;AT2G37470.1;AT5G22880.1;AT3G46030.1;AT1G07790.1;AT5G59910.1;AT3G45980.1;AT2G28720.1;AT3G09480.1;AT3G53650.1	22	Color2 [DarkGray]	1	4					-1	4	4	4	31.1	31.1	31.1	14.544	0	36.77	34758000	7	14	21.8941	21.983	21.8748	21.9392	22.6877	22.0357
	0.464583	1.16259	AT1G07890.8;AT1G07890.7;AT1G07890.5;AT1G07890.4;AT1G07890.3;AT1G07890.2;AT1G07890.1;AT1G07890.6	AT1G07890.8;AT1G07890.7;AT1G07890.5;AT1G07890.4;AT1G07890.3;AT1G07890.2;AT1G07890.1;AT1G07890.6	23	Color2 [DarkGray]	1	4					-1	7	7	7	36	36	36	27.561	0	48.057	26761000	14	18	21.6077	18.4437	21.602	21.3201	22.1652	21.6559
	0.0365863	-0.0186265	AT5G60390.3;AT5G60390.2;AT5G60390.1;AT1G07940.4;AT1G07940.3;AT1G07940.2;AT1G07940.1;AT1G07930.1;AT1G07920.1;AT1G07930.2	AT5G60390.3;AT5G60390.2;AT5G60390.1;AT1G07940.4;AT1G07940.3;AT1G07940.2;AT1G07940.1;AT1G07930.1;AT1G07920.1;AT1G07930.2	24	Color2 [DarkGray]	1	4					-1	18	18	18	37.6	37.6	37.6	49.502	0	263.3	1615600000	25	136	26.6585	26.0968	26.26	26.4018	26.3056	26.2521
	0.495122	-0.111168	AT1G09130.1;AT1G09130.2;AT1G09130.3	AT1G09130.1;AT1G09130.2;AT1G09130.3	26	Color2 [DarkGray]	1	4					-1	6	6	6	20.3	20.3	20.3	36.307	0	48.868	22398000	19	20	21.2733	21.3163	21.1411	21.0006	21.1122	21.2844
	0.952242	-0.371096	AT1G09640.1;AT1G09640.2	AT1G09640.1;AT1G09640.2	29	Color2 [DarkGray]	1	4					-1	9	6	6	29	16.7	16.7	46.66	0	42.458	25700000	17	19	21.8665	21.7254	21.4901	21.0783	21.5822	21.3082
	0.455254	0.373535	AT1G12270.1	AT1G12270.1	39	Color2 [DarkGray]	1	4					-1	7	7	5	19.9	19.9	16.3	64.584	0	44.562	8409500	27	17	19.7614	18.6252	18.9645	19.3516	19.7039	19.416
	1.69211	-0.275553	AT1G13020.1;AT3G26400.1	AT1G13020.1	42	Color2 [DarkGray]	1	4					-1	12	12	12	24.8	24.8	24.8	59.324	0	77.018	18574000	37	26	20.6191	20.7805	20.8139	20.464	20.5357	20.3871
	0.361968	-0.20683	AT1G13440.1;AT1G13440.2	AT1G13440.1;AT1G13440.2	44	Color2 [DarkGray]	1	4					-1	29	3	3	71.3	10.9	10.9	36.913	0	33.008	44060000	21	13	22.6485	22.0574	22.7363	22.4871	22.1607	22.1739
	0.148486	0.0679855	AT1G13730.2;AT1G13730.1	AT1G13730.2;AT1G13730.1	45	Color2 [DarkGray]	1	4					-1	10	10	10	32.7	32.7	32.7	46.803	0	133.94	66687000	20	47	21.868	22.2349	22.2466	22.3892	21.9851	22.1791
	0.355778	0.0520007	AT1G14650.3;AT1G14650.2;AT1G14650.1;AT1G14640.2;AT1G14640.1	AT1G14650.3;AT1G14650.2;AT1G14650.1	48	Color2 [DarkGray]	1	4					-1	16	16	16	31.6	31.6	31.6	87.593	0	144.98	67386000	34	57	21.8355	21.9227	21.8667	22.0362	21.8866	21.8582
	0.146135	0.070509	AT1G14810.1;AT1G14810.2	AT1G14810.1;AT1G14810.2	49	Color2 [DarkGray]	1	4					-1	10	10	10	32.8	32.8	32.8	40.745	0	81.545	27561000	16	33	20.7584	20.1509	20.506	20.5841	20.4762	20.5666
	1.81347	-0.25466	AT1G14980.1;AT1G14980.2	AT1G14980.1;AT1G14980.2	50	Color2 [DarkGray]	1	4					-1	8	8	8	77.6	77.6	77.6	10.812	0	87.648	194860000	7	44	24.0833	24.0352	24.2251	23.8554	23.9073	23.8169
	0.554567	-0.585947	AT1G15130.1	AT1G15130.1	51	Color2 [DarkGray]	1	4					-1	4	4	4	8.9	8.9	8.9	95.208	0	43.438	9413600	45	13	20.0925	20.5147	20.789	20.4532	19.0564	20.1287
	0.782202	0.846085	AT1G15340.1;AT1G15340.2	AT1G15340.1;AT1G15340.2	54	Color2 [DarkGray]	1	4					-1	6	6	6	24.7	24.7	24.7	42.357	0	37.736	7382800	21	14	18.3196	18.8566	20.0079	19.9659	19.8788	19.8776
	1.57281	-0.214709	AT1G16270.3;AT1G16270.2;AT1G16270.1;AT3G24715.3;AT3G24715.2;AT3G24715.1;AT1G04700.2;AT1G04700.1;AT1G14000.1;AT4G23050.1;AT4G23050.2	AT1G16270.3;AT1G16270.2;AT1G16270.1	57	Color2 [DarkGray]	1	4					-1	39	26	26	37.6	30.9	30.9	126.78	0	323.31	744970000	46	151	25.1202	25.1572	25.0802	24.9619	24.9645	24.7872
	0.33223	-0.0995445	AT1G17440.2;AT1G17440.1	AT1G17440.2;AT1G17440.1	60	Color2 [DarkGray]	1	4					-1	15	15	15	34.7	34.7	34.7	74.805	0	130.18	104090000	17	63	22.4813	22.3461	22.6876	22.5389	22.2857	22.3918
	0.671202	1.04314	AT1G20110.1	AT1G20110.1	66	Color2 [DarkGray]	1	4					-1	8	8	8	17.1	17.1	17.1	65.395	0	60.351	25174000	24	32	18.6604	20.6678	20.7408	21.2449	21.2495	20.704
	0.689932	0.571871	AT1G21700.1	AT1G21700.1	72	Color2 [DarkGray]	1	4					-1	5	5	5	8.1	8.1	8.1	88.249	0	39.664	12330000	33	17	19.4311	20.219	20.7039	20.5538	20.7821	20.7336
	1.84231	0.472509	AT4G09800.1;AT1G34030.1;AT1G22780.1	AT4G09800.1;AT1G34030.1;AT1G22780.1	74	Color2 [DarkGray]	1	4					-1	6	6	6	37.5	37.5	37.5	17.545	0	79.575	41160000	8	24	21.7817	21.5909	21.65	21.9492	22.2619	22.229
	1.08632	-0.231276	AT1G23100.1	AT1G23100.1	77	Color2 [DarkGray]	1	4					-1	5	5	5	64.9	64.9	64.9	10.546	0	42.586	32837000	7	24	21.3824	21.138	21.4609	21.0936	21.0559	21.1379
	1.36908	-0.313128	AT1G23280.1	AT1G23280.1	80	Color2 [DarkGray]	1	4					-1	7	7	7	25.4	25.4	25.4	35.759	0	75.596	33837000	15	30	21.5757	21.4984	21.3912	21.3546	21.1248	21.0465
	0.177331	-0.0997721	AT3G62250.1;AT2G47110.1;AT1G23410.1;AT2G47110.2;AT4G05320.2;AT5G20620.1;AT4G05320.3;AT4G05320.6;AT3G52590.1;AT2G36170.1;AT4G05320.4;AT1G65350.1;AT5G03240.1;AT5G03240.3;AT5G20620.2;AT5G03240.2;AT4G05320.5;AT4G05320.1;AT4G02890.4;AT4G02890.3;AT4G05320.8;AT4G05050.4;AT4G05320.7;AT2G35635.1;AT1G31340.1;AT5G37640.1;AT4G02890.1;AT4G02890.2;AT4G05050.1;AT4G05050.2;AT4G05050.3;AT1G55060.1;AT3G09790.1;AT3…	AT3G62250.1;AT2G47110.1;AT1G23410.1;AT2G47110.2;AT4G05320.2;AT5G20620.1;AT4G05320.3;AT4G05320.6;AT3G52590.1;AT2G36170.1;AT4G05320.4;AT1G65350.1;AT5G03240.1;AT5G03240.3;AT5G20620.2;AT5G03240.2;AT4G05320.5;AT4G05320.1;AT4G02890.4;AT4G02890.3;AT4G05320.8;AT4G05050.4;AT4G05320.7;AT2G35635.1;AT1G31340.1;AT5G37640.1;AT4G02890.1;AT4G02890.2;AT4G05050.1;AT4G05050.2;AT4G05050.3;AT1G55060.1;AT3G09790.1;AT3…	82	Color2 [DarkGray]	1	4					-1	9	9	9	32.5	32.5	32.5	17.797	0	110.59	166770000	7	55	23.4192	22.9538	23.5715	23.0227	23.2363	23.3861
	0.985566	-0.348994	AT1G24050.1	AT1G24050.1	83	Color2 [DarkGray]	1	4					-1	6	6	6	56.9	56.9	56.9	20.491	0	67.251	16772000	10	21	20.7091	21.1578	20.6922	20.399	20.6247	20.4885
	1.01312	0.468409	AT1G24300.1;AT1G24300.2;AT1G24300.3	AT1G24300.1;AT1G24300.2;AT1G24300.3	85	Color2 [DarkGray]	1	4					-1	46	46	38	50	50	41.4	166.27	0	323.31	183340000	77	159	21.5377	21.5798	21.962	22.4383	21.8525	22.194
	0.0117265	0.01909	AT1G24510.1;AT1G24510.2;AT1G24510.3;AT1G67760.1	AT1G24510.1;AT1G24510.2;AT1G24510.3	86	Color2 [DarkGray]	1	4					-1	6	6	6	18.9	18.9	18.9	59.384	0	181.31	58107000	30	19	22.7835	22.949	22.6394	22.1076	22.4735	23.848
	1.97885	-0.414607	AT1G26110.2;AT1G26110.1	AT1G26110.2;AT1G26110.1	87	Color2 [DarkGray]	1	4					-1	16	16	16	23.1	23.1	23.1	63.66	0	323.31	679560000	17	115	25.4626	25.568	25.4077	24.9089	25.1308	25.1548
	0.479747	2.22003	AT1G26630.1;AT1G26630.2	AT1G26630.1;AT1G26630.2	89	Color2 [DarkGray]	1	4					-1	6	6	4	36.5	36.5	27	17.14	0	104.41	107200000	10	32	17.9176	23.953	23.9225	24.1064	24.3646	23.9823
	0.985577	-0.52359	AT1G27090.1	AT1G27090.1	90	Color2 [DarkGray]	1	4					-1	8	8	8	29.5	29.5	29.5	46.018	0	97.495	25550000	23	24	21.7059	21.5771	22.0143	21.1204	21.6559	20.9503
	0.385395	0.916097	AT1G27430.1;AT1G27430.2;AT1G27430.3	AT1G27430.1;AT1G27430.2;AT1G27430.3	92	Color2 [DarkGray]	1	4					-1	31	23	23	38.5	29.8	29.8	165.43	0	211.48	51485000	81	55	20.1451	19.6509	21.6543	22.6058	19.889	21.7037
	0.406033	0.207093	AT1G29250.1;AT2G34160.1	AT1G29250.1	94	Color2 [DarkGray]	1	4					-1	5	5	5	46.9	46.9	46.9	14.574	0	38.378	16489000	9	16	20.8012	20.2139	20.7223	20.9133	20.5594	20.8861
	0.08382	-0.0286846	AT1G29350.1	AT1G29350.1	95	Color2 [DarkGray]	1	4					-1	6	6	1	8.9	8.9	1.9	90.878	0	45.12	20743000	22	19	20.5231	20.4043	20.5959	20.6868	20.4233	20.3271
	0.835085	-0.229971	AT1G30230.1;AT1G30230.2	AT1G30230.1;AT1G30230.2	96	Color2 [DarkGray]	1	4					-1	8	4	4	45.5	32	32	25.132	0	33.97	35253000	11	21	22.0906	21.8243	21.711	21.5877	21.5821	21.7662
	0.842442	0.219079	AT1G30480.1	AT1G30480.1	97	Color2 [DarkGray]	1	4					-1	16	16	16	40.8	40.8	40.8	42.318	0	257.19	497300000	22	112	24.9407	24.9038	24.9226	25.3793	25.0535	24.9916
	2.62592	1.42589	AT1G31760.1	AT1G31760.1	103	Color2 [DarkGray]	1	4					-1	4	4	4	42	42	42	12.296	0	25.692	5613700	6	12	18.6647	17.9881	18.4797	19.8658	19.8392	19.7052
	0.182733	-0.595165	AT1G31812.1	AT1G31812.1	104	Color2 [DarkGray]	1	4					-1	3	3	3	33.7	33.7	33.7	10.386	0	22.867	12217000	6	13	20.6895	18.4528	20.8271	19.2092	21.1659	17.8089
	0.461442	0.429803	AT1G33680.1;AT4G10070.1	AT1G33680.1	108	Color2 [DarkGray]	1	4					-1	5	5	5	8.7	8.7	8.7	80.438	0	30.566	7003600	33	15	18.6617	19.8748	19.7698	19.6944	20.06	19.8412
	0.0305341	-0.0106239	AT1G34220.2;AT1G34220.1	AT1G34220.2;AT1G34220.1	110	Color2 [DarkGray]	1	4					-1	39	39	39	51.7	51.7	51.7	68.958	0	323.31	6764600000	32	401	27.1337	27.51	27.2183	27.3159	27.2246	27.2896
	0.153225	-0.415861	AT1G34430.1	AT1G34430.1	112	Color2 [DarkGray]	1	4					-1	2	2	2	6.2	6.2	6.2	48.306	0	20.646	12954000	23	14	19.0123	20.9339	20.6096	20.6741	20.5053	18.1288
	0.406935	-0.863644	AT1G35160.1;AT1G35160.2	AT1G35160.1;AT1G35160.2	113	Color2 [DarkGray]	1	4					-1	6	2	2	28.1	12.4	12.4	30.194	0	14.965	4699800	18	6	20.0547	18.6657	20.321	17.8481	20.2699	18.3324
	0.123816	-0.0301628	AT1G35460.1;AT1G35460.2	AT1G35460.1	114	Color2 [DarkGray]	1	4					-1	6	5	3	25.1	25.1	25.1	28.526	0	63.738	38980000	11	30	21.7691	21.7005	21.881	21.6338	21.7439	21.8823
	0.441867	0.0338198	AT1G36160.2;AT1G36160.1	AT1G36160.2;AT1G36160.1	116	Color2 [DarkGray]	1	4					-1	42	26	26	23.2	13.5	13.5	251.38	0	323.31	267270000	123	107	23.6318	23.5709	23.5456	23.6557	23.5857	23.6084
	0.40029	0.0879993	AT1G36180.1;AT1G36180.2;AT1G36180.3	AT1G36180.1	117	Color2 [DarkGray]	1	4					-1	74	74	58	34.1	34.1	26.2	262.73	0	323.31	1260400000	125	336	25.0158	24.8741	24.8382	24.8462	25.0755	25.0704
	0.152437	-0.525695	AT1G36390.2;AT1G36390.1	AT1G36390.2;AT1G36390.1	118	Color2 [DarkGray]	1	4					-1	4	4	4	12.2	12.2	12.2	31.223	0	22.837	11032000	18	12	20.5076	20.2886	17.4854	17.5376	20.443	18.7239
	0.473964	-1.47963	AT1G42960.1	AT1G42960.1	119	Color2 [DarkGray]	1	4					-1	3	3	3	16.1	16.1	16.1	17.829	0	23.689	17203000	9	13	21.3822	21.1579	21.3445	17.1259	21.4008	20.919
	0.40963	0.377775	AT1G43700.1	AT1G43700.1	122	Color2 [DarkGray]	1	4					-1	6	6	6	22.9	22.9	22.9	37.791	0	47.01	8246700	15	18	18.5182	19.7931	19.4975	19.6884	19.7432	19.5105
	0.769178	-0.199243	AT1G48920.1;AT3G18610.2;AT3G18610.3;AT3G18610.1	AT1G48920.1	131	Color2 [DarkGray]	1	4					-1	20	20	20	35.9	35.9	35.9	58.773	0	193.05	170130000	31	93	23.2933	23.181	23.3243	22.8518	23.2222	23.127
	0.482257	-0.186529	AT1G49600.1;AT1G49600.3;AT1G49600.2;AT1G47490.2;AT1G47500.2;AT1G47490.1;AT1G47500.1	AT1G49600.1;AT1G49600.3;AT1G49600.2	133	Color2 [DarkGray]	1	4					-1	24	24	15	40.7	40.7	31	48.483	0	323.31	8243500000	13	215	28.9574	29.3096	28.8183	28.9923	28.7059	28.8276
	0.131747	0.0403347	AT1G49760.2;AT1G49760.1	AT1G49760.2;AT1G49760.1	134	Color2 [DarkGray]	1	4					-1	27	26	25	46.5	45.5	41.6	72.779	0	223.94	130320000	31	92	22.1907	21.8687	21.9768	21.9364	22.0773	22.1435
	0.185619	0.121953	AT1G50200.1;AT1G50200.2	AT1G50200.1;AT1G50200.2	135	Color2 [DarkGray]	1	4					-1	7	7	7	13.6	13.6	13.6	110.49	0	46.816	11210000	54	15	20.5388	19.6961	20.2839	20.3392	20.294	20.2514
	0.840592	0.207826	AT1G51140.1	AT1G51140.1	140	Color2 [DarkGray]	1	4					-1	9	9	9	36.7	36.7	36.7	41.716	0	87.437	60384000	18	41	22.0375	22.2936	22.1795	22.4042	22.5151	22.2149
	0.621765	0.966937	AT1G51560.1	AT1G51560.1	143	Color2 [DarkGray]	1	4					-1	2	2	2	7.7	7.7	7.7	43.582	0	15.045	8854200	18	8	17.9881	19.7468	20.2809	20.2072	20.2119	20.4976
	2.20614	1.50856	AT1G51580.1	AT1G51580.1	144	Color2 [DarkGray]	1	4					-1	4	4	4	9.2	9.2	9.2	67.114	0	26.373	5388200	34	9	18.4876	18.6848	17.8578	19.663	19.7656	20.1272
	0.442145	-0.135162	AT1G51600.2;AT1G51600.1;AT3G21175.3;AT3G21175.2	AT1G51600.2;AT1G51600.1	145	Color2 [DarkGray]	1	4					-1	12	12	11	35.1	35.1	35.1	33.129	0	114.77	259650000	10	67	24.498	24.3305	24.5335	24.5077	24.1096	24.3392
	0.538677	0.589881	AT1G52360.3;AT1G52360.4;AT1G52360.1;AT1G52360.2;AT3G15980.1;AT3G15980.7;AT3G15980.6;AT3G15980.4;AT3G15980.3;AT3G15980.2;AT3G15980.5	AT1G52360.3;AT1G52360.4;AT1G52360.1;AT1G52360.2;AT3G15980.1;AT3G15980.7;AT3G15980.6;AT3G15980.4;AT3G15980.3;AT3G15980.2;AT3G15980.5	152	Color2 [DarkGray]	1	4					-1	2	2	2	2.2	2.2	2.2	104.22	0	24.519	5565600	48	11	18.4255	19.5959	19.9879	19.7454	19.8927	20.1408
	0.934756	-0.261251	AT1G52670.1	AT1G52670.1	154	Color2 [DarkGray]	1	4					-1	19	19	18	62.4	62.4	60.6	29.573	0	323.31	35854000000	12	378	30.7574	31.1132	30.6988	30.628	30.5902	30.5675
	0.0862771	-0.0464414	AT1G53240.1;AT3G15020.2;AT3G15020.1	AT1G53240.1	157	Color2 [DarkGray]	1	4					-1	10	10	9	38.4	38.4	35.2	35.804	0	127.48	85167000	15	43	22.7524	22.8749	22.7664	22.3885	23.0113	22.8545
	0.469269	-0.163059	AT1G54140.1	AT1G54140.1	160	Color2 [DarkGray]	1	4					-1	7	7	7	39.3	39.3	39.3	20.597	0	84.905	71427000	9	24	22.9762	23.0976	22.6014	22.763	22.7003	22.7227
	1.36299	0.205779	AT1G54170.1;AT3G14010.4;AT3G14010.3;AT3G14010.2;AT3G14010.1;AT3G14010.5	AT1G54170.1	161	Color2 [DarkGray]	1	4					-1	20	20	20	37.6	37.6	37.6	65.389	0	154.24	106470000	33	78	21.7897	21.7945	21.9175	22.1522	21.9971	21.9698
	0.035613	0.0137685	AT1G54270.1;AT1G54270.2	AT1G54270.1;AT1G54270.2	162	Color2 [DarkGray]	1	4					-1	8	8	3	24	24	6.6	46.762	0	69.672	82461000	23	40	23.1654	23.3135	23.5009	23.215	23.2967	23.5094
	0.0146702	-0.01032	AT1G54360.4;AT1G54360.6	AT1G54360.4;AT1G54360.6	164	Color2 [DarkGray]	1	4					-1	12	12	8	20.2	20.2	15.2	59.135	0	96.099	44170000	22	45	21.3527	20.8843	21.1594	21.4892	21.0163	20.8598
	1.03758	-1.74918	AT1G54630.1	AT1G54630.1	166	Color2 [DarkGray]	1	4					-1	3	3	2	27.9	27.9	16.9	14.65	0	61.038	22256000	8	12	22.0465	21.5306	21.7562	18.8847	21.513	19.688
	0.0157896	-0.00855637	AT1G56070.3;AT1G56070.2;AT1G56070.1;AT3G12915.2;AT3G12915.1	AT1G56070.3;AT1G56070.2;AT1G56070.1	170	Color2 [DarkGray]	1	4					-1	30	30	30	41	41	41	93.89	0	308.37	364850000	44	131	24.6437	24.1651	24.4469	24.2966	24.6379	24.2956
	1.39614	1.61092	AT4G02080.1;AT3G62560.1;AT1G56330.1;AT1G09180.1	AT4G02080.1;AT3G62560.1;AT1G56330.1;AT1G09180.1	171	Color2 [DarkGray]	1	4					-1	4	4	4	29	29	29	22.03	0	26.186	6977800	13	12	19.1347	19.4047	17.7157	20.1269	20.4214	20.5395
	0.223852	0.259068	AT1G56340.1;AT1G56340.2	AT1G56340.1;AT1G56340.2	172	Color2 [DarkGray]	1	4					-1	5	5	5	12.2	12.2	12.2	48.527	0	43.25	14338000	27	17	20.547	20.732	19.343	20.3919	20.7036	20.3036
	0.352578	-0.148764	AT1G57720.2;AT1G57720.1	AT1G57720.2;AT1G57720.1	173	Color2 [DarkGray]	1	4					-1	12	12	9	39	39	26.6	46.4	0	91.494	75305000	18	47	23.1019	22.8648	22.9009	22.5044	23.0435	22.8734
	1.43195	0.199346	AT1G62390.1	AT1G62390.1	185	Color2 [DarkGray]	1	4					-1	30	30	30	40.5	40.5	40.5	82.707	0	322.46	310190000	39	127	23.4024	23.2022	23.332	23.5621	23.4676	23.5048
	2.81149	0.427555	AT1G65260.2;AT1G65260.1	AT1G65260.2;AT1G65260.1	191	Color2 [DarkGray]	1	4					-1	33	33	33	80.3	80.3	80.3	28.912	0	323.31	813400000	16	180	24.5424	24.4548	24.3966	24.9609	24.8767	24.8389
	1.35348	-0.521938	AT1G65980.1;AT1G65980.2;AT1G65970.1;AT1G60740.1	AT1G65980.1	194	Color2 [DarkGray]	1	4					-1	7	7	7	50	50	50	17.428	0	195.89	81727000	6	38	22.8021	23.165	22.5586	22.3719	22.2459	22.3421
	0.929781	-0.153945	AT1G66240.2;AT1G66240.1	AT1G66240.2;AT1G66240.1	195	Color2 [DarkGray]	1	4					-1	5	5	5	71.2	71.2	71.2	7.0731	0	37.746	27945000	4	19	21.8409	21.744	22.0008	21.7465	21.6946	21.6827
	1.35077	0.525752	AT1G66580.1;AT1G26910.1;AT1G26910.2	AT1G66580.1;AT1G26910.1	196	Color2 [DarkGray]	1	4					-1	5	5	2	23.5	23.5	14.9	24.929	0	39.018	14948000	11	14	20.6219	20.4684	21.0547	21.1449	21.2906	21.2867
	0.171721	0.0578327	AT1G67230.1	AT1G67230.1	197	Color2 [DarkGray]	1	4					-1	76	76	76	56.9	56.9	56.9	129.09	0	323.31	945320000	54	318	24.3693	23.9615	24.2259	24.2788	24.296	24.1554
	2.30836	0.454163	AT1G71260.1	AT1G71260.1	205	Color2 [DarkGray]	1	4					-1	7	7	7	36.6	36.6	36.6	26.295	0	70.145	122840000	15	27	23.9011	23.9752	23.7947	24.3147	24.4627	24.2561
	1.86044	0.312241	AT1G71770.2;AT1G71770.1	AT1G71770.2;AT1G71770.1	206	Color2 [DarkGray]	1	4					-1	39	38	35	60.7	60.7	57.2	74.422	0	323.31	933370000	33	228	24.7222	24.6703	24.5714	24.88	25.0819	24.9388
	0.594759	0.148221	AT1G72370.2;AT1G72370.1;AT3G04770.2;AT3G04770.1	AT1G72370.2;AT1G72370.1	210	Color2 [DarkGray]	1	4					-1	4	4	4	24.5	24.5	24.5	31.981	0	63.834	18440000	14	15	21.111	21.2989	21.3627	21.514	21.2452	21.4581
	0.0742418	-0.0211239	AT1G72390.2;AT1G72390.1	AT1G72390.2;AT1G72390.1	211	Color2 [DarkGray]	1	4					-1	47	47	47	48.1	48.1	48.1	143.31	0	323.31	388780000	53	218	23.0177	22.8463	23.0182	23.1017	22.8786	22.8385
	0.566827	0.268738	AT1G74060.1;AT1G74050.1	AT1G74060.1;AT1G74050.1	214	Color2 [DarkGray]	1	4					-1	6	6	1	18.9	18.9	4.3	26.008	0	64.919	80378000	11	28	22.5182	22.5625	22.8286	23.0679	23.1155	22.5321
	0.265092	-0.0874901	AT1G74230.1	AT1G74230.1	215	Color2 [DarkGray]	1	4					-1	6	6	6	26	26	26	28.728	0	81.599	27174000	6	24	21.5077	21.2385	21.56	21.4016	21.4632	21.1789
	0.118716	-0.0827249	AT1G77120.1	AT1G77120.1	223	Color2 [DarkGray]	1	4					-1	7	7	7	20.6	20.6	20.6	41.178	0	58.304	68710000	20	24	22.9971	22.3612	23.1465	22.8558	22.8068	22.594
	0.178344	-0.0298824	AT1G79090.3;AT1G79090.2;AT1G79090.1	AT1G79090.3;AT1G79090.2;AT1G79090.1	225	Color2 [DarkGray]	1	4					-1	20	20	20	30.4	30.4	30.4	88.839	0	311.49	266240000	38	94	23.2748	23.3863	23.1929	23.3147	23.2321	23.2176
	0.0306346	0.0948722	AT1G79230.1;AT1G79230.3;AT1G79230.2	AT1G79230.1;AT1G79230.3;AT1G79230.2	226	Color2 [DarkGray]	1	4					-1	6	6	6	24.5	24.5	24.5	41.893	0	55.871	13045000	25	17	18.2262	20.6141	20.6379	18.593	20.7286	20.4412
	0.866183	-0.108747	AT1G79530.1	AT1G79530.1	228	Color2 [DarkGray]	1	4					-1	11	9	4	39.1	36.5	21.3	44.83	0	118.63	52799000	24	33	21.8176	21.7457	21.7416	21.6531	21.7543	21.5713
	0.237267	-0.13212	AT1G79550.2;AT1G79550.1	AT1G79550.2;AT1G79550.1	229	Color2 [DarkGray]	1	4					-1	8	8	6	31.9	31.9	31.9	42.131	0	66.978	21196000	25	27	20.2563	20.5589	20.6176	20.0089	20.6604	20.3671
	0.420658	-0.0909322	AT1G79570.2;AT1G79570.1;AT1G79570.5;AT1G79570.4;AT1G79570.3	AT1G79570.2;AT1G79570.1;AT1G79570.5;AT1G79570.4;AT1G79570.3	230	Color2 [DarkGray]	1	4					-1	68	68	55	52.9	52.9	46.7	137.24	0	323.31	2010800000	55	443	26.1622	26.0956	26.183	25.964	26.2326	25.9715
	0.815757	-0.189216	AT1G79930.2;AT1G79930.1	AT1G79930.2;AT1G79930.1	232	Color2 [DarkGray]	1	4					-1	20	20	6	22.2	22.2	5.3	87.316	0	165.58	148680000	44	85	22.6186	22.453	22.7143	22.2559	22.4951	22.4672
	0.0129976	0.00359344	AT2G01190.1	AT2G01190.1	234	Color2 [DarkGray]	1	4					-1	33	33	33	45.3	45.3	45.3	77.337	0	323.31	14688000000	22	334	30.0545	30.143	30.0913	30.0358	30.2733	29.9905
	0.830091	0.298175	AT2G02470.2;AT2G02470.3;AT2G02470.1;AT1G14510.1	AT2G02470.2;AT2G02470.3;AT2G02470.1;AT1G14510.1	237	Color2 [DarkGray]	1	4					-1	2	2	2	8.9	8.9	8.9	27.844	0	14.967	5996500	9	8	19.2074	19.4259	19.6436	19.7741	19.8824	19.5149
	0.326131	0.204184	AT2G02560.2;AT2G02560.1	AT2G02560.2;AT2G02560.1	239	Color2 [DarkGray]	1	4					-1	2	2	2	1.9	1.9	1.9	134.62	0	22.278	9948500	68	12	20.0148	20.1909	20.4145	20.0022	20.4329	20.7976
	0.1088	0.611142	AT2G02740.1	AT2G02740.1	240	Color2 [DarkGray]	1	4					-1	3	3	3	7.5	7.5	7.5	29.728	0	30.53	47926000	16	12	18.8211	22.5801	22.6207	23.7076	23.3742	18.7735
	0.344552	-0.501156	AT2G02790.3;AT2G02790.2;AT2G02790.1;AT1G14380.7;AT1G14380.6;AT1G14380.5;AT1G14380.2;AT1G14380.4;AT1G14380.3;AT1G14380.1	AT2G02790.3;AT2G02790.2;AT2G02790.1	241	Color2 [DarkGray]	1	4					-1	4	4	4	10.4	10.4	10.4	65.266	0	25.701	6303700	27	13	19.5174	19.7841	19.6058	19.7017	19.7618	17.9403
	0.492461	-1.82001	AT2G03680.3;AT2G03680.2;AT2G03680.1	AT2G03680.3;AT2G03680.2;AT2G03680.1	246	Color2 [DarkGray]	1	4					-1	3	3	3	42.9	42.9	42.9	11.92	0	51.877	48196000	5	17	22.6669	23.0895	22.7898	22.6945	17.8171	22.5746
	0.410021	0.137412	AT2G04030.2;AT2G04030.1	AT2G04030.2;AT2G04030.1	248	Color2 [DarkGray]	1	4					-1	11	11	11	21.6	21.6	21.6	88.255	0	106.57	35619000	47	35	21.1902	21.1353	21.4441	21.2824	21.2938	21.6056
	0.15241	0.506715	AT3G10610.1;AT2G05220.2;AT2G05220.1;AT5G04800.4;AT5G04800.3;AT5G04800.2;AT5G04800.1;AT2G04390.1	AT3G10610.1;AT2G05220.2;AT2G05220.1;AT5G04800.4;AT5G04800.3;AT5G04800.2;AT5G04800.1;AT2G04390.1	249	Color2 [DarkGray]	1	4					-1	5	5	5	22.9	22.9	22.9	16.036	0	30.814	14007000	4	16	20.5894	17.5739	20.7925	18.8061	20.8755	20.7943
	1.85113	0.258388	AT2G04400.1	AT2G04400.1	250	Color2 [DarkGray]	1	4					-1	10	10	10	31.3	31.3	31.3	44.577	0	72.796	21534000	27	31	20.7153	20.5449	20.5741	20.8228	20.8535	20.9332
	0.0405046	0.0254103	AT2G05710.1;AT4G35830.1;AT4G35830.2;AT4G26970.1	AT2G05710.1	252	Color2 [DarkGray]	1	4					-1	11	11	11	11.4	11.4	11.4	108.2	0	68.408	36344000	50	33	21.363	20.7634	21.2423	20.934	21.295	21.2159
	0.0115437	-0.0342795	AT2G05830.3;AT2G05830.2;AT2G05830.4;AT2G05830.1	AT2G05830.3;AT2G05830.2;AT2G05830.4;AT2G05830.1	253	Color2 [DarkGray]	1	4					-1	4	4	4	23.6	23.6	23.6	34.275	0	28.887	8238800	20	11	20.5417	18.0242	20.6542	19.0456	20.621	19.4506
	0.327992	0.590292	AT2G06530.2;AT2G06530.1	AT2G06530.2;AT2G06530.1	255	Color2 [DarkGray]	1	4					-1	5	5	5	29.9	29.9	29.9	22.79	0	57.8	15567000	8	19	20.374	18.1753	20.3255	19.9263	20.43	20.2894
	1.0632	3.43624	AT2G07360.1;AT2G07360.2	AT2G07360.1;AT2G07360.2	256	Color2 [DarkGray]	1	4					-1	29	29	29	30.1	30.1	30.1	130.08	0	323.31	322570000	53	84	23.0794	18.6304	23.2693	25.182	25.208	24.8979
	1.30666	-0.176462	AT2G07698.1	AT2G07698.1	257	Color2 [DarkGray]	1	4					-1	16	16	16	18.3	18.3	18.3	85.932	0	166.14	113900000	32	75	22.4529	22.3166	22.5057	22.2908	22.2614	22.1937
	0.358332	-0.201742	AT2G16060.1	AT2G16060.1	265	Color2 [DarkGray]	1	4					-1	8	8	8	47.5	47.5	47.5	18.034	0	61.093	21419000	11	24	21.2271	20.5764	20.9984	20.9314	20.4704	20.795
	0.785867	-0.645041	AT2G16440.1	AT2G16440.1	266	Color2 [DarkGray]	1	4					-1	3	3	3	5.5	5.5	5.5	93.655	0	18.53	2845100	43	9	18.5175	19.3826	19.0916	18.0494	18.9132	18.094
	0.649619	0.535472	AT2G16570.1;AT4G34740.1;AT4G38880.1	AT2G16570.1;AT4G34740.1	267	Color2 [DarkGray]	1	4					-1	9	9	9	14	14	14	61.842	0	103.84	21533000	24	20	20.7193	20.649	21.6268	21.9151	21.4433	21.243
	0.0443592	0.0354341	AT2G16600.2;AT2G16600.1	AT2G16600.2;AT2G16600.1	268	Color2 [DarkGray]	1	4					-1	7	7	5	41.7	41.7	35.8	15.992	0	91.605	41787000	9	29	22.0067	21.1305	21.5979	21.4691	21.8096	21.5626
	0.078187	-0.13036	AT5G07090.3;AT5G07090.2;AT2G17360.1;AT5G58420.1;AT5G07090.1;AT2G17360.2	AT5G07090.3;AT5G07090.2;AT2G17360.1;AT5G58420.1;AT5G07090.1	270	Color2 [DarkGray]	1	4					-1	5	5	5	25	25	25	27.707	0	31.88	9473100	16	13	19.6942	18.5957	19.8141	19.4288	18.3959	19.8882
	0.43097	0.126995	AT2G17850.3;AT2G17850.1;AT2G17850.2	AT2G17850.3;AT2G17850.1;AT2G17850.2	274	Color2 [DarkGray]	1	4					-1	7	7	7	44.7	44.7	44.7	21.815	0	109.8	180910000	11	36	23.9628	23.8409	23.9011	24.2559	23.8428	23.9871
	0.429958	0.879395	AT2G17870.1	AT2G17870.1	275	Color2 [DarkGray]	1	4					-1	3	3	3	20.6	20.6	20.6	29.564	0	32.105	21789000	18	11	21.5985	22.1766	19.3546	22.0155	21.6187	22.1337
	0.150381	-0.0346654	AT2G17930.1	AT2G17930.1	276	Color2 [DarkGray]	1	4					-1	21	21	18	8.6	8.6	7.3	436.35	0	165.07	94562000	224	72	22.4143	22.2667	22.396	22.1865	22.3553	22.4312
	0.11273	-0.0547708	AT2G18040.1	AT2G18040.1	279	Color2 [DarkGray]	1	4					-1	7	7	7	52.1	52.1	52.1	13.015	0	58.923	47346000	9	25	21.79	21.6396	22.0599	21.7718	21.9952	21.5583
	1.11846	-0.318415	AT2G18110.1	AT2G18110.1	280	Color2 [DarkGray]	1	4					-1	9	8	5	45.5	41.1	32	25.266	0	61.154	42986000	11	32	21.7214	21.9258	21.5933	21.2601	21.4463	21.5789
	0.84981	-0.839434	AT2G18330.1	AT2G18330.1	281	Color2 [DarkGray]	1	4					-1	4	4	4	11.2	11.2	11.2	71.194	0	35.868	11927000	38	14	20.684	20.9206	20.4854	20.4309	20.1512	18.9896
	0.0318542	-0.0112807	AT2G19390.2;AT2G19390.1	AT2G19390.2;AT2G19390.1	283	Color2 [DarkGray]	1	4					-1	25	25	22	29.3	29.3	26.3	133.36	0	215.67	120190000	53	101	22.184	21.9254	21.9549	22.1816	21.9509	21.898
	0.354251	0.858867	AT2G19480.3;AT2G19480.2;AT2G19480.1;AT5G56950.1	AT2G19480.3;AT2G19480.2;AT2G19480.1	284	Color2 [DarkGray]	1	4					-1	4	4	4	18	18	18	42.846	0	41.128	19571000	13	14	21.2887	18.4873	21.6375	21.0303	21.5055	21.4544
	0.434455	0.139182	AT2G19730.3;AT2G19730.2;AT2G19730.1	AT2G19730.3;AT2G19730.2;AT2G19730.1	286	Color2 [DarkGray]	1	4					-1	8	8	7	47.6	47.6	38.5	15.895	0	96.799	148500000	7	37	23.4532	23.3142	23.5121	23.3327	23.7558	23.6086
	0.575075	-0.213364	AT4G29040.1;AT2G20140.1	AT4G29040.1;AT2G20140.1	289	Color2 [DarkGray]	1	4					-1	7	7	7	24.4	24.4	24.4	49.369	0	92.364	39876000	25	32	21.7696	21.5243	21.462	21.6316	21.3118	21.1724
	1.04934	-0.190698	AT2G20420.1	AT2G20420.1	291	Color2 [DarkGray]	1	4					-1	12	12	12	22.6	22.6	22.6	45.345	0	96.658	47054000	28	40	21.5245	21.4509	21.6114	21.2544	21.4808	21.2793
	0.221074	-0.0630989	AT2G20550.1;AT2G20550.2;AT2G20560.1	AT2G20550.1;AT2G20550.2	293	Color2 [DarkGray]	1	4					-1	21	21	21	71.1	71.1	71.1	30.701	0	323.31	2266000000	15	174	27.4515	27.6393	27.3036	27.5002	27.3921	27.3129
	0.360027	-0.989021	AT2G20580.1;AT4G28470.1;AT4G08140.1	AT2G20580.1	294	Color2 [DarkGray]	1	4					-1	9	9	9	14.8	14.8	14.8	98.143	0	80.017	24054000	54	25	20.8493	20.9652	21.1631	17.7206	21.1409	21.1491
	0.705296	1.62596	AT2G20760.1;AT3G51890.1	AT2G20760.1	295	Color2 [DarkGray]	1	4					-1	7	7	7	15.1	15.1	15.1	37.225	0	45.816	43006000	10	22	22.0151	18.7932	21.8685	22.5967	22.4026	22.5555
	0.480649	0.263372	AT2G20800.1	AT2G20800.1	296	Color2 [DarkGray]	1	4					-1	6	6	6	14.6	14.6	14.6	65.371	0	45.856	13453000	29	18	20.209	20.9239	20.3693	20.9037	20.5732	20.8154
	0.810948	1.21827	AT2G21230.4;AT2G21230.1;AT2G21230.3;AT2G21230.2	AT2G21230.4;AT2G21230.1;AT2G21230.3;AT2G21230.2	301	Color2 [DarkGray]	1	4					-1	5	5	5	12.5	12.5	12.5	56.326	0	39.591	6204200	25	11	17.7895	17.9585	19.9072	19.8246	19.4933	19.992
	1.11479	0.258834	AT2G21580.2;AT2G21580.1	AT2G21580.2;AT2G21580.1	304	Color2 [DarkGray]	1	4					-1	8	8	3	57.9	57.9	21.5	11.941	0	61.536	18351000	6	20	20.5317	20.3064	20.4068	20.5524	20.8439	20.6251
	0.697683	-0.16271	AT2G21660.1;AT2G21660.2	AT2G21660.1;AT2G21660.2	306	Color2 [DarkGray]	1	4					-1	11	11	7	53.4	53.4	46	16.89	0	116.27	86817000	12	48	22.9515	22.6304	22.8394	22.7278	22.5566	22.6487
	1.34472	-0.383315	AT2G21870.2;AT2G21870.1	AT2G21870.2;AT2G21870.1	307	Color2 [DarkGray]	1	4					-1	8	8	8	44.5	44.5	44.5	25.16	0	72.832	23328000	12	26	20.8976	20.9689	21.2973	20.6105	20.6303	20.773
	1.08225	0.194061	AT2G22360.1	AT2G22360.1	309	Color2 [DarkGray]	1	4					-1	13	13	9	19.5	19.5	14	47.761	0	125.53	95591000	24	48	22.5683	22.6184	22.669	22.9031	22.8799	22.6549
	0.875756	0.218367	AT2G23350.1	AT2G23350.1	310	Color2 [DarkGray]	1	4					-1	42	42	40	53.9	53.9	52.9	71.652	0	323.31	1405800000	30	242	25.5358	25.1613	25.4062	25.5175	25.6477	25.5931
	0.681436	0.168916	AT2G25720.1	AT2G25720.1	315	Color2 [DarkGray]	1	4					-1	13	13	13	77.8	77.8	77.8	13.026	0	151.64	411940000	6	91	24.2689	24.3457	24.1936	24.6168	24.4406	24.2574
	0.702886	-0.360018	AT2G25970.1	AT2G25970.1	316	Color2 [DarkGray]	1	4					-1	6	6	6	14.1	14.1	14.1	64.606	0	52.855	15233000	19	16	20.4105	20.5789	20.8319	19.8572	20.511	20.3731
	0.246345	-0.104157	AT2G27200.1;AT1G08410.1	AT2G27200.1	317	Color2 [DarkGray]	1	4					-1	14	14	14	32	32	32	60.757	0	187.52	91536000	32	47	22.405	21.8475	22.1206	21.9388	22.0955	22.0264
	0.0694402	0.0251764	AT2G27600.1	AT2G27600.1	318	Color2 [DarkGray]	1	4					-1	9	9	9	29.4	29.4	29.4	48.592	0	69.179	30701000	28	32	21.0229	21.3745	21.3983	21.221	21.3051	21.3451
	0.132992	0.401157	AT2G27720.1;AT2G27720.3;AT2G27720.2;AT2G27720.4	AT2G27720.1;AT2G27720.3;AT2G27720.2;AT2G27720.4	320	Color2 [DarkGray]	1	4					-1	5	5	2	52.2	52.2	40	11.452	0	42.714	14502000	5	15	21.1987	19.8684	18.517	18.6699	21.0687	21.0491
	0.28489	0.484346	AT2G27730.4;AT2G27730.3;AT2G27730.2;AT2G27730.1	AT2G27730.4;AT2G27730.3;AT2G27730.2;AT2G27730.1	321	Color2 [DarkGray]	1	4					-1	2	2	2	26.5	26.5	26.5	11.947	0	17.132	7673700	5	10	18.5213	20.5863	20.5186	20.1505	20.4999	20.4288
	0.291671	-0.139568	AT2G28000.1	AT2G28000.1	322	Color2 [DarkGray]	1	4					-1	16	16	16	30	30	30	62.071	0	156.35	46798000	31	57	20.9635	21.3607	21.3762	20.8165	21.2251	21.2401
	0.202173	0.0678113	AT2G29550.1;AT5G23860.2;AT5G23860.1;AT1G75780.1	AT2G29550.1;AT5G23860.2;AT5G23860.1	327	Color2 [DarkGray]	1	4					-1	19	19	5	44.3	44.3	15.1	50.747	0	259.82	196920000	21	75	23.5791	23.1639	23.5154	23.4717	23.4929	23.4973
	0.130353	-0.223121	AT5G35530.1;AT3G53870.1;AT2G31610.1	AT5G35530.1;AT3G53870.1;AT2G31610.1	329	Color2 [DarkGray]	1	4					-1	2	2	2	10.9	10.9	10.9	27.458	0	23.304	6442800	16	12	20.4245	19.265	18.9364	19.8448	18.449	19.6628
	0.110621	-0.0484022	AT2G32600.1	AT2G32600.1	333	Color2 [DarkGray]	1	4					-1	6	6	6	30.7	30.7	30.7	31.369	0	50.138	27633000	13	20	21.8685	21.977	21.7303	21.9808	21.5296	21.9202
	0.0972947	-0.329861	AT2G32730.1	AT2G32730.1	335	Color2 [DarkGray]	1	4					-1	2	2	2	2.7	2.7	2.7	108.98	0	18.479	11364000	38	10	21.161	21.354	18.3586	20.7552	20.6313	18.4975
	2.94729	-0.586568	AT2G35050.2;AT2G35050.1	AT2G35050.2;AT2G35050.1	338	Color2 [DarkGray]	1	4					-1	29	28	27	27.7	27	26.3	139.7	0	323.31	407850000	53	142	23.6413	23.8503	23.6787	23.098	23.1921	23.1206
	0.806574	0.133352	AT2G35230.1;AT2G35230.3;AT2G35230.2	AT2G35230.1;AT2G35230.3	340	Color2 [DarkGray]	1	4					-1	8	8	8	23.1	23.1	23.1	44.686	0	84.892	72568000	16	29	22.9518	22.8774	22.8284	22.9278	23.151	22.9788
	0.0717763	-0.0361697	AT2G35500.1	AT2G35500.1	341	Color2 [DarkGray]	1	4					-1	21	21	21	58.7	58.7	58.7	42.687	0	323.31	297770000	19	93	24.5773	24.0734	24.3523	24.1115	24.4519	24.3312
	0.533322	-0.147003	AT2G36460.1;AT2G36460.3;AT2G36460.2	AT2G36460.1;AT2G36460.3;AT2G36460.2	347	Color2 [DarkGray]	1	4					-1	26	26	13	71.8	71.8	50.3	38.386	0	293.3	383480000	23	134	23.9296	23.5791	23.9172	23.6075	23.739	23.6383
	0.00971811	-0.00239754	AT2G37190.1;AT3G53430.1;AT5G60670.1	AT2G37190.1;AT3G53430.1;AT5G60670.1	349	Color2 [DarkGray]	1	4					-1	6	6	6	39.8	39.8	39.8	17.942	0	69.103	125050000	9	37	23.1715	22.9206	23.0269	23.0821	22.9655	23.0642
	0.056177	-0.137407	AT2G37270.2;AT2G37270.1	AT2G37270.2;AT2G37270.1	351	Color2 [DarkGray]	1	4					-1	4	4	2	26.1	26.1	15.5	22.99	0	30.62	11076000	11	10	19.6508	20.5476	20.9598	20.9076	18.75	21.0884
	1.10315	0.594821	AT3G53750.2;AT3G53750.1;AT2G37620.4;AT2G37620.3;AT2G37620.2;AT2G37620.1	AT3G53750.2;AT3G53750.1;AT2G37620.4;AT2G37620.3;AT2G37620.2;AT2G37620.1	352	Color2 [DarkGray]	1	4					-1	14	3	2	42.2	11.7	9	41.797	0	30.396	37134000	21	15	21.355	22.166	21.7673	22.2149	22.5436	22.3143
	0.844481	0.417027	AT2G38250.1	AT2G38250.1	355	Color2 [DarkGray]	1	4					-1	9	9	9	27.7	27.7	27.7	34.307	0	136.27	128440000	12	52	22.2324	22.3755	22.748	23.1664	22.5771	22.8635
	2.23905	0.242387	AT2G39050.1	AT2G39050.1	358	Color2 [DarkGray]	1	4					-1	16	16	16	40.4	40.4	40.4	35.647	0	245.86	611130000	14	128	24.1492	24.1312	24.2505	24.3901	24.4702	24.3977
	0.280472	-0.138922	AT2G39730.3;AT2G39730.2;AT2G39730.1	AT2G39730.3;AT2G39730.2;AT2G39730.1	360	Color2 [DarkGray]	1	4					-1	7	7	7	25.6	25.6	25.6	48.5	0	79.012	22425000	19	23	20.8937	20.6775	20.9359	21.0616	20.5274	20.5014
	1.03612	-1.94807	AT2G41430.5;AT2G41430.4;AT2G41430.2;AT2G41430.1;AT2G41430.3	AT2G41430.5;AT2G41430.4;AT2G41430.2;AT2G41430.1;AT2G41430.3	367	Color2 [DarkGray]	1	4					-1	3	3	3	18.4	18.4	18.4	18.411	0	32.979	12832000	4	12	21.1798	21.0421	20.6498	20.6964	17.8072	18.5239
	0.885756	2.19705	AT2G41840.1	AT2G41840.1	368	Color2 [DarkGray]	1	4					-1	4	4	2	19.3	19.3	9.8	30.878	0	39.733	26862000	16	13	18.4729	19.2371	22.2516	22.2723	22.0405	22.24
	0.0572425	0.0294196	AT2G42520.3;AT2G42520.2;AT2G42520.1;AT5G14610.4;AT5G14610.7;AT5G14610.3;AT3G01540.1;AT3G01540.4;AT3G01540.3;AT3G01540.2;AT5G14610.6;AT5G14610.2;AT5G14610.5;AT5G14610.1;AT3G06480.2;AT3G06480.1	AT2G42520.3;AT2G42520.2;AT2G42520.1	371	Color2 [DarkGray]	1	4					-1	32	32	17	47.4	47.4	31	67.625	0	323.31	2051600000	34	207	26.5259	26.1171	26.3353	26.4736	26.0906	26.5024
	0.341693	-1.47012	AT2G42610.2;AT2G42610.1;AT1G16910.1;AT5G58500.1;AT5G28490.1;AT4G18610.1;AT3G23290.2;AT1G78815.1;AT1G07090.1;AT3G04510.1;AT2G31160.1	AT2G42610.2;AT2G42610.1	373	Color2 [DarkGray]	1	4					-1	3	3	3	25.4	25.4	25.4	19.791	0	30.847	26360000	9	9	22.1937	19.1404	21.8546	18.4555	22.5565	17.7664
	0.0697767	-0.0932026	AT2G42810.5;AT2G42810.4;AT2G42810.1;AT2G42810.3;AT2G42810.2	AT2G42810.5;AT2G42810.4;AT2G42810.1;AT2G42810.3;AT2G42810.2	376	Color2 [DarkGray]	1	4					-1	6	6	6	15.9	15.9	15.9	54.702	0	46.367	8593300	27	16	19.7867	19.1089	19.8576	18.6909	19.9498	19.8329
	0.263379	-0.763648	AT2G43090.1;AT2G43090.2	AT2G43090.1;AT2G43090.2	378	Color2 [DarkGray]	1	4					-1	4	4	4	19.5	19.5	19.5	26.79	0	32.124	11305000	16	11	20.9818	18.5899	20.7921	18.6229	18.3674	21.0825
	0.0609153	0.0274645	AT2G43140.1	AT2G43140.1	379	Color2 [DarkGray]	1	4					-1	17	2	2	64.2	13.2	13.2	23.387	0	65.443	17810000	11	12	21.0362	21.3907	21.1999	21.3876	21.0035	21.3182
	0.0315754	0.0112406	AT2G43140.2;AT2G42280.1;AT2G42280.3	AT2G43140.2	380	Color2 [DarkGray]	1	4					-1	21	21	6	72.2	72.2	37.2	33.803	0	323.31	1137400000	14	171	25.9357	25.6661	25.8627	25.8789	25.9585	25.6608
	0.0104955	0.00797208	AT2G44060.2;AT2G44060.1	AT2G44060.2;AT2G44060.1	383	Color2 [DarkGray]	1	4					-1	7	7	7	33.5	33.5	33.5	36.036	0	71.143	67546000	23	25	22.7721	23.2908	23.27	23.4203	22.7848	23.1517
	0.203081	0.0592906	AT2G44120.1;AT2G44120.2	AT2G44120.1;AT2G44120.2	384	Color2 [DarkGray]	1	4					-1	4	4	2	9.5	9.5	9.1	27.939	0	28.76	40060000	14	20	22.3111	21.9796	22.2597	22.1946	22.334	22.1997
	0.142527	-0.411076	AT2G44350.4;AT2G44350.1;AT2G44350.3;AT2G44350.2	AT2G44350.4;AT2G44350.1;AT2G44350.3;AT2G44350.2	385	Color2 [DarkGray]	1	4					-1	4	4	4	9.9	9.9	9.9	52.654	0	30.627	11180000	23	11	20.41	18.8399	20.9026	17.9026	20.5919	20.4247
	1.66681	-2.9675	AT2G44620.1	AT2G44620.1	386	Color2 [DarkGray]	1	4					-1	1	1	1	9.8	9.8	9.8	13.717	0	25.252	14664000	5	8	20.702	22.926	20.8126	17.8157	19.0469	18.6756
	0.210395	0.6464	AT2G44650.1	AT2G44650.1	387	Color2 [DarkGray]	1	4					-1	3	3	2	30.2	30.2	23.7	15.049	0	22.592	8252900	8	9	18.1237	17.9382	20.6599	20.2196	20.4887	17.9526
	0.421029	-0.308207	AT2G45290.2;AT2G45290.1	AT2G45290.2;AT2G45290.1	389	Color2 [DarkGray]	1	4					-1	7	7	5	11.5	11.5	10	79.921	0	51.029	16668000	33	24	20.0943	19.8709	20.4025	19.2796	20.1621	20.0014
	0.0469035	0.041942	AT2G45620.1	AT2G45620.1	390	Color2 [DarkGray]	1	4					-1	5	5	5	10.7	10.7	10.7	85.763	0	37.21	8525100	34	15	19.1678	20.1	20.0085	19.9007	19.8485	19.653
	0.0588256	-0.0132929	AT2G46020.6;AT2G46020.5;AT2G46020.1;AT2G46020.4;AT2G46020.3;AT2G46020.2	AT2G46020.6;AT2G46020.5;AT2G46020.1;AT2G46020.4;AT2G46020.3;AT2G46020.2	393	Color2 [DarkGray]	1	4					-1	27	27	27	20.3	20.3	20.3	245.44	0	251.84	98461000	106	102	21.6196	21.7146	21.8695	21.7767	21.7057	21.6814
	0.1574	0.267257	AT3G01280.1	AT3G01280.1	401	Color2 [DarkGray]	1	4					-1	6	4	4	25	20.3	20.3	29.425	0	28.428	9319300	14	12	18.3908	20.0916	20.3991	19.706	20.1205	19.8568
	0.0241872	0.133034	AT5G16070.1;AT3G02530.1	AT5G16070.1;AT3G02530.1	408	Color2 [DarkGray]	1	4					-1	6	6	6	15.1	15.1	15.1	58.927	0	61.108	27319000	29	13	22.1542	22.2298	18.2252	22.2574	22.3064	18.4446
	0.155139	-0.0852661	AT3G03960.1	AT3G03960.1	412	Color2 [DarkGray]	1	4					-1	8	8	8	26.2	26.2	26.2	58.939	0	77.508	28679000	32	30	21.5868	21.2375	21.5889	21.2133	21.2199	21.7242
	0.418185	-0.198042	AT3G04120.1	AT3G04120.1	413	Color2 [DarkGray]	1	4					-1	30	30	4	74	74	13.6	36.914	0	323.31	839680000	21	156	25.9034	25.2637	25.7717	25.3502	25.5248	25.4698
	0.0838702	0.0358092	AT3G04840.1	AT3G04840.1	416	Color2 [DarkGray]	1	4					-1	7	7	4	29.4	29.4	19.1	29.85	0	73.937	73183000	15	23	23.1073	23.0218	22.8791	22.7974	23.0513	23.267
	0.453458	0.456096	AT3G04920.2;AT3G04920.1	AT3G04920.2;AT3G04920.1	418	Color2 [DarkGray]	1	4					-1	4	4	2	42.9	42.9	25.9	12.909	0	28.971	9800800	5	14	19.8556	18.569	19.8807	19.9161	19.8638	19.8937
	0.0742629	-0.0387516	AT3G05530.1;AT1G09100.1;AT1G45000.2;AT4G27680.1;AT1G45000.1;AT5G53540.1	AT3G05530.1;AT1G09100.1	420	Color2 [DarkGray]	1	4					-1	11	11	10	37	37	37	47.48	0	108.95	44788000	25	36	21.3685	20.9792	21.2844	20.9798	21.0919	21.4443
	0.50228	-1.04629	AT3G06050.1;AT3G06050.2	AT3G06050.1	422	Color2 [DarkGray]	1	4					-1	6	6	6	40.3	40.3	40.3	21.445	0	65.647	32851000	12	21	21.7286	21.9928	21.5966	21.8281	21.415	18.936
	0.297678	0.793704	AT3G06650.2;AT3G06650.1	AT3G06650.2;AT3G06650.1	424	Color2 [DarkGray]	1	4					-1	3	3	2	9.9	9.9	8.1	65.813	0	54.773	25122000	32	16	18.6137	22.0449	21.3391	20.9209	21.8329	21.625
	0.33261	0.124282	AT3G07220.1	AT3G07220.1	429	Color2 [DarkGray]	1	4					-1	6	6	6	27.2	27.2	27.2	35.993	0	122.18	47048000	20	25	23.1067	22.7837	22.8035	23.046	22.8156	23.2052
	0.121425	0.0471102	AT3G07660.1	AT3G07660.1	432	Color2 [DarkGray]	1	4					-1	51	51	51	50.1	50.1	50.1	90.075	0	323.31	11370000000	32	518	28.2943	28.526	28.3229	28.6652	28.3551	28.2642
	0.674803	-1.13936	AT3G07770.3;AT3G07770.2;AT3G07770.1	AT3G07770.3;AT3G07770.2;AT3G07770.1	433	Color2 [DarkGray]	1	4					-1	6	6	6	13.6	13.6	13.6	90.566	0	55.324	9593400	47	15	20.3189	19.1997	20.4579	18.2867	20.1592	18.1126
	2.79717	1.12162	AT3G08530.1;AT3G11130.1	AT3G08530.1;AT3G11130.1	435	Color2 [DarkGray]	1	4					-1	18	18	18	12	12	12	193.27	0	135.2	63308000	88	54	21.1032	21.6091	21.4042	22.4742	22.4999	22.5074
	0.399645	-0.325696	AT3G08580.2;AT3G08580.1	AT3G08580.2;AT3G08580.1	436	Color2 [DarkGray]	1	4					-1	6	3	3	17.8	11.5	11.5	41.475	0	52.789	45596000	22	21	22.6517	23.0254	22.0439	21.8637	22.465	22.4152
	1.91335	1.63574	AT3G08943.1	AT3G08943.1	438	Color2 [DarkGray]	1	4					-1	2	2	2	3.1	3.1	3.1	94.127	0	26.067	6300200	34	9	18.7761	18.5386	19.0874	19.9238	20.3024	21.0831
	0.150128	0.0508626	AT3G09200.1;AT3G09200.2;AT3G11250.1;AT2G40010.1	AT3G09200.1;AT3G09200.2;AT3G11250.1;AT2G40010.1	439	Color2 [DarkGray]	1	4					-1	11	11	11	44.4	44.4	44.4	34.133	0	113.56	81413000	9	42	22.4494	22.4927	22.1332	22.3594	22.5207	22.3478
	0.0282046	0.00436083	AT3G09440.4;AT3G09440.3;AT3G09440.2;AT3G09440.1	AT3G09440.4;AT3G09440.3;AT3G09440.2;AT3G09440.1	441	Color2 [DarkGray]	1	4					-1	45	17	15	51.3	22.3	16.6	71.147	0	279.38	320060000	37	97	23.8368	23.8401	23.801	23.7349	23.85	23.9062
	0.27896	-0.0551364	AT3G09630.1;AT3G09630.2	AT3G09630.1;AT3G09630.2	442	Color2 [DarkGray]	1	4					-1	11	11	9	21.9	21.9	15.5	44.702	0	141.78	60307000	19	41	22.6986	22.801	22.5684	22.6787	22.5497	22.6742
	0.913172	0.878953	AT5G02960.1;AT3G09680.1	AT5G02960.1;AT3G09680.1	443	Color2 [DarkGray]	1	4					-1	4	4	4	27.5	27.5	27.5	15.735	0	26.765	12610000	6	15	19.0556	20.1176	20.5265	20.9615	20.7541	20.621
	0.893059	-0.395693	AT3G09820.2;AT3G09820.1;AT5G03300.3;AT5G03300.2;AT5G03300.1	AT3G09820.2;AT3G09820.1;AT5G03300.3;AT5G03300.2;AT5G03300.1	444	Color2 [DarkGray]	1	4					-1	4	4	4	21.9	21.9	21.9	33.326	0	53.743	30256000	17	19	22.1843	21.5615	21.7814	21.2864	21.6216	21.4321
	0.291786	-0.0894903	AT3G09840.1;AT3G53230.1	AT3G09840.1;AT3G53230.1	445	Color2 [DarkGray]	1	4					-1	53	53	14	52	52	20.6	89.392	0	323.31	691050000	43	278	23.739	23.5815	23.7823	23.3956	23.7096	23.7292
	0.600494	0.8026	AT3G10070.1	AT3G10070.1	446	Color2 [DarkGray]	1	4					-1	4	4	4	9.6	9.6	9.6	57.709	0	24.098	6384400	23	12	19.5763	18.0239	18.1911	19.9234	18.7606	19.5152
	1.38181	0.735827	AT3G10090.1;AT5G03850.1;AT5G64140.1	AT3G10090.1;AT5G03850.1	448	Color2 [DarkGray]	1	4					-1	6	6	6	65.6	65.6	65.6	7.3705	0	44.443	17213000	2	16	20.3248	20.4835	20.4484	21.4097	20.6673	21.3872
	0.255985	-0.0738176	AT3G11510.1	AT3G11510.1	457	Color2 [DarkGray]	1	4					-1	6	6	1	41.3	41.3	7.3	16.273	0	46.978	50947000	6	27	22.6108	22.3755	22.527	22.2489	22.5424	22.5005
	1.56225	-0.326653	AT3G11710.1	AT3G11710.1	458	Color2 [DarkGray]	1	4					-1	7	7	7	18.1	18.1	18.1	70.887	0	104.46	22123000	33	20	21.3209	21.146	21.2474	20.7495	20.9723	21.0124
	0.303037	-0.48048	AT3G11830.1;AT3G11830.2	AT3G11830.1;AT3G11830.2	460	Color2 [DarkGray]	1	4					-1	4	4	4	8.1	8.1	8.1	59.776	0	29.338	7570100	33	13	20.1598	19.0593	20.2384	18.3403	19.5812	20.0946
	0.00381456	-0.00164795	AT3G12580.1	AT3G12580.1	466	Color2 [DarkGray]	1	4					-1	33	6	5	41.8	10.8	8.6	71.101	0	68.321	85244000	37	32	22.7361	22.4407	22.7058	22.7695	22.6884	22.4197
	1.19768	-1.38774	AT3G12780.1	AT3G12780.1	467	Color2 [DarkGray]	1	4					-1	6	5	3	19.8	16.2	10.2	50.111	0	36.257	10246000	33	15	20.1851	19.9572	20.1903	18.2602	18.1111	19.798
	0.876539	-0.400076	AT3G13224.2;AT3G13224.1;AT3G13224.3	AT3G13224.2;AT3G13224.1;AT3G13224.3	470	Color2 [DarkGray]	1	4					-1	11	11	11	41.9	41.9	41.9	37.864	0	130.64	53097000	20	44	21.7352	21.7869	22.0076	21.4345	21.1092	21.7859
	1.38215	0.289852	AT3G13300.1;AT3G13300.2;AT3G13300.3	AT3G13300.1;AT3G13300.2;AT3G13300.3	471	Color2 [DarkGray]	1	4					-1	15	15	10	14.4	14.4	10.5	145.72	0	107.15	22734000	72	46	19.7552	20.0262	19.9687	20.2423	20.2747	20.1028
	0.594994	0.171879	AT3G13460.1;AT3G13460.3;AT3G13460.2;AT3G13460.4;AT1G55500.1;AT1G55500.6;AT1G55500.3;AT1G55500.4;AT1G55500.2;AT1G55500.5	AT3G13460.1;AT3G13460.3;AT3G13460.2;AT3G13460.4	472	Color2 [DarkGray]	1	4					-1	8	8	7	19.2	19.2	17.2	72.474	0	76.425	22034000	28	26	20.6435	20.6877	20.4946	20.8637	20.5528	20.925
	1.58988	-0.28644	AT3G13470.1	AT3G13470.1	473	Color2 [DarkGray]	1	4					-1	22	22	5	49.5	49.5	14.6	63.341	0	216.65	77614000	34	77	21.5637	21.814	21.7374	21.482	21.3545	21.4193
	0.860208	-0.249645	AT3G13930.1	AT3G13930.1	475	Color2 [DarkGray]	1	4					-1	5	5	5	11.9	11.9	11.9	58.467	0	40.73	16348000	32	22	20.4803	20.4021	20.5716	20.0004	20.2739	20.4307
	0.235945	-0.0938396	AT3G15000.1;AT1G53260.2;AT1G53260.1	AT3G15000.1	480	Color2 [DarkGray]	1	4					-1	5	5	5	13.9	13.9	13.9	42.869	0	33.533	15970000	19	23	20.2822	20.089	20.5206	20.0163	20.3168	20.2771
	0.369371	0.803962	AT3G15660.2;AT3G15660.1	AT3G15660.2;AT3G15660.1	481	Color2 [DarkGray]	1	4					-1	3	3	3	20.7	20.7	20.7	18.734	0	31.772	18935000	13	13	21.1306	18.4432	21.2063	21.0981	20.9468	21.1471
	0.959053	0.230414	AT3G15690.2;AT3G15690.1;AT3G15690.3	AT3G15690.2;AT3G15690.1;AT3G15690.3	482	Color2 [DarkGray]	1	4					-1	8	7	7	23.6	19.8	19.8	28.169	0	142.18	2373200000	10	55	28.5048	28.5352	28.4777	28.8297	28.8645	28.5147
	0.189985	0.38571	AT3G16640.1	AT3G16640.1	483	Color2 [DarkGray]	1	4					-1	2	2	2	16.7	16.7	16.7	18.91	0	17.325	8013000	9	7	19.6329	18.868	19.766	20.7434	20.2997	18.3809
	0.135766	0.047013	AT3G17390.1	AT3G17390.1	488	Color2 [DarkGray]	1	4					-1	11	11	4	41.5	41.5	22.9	42.795	0	125.84	214510000	20	74	23.1697	22.9193	23.3169	23.0789	23.2107	23.2574
	1.02972	-0.399085	AT3G17820.1	AT3G17820.1	489	Color2 [DarkGray]	1	4					-1	5	5	3	24.6	24.6	17.2	38.594	0	121.74	20234000	15	15	22.071	21.5748	21.6798	21.209	21.5598	21.3596
	0.142234	-0.108324	AT3G18190.1	AT3G18190.1	492	Color2 [DarkGray]	1	4					-1	8	8	8	16.8	16.8	16.8	57.775	0	56.29	21035000	33	24	21.2567	20.3578	21.0023	20.855	20.8532	20.5836
	0.736057	-0.162635	AT3G19130.1	AT3G19130.1	495	Color2 [DarkGray]	1	4					-1	21	12	12	41.4	31.5	31.5	48.118	0	323.31	580410000	14	97	24.9112	25.1104	24.7889	24.7115	24.844	24.7671
	0.545475	-1.38847	AT3G22270.1	AT3G22270.1	502	Color2 [DarkGray]	1	4					-1	7	7	7	17.5	17.5	17.5	85.645	0	125.62	27443000	38	20	21.5729	21.7704	21.9899	21.8061	21.1807	18.1809
	0.723779	0.79669	AT3G22310.1;AT3G22310.2	AT3G22310.1;AT3G22310.2	503	Color2 [DarkGray]	1	4					-1	10	6	6	21.3	14.6	14.6	63.609	0	55.105	15242000	29	23	18.6327	19.8959	20.2104	20.356	20.6387	20.1343
	0.0532647	0.0280571	AT3G22330.1	AT3G22330.1	504	Color2 [DarkGray]	1	4					-1	15	15	11	30.8	30.8	24.2	65.359	0	117.99	72239000	38	61	21.7679	21.9507	22.07	22.0787	21.6429	22.1512
	1.06841	-0.305823	AT3G22520.1	AT3G22520.1	507	Color2 [DarkGray]	1	4					-1	13	13	13	30.5	30.5	30.5	67.57	0	115.97	49760000	28	36	21.71	22.0908	21.9768	21.4847	21.7362	21.6393
	1.00355	0.62505	AT3G22890.1	AT3G22890.1	510	Color2 [DarkGray]	1	4					-1	6	4	3	20.3	16	11.4	51.458	0	27.314	6377200	27	13	18.8795	18.6992	19.6442	19.6418	19.772	19.6843
	1.04193	3.36534	AT3G23325.1;AT4G14342.1;AT4G14342.2	AT3G23325.1;AT4G14342.1;AT4G14342.2	511	Color2 [DarkGray]	1	4					-1	3	3	3	66.7	66.7	66.7	10.177	0	63.699	54506000	5	14	19.5816	18.6796	23.6052	23.8667	23.9179	24.1779
	0.291367	0.441666	AT3G23990.1	AT3G23990.1	514	Color2 [DarkGray]	1	4					-1	9	9	3	19.4	19.4	7.6	61.28	0	55.571	12970000	35	23	18.4131	20.0858	20.3828	20.0935	20.0705	20.0426
	0.262149	-0.135895	AT3G25230.1;AT3G25230.2	AT3G25230.1;AT3G25230.2	516	Color2 [DarkGray]	1	4					-1	7	7	7	16.7	16.7	16.7	61.452	0	53.741	23365000	25	22	21.027	20.526	21.1057	20.8606	20.5531	20.8374
	0.551574	-0.140977	AT3G25860.1	AT3G25860.1	519	Color2 [DarkGray]	1	4					-1	5	5	5	23.3	23.3	23.3	50.08	0	48.757	47743000	23	26	21.679	21.8235	21.9526	21.8246	21.5453	21.6622
	0.350968	0.494644	AT3G26420.1	AT3G26420.1	521	Color2 [DarkGray]	1	4					-1	2	2	2	12.2	12.2	12.2	26.923	0	14.97	6079000	9	10	20.2618	18.927	18.3263	19.4954	19.5948	19.9089
	1.15698	0.230335	AT3G26990.1;AT3G26990.2;AT5G65180.1	AT3G26990.1;AT3G26990.2	522	Color2 [DarkGray]	1	4					-1	39	39	39	49.3	49.3	49.3	56.461	0	323.31	1401500000	24	210	25.8771	25.7517	25.8295	26.1747	26.0902	25.8844
	1.58325	-0.452307	AT3G27460.2;AT3G27460.1;AT3G27460.4;AT3G27460.3;AT3G27460.5	AT3G27460.2;AT3G27460.1;AT3G27460.4;AT3G27460.3;AT3G27460.5	525	Color2 [DarkGray]	1	4					-1	14	14	7	63.9	63.9	35.3	30.37	0	130.17	63022000	18	51	22.2547	21.8549	21.9885	21.4818	21.6837	21.5758
	0.945803	-1.55662	AT3G27850.1;AT3G27830.2;AT3G27830.1	AT3G27850.1;AT3G27830.2;AT3G27830.1	527	Color2 [DarkGray]	1	4					-1	4	4	4	17.6	17.6	17.6	19.682	0	37.898	10108000	11	12	20.8468	20.3914	20.8027	20.6175	18.1717	18.582
	0.288948	0.265734	AT3G43300.2;AT3G43300.3;AT3G43300.1	AT3G43300.2;AT3G43300.3;AT3G43300.1	532	Color2 [DarkGray]	1	4					-1	4	4	4	2.7	2.7	2.7	191.45	0	27.701	4262400	103	8	18.7173	18.927	19.8948	19.3012	19.5826	19.4526
	0.413566	-0.162303	AT3G44110.2;AT3G44110.1	AT3G44110.2;AT3G44110.1	533	Color2 [DarkGray]	1	4					-1	11	11	6	44.3	44.3	31.5	37.674	0	109.74	76630000	16	51	22.1499	21.6702	21.9496	21.718	21.627	21.9377
	0.550303	0.123419	AT5G62300.2;AT5G62300.1;AT3G45030.1	AT5G62300.2;AT5G62300.1;AT3G45030.1	536	Color2 [DarkGray]	1	4					-1	4	2	2	30.6	20.2	20.2	13.878	0	15.91	22767000	6	19	21.3779	21.5801	21.5825	21.6667	21.7449	21.4991
	0.320995	0.0458495	AT3G47370.3;AT3G47370.2;AT3G47370.1	AT3G47370.3;AT3G47370.2;AT3G47370.1	542	Color2 [DarkGray]	1	4					-1	5	5	3	29.5	29.5	18.9	13.693	0	33.839	25702000	6	20	21.0219	21.0917	20.9925	21.1647	20.9897	21.0892
	0.053034	-0.115248	AT3G47610.1	AT3G47610.1	544	Color2 [DarkGray]	1	4					-1	5	5	5	18.6	18.6	18.6	44.56	0	35.09	7798500	25	13	19.9976	18.2563	20.133	19.7522	18.4654	19.8234
	0.626014	0.225034	AT3G48330.2;AT3G48330.1;AT3G48330.4;AT3G48330.3	AT3G48330.2;AT3G48330.1;AT3G48330.4;AT3G48330.3	547	Color2 [DarkGray]	1	4					-1	6	6	6	39.1	39.1	39.1	24.614	0	88.969	77796000	12	21	23.3711	23.0603	23.2981	23.4959	23.2273	23.6813
	0.679688	-0.481446	AT3G48870.2;AT3G48870.4;AT3G48870.3;AT3G48870.1;AT2G25140.1	AT3G48870.2;AT3G48870.4;AT3G48870.3;AT3G48870.1	550	Color2 [DarkGray]	1	4					-1	16	16	5	27.1	27.1	10.2	102.24	0	119.48	51588000	46	42	21.8229	21.766	22.2163	20.9247	21.516	21.9203
	0.0785442	0.00563812	AT3G49010.7;AT3G49010.6;AT3G49010.3;AT3G49010.2;AT3G49010.1;AT3G49010.4;AT3G49010.5;AT5G23900.1;AT3G48960.1	AT3G49010.7;AT3G49010.6;AT3G49010.3;AT3G49010.2;AT3G49010.1;AT3G49010.4	552	Color2 [DarkGray]	1	4					-1	9	9	9	42.2	42.2	42.2	23.767	0	61.105	18731000	10	25	20.6896	20.6865	20.6268	20.6454	20.6964	20.6779
	0.154267	0.432973	AT3G49240.1	AT3G49240.1	553	Color2 [DarkGray]	1	4					-1	7	7	7	17.6	17.6	17.6	71.292	0	53.391	9654100	37	14	18.8295	18.5865	20.9288	20.7983	18.4161	20.4293
	0.743651	0.157189	AT3G50370.2;AT3G50370.1	AT3G50370.2;AT3G50370.1	555	Color2 [DarkGray]	1	4					-1	96	96	96	42.7	42.7	42.7	236.76	0	323.31	2149500000	95	569	25.5208	25.5321	25.5377	25.8738	25.6398	25.5485
	0.177906	-0.0658919	AT3G51800.3;AT3G51800.1;AT3G51800.2	AT3G51800.3;AT3G51800.1;AT3G51800.2	559	Color2 [DarkGray]	1	4					-1	11	11	11	20.8	20.8	20.8	42.295	0	89.602	34466000	21	35	21.3857	20.9847	21.2788	21.185	21.2572	21.0093
	0.643407	0.194121	AT3G52140.1;AT3G52140.2;AT3G52140.4;AT3G52140.3	AT3G52140.1;AT3G52140.2;AT3G52140.4;AT3G52140.3	562	Color2 [DarkGray]	1	4					-1	7	7	7	8.4	8.4	8.4	153.26	0	83.555	37686000	62	30	21.6718	21.4591	21.7285	21.8734	21.6029	21.9655
	1.94376	-0.469276	AT3G52300.1;AT3G52300.2	AT3G52300.1;AT3G52300.2	565	Color2 [DarkGray]	1	4					-1	4	4	4	24.4	24.4	24.4	19.586	0	65.938	24968000	10	17	21.5623	21.7598	21.4577	21.0083	21.1756	21.188
	0.0179047	0.00927226	AT3G52930.1;AT5G03690.2;AT4G26530.3;AT4G26530.2;AT4G26530.1;AT5G03690.1;AT5G03690.4;AT5G03690.3	AT3G52930.1	570	Color2 [DarkGray]	1	4					-1	22	10	10	64.2	40.8	40.8	38.539	0	119	140380000	23	55	23.5759	23.4633	23.8762	23.5582	23.8855	23.4995
	0.294875	-0.157798	AT3G52960.1	AT3G52960.1	571	Color2 [DarkGray]	1	4					-1	9	9	9	35.9	35.9	35.9	24.684	0	148.27	38228000	16	35	21.5499	20.8928	21.4837	21.2103	21.2084	21.0345
	0.127333	-0.0525163	AT3G53020.1;AT2G36620.1	AT3G53020.1;AT2G36620.1	572	Color2 [DarkGray]	1	4					-1	6	6	6	20.9	20.9	20.9	18.632	0	53.715	161520000	5	32	23.9384	23.7284	23.621	23.8041	23.4736	23.8525
	0.500942	0.507107	AT3G53460.3;AT3G53460.2;AT3G53460.1;AT3G53460.4	AT3G53460.3;AT3G53460.2;AT3G53460.1;AT3G53460.4	573	Color2 [DarkGray]	1	4					-1	3	3	2	10.8	10.8	8.2	36.007	0	25.348	5878800	20	12	18.8669	19.9799	18.5265	19.5213	19.6871	19.6863
	0.366574	0.305014	AT3G54610.1	AT3G54610.1	581	Color2 [DarkGray]	1	4					-1	10	10	10	28	28	28	63.123	0	156.08	56884000	27	51	21.3794	22.5119	22.2503	22.2858	22.4743	22.2965
	0.55867	0.946553	AT3G55220.1;AT3G55200.3;AT3G55200.2;AT3G55200.1	AT3G55220.1;AT3G55200.3;AT3G55200.2;AT3G55200.1	584	Color2 [DarkGray]	1	4					-1	10	10	10	9.6	9.6	9.6	134.97	0	66.537	23838000	52	26	20.9285	18.8237	21.1946	21.2478	21.3512	21.1874
	0.42924	0.716761	AT3G55410.2;AT3G55410.1	AT3G55410.2;AT3G55410.1	585	Color2 [DarkGray]	1	4					-1	5	5	4	6	6	6	115.16	0	32.029	11020000	48	17	20.0663	17.9143	20.019	20.0556	19.9114	20.1829
	0.0255103	-0.0216993	AT3G55440.1	AT3G55440.1	586	Color2 [DarkGray]	1	4					-1	5	5	4	33.1	33.1	29.9	27.169	0	94.85	78925000	14	24	22.5544	22.518	23.2932	22.6204	23.0301	22.65
	0.0284154	0.0497011	AT3G56070.2;AT3G56070.1	AT3G56070.2;AT3G56070.1	589	Color2 [DarkGray]	1	4					-1	3	3	3	13.6	13.6	13.6	18.92	0	18.887	7334400	11	10	20.152	20.1877	18.7127	19.8976	20.2068	19.0971
	0.693502	-0.301392	AT3G56130.1;AT3G56130.4;AT3G56130.2;AT3G56130.5;AT3G56130.3	AT3G56130.1;AT3G56130.4;AT3G56130.2;AT3G56130.5;AT3G56130.3	590	Color2 [DarkGray]	1	4					-1	16	16	16	63.7	63.7	63.7	29.576	0	323.31	10424000000	8	321	28.6611	28.5055	28.0286	28.201	28.0161	28.0739
	0.288854	0.80335	AT3G56240.2;AT3G56240.3;AT3G56240.1	AT3G56240.2;AT3G56240.3;AT3G56240.1	592	Color2 [DarkGray]	1	4					-1	2	2	2	26.1	26.1	26.1	11.943	0	13.65	8451100	6	8	18.7187	18.1963	20.9684	20.7909	18.6292	20.8733
	0.11797	-0.0554123	AT3G57150.1	AT3G57150.1	594	Color2 [DarkGray]	1	4					-1	13	13	13	28.5	28.5	28.5	63.026	0	170.75	61125000	32	48	21.9539	22.4561	22.2778	22.3439	22.0539	22.1238
	1.75881	-0.544171	AT3G58510.3;AT3G58510.2;AT3G58510.1	AT3G58510.3;AT3G58510.2;AT3G58510.1	600	Color2 [DarkGray]	1	4					-1	16	6	5	27.6	16.7	14.2	66.025	0	113.63	58790000	30	33	22.1415	22.3828	22.0106	21.8051	21.5243	21.573
	0.139057	0.330398	AT3G58610.3;AT3G58610.2;AT3G58610.1	AT3G58610.3;AT3G58610.2;AT3G58610.1	602	Color2 [DarkGray]	1	4					-1	5	5	5	12.9	12.9	12.9	63.812	0	52.983	17922000	27	16	21.0691	18.7649	21.5212	20.3872	21.0992	20.8598
	0.291542	0.861521	AT3G58990.1	AT3G58990.1	603	Color2 [DarkGray]	1	4					-1	2	2	2	8.7	8.7	8.7	27.208	0	19.184	21931000	18	10	21.7726	18.5466	22.31	21.841	21.3154	22.0574
	0.58085	0.0795326	AT3G60240.3	AT3G60240.3	609	Color2 [DarkGray]	1	4					-1	72	72	0	43.8	43.8	0	187.72	0	323.31	1200200000	91	375	24.1352	24.1771	24.157	24.278	24.312	24.1179
	0.246299	-0.106653	AT3G60750.2;AT3G60750.1	AT3G60750.2;AT3G60750.1	612	Color2 [DarkGray]	1	4					-1	7	5	5	10.3	8.8	8.8	79.838	0	32.159	17441000	33	18	20.8201	20.5029	20.5968	20.3205	20.8054	20.474
	0.496015	0.705865	AT4G00100.1;AT3G60770.1	AT4G00100.1;AT3G60770.1	613	Color2 [DarkGray]	1	4					-1	3	3	3	17.2	17.2	17.2	17.085	0	17.355	7537300	8	9	19.302	19.3734	20.5507	20.9188	20.9187	19.5061
	0.00213836	-0.00074323	AT3G60830.1	AT3G60830.1	614	Color2 [DarkGray]	1	4					-1	7	7	7	23.1	23.1	23.1	39.904	0	56.824	38464000	19	28	22.0122	21.7143	21.779	21.8655	21.7032	21.9345
	1.64345	-0.512007	AT3G61240.2;AT3G61240.1	AT3G61240.2;AT3G61240.1	616	Color2 [DarkGray]	1	4					-1	3	3	2	15.7	15.7	10.6	56.774	0	36.074	35764000	26	13	22.6923	23.0004	22.7341	22.1931	22.1919	22.5057
	0.199466	0.110486	AT3G62310.3;AT3G62310.2;AT3G62310.1;AT2G47250.1	AT3G62310.3;AT3G62310.2;AT3G62310.1	620	Color2 [DarkGray]	1	4					-1	3	3	3	8.4	8.4	8.4	60.83	0	23.073	9178100	30	15	19.6258	20.2585	19.6354	19.8841	19.9421	20.025
	0.747564	0.43636	AT3G62530.1	AT3G62530.1	621	Color2 [DarkGray]	1	4					-1	9	9	9	33.9	33.9	33.9	24.503	0	86.915	47807000	14	42	20.5272	21.1252	21.4021	21.3838	21.3814	21.5983
	1.91152	-0.166228	AT3G63460.3;AT3G63460.2;AT3G63460.1	AT3G63460.3;AT3G63460.2;AT3G63460.1	623	Color2 [DarkGray]	1	4					-1	6	6	6	7.4	7.4	7.4	118.72	0	50.978	21138000	47	16	21.1468	21.0692	21.1104	20.9781	20.8807	20.969
	0.12187	0.0286382	AT4G01290.2;AT4G01290.1	AT4G01290.2;AT4G01290.1	626	Color2 [DarkGray]	1	4					-1	36	36	36	52.2	52.2	52.2	108.49	0	323.31	196060000	52	142	22.4761	22.2559	22.4092	22.2985	22.4508	22.4779
	0.125964	-0.0739988	AT4G02930.1	AT4G02930.1	632	Color2 [DarkGray]	1	4					-1	12	12	12	34.6	34.6	34.6	49.409	0	100.89	37547000	30	38	20.972	20.9827	21.1836	20.6118	21.3176	20.987
	0.106137	0.0490487	AT4G03250.1	AT4G03250.1	634	Color2 [DarkGray]	1	4					-1	14	14	14	32.1	32.1	32.1	56.823	0	103.02	70412000	25	53	21.4028	21.8552	21.7031	21.7892	21.8168	21.5023
	1.57474	-0.70112	AT4G05150.1	AT4G05150.1	637	Color2 [DarkGray]	1	4					-1	7	7	7	16.6	16.6	16.6	53.062	0	45.761	12931000	20	19	20.0985	20.6364	20.7393	19.8433	19.8351	19.6924
	0.383129	0.612153	AT4G08390.3;AT4G08390.5;AT4G08390.2;AT4G08390.1;AT4G08390.4	AT4G08390.3;AT4G08390.5;AT4G08390.2;AT4G08390.1;AT4G08390.4	639	Color2 [DarkGray]	1	4					-1	3	3	3	13.5	13.5	13.5	40.279	0	19.868	10017000	22	12	20.3361	18.3288	20.3201	20.107	20.3964	20.3182
	0.199652	-0.060763	AT4G08580.1;AT4G08580.2;AT5G17900.1	AT4G08580.1;AT4G08580.2;AT5G17900.1	640	Color2 [DarkGray]	1	4					-1	9	9	9	26.7	26.7	26.7	51.171	0	88.303	34253000	15	31	21.597	21.3176	21.6837	21.5046	21.3941	21.5174
	0.503082	0.979014	AT4G09000.1;AT4G09000.2	AT4G09000.1;AT4G09000.2	641	Color2 [DarkGray]	1	4					-1	7	3	2	27.7	15	10.9	29.931	0	24.752	21624000	18	13	18.7925	21.1495	21.4741	21.3654	21.6502	21.3375
	0.14824	0.111265	AT4G11420.1	AT4G11420.1	645	Color2 [DarkGray]	1	4					-1	7	7	7	9.1	9.1	9.1	114.3	0	44.151	13411000	51	23	19.9431	19.7348	20.1862	20.5544	19.7565	19.887
	0.271068	0.549301	AT4G11600.1	AT4G11600.1	646	Color2 [DarkGray]	1	4					-1	2	2	2	11.2	11.2	11.2	25.584	0	16.459	14375000	12	11	21.1205	18.6752	21.036	21.0849	20.6901	20.7047
	0.752131	0.19349	AT4G13850.3;AT4G13850.2;AT4G13850.1;AT4G13850.4	AT4G13850.3;AT4G13850.2;AT4G13850.1;AT4G13850.4	647	Color2 [DarkGray]	1	4					-1	5	5	5	51.4	51.4	51.4	14.691	0	129.42	76955000	6	22	23.0485	22.9573	23.0434	23.2476	22.9955	23.3865
	0.440309	0.7934	AT4G13940.4;AT4G13940.2;AT4G13940.3;AT4G13940.1;AT3G23810.1	AT4G13940.4;AT4G13940.2;AT4G13940.3;AT4G13940.1;AT3G23810.1	649	Color2 [DarkGray]	1	4					-1	3	3	3	11.4	11.4	11.4	35.531	0	24.016	5850500	21	7	18.0198	19.9156	18.5922	20.015	20.3067	18.5861
	0.0232676	-0.00540098	AT4G16143.1;AT4G16143.2;AT4G02150.2	AT4G16143.1;AT4G16143.2	656	Color2 [DarkGray]	1	4					-1	7	7	3	15	15	9.9	58.906	0	48.709	21660000	25	20	21.3476	21.5812	21.3628	21.394	21.4253	21.4561
	0.325835	0.678544	AT4G16280.4;AT4G16280.2;AT4G16280.3;AT4G16280.1	AT4G16280.4;AT4G16280.2;AT4G16280.3	657	Color2 [DarkGray]	1	4					-1	3	3	3	8.5	8.5	8.5	73.583	0	32.951	24437000	31	10	21.6816	19.2638	21.9232	21.7984	21.4327	21.6731
	0.0210319	0.0102386	AT4G16420.2;AT4G16420.3;AT4G16420.1	AT4G16420.2;AT4G16420.3;AT4G16420.1	658	Color2 [DarkGray]	1	4					-1	10	10	10	28.8	28.8	28.8	55.723	0	84.572	50180000	23	40	21.7825	21.6233	21.8581	21.6625	22.0544	21.5777
	0.149987	0.347493	AT4G17330.3;AT4G17330.2;AT4G17330.1	AT4G17330.3;AT4G17330.2;AT4G17330.1	661	Color2 [DarkGray]	1	4					-1	11	11	11	10.9	10.9	10.9	214.2	0	70.603	11328000	88	20	20.2597	19.1801	18.2073	18.3168	20.3205	20.0523
	0.093276	-0.176119	AT4G17520.1	AT4G17520.1	663	Color2 [DarkGray]	1	4					-1	5	4	4	22.8	18.9	18.9	38.905	0	27.836	5970400	18	10	18.9111	19.0642	20.3469	19.7047	18.273	19.8161
	1.10285	0.286774	AT4G18040.1	AT4G18040.1	666	Color2 [DarkGray]	1	4					-1	7	7	7	48.5	48.5	48.5	26.519	0	79.847	188940000	13	38	24.4668	24.1986	24.087	24.4621	24.5255	24.6251
	1.06394	-4.35302	AT4G18090.1	AT4G18090.1	667	Color2 [DarkGray]	1	4					-1	1	1	1	3.2	3.2	3.2	31.971	0.0053362	6.1277	126850000	12	10	25.6709	24.7227	25.1033	18.7355	24.6131	19.0893
	0.844355	0.114136	AT4G19210.1	AT4G19210.1	671	Color2 [DarkGray]	1	4					-1	13	13	13	19.5	19.5	19.5	68.389	0	136.85	77687000	29	66	21.4814	21.3278	21.3111	21.451	21.5506	21.4611
	0.103022	-0.0586421	AT4G20360.2;AT4G20360.1	AT4G20360.2;AT4G20360.1	673	Color2 [DarkGray]	1	4					-1	13	13	13	28.2	28.2	28.2	51.63	0	121.41	100730000	25	49	23.7065	23.0343	23.549	23.4185	23.3711	23.3243
	0.332548	0.349289	AT4G21660.1;AT4G21660.2;AT4G21660.3	AT4G21660.1;AT4G21660.2;AT4G21660.3	676	Color2 [DarkGray]	1	4					-1	9	9	9	24.8	24.8	24.8	66.833	0	80.996	24041000	19	29	21.1127	19.8011	20.7073	21.1552	20.9987	20.5152
	0.202644	-0.660501	AT4G22670.1	AT4G22670.1	679	Color2 [DarkGray]	1	4					-1	2	2	2	7.7	7.7	7.7	46.621	0	44.127	11686000	18	10	21.3836	19.1964	21.3565	20.7593	17.9493	21.2464
	0.0311607	0.0157032	AT4G24280.1	AT4G24280.1	683	Color2 [DarkGray]	1	4					-1	58	19	19	53.9	20.6	20.6	76.507	0	186.1	150290000	38	70	23.138	22.7738	23.1099	22.8183	23.2437	23.0068
	0.163631	0.065759	AT4G25840.1	AT4G25840.1	694	Color2 [DarkGray]	1	4					-1	3	3	3	8.7	8.7	8.7	33.071	0	26.087	33910000	17	14	22.2768	22.2	22.4268	22.4277	22.5657	22.1074
	0.421368	1.03053	AT4G26110.2;AT4G26110.1	AT4G26110.2;AT4G26110.1	696	Color2 [DarkGray]	1	4					-1	3	3	3	17	17	17	41.607	0	25.533	8800200	16	12	20.2137	17.1247	19.9857	19.5092	20.5007	20.4058
	0.0369214	0.0108223	AT4G26780.1	AT4G26780.1	698	Color2 [DarkGray]	1	4					-1	15	14	14	50.5	47.1	47.1	36.116	0	164.32	130350000	21	64	22.7695	22.6989	22.8146	22.8666	22.864	22.5849
	0.362193	-1.03916	AT4G27450.1	AT4G27450.1	702	Color2 [DarkGray]	1	4					-1	2	2	2	14	14	14	27.622	0	36.076	22723000	13	11	22.0022	21.993	21.9672	18.5546	22.1117	22.1785
	0.816836	1.35737	AT4G27585.1	AT4G27585.1	703	Color2 [DarkGray]	1	4					-1	4	4	4	17.3	17.3	17.3	45.02	0	26.543	7693000	25	10	20.4574	18.6349	17.8736	20.4727	20.3134	20.252
	0.83252	0.775023	AT4G28440.1	AT4G28440.1	704	Color2 [DarkGray]	1	4					-1	3	3	3	29.4	29.4	29.4	16.459	0	38.377	12788000	9	10	19.32	20.713	19.5706	20.5654	20.7388	20.6244
	0.0015366	-0.00140444	AT4G29410.2;AT4G29410.1	AT4G29410.2;AT4G29410.1	707	Color2 [DarkGray]	1	4					-1	4	3	3	35	35	35	15.91	0	42.08	43218000	7	20	22.3745	22.0099	21.6672	21.7324	22.4429	21.872
	0.671754	0.0828387	AT4G31200.3;AT4G31200.2;AT4G31200.1	AT4G31200.3;AT4G31200.2;AT4G31200.1	711	Color2 [DarkGray]	1	4					-1	40	40	40	48.2	48.2	48.2	72.496	0	323.31	1945300000	20	278	26.992	27.1753	27.1138	27.1516	27.2042	27.1738
	0.346794	0.708748	AT4G31440.1	AT4G31440.1	712	Color2 [DarkGray]	1	4					-1	4	4	4	14.5	14.5	14.5	41.801	0	39.613	11815000	23	19	17.9334	20.4019	20.4931	20.5118	20.3526	20.0902
	0.0830023	0.273474	AT4G31490.3;AT4G31490.2;AT4G31490.1;AT4G31480.9;AT4G31480.8;AT4G31480.7;AT4G31480.5;AT4G31480.4;AT4G31480.2;AT4G31480.1;AT4G31480.6;AT4G31480.3	AT4G31490.3;AT4G31490.2;AT4G31490.1;AT4G31480.9;AT4G31480.8;AT4G31480.7;AT4G31480.5;AT4G31480.4;AT4G31480.2;AT4G31480.1;AT4G31480.6;AT4G31480.3	713	Color2 [DarkGray]	1	4					-1	1	1	1	1.9	1.9	1.9	106.08	0	10.625	13054000	42	11	18.5256	21.5393	21.2511	21.4546	19.3937	21.288
	0.174336	0.0618305	AT4G31720.3;AT4G31720.2;AT4G31720.1	AT4G31720.3;AT4G31720.2;AT4G31720.1	715	Color2 [DarkGray]	1	4					-1	6	6	6	44	44	44	14.913	0	50.363	40771000	7	25	22.0402	21.5916	21.8295	21.9331	21.9001	21.8137
	0.576369	0.653299	AT4G32551.1;AT4G32551.2	AT4G32551.1;AT4G32551.2	718	Color2 [DarkGray]	1	4					-1	11	11	11	19.9	19.9	19.9	102.23	0	92.336	19050000	36	27	20.7098	19.0342	20.1965	20.7794	20.4538	20.6672
	0.473501	0.878649	AT4G32840.1	AT4G32840.1	720	Color2 [DarkGray]	1	4					-1	7	7	3	18.4	18.4	9.3	50.787	0	67.722	19055000	24	19	21.142	20.7042	18.6073	21.2876	21.1379	20.664
	0.590975	0.780605	AT4G34030.1	AT4G34030.1	723	Color2 [DarkGray]	1	4					-1	18	18	18	26.4	26.4	26.4	64.012	0	323.31	201040000	29	88	22.0007	23.5231	23.9326	23.8433	23.9278	24.0272
	0.183704	-0.0310796	AT4G34110.1	AT4G34110.1	724	Color2 [DarkGray]	1	4					-1	12	10	10	28.6	23.4	23.4	68.672	0	98.69	50081000	29	49	21.6999	21.8376	21.8835	21.798	21.8194	21.7102
	0.685213	-0.203156	AT4G34200.1;AT3G19480.1	AT4G34200.1	725	Color2 [DarkGray]	1	4					-1	7	7	7	16.7	16.7	16.7	63.324	0	44.299	16178000	29	22	21.3289	20.9804	21.009	20.7735	20.9003	21.0352
	0.710047	1.0173	AT4G34290.1;AT2G14880.1	AT4G34290.1;AT2G14880.1	727	Color2 [DarkGray]	1	4					-1	4	4	4	38.2	38.2	38.2	15.998	0	30.189	19375000	9	16	19.0669	21.1777	20.7599	21.1573	21.5301	21.3689
	0.209105	0.484109	AT4G34870.1	AT4G34870.1	733	Color2 [DarkGray]	1	4					-1	6	4	4	36	30.8	30.8	18.378	0	55.21	17806000	10	15	21.5176	18.7472	21.1528	20.8808	21.3702	20.619
	0.0871246	-0.260608	AT4G35260.1;AT4G35650.1	AT4G35260.1	734	Color2 [DarkGray]	1	4					-1	5	5	4	16.1	16.1	11.7	39.626	0	45.73	23634000	15	21	22.0334	19.3026	20.4358	18.9169	20.9753	21.0978
	0.697695	0.974442	AT4G36020.2;AT4G36020.3;AT4G36020.1	AT4G36020.2;AT4G36020.3;AT4G36020.1	737	Color2 [DarkGray]	1	4					-1	2	2	2	12.8	12.8	12.8	26.68	0	16.49	7847100	14	10	20.411	18.5768	18.4341	20.1099	20.1338	20.1015
	0.0674611	0.0983518	AT4G37870.1	AT4G37870.1	740	Color2 [DarkGray]	1	4					-1	5	5	5	11.2	11.2	11.2	73.404	0	50.021	18430000	34	17	19.6914	21.1416	20.9001	20.2022	20.9788	20.8472
	0.574608	-0.0817121	AT4G37910.2;AT4G37910.1	AT4G37910.2;AT4G37910.1	741	Color2 [DarkGray]	1	4					-1	45	44	35	63.9	62.9	59.2	73.074	0	323.31	923910000	40	225	24.7755	24.57	24.6412	24.6168	24.5748	24.5499
	0.192274	-0.102792	AT4G38630.1	AT4G38630.1	743	Color2 [DarkGray]	1	4					-1	2	2	2	9.8	9.8	9.8	40.757	0	31.839	11730000	14	11	20.923	21.0062	20.8621	20.4412	20.9273	21.1144
	0.252762	-0.126289	AT4G38680.1	AT4G38680.1	744	Color2 [DarkGray]	1	4					-1	4	4	4	26.6	26.6	26.6	19.153	0	68.147	45884000	10	17	23.0409	23.2103	22.7202	23.1076	22.635	22.85
	1.11102	0.581553	AT4G39960.2;AT4G39960.1	AT4G39960.2;AT4G39960.1	747	Color2 [DarkGray]	1	4					-1	7	3	3	13	7.6	7.6	48.031	0	26.911	46251000	24	11	22.0426	21.7687	21.5871	22.5103	22.658	21.9748
	0.254442	0.902651	AT4G40030.1;AT4G40040.2;AT5G10980.1;AT4G40040.3;AT4G40030.2;AT4G40040.1;AT4G40030.4;AT4G40030.3;AT1G09200.1;AT5G10390.1;AT5G10400.1;AT5G65360.1;AT3G27360.1;AT1G75600.1;AT1G13370.1;AT5G65350.1;AT1G19890.1	AT4G40030.1;AT4G40040.2;AT5G10980.1;AT4G40040.3;AT4G40030.2;AT4G40040.1;AT4G40030.4;AT4G40030.3;AT1G09200.1;AT5G10390.1;AT5G10400.1;AT5G65360.1;AT3G27360.1;AT1G75600.1;AT1G13370.1;AT5G65350.1	748	Color2 [DarkGray]	1	4					-1	5	5	5	25	25	25	15.406	0	31.572	54761000	4	14	19.1051	23.6748	22.8595	22.7965	22.6516	22.8993
	0.854007	0.471763	AT5G01380.1	AT5G01380.1	749	Color2 [DarkGray]	1	4					-1	12	12	12	30.7	30.7	30.7	38.272	0	133.15	195200000	13	60	23.4892	23.0574	23.8504	24.1624	23.7792	23.8708
	0.331322	0.540626	AT5G02450.1	AT5G02450.1	750	Color2 [DarkGray]	1	4					-1	3	3	1	32.4	32.4	10.2	12.189	0	23.57	7332900	4	10	19.8516	19.9871	17.9279	19.7514	19.6529	19.9841
	0.536433	1.34099	AT5G02490.1;AT1G56410.1	AT5G02490.1;AT1G56410.1	751	Color2 [DarkGray]	1	4					-1	35	9	7	47.8	15.2	13.2	71.386	0	65.555	22080000	36	23	17.9962	21.3724	21.2179	21.6434	21.41	21.556
	0.671309	0.171603	AT5G02500.1;AT5G02500.2	AT5G02500.1;AT5G02500.2	752	Color2 [DarkGray]	1	4					-1	46	46	9	59.3	59.3	22.7	71.357	0	323.31	1816500000	37	318	25.225	24.892	25.0996	25.1688	25.37	25.1927
	1.54983	0.531567	AT5G02870.1;AT5G02870.2	AT5G02870.1;AT5G02870.2	754	Color2 [DarkGray]	1	4					-1	6	4	4	19.7	13.3	13.3	44.721	0	47.291	18070000	19	20	20.3654	20.3153	20.7223	20.8471	21.1663	20.9843
	0.00297913	0.010959	AT5G05780.1;AT5G05780.2;AT3G11270.1;AT3G11270.2	AT5G05780.1;AT5G05780.2;AT3G11270.1	760	Color2 [DarkGray]	1	4					-1	5	5	5	23.7	23.7	23.7	34.728	0	43.015	16888000	16	16	21.4443	18.605	21.0936	20.9725	21.4006	18.8026
	0.28211	0.716048	AT5G06160.1	AT5G06160.1	761	Color2 [DarkGray]	1	4					-1	6	6	6	20	20	20	58.971	0	37.472	12924000	28	14	21.012	19.5417	18.5336	21.1324	21.1436	18.9595
	0.319644	0.146977	AT5G07350.2;AT5G07350.1;AT5G61780.1	AT5G07350.2;AT5G07350.1	763	Color2 [DarkGray]	1	4					-1	11	11	11	16	16	16	110.05	0	83.83	60873000	55	35	23.1901	22.6867	23.2425	23.2099	23.2846	23.0657
	0.350484	-0.0806478	AT5G08300.1;AT5G23250.2;AT5G23250.3	AT5G08300.1	764	Color2 [DarkGray]	1	4					-1	6	6	3	31.4	31.4	15.3	36.151	0	49.358	17960000	16	17	20.9436	20.8608	21.0519	20.775	21.0256	20.8137
	0.0263143	0.0100212	AT5G08450.3;AT5G08450.2;AT5G08450.1	AT5G08450.3;AT5G08450.2;AT5G08450.1	765	Color2 [DarkGray]	1	4					-1	15	15	15	23.2	23.2	23.2	104.15	0	131.03	59254000	46	51	21.7377	21.4202	21.4944	21.5298	21.7198	21.4328
	0.978084	-0.386756	AT5G08690.1;AT5G08670.1;AT5G08680.1	AT5G08690.1;AT5G08670.1;AT5G08680.1	767	Color2 [DarkGray]	1	4					-1	15	15	14	38.7	38.7	36.7	59.712	0	175.85	110410000	30	53	22.7994	22.6606	22.6846	21.973	22.5599	22.4514
	0.0729237	0.0194327	AT5G09590.1;AT4G32208.1	AT5G09590.1	768	Color2 [DarkGray]	1	4					-1	45	35	35	62	60.6	60.6	72.99	0	323.31	717960000	38	167	24.7292	24.5122	24.8008	24.6532	24.7679	24.6794
	0.463651	-0.1981	AT5G09620.2;AT5G09620.1	AT5G09620.2;AT5G09620.1	769	Color2 [DarkGray]	1	4					-1	6	6	5	23.3	23.3	19.9	55.03	0	46.262	17741000	18	18	20.8214	21.1218	20.7794	20.9654	20.7167	20.4462
	0.923297	0.850298	AT5G09650.1	AT5G09650.1	770	Color2 [DarkGray]	1	4					-1	4	4	4	25.7	25.7	25.7	33.38	0	33.06	6669800	14	9	18.4842	19.2519	19.1334	19.9084	20.3699	19.1421
	0.480831	-0.0765285	AT5G09810.1	AT5G09810.1	771	Color2 [DarkGray]	1	4					-1	20	20	3	65	65	13.5	41.735	0	238.72	455110000	21	102	24.7863	24.6046	24.7168	24.7116	24.6044	24.5621
	0.881799	2.5515	AT5G09900.2;AT5G09900.1;AT5G09900.3;AT5G64760.3;AT5G64760.2;AT5G64760.1	AT5G09900.2;AT5G09900.1;AT5G09900.3	772	Color2 [DarkGray]	1	4					-1	6	6	6	16.7	16.7	16.7	50.85	0	53.277	24125000	26	18	18.456	18.1211	22.3137	22.094	22.1024	22.3489
	1.1564	0.313009	AT5G10360.1;AT5G10360.2	AT5G10360.1;AT5G10360.2	776	Color2 [DarkGray]	1	4					-1	9	9	4	27.3	27.3	17.7	28.162	0	65.192	38928000	10	25	21.9416	21.7269	21.9667	22.384	22.0366	22.1535
	0.363013	0.362645	AT5G10450.2;AT5G10450.1;AT5G10450.3;AT5G10450.4	AT5G10450.2;AT5G10450.1;AT5G10450.3;AT5G10450.4	777	Color2 [DarkGray]	1	4					-1	5	4	4	23.6	20.3	20.3	27.718	0	33.839	29523000	16	21	21.7963	20.4332	21.3354	21.323	21.6233	21.7066
	0.548855	-0.301147	AT5G10860.1	AT5G10860.1	779	Color2 [DarkGray]	1	4					-1	5	5	5	24.3	24.3	24.3	22.729	0	55.606	31679000	14	16	22.7733	22.1538	22.6599	21.9305	22.3354	22.4178
	0.835296	0.71322	AT5G11110.1	AT5G11110.1	780	Color2 [DarkGray]	1	4					-1	4	4	4	6.5	6.5	6.5	116.96	0	61.728	4913200	49	8	19.1637	19.4599	18.1815	19.7546	19.7148	19.4753
	0.601236	-0.17641	AT5G12110.1	AT5G12110.1	783	Color2 [DarkGray]	1	4					-1	9	7	7	54.4	50	50	24.788	0	82.752	43862000	9	25	22.4181	22.2414	22.5852	22.1117	22.4026	22.2012
	1.00305	0.269368	AT5G12140.1	AT5G12140.1	784	Color2 [DarkGray]	1	4					-1	5	5	4	72.3	72.3	64.4	11.255	0	42.838	24007000	6	21	20.7875	20.475	20.8396	20.9429	21.074	20.8933
	0.231678	-0.112633	AT5G12220.2;AT5G12220.1	AT5G12220.2;AT5G12220.1	786	Color2 [DarkGray]	1	4					-1	5	5	5	10.2	10.2	10.2	67.991	0	50.869	14576000	36	16	20.2886	20.6259	20.5571	20.3327	20.6759	20.1252
	0.317006	1.19672	AT5G12240.1;AT5G12240.2	AT5G12240.1;AT5G12240.2	787	Color2 [DarkGray]	1	4					-1	2	2	2	25.4	25.4	25.4	7.8194	0	29.184	19273000	6	11	18.0144	21.9476	18.5843	21.36	18.8609	21.9155
	0.831811	-0.421219	AT5G13420.1	AT5G13420.1	794	Color2 [DarkGray]	1	4					-1	9	9	9	23.3	23.3	23.3	47.698	0	95.226	20739000	28	21	21.2677	20.8207	21.3841	20.5033	21.0432	20.6623
	0.912588	-0.340492	AT5G13490.2;AT5G13490.1;AT4G28390.2;AT4G28390.1	AT5G13490.2;AT5G13490.1	795	Color2 [DarkGray]	1	4					-1	8	8	5	23.4	23.4	17.1	41.745	0	61.653	43723000	19	34	21.4128	21.136	21.0029	21.0776	20.6478	20.8048
	2.58812	-0.580271	AT5G15090.2;AT5G15090.1	AT5G15090.2;AT5G15090.1	806	Color2 [DarkGray]	1	4					-1	7	7	5	33.9	33.9	29.2	29.21	0	82.499	30611000	13	29	21.6001	21.4711	21.563	20.8479	20.9338	21.1116
	1.00847	2.27696	AT5G15520.1;AT5G61170.1	AT5G15520.1;AT5G61170.1	808	Color2 [DarkGray]	1	4					-1	5	5	1	37.1	37.1	7.7	15.817	0	37.267	19131000	9	13	17.6471	18.2111	21.0537	21.0407	21.3869	21.3153
	0.967184	-0.0749391	AT5G15530.1	AT5G15530.1	809	Color2 [DarkGray]	1	4					-1	10	9	9	40.8	37.3	37.3	27.279	0	206.39	386210000	14	74	25.1457	25.2016	25.0967	25.0336	25.0978	25.0878
	0.0126109	0.0164661	AT5G15980.1	AT5G15980.1	811	Color2 [DarkGray]	1	4					-1	2	2	2	6	6	6	75.298	0	18.635	6386600	40	10	19.9439	18.9795	19.8949	19.0503	19.7764	20.0411
	0.831654	0.228431	AT5G16130.1;AT3G02560.3;AT3G02560.2;AT3G02560.1	AT5G16130.1	813	Color2 [DarkGray]	1	4					-1	6	6	6	27.9	27.9	27.9	22.06	0	48.309	13289000	8	18	20.343	20.1291	19.9574	20.2651	20.3715	20.4782
	1.09993	-0.202845	AT5G16220.1	AT5G16220.1	814	Color2 [DarkGray]	1	4					-1	15	15	15	36.1	36.1	36.1	52.31	0	261.88	294130000	19	73	24.0225	24.025	23.8413	23.8436	23.7973	23.6394
	0.481137	-0.185251	AT5G16390.2;AT5G16390.1	AT5G16390.2;AT5G16390.1	816	Color2 [DarkGray]	1	4					-1	19	19	18	41.7	41.7	41.7	26.927	0	323.31	14441000000	11	228	30.8187	31.038	30.4967	30.6802	30.4886	30.6288
	0.200719	0.430012	AT5G16710.1	AT5G16710.1	817	Color2 [DarkGray]	1	4					-1	4	4	4	17.4	17.4	17.4	28.514	0	26.344	9645400	18	13	20.6966	17.9957	20.0721	19.8102	20.2328	20.0114
	0.0732774	0.146757	AT5G16930.1	AT5G16930.1	820	Color2 [DarkGray]	1	4					-1	4	4	4	9.8	9.8	9.8	70.992	0	28.13	6658900	39	10	18.2266	18.8843	19.773	19.7875	19.4978	18.0389
	0.781743	-3.33306	AT5G16970.1;AT5G16990.1	AT5G16970.1	821	Color2 [DarkGray]	1	4					-1	4	4	4	18.8	18.8	18.8	38.133	0	42.39	34149000	18	14	22.1886	23.5757	22.4523	23.2443	17.4129	17.5602
	0.470581	0.53607	AT5G17330.1	AT5G17330.1	823	Color2 [DarkGray]	1	4					-1	4	4	4	11	11	11	57.066	0	29.443	11466000	24	14	20.5263	19.1742	20.7116	20.5581	20.8581	20.6042
	0.336324	0.098678	AT5G17510.2;AT5G17510.1	AT5G17510.2;AT5G17510.1	826	Color2 [DarkGray]	1	4					-1	9	9	9	33.1	33.1	33.1	42.554	0	75.06	31501000	19	37	20.6088	20.4899	20.8663	20.6809	20.735	20.8451
	0.174658	-0.0490284	AT5G17710.3;AT5G17710.1;AT5G17710.2	AT5G17710.3;AT5G17710.1;AT5G17710.2	827	Color2 [DarkGray]	1	4					-1	14	14	14	46.6	46.6	46.6	35.493	0	178.03	232820000	17	68	24.3156	24.0062	24.0651	23.9842	24.1368	24.1189
	0.154322	-0.258111	AT5G17920.2;AT5G17920.1;AT3G03780.3;AT3G03780.2;AT3G03780.1;AT5G20980.2;AT5G20980.1	AT5G17920.2;AT5G17920.1;AT3G03780.3;AT3G03780.2;AT3G03780.1	829	Color2 [DarkGray]	1	4					-1	8	8	8	12.7	12.7	12.7	84.356	0	57.244	22700000	38	26	19.6939	20.9895	21.8169	20.4347	20.531	20.7604
	0.508157	0.236153	AT5G18230.3;AT5G18230.1;AT5G18230.2;AT5G18230.4	AT5G18230.3;AT5G18230.1;AT5G18230.2;AT5G18230.4	832	Color2 [DarkGray]	1	4					-1	8	8	8	15	15	15	89.982	0	56.141	17532000	33	22	20.3317	20.0599	20.7107	20.744	20.4829	20.5838
	0.633167	-0.239386	AT5G18440.2;AT5G18440.1	AT5G18440.2;AT5G18440.1	833	Color2 [DarkGray]	1	4					-1	10	10	10	20.6	20.6	20.6	53.645	0	89.823	44242000	14	32	21.3874	21.6283	21.6236	21.5974	21.2319	21.0918
	0.921108	-0.0877876	AT5G19510.1	AT5G19510.1	837	Color2 [DarkGray]	1	4					-1	11	11	9	50.4	50.4	39.7	24.201	0	144.78	120520000	10	58	22.5898	22.4864	22.4814	22.4067	22.4855	22.402
	0.24988	-0.0664177	AT5G19550.1	AT5G19550.1	838	Color2 [DarkGray]	1	4					-1	8	8	8	18.8	18.8	18.8	44.266	0	56.752	27293000	27	36	20.6482	20.595	20.8268	20.4867	20.7589	20.6251
	0.25304	-0.0661379	AT5G55190.1;AT5G20020.1;AT5G20010.1	AT5G55190.1;AT5G20020.1;AT5G20010.1	841	Color2 [DarkGray]	1	4					-1	7	7	7	26.7	26.7	26.7	25.079	0	54.589	34657000	11	22	21.8562	21.8275	22.0788	21.9721	21.741	21.8511
	1.37915	-0.49987	AT5G20280.1;AT1G04920.1	AT5G20280.1	845	Color2 [DarkGray]	1	4					-1	8	8	8	11.9	11.9	11.9	117.32	0	72.745	27471000	46	23	21.6646	22.2023	21.9369	21.3255	21.5573	21.4214
	0.00455558	0.00113742	AT5G20290.1;AT5G59240.1	AT5G20290.1	846	Color2 [DarkGray]	1	4					-1	11	11	11	54.5	54.5	54.5	24.993	0	125.2	107050000	9	45	23.1992	23.1875	23.1747	23.3361	23.1736	23.0551
	1.83276	-0.352921	AT5G20720.4;AT5G20720.3;AT5G20720.2;AT5G20720.1	AT5G20720.4;AT5G20720.3;AT5G20720.2;AT5G20720.1	848	Color2 [DarkGray]	1	4					-1	15	15	15	56.9	56.9	56.9	26.802	0	196.19	279350000	15	70	24.3684	24.2102	24.4216	23.8984	24.0918	23.9513
	0.356526	0.171246	AT5G20890.1	AT5G20890.1	849	Color2 [DarkGray]	1	4					-1	10	10	10	22.6	22.6	22.6	57.285	0	100.03	60748000	31	43	22.2919	22.3231	22.8698	22.8034	22.6113	22.5839
	0.723949	-0.19381	AT5G20920.1;AT5G20920.3;AT5G20920.2	AT5G20920.1;AT5G20920.3;AT5G20920.2	850	Color2 [DarkGray]	1	4					-1	5	5	5	22	22	22	30.663	0	53.55	15662000	12	21	20.6426	21.0099	20.6718	20.6107	20.5142	20.618
	0.442421	0.126612	AT5G21160.1;AT5G21160.2;AT5G21160.3	AT5G21160.1;AT5G21160.2;AT5G21160.3	852	Color2 [DarkGray]	1	4					-1	10	10	10	17.2	17.2	17.2	91.376	0	112.41	80934000	38	40	22.6637	22.6972	22.77	23.0743	22.728	22.7085
	1.23876	-0.362593	AT5G22330.1	AT5G22330.1	855	Color2 [DarkGray]	1	4					-1	6	6	6	15.9	15.9	15.9	50.323	0	42.894	12723000	23	18	20.5092	20.0481	20.3017	19.8703	19.9159	19.9851
	1.85309	-0.218519	AT5G22450.3;AT5G22450.2;AT5G22450.1	AT5G22450.3;AT5G22450.2;AT5G22450.1	856	Color2 [DarkGray]	1	4					-1	20	20	20	22.6	22.6	22.6	126.08	0	153.5	48904000	59	62	21.1189	21.2394	21.0799	20.9685	20.8992	20.915
	0.295162	0.0592429	AT5G23540.2;AT5G23540.1	AT5G23540.2;AT5G23540.1	861	Color2 [DarkGray]	1	4					-1	3	3	3	15.1	15.1	15.1	29.207	0	28.395	14869000	13	16	20.8419	20.5825	20.7348	20.8266	20.7211	20.7893
	0.19149	-0.0396824	AT5G25060.1;AT5G10800.3;AT5G10800.1;AT5G10800.2	AT5G25060.1	865	Color2 [DarkGray]	1	4					-1	78	78	78	58	58	58	108.28	0	323.31	6372200000	52	582	27.2101	27.0056	27.0413	26.9943	27.1424	27.0013
	0.0238366	-0.0072155	AT5G25150.1;AT5G25150.2	AT5G25150.1;AT5G25150.2	866	Color2 [DarkGray]	1	4					-1	11	11	11	21.5	21.5	21.5	74.413	0	127.59	134830000	26	50	23.2204	23.5301	23.3299	23.264	23.4096	23.3851
	0.703632	-0.198017	AT5G26860.1;AT3G05780.1	AT5G26860.1	877	Color2 [DarkGray]	1	4					-1	10	10	10	12.4	12.4	12.4	109.16	0	69.718	29640000	53	30	21.4168	21.0951	21.0115	21.013	21.0098	20.9065
	1.4385	0.308474	AT5G27700.1	AT5G27700.1	880	Color2 [DarkGray]	1	4					-1	3	3	1	39	39	19.5	9.1131	0	38.678	22434000	2	14	20.9557	21.1893	21.2828	21.4701	21.4756	21.4075
	0.73164	0.609049	AT5G27770.1	AT5G27770.1	883	Color2 [DarkGray]	1	4					-1	6	6	3	49.2	49.2	21.8	14.047	0	46.122	48253000	6	22	21.9573	21.1022	21.6197	22.7097	22.0756	21.7211
	0.693904	-0.0872796	AT5G28540.1;AT1G09080.2;AT1G09080.1	AT5G28540.1	885	Color2 [DarkGray]	1	4					-1	34	31	2	40.2	36	4.2	73.628	0	287.71	261720000	31	138	22.8015	22.7586	22.7008	22.7595	22.5918	22.6477
	0.564132	0.103745	AT5G35360.1;AT5G35360.3;AT5G35360.2	AT5G35360.1;AT5G35360.3;AT5G35360.2	886	Color2 [DarkGray]	1	4					-1	61	61	61	69.5	69.5	69.5	58.386	0	323.31	42208000000	31	675	30.3145	30.1208	30.2103	30.2009	30.3907	30.3652
	0.840618	0.217078	AT5G38480.3;AT5G38480.2;AT5G38480.1;AT1G78300.1	AT5G38480.3;AT5G38480.2;AT5G38480.1	892	Color2 [DarkGray]	1	4					-1	8	8	3	26.8	26.8	12.2	28.491	0	74.126	126330000	15	42	23.7666	23.4713	23.8347	23.8619	23.9958	23.8662
	0.871587	-0.209646	AT5G40370.1;AT5G40370.2	AT5G40370.1;AT5G40370.2	894	Color2 [DarkGray]	1	4					-1	4	4	4	59.5	59.5	59.5	11.756	0	30.273	20080000	6	17	20.8307	20.7256	21.0289	20.6428	20.7743	20.5392
	0.897508	-0.341646	AT5G40490.1;AT5G40490.2	AT5G40490.1;AT5G40490.2	895	Color2 [DarkGray]	1	4					-1	10	10	10	28.4	28.4	28.4	42.407	0	104.24	70832000	20	47	22.4299	22.4243	22.7522	22.4348	21.9477	22.1989
	0.123042	0.510764	AT5G40550.1;AT5G40550.2;AT5G40550.3;AT5G40550.4	AT5G40550.1;AT5G40550.2;AT5G40550.3;AT5G40550.4	896	Color2 [DarkGray]	1	4					-1	13	6	6	54.9	26.7	26.7	30.885	0	39.098	10200000	19	13	17.9379	19.1035	20.807	17.258	21.0337	21.089
	0.00983615	-0.00458463	AT5G41520.1;AT5G41520.2	AT5G41520.1;AT5G41520.2	899	Color2 [DarkGray]	1	4					-1	6	6	6	26.7	26.7	26.7	19.733	0	48.578	32981000	10	25	21.5036	21.7406	21.6739	21.7767	21.7654	21.3622
	0.0715195	0.160939	AT5G42150.1	AT5G42150.1	902	Color2 [DarkGray]	1	4					-1	3	3	3	9.5	9.5	9.5	35.549	0	17.679	6458300	21	10	19.1421	18.7388	20.2356	20.1816	20.1828	18.2351
	0.176294	-0.149787	AT5G43780.1	AT5G43780.1	910	Color2 [DarkGray]	1	4					-1	8	8	4	27.3	27.3	13.9	52.125	0	55.91	7557100	30	15	19.2969	19.2985	18.8721	19.3401	19.2486	18.4295
	0.941909	-0.101581	AT5G43960.2;AT5G43960.1	AT5G43960.2;AT5G43960.1	911	Color2 [DarkGray]	1	4					-1	10	10	10	32.7	32.7	32.7	43.484	0	161.58	563390000	20	66	25.5704	25.4548	25.4026	25.383	25.3843	25.3558
	0.0583447	-0.0246811	AT5G44340.1;AT1G20010.1;CON__ENSEMBL:ENSBTAP00000025008	AT5G44340.1	913	Color2 [DarkGray]	1	4					-1	18	6	3	42.3	18.5	7.2	49.823	0	74.096	77457000	20	31	22.2762	22.5861	22.3741	22.1653	22.4519	22.5452
	0.00295038	0.00753339	AT5G47030.1	AT5G47030.1	918	Color2 [DarkGray]	1	4					-1	2	2	2	18.7	18.7	18.7	21.547	0	13.704	8674500	10	6	18.5635	19.9027	20.286	20.0262	20.4372	18.3115
	0.98751	-0.0938562	AT5G47210.1;AT5G47210.3;AT5G47210.2;AT4G16830.2;AT4G16830.3;AT4G16830.1	AT5G47210.1;AT5G47210.3	919	Color2 [DarkGray]	1	4					-1	9	9	8	27.2	27.2	23.2	37.999	0	85.993	49862000	20	47	21.3065	21.1785	21.2082	21.1815	21.1154	21.1147
	0.0774995	0.163537	AT5G48030.1	AT5G48030.1	921	Color2 [DarkGray]	1	4					-1	3	3	3	10.5	10.5	10.5	49.437	0	22.62	9102800	24	13	20.6374	18.4905	20.3222	19.4349	20.5514	19.9545
	0.864043	-0.274519	AT5G48480.1	AT5G48480.1	922	Color2 [DarkGray]	1	4					-1	4	4	4	21.7	21.7	21.7	17.557	0	33.645	18257000	10	18	21.0846	21.0477	21.506	20.9677	20.9168	20.9303
	0.190848	0.0288118	AT5G49910.1	AT5G49910.1	924	Color2 [DarkGray]	1	4					-1	64	64	25	55.4	55.4	23.3	76.996	0	323.31	2250600000	36	342	25.9998	25.9785	25.8844	26.0416	26.0145	25.8931
	0.272299	-0.38059	AT5G50850.1	AT5G50850.1	927	Color2 [DarkGray]	1	4					-1	2	2	2	8.3	8.3	8.3	39.175	0	24.812	6035200	16	9	20.0391	19.016	20.0773	19.5116	19.9841	18.4949
	0.0365886	-0.123935	AT5G51590.1	AT5G51590.1	930	Color2 [DarkGray]	1	4					-1	3	3	3	13.6	13.6	13.6	44.594	0	44.382	13382000	13	11	21.2235	18.3838	21.2082	20.4919	18.8855	21.0663
	0.181874	-1.03478	AT5G52690.1	AT5G52690.1	934	Color2 [DarkGray]	1	4					-1	1	1	1	6.2	6.2	6.2	20.613	0.0054705	6.3086	24381000	11	9	17.7918	22.3984	22.9331	18.5203	22.8553	18.6433
	1.35945	-0.239818	AT5G52840.1;AT5G52840.2	AT5G52840.1;AT5G52840.2	935	Color2 [DarkGray]	1	4					-1	10	10	10	53.3	53.3	53.3	19.179	0	67.648	25169000	11	30	20.8893	21.1081	20.9253	20.7173	20.6629	20.823
	0.19649	-0.0651677	AT5G54580.1	AT5G54580.1	942	Color2 [DarkGray]	1	4					-1	7	7	7	64.1	64.1	64.1	17.09	0	58.845	23185000	11	20	21.2793	21.6323	21.5672	21.3906	21.5578	21.3349
	1.08811	1.56138	AT5G54760.4;AT5G54760.3;AT5G54760.2;AT5G54760.1;AT4G27130.1;AT1G54290.1;AT5G54940.3;AT5G54940.2;AT5G54940.1	AT5G54760.4;AT5G54760.3;AT5G54760.2;AT5G54760.1;AT4G27130.1;AT1G54290.1;AT5G54940.3;AT5G54940.2;AT5G54940.1	943	Color2 [DarkGray]	1	4					-1	4	4	4	49.6	49.6	49.6	12.62	0	24.937	12022000	4	12	18.8024	18.5196	20.6227	21.161	20.6914	20.7764
	1.3569	-0.301315	AT5G55200.1	AT5G55200.1	946	Color2 [DarkGray]	1	4					-1	15	15	14	49.7	49.7	46	33.202	0	231.31	130300000	19	80	22.967	22.8215	22.9534	22.4323	22.6646	22.741
	0.960094	1.20742	AT5G55210.1	AT5G55210.1	947	Color2 [DarkGray]	1	4					-1	2	2	2	20.8	20.8	20.8	18.527	0	15.801	6795400	9	7	20.0212	18.3225	18.2249	20.1051	19.9066	20.1791
	0.0860303	-0.0459881	AT5G56030.1;AT5G56030.2	AT5G56030.1;AT5G56030.2	949	Color2 [DarkGray]	1	4					-1	25	25	2	34.3	34.3	4.7	80.063	0	259.46	290210000	34	123	23.5369	23.0365	23.5005	23.1317	23.4773	23.3269
	1.65612	-0.217137	AT5G58290.1	AT5G58290.1	956	Color2 [DarkGray]	1	4					-1	8	7	7	31.9	31.9	31.9	45.751	0	67.368	20456000	23	23	21.0958	20.9762	20.9459	20.7278	20.8597	20.7791
	0.390925	0.8346	AT5G60230.1;AT5G60230.2	AT5G60230.1;AT5G60230.2	959	Color2 [DarkGray]	1	4					-1	2	2	2	8	8	8	28.518	0	16.048	19279000	14	11	18.8574	21.4116	21.6521	21.5383	21.2661	21.6205
	1.69259	0.371331	AT5G60980.4;AT5G60980.1;AT5G60980.3;AT5G60980.2	AT5G60980.4;AT5G60980.1;AT5G60980.3;AT5G60980.2	961	Color2 [DarkGray]	1	4					-1	10	10	10	25.7	25.7	25.7	49.415	0	103.98	44337000	26	37	21.1052	21.1592	21.2245	21.6551	21.3506	21.5973
	0.208353	-0.192795	AT5G61030.2;AT5G61030.1	AT5G61030.2;AT5G61030.1	963	Color2 [DarkGray]	1	4					-1	6	6	6	26.9	26.9	26.9	29.984	0	74.374	21948000	6	19	20.5578	21.4259	21.6233	21.2978	20.8307	20.9001
	0.00344064	0.0132325	AT5G64270.1	AT5G64270.1	972	Color2 [DarkGray]	1	4					-1	5	5	5	9.7	9.7	9.7	141.45	0	67.348	20339000	61	18	20.9017	18.8176	20.6575	21.2851	21.1346	17.9968
	0.105908	0.0171547	AT5G65540.1	AT5G65540.1	975	Color2 [DarkGray]	1	4					-1	24	24	24	46.9	46.9	46.9	68.736	0	323.31	300940000	35	122	23.716	23.6724	23.6427	23.8002	23.6625	23.6199
	0.0262689	-0.0994765	AT5G65720.1;AT5G65720.3;AT5G65720.2	AT5G65720.1;AT5G65720.3	976	Color2 [DarkGray]	1	4					-1	3	3	3	10.8	10.8	10.8	50.295	0	27.398	8313800	27	10	19.4357	18.1055	21.0056	20.3788	20.3605	17.5091
	0.575451	-1.08716	AT5G67630.1;AT3G49830.1	AT5G67630.1	979	Color2 [DarkGray]	1	4					-1	4	4	4	10.9	10.9	10.9	52.113	0	29.368	8180300	27	11	20.2364	18.803	20.1942	19.9838	18.3651	17.6233

## Sheet: Combined ID (biotin elu)
Proteins in biotin treatment exclusive or with significant enrichment were combined, proteins were eluted by biotin.
Locus Identifier	Gene Model Name	Gene Description	Gene Model Type	Primary Gene Symbol	All Gene Symbols
AT3G08943	AT3G08943.1	ARM repeat superfamily protein;(source:Araport11)	protein_coding
AT4G31700	AT4G31700.1	Encodes a putative ribosomal protein S6 (rps6a). RPS6A and RPS6B are fully redundant and essential during gametogenesis.	protein_coding	RIBOSOMAL PROTEIN S6 (RPS6)	RIBOSOMAL PROTEIN S6 (RPS6); (RPS6A); (ATRPS6);RIBOSOMAL PROTEIN ES6Z (ES6Z)
AT5G57460	AT5G57460.1	TPLATE complex subunit involved in clathirin mediated endocytosis.	protein_coding	TPLATE COMPLEX MUNISCIN-LIKE (TML)	TPLATE COMPLEX MUNISCIN-LIKE (TML)
AT3G50590	AT3G50590.1	WD40/YVTN repeat protein.	protein_coding	(TWD40-1)	(TWD40-1)
AT4G02080	AT4G02080.1	A member of ARF-like GTPase family. A thaliana has 21 members; in two subfamilies; ARF and ARF-like (ARL) GTPases.	protein_coding	SECRETION-ASSOCIATED RAS SUPER FAMILY 2 (SAR2)	(ASAR1); (ATSARA1C);SECRETION-ASSOCIATED RAS SUPER FAMILY 2 (ATSAR2);SECRETION-ASSOCIATED RAS SUPER FAMILY 2 (SAR2); (SAR1C)
AT5G24710	AT5G24710.1	WD40/YVTN repeat protein which cooperates with the AP2 complex in the clathrin-mediated endocytosis of cellulose synthase to regulate cellulose biosynthesis.	protein_coding	TRANSDUCIN/WD40-2 PROTIEN (TWD40-2)	TRANSDUCIN/WD40-2 PROTIEN (TWD40-2)
AT5G11110	AT5G11110.1	Encodes a sucrose-phosphate synthase involved in pollen exine formation. This is the dominant SPS isoform in leaves with respect to protein levels.	protein_coding	SUCROSE PHOSPHATE SYNTHASE 2F (SPS2F)	SUCROSE PHOSPHATE SYNTHASE 1 (SPS1);SUCROSE PHOSPHATE SYNTHASE 2F (ATSPS2F);SUCROSE-PHOSPHATE SYNTHASE A2 (SPSA2);SUCROSE PHOSPHATE SYNTHASE 2F (SPS2F);KAONASHI 2 (KNS2)
AT3G01780	AT3G01780.1	Encodes TPLATE; a cytokinesis protein targeted to the cell plate. Functions in vesicle-trafficking events required for site-specific cell wall modifications during pollen germination and for anchoring of the cell plate to the mother wall at the correct cortical position.	protein_coding	(TPLATE)	(TPLATE)
AT3G13920	AT3G13920.5	eukaryotic translation initiation factor 4A-1	protein_coding
AT4G24800	AT4G24800.1	MA3 domain-containing protein;(source:Araport11)	protein_coding	EIN2 C-TERMINUS INTERACTING PROTEIN 1 (ECIP1)	MA3 DOMAIN-CONTAINING TRANSLATION REGULATORY FACTOR 3 (MRF3);EIN2 C-TERMINUS INTERACTING PROTEIN 1 (ECIP1)
AT3G01560	AT3G01560.1	proline-rich receptor-like kinase; putative (DUF1421);(source:Araport11)	protein_coding	FLOE3 (FLOE3)	FLOE3 (FLOE3)
AT2G21330	AT2G21330.1	Plastid isoform of fructose-bisphosphate aldolase 1. This is one of three plastid isoforms and arose with FBA2; from a recent duplication. Functions in carbon fixation via Calvin-Benson-Bassham cycle.	protein_coding	FRUCTOSE-BISPHOSPHATE ALDOLASE 1 (FBA1)	FRUCTOSE-BISPHOSPHATE ALDOLASE 1 (FBA1); (ATFBA1)
AT1G51580	AT1G51580.1	RNA-binding KH domain-containing protein;(source:Araport11)	protein_coding	(ATKH4)	(ATKH4)
AT1G31760	AT1G31760.1	SWIB/MDM2 domain superfamily protein;(source:Araport11)	protein_coding	SWI/SNF PROTEIN COMPLEX B5 (SWIB5)	SWI/SNF PROTEIN COMPLEX B5 (SWIB5)
AT1G51980	AT1G51980.1	Insulinase (Peptidase family M16) protein;(source:Araport11)	protein_coding
AT1G20760	AT1G20760.1	EH domain containing protein.	protein_coding	ARABIDOPSIS THALIANA EH DOMAIN CONTAINING PROTEIN 1 (ATEH1)	ARABIDOPSIS THALIANA EH DOMAIN CONTAINING PROTEIN 1 (ATEH1)
AT1G21630	AT1G21630.2	TPLATE Adaptor complex subunit.	protein_coding	ARABIDOPSIS THALIANA EH DOMAIN CONTAINING PROTEIN 2 (ATEH2)	ARABIDOPSIS THALIANA EH DOMAIN CONTAINING PROTEIN 2 (ATEH2)
PafA|BAIT|BAIT_LABEL	PafA enzyme
FLAGPUP|SUB|SUB_LABEL	FLAG-Pup(E)

## Sheet: mock and ind LFQ (SDS elu)
Log2 transformed LFQ of proteins detected in samples from biotin or mock treatment, proteins were eluted by SDS.
SDS_ind_rep1	SDS_ind_rep2	SDS_ind_rep3	SDS_mock_rep1	SDS_mock_rep2	SDS_mock_rep3	C: Only identified by site	C: Reverse	C: Potential contaminant	C: Taxonomy IDs	N: Peptides	N: Razor + unique peptides	N: Unique peptides	N: Sequence coverage [%]	N: Unique + razor sequence coverage [%]	N: Unique sequence coverage [%]	N: Mol. weight [kDa]	N: Q-value	N: Score	N: Intensity	N: iBAQ peptides	N: MS/MS count	T: Protein IDs	T: Majority protein IDs	T: id
21.4813	23.5591	NaN	20.4968	NaN	NaN				-1	1	1	1	13.9	13.9	13.9	16.543	0	14.534	29295000	6	7	AT1G01470.1	AT1G01470.1	3
23.1509	23.6199	23.77	23.6299	23.3336	24.5391				-1	25	25	25	13.5	13.5	13.5	263.76	0	96.502	278630000	104	41	AT1G02080.2;AT1G02080.3;AT1G02080.1	AT1G02080.2;AT1G02080.3;AT1G02080.1	6
22.7864	23.1429	NaN	NaN	NaN	23.0037				-1	2	2	2	14	14	14	17.458	0	6.0323	50804000	10	5	AT1G02140.1	AT1G02140.1	7
25.6006	25.4376	25.1138	25.1721	NaN	25.8692				-1	7	7	3	36	36	24.3	24.606	0	48.008	560720000	6	20	AT1G02780.1	AT1G02780.1	10
22.8558	23.4742	23.235	22.958	NaN	22.935				-1	6	6	6	34.6	34.6	34.6	23.486	0	17.454	103390000	13	14	AT1G02930.1;AT1G02930.2;AT1G02920.1	AT1G02930.1;AT1G02930.2;AT1G02920.1	13
29.8896	29.7604	29.8218	29.2417	30.2884	29.6175				-1	37	37	37	70.2	70.2	70.2	80.45	0	323.31	44365000000	39	358	AT1G03090.2;AT1G03090.1	AT1G03090.2;AT1G03090.1	14
24.2812	24.3713	24.4183	24.2045	NaN	NaN				-1	5	5	5	64.5	64.5	64.5	10.694	0	22.43	241940000	5	16	AT1G03330.1	AT1G03330.1	17
26.5169	26.4063	26.6054	26.6189	26.3888	27.0235				-1	17	17	17	28.5	28.5	28.5	88.837	0	158.93	1763900000	20	66	AT1G03530.1	AT1G03530.1	18
23.6752	23.6013	23.5254	23.4361	NaN	23.3953				-1	7	7	7	21.7	21.7	21.7	50.853	0	24.478	174530000	19	23	AT1G04170.2;AT1G04170.1;AT4G18330.1;AT2G18720.2;AT2G18720.1;AT4G18330.2	AT1G04170.2;AT1G04170.1	20
27.1795	26.0637	25.9086	26.1073	26.2906	24.6687				-1	7	7	2	62.3	62.3	8.6	17.058	0	53.845	1269100000	7	45	AT1G04270.2;AT1G04270.1;AT5G43640.1;AT5G09500.1	AT1G04270.2;AT1G04270.1	21
25.1966	26.0002	24.983	25.6423	24.3249	25.9052				-1	11	5	5	46.1	26.2	26.2	35.571	0	40.706	561970000	18	29	AT1G04410.1;AT5G56720.1	AT1G04410.1	22
26.7519	26.7304	26.6697	26.4339	26.5502	26.8316				-1	6	6	6	63.2	63.2	63.2	13.406	0	33.884	1206200000	8	26	AT3G04400.2;AT2G33370.2;AT3G04400.1;AT2G33370.1;AT1G04480.1	AT3G04400.2;AT2G33370.2;AT3G04400.1;AT2G33370.1;AT1G04480.1	23
22.5879	22.5792	22.4566	NaN	NaN	NaN				-1	5	5	4	9	9	6.9	56.881	0	8.8612	51890000	26	11	AT1G04510.2;AT1G04510.1	AT1G04510.2;AT1G04510.1	24
23.3589	23.5579	23.2345	23.1912	NaN	23.6253				-1	6	6	6	17.7	17.7	17.7	36.538	0	9.3544	107810000	19	17	AT1G04690.1	AT1G04690.1	25
23.9984	23.7755	23.7165	23.3602	NaN	23.3388				-1	16	6	6	21.4	6.8	6.8	108.86	0	15.018	127340000	41	16	AT1G04810.1	AT1G04810.1	27
23.578	NaN	23.8165	23.841	NaN	24.1066				-1	6	6	6	25.7	25.7	25.7	38.951	0	50.847	138320000	16	18	AT1G05805.1	AT1G05805.1	34
NaN	22.0136	NaN	22.5015	NaN	21.9094				-1	3	3	3	13	13	13	36.496	0	12.467	24763000	17	8	AT1G06130.2;AT1G06130.1	AT1G06130.2;AT1G06130.1	38
24.3863	23.8654	24.127	24.0669	22.6549	23.6868				-1	30	30	30	39.5	39.5	39.5	110.44	0	114.77	521120000	50	64	AT1G06220.3;AT1G06220.2;AT1G06220.1;AT5G25230.2;AT5G25230.1	AT1G06220.3;AT1G06220.2;AT1G06220.1;AT5G25230.2;AT5G25230.1	40
23.062	23.2991	23.246	23.4748	NaN	NaN				-1	16	16	16	25	25	25	96.687	0	48.525	173610000	46	22	AT1G06410.3;AT1G06410.2;AT1G06410.1;AT1G68020.1;AT1G68020.3;AT1G68020.2;AT2G18700.1	AT1G06410.3;AT1G06410.2;AT1G06410.1	41
NaN	22.9928	22.7729	23.0122	NaN	22.9955				-1	9	9	9	11	11	11	112.12	0	25.991	85722000	50	14	AT1G06950.1	AT1G06950.1	44
22.6912	23.1003	NaN	23.0641	NaN	23.4209				-1	6	6	6	34.2	34.2	34.2	25.601	0	33.884	80872000	13	16	AT1G07140.1;AT2G30060.1	AT1G07140.1	46
23.5287	23.2992	23.9009	23.1629	23.8031	23.7631				-1	8	8	6	17	17	12.7	53.587	0	19.473	131320000	22	22	AT1G07360.1;AT5G07060.2;AT5G07060.1	AT1G07360.1	50
25.7755	25.3381	25.3567	25.3741	26.6146	25.9881				-1	6	6	6	51.5	51.5	51.5	11.409	0	22.812	478730000	6	26	AT5G59970.2;AT5G59970.1;AT5G59690.1;AT3G53730.1;AT3G46320.1;AT3G45930.1;AT2G28740.1;AT1G07820.2;AT1G07820.1;AT1G07660.1;AT1G07660.2	AT5G59970.2;AT5G59970.1;AT5G59690.1;AT3G53730.1;AT3G46320.1;AT3G45930.1;AT2G28740.1;AT1G07820.2;AT1G07820.1;AT1G07660.1;AT1G07660.2	53
24.9348	24.7707	24.8626	24.9127	24.4633	25.3077				-1	14	14	14	29.3	29.3	29.3	65.816	0	93.827	447550000	25	48	AT1G07705.2;AT1G07705.1	AT1G07705.2;AT1G07705.1	55
24.3025	24.3394	24.0459	24.4977	24.3282	24.6601				-1	9	9	9	35.4	35.4	35.4	38.31	0	40.097	253580000	18	21	AT1G07750.1;AT2G28680.1	AT1G07750.1	56
27.2425	27.2256	27.1842	27.1107	27.2689	26.9753				-1	10	10	3	74.6	74.6	23.8	14.804	0	36.472	1682100000	8	30	AT5G59850.1;AT1G07770.3;AT1G07770.2;AT1G07770.1;AT2G39590.1	AT5G59850.1;AT1G07770.3;AT1G07770.2;AT1G07770.1	57
25.6874	26.0211	25.7645	26.169	25.6024	25.4057				-1	12	12	11	55.4	55.4	55.4	27.52	0	71.415	990330000	14	50	AT1G07890.6;AT1G07890.8;AT1G07890.7;AT1G07890.5;AT1G07890.4;AT1G07890.3;AT1G07890.2;AT1G07890.1	AT1G07890.6;AT1G07890.8;AT1G07890.7;AT1G07890.5;AT1G07890.4;AT1G07890.3;AT1G07890.2;AT1G07890.1	60
29.8828	29.8524	29.7071	29.9969	29.1864	30.2391				-1	29	29	29	60.1	60.1	60.1	49.502	0	202.31	26649000000	25	225	AT5G60390.3;AT5G60390.2;AT5G60390.1;AT1G07940.4;AT1G07940.3;AT1G07940.2;AT1G07940.1;AT1G07930.1;AT1G07920.1;AT1G07930.2;AT1G35550.1	AT5G60390.3;AT5G60390.2;AT5G60390.1;AT1G07940.4;AT1G07940.3;AT1G07940.2;AT1G07940.1;AT1G07930.1;AT1G07920.1;AT1G07930.2	61
23.6999	NaN	24.2696	23.6077	24.0584	NaN				-1	3	3	3	26.7	26.7	26.7	16.565	0	14.277	104110000	8	10	AT1G07960.4;AT1G07960.3;AT1G07960.2;AT1G07960.1	AT1G07960.4;AT1G07960.3;AT1G07960.2;AT1G07960.1	62
NaN	22.7277	24.0143	21.9857	NaN	21.3808				-1	8	8	8	12	12	12	123.45	0	32.114	77793000	53	16	AT1G09620.1	AT1G09620.1	73
25.1445	25.2855	25.1714	25.6511	24.9659	25.8437				-1	13	13	7	35.3	35.3	19.6	46.66	0	79.609	943500000	17	62	AT1G09640.1;AT1G09640.2	AT1G09640.1;AT1G09640.2	74
23.6712	23.7656	24.0394	23.8296	NaN	23.7288				-1	15	9	9	43.8	27.8	27.8	60.579	0	36.093	170200000	31	20	AT1G09780.1	AT1G09780.1	76
23.599	23.5538	NaN	23.123	NaN	NaN				-1	4	4	4	21.1	21.1	21.1	21.04	0	18.749	82974000	11	10	AT1G10200.1;AT1G10200.2	AT1G10200.1;AT1G10200.2	79
23.0956	23.1158	23.1443	23.3597	NaN	23.658				-1	13	13	13	14	14	14	102.09	0	35.24	172000000	40	35	AT1G10270.1	AT1G10270.1	80
26.6327	26.8295	26.6573	26.5246	26.3947	26.1437				-1	8	8	8	47.5	47.5	47.5	20.693	0	59.271	1721200000	10	43	AT5G14670.3;AT5G14670.2;AT1G10630.1;AT3G62290.3;AT3G62290.2;AT3G62290.1;AT2G47170.3;AT2G47170.2;AT2G47170.1;AT1G70490.7;AT1G70490.6;AT1G70490.5;AT1G70490.4;AT1G70490.3;AT1G70490.2;AT1G70490.1;AT1G23490.1;AT1G10630.2;AT5G14670.1	AT5G14670.3;AT5G14670.2;AT1G10630.1;AT3G62290.3;AT3G62290.2;AT3G62290.1;AT2G47170.3;AT2G47170.2;AT2G47170.1;AT1G70490.7;AT1G70490.6;AT1G70490.5;AT1G70490.4;AT1G70490.3;AT1G70490.2;AT1G70490.1;AT1G23490.1;AT1G10630.2;AT5G14670.1	84
23.787	24.0314	24.3828	23.8109	23.864	23.8761				-1	8	8	8	28.8	28.8	28.8	38.372	0	35.616	244260000	16	31	AT1G10840.1;AT1G10840.2	AT1G10840.1;AT1G10840.2	86
24.1536	24.2501	23.9207	24.3593	NaN	24.3786				-1	11	11	11	27.1	27.1	27.1	61.687	0	75.805	283660000	26	33	AT1G11580.1;AT1G11580.2;AT3G10720.1;AT1G53830.1;AT4G15980.1;AT3G49220.3;AT5G53370.2;AT3G10720.2;AT3G49220.1;AT3G14310.1;AT1G02810.1;AT5G53370.1;AT4G33220.2;AT1G23200.1;AT2G26440.1;AT4G33220.1;AT3G60730.1;AT4G02320.1;AT4G15980.2	AT1G11580.1;AT1G11580.2	89
23.7686	23.9336	23.2901	23.776	NaN	23.5006				-1	7	7	7	28.3	28.3	28.3	31.928	0	48.147	159400000	12	15	AT1G11840.4;AT1G11840.3;AT1G11840.2;AT1G11840.1;AT1G11840.6;AT1G11840.5;AT1G67280.2;AT1G67280.1	AT1G11840.4;AT1G11840.3;AT1G11840.2;AT1G11840.1;AT1G11840.6;AT1G11840.5	91
23.2254	23.1378	22.8932	22.7083	NaN	22.823				-1	5	5	2	39.2	39.2	18.9	16.517	0	31.412	86824000	11	15	AT1G12310.1	AT1G12310.1	98
24.1809	24.1981	24.3704	24.4478	23.2336	24.6158				-1	28	28	28	53.6	53.6	53.6	59.324	0	73.431	634720000	37	89	AT1G13020.1;AT3G26400.1	AT1G13020.1	102
26.2173	26.284	26.2053	26.5743	NaN	26.1259				-1	25	2	2	76.9	10.4	10.4	36.913	0	50.133	622770000	21	10	AT1G13440.1;AT1G13440.2	AT1G13440.1;AT1G13440.2	105
26.2576	26.307	26.2996	26.2155	26.135	26.2207				-1	18	18	18	65.4	65.4	65.4	46.803	0	225.27	2375100000	20	98	AT1G13730.2;AT1G13730.1	AT1G13730.2;AT1G13730.1	107
25.6022	25.6604	25.7291	25.8411	NaN	26.2159				-1	11	5	3	47.7	20	9.5	24.917	0	16.572	441280000	11	15	AT1G14320.1;AT1G14320.2	AT1G14320.1;AT1G14320.2	108
24.29	24.4576	24.3229	24.1424	23.9295	24.4903				-1	7	5	5	33.5	25.9	25.9	29.058	0	42.027	276590000	14	21	AT1G14410.1	AT1G14410.1	110
23.921	23.9884	24.1212	24.143	23.0349	24.4994				-1	21	21	21	34.5	34.5	34.5	87.593	0	105.53	627120000	34	72	AT1G14650.3;AT1G14650.2;AT1G14650.1;AT1G14640.2;AT1G14640.1	AT1G14650.3;AT1G14650.2;AT1G14650.1	113
24.7162	25.0818	24.8893	24.7813	24.2215	25.5931				-1	11	11	11	38.7	38.7	38.7	40.745	0	74.962	533710000	16	40	AT1G14810.1;AT1G14810.2	AT1G14810.1;AT1G14810.2	115
24.5515	24.768	24.3218	24.5368	24.5241	25.221				-1	9	9	9	72.4	72.4	72.4	10.812	0	22.164	424460000	7	31	AT1G14980.1;AT1G14980.2	AT1G14980.1;AT1G14980.2	117
19.4902	20.2553	NaN	20.7689	NaN	20.6144				-1	3	3	3	11.1	11.1	11.1	36.502	0	22.165	10116000	19	10	AT1G15340.2;AT1G15340.1	AT1G15340.2;AT1G15340.1	120
22.522	22.8212	22.4439	23.1462	NaN	23.5552				-1	6	6	6	10.4	10.4	10.4	80.819	0	23.374	90877000	27	16	AT1G15690.1;AT1G15690.2	AT1G15690.1;AT1G15690.2	125
26.4387	26.6634	26.7205	26.1377	NaN	26.4791				-1	6	6	3	63.9	63.9	46.5	15.377	0	36.676	1146300000	9	21	AT1G15930.2;AT1G15930.1	AT1G15930.2;AT1G15930.1	128
28.0163	28.0338	28.047	28.2606	28.0595	28.5735				-1	56	40	39	61.7	49.4	48.7	126.78	0	323.31	11580000000	46	260	AT1G16270.3;AT1G16270.2;AT1G16270.1;AT5G57610.1	AT1G16270.3;AT1G16270.2;AT1G16270.1	129
NaN	23.0248	NaN	23.3458	NaN	23.3487				-1	9	9	4	19.9	19.9	9.2	59.82	0	38.171	78501000	29	12	AT1G17290.1;AT1G72330.3;AT5G62390.1	AT1G17290.1;AT1G72330.3	135
25.2894	25.3086	25.3546	25.1543	25.3502	25.8618				-1	9	9	9	16.3	16.3	16.3	74.805	0	60.314	696380000	17	45	AT1G17440.2;AT1G17440.1	AT1G17440.2;AT1G17440.1	136
25.9221	25.7457	25.9279	25.7043	25.5595	25.9848				-1	15	12	12	50.5	43.4	43.4	35.747	0	73.965	1140900000	20	48	AT1G18080.1	AT1G18080.1	140
25.2679	25.1602	25.3361	25.3299	24.6363	25.9529				-1	20	20	20	67.1	67.1	67.1	48.936	0	220.2	1128600000	25	85	AT1G18450.1;AT1G73910.2;AT1G73910.1;AT1G73910.3	AT1G18450.1	142
24.171	24.8148	24.2314	24.7306	NaN	24.3274				-1	15	5	5	48.9	20.6	20.6	26.152	0	8.3916	168630000	12	20	AT1G18540.1	AT1G18540.1	143
24.4432	24.3658	24.4389	24.5345	NaN	24.6913				-1	5	5	4	17.9	17.9	15.2	37.051	0	23.613	265980000	18	20	AT1G19660.1;AT1G19660.2;AT1G19660.3	AT1G19660.1;AT1G19660.2;AT1G19660.3	148
23.9237	24.3675	24.532	24.237	22.1214	24.417				-1	14	14	14	26.3	26.3	26.3	65.395	0	57.992	504800000	24	61	AT1G20110.1	AT1G20110.1	152
24.5877	24.2315	24.3183	24.1976	23.1598	23.9811				-1	15	15	7	37.3	37.3	20.3	55.582	0	82.577	448300000	33	51	AT1G20200.1	AT1G20200.1	154
24.3438	24.0244	24.5577	24.1431	NaN	24.3605				-1	7	7	7	28.3	28.3	28.3	33.763	0	42.079	269770000	11	28	AT1G20220.1	AT1G20220.1	155
24.795	24.668	24.4626	24.5124	NaN	23.0697				-1	3	3	2	26	26	18.3	14.237	0	9.9125	142770000	8	13	AT1G20580.1;AT1G20600.1	AT1G20580.1	158
22.2938	22.1954	23.0645	NaN	NaN	NaN				-1	6	6	6	11.5	11.5	11.5	72.955	0	13.29	53836000	39	10	AT1G20670.1	AT1G20670.1	159
25.7719	26.9494	26.9949	19.6234	NaN	19.5286				-1	43	42	42	51.1	50.4	50.4	109.82	0	323.31	3695100000	54	125	AT1G20760.1	AT1G20760.1	160
22.9048	22.8758	22.6154	22.9457	NaN	23.0339				-1	18	17	17	9.8	9.4	9.4	247.1	0	37.752	165770000	114	35	AT1G20960.1;AT1G20960.2;AT2G42270.1	AT1G20960.1;AT1G20960.2	161
26.8769	26.8648	26.8676	20.5686	NaN	20.0909				-1	60	60	59	57.4	57.4	56.9	129.45	0	323.31	5881800000	62	175	AT1G21630.3;AT1G21630.1;AT1G21630.4;AT1G21630.2;AT1G28490.3;AT1G28490.2	AT1G21630.3;AT1G21630.1;AT1G21630.4;AT1G21630.2	162
24.1674	24.2854	24.6577	24.6095	22.937	24.7182				-1	16	16	16	27.9	27.9	27.9	88.249	0	121.66	451040000	33	44	AT1G21700.1	AT1G21700.1	164
21.7992	21.8975	NaN	22.3657	NaN	22.7986				-1	6	6	4	15.8	15.8	11.3	54.158	0	20.493	48543000	33	14	AT1G21750.2;AT1G21750.1	AT1G21750.2;AT1G21750.1	166
26.6819	26.773	26.5835	26.2405	26.3456	25.9112				-1	9	9	9	52.6	52.6	52.6	17.545	0	93.865	1714000000	8	46	AT4G09800.1;AT1G34030.1;AT1G22780.1	AT4G09800.1;AT1G34030.1;AT1G22780.1	171
24.4359	24.687	NaN	24.6016	NaN	24.9482				-1	3	3	3	22.8	22.8	22.8	12.394	0	5.1356	131670000	8	13	AT1G22840.1;AT1G22840.2;AT4G10040.1	AT1G22840.1;AT1G22840.2;AT4G10040.1	172
23.022	NaN	23.2079	22.9472	NaN	24.0547				-1	8	8	8	33.9	33.9	33.9	39.105	0	37.533	100530000	18	13	AT1G22920.2;AT1G22920.1;AT1G71230.1	AT1G22920.2;AT1G22920.1	174
22.9111	22.9641	22.7856	23.2755	22.6162	23.8676				-1	9	9	4	21.3	21.3	11.5	63.17	0	39.068	142070000	36	21	AT1G23190.1	AT1G23190.1	178
22.4633	22.712	22.5359	22.6953	NaN	22.7232				-1	11	11	11	10.4	10.4	10.4	177.64	0	38.353	63099000	63	18	AT1G23230.2;AT1G23230.3;AT1G23230.1	AT1G23230.2;AT1G23230.3;AT1G23230.1	179
25.0044	24.8157	24.8542	24.6234	24.4802	NaN				-1	9	9	9	30.4	30.4	30.4	35.759	0	60.047	351490000	15	21	AT1G23280.1	AT1G23280.1	180
27.3529	27.4197	26.9838	27.3846	26.0866	27.1585				-1	8	8	8	49.3	49.3	49.3	16.292	0	23.196	1859800000	8	30	AT1G23290.1;AT1G70600.1	AT1G23290.1;AT1G70600.1	181
22.703	NaN	22.8719	22.2059	NaN	22.5233				-1	9	9	7	13.7	13.7	11.3	95.105	0	40.574	76757000	39	17	AT1G23900.3;AT1G23900.2;AT1G23900.1;AT1G23935.3;AT1G23935.2;AT1G23935.1	AT1G23900.3;AT1G23900.2;AT1G23900.1	183
23.2946	23.3822	23.0475	23.4882	NaN	23.5791				-1	12	12	9	32.8	32.8	24.4	43.358	0	33.806	186080000	20	32	AT1G24180.1	AT1G24180.1	185
27.1368	27.2357	27.283	27.2814	26.8708	27.4794				-1	82	82	62	73.2	73.2	60.7	166.27	0	323.31	11574000000	77	419	AT1G24300.1;AT1G24300.2;AT1G24300.3	AT1G24300.1;AT1G24300.2;AT1G24300.3	188
23.2928	23.4563	23.0997	23.4008	NaN	23.8966				-1	4	4	4	14.7	14.7	14.7	33.548	0	18.317	130510000	16	16	AT1G24360.1	AT1G24360.1	189
25.1494	25.2665	25.12	25.0559	24.8189	25.5015				-1	14	14	14	31.6	31.6	31.6	59.384	0	99.879	742390000	30	57	AT1G24510.1;AT1G24510.2;AT1G24510.3;AT1G67760.1	AT1G24510.1;AT1G24510.2;AT1G24510.3	190
28.1698	28.0198	28.3238	28.7172	28.5576	28.6918				-1	19	19	19	37.2	37.2	37.2	63.66	0	233.18	8772800000	17	119	AT1G26110.2;AT1G26110.1	AT1G26110.2;AT1G26110.1	192
27.2232	27.4358	27.0413	27.354	26.5694	27.6649				-1	12	12	9	83	83	66	17.14	0	198.18	2742900000	10	71	AT1G26630.1;AT1G26630.2	AT1G26630.1;AT1G26630.2	195
26.9175	27.1265	26.8265	26.3183	27.1625	27.2308				-1	4	4	2	33.3	33.3	16.7	13.705	0	8.7279	1183600000	4	21	AT1G26880.1;AT1G26880.2	AT1G26880.1;AT1G26880.2	196
25.0256	24.9038	25.1883	25.4246	25.252	25.7734				-1	18	18	18	64.8	64.8	64.8	46.018	0	286.36	1197000000	23	83	AT1G27090.1	AT1G27090.1	197
26.3909	26.4396	26.4656	26.527	26.3655	26.7321				-1	77	57	57	69.2	57.8	57.8	165.43	0	323.31	5925000000	81	277	AT1G27430.1;AT1G27430.3;AT1G27430.2	AT1G27430.1;AT1G27430.3;AT1G27430.2	200
23.8031	24.4387	23.6167	24.3277	NaN	NaN				-1	5	5	5	40.4	40.4	40.4	19.739	0	24.303	169660000	10	20	AT1G27450.4;AT1G27450.2;AT1G27450.1;AT1G27450.3	AT1G27450.4;AT1G27450.2;AT1G27450.1;AT1G27450.3	201
23.5291	23.16	23.4783	23.5118	NaN	23.9106				-1	8	8	8	12.4	12.4	12.4	96.421	0	34.433	140890000	39	22	AT1G27752.1;AT1G27752.2	AT1G27752.1;AT1G27752.2	204
22.2452	22.3602	22.6232	22.9945	NaN	22.4107				-1	11	11	10	22.1	22.1	20.4	59.8	0	25.96	82138000	35	24	AT1G29030.2;AT1G29030.1	AT1G29030.2;AT1G29030.1	207
24.4072	24.5993	24.8647	24.3014	NaN	24.2976				-1	15	15	15	44.9	44.9	44.9	46.749	0	54.859	437130000	23	42	AT1G29150.2;AT1G29150.1	AT1G29150.2;AT1G29150.1	208
24.1432	23.9276	24.2418	24.5269	NaN	24.8125				-1	10	10	10	16.8	16.8	16.8	90.887	0	62.288	375480000	22	35	AT1G29370.1;AT1G29350.1;AT1G29370.2	AT1G29370.1;AT1G29350.1;AT1G29370.2	210
23.1439	23.0137	23.6139	22.9516	NaN	NaN				-1	7	7	7	10.9	10.9	10.9	88.211	0	17.795	99843000	32	17	AT1G29400.3;AT1G29400.2;AT1G29400.1;AT3G26120.1	AT1G29400.3;AT1G29400.2;AT1G29400.1	211
22.4963	22.5819	22.6987	22.9779	NaN	NaN				-1	7	7	7	9.3	9.3	9.3	81.943	0	15.572	54260000	43	14	AT1G29880.1;AT3G44740.5;AT3G44740.4;AT3G44740.3;AT3G44740.1	AT1G29880.1	212
24.0665	NaN	23.6116	24.9693	NaN	NaN				-1	10	5	5	45	27.3	27.3	25.132	0	11.839	146980000	11	12	AT1G30230.1;AT1G30230.2	AT1G30230.1;AT1G30230.2	217
28.7827	28.6141	28.5816	29.165	28.9737	29.3314				-1	18	18	18	58.1	58.1	58.1	42.318	0	180.88	11490000000	22	126	AT1G30480.1	AT1G30480.1	218
24.1548	23.8142	23.8896	24.0304	NaN	24.1218				-1	8	8	8	27.4	27.4	27.4	44.471	0	29.622	221680000	25	26	AT1G30580.1	AT1G30580.1	220
23.7065	23.3996	23.8754	23.5929	NaN	23.7716				-1	10	10	10	16.5	16.5	16.5	80.402	0	44.742	148160000	37	19	AT1G30680.1	AT1G30680.1	222
NaN	23.876	24.0079	23.2581	NaN	24.2336				-1	8	8	2	37.7	37.7	12.3	31.584	0	33.25	158330000	14	17	AT1G32380.2;AT1G32380.1	AT1G32380.2;AT1G32380.1	229
23.6049	23.2624	23.6767	23.5009	23.7686	24.2393				-1	9	9	9	21.3	21.3	21.3	52.824	0	33.005	208240000	21	27	AT1G32500.1	AT1G32500.1	230
23.8601	24.0483	23.9859	23.6776	NaN	22.6404				-1	4	4	4	24.9	24.9	24.9	26.024	0	24.282	119440000	13	17	AT1G32580.1	AT1G32580.1	231
27.1813	27.2742	27.6953	27.0737	27.045	26.5673				-1	15	15	10	66.5	66.5	52.6	22.017	0	115.34	3338500000	10	68	AT1G33140.1;AT1G33120.1	AT1G33140.1;AT1G33120.1	232
24.1578	23.8026	23.9736	23.8114	23.9465	23.7904				-1	5	5	5	20.9	20.9	20.9	36.392	0	15.964	159590000	15	22	AT1G33780.1	AT1G33780.1	235
30.1588	29.9557	29.9422	30.1576	29.7068	30.6196				-1	34	34	34	55.7	55.7	55.7	68.958	0	323.31	49159000000	32	325	AT1G34220.2;AT1G34220.1	AT1G34220.2;AT1G34220.1	236
24.5631	24.5102	24.3865	24.5979	NaN	25.1617				-1	12	10	10	37.4	32	32	48.306	0	52.99	362790000	23	38	AT1G34430.1	AT1G34430.1	238
24.4834	24.4704	25.1016	24.6211	NaN	25.1343				-1	10	9	7	49	49	39	28.526	0	77.022	326550000	11	23	AT1G35460.1;AT1G35460.2;AT5G33210.1	AT1G35460.1;AT1G35460.2	240
22.7741	NaN	22.181	22.1354	NaN	NaN				-1	2	2	2	6.8	6.8	6.8	24.038	0.00056786	2.8834	27300000	13	9	AT1G35680.1	AT1G35680.1	244
NaN	22.7694	22.0076	22.0426	NaN	NaN				-1	3	3	3	13.9	13.9	13.9	36.203	0	10.701	29158000	21	8	AT1G35720.1	AT1G35720.1	245
27.9476	27.748	27.997	27.4061	28.6423	27.5918				-1	119	77	77	63.4	43.6	43.6	251.38	0	323.31	19339000000	123	469	AT1G36160.2;AT1G36160.1	AT1G36160.2;AT1G36160.1	247
28.6788	28.453	28.7246	28.0913	29.6979	28.2649				-1	130	130	88	64.6	64.6	45.4	262.73	0	323.31	52087000000	125	866	AT1G36180.1;AT1G36180.2;AT1G36180.3	AT1G36180.1	248
23.1083	23.8444	23.6652	23.1816	NaN	NaN				-1	9	9	9	12.4	12.4	12.4	102.84	0	19.784	97122000	46	15	AT1G37130.1	AT1G37130.1	251
24.8103	24.856	25.0029	24.6033	25.0772	24.56				-1	5	5	2	54.1	54.1	28.8	12.799	0	36.378	307460000	5	26	AT1G41880.1;AT1G41880.2;AT3G55750.1	AT1G41880.1;AT1G41880.2;AT3G55750.1	253
NaN	22.7615	22.6019	22.6794	NaN	22.3819				-1	8	8	8	12.1	12.1	12.1	89.455	0	32.408	53746000	38	14	AT1G42440.1	AT1G42440.1	255
24.3474	24.5371	24.6055	24.3255	24.3477	24.9514				-1	9	9	5	24.6	24.6	14.8	47.659	0	34.012	308800000	28	32	AT1G42970.1	AT1G42970.1	257
27.3867	27.4522	27.2887	27.4759	26.4032	27.7335				-1	25	25	25	48.3	48.3	48.3	44.559	0	143.59	8457000000	25	150	AT1G43170.9;AT1G43170.8;AT1G43170.7;AT1G43170.6;AT1G43170.5;AT1G43170.3;AT1G43170.2;AT1G43170.1;AT1G43170.4;AT1G61580.1	AT1G43170.9;AT1G43170.8;AT1G43170.7;AT1G43170.6;AT1G43170.5;AT1G43170.3;AT1G43170.2;AT1G43170.1;AT1G43170.4	259
22.9519	22.9302	23.1418	22.9523	NaN	NaN				-1	6	6	6	22.3	22.3	22.3	48.02	0	34.795	77231000	19	13	AT1G43190.3;AT1G43190.2;AT1G43190.1	AT1G43190.3;AT1G43190.2;AT1G43190.1	260
23.3709	NaN	23.2799	24.0373	NaN	24.0053				-1	10	10	10	35.2	35.2	35.2	37.791	0	40.154	127200000	15	20	AT1G43700.1	AT1G43700.1	263
25.2804	25.3217	25.2634	24.9449	24.9243	24.1343				-1	11	10	10	36.6	34.5	34.5	44.155	0	46.527	540880000	22	43	AT1G43800.1	AT1G43800.1	264
23.7915	23.7297	23.8078	23.5768	22.7108	24.2365				-1	15	15	15	25.4	25.4	25.4	96.231	0	78.86	312960000	30	44	AT1G43850.2;AT1G43850.1	AT1G43850.2;AT1G43850.1	265
24.6118	24.5109	24.7195	24.4519	23.8681	24.895				-1	17	4	4	49.1	15	15	35.8	0	32.47	257090000	20	16	AT1G48630.1	AT1G48630.1	278
25.1294	24.8763	25.1423	24.8459	25.0702	24.5131				-1	8	8	8	48.7	48.7	48.7	21.922	0	55.477	455660000	8	28	AT1G48830.2;AT1G48830.1	AT1G48830.2;AT1G48830.1	279
25.5107	25.64	25.4959	25.9623	25.2199	26.3227				-1	20	20	20	35.2	35.2	35.2	58.773	0	73.986	1814900000	31	89	AT1G48920.1;AT3G18610.2;AT3G18610.3;AT3G18610.1	AT1G48920.1	283
24.355	24.334	24.0357	24.5988	24.0766	24.7658				-1	20	7	4	54.4	27.6	20.4	41.876	0	60.53	358050000	21	27	AT3G18780.3;AT3G18780.2;AT1G49240.1;AT3G18780.1	AT3G18780.3;AT3G18780.2;AT1G49240.1;AT3G18780.1	286
30.9437	30.8192	30.7091	30.6222	31.402	30.9699				-1	16	14	12	46.5	42.9	40.4	48.483	0	323.31	43261000000	13	182	AT1G49600.1;AT1G49600.3;AT1G49600.2	AT1G49600.1;AT1G49600.3;AT1G49600.2	288
26.51	26.3337	26.6006	26.5833	26.1399	26.914				-1	29	25	24	54.8	52.5	48.9	72.779	0	208.29	2816200000	31	91	AT1G49760.2;AT1G49760.1	AT1G49760.2;AT1G49760.1	289
23.7985	23.57	23.8722	24.0591	23.7938	24.4933				-1	25	25	25	28.5	28.5	28.5	110.49	0	83.537	363820000	54	55	AT1G50200.1;AT1G50200.2	AT1G50200.1;AT1G50200.2	291
22.9381	23.2605	22.453	23.5505	21.8855	23.8429				-1	11	11	11	23.3	23.3	23.3	67.801	0	57.034	188250000	28	33	AT1G50480.1;AT2G12280.1	AT1G50480.1	294
25.7008	25.6936	25.8226	26.1849	25.8594	26.3235				-1	13	13	13	48.5	48.5	48.5	41.716	0	122.74	960930000	18	52	AT1G51140.1	AT1G51140.1	303
23.4328	23.4051	23.3825	23.6238	NaN	23.8519				-1	8	6	6	21.9	19.9	19.9	44.357	0	19.61	110600000	27	13	AT1G51380.1;AT1G51380.2;AT1G51380.4;AT1G51380.3	AT1G51380.1;AT1G51380.2;AT1G51380.4;AT1G51380.3	304
25.0222	24.1702	24.3128	24.9178	NaN	24.5201				-1	9	9	8	34.4	34.4	31.6	43.582	0	52.086	309880000	18	23	AT1G51560.1	AT1G51560.1	307
23.4041	23.7553	23.6413	23.8596	23.7784	23.6947				-1	10	10	10	18.4	18.4	18.4	67.114	0	33.652	236200000	34	33	AT1G51580.1	AT1G51580.1	308
28.387	28.3011	28.4363	28.2991	28.6294	28.9162				-1	10	10	8	45	45	41.4	33.129	0	120.14	6490800000	10	68	AT1G51600.2;AT1G51600.1	AT1G51600.2;AT1G51600.1	309
NaN	NaN	22.539	22.4063	NaN	22.5201				-1	5	5	5	13.4	13.4	13.4	40.116	0	9.2811	49835000	22	13	AT1G51660.1;AT3G21220.2;AT3G21220.1	AT1G51660.1	310
23.5915	23.7476	23.8241	23.7922	NaN	24.0352				-1	10	10	9	28.5	28.5	26.9	56.934	0	52.782	199000000	25	30	AT1G51690.4;AT1G51690.1;AT1G51690.2;AT1G51690.5;AT1G51690.3	AT1G51690.4;AT1G51690.1;AT1G51690.2;AT1G51690.5;AT1G51690.3	311
23.6643	23.8653	23.9087	24.3647	23.5413	23.9383				-1	13	13	13	30.7	30.7	30.7	53.695	0	45.318	317950000	23	34	AT1G51710.1;AT1G51710.2;AT3G21280.2;AT3G21280.1	AT1G51710.1;AT1G51710.2	312
23.8595	23.8068	23.9189	23.9558	NaN	24.4161				-1	14	14	14	40.2	40.2	40.2	54.401	0	76.856	338100000	24	40	AT1G51980.1;AT1G51980.2;AT3G16480.1	AT1G51980.1;AT1G51980.2	314
25.7507	25.6449	24.6731	25.8692	25.9113	26.1334				-1	4	4	4	37.9	37.9	37.9	10.771	0	10.579	331940000	4	16	AT3G16080.1;AT1G52300.1;AT1G15250.2;AT1G15250.1;AT3G16080.2	AT3G16080.1;AT1G52300.1;AT1G15250.2;AT1G15250.1;AT3G16080.2	315
24.8641	25.0022	25.0674	24.9931	24.7455	25.4132				-1	19	19	6	23.5	23.5	8.1	104.22	0	85.648	668810000	48	65	AT1G52360.3;AT1G52360.4;AT1G52360.1;AT1G52360.2	AT1G52360.3;AT1G52360.4;AT1G52360.1;AT1G52360.2	316
32.1667	31.9917	31.7593	31.9782	32.4079	32.3921				-1	20	20	19	77	77	73.4	29.573	0	323.31	176980000000	12	561	AT1G52670.1	AT1G52670.1	319
27.1205	27.0051	26.9447	27.1417	26.9291	27.3309				-1	23	23	23	74.3	74.3	74.3	37.754	0	154.69	4571800000	23	104	AT1G52730.2;AT1G52730.1;AT1G52730.3;AT3G15610.1;AT1G15470.2;AT1G15470.1	AT1G52730.2;AT1G52730.1;AT1G52730.3;AT3G15610.1	320
NaN	22.3833	NaN	22.8495	NaN	22.7471				-1	3	3	3	12.3	12.3	12.3	36.975	0	4.9164	32923000	11	9	AT1G52760.1	AT1G52760.1	322
26.5767	26.6562	26.141	26.8536	25.852	27.0303				-1	13	13	12	62.2	62.2	58.9	35.804	0	122.66	2019100000	15	72	AT1G53240.1;AT3G15020.1;AT3G15020.2	AT1G53240.1;AT3G15020.1	325
23.1765	23.5252	23.5105	23.6859	NaN	23.5219				-1	17	17	13	22.1	22.1	17.1	110.28	0	57.787	223870000	59	40	AT1G53310.3;AT1G53310.2;AT1G53310.1;AT3G14940.2;AT3G14940.1	AT1G53310.3;AT1G53310.2;AT1G53310.1;AT3G14940.2;AT3G14940.1	327
24.0951	24.5262	24.762	24.489	24.1463	24.7723				-1	11	11	11	31.9	31.9	31.9	47.803	0	59.966	276000000	28	26	AT1G53750.1;AT1G53780.3;AT1G53780.4;AT1G53780.1;AT1G53780.2	AT1G53750.1	329
22.9567	22.8458	22.7777	22.2956	NaN	21.8529				-1	4	4	1	23.6	23.6	6.8	25.947	0	19.883	62742000	14	16	AT1G53850.2;AT1G53850.1	AT1G53850.2;AT1G53850.1	330
23.6278	23.6665	23.8498	23.8561	NaN	NaN				-1	5	5	5	13.6	13.6	13.6	47.233	0	39.981	117520000	12	15	AT1G54080.1;AT1G54080.2;AT3G14100.1;AT1G17370.2;AT1G17370.1	AT1G54080.1;AT1G54080.2;AT3G14100.1	332
23.2745	23.7359	23.7193	23.6018	24.412	23.6303				-1	7	7	7	43.2	43.2	43.2	20.597	0	26.25	185480000	9	26	AT1G54140.1	AT1G54140.1	334
25.182	25.2464	25.3528	25.6574	25.4298	25.5131				-1	16	16	13	30.3	30.3	26.4	65.389	0	93.152	968630000	33	69	AT1G54170.1	AT1G54170.1	335
27.7881	27.864	27.8862	27.7865	27.7872	27.582				-1	27	27	7	79.1	79.1	21.8	46.762	0	215.62	6724300000	23	165	AT1G54270.1;AT1G54270.2	AT1G54270.1;AT1G54270.2	336
21.7751	22.1008	NaN	21.6174	NaN	NaN				-1	2	2	2	19.5	19.5	19.5	12.62	0	4.9925	24188000	4	8	AT5G54760.4;AT5G54760.3;AT5G54760.2;AT5G54760.1;AT4G27130.1;AT1G54290.1;AT5G54940.3;AT5G54940.2;AT5G54940.1	AT5G54760.4;AT5G54760.3;AT5G54760.2;AT5G54760.1;AT4G27130.1;AT1G54290.1;AT5G54940.3;AT5G54940.2;AT5G54940.1	337
25.0792	24.5511	NaN	25.0779	24.9249	NaN				-1	7	3	3	15.5	4.4	4.4	52.015	0	12.771	168880000	10	17	AT1G54360.3;AT1G54360.1;AT1G54360.2;AT1G54360.5	AT1G54360.3;AT1G54360.1;AT1G54360.2	338
25.8458	25.7307	25.8526	26.0506	25.1886	25.7319				-1	21	21	17	51.1	51.1	40.7	59.135	0	150.66	1765000000	22	89	AT1G54360.4;AT1G54360.6	AT1G54360.4;AT1G54360.6	339
22.9999	23.4628	23.3344	23.6076	NaN	23.6954				-1	33	6	5	59.8	12	12	63.808	0	19.221	119810000	36	22	AT1G55490.5;AT1G55490.4;AT1G55490.3;AT1G55490.2;AT1G55490.1	AT1G55490.5;AT1G55490.4;AT1G55490.3;AT1G55490.2;AT1G55490.1	342
22.3928	22.704	22.8136	22.9584	NaN	23.1037				-1	6	6	6	13	13	13	61.876	0	28.249	93249000	19	18	AT1G55820.1	AT1G55820.1	345
23.4685	22.9201	23.1787	22.9344	23.4512	22.7293				-1	8	8	8	23.4	23.4	23.4	44.994	0	28.632	98107000	25	21	AT1G55890.1	AT1G55890.1	346
22.5998	24.0825	24.0407	22.0159	NaN	23.5342				-1	7	7	7	27.3	27.3	27.3	41.89	0	42.446	167050000	15	21	AT1G55900.2;AT1G55900.1	AT1G55900.2;AT1G55900.1	347
28.7774	28.8076	28.7897	28.8017	28.8703	29.0714				-1	52	52	52	61.3	61.3	61.3	93.89	0	323.31	13012000000	44	257	AT1G56070.3;AT1G56070.2;AT1G56070.1;AT3G12915.2;AT3G12915.1	AT1G56070.3;AT1G56070.2;AT1G56070.1	348
23.5727	23.3896	23.2316	24.0242	23.2176	24.2344				-1	11	11	11	29.3	29.3	29.3	58.673	0	71.412	173370000	25	26	AT1G56110.1;AT3G12860.1	AT1G56110.1	349
24.2718	24.7109	24.1081	24.4414	23.4297	25.2051				-1	15	15	8	42.1	42.1	27.8	48.527	0	57.024	393670000	27	39	AT1G56340.1;AT1G56340.2	AT1G56340.1;AT1G56340.2	352
23.3035	23.4157	23.3762	23.8917	NaN	NaN				-1	3	3	3	21.1	21.1	21.1	27.651	0	27.013	92029000	12	11	AT1G56450.1	AT1G56450.1	353
26.6013	26.6118	26.2243	26.4399	26.2708	26.0032				-1	11	11	1	47	47	5.5	18.709	0	93.232	1578600000	8	45	AT1G57860.1;AT1G57660.1	AT1G57860.1;AT1G57660.1	354
24.9797	24.8429	24.6976	25.2679	24.4485	25.3528				-1	12	6	6	35.8	20.1	20.1	46.4	0	52.202	570720000	18	29	AT1G57720.2;AT1G57720.1	AT1G57720.2;AT1G57720.1	355
26.2876	26.5229	26.2349	26.2117	25.13	26.3892				-1	15	4	4	48.9	16.9	16.9	30.771	0	28.45	1087300000	16	37	AT1G59359.1;AT1G58983.1;AT1G58684.1;AT1G58380.1	AT1G59359.1;AT1G58983.1;AT1G58684.1;AT1G58380.1	358
23.3893	NaN	23.6396	22.6553	NaN	22.4658				-1	6	6	6	15.9	15.9	15.9	49.032	0	16.097	72232000	21	15	AT1G60780.1;AT1G10730.1	AT1G60780.1;AT1G10730.1	370
22.8357	22.8871	21.8893	23.4182	NaN	23.2134				-1	8	8	8	21.5	21.5	21.5	40.879	0	21.271	74339000	15	23	AT1G61730.1;AT4G00390.1	AT1G61730.1	372
23.6102	23.3489	23.5273	23.4008	NaN	NaN				-1	6	6	6	15.9	15.9	15.9	45.757	0	12.782	105730000	22	15	AT1G61870.1	AT1G61870.1	373
NaN	22.7133	22.9549	23.0487	NaN	22.0635				-1	7	7	7	23.7	23.7	23.7	46.248	0	16.614	67048000	25	14	AT1G61990.2;AT1G61990.1	AT1G61990.2;AT1G61990.1	375
24.7037	24.9651	24.5599	23.935	NaN	24.0543				-1	7	7	6	30	30	27.5	36.183	0	38.435	330380000	13	26	AT1G62380.1;AT1G05010.1	AT1G62380.1	379
26.8904	26.7768	26.8024	26.8379	26.0582	27.0735				-1	38	38	38	59.1	59.1	59.1	82.707	0	269.53	3753100000	39	161	AT1G62390.1	AT1G62390.1	380
23.6651	23.7674	NaN	23.7297	NaN	NaN				-1	9	9	9	24.3	24.3	24.3	59.314	0	65.79	132640000	32	18	AT1G63660.1;AT1G63660.2	AT1G63660.1;AT1G63660.2	390
22.6854	23.7777	NaN	23.2812	NaN	23.5232				-1	7	7	7	23	23	23	52.115	0	29.284	116860000	30	14	AT1G63940.4;AT1G63940.1;AT1G63940.2;AT1G63940.3	AT1G63940.4;AT1G63940.1;AT1G63940.2;AT1G63940.3	393
23.5918	23.6734	23.2249	23.0473	NaN	NaN				-1	7	7	1	19.7	19.7	3.1	53.377	0	29.247	143130000	23	19	AT1G64190.1	AT1G64190.1	395
23.9465	23.2567	23.1349	23.4922	23.183	23.4306				-1	10	10	10	46.1	46.1	46.1	30.706	0	43.558	145710000	15	21	AT1G64520.1	AT1G64520.1	397
24.0152	23.761	23.9616	24.3899	NaN	23.8949				-1	9	9	9	18.7	18.7	18.7	79.643	0	45.085	166830000	33	24	AT1G64550.1	AT1G64550.1	398
22.6933	23.0776	22.855	22.6003	NaN	NaN				-1	4	4	4	7.4	7.4	7.4	60.235	0	6.3841	54034000	25	13	AT1G64880.1	AT1G64880.1	401
27.2204	27.5015	27.0096	26.7803	26.5484	26.8243				-1	15	15	15	54.1	54.1	54.1	28.912	0	246.21	2513400000	16	85	AT1G65260.2;AT1G65260.1	AT1G65260.2;AT1G65260.1	403
24.2608	25.1345	24.5507	25.0285	NaN	NaN				-1	1	1	1	1.6	1.6	1.6	69.054	0.0020736	2.0288	139690000	36	9	AT1G65800.2;AT1G65800.1	AT1G65800.2;AT1G65800.1	405
24.0127	24.093	23.8547	24.0793	NaN	24.4357				-1	15	15	14	39.8	39.8	37.8	45.746	0	60.189	283670000	25	41	AT1G65930.1;AT1G54340.1;AT1G54340.2	AT1G65930.1	406
25.2848	25.4146	25.0856	25.6406	25.2331	24.2678				-1	5	5	5	43.2	43.2	43.2	17.428	0	82.332	408270000	6	17	AT1G65980.1;AT1G65980.2	AT1G65980.1;AT1G65980.2	407
NaN	23.7604	NaN	23.5946	NaN	23.9863				-1	2	2	2	40.9	40.9	40.9	7.0731	0	5.6453	81951000	4	9	AT1G66240.2;AT1G66240.1	AT1G66240.2;AT1G66240.1	408
25.9749	26.0617	25.9754	25.8521	NaN	26.0545				-1	12	12	4	48.4	48.4	16.3	24.929	0	35.968	801450000	11	37	AT1G66580.1	AT1G66580.1	409
23.0154	NaN	22.6465	23.0216	NaN	23.0454				-1	4	4	3	27.8	27.8	20	20.216	0	21.48	71266000	12	13	AT1G67090.1;AT1G67090.2	AT1G67090.1;AT1G67090.2	410
22.6217	22.5436	23.0665	22.754	NaN	23.2405				-1	32	32	32	7.1	7.1	7.1	611.15	0	72.918	157670000	275	54	AT1G67120.1;AT1G67120.2	AT1G67120.1;AT1G67120.2	411
26.398	26.3315	26.5446	26.4084	26.4919	26.9542				-1	64	64	64	47.1	47.1	47.1	129.09	0	323.31	6238900000	54	252	AT1G67230.1	AT1G67230.1	412
26.6402	26.9074	26.6871	26.7955	26.8465	26.2966				-1	8	8	1	48	48	5.7	19.854	0	25.535	1189100000	10	40	AT1G67430.1;AT1G67430.2	AT1G67430.1;AT1G67430.2	414
22.6341	23.1552	22.5292	23.0072	NaN	NaN				-1	7	7	7	30.2	30.2	30.2	34.487	0	36.568	68726000	13	17	AT1G69010.1	AT1G69010.1	419
23.4147	23.3384	23.827	22.9907	NaN	23.5475				-1	11	11	11	23.6	23.6	23.6	66.864	0	45.311	135400000	32	20	AT1G70770.2;AT1G70770.1;AT1G23170.2;AT1G23170.1	AT1G70770.2;AT1G70770.1	428
29.5174	29.3901	29.2665	28.9814	28.9953	29.4647				-1	11	11	11	61.8	61.8	61.8	26.295	0	68.192	14436000000	15	112	AT1G71260.1	AT1G71260.1	432
24.9424	24.6754	24.4083	24.1343	23.7494	24.2677				-1	6	6	6	39.8	39.8	39.8	19.484	0	46.203	376860000	15	26	AT1G71310.1;AT1G71310.2;AT1G71310.3	AT1G71310.1;AT1G71310.2;AT1G71310.3	434
29.1389	29.1113	29.191	28.8854	28.7355	29.1485				-1	42	42	36	65.8	65.8	60.3	74.422	0	323.31	12977000000	33	224	AT1G71770.2;AT1G71770.1	AT1G71770.2;AT1G71770.1	436
27.2281	27.4788	27.0818	27.3277	27.2303	26.9116				-1	13	13	13	49.3	49.3	49.3	31.981	0	120.92	2574100000	14	70	AT1G72370.2;AT1G72370.1;AT3G04770.2;AT3G04770.1	AT1G72370.2;AT1G72370.1	440
25.9831	25.9294	26.0098	26.144	25.7186	26.5928				-1	44	44	44	54.3	54.3	54.3	143.31	0	323.31	3226400000	53	177	AT1G72390.2;AT1G72390.1	AT1G72390.2;AT1G72390.1	441
23.3986	23.6327	23.3749	23.2176	NaN	NaN				-1	5	5	5	23.6	23.6	23.6	22.691	0	19.942	97926000	9	15	AT1G73030.1;AT1G17730.1	AT1G73030.1	445
NaN	24.6348	24.495	24.2794	NaN	24.0911				-1	4	4	2	33.3	33.3	22.4	18.004	0	8.3833	143710000	6	14	AT1G73230.1	AT1G73230.1	447
NaN	22.2142	22.5698	22.2506	NaN	NaN				-1	8	8	2	19.8	19.8	7.9	68.135	0	25.98	58855000	36	17	AT1G74040.1;AT1G74040.2;AT1G74040.3	AT1G74040.1;AT1G74040.2;AT1G74040.3	451
26.9403	27.0178	26.906	26.5848	26.4844	27.067				-1	18	18	8	57.9	57.9	29.6	26.008	0	77.115	2812900000	11	96	AT1G74060.1;AT1G74050.1	AT1G74060.1;AT1G74050.1	452
23.8325	23.9702	23.7382	NaN	23.4401	NaN				-1	3	3	3	10.7	10.7	10.7	28.728	0	12.925	139800000	6	13	AT1G74230.1	AT1G74230.1	453
NaN	22.7154	23.0918	NaN	NaN	23.2372				-1	9	9	9	8.7	8.7	8.7	153.95	0	28.025	98972000	74	16	AT1G74260.1	AT1G74260.1	454
24.0418	23.7688	23.5863	23.4549	23.5608	24.1267				-1	7	7	7	20.1	20.1	20.1	51.837	0	27.455	206190000	25	25	AT1G74470.1	AT1G74470.1	455
23.6535	24.0474	24.0351	23.6258	23.7562	24.4142				-1	5	5	3	39.4	39.4	26.2	17.857	0	24.012	160900000	7	22	AT1G75950.1;AT4G34470.1;AT4G34210.1	AT1G75950.1	462
NaN	23.013	23.2679	22.8214	23.0096	23.0206				-1	4	4	4	36.7	36.7	36.7	11.286	0	13.903	78561000	4	14	AT1G76860.1;AT1G21190.1	AT1G76860.1;AT1G21190.1	468
26.7199	26.8728	26.5648	27.0456	26.1746	27.1096				-1	13	13	13	46.2	46.2	46.2	41.178	0	80.448	3057700000	20	86	AT1G77120.1	AT1G77120.1	469
23.4359	22.9347	NaN	NaN	NaN	23.0092				-1	4	1	1	42	17	17	12.29	0	8.7519	50967000	5	6	AT1G77940.1;AT1G36240.1	AT1G77940.1;AT1G36240.1	474
25.6159	25.9979	25.8345	26.2011	25.1961	25.4783				-1	9	9	9	38.4	38.4	38.4	25.65	0	31.921	565600000	14	31	AT1G78380.1;AT1G17170.1	AT1G78380.1	478
23.8996	23.817	23.944	24.1111	23.5072	24.2823				-1	15	15	15	31.3	31.3	31.3	68.812	0	72.022	281350000	38	37	AT1G78900.2;AT1G78900.1	AT1G78900.2;AT1G78900.1	480
26.268	26.2406	26.4901	26.3071	26.0877	26.3885				-1	28	28	28	46.7	46.7	46.7	88.839	0	178.97	3156200000	38	122	AT1G79090.3;AT1G79090.2;AT1G79090.1	AT1G79090.3;AT1G79090.2;AT1G79090.1	483
23.858	23.9825	23.7118	24.0135	23.9878	24.5011				-1	7	7	7	23	23	23	41.893	0	40.048	219590000	25	24	AT1G79230.1;AT1G79230.3;AT1G79230.2	AT1G79230.1;AT1G79230.3;AT1G79230.2	484
NaN	23.7212	NaN	24.3813	NaN	23.7542				-1	6	6	6	17.7	17.7	17.7	45.483	0	15.411	83492000	22	13	AT1G79340.1;AT1G79330.1	AT1G79340.1	486
22.6304	22.6149	NaN	23.1404	NaN	23.6266				-1	9	9	9	24.2	24.2	24.2	56.558	0	34.296	108730000	31	18	AT1G79440.1	AT1G79440.1	487
24.8593	24.9671	24.8248	25.0844	24.9417	25.4422				-1	17	15	15	50.9	48.3	48.3	44.83	0	143.17	908330000	24	60	AT1G79530.1;AT1G16300.1	AT1G79530.1;AT1G16300.1	489
25.8019	26.1746	25.591	26.1282	25.2671	26.4435				-1	23	23	18	73.8	73.8	60.1	42.131	0	124.77	2531100000	25	105	AT1G79550.2;AT1G79550.1	AT1G79550.2;AT1G79550.1	490
28.7882	28.7467	28.7089	28.9585	28.938	29.4588				-1	69	69	52	64.7	64.7	53.2	137.24	0	323.31	35235000000	55	504	AT1G79570.2;AT1G79570.1;AT1G79570.5;AT1G79570.4;AT1G79570.3;AT1G14000.1;AT4G23050.1;AT4G23050.2	AT1G79570.2;AT1G79570.1;AT1G79570.5;AT1G79570.4;AT1G79570.3	491
24.5602	24.1008	24.0685	24.7586	NaN	24.6902				-1	28	5	5	52.6	16.4	16.4	81.775	0	106.15	278410000	36	20	AT1G79920.4;AT1G79920.3;AT1G79920.2;AT1G79920.1	AT1G79920.4;AT1G79920.3;AT1G79920.2;AT1G79920.1	495
25.5861	25.6396	25.7278	25.8431	25.0372	26.1644				-1	33	33	10	52.7	52.7	19	87.316	0	191.9	2615500000	44	115	AT1G79930.2;AT1G79930.1	AT1G79930.2;AT1G79930.1	496
24.5479	24.3567	24.3989	24.2797	NaN	24.2649				-1	33	33	33	19.4	19.4	19.4	275.42	0	99.989	378010000	123	62	AT1G80070.1;AT4G38780.1	AT1G80070.1;AT4G38780.1	499
24.0124	23.8742	23.9844	23.7415	NaN	23.8486				-1	11	11	10	23	23	21.3	67.281	0	33.522	235130000	37	29	AT1G80270.5;AT1G80270.4;AT1G80270.3;AT1G80270.2;AT1G80270.1	AT1G80270.5;AT1G80270.4;AT1G80270.3;AT1G80270.2;AT1G80270.1	500
NaN	22.1652	21.9392	NaN	NaN	22.6461				-1	4	4	4	5.6	5.6	5.6	102.15	0	10.574	28905000	52	10	AT1G80410.1;AT1G80410.2	AT1G80410.1;AT1G80410.2	501
23.9422	23.9128	24.0769	24.1403	NaN	24.0924				-1	6	6	4	17.1	17.1	11.5	49.487	0	27.797	186560000	21	21	AT1G80480.1	AT1G80480.1	503
22.3095	22.6249	22.3016	22.3853	NaN	NaN				-1	5	5	2	22.2	22.2	8.9	43.37	0	30.11	44841000	20	14	AT1G80560.1;AT5G14200.3;AT5G14200.1;AT5G14200.2	AT1G80560.1;AT5G14200.3;AT5G14200.1	505
24.631	25.04	24.7198	25.1234	23.7745	25.6466				-1	16	16	14	50.6	50.6	46.3	42.327	0	78.575	740040000	21	58	AT2G01140.1	AT2G01140.1	508
30.7788	30.6284	30.7835	30.556	32.185	30.7146				-1	24	24	24	42.5	42.5	42.5	77.337	0	323.31	68790000000	22	252	AT2G01190.1	AT2G01190.1	509
26.4706	26.3088	26.2774	26.0284	26.2366	25.9667				-1	16	16	8	57.4	57.4	36	28.171	0	75.106	1410000000	14	64	AT2G01250.1;AT2G01250.2	AT2G01250.1;AT2G01250.2	510
24.7083	24.3312	24.47	24.6868	24.214	24.164				-1	12	12	12	55.9	55.9	55.9	30.845	0	49.234	475480000	19	35	AT2G01350.2;AT2G01350.4;AT2G01350.3;AT2G01350.1	AT2G01350.2;AT2G01350.4;AT2G01350.3;AT2G01350.1	511
23.0152	22.7544	22.9318	NaN	NaN	NaN				-1	8	8	8	15.2	15.2	15.2	75.831	0	16.162	59667000	33	11	AT2G02160.1	AT2G02160.1	514
25.3206	25.6398	25.4553	25.5686	25.5382	25.7533				-1	32	32	32	28.8	28.8	28.8	134.62	0	123.69	1356900000	68	118	AT2G02560.2;AT2G02560.1	AT2G02560.2;AT2G02560.1	517
28.2787	28.0113	28.0412	27.4241	27.3731	27.3953				-1	13	13	11	52.6	52.6	45.1	29.728	0	142.62	5431400000	16	75	AT2G02740.1	AT2G02740.1	518
23.2115	23.3827	23.3048	23.5999	23.4934	23.99				-1	7	7	7	15.6	15.6	15.6	65.266	0	46.798	213420000	27	28	AT2G02790.3;AT2G02790.2;AT2G02790.1	AT2G02790.3;AT2G02790.2;AT2G02790.1	519
23.6184	23.3095	23.9419	23.3091	NaN	NaN				-1	4	4	4	21.2	21.2	21.2	32.259	0	23.942	111870000	16	12	AT2G03050.1;AT2G03050.2	AT2G03050.1;AT2G03050.2	520
23.4125	23.0219	NaN	23.1534	NaN	23.8836				-1	6	6	6	16.6	16.6	16.6	40.596	0	16.397	106530000	18	18	AT2G03510.1	AT2G03510.1	524
23.093	23.2413	23.0913	23.1229	23.1459	23.6423				-1	10	10	10	22.1	22.1	22.1	59.293	0	26.53	167450000	28	28	AT2G03820.1	AT2G03820.1	527
23.6941	24.1314	25.116	21.3924	NaN	NaN				-1	3	3	3	33.3	33.3	33.3	10.773	0	26.955	103680000	6	10	AT2G03870.2;AT2G03870.1	AT2G03870.2;AT2G03870.1	528
26.0212	26.1473	26.0242	26.2085	25.126	26.4477				-1	34	34	30	56.5	56.5	51.5	88.255	0	319.28	2209600000	47	121	AT2G04030.2;AT2G04030.1	AT2G04030.2;AT2G04030.1	529
26.0618	26.4606	26.0527	26.3182	25.8865	25.4645				-1	9	9	9	37.1	37.1	37.1	16.036	0	23.454	1228300000	4	50	AT3G10610.1;AT2G05220.2;AT2G05220.1;AT5G04800.4;AT5G04800.3;AT5G04800.2;AT5G04800.1;AT2G04390.1	AT3G10610.1;AT2G05220.2;AT2G05220.1;AT5G04800.4;AT5G04800.3;AT5G04800.2;AT5G04800.1;AT2G04390.1	530
23.8943	23.9633	24.0297	24.1656	NaN	23.9277				-1	11	11	11	29.4	29.4	29.4	44.577	0	26.667	187140000	27	36	AT2G04400.1	AT2G04400.1	531
26.5709	26.7777	26.2002	26.9144	26.2059	27.0238				-1	38	38	27	54.5	54.5	39.3	108.2	0	323.31	4842600000	50	171	AT2G05710.1	AT2G05710.1	535
24.1002	24.3615	23.822	23.8799	NaN	24.1128				-1	11	11	11	39	39	39	39.612	0	74.831	273330000	24	30	AT2G05830.1;AT2G05830.3;AT2G05830.2;AT2G05830.4	AT2G05830.1;AT2G05830.3;AT2G05830.2;AT2G05830.4	536
24.3896	24.5466	24.476	24.4902	NaN	24.6186				-1	14	14	14	50.5	50.5	50.5	41.213	0	123.42	286310000	22	26	AT2G05990.2;AT2G05990.1	AT2G05990.2;AT2G05990.1	539
27.734	27.6384	27.6499	20.3673	NaN	19.6522				-1	56	56	56	56.4	56.4	56.4	130.08	0	323.31	5996300000	53	179	AT2G07360.1;AT2G07360.2	AT2G07360.1;AT2G07360.2	544
26.2083	26.3554	26.1131	26.5415	26.4049	26.7876				-1	23	23	22	33.7	33.7	32.8	85.932	0	194.77	2462000000	32	107	AT2G07698.1	AT2G07698.1	548
23.0038	22.7452	22.8576	23.1039	NaN	NaN				-1	4	4	4	9.9	9.9	9.9	43.025	0	7.3039	69598000	19	11	AT2G07734.1	AT2G07734.1	549
23.4832	23.4847	23.6647	23.7492	23.5261	23.6582				-1	11	11	5	16.1	16.1	7.3	81.781	0	28.589	174430000	52	32	AT2G14120.4;AT2G14120.2;AT2G14120.1;AT2G14120.3	AT2G14120.4;AT2G14120.2;AT2G14120.1;AT2G14120.3	553
23.5451	23.3041	23.5103	23.2555	NaN	NaN				-1	6	6	6	22	22	22	32.692	0	21.581	107780000	17	11	AT2G14850.1	AT2G14850.1	555
23.7934	23.2671	23.4953	23.5471	NaN	23.6493				-1	9	9	9	43.9	43.9	43.9	35.461	0	59.946	129940000	14	20	AT2G15430.1;AT2G15430.3;AT2G15430.2;AT2G15400.2;AT2G15400.1	AT2G15430.1;AT2G15430.3;AT2G15430.2	556
23.6497	23.907	24.399	24.0708	NaN	24.0891				-1	16	16	16	33.1	33.1	33.1	65.504	0	50.757	321220000	34	41	AT2G15620.1	AT2G15620.1	557
24.4539	24.3061	24.0064	24.2562	23.9719	23.6074				-1	8	8	8	15.4	15.4	15.4	65.613	0	30.313	299430000	29	23	AT2G15690.1	AT2G15690.1	558
25.1922	25.5036	25.1227	25.4237	24.3547	25.5586				-1	7	7	7	50	50	50	18.034	0	24.58	546190000	11	32	AT2G16060.1	AT2G16060.1	561
22.4266	22.6551	22.3752	23.1799	NaN	23.4427				-1	15	15	15	18.3	18.3	18.3	93.655	0	36.795	109670000	43	30	AT2G16440.1	AT2G16440.1	562
NaN	NaN	23.0817	23.087	NaN	22.8388				-1	8	8	8	5.4	5.4	5.4	193.31	0	16.326	60040000	78	12	AT2G16485.2;AT2G16485.1	AT2G16485.2;AT2G16485.1	563
26.0236	25.8949	25.8417	25.8005	25.4489	26.4119				-1	17	17	17	33.6	33.6	33.6	61.842	0	160.44	1611800000	24	69	AT2G16570.1;AT4G34740.1;AT4G38880.1	AT2G16570.1	564
25.49	25.4934	25.0689	25.4006	24.6141	25.3767				-1	7	5	5	55.5	46.2	46.2	18.492	0	48.215	491830000	9	21	AT2G16600.1;AT2G16600.2	AT2G16600.1;AT2G16600.2	565
24.0812	24.3092	24.304	23.985	24.2468	24.1246				-1	12	12	12	16.2	16.2	16.2	99.108	0	60.161	280930000	42	36	AT2G16950.2;AT2G16950.1	AT2G16950.2;AT2G16950.1	568
23.6576	23.8135	23.4481	23.3226	NaN	NaN				-1	6	2	2	23.4	8.5	8.5	39.148	0	40.514	90349000	16	12	AT2G17130.2;AT2G17130.1	AT2G17130.2;AT2G17130.1	569
NaN	22.3275	NaN	22.2648	NaN	22.4585				-1	4	4	4	16.2	16.2	16.2	29.889	0	21.112	34594000	15	8	AT2G17280.2;AT2G17280.1	AT2G17280.2;AT2G17280.1	571
27.3131	27.1333	26.9901	27.0045	26.7381	27.1039				-1	21	21	21	71.3	71.3	71.3	27.707	0	73.591	3967300000	16	95	AT5G07090.3;AT5G07090.2;AT2G17360.1;AT5G07090.1;AT5G58420.1;AT2G17360.2	AT5G07090.3;AT5G07090.2;AT2G17360.1;AT5G07090.1;AT5G58420.1;AT2G17360.2	572
24.1165	NaN	23.6598	24.1005	NaN	24.5821				-1	6	6	6	23.3	23.3	23.3	38.257	0	28.812	161540000	13	13	AT2G17420.2;AT2G17420.1;AT4G35460.1	AT2G17420.2;AT2G17420.1;AT4G35460.1	576
26.4448	26.4657	26.746	26.0455	27.779	26.4925				-1	6	6	6	38.8	38.8	38.8	21.815	0	38.609	863970000	11	22	AT2G17850.3;AT2G17850.1;AT2G17850.2	AT2G17850.3;AT2G17850.1;AT2G17850.2	580
24.8995	24.8491	25.0261	24.9731	24.6813	NaN				-1	6	6	6	29.6	29.6	29.6	29.564	0	42.143	233900000	18	13	AT2G17870.1	AT2G17870.1	581
25.8673	25.8624	26.0792	26.0288	26.2677	25.9323				-1	152	152	95	48.8	48.8	33.7	436.35	0	323.31	9351400000	224	630	AT2G17930.1;REV__AT5G04240.1	AT2G17930.1	582
27.1884	27.316	27.1698	27.1109	26.7593	27.2026				-1	11	11	3	46.1	46.1	18.6	27.859	0	53.701	3105300000	14	66	AT2G18020.1;AT3G51190.1	AT2G18020.1	584
25.0438	24.982	25.282	24.5804	25.3488	25.4559				-1	6	6	6	52.1	52.1	52.1	13.015	0	21.986	457730000	9	23	AT2G18040.1	AT2G18040.1	585
23.8889	24.2347	24.0157	24.3564	NaN	NaN				-1	11	8	5	62.3	55.4	41.6	25.266	0	35.025	204120000	11	22	AT2G18110.1	AT2G18110.1	586
24.015	24.075	23.8769	23.4895	NaN	24.5237				-1	6	6	6	22	22	22	39.888	0	22.264	172470000	13	16	AT2G18510.1	AT2G18510.1	589
24.6673	24.7344	24.7427	25.1648	24.6834	25.4391				-1	42	42	38	41.8	41.8	38.2	133.36	0	246	1146300000	53	119	AT2G19390.2;AT2G19390.1	AT2G19390.2;AT2G19390.1	591
23.3124	23.4428	NaN	23.6094	NaN	NaN				-1	5	4	4	16.4	14.2	14.2	42.846	0	7.2652	74183000	13	10	AT2G19480.3;AT2G19480.2;AT2G19480.1	AT2G19480.3;AT2G19480.2;AT2G19480.1	592
NaN	22.8156	NaN	23.5296	NaN	22.7768				-1	8	8	8	23.3	23.3	23.3	46.159	0	30.577	90607000	23	12	AT2G19490.1	AT2G19490.1	593
28.1053	27.8958	27.7623	27.8516	28.0542	28.4272				-1	7	7	6	48.3	48.3	39.2	15.895	0	46.485	2075300000	7	39	AT2G19730.3;AT2G19730.2;AT2G19730.1	AT2G19730.3;AT2G19730.2;AT2G19730.1	597
25.8854	26.1982	26.064	26.1725	26.1825	23.536				-1	4	4	4	37.8	37.8	37.8	13.82	0	22.777	497310000	4	16	AT4G26230.1;AT2G19740.1;AT5G56710.1;AT5G56710.2	AT4G26230.1;AT2G19740.1;AT5G56710.1	598
27.3596	27.2242	NaN	27.1211	27.1496	NaN				-1	2	2	2	27.4	27.4	27.4	6.887	0	4.4741	676570000	3	10	AT5G56670.1;AT4G29390.1;AT2G19750.1	AT5G56670.1;AT4G29390.1;AT2G19750.1	599
25.2931	25.1714	25.7026	25.2435	25.0639	24.2172				-1	12	12	12	32.7	32.7	32.7	49.369	0	97.768	658960000	25	38	AT4G29040.1;AT2G20140.1	AT4G29040.1;AT2G20140.1	603
24.894	25.2827	24.5309	25.1759	23.469	25.7272				-1	18	18	18	53.4	53.4	53.4	45.345	0	87.452	739410000	28	54	AT2G20420.1	AT2G20420.1	607
25.0517	25.0459	25.1299	24.6911	NaN	25.2249				-1	10	4	4	50.7	22.4	22.4	15.506	0	9.1268	283330000	6	15	AT2G20450.1	AT2G20450.1	608
28.8254	28.6991	29.1428	28.6046	29.4743	28.5039				-1	18	18	18	77.5	77.5	77.5	30.701	0	255.09	8700800000	15	127	AT2G20550.1;AT2G20550.2;AT2G20560.1	AT2G20550.1;AT2G20550.2	609
25.0782	25.2917	25.1756	24.9258	24.905	25.0349				-1	32	32	20	46.5	46.5	31.4	98.143	0	138.89	1387300000	54	102	AT2G20580.1	AT2G20580.1	610
24.6218	24.543	24.4552	24.0145	NaN	24.0093				-1	5	5	5	15.7	15.7	15.7	37.225	0	12.476	207500000	10	10	AT2G20760.1;AT3G51890.1	AT2G20760.1	611
24.4198	24.3024	24.4235	24.6109	NaN	24.7391				-1	14	14	13	25.4	25.4	23.9	65.371	0	55.588	374050000	29	37	AT2G20800.1;AT4G28220.2;AT4G28220.1	AT2G20800.1	612
23.9191	24.1486	23.6799	23.8375	NaN	23.9093				-1	7	7	3	46	46	23.6	18.464	0	16.692	197440000	11	23	AT2G21130.1	AT2G21130.1	616
24.3738	24.4637	23.9257	24.0039	NaN	24.627				-1	6	6	6	26.5	26.5	26.5	32.306	0	19.007	187910000	16	16	AT2G21170.2;AT2G21170.3;AT2G21170.1	AT2G21170.2;AT2G21170.3;AT2G21170.1	618
22.7809	23.5594	22.9946	23.0733	NaN	23.0003				-1	6	6	6	14.1	14.1	14.1	56.326	0	23.747	75717000	25	17	AT2G21230.4;AT2G21230.1;AT2G21230.3;AT2G21230.2	AT2G21230.4;AT2G21230.1;AT2G21230.3;AT2G21230.2	619
24.1294	24.4239	23.8357	24.8091	NaN	25.1268				-1	12	10	10	44	39.6	39.6	41.807	0	66.757	345410000	20	32	AT2G21330.3;AT2G21330.1;AT2G21330.2;AT4G38970.1;AT4G38970.2	AT2G21330.3;AT2G21330.1;AT2G21330.2;AT4G38970.1	622
24.5382	24.7988	24.8749	24.678	24.7434	25.0223				-1	36	36	17	37.6	37.6	19.5	136.47	0	175.3	1115000000	70	107	AT2G21390.1	AT2G21390.1	623
26.1409	26.3354	25.9696	26.2789	26.6782	26.0468				-1	6	6	1	58.9	58.9	13.1	11.941	0	37.87	1176700000	6	23	AT2G21580.2;AT2G21580.1	AT2G21580.2;AT2G21580.1	626
26.3714	26.6653	26.2947	26.9361	26.4027	26.8744				-1	11	11	9	71	71	64.8	16.89	0	160.65	1950200000	12	57	AT2G21660.1;AT2G21660.2	AT2G21660.1;AT2G21660.2	627
23.9823	23.8387	24.0028	23.8236	23.8436	23.7781				-1	3	3	3	16.4	16.4	16.4	24.242	0	9.9322	133870000	10	12	AT2G22230.1;AT5G10160.1	AT2G22230.1	628
22.9287	22.9226	NaN	22.3279	NaN	22.6469				-1	6	6	6	18.2	18.2	18.2	46.038	0	20.71	58651000	19	15	AT2G22250.1;AT2G22250.3;AT2G22250.2	AT2G22250.1;AT2G22250.3;AT2G22250.2	629
27.2827	27.239	27.3946	27.1893	26.7297	27.6088				-1	33	33	25	65.4	65.4	57.9	47.761	0	323.31	6585200000	24	176	AT2G22360.1	AT2G22360.1	631
23.2648	23.7923	23.5581	23.5717	NaN	23.8915				-1	9	9	9	44.4	44.4	44.4	37.465	0	44.004	143780000	18	21	AT2G22780.1;AT5G09660.2;AT5G09660.3;AT5G09660.5;AT5G09660.1;AT5G09660.4	AT2G22780.1	634
28.589	28.6511	28.6531	28.7859	28.3787	28.486				-1	35	33	31	51.8	50.5	48	71.652	0	323.31	13187000000	30	203	AT2G23350.1	AT2G23350.1	639
24.7933	NaN	24.8546	24.5019	NaN	24.6038				-1	2	2	2	66.7	66.7	66.7	5.7965	0	23.614	158920000	4	10	AT2G23930.2;AT2G23930.1;AT3G11500.2;AT3G11500.1	AT2G23930.2;AT2G23930.1;AT3G11500.2;AT3G11500.1	640
22.8215	NaN	23.0561	22.9255	NaN	22.6623				-1	12	12	12	16.3	16.3	16.3	82.889	0	25.943	103290000	44	17	AT2G24050.1	AT2G24050.1	641
NaN	23.3934	23.4078	23.8373	NaN	NaN				-1	5	5	3	16.5	16.5	11.6	50.592	0	38.803	98527000	27	12	AT2G24200.3;AT2G24200.2;AT2G24200.1	AT2G24200.3;AT2G24200.2;AT2G24200.1	642
24.563	NaN	25.0049	23.6413	27.7629	NaN				-1	6	6	6	49.6	49.6	49.6	13.026	0	21.712	258040000	6	17	AT2G25720.1	AT2G25720.1	646
23.5229	23.7687	23.8994	22.3083	22.7136	23.2661				-1	14	14	12	25.1	25.1	22.4	76.181	0	61.812	198090000	37	39	AT2G25760.1;AT2G25760.2	AT2G25760.1;AT2G25760.2	648
23.9549	23.8912	23.7108	24.0099	NaN	23.8956				-1	6	6	6	28.1	28.1	28.1	27.377	0	17.528	129390000	16	14	AT2G27020.1;AT2G27020.2	AT2G27020.1;AT2G27020.2	655
23.8457	NaN	24.5279	NaN	25.182	24.6674				-1	6	6	6	44.4	44.4	44.4	24.565	0	51.416	115380000	13	14	AT3G43810.2;AT5G21274.1;AT2G27030.3;AT2G41110.2;AT2G27030.1;AT2G41110.1;AT3G56800.1;AT3G43810.1;AT1G66410.1;AT5G37780.1;AT1G66410.2;AT5G37780.2;AT5G37780.3;AT3G43810.4;AT5G37780.4;AT3G43810.3;AT1G66410.3;AT1G66410.4	AT3G43810.2;AT5G21274.1;AT2G27030.3;AT2G41110.2;AT2G27030.1;AT2G41110.1;AT3G56800.1;AT3G43810.1;AT1G66410.1;AT5G37780.1;AT1G66410.2;AT5G37780.2;AT5G37780.3;AT3G43810.4;AT5G37780.4;AT3G43810.3	656
22.8871	23.1671	23.4363	23.3635	23.1954	22.9466				-1	8	8	8	13.5	13.5	13.5	81.097	0	49.119	115190000	36	23	AT2G27100.1	AT2G27100.1	657
25.5957	25.2771	25.5324	25.6032	25.3921	25.8002				-1	25	25	25	59.8	59.8	59.8	60.757	0	173.4	1869400000	32	97	AT2G27200.1;AT1G08410.1	AT2G27200.1	659
27.1919	27.3148	27.0976	27.0576	NaN	27.2405				-1	8	8	4	40.7	40.7	23.1	24.425	0	18.702	856280000	11	21	AT2G27530.2;AT2G27530.1	AT2G27530.2;AT2G27530.1	660
23.6903	23.6494	23.6275	23.815	NaN	24.1479				-1	15	15	15	44.8	44.8	44.8	48.592	0	97.537	341050000	28	45	AT2G27600.1	AT2G27600.1	661
NaN	26.3669	NaN	26.3281	27.1528	NaN				-1	3	2	2	32.7	22.4	22.4	10.243	0.00061087	3.5977	440080000	6	10	AT2G27710.4;AT2G27710.3;AT2G27710.2;AT2G27710.1	AT2G27710.4;AT2G27710.3;AT2G27710.2;AT2G27710.1	663
25.5095	NaN	26.1184	25.6152	26.2607	25.671				-1	3	3	2	48.7	48.7	40	11.452	0	24.404	264550000	5	13	AT2G27720.1;AT2G27720.3;AT2G27720.2;AT2G27720.4	AT2G27720.1;AT2G27720.3;AT2G27720.2;AT2G27720.4	664
NaN	NaN	21.6866	22.6924	22.9032	22.4298				-1	2	2	2	26.5	26.5	26.5	11.947	0	14.137	31204000	5	10	AT2G27730.4;AT2G27730.3;AT2G27730.2;AT2G27730.1	AT2G27730.4;AT2G27730.3;AT2G27730.2;AT2G27730.1	665
26.7879	26.8281	26.7575	26.9064	26.4699	27.0473				-1	29	28	28	65	63.8	63.8	62.071	0	259.36	4812900000	31	132	AT2G28000.1	AT2G28000.1	669
21.8253	NaN	22.112	22.3825	NaN	22.1744				-1	11	11	11	3.4	3.4	3.4	384.79	0	30.632	49584000	141	25	AT2G28290.2;AT2G28290.4;AT2G28290.3;AT2G28290.6;AT2G28290.1;AT2G28290.5	AT2G28290.2;AT2G28290.4;AT2G28290.3;AT2G28290.6;AT2G28290.1;AT2G28290.5	670
24.5256	24.4222	24.6539	24.3545	24.1781	24.8381				-1	19	19	4	25.9	25.9	8.2	106.56	0	89.059	460690000	39	51	AT2G29200.2;AT2G29200.1	AT2G29200.2;AT2G29200.1	675
26.7091	26.5019	26.3962	26.6362	26.2539	26.9453				-1	24	7	2	58.1	22.9	6.9	50.747	0	45.616	1124300000	21	30	AT2G29550.1	AT2G29550.1	677
23.7873	24.4765	23.6677	24.1925	NaN	24.4354				-1	8	8	2	36.7	36.7	6.8	29.222	0	38.666	189090000	16	23	AT2G29570.1	AT2G29570.1	678
NaN	22.0735	21.3021	20.7881	NaN	NaN				-1	2	2	2	5.1	5.1	5.1	57.351	0.000625	3.8462	19349000	24	9	AT2G31060.1;AT2G31060.2;AT2G31060.3	AT2G31060.1;AT2G31060.2;AT2G31060.3	684
23.1323	23.1278	23.0995	23.1261	NaN	23.2355				-1	10	10	10	36.9	36.9	36.9	32.101	0	34.917	105160000	16	18	AT2G32080.2;AT2G32080.1	AT2G32080.2;AT2G32080.1	691
24.6369	24.8219	NaN	24.2521	NaN	24.3422				-1	5	5	5	30.7	30.7	30.7	24.331	0	18.976	201810000	10	15	AT2G32520.3;AT2G32520.1;AT2G32520.4;AT2G32520.2	AT2G32520.3;AT2G32520.1;AT2G32520.4;AT2G32520.2	692
22.9064	23.1967	23.1915	23.0814	NaN	NaN				-1	5	5	5	23.1	23.1	23.1	31.369	0	18.071	95684000	13	18	AT2G32600.1	AT2G32600.1	693
24.4497	24.4554	24.6592	24.1847	NaN	24.6555				-1	18	18	8	24.9	24.9	10.4	108.98	0	100.19	474270000	38	52	AT2G32730.1	AT2G32730.1	695
NaN	23.8704	23.3995	23.3507	NaN	22.4202				-1	4	4	4	19.1	19.1	19.1	35.448	0	20.763	129530000	19	9	AT2G33040.1	AT2G33040.1	696
25.2711	25.5173	25.4915	25.8388	24.3585	25.9398				-1	31	14	14	61.7	36.4	36.4	61.477	0	135.38	997460000	35	52	AT2G33210.2;AT2G33210.1	AT2G33210.2;AT2G33210.1	698
26.409	26.392	26.2778	26.0132	26.3687	26.4431				-1	14	14	4	62.4	62.4	21.9	21.307	0	93.685	1522500000	8	61	AT2G34480.1;AT2G34480.2	AT2G34480.1;AT2G34480.2	705
22.4433	22.5375	22.7462	23.1513	NaN	22.7601				-1	7	7	7	17.4	17.4	17.4	59.471	0	26.105	91659000	29	21	AT2G35040.2;AT2G35040.1	AT2G35040.2;AT2G35040.1	708
26.2054	26.0975	26.2753	26.6499	26.3582	27.2859				-1	45	41	40	40.7	37.9	37.4	139.7	0	323.31	4480100000	53	195	AT2G35050.2;AT2G35050.1	AT2G35050.2;AT2G35050.1	709
25.2718	25.8019	25.7517	25.0619	27.0225	25.4366				-1	4	4	4	12.4	12.4	12.4	44.686	0	38.93	631830000	16	32	AT2G35230.1;AT2G35230.3;AT2G35230.2	AT2G35230.1;AT2G35230.3	711
26.3748	26.3388	26.7585	26.3317	27.0851	26.5516				-1	15	15	15	55.3	55.3	55.3	42.687	0	121.66	1955300000	19	62	AT2G35500.1	AT2G35500.1	714
25.8716	25.6773	25.878	26.462	26.4153	25.0735				-1	34	34	34	42.7	42.7	42.7	114.64	0	267.58	2554400000	54	140	AT2G35920.3;AT2G35920.1;AT2G35920.2	AT2G35920.3;AT2G35920.1;AT2G35920.2	719
NaN	22.2211	22.152	22.5933	NaN	22.4752				-1	6	6	6	17.5	17.5	17.5	53.645	0	22.289	49303000	26	13	AT2G36070.1	AT2G36070.1	721
24.524	24.4798	24.6991	24.5564	NaN	25.0464				-1	12	12	7	46.9	46.9	25.7	41.583	0	71.338	282610000	16	34	AT2G36250.4;AT2G36250.3;AT2G36250.2;AT2G36250.1	AT2G36250.4;AT2G36250.3;AT2G36250.2;AT2G36250.1	725
26.2971	26.6337	25.9958	26.2989	25.7451	26.7818				-1	22	12	12	79.3	46.6	46.6	38.386	0	121.91	1716500000	23	47	AT2G36460.1;AT2G36460.3;AT2G36460.2;AT5G03690.2;AT5G03690.1;AT4G26530.3;AT4G26530.2;AT4G26530.1;AT5G03690.4;AT5G03690.3	AT2G36460.1;AT2G36460.3;AT2G36460.2	726
25.4589	25.5772	24.9592	25.8579	24.7872	26.3852				-1	19	19	19	62.8	62.8	62.8	47.719	0	127.58	964530000	25	56	AT2G36530.1;AT2G36530.2	AT2G36530.1;AT2G36530.2	727
25.1607	25.0774	25.289	24.6956	NaN	NaN				-1	12	4	4	46.7	17.9	17.9	42.497	0	41.779	236690000	20	13	AT2G36880.2;AT2G36880.1	AT2G36880.2;AT2G36880.1	729
26.5915	26.6546	26.3977	26.4291	26.4565	26.4999				-1	15	15	3	51.2	51.2	15.9	22.99	0	55.386	1721700000	11	72	AT2G37270.2;AT2G37270.1	AT2G37270.2;AT2G37270.1	733
26.0461	25.8998	25.8246	25.6734	25.6463	26.2392				-1	23	8	4	67.1	30.5	18.6	41.797	0	69.94	1058400000	21	33	AT3G53750.2;AT3G53750.1;AT2G37620.4;AT2G37620.3;AT2G37620.2;AT2G37620.1	AT3G53750.2;AT3G53750.1;AT2G37620.4;AT2G37620.3;AT2G37620.2;AT2G37620.1	734
27.9602	27.9216	27.8184	27.8835	27.9243	27.7871				-1	13	13	13	36.7	36.7	36.7	34.307	0	66.62	4463800000	12	103	AT2G38250.1	AT2G38250.1	737
27.6174	27.2553	27.5423	27.2033	27.2185	27.3222				-1	14	14	14	43.8	43.8	43.8	35.647	0	77.591	3478600000	14	79	AT2G39050.1	AT2G39050.1	745
26.613	26.556	26.4129	26.2594	26.5914	26.4545				-1	8	8	8	39.2	39.2	39.2	16.744	0	21.845	990460000	5	37	AT3G55280.3;AT3G55280.2;AT3G55280.1;AT2G39460.2;AT2G39460.1	AT3G55280.3;AT3G55280.2;AT3G55280.1;AT2G39460.2;AT2G39460.1	750
25.616	25.5779	25.5922	25.5475	25.1597	25.5528				-1	21	21	21	63.7	63.7	63.7	51.981	0	229.57	1031600000	21	70	AT2G39730.1;AT2G39730.3;AT2G39730.2	AT2G39730.1;AT2G39730.3;AT2G39730.2	752
25.1679	24.9622	25.3003	25.2866	24.074	25.1903				-1	11	11	11	64.5	64.5	64.5	31.862	0	117.22	630720000	16	50	AT2G39990.1	AT2G39990.1	755
23.8626	23.5689	23.5763	22.6485	NaN	NaN				-1	4	4	4	20.9	20.9	20.9	28.837	0	7.4352	69320000	11	10	AT2G40060.1	AT2G40060.1	756
23.1271	23.4108	23.3936	23.4167	NaN	23.5926				-1	8	8	8	25	25	25	38.747	0	48.195	161810000	20	26	AT2G40290.1;AT2G40290.3;AT2G40290.2	AT2G40290.1;AT2G40290.3;AT2G40290.2	759
26.377	26.2455	26.0515	26.1249	26.6271	26.1899				-1	5	5	3	42.7	42.7	24.4	14.729	0	18.257	480130000	6	22	AT2G40590.1;AT2G40510.1	AT2G40590.1;AT2G40510.1	761
23.1842	22.9152	22.904	24.081	NaN	NaN				-1	8	8	8	25.9	25.9	25.9	43.172	0	25.058	113790000	17	16	AT2G40650.1	AT2G40650.1	763
24.0014	23.5971	23.3141	23.5014	NaN	24.1996				-1	8	8	8	28.3	28.3	28.3	42.088	0	39.757	197530000	24	28	AT2G40660.1	AT2G40660.1	764
24.6629	NaN	24.4922	24.037	NaN	NaN				-1	7	7	7	24.7	24.7	24.7	39.23	0	46.564	157270000	18	11	AT2G41040.1	AT2G41040.1	767
22.0657	21.3575	21.6504	NaN	NaN	NaN				-1	2	2	2	4.9	4.9	4.9	72.815	0	5.7056	19431000	37	6	AT2G41080.1	AT2G41080.1	769
NaN	23.4956	23.0956	24.165	NaN	24.5486				-1	19	19	19	14.7	14.7	14.7	177.75	0	60.719	165680000	88	32	AT2G41220.1;AT5G04140.1;AT5G04140.2	AT2G41220.1	770
24.3494	24.2162	24.5793	24.6425	24.4857	24.9438				-1	3	3	3	18.4	18.4	18.4	18.411	0	13.835	211360000	4	14	AT2G41430.5;AT2G41430.4;AT2G41430.2;AT2G41430.1;AT2G41430.3	AT2G41430.5;AT2G41430.4;AT2G41430.2;AT2G41430.1;AT2G41430.3	772
26.721	26.792	26.554	26.7188	26.1338	26.3393				-1	17	17	6	55.8	55.8	23.9	30.878	0	77.931	3139400000	16	82	AT2G41840.1	AT2G41840.1	776
31.0198	30.8336	31.0215	31.0125	30.9552	31.2756				-1	53	53	30	68.7	68.7	48	67.625	0	323.31	142090000000	34	610	AT2G42520.3;AT2G42520.2;AT2G42520.1	AT2G42520.3;AT2G42520.2;AT2G42520.1	781
22.8351	23.1876	23.0211	22.33	NaN	NaN				-1	5	5	5	13.9	13.9	13.9	43.165	0	11.811	87783000	17	15	AT2G42570.1	AT2G42570.1	782
26.0386	26.0766	26.218	25.8147	26.4032	25.3848				-1	9	9	9	66.7	66.7	66.7	19.791	0	69.48	734480000	9	35	AT2G42610.2;AT2G42610.1;AT5G58500.1;AT5G28490.1;AT4G18610.1;AT3G23290.2;AT1G07090.1;AT3G04510.1;AT2G31160.1;AT1G16910.1;AT1G78815.1	AT2G42610.2;AT2G42610.1	784
22.9871	22.9144	23.312	22.8348	NaN	23.7589				-1	6	6	6	21.9	21.9	21.9	45.78	0	22.63	99195000	22	17	AT2G42710.1	AT2G42710.1	786
27.1252	27.0999	27.2089	27.27	26.5904	27.6051				-1	5	5	5	39	39	39	19.775	0	26.875	1496900000	7	19	AT5G45775.1;AT5G45775.2;AT4G18730.1;AT3G58700.1;AT2G42740.1	AT5G45775.1;AT5G45775.2;AT4G18730.1;AT3G58700.1;AT2G42740.1	787
23.2124	23.6113	NaN	23.5983	NaN	23.2215				-1	11	11	11	31.2	31.2	31.2	54.702	0	47.452	131240000	27	20	AT2G42810.5;AT2G42810.4;AT2G42810.1;AT2G42810.3;AT2G42810.2	AT2G42810.5;AT2G42810.4;AT2G42810.1;AT2G42810.3;AT2G42810.2	789
24.6339	24.3253	25.0493	24.7681	23.6388	24.7753				-1	13	13	13	46.3	46.3	46.3	37.56	0	62.647	492560000	19	37	AT2G42910.1	AT2G42910.1	791
25.0749	25.2724	24.8223	24.8739	24.518	25.6351				-1	8	8	7	41.8	41.8	36.7	26.79	0	72.523	607240000	16	34	AT2G43090.1;AT2G43090.2;AT2G43100.1	AT2G43090.1;AT2G43090.2	792
29.523	29.4498	29.2633	29.7782	28.9512	29.4884				-1	20	20	6	86.1	86.1	39.2	33.803	0	323.31	17287000000	14	147	AT2G43140.2;AT2G42280.1;AT2G42280.3	AT2G43140.2	794
23.5145	22.9758	23.2663	23.3952	NaN	NaN				-1	6	6	6	25.7	25.7	25.7	41.681	0	29.223	136360000	20	20	AT2G43360.1	AT2G43360.1	796
23.9037	24.2034	24.2167	24.0274	23.6609	24.0172				-1	12	12	7	36.7	36.7	25.4	45.65	0	47.857	328040000	23	34	AT2G43710.2;AT2G43710.1;AT5G16230.2;AT3G02620.3;AT5G16230.1;AT3G02620.1;AT3G02620.2;AT3G02610.1;AT3G02610.2	AT2G43710.2;AT2G43710.1	801
24.4803	25.0588	24.4091	24.8141	23.7872	24.8822				-1	11	11	10	40.6	40.6	37.5	41.656	0	66.576	639430000	23	33	AT2G43750.2;AT2G43750.1	AT2G43750.2;AT2G43750.1	802
NaN	22.403	NaN	22.5272	NaN	22.9462				-1	4	4	4	20.7	20.7	20.7	37.885	0	14.463	65186000	19	11	AT2G43770.1	AT2G43770.1	803
NaN	24.0049	NaN	23.9326	NaN	24.4423				-1	4	4	4	15.9	15.9	15.9	37.55	0	9.648	116490000	16	9	AT2G44040.1;AT3G59890.2;AT3G59890.1	AT2G44040.1;AT3G59890.2;AT3G59890.1	808
24.6434	25.2346	25.3858	25.4485	24.2763	NaN				-1	4	4	4	17.2	17.2	17.2	24.024	0	16.949	369540000	12	18	AT2G44050.1	AT2G44050.1	809
25.5843	25.8477	25.5395	25.7761	25.5072	25.9822				-1	18	18	18	62.2	62.2	62.2	36.036	0	113.64	1684900000	23	80	AT2G44060.2;AT2G44060.1	AT2G44060.2;AT2G44060.1	810
23.8665	24.2413	23.7049	24.5107	NaN	24.491				-1	13	7	6	42	24.1	18.8	48.438	0	52.334	281120000	21	25	AT2G44100.2;AT2G44100.1	AT2G44100.2;AT2G44100.1	811
23.1718	23.1697	22.7806	23.322	NaN	23.4794				-1	6	6	3	12	12	6.9	66.801	0	21.179	101410000	36	16	AT2G44160.1	AT2G44160.1	813
23.9777	24.0931	23.938	23.5954	NaN	24.2819				-1	11	11	11	30	30	30	52.654	0	39.687	217090000	23	28	AT2G44350.4;AT2G44350.1;AT2G44350.3;AT2G44350.2;AT3G60100.1;AT3G60100.2	AT2G44350.4;AT2G44350.1;AT2G44350.3;AT2G44350.2	816
22.6118	21.8838	22.3934	23.1488	NaN	NaN				-1	8	5	4	26.7	19.6	16.8	42.496	0	21.891	80657000	18	14	AT2G44530.2;AT2G44530.1	AT2G44530.2;AT2G44530.1	817
24.0691	23.6814	23.6535	23.943	NaN	23.8257				-1	9	9	9	31.2	31.2	31.2	43.992	0	36.382	180220000	25	20	AT2G45240.1;AT2G45240.2	AT2G45240.1;AT2G45240.2	821
23.7878	24.0323	23.598	24.1189	NaN	24.9553				-1	14	8	8	28.9	19.7	19.7	79.921	0	79.318	282350000	33	25	AT2G45290.2;AT2G45290.1	AT2G45290.2;AT2G45290.1	822
23.775	24.2266	24.0807	24.0706	NaN	23.9738				-1	10	10	3	23.5	23.5	7.1	55.733	0	33.435	328760000	25	39	AT2G45300.4;AT2G45300.2;AT2G45300.1;AT2G45300.3	AT2G45300.4;AT2G45300.2;AT2G45300.1;AT2G45300.3	823
23.4033	23.2045	23.0928	23.7099	22.9847	23.9977				-1	6	6	6	22.5	22.5	22.5	40.292	0	20.285	113340000	16	20	AT2G45440.1;AT3G60880.1;AT3G60880.2	AT2G45440.1;AT3G60880.1;AT3G60880.2	825
26.059	26.5748	26.0752	26.6756	NaN	26.8363				-1	3	3	2	45.2	45.2	29.8	9.405	0	18.981	658950000	3	18	AT2G45710.1;AT3G61110.1;AT3G61111.2;AT3G61111.1	AT2G45710.1;AT3G61110.1	828
24.0359	23.7413	23.9301	23.9466	23.6852	23.582				-1	13	5	4	30.1	14.8	12.1	60.42	0	27.865	132100000	28	19	AT2G45810.1	AT2G45810.1	830
24.8236	24.8117	25.1324	25.2863	24.8214	25.2005				-1	48	48	48	28.8	28.8	28.8	245.44	0	234.82	1564700000	106	157	AT2G46020.6;AT2G46020.5;AT2G46020.1;AT2G46020.4;AT2G46020.3;AT2G46020.2	AT2G46020.6;AT2G46020.5;AT2G46020.1;AT2G46020.4;AT2G46020.3;AT2G46020.2	832
24.5785	24.7328	24.678	24.8432	24.5098	24.6134				-1	10	10	10	44.8	44.8	44.8	36.388	0	71.984	505690000	17	38	AT2G46280.2;AT2G46280.1;AT2G46280.3;AT2G46290.1	AT2G46280.2;AT2G46280.1;AT2G46280.3	834
24.0838	24.0532	24.1648	24.1704	23.1782	24.8902				-1	16	16	16	21.8	21.8	21.8	108.66	0	58.386	316150000	49	41	AT2G46520.1	AT2G46520.1	835
22.1858	22.616	22.5114	23.5871	NaN	22.8394				-1	14	14	14	26	26	26	71.421	0	68.139	110550000	31	38	AT2G46900.1	AT2G46900.1	836
27.5507	27.1997	26.5546	26.6508	26.726	26.7035				-1	7	7	7	50.3	50.3	50.3	17.797	0	32.172	1503900000	7	30	AT3G62250.1;AT2G47110.1;AT2G47110.2;AT1G23410.1;AT4G05320.2;AT5G20620.1;AT4G05320.3;AT4G05320.6;AT3G52590.1;AT2G36170.1;AT4G05320.4;AT1G65350.1;AT5G03240.1;AT5G03240.3;AT5G20620.2;AT5G03240.2;AT4G05320.5;AT4G05320.1;AT4G02890.4;AT4G02890.3;AT4G05320.8;AT4G05050.4;AT4G05320.7;AT2G35635.1;AT1G31340.1;AT5G37640.1;AT4G02890.1;AT4G02890.2;AT4G05050.1;AT4G05050.2;AT4G05050.3;AT1G55060.1;AT3G09790.1;AT3…	AT3G62250.1;AT2G47110.1;AT2G47110.2;AT1G23410.1;AT4G05320.2;AT5G20620.1;AT4G05320.3;AT4G05320.6;AT3G52590.1;AT2G36170.1;AT4G05320.4;AT1G65350.1;AT5G03240.1;AT5G03240.3;AT5G20620.2;AT5G03240.2;AT4G05320.5;AT4G05320.1;AT4G02890.4;AT4G02890.3;AT4G05320.8;AT4G05050.4;AT4G05320.7;AT2G35635.1;AT1G31340.1;AT5G37640.1;AT4G02890.1;AT4G02890.2;AT4G05050.1;AT4G05050.2;AT4G05050.3;AT1G55060.1	838
NaN	23.3456	23.4197	23.0125	NaN	23.3987				-1	7	7	6	22.9	22.9	20.7	35.62	0	13.077	87173000	18	11	AT2G47470.3;AT2G47470.1;AT2G47470.4;AT2G47470.2	AT2G47470.3;AT2G47470.1;AT2G47470.4;AT2G47470.2	839
NaN	23.1211	23.3365	23.1731	NaN	22.8602				-1	4	4	1	44	44	11	12.635	0	9.374	58907000	6	14	AT3G62840.1;AT2G47640.4;AT2G47640.1	AT3G62840.1;AT2G47640.4;AT2G47640.1	843
24.4493	24.6817	24.2269	24.9096	NaN	25.7836				-1	8	8	6	35.9	35.9	31.5	29.425	0	40.037	438160000	14	25	AT3G01280.1	AT3G01280.1	848
23.8353	NaN	23.766	23.8547	NaN	23.9443				-1	4	4	3	24.5	24.5	20.5	32.63	0	15.342	98858000	16	11	AT3G01340.2;AT3G01340.1	AT3G01340.2;AT3G01340.1	849
23.6729	23.7954	23.5845	23.5008	NaN	24.3207				-1	10	8	7	16.7	14.7	12.9	67.64	0	24.313	144920000	37	26	AT3G01540.1;AT3G01540.4;AT3G01540.3;AT3G01540.2;AT5G14610.4;AT5G14610.7;AT5G14610.3;AT5G14610.6;AT5G14610.2;AT5G14610.5;AT5G14610.1	AT3G01540.1;AT3G01540.4;AT3G01540.3;AT3G01540.2	850
22.9378	23.6017	23.477	23.778	23.9577	23.6768				-1	11	11	11	30.1	30.1	30.1	55.492	0	50.515	187730000	23	35	AT3G01560.1;AT3G01560.2	AT3G01560.1;AT3G01560.2	851
28.0775	27.9672	28.1531	21.8421	22.7261	21.9693				-1	60	60	60	56.2	56.2	56.2	130.91	0	323.31	10076000000	63	202	AT3G01780.1;AT3G01780.2	AT3G01780.1;AT3G01780.2	852
23.7001	23.0413	23.3776	22.9073	23.4453	23.0216				-1	8	7	7	23.4	21.2	21.2	51.328	0	26.449	135970000	20	20	AT3G01890.1	AT3G01890.1	854
24.7034	24.4633	24.8538	24.5203	24.8144	NaN				-1	5	5	2	35	35	19.6	15.828	0	61.459	310060000	9	24	AT3G02080.1	AT3G02080.1	856
24.087	23.8449	23.4171	23.5268	NaN	23.8811				-1	12	12	12	30.3	30.3	30.3	59.159	0	48.606	218910000	27	35	AT3G02090.1;AT3G02090.2	AT3G02090.1;AT3G02090.2	857
23.9112	23.3566	23.5959	23.4671	NaN	23.4322				-1	12	12	11	35.5	35.5	33.8	46.784	0	46.446	160030000	24	22	AT3G02200.2;AT3G02200.1	AT3G02200.2;AT3G02200.1	858
22.7081	23.2751	22.9386	23.2644	NaN	NaN				-1	27	27	27	7.1	7.1	7.1	565.6	0	65.358	154070000	258	37	AT3G02260.2;AT3G02260.3;AT3G02260.4;AT3G02260.1	AT3G02260.2;AT3G02260.3;AT3G02260.4;AT3G02260.1	860
25.1588	24.981	25.4079	25.0998	23.3831	25.6964				-1	18	18	4	45.4	45.4	12.5	58.949	0	103.7	798750000	29	56	AT3G02530.1	AT3G02530.1	862
23.5046	23.234	NaN	23.1204	NaN	NaN				-1	7	4	4	34.6	24.6	24.6	22.196	0	35.313	88755000	8	10	AT3G02560.3;AT3G02560.2;AT3G02560.1	AT3G02560.3;AT3G02560.2;AT3G02560.1	863
22.7528	22.4374	23.0664	NaN	NaN	NaN				-1	5	5	5	8.3	8.3	8.3	63.837	0	8.1627	71012000	31	14	AT3G02650.1	AT3G02650.1	865
23.1458	23.4468	23.5156	22.5795	NaN	23.0315				-1	11	9	2	22.1	19.5	4.4	77.993	0	36.242	124920000	38	22	AT3G03940.1	AT3G03940.1	873
25.1944	25.4984	25.2352	25.5687	24.9958	25.1162				-1	22	22	22	53.6	53.6	53.6	58.939	0	162.75	1043300000	32	69	AT3G03960.1	AT3G03960.1	875
29.0627	29.1353	29.1275	29.3	28.6628	29.3861				-1	27	27	4	77.8	77.8	17.2	36.914	0	267.89	16436000000	21	161	AT3G04120.1	AT3G04120.1	876
NaN	NaN	22.3208	22.4119	NaN	23.024				-1	4	4	4	8.9	8.9	8.9	60.577	0	8.7535	49458000	18	12	AT3G04610.4;AT3G04610.3;AT3G04610.2;AT3G04610.1	AT3G04610.4;AT3G04610.3;AT3G04610.2;AT3G04610.1	878
27.0259	27.2374	26.8259	26.4611	25.9609	27.1435				-1	13	8	8	48.1	33.2	33.2	29.85	0	83.902	1622200000	15	40	AT3G04840.1	AT3G04840.1	879
26.3973	26.0238	26.0128	26.233	25.2523	24.686				-1	6	6	4	37.5	37.5	26.8	12.909	0	27.385	896290000	5	32	AT3G04920.2;AT3G04920.1	AT3G04920.2;AT3G04920.1	881
21.9867	23.2736	22.7442	24.3191	NaN	NaN				-1	7	7	2	18	18	5.8	59.002	0	26.365	83716000	26	12	AT3G05060.1	AT3G05060.1	883
25.1813	25.1172	25.1746	25.6189	24.3666	25.1991				-1	19	19	18	64.4	64.4	61.6	47.48	0	159.8	924020000	25	62	AT3G05530.1;AT1G09100.1	AT3G05530.1;AT1G09100.1	885
26.551	26.5395	26.3503	26.2462	26.324	26.3249				-1	8	8	2	60.5	60.5	20.2	14.018	0	22.671	1058500000	6	33	AT3G05560.3;AT3G05560.2;AT3G05560.1	AT3G05560.3;AT3G05560.2;AT3G05560.1	886
24.2264	24.4107	24.1694	24.3131	24.2173	24.7627				-1	8	8	8	51.2	51.2	51.2	21.445	0	47.389	347460000	12	30	AT3G06050.1;AT3G06050.2	AT3G06050.1;AT3G06050.2	888
22.0105	22.1661	22.3845	23.1366	NaN	22.0376				-1	9	8	8	9.6	8.8	8.8	122.43	0	17.155	76262000	55	12	AT3G06400.1;AT3G06400.2;AT3G06400.3;AT5G18620.1;AT5G18620.2	AT3G06400.1;AT3G06400.2;AT3G06400.3;AT5G18620.1;AT5G18620.2	889
22.9162	22.91	23.1695	21.5578	NaN	NaN				-1	6	6	6	18.8	18.8	18.8	52.706	0	25.327	61940000	25	16	AT3G06850.2;AT3G06850.1	AT3G06850.2;AT3G06850.1	896
22.5757	22.8492	22.8117	22.6419	NaN	23.5589				-1	10	10	10	19.7	19.7	19.7	78.839	0	29.267	107150000	39	23	AT3G06860.1	AT3G06860.1	897
24.7489	24.6737	25.0021	24.6967	NaN	24.2549				-1	10	10	10	24.3	24.3	24.3	59.786	0	51.707	399510000	24	25	AT3G06930.1;AT3G06930.2	AT3G06930.1;AT3G06930.2	898
24.6405	24.5368	24.1975	23.8073	NaN	24.598				-1	7	7	7	19.3	19.3	19.3	42.501	0	50.382	346860000	25	28	AT3G07030.1;AT3G07030.3;AT3G07030.2;AT3G07030.4;AT3G07030.5	AT3G07030.1;AT3G07030.3;AT3G07030.2;AT3G07030.4;AT3G07030.5	899
23.3193	23.1328	23.6197	23.5238	NaN	23.4052				-1	18	18	18	22.3	22.3	22.3	113.96	0	58.338	278850000	45	46	AT3G07100.1	AT3G07100.1	901
25.1113	25.1671	25.104	25.2618	25.9214	25.1614				-1	9	6	4	45.6	29.1	18.4	23.466	0	15.063	409400000	11	22	AT3G07110.1;AT3G07110.2	AT3G07110.1;AT3G07110.2	902
25.932	25.8377	26.0151	26.1997	26.1788	26.4567				-1	15	15	15	55	55	55	35.993	0	108.08	1205800000	20	69	AT3G07220.1;AT3G07260.1	AT3G07220.1	903
29.8409	29.8422	30.0543	29.5054	31.5231	29.7448				-1	40	40	40	51.2	51.2	51.2	90.075	0	323.31	47948000000	32	354	AT3G07660.1	AT3G07660.1	907
24.4053	24.2706	24.1369	24.8043	22.2152	24.8919				-1	26	22	21	40.7	35.8	35.8	90.566	0	133.18	690390000	47	70	AT3G07770.3;AT3G07770.2;AT3G07770.1	AT3G07770.3;AT3G07770.2;AT3G07770.1	909
24.2033	24.127	24.519	24.1415	24.0556	22.6566				-1	13	13	13	39.8	39.8	39.8	45.322	0	37.572	409630000	24	41	AT3G07890.5;AT3G07890.4;AT3G07890.3;AT3G07890.2;AT3G07890.1	AT3G07890.5;AT3G07890.4;AT3G07890.3;AT3G07890.2;AT3G07890.1	911
23.9217	23.9497	23.9385	24.3199	NaN	24.5632				-1	13	13	13	55.3	55.3	55.3	39.065	0	43.895	306810000	17	31	AT3G08030.1;AT3G08030.2	AT3G08030.1;AT3G08030.2	912
25.4576	25.4563	25.7798	25.1096	23.4452	24.1868				-1	78	17	17	57.7	14.7	14.7	193.27	0	158.49	1036600000	88	65	AT3G08530.1;REV__AT1G69270.1	AT3G08530.1	913
25.3471	25.7594	25.5592	25.7584	25.5547	25.7785				-1	13	13	8	31.8	31.8	20.2	41.475	0	52.446	1440400000	22	57	AT3G08580.2;AT3G08580.1	AT3G08580.2;AT3G08580.1	914
24.4402	25.2909	25.0797	24.5982	NaN	25.3215				-1	19	19	13	56.2	56.2	40.4	60.763	0	160.28	594010000	32	43	AT3G08590.2;AT3G08590.1	AT3G08590.2;AT3G08590.1	915
24.8382	24.4589	24.8411	23.2157	24.381	22.6493				-1	7	7	5	11.1	11.1	8.2	94.127	0	52.042	155620000	34	21	AT3G08943.1	AT3G08943.1	917
27.8786	27.736	27.6211	27.7395	27.0358	27.62				-1	15	15	5	70.6	70.6	24.4	34.133	0	148.5	4262200000	9	89	AT3G09200.1;AT3G09200.2;AT2G40010.1	AT3G09200.1;AT3G09200.2	920
29.7109	29.6618	29.6799	29.5036	29.6619	29.9653				-1	49	49	24	69.2	69.2	33	71.147	0	323.31	34146000000	37	311	AT3G09440.4;AT3G09440.3;AT3G09440.2;AT3G09440.1	AT3G09440.4;AT3G09440.3;AT3G09440.2;AT3G09440.1	921
25.0754	25.1767	24.927	NaN	NaN	NaN				-1	5	5	1	30.1	30.1	9.8	14.285	0	13.626	235030000	6	11	AT3G09500.1;AT3G55170.4;AT3G55170.3;AT3G55170.5;AT3G55170.2;AT3G55170.1	AT3G09500.1	922
26.7789	26.7894	26.4526	26.6373	26.0649	27.0751				-1	23	23	8	52.2	52.2	16.7	44.702	0	127.57	4584100000	19	121	AT3G09630.1;AT3G09630.2	AT3G09630.1;AT3G09630.2	923
25.0842	24.662	NaN	24.8437	NaN	25.6789				-1	9	9	9	31.7	31.7	31.7	37.836	0	35.926	271070000	17	22	AT3G09820.1;AT3G09820.2;AT5G03300.1;AT5G03300.3;AT5G03300.2	AT3G09820.1;AT3G09820.2;AT5G03300.1;AT5G03300.3;AT5G03300.2	925
27.4637	27.3159	27.4042	27.3689	27.2182	27.6674				-1	55	55	13	71.7	71.7	21.6	89.392	0	323.31	9339900000	43	282	AT3G09840.1	AT3G09840.1	926
22.6198	NaN	22.6077	NaN	22.9819	NaN				-1	6	6	6	12.1	12.1	12.1	57.709	0	16.985	34897000	23	15	AT3G10070.1	AT3G10070.1	928
25.843	25.8674	25.7465	26.6053	25.4904	25.3727				-1	2	2	1	29.7	29.7	18.8	7.3705	0	13.444	419080000	2	11	AT5G03850.1;AT3G10090.1	AT5G03850.1;AT3G10090.1	930
23.7902	23.1895	23.3793	23.4447	NaN	24.1812				-1	17	17	17	21.6	21.6	21.6	104.54	0	83.067	298050000	45	43	AT3G10690.1	AT3G10690.1	939
NaN	23.4844	22.9156	NaN	NaN	23.5696				-1	3	3	3	18.3	18.3	18.3	25.344	0	17.061	101340000	9	11	AT3G10920.2;AT3G10920.1	AT3G10920.2;AT3G10920.1	941
26.9012	26.7599	26.6968	25.8942	25.161	25.9906				-1	80	80	19	59.4	59.4	17.3	193.24	0	323.31	7095000000	88	295	AT3G11130.1	AT3G11130.1	943
22.9833	NaN	22.2148	23.1425	NaN	NaN				-1	2	2	2	11.4	11.4	11.4	27.832	0	26.854	41776000	8	8	AT3G11200.1;AT3G11200.2	AT3G11200.1;AT3G11200.2	944
23.9173	23.7403	23.8305	23.9437	NaN	24.0428				-1	9	9	9	47.3	47.3	47.3	32.714	0	71.978	258860000	19	19	AT3G11400.1;AT3G11400.2;AT5G06000.1	AT3G11400.1;AT3G11400.2	947
26.772	26.9322	26.568	26.7428	26.441	27.0677				-1	8	8	1	48	48	7.3	16.273	0	52.721	1921200000	6	46	AT3G11510.1	AT3G11510.1	948
23.5849	23.7812	23.8808	23.4467	NaN	23.1191				-1	6	6	3	27.4	27.4	14.3	29.092	0	19.935	170810000	15	21	AT3G11630.1	AT3G11630.1	949
23.5722	23.753	23.4167	23.5613	NaN	23.6263				-1	13	13	13	28.1	28.1	28.1	70.887	0	75.915	197980000	33	25	AT3G11710.1	AT3G11710.1	950
25.141	24.5913	25.2835	25.0907	22.4906	24.6373				-1	19	19	19	43.8	43.8	43.8	59.776	0	91.611	786570000	33	66	AT3G11830.1;AT3G11830.2	AT3G11830.1;AT3G11830.2	954
24.3164	24.4507	24.6676	24.5467	23.4512	24.8745				-1	25	25	11	28	28	12.1	130.52	0	114.36	543070000	65	60	AT3G11910.4;AT3G11910.2;AT3G11910.3;AT3G11910.1	AT3G11910.4;AT3G11910.2;AT3G11910.3;AT3G11910.1	955
NaN	26.876	27.8065	NaN	NaN	26.8554				-1	14	2	2	56	20.3	20.3	22.921	0	90.913	781940000	11	10	AT3G11940.2;AT3G11940.1	AT3G11940.2;AT3G11940.1	956
24.6372	24.839	24.2188	24.2885	NaN	25.2318				-1	6	6	3	39.9	39.9	21.2	21.982	0	30.001	253710000	10	23	AT3G12390.1	AT3G12390.1	962
25.9419	25.8112	26.0173	26.0517	25.7659	26.292				-1	48	20	19	71.2	37.7	35.5	71.101	0	188.35	1578700000	37	68	AT3G12580.1	AT3G12580.1	964
23.9952	24.7373	24.2751	24.7882	NaN	25.0406				-1	18	15	8	48.2	39.9	23.3	50.111	0	48.619	439890000	33	45	AT3G12780.1	AT3G12780.1	966
23.8554	23.8778	23.6741	23.837	NaN	24.1746				-1	4	4	4	14.4	14.4	14.4	31.796	0	12.929	159150000	15	14	AT3G12800.1	AT3G12800.1	967
21.771	23.6259	23.7766	21.8795	NaN	22.7857				-1	8	8	8	22.3	22.3	22.3	44.927	0	20.874	110700000	25	25	AT3G13160.1;AT3G18970.1;AT1G09220.1;AT3G21470.1;AT5G44230.2;AT1G06143.1;AT1G59720.1;AT5G44230.1;AT4G13650.1	AT3G13160.1	969
24.6666	24.652	24.6341	25.3623	24.2856	25.2694				-1	13	13	13	43.3	43.3	43.3	37.864	0	92.293	586820000	20	55	AT3G13224.2;AT3G13224.3;AT3G13224.1	AT3G13224.2;AT3G13224.3;AT3G13224.1	971
22.1278	22.5406	22.6025	22.1096	NaN	23.105				-1	22	13	13	20.3	13.3	13.3	145.88	0	54.974	88968000	70	27	AT3G13290.1	AT3G13290.1	973
24.4466	24.3738	24.3039	24.5673	24.062	24.9146				-1	38	38	29	35	35	28.1	145.72	0	200.34	1089900000	72	128	AT3G13300.1;AT3G13300.2;AT3G13300.3	AT3G13300.1;AT3G13300.2;AT3G13300.3	974
24.3567	24.1541	24.1347	24.3227	NaN	24.6659				-1	13	13	11	27.3	27.3	23.5	72.474	0	104.86	361660000	28	38	AT3G13460.1;AT3G13460.2;AT3G13460.4;AT3G13460.3	AT3G13460.1;AT3G13460.2;AT3G13460.4;AT3G13460.3	976
27.0099	26.9835	27.0257	27.1071	26.9238	27.5091				-1	35	35	8	63.6	63.6	15.4	63.341	0	231.26	5143200000	34	164	AT3G13470.1;AT1G26230.5;AT1G26230.3;AT1G26230.2;AT1G26230.4;AT1G26230.1	AT3G13470.1	977
22.1067	NaN	22.6841	22.0313	NaN	NaN				-1	10	7	7	16.1	10	10	78.639	0	20.166	35745000	39	13	AT3G13670.1	AT3G13670.1	978
24.6795	24.5982	24.5982	24.9916	23.4586	25.2168				-1	26	26	26	54.9	54.9	54.9	60.466	0	141.13	948680000	35	84	AT3G13860.1	AT3G13860.1	979
25.7431	25.9938	25.3085	25.6438	25.5139	25.7633				-1	26	6	5	76	18.7	16.5	46.704	0	54.818	501060000	23	26	AT3G13920.1;AT3G13920.4;AT3G13920.3;AT3G13920.2;AT3G13920.5	AT3G13920.1;AT3G13920.4;AT3G13920.3;AT3G13920.2;AT3G13920.5	980
23.865	23.9189	23.47	23.8051	23.3041	24.3473				-1	12	12	12	27.5	27.5	27.5	58.467	0	34.415	284120000	32	40	AT3G13930.1;AT1G54220.2;AT1G54220.1	AT3G13930.1	981
23.0756	22.7094	22.6599	23.4919	NaN	23.6494				-1	8	8	8	15	15	15	92.168	0	33.996	123600000	35	20	AT3G13990.2;AT3G13990.1	AT3G13990.2;AT3G13990.1	982
NaN	24.3186	24.0695	24.1775	NaN	24.4122				-1	9	2	2	47.8	16.3	16.3	21.309	0	36.159	171160000	8	11	AT3G14600.1	AT3G14600.1	987
25.0144	25.2532	24.9717	25.3941	24.5668	25.081				-1	11	11	11	39.5	39.5	39.5	41.857	0	87.754	441150000	15	35	AT3G14990.1;AT3G14990.3;AT3G14990.2	AT3G14990.1;AT3G14990.3;AT3G14990.2	989
25.7269	25.9781	26.1533	25.993	26.3411	26.0004				-1	5	5	5	12.4	12.4	12.4	42.869	0	27.662	685330000	19	23	AT3G15000.1;AT1G53260.2;AT1G53260.1	AT3G15000.1	990
23.7874	24.1181	23.8909	24.2636	NaN	NaN				-1	7	7	7	18.6	18.6	18.6	41.779	0	42.908	168690000	15	24	AT3G15010.2;AT3G15010.1	AT3G15010.2;AT3G15010.1	991
31.1654	30.3556	30.2879	30.7628	29.9982	30.5848				-1	17	16	16	70.3	66.5	66.5	28.169	0	316.26	18528000000	10	106	AT3G15690.2;AT3G15690.1;AT3G15690.3	AT3G15690.2;AT3G15690.1;AT3G15690.3	994
24.448	24.0922	23.8543	24.2826	21.7555	23.0466				-1	20	20	20	38.8	38.8	38.8	91.847	0	116.39	452820000	44	47	AT3G15730.1;AT1G52570.3;AT1G52570.2;AT1G52570.1	AT3G15730.1	995
22.4099	NaN	NaN	22.5975	NaN	23.2627				-1	5	5	4	7.6	7.6	6.4	89.081	0	15.071	45836000	38	10	AT3G16630.1;AT3G16630.2;AT4G15885.1	AT3G16630.1;AT3G16630.2	999
26.9456	26.5285	26.6071	26.2142	25.3389	25.9942				-1	9	9	9	51.2	51.2	51.2	18.91	0	100.03	1111700000	9	34	AT3G16640.1	AT3G16640.1	1000
NaN	24.5415	24.1323	24.2057	24.2894	24.5911				-1	7	4	4	32.1	24.4	24.4	24.329	0	26.052	167070000	6	13	AT3G16780.1	AT3G16780.1	1001
25.8526	25.9857	25.9074	25.6993	24.8167	25.8401				-1	18	18	7	44.4	44.4	20.5	60.756	0	185.82	1183700000	27	71	AT3G16950.1;AT3G16950.2	AT3G16950.1;AT3G16950.2	1006
23.864	24.6409	23.9831	24.9126	23.964	23.7533				-1	5	5	4	49.1	49.1	41.2	13.276	0	27.704	129330000	7	18	AT3G16980.1	AT3G16980.1	1007
25.2224	25.9051	NaN	24.8966	NaN	NaN				-1	5	5	5	74.3	74.3	74.3	12.184	0	47.443	280920000	6	14	AT3G17210.2;AT3G17210.1	AT3G17210.2;AT3G17210.1	1012
24.2132	24.6558	24.0464	24.9942	24.0692	25.2157				-1	12	12	6	29.6	29.6	18.3	53.985	0	45.626	444650000	29	33	AT3G17240.3;AT3G17240.1	AT3G17240.3;AT3G17240.1	1013
27.4831	27.5796	27.5409	27.4284	26.7352	27.1165				-1	22	22	13	75.3	75.3	48.6	42.795	0	211.18	4523200000	20	112	AT3G17390.1	AT3G17390.1	1014
25.1522	24.0747	NaN	24.9949	NaN	24.1013				-1	8	8	4	28	28	18.4	38.594	0	54.159	211560000	15	19	AT3G17820.1;AT1G48470.1	AT3G17820.1	1016
26.5939	26.4283	26.5265	26.3646	26.0954	26.5191				-1	18	18	5	56.4	56.4	22.4	35.827	0	71.834	1848800000	20	78	AT3G18130.1	AT3G18130.1	1020
24.4338	24.9517	24.9798	24.7784	23.5853	25.0117				-1	17	17	17	43.1	43.1	43.1	57.775	0	82.834	683320000	33	54	AT3G18190.1	AT3G18190.1	1021
24.9347	25.0912	24.0095	24.8864	24.9147	25.8195				-1	4	4	1	37.5	37.5	12.5	12.279	0	21.509	336830000	5	20	AT3G18740.1	AT3G18740.1	1025
30.9063	30.7211	30.8529	31.1731	31.1317	31.2982				-1	18	18	16	51	51	47.4	48.118	0	323.31	16367000000	14	112	AT3G19130.1	AT3G19130.1	1029
24.1432	24.1946	24.2669	24.0513	NaN	23.7649				-1	13	12	10	37.5	35	30.1	45.844	0	33.479	297260000	26	35	AT3G19760.1	AT3G19760.1	1034
25.2416	25.3122	25.0948	24.9384	24.0329	25.0927				-1	23	23	23	58	58	58	59.229	0	121.27	740360000	31	66	AT3G20050.1	AT3G20050.1	1036
23.137	23.5975	23.2931	23.1226	NaN	23.6712				-1	5	5	5	34.2	34.2	34.2	19.816	0	23.829	120850000	15	17	AT3G20390.1;AT3G20390.2	AT3G20390.1;AT3G20390.2	1040
23.624	23.0692	NaN	22.9488	NaN	NaN				-1	7	7	7	15.6	15.6	15.6	66.092	0	22.014	74005000	31	13	AT3G21100.2;AT3G21100.1;AT3G21100.4;AT3G21100.3	AT3G21100.2;AT3G21100.1;AT3G21100.4;AT3G21100.3	1043
23.4568	NaN	23.4992	23.5867	NaN	23.7797				-1	5	3	3	23.6	15.3	15.3	24.005	0	7.1505	94883000	7	12	AT3G21175.3;AT3G21175.2;AT3G21175.1	AT3G21175.3;AT3G21175.2;AT3G21175.1	1046
24.113	24.2052	23.9102	23.9251	NaN	NaN				-1	10	10	10	35.9	35.9	35.9	55.187	0	58.156	220510000	25	23	AT3G22200.1;AT3G22200.2	AT3G22200.1;AT3G22200.2	1050
25.865	25.8447	25.6126	26.0195	25.343	25.5122				-1	5	5	2	34.1	34.1	14.1	15.614	0	14.616	508780000	6	20	AT3G22230.1;AT2G32220.1	AT3G22230.1	1051
23.6282	23.738	24.4814	24.185	24.2624	24.2171				-1	19	19	18	35.9	35.9	35	85.645	0	92.644	331620000	38	46	AT3G22270.1	AT3G22270.1	1052
24.9603	25.0454	25.1471	25.2053	24.7795	25.4081				-1	21	15	15	45.4	33.6	33.6	63.609	0	95.679	932580000	29	54	AT3G22310.1;AT3G22310.2	AT3G22310.1;AT3G22310.2	1054
25.7332	25.7333	25.9726	26.2759	25.8059	26.1954				-1	21	21	15	44	44	32.3	65.359	0	163.74	1330500000	38	80	AT3G22330.1	AT3G22330.1	1055
22.8561	23.2227	22.9446	23.0348	NaN	NaN				-1	5	5	5	17.5	17.5	17.5	39.979	0	14.134	84014000	25	11	AT3G22370.1;AT3G22360.1;AT3G27620.1;AT1G32350.1;AT1G32350.2;AT5G64210.1	AT3G22370.1;AT3G22360.1;AT3G27620.1	1056
22.0342	22.1091	21.979	22.606	21.9537	22.6601				-1	13	13	13	11.5	11.5	11.5	164.45	0	46.108	112510000	60	38	AT3G22380.1;AT3G22380.3;AT3G22380.2	AT3G22380.1;AT3G22380.3;AT3G22380.2	1057
23.5092	23.8294	23.9451	23.465	24.5573	23.8508				-1	17	17	17	37.3	37.3	37.3	67.57	0	75.686	248510000	28	44	AT3G22520.1	AT3G22520.1	1058
22.6783	22.7778	22.7168	22.9406	NaN	NaN				-1	5	5	4	19.4	19.4	14.9	27.107	0	11.352	86559000	13	9	AT3G22850.1	AT3G22850.1	1062
24.8408	24.9283	25.1375	25.0004	NaN	23.6261				-1	18	10	6	41.7	26.8	18.1	51.458	0	38.211	315710000	27	27	AT3G22890.1	AT3G22890.1	1063
23.3484	23.227	22.9796	23.4815	NaN	NaN				-1	9	9	9	20.3	20.3	20.3	65.13	0	35.741	144780000	28	21	AT3G22960.1	AT3G22960.1	1064
24.1996	24.7809	24.2446	24.1722	24.6599	NaN				-1	4	4	1	67.8	67.8	10.3	10.177	0	32.811	201270000	5	18	AT3G23325.1	AT3G23325.1	1066
NaN	22.8412	23.2475	22.398	NaN	22.62				-1	5	5	5	28.2	28.2	28.2	30.454	0	18.614	72679000	14	14	AT3G23400.1;AT3G23400.4;AT3G23400.3;AT3G23400.2	AT3G23400.1;AT3G23400.4;AT3G23400.3;AT3G23400.2	1068
23.5703	23.5529	23.6532	23.5031	NaN	23.7674				-1	6	6	6	34.3	34.3	34.3	25.861	0	26.309	210030000	16	22	AT3G23600.1;AT3G23600.2	AT3G23600.1;AT3G23600.2	1071
22.8897	NaN	NaN	23.0891	NaN	23.3437				-1	7	7	7	15.2	15.2	15.2	64.713	0	22.962	97182000	32	15	AT3G23940.2;AT3G23940.1	AT3G23940.2;AT3G23940.1	1073
27.2071	27.153	26.9955	27.4071	26.9108	27.5838				-1	34	34	17	67.1	67.1	40.2	61.28	0	306.01	7290400000	35	180	AT3G23990.1	AT3G23990.1	1074
26.7393	26.7831	26.4934	26.4453	26.5555	26.429				-1	12	12	5	53.4	53.4	24.3	23.459	0	54.331	1539900000	11	44	AT3G24830.1	AT3G24830.1	1080
21.9235	22.2948	22.0044	22.1908	NaN	22.4883				-1	8	8	8	21.7	21.7	21.7	52.874	0	21.597	57535000	23	18	AT3G25150.1;AT3G25150.2	AT3G25150.1;AT3G25150.2	1081
23.7946	24.1539	23.7369	23.7716	23.7864	24.296				-1	11	11	10	21.1	21.1	19.4	61.452	0	36.033	254710000	25	31	AT3G25230.1;AT3G25230.2	AT3G25230.1;AT3G25230.2	1083
24.5107	24.5901	24.2132	24.3849	NaN	24.5961				-1	15	3	3	38.9	4.7	4.7	34.358	0	13.921	187080000	10	13	AT3G25520.1;AT3G25520.3;AT3G25520.2	AT3G25520.1;AT3G25520.3;AT3G25520.2	1084
24.5424	25.3971	25.4335	24.7811	23.4695	24.1531				-1	10	10	6	25	25	12.9	65.597	0	32.474	269450000	30	33	AT3G25800.1;AT3G25800.3;AT3G25800.2	AT3G25800.1;AT3G25800.3;AT3G25800.2	1086
25.1421	24.9898	25.1021	25.2452	25.0549	25.8444				-1	14	14	12	42.5	42.5	37.3	50.08	0	79.404	967880000	23	67	AT3G25860.1	AT3G25860.1	1087
23.5359	NaN	23.6037	23.4942	NaN	23.6616				-1	3	3	3	11.4	11.4	11.4	26.923	0	18.139	109090000	9	8	AT3G26420.1	AT3G26420.1	1089
28.7117	28.6118	28.8074	28.4432	28.6633	28.7467				-1	29	29	29	52.8	52.8	52.8	56.461	0	264.14	11505000000	24	163	AT3G26990.1;AT3G26990.2;AT5G65180.1	AT3G26990.1;AT3G26990.2	1090
23.7563	23.3717	NaN	23.421	NaN	23.8452				-1	9	9	3	20.7	20.7	7	54.209	0	22.81	152180000	27	21	AT3G27190.1	AT3G27190.1	1091
23.3705	23.3821	23.2914	NaN	NaN	23.439				-1	6	6	6	28.3	28.3	28.3	31.171	0	25.973	121790000	14	18	AT3G27380.2;AT3G27380.1;AT5G40650.1;AT5G40650.2	AT3G27380.2;AT3G27380.1;AT5G40650.1	1093
23.9901	24.1112	24.0947	24.1684	24.7554	24.0794				-1	11	11	5	48.7	48.7	26	30.37	0	59.105	320270000	18	28	AT3G27460.2;AT3G27460.1;AT3G27460.4;AT3G27460.3;AT3G27460.5	AT3G27460.2;AT3G27460.1;AT3G27460.4;AT3G27460.3;AT3G27460.5	1097
NaN	22.8586	22.9393	NaN	NaN	23.1535				-1	7	7	7	18.8	18.8	18.8	47.058	0	21.847	70362000	19	14	AT3G27740.1;AT3G27740.2	AT3G27740.1;AT3G27740.2	1099
23.5045	24.0719	23.3711	23.2833	23.7339	NaN				-1	4	4	4	20.9	20.9	20.9	19.682	0	8.4612	85691000	11	13	AT3G27850.1;AT3G27830.2;AT3G27830.1	AT3G27850.1;AT3G27830.2;AT3G27830.1	1100
24.785	25.0999	24.9676	24.5716	25.1727	25.0721				-1	6	6	6	49.6	49.6	49.6	11.735	0	31.003	433030000	6	28	AT3G28500.1	AT3G28500.1	1102
23.8409	23.9473	23.6891	24.1076	23.3247	23.6475				-1	12	12	6	31.9	31.9	17.1	53.172	0	53.866	261710000	29	36	AT3G29360.2;AT3G29360.1;AT5G39320.1;AT1G26570.1	AT3G29360.2;AT3G29360.1	1104
23.1731	23.4434	23.6814	23.54	NaN	23.4087				-1	18	10	10	24.5	14.1	14.1	93.002	0	24.294	159850000	46	26	AT3G43190.2;AT3G43190.1;AT4G02280.1;AT5G49190.3;AT5G49190.2;AT5G49190.1	AT3G43190.2;AT3G43190.1	1110
23.1091	22.99	23.0146	23.5954	NaN	23.2636				-1	16	16	16	11.2	11.2	11.2	191.45	0	53.889	139930000	103	33	AT3G43300.2;AT3G43300.3;AT3G43300.1	AT3G43300.2;AT3G43300.3;AT3G43300.1	1111
26.7322	26.8149	26.7576	27.1526	26.3141	27.396				-1	22	22	11	51.7	51.7	35	46.444	0	160.01	2668300000	19	94	AT3G44110.1;AT3G44110.2	AT3G44110.1;AT3G44110.2	1113
22.7651	NaN	22.6995	22.4016	NaN	22.5899				-1	5	5	5	5.1	5.1	5.1	114.68	0	11.255	46693000	38	12	AT3G44340.5;AT3G44340.2;AT3G44340.4;AT3G44340.3;AT3G44340.1;AT4G32640.2;AT4G32640.1	AT3G44340.5;AT3G44340.2;AT3G44340.4;AT3G44340.3;AT3G44340.1;AT4G32640.2;AT4G32640.1	1116
26.7338	26.4318	26.4644	26.4274	26.5678	27.1978				-1	8	8	2	42.7	42.7	18.5	13.878	0	41.349	1100400000	6	42	AT5G62300.2;AT5G62300.1;AT3G45030.1	AT5G62300.2;AT5G62300.1;AT3G45030.1	1119
23.0575	22.6789	23.0429	23.0642	NaN	23.3462				-1	9	9	7	14.5	14.5	12.1	83.314	0	27.588	88192000	42	21	AT3G45190.2;AT3G45190.1;AT2G28360.1	AT3G45190.2;AT3G45190.1	1120
24.6776	24.6903	24.6281	NaN	NaN	24.1212				-1	2	2	2	7.6	7.6	7.6	27.359	0	7.8748	194190000	12	10	AT3G45590.2;AT3G45590.1	AT3G45590.2;AT3G45590.1	1121
23.5076	23.4378	23.64	24.0294	NaN	24.3596				-1	22	22	22	35.4	35.4	35.4	108.44	0	117.09	285330000	57	47	AT3G45630.2;AT3G45630.1	AT3G45630.2;AT3G45630.1	1122
24.4403	24.3138	24.7427	24.0674	NaN	NaN				-1	9	2	2	73.1	22.3	22.3	14.774	0	10.815	128970000	8	8	AT3G46040.1	AT3G46040.1	1127
22.4102	22.8025	22.4484	NaN	NaN	23.3119				-1	4	3	2	21.8	16.7	13	23.834	0	27.792	64878000	16	15	AT5G59840.1;AT3G46060.3;AT3G46060.2;AT3G46060.1;AT5G03520.1;AT5G03520.2	AT5G59840.1;AT3G46060.3;AT3G46060.2;AT3G46060.1;AT5G03520.1;AT5G03520.2	1128
26.3091	26.0937	25.8714	26.2124	25.4639	26.7542				-1	8	2	2	41.8	17.2	17.2	13.693	0	6.0647	457290000	6	12	AT3G47370.3;AT3G47370.2;AT3G47370.1	AT3G47370.3;AT3G47370.2;AT3G47370.1	1136
23.6351	24.0588	23.6981	24.0023	NaN	23.8031				-1	11	10	10	37	34.2	34.2	42.405	0	46.657	261300000	21	26	AT3G47520.1	AT3G47520.1	1137
23.8751	23.5788	23.4699	23.7157	NaN	24.3972				-1	13	13	13	32.9	32.9	32.9	58.588	0	72.678	255450000	29	27	AT3G48000.1;AT1G23800.2;AT1G23800.1	AT3G48000.1	1143
27.5365	27.397	27.5617	26.9562	27.3238	27.3689				-1	12	12	11	53	53	50	24.614	0	146.4	3114700000	12	74	AT3G48330.2;AT3G48330.1;AT3G48330.4;AT3G48330.3	AT3G48330.2;AT3G48330.1;AT3G48330.4;AT3G48330.3	1146
25.4542	25.2579	25.3534	25.4686	23.7228	25.3435				-1	23	23	23	40.1	40.1	40.1	72.584	0	132.52	1624000000	29	101	AT3G48560.1	AT3G48560.1	1147
NaN	23.4925	NaN	23.3217	NaN	23.2693				-1	5	5	5	16.5	16.5	16.5	50.141	0	37.471	81405000	19	12	AT3G48730.1;AT5G63570.1;AT5G63570.2	AT3G48730.1;AT5G63570.1;AT5G63570.2	1149
25.6861	25.667	25.8158	25.7694	25.7092	25.882				-1	38	38	13	53.7	53.7	18.6	102.24	0	275.4	2363600000	46	135	AT3G48870.2;AT3G48870.4;AT3G48870.3;AT3G48870.1;AT3G45450.1	AT3G48870.2;AT3G48870.4;AT3G48870.3;AT3G48870.1	1153
25.4775	25.3756	25.0846	24.8076	25.5331	25.5083				-1	9	9	3	44.4	44.4	20.6	17.957	0	21.467	668520000	9	43	AT3G48930.1	AT3G48930.1	1154
26.6082	26.3104	26.2725	26.0301	26.4982	26.2283				-1	10	10	5	53.9	53.9	32.8	23.539	0	89.591	1915900000	10	59	AT3G49010.4;AT3G49010.7;AT3G49010.6;AT3G49010.3;AT3G49010.2;AT3G49010.1;AT3G49010.5;AT3G48960.1	AT3G49010.4;AT3G49010.7;AT3G49010.6;AT3G49010.3;AT3G49010.2;AT3G49010.1;AT3G49010.5	1156
24.3613	24.2138	24.5641	24.4967	24.2064	23.9287				-1	11	11	11	19.2	19.2	19.2	71.292	0	48.594	340980000	37	33	AT3G49240.1	AT3G49240.1	1158
26.2914	26.6421	26.4294	26.3523	26.4187	26.3283				-1	6	6	5	42.5	42.5	37.7	16.944	0	31.49	1335400000	6	35	AT3G49910.1	AT3G49910.1	1163
28.4185	28.4028	28.4789	28.5049	28.4473	28.934				-1	113	113	113	52.4	52.4	52.4	236.76	0	323.31	36481000000	95	696	AT3G50370.2;AT3G50370.1	AT3G50370.2;AT3G50370.1	1164
27.1804	27.1079	27.2037	20.3774	NaN	20.2281				-1	58	58	58	48	48	48	174.99	0	323.31	5854900000	79	176	AT3G50590.2;AT3G50590.1	AT3G50590.2;AT3G50590.1	1165
24.2108	24.2636	24.277	23.9708	NaN	24.1033				-1	7	7	7	23.3	23.3	23.3	41.961	0	27.314	171310000	22	20	AT3G51160.1;AT5G66280.1	AT3G51160.1	1167
NaN	23.3515	23.1793	22.8268	NaN	23.4777				-1	6	6	6	34	34	34	27.337	0	27.748	123150000	15	15	AT3G51260.1;AT3G51260.2;AT5G66140.1	AT3G51260.1;AT3G51260.2;AT5G66140.1	1168
24.6298	25.0022	24.7762	24.7713	24.9917	25.4764				-1	4	4	4	17.1	17.1	17.1	29.21	0	14.748	206330000	15	15	AT3G51780.1	AT3G51780.1	1171
25.3852	25.1985	25.144	25.3189	NaN	25.6865				-1	15	15	15	44.2	44.2	44.2	42.295	0	57.36	725090000	21	46	AT3G51800.3;AT3G51800.1;AT3G51800.2	AT3G51800.3;AT3G51800.1;AT3G51800.2	1172
24.9374	24.6164	25.006	24.5894	24.2544	24.692				-1	27	27	27	25.9	25.9	25.9	153.26	0	229.59	692110000	62	61	AT3G52140.1;AT3G52140.2;AT3G52140.4;AT3G52140.3	AT3G52140.1;AT3G52140.2;AT3G52140.4;AT3G52140.3	1175
23.7769	23.6657	23.9415	23.5839	NaN	24.1727				-1	12	12	12	25	25	25	68.862	0	34.807	183660000	34	25	AT3G52200.1;AT3G52200.2	AT3G52200.1;AT3G52200.2	1178
25.0411	24.9599	25.1118	24.6197	NaN	NaN				-1	8	2	2	48	14	14	16.238	0	8.1215	210190000	6	11	AT3G52580.1	AT3G52580.1	1180
23.694	24.0755	23.4543	23.8938	NaN	24.6307				-1	9	9	9	26	26	26	46.487	0	54.419	221420000	27	19	AT3G52880.1;AT3G52880.2	AT3G52880.1;AT3G52880.2	1184
26.5696	26.8495	26.5401	26.7747	25.96	27.434				-1	23	23	13	80.4	80.4	47.5	38.539	0	225.15	3856300000	23	130	AT3G52930.1	AT3G52930.1	1185
25.0364	24.7626	25.7952	25.0637	NaN	25.4279				-1	8	8	8	41.5	41.5	41.5	24.684	0	56.022	284400000	16	17	AT3G52960.1	AT3G52960.1	1186
24.7315	25.0473	24.6072	25.112	NaN	25.7181				-1	12	12	4	34.2	34.2	14	57.495	0	85.697	429510000	30	41	AT3G52990.1;AT3G52990.2	AT3G52990.1;AT3G52990.2	1187
26.3672	26.2634	26.4504	26.3779	25.6738	25.0995				-1	6	6	6	26.4	26.4	26.4	18.632	0	27.034	665080000	5	19	AT3G53020.1;AT2G36620.1	AT3G53020.1;AT2G36620.1	1188
22.2612	NaN	22.7721	22.9061	NaN	NaN				-1	34	3	3	38.8	4.5	4.5	90.339	0	8.4998	43480000	42	11	AT3G53230.1	AT3G53230.1	1191
27.5013	27.4486	27.19	27.1615	27.0324	27.1743				-1	7	7	1	46.4	46.4	9.6	17.97	0	119.82	2031100000	9	41	AT3G53430.1	AT3G53430.1	1192
23.4251	23.3485	23.267	23.3753	NaN	23.7284				-1	6	6	6	17.7	17.7	17.7	38.984	0	17.846	145260000	20	17	AT3G53580.1	AT3G53580.1	1195
25.377	25.2675	25.3292	25.2798	25.4168	NaN				-1	16	5	4	67.9	31.3	25.7	27.349	0	13.688	393030000	16	16	AT3G53870.1	AT3G53870.1	1199
23.5666	23.7006	23.7321	23.5847	23.4586	23.7918				-1	6	6	6	22.9	22.9	22.9	32.662	0	19.845	160150000	18	19	AT3G54110.1	AT3G54110.1	1204
25.0091	24.9212	24.7556	24.9834	NaN	25.0869				-1	11	11	11	35.1	35.1	35.1	51.85	0	69.527	365460000	23	38	AT3G54470.1;AT1G12775.1	AT3G54470.1	1205
26.0349	25.9879	25.9576	26.15	25.8264	26.4964				-1	23	23	23	51.9	51.9	51.9	63.123	0	221.91	1748900000	27	97	AT3G54610.1	AT3G54610.1	1207
22.7872	22.6934	22.9955	23.1269	NaN	NaN				-1	8	8	8	33.1	33.1	33.1	29.334	0	28.833	57443000	15	15	AT3G55000.1;AT3G55005.1	AT3G55000.1	1214
23.7122	24.0627	23.7129	24.1511	NaN	24.1406				-1	8	8	8	30.3	30.3	30.3	41.504	0	36.711	184420000	21	20	AT3G55010.2;AT3G55010.1	AT3G55010.2;AT3G55010.1	1215
26.8418	26.654	26.9114	26.5943	26.4066	26.6285				-1	45	45	45	46	46	46	134.97	0	216.95	5520400000	52	184	AT3G55220.1;AT3G55200.3;AT3G55200.2;AT3G55200.1	AT3G55220.1;AT3G55200.3;AT3G55200.2;AT3G55200.1	1217
25.2481	25.4062	25.3794	25.5054	24.9453	25.6881				-1	33	33	21	39.9	39.9	26.8	115.16	0	172.5	1681200000	48	119	AT3G55410.2;AT3G55410.1	AT3G55410.2;AT3G55410.1	1219
25.9513	26.0383	25.4657	26.1583	25.2551	26.6355				-1	10	10	10	65.4	65.4	65.4	27.169	0	76.886	1411200000	14	46	AT3G55440.1	AT3G55440.1	1220
NaN	NaN	23.2006	23.4018	NaN	23.2146				-1	3	3	3	15.2	15.2	15.2	32.603	0	27.313	64035000	9	8	AT3G55560.1	AT3G55560.1	1223
24.6857	24.2917	24.2813	24.1762	NaN	NaN				-1	4	4	4	29.4	29.4	29.4	26.482	0	33.809	195180000	9	13	AT3G55620.1	AT3G55620.1	1226
22.9734	22.9833	22.9434	NaN	NaN	NaN				-1	2	2	2	13.6	13.6	13.6	21.663	0	5.6374	50630000	14	8	AT3G55770.5;AT3G55770.3;AT3G55770.2;AT3G55770.1;AT3G55770.6;AT3G55770.4;AT3G55770.7	AT3G55770.5;AT3G55770.3;AT3G55770.2;AT3G55770.1;AT3G55770.6;AT3G55770.4;AT3G55770.7	1227
23.4074	24.4722	23.5876	23.6474	NaN	24.6597				-1	7	6	6	40.3	36.4	36.4	18.92	0	17.097	204180000	11	16	AT3G56070.2;AT3G56070.1	AT3G56070.2;AT3G56070.1	1228
31.313	31.3169	31.0299	31.1571	31.1904	30.8882				-1	17	17	17	69	69	69	29.576	0	323.31	71051000000	8	285	AT3G56130.1;AT3G56130.4;AT3G56130.2;AT3G56130.5;AT3G56130.3	AT3G56130.1;AT3G56130.4;AT3G56130.2;AT3G56130.5;AT3G56130.3	1230
24.441	24.1948	24.4841	24.6873	22.5413	23.24				-1	20	20	20	27.9	27.9	27.9	102.95	0	111.66	503420000	48	59	AT3G56150.1;AT3G56150.2;AT3G22860.1	AT3G56150.1;AT3G56150.2	1231
24.206	24.1638	23.8125	NaN	NaN	23.7379				-1	4	2	2	36.9	18.5	18.5	14.628	0	8.0106	115690000	5	10	AT3G56340.1	AT3G56340.1	1233
24.884	24.9076	24.8656	25.0208	22.0486	25.3755				-1	23	23	23	45.1	45.1	45.1	63.026	0	126.2	821250000	32	88	AT3G57150.1	AT3G57150.1	1239
23.9788	24.2295	23.9372	24.4284	NaN	23.8927				-1	13	13	13	35.4	35.4	35.4	51.749	0	52.021	220520000	28	27	AT3G57290.1	AT3G57290.1	1241
26.3337	26.2851	26.1282	26.3218	25.9733	25.8757				-1	11	11	11	50.4	50.4	50.4	28.106	0	60.741	1298000000	12	44	AT3G57360.1;AT3G02370.1;AT3G02370.4;AT3G02370.3;AT3G02370.2	AT3G57360.1	1242
25.6651	25.1343	24.7635	25.576	NaN	23.828				-1	6	6	6	24.8	24.8	24.8	36.595	0	41.811	382790000	19	26	AT3G57560.1	AT3G57560.1	1244
23.6143	23.9781	23.4881	24.0394	NaN	24.4701				-1	8	8	8	20.2	20.2	20.2	52.964	0	37.542	168680000	29	17	AT3G57610.1	AT3G57610.1	1245
26.2291	26.1044	26.2641	26.8755	26.5712	27.1				-1	37	19	19	60.6	38.6	38.6	66.025	0	242.22	3296300000	30	114	AT3G58510.3;AT3G58510.2;AT3G58510.1	AT3G58510.3;AT3G58510.2;AT3G58510.1	1250
24.5669	24.4389	24.7789	24.5145	NaN	24.8167				-1	32	12	12	48.5	23.7	23.7	69.241	0	103.01	383910000	35	34	AT3G58570.1	AT3G58570.1	1251
25.5374	25.9172	25.8812	26.0923	24.3969	25.6968				-1	13	13	13	28.1	28.1	28.1	63.812	0	90.914	1030400000	27	44	AT3G58610.3;AT3G58610.2;AT3G58610.1	AT3G58610.3;AT3G58610.2;AT3G58610.1	1252
NaN	22.1243	21.9473	21.8346	NaN	NaN				-1	4	4	4	6.9	6.9	6.9	117.64	0	13.011	22305000	45	9	AT3G59020.1;AT3G59020.2	AT3G59020.1;AT3G59020.2	1254
24.0486	24.3687	24.4992	24.2351	NaN	24.3424				-1	3	3	1	24.2	24.2	7.7	9.9132	0	6.1538	221870000	6	13	AT3G59810.3;AT3G59810.2;AT3G59810.1	AT3G59810.3;AT3G59810.2;AT3G59810.1	1258
24.1446	24.3012	24.0706	24.4042	NaN	24.2255				-1	14	14	8	47.5	47.5	30.2	49.538	0	59.98	350970000	23	38	AT3G59920.1	AT3G59920.1	1260
27.2407	27.2336	27.3937	27.5283	27.2781	27.6873				-1	83	83	0	53.6	53.6	0	187.72	0	323.31	15277000000	91	443	AT3G60240.3	AT3G60240.3	1264
24.9162	24.6511	24.623	25.0233	23.4052	25.7636				-1	18	18	12	37.3	37.3	29.7	79.838	0	108.94	677720000	33	63	AT3G60750.2;AT3G60750.1	AT3G60750.2;AT3G60750.1	1269
22.717	22.853	22.871	22.8138	NaN	23.5126				-1	6	6	6	37.2	37.2	37.2	24.644	0	30.735	105730000	13	15	AT3G60820.3;AT3G60820.2;AT3G60820.1	AT3G60820.3;AT3G60820.2;AT3G60820.1	1271
25.2364	25.0824	25.183	25.3568	24.6165	25.7859				-1	14	14	14	53.4	53.4	53.4	39.904	0	93.187	901420000	19	61	AT3G60830.1	AT3G60830.1	1272
26.0351	26.3233	26.4837	26.6771	NaN	NaN				-1	5	5	3	2.7	2.7	1.4	199.63	0	7.0682	494770000	87	14	AT3G60860.1	AT3G60860.1	1273
24.7187	24.7428	24.9525	25.2216	25.2387	25.1595				-1	16	16	8	46	46	29.7	56.774	0	92.021	626080000	26	59	AT3G61240.2;AT3G61240.1	AT3G61240.2;AT3G61240.1	1276
24.6637	24.298	24.3752	24.6219	23.504	23.9619				-1	15	15	3	42	42	4.4	53.246	0	82.987	428080000	25	50	AT3G61650.1	AT3G61650.1	1279
NaN	22.8887	NaN	22.5715	NaN	23.2101				-1	5	5	5	5.4	5.4	5.4	139.22	0	18.077	49547000	56	9	AT3G61690.2;AT3G61690.3;AT3G61690.1	AT3G61690.2;AT3G61690.3;AT3G61690.1	1280
NaN	24.5161	24.1375	24.7932	NaN	24.5548				-1	5	5	5	18.1	18.1	18.1	28.079	0	12.051	164050000	18	18	AT3G62030.3;AT3G62030.1;AT3G62030.2	AT3G62030.3;AT3G62030.1;AT3G62030.2	1283
23.5253	23.7689	23.2057	23.6128	NaN	23.5068				-1	9	9	9	22.4	22.4	22.4	59.173	0	40.999	146840000	33	16	AT3G62120.3;AT3G62120.2;AT3G62120.1	AT3G62120.3;AT3G62120.2;AT3G62120.1	1285
23.565	23.8051	23.5124	23.4641	NaN	23.8222				-1	8	8	8	15.2	15.2	15.2	74.186	0	40.489	196020000	32	33	AT3G62200.1	AT3G62200.1	1286
22.3788	22.6248	22.6357	22.8179	NaN	NaN				-1	7	7	7	9.9	9.9	9.9	90.223	0	20.827	70114000	44	15	AT3G62240.1	AT3G62240.1	1287
24.9141	24.8661	24.8433	24.2617	23.4917	24.5698				-1	12	12	12	22.3	22.3	22.3	82.693	0	49.568	355200000	39	35	AT3G62310.1;AT3G62310.3;AT3G62310.2;AT2G47250.1	AT3G62310.1;AT3G62310.3;AT3G62310.2;AT2G47250.1	1288
25.7134	25.7658	25.6464	25.7319	25.327	25.6578				-1	12	12	12	52.9	52.9	52.9	24.503	0	64.817	1252500000	14	63	AT3G62530.1	AT3G62530.1	1291
26.4301	26.5933	26.4813	26.1583	26.6273	26.1843				-1	11	11	2	40.2	40.2	8.2	29.034	0	38.585	1328800000	11	67	AT3G62870.1	AT3G62870.1	1293
23.8803	24.0413	24.0388	24.385	22.2537	24.4124				-1	19	19	19	23.5	23.5	23.5	119.87	0	106.93	441360000	47	49	AT3G63460.1;AT3G63460.3;AT3G63460.2;AT1G18830.3;AT1G18830.2;AT1G18830.1	AT3G63460.1;AT3G63460.3;AT3G63460.2	1297
22.6597	22.7416	NaN	22.7322	NaN	NaN				-1	4	4	4	14.5	14.5	14.5	37.632	0	14.877	41466000	17	10	AT3G63490.1;AT3G63490.2	AT3G63490.1;AT3G63490.2	1298
26.9774	26.5359	26.8283	26.6253	26.304	25.691				-1	10	10	1	61.6	61.6	7.9	17.085	0	23.972	1786700000	8	50	AT4G00100.1	AT4G00100.1	1299
NaN	23.2308	24.028	23.4942	NaN	NaN				-1	11	7	7	28.1	21.2	21.2	57.686	0	20.807	94247000	29	13	AT4G00660.2;AT4G00660.1	AT4G00660.2;AT4G00660.1	1300
23.9728	23.845	24.008	24.2275	23.7686	24.0188				-1	11	11	11	26.5	26.5	26.5	55.136	0	30.908	162710000	25	26	AT4G00830.6;AT4G00830.4;AT4G00830.2;AT4G00830.1;AT4G00830.5;AT4G00830.3	AT4G00830.6;AT4G00830.4;AT4G00830.2;AT4G00830.1;AT4G00830.5;AT4G00830.3	1301
24.8419	24.8175	24.9671	25.0848	22.7648	24.9718				-1	37	37	37	51.5	51.5	51.5	108.49	0	263.6	1269000000	52	130	AT4G01290.2;AT4G01290.1	AT4G01290.2;AT4G01290.1	1304
25.7065	25.7195	25.3124	25.3135	24.2312	25.7919				-1	18	11	6	67.4	47.3	26	43.255	0	84.622	698130000	18	42	AT4G01850.2;AT4G01850.1	AT4G01850.2;AT4G01850.1	1307
22.4109	22.8649	22.8337	22.6492	23.0301	22.7102				-1	4	4	4	24	24	24	21.275	0	8.017	50389000	14	14	AT4G01900.1	AT4G01900.1	1309
24.8004	25.033	24.5432	24.7904	NaN	25.3515				-1	7	7	2	50.3	50.3	18.1	22.03	0	32.195	421070000	13	27	AT4G02080.1	AT4G02080.1	1312
24.5885	24.8711	24.4045	24.7935	24.29	25.6058				-1	10	10	10	38.3	38.3	38.3	25.341	0	65.08	503250000	8	43	AT4G02450.2;AT4G02450.1	AT4G02450.2;AT4G02450.1	1317
24.7924	25.109	24.7463	24.5601	NaN	25.0886				-1	4	4	2	37.9	37.9	11.2	12.75	0	32.31	278160000	4	16	AT4G02840.1;AT4G02840.2	AT4G02840.1;AT4G02840.2	1320
25.7134	25.8284	25.5891	25.6428	25.2599	26.2174				-1	18	17	17	51.3	48	48	49.409	0	115.95	1465400000	30	71	AT4G02930.1	AT4G02930.1	1321
24.6523	24.6556	24.864	25.0187	25.2993	25.3038				-1	15	15	15	31.4	31.4	31.4	56.823	0	56.229	644310000	25	59	AT4G03250.1	AT4G03250.1	1323
22.938	22.651	NaN	22.6191	NaN	23.1415				-1	6	6	6	20.1	20.1	20.1	53.115	0	20.99	80594000	25	17	AT4G04950.1;AT4G32580.1	AT4G04950.1	1328
23.8478	23.9906	23.9258	24.643	24.2873	24.5103				-1	6	6	6	18.9	18.9	18.9	53.062	0	39.639	233550000	20	18	AT4G05150.1	AT4G05150.1	1330
NaN	22.4999	22.4484	22.2058	NaN	22.4355				-1	10	10	10	9.2	9.2	9.2	121.3	0	28.911	62969000	49	19	AT4G05420.1;AT4G05420.2;AT4G21100.1	AT4G05420.1;AT4G05420.2;AT4G21100.1	1331
23.5565	23.4896	23.7406	23.7075	24.2227	23.9515				-1	8	8	8	24.6	24.6	24.6	51.257	0	59.699	181910000	15	23	AT5G17900.1;AT4G08580.2;AT4G08580.1	AT5G17900.1;AT4G08580.2;AT4G08580.1	1336
NaN	22.9385	23.414	23.0243	NaN	NaN				-1	2	2	2	9.6	9.6	9.6	33.599	0	14.659	44954000	14	6	AT4G08950.1	AT4G08950.1	1337
23.6504	23.7886	23.3636	23.4882	NaN	23.8965				-1	12	7	3	40.4	31.1	16.1	29.931	0	51.097	121900000	18	15	AT4G09000.1;AT4G09000.2	AT4G09000.1;AT4G09000.2	1338
25.4552	25.7256	25.2299	25.949	24.9296	26.0215				-1	8	8	8	63.8	63.8	63.8	16.5	0	72.971	1112600000	9	55	AT4G09320.1	AT4G09320.1	1340
NaN	22.7752	22.5976	22.3764	NaN	23.1091				-1	15	15	15	16.6	16.6	16.6	135.48	0	36.211	99633000	58	18	AT4G10320.1	AT4G10320.1	1344
23.7984	23.9708	NaN	23.8822	23.8995	NaN				-1	5	5	5	26.9	26.9	26.9	25.734	0	12.741	118920000	14	14	AT4G11010.1;AT4G23900.1;AT4G23895.3	AT4G11010.1;AT4G23900.1;AT4G23895.3	1349
23.7962	23.4804	23.7303	23.4625	NaN	22.158				-1	15	15	4	21.5	21.5	6.4	99.371	0	49.092	158810000	42	37	AT4G11380.1;AT4G11380.2	AT4G11380.1;AT4G11380.2	1351
23.6258	23.7923	24.005	24.0138	NaN	23.4154				-1	15	15	15	16.9	16.9	16.9	114.3	0	41.123	277790000	51	33	AT4G11420.1	AT4G11420.1	1352
24.1672	24.4291	24.3278	23.9697	24.1549	24.3946				-1	4	4	4	17.7	17.7	17.7	25.584	0	10.172	216040000	12	17	AT4G11600.1	AT4G11600.1	1353
24.9314	25.2028	24.6609	25.1337	NaN	25.666				-1	5	5	5	47.9	47.9	47.9	14.691	0	46.504	369160000	6	21	AT4G13850.3;AT4G13850.2;AT4G13850.1;AT4G13850.4	AT4G13850.3;AT4G13850.2;AT4G13850.1;AT4G13850.4	1358
23.3931	23.5807	23.175	23.6302	NaN	NaN				-1	7	7	7	22.7	22.7	22.7	51.717	0	29.068	94942000	21	18	AT4G13930.1;AT4G13890.2;AT4G13890.1	AT4G13930.1	1359
25.0448	25.2187	24.8579	25.0744	22.8503	24.8348				-1	19	19	19	42.7	42.7	42.7	53.378	0	78.365	897420000	25	72	AT4G13940.1;AT4G13940.3;AT4G13940.2;AT4G13940.4;AT3G23810.1	AT4G13940.1;AT4G13940.3;AT4G13940.2;AT4G13940.4;AT3G23810.1	1360
23.0948	NaN	NaN	23.5573	NaN	23.5641				-1	8	8	6	15.3	15.3	12.3	85.277	0	29.39	105160000	30	14	AT4G14160.2;AT4G14160.1;AT4G14160.3;AT2G21630.1;AT3G23660.1;AT3G23660.2	AT4G14160.2;AT4G14160.1;AT4G14160.3	1362
22.8555	22.819	23.2277	23.3728	NaN	22.889				-1	6	6	2	38.2	38.2	13.1	21.984	0	18.979	86830000	12	17	AT4G14800.1;AT4G14800.2	AT4G14800.1;AT4G14800.2	1365
23.2531	24.0889	23.0749	23.9183	NaN	23.9353				-1	9	9	9	42.5	42.5	42.5	33.805	0	39.561	143770000	16	23	AT4G14880.5;AT4G14880.4;AT4G14880.3;AT4G14880.2;AT4G14880.1;AT3G22460.2;AT3G22460.1	AT4G14880.5;AT4G14880.4;AT4G14880.3;AT4G14880.2;AT4G14880.1	1367
23.0237	23.5046	22.9066	23.2371	NaN	23.6267				-1	3	3	3	15.2	15.2	15.2	33.707	0	14.782	89363000	14	7	AT4G14930.2;AT4G14930.1	AT4G14930.2;AT4G14930.1	1368
28.6975	28.726	28.7393	28.9068	28.4805	28.1992				-1	23	23	1	65.3	65.3	3.1	49.537	0	323.31	11207000000	21	143	AT4G14960.2;AT4G14960.1	AT4G14960.2;AT4G14960.1	1369
23.3903	23.3515	NaN	23.7765	NaN	23.302				-1	7	7	7	24.9	24.9	24.9	37.148	0	27.412	129580000	21	15	AT4G15640.2;AT4G15640.1	AT4G15640.2;AT4G15640.1	1374
22.8878	22.9147	22.4677	22.5797	NaN	NaN				-1	12	12	12	15	15	15	114.26	0	37.068	95359000	48	18	AT4G16130.1;AT3G42850.1;AT3G42850.2	AT4G16130.1	1377
24.3858	24.5462	24.5842	24.8906	24.5211	24.6591				-1	17	17	12	43	43	37.2	58.906	0	115.36	665560000	25	64	AT4G16143.2;AT4G16143.1	AT4G16143.2;AT4G16143.1	1378
24.0982	24.1575	23.7279	24.6331	NaN	24.8204				-1	18	7	7	40.9	16.9	16.9	60.144	0	65.42	308100000	28	34	AT4G16155.1	AT4G16155.1	1380
25.7674	25.439	25.8527	25.9261	25.7798	26.3961				-1	16	16	16	24.4	24.4	24.4	81.705	0	108.62	1474300000	36	61	AT4G16280.2;AT4G16280.4;AT4G16280.3;AT4G16280.1	AT4G16280.2;AT4G16280.4;AT4G16280.3;AT4G16280.1	1383
25.5961	25.3624	25.6575	25.8837	25.1911	25.7068				-1	18	18	18	39.1	39.1	39.1	55.723	0	137.98	946770000	23	60	AT4G16420.2;AT4G16420.3;AT4G16420.1	AT4G16420.2;AT4G16420.3;AT4G16420.1	1386
27.1532	26.8535	26.8561	26.6562	26.1082	26.8774				-1	9	9	9	41.7	41.7	41.7	24.239	0	56.876	2367700000	9	56	AT4G17390.1;AT4G16720.1	AT4G17390.1;AT4G16720.1	1387
22.2094	22.4486	22.4112	22.8527	22.358	23.1598				-1	11	11	11	8.2	8.2	8.2	214.2	0	42.626	71846000	88	25	AT4G17330.3;AT4G17330.2;AT4G17330.1	AT4G17330.3;AT4G17330.2;AT4G17330.1	1393
23.067	23.2204	22.8434	22.7788	23.1535	23.2046				-1	5	5	3	20.6	20.6	14.2	38.905	0	18.094	81566000	18	14	AT4G17520.1	AT4G17520.1	1394
24.5395	24.4622	24.6208	24.6577	24.206	24.7489				-1	7	7	6	49.5	49.5	44.1	22.318	0	25.182	171320000	16	21	AT4G17530.1;AT5G47200.1;AT1G02130.1	AT4G17530.1;AT5G47200.1	1395
26.1168	25.6362	25.9382	26.3467	25.7354	25.8563				-1	7	7	7	25.1	25.1	25.1	46.276	0	43.002	220280000	14	23	AT4G17950.1;AT4G39925.1	AT4G17950.1	1398
27.3088	27.1966	27.3753	27.046	26.2566	27.7141				-1	11	11	11	66.8	66.8	66.8	26.519	0	123.52	2576200000	13	60	AT4G18040.1;AT1G29590.1;AT1G29550.1	AT4G18040.1	1399
26.4757	26.5265	26.4918	26.4085	25.9307	26.3053				-1	9	9	3	60.9	60.9	30.8	15.503	0	66.056	1394300000	6	40	AT4G18100.1	AT4G18100.1	1400
27.0288	26.8393	26.9813	26.8207	26.4173	27.0338				-1	28	28	28	56.5	56.5	56.5	68.389	0	323.31	5275700000	29	151	AT4G19210.1;AT3G13640.1	AT4G19210.1	1406
26.7965	26.9669	27.1519	26.8492	26.6721	26.6057				-1	21	21	20	60.9	60.9	57.8	51.63	0	211.8	3073600000	25	103	AT4G20360.2;AT4G20360.1	AT4G20360.2;AT4G20360.1	1409
23.0914	22.8659	22.866	23.174	NaN	23.8774				-1	18	18	18	14.7	14.7	14.7	152.37	0	70.43	266680000	69	38	AT4G20850.1	AT4G20850.1	1411
24.1735	24.1158	24.1226	23.9791	NaN	24.5558				-1	24	3	3	62.2	8.1	8.1	49.657	0	30.638	148980000	20	12	AT4G20890.1	AT4G20890.1	1412
24.2852	24.0537	24.1724	24.0326	23.4447	24.4868				-1	12	12	12	32.4	32.4	32.4	66.833	0	84.076	296540000	19	31	AT4G21660.1;AT4G21660.2;AT4G21660.3;AT1G11520.1	AT4G21660.1;AT4G21660.2;AT4G21660.3	1414
NaN	22.8266	22.4119	23.7797	NaN	NaN				-1	8	8	8	29	29	29	46.621	0	52.436	70171000	18	16	AT4G22670.1	AT4G22670.1	1418
24.4536	24.8714	24.6719	23.0304	NaN	23.3664				-1	10	10	10	27.2	27.2	27.2	59.425	0	47.106	250840000	28	27	AT4G22710.1;AT4G22690.1	AT4G22710.1;AT4G22690.1	1419
23.093	23.6729	23.2226	23.5669	22.54	24.2511				-1	17	15	15	24.9	22.4	22.4	94.148	0	56.164	217170000	42	34	AT4G24190.2;AT4G24190.1	AT4G24190.2;AT4G24190.1	1427
28.8461	28.9284	28.7495	28.9273	28.795	29.2231				-1	50	50	20	59.1	59.1	27.9	76.507	0	323.31	25277000000	38	289	AT4G24280.1	AT4G24280.1	1428
22.0608	21.851	NaN	NaN	24.7441	NaN				-1	7	7	7	27.9	27.9	27.9	38.87	0	21.141	64806000	15	13	AT4G24710.4;AT4G24710.2;AT4G24710.1;AT4G24710.3	AT4G24710.4;AT4G24710.2;AT4G24710.1;AT4G24710.3	1432
24.4627	24.479	24.6291	NaN	NaN	NaN				-1	7	7	7	16	16	16	77.435	0	82.021	140300000	33	13	AT4G24800.4;AT4G24800.3;AT4G24800.2;AT4G24800.1	AT4G24800.4;AT4G24800.3;AT4G24800.2;AT4G24800.1	1434
23.9516	24.1714	23.8276	23.5154	NaN	24.1242				-1	11	11	11	36.4	36.4	36.4	44.282	0	57.687	248040000	20	34	AT4G24820.2;AT4G24820.1	AT4G24820.2;AT4G24820.1	1435
22.9839	22.9851	NaN	23.4889	NaN	23.1579				-1	7	7	7	20.9	20.9	20.9	53.845	0	32.982	112010000	30	19	AT4G24830.1;AT4G24830.2	AT4G24830.1;AT4G24830.2	1436
23.5572	23.5247	23.6663	23.3519	NaN	23.7047				-1	6	6	6	36.3	36.3	36.3	23.791	0	26.294	139920000	9	15	AT4G25100.5;AT4G25100.3;AT4G25100.2;AT4G25100.1;AT4G25100.4	AT4G25100.5;AT4G25100.3;AT4G25100.2;AT4G25100.1;AT4G25100.4	1437
23.0594	23.144	23.1388	23.4012	NaN	23.8356				-1	6	6	6	23.9	23.9	23.9	40.274	0	26.467	109930000	18	15	AT4G25210.1	AT4G25210.1	1439
23.3221	23.4406	NaN	23.4654	NaN	NaN				-1	6	6	6	9.8	9.8	9.8	76.252	0	10.538	91100000	33	9	AT4G25530.1;AT4G00730.2;AT5G52170.3;AT5G52170.1;AT5G52170.2;AT4G00730.1	AT4G25530.1	1440
22.6426	22.3843	NaN	22.6465	NaN	NaN				-1	4	4	4	24.5	24.5	24.5	22.829	0	8.6745	52837000	11	13	AT4G25550.1	AT4G25550.1	1441
25.1806	24.6374	25.0178	25.2584	24.1873	25.5038				-1	11	11	1	42.8	42.8	3.4	33.653	0	46.884	440220000	18	30	AT4G25630.1;AT5G52470.2;AT5G52490.1	AT4G25630.1;AT5G52470.2	1442
24.2871	23.8314	24.33	23.9119	25.3117	23.3067				-1	7	7	7	30.9	30.9	30.9	33.071	0	31.257	216850000	17	24	AT4G25840.1;AT5G57440.1	AT4G25840.1	1444
22.9706	22.8664	22.9215	NaN	23.384	23.8555				-1	11	11	9	14.9	14.9	12.2	95.508	0	22.831	97747000	42	20	AT4G25880.2;AT4G25880.3;AT4G25880.5;AT4G25880.1;AT4G25880.4	AT4G25880.2;AT4G25880.3;AT4G25880.5;AT4G25880.1;AT4G25880.4	1445
24.2228	24.6203	24.3997	24.4622	NaN	23.7393				-1	7	7	6	21.2	21.2	18.9	41.607	0	13.39	164910000	16	18	AT4G26110.2;AT4G26110.1;AT5G56950.1	AT4G26110.2;AT4G26110.1	1446
23.464	23.5595	23.1686	23.5393	23.1574	23.885				-1	19	7	5	40.1	16.4	14.3	53.666	0	26.012	176480000	26	28	AT4G26270.1;AT5G47810.1	AT4G26270.1	1447
25.7039	25.6904	25.4595	25.702	24.9564	26.1349				-1	10	10	10	37	37	37	36.116	0	65.618	1093400000	21	50	AT4G26780.1	AT4G26780.1	1449
26.6716	26.6455	26.5105	26.2311	26.1764	26.7347				-1	11	11	5	51.5	51.5	23.1	15.505	0	65.073	1462100000	6	47	AT4G27090.1	AT4G27090.1	1458
24.4642	24.2904	24.1347	24.3983	23.9882	24.3572				-1	5	5	5	30.4	30.4	30.4	27.622	0	58.163	235620000	13	18	AT4G27450.1	AT4G27450.1	1460
24.719	24.6967	24.2814	24.6686	23.4033	24.8659				-1	12	12	12	42.1	42.1	42.1	45.02	0	81.46	560670000	25	47	AT4G27585.1;AT5G54100.1	AT4G27585.1	1462
24.2814	24.1435	24.3779	24.7718	24.5337	24.527				-1	5	5	5	36	36	36	19.081	0	51.237	187460000	9	18	AT4G28820.2;AT4G28820.1;AT4G28820.4;AT4G28820.3;AT4G28820.5;AT4G28820.6	AT4G28820.2;AT4G28820.1;AT4G28820.4;AT4G28820.3;AT4G28820.5;AT4G28820.6	1468
24.9023	25.1343	24.8354	24.9783	24.54	25.4462				-1	6	5	5	35	35	35	15.91	0	20.589	369060000	7	23	AT4G29410.2;AT4G29410.1	AT4G29410.2;AT4G29410.1	1475
22.2902	NaN	NaN	23.0944	NaN	23.8422				-1	18	14	14	18.2	14.6	14.6	133.24	0	40.217	127740000	51	24	AT4G29790.1	AT4G29790.1	1478
23.9059	23.8422	23.8233	23.7289	NaN	24.0648				-1	6	6	5	14.8	14.8	12.7	57.776	0	9.6313	121890000	23	18	AT4G29840.1	AT4G29840.1	1480
22.8819	23.1889	23.0423	23.7	NaN	24.341				-1	14	14	2	19.1	19.1	2.7	104.4	0	44.661	190710000	50	36	AT4G30190.1;AT4G30190.2	AT4G30190.1;AT4G30190.2	1482
29.7637	29.6882	29.7034	29.7064	30.1529	29.6013				-1	34	34	34	48.8	48.8	48.8	72.496	0	323.31	27243000000	20	263	AT4G31200.3;AT4G31200.2;AT4G31200.1	AT4G31200.3;AT4G31200.2;AT4G31200.1	1489
23.6214	22.9028	23.1807	23.3155	NaN	23.8763				-1	4	4	4	20.2	20.2	20.2	25.151	0	20.15	92058000	13	13	AT4G31300.1;AT4G31300.3;AT4G31300.2	AT4G31300.1;AT4G31300.3;AT4G31300.2	1490
23.1188	23.1545	NaN	23.1156	23.7788	23.782				-1	9	9	8	22.4	22.4	20.6	41.801	0	22.868	117620000	23	20	AT4G31440.1	AT4G31440.1	1491
23.6084	23.9863	23.6935	23.996	NaN	23.6969				-1	14	14	14	18.4	18.4	18.4	106.08	0	48.613	301870000	42	37	AT4G31490.3;AT4G31490.2;AT4G31490.1;AT4G31480.9;AT4G31480.8;AT4G31480.7;AT4G31480.5;AT4G31480.4;AT4G31480.2;AT4G31480.1;AT4G31480.6;AT4G31480.3	AT4G31490.3;AT4G31490.2;AT4G31490.1;AT4G31480.9;AT4G31480.8;AT4G31480.7;AT4G31480.5;AT4G31480.4;AT4G31480.2;AT4G31480.1;AT4G31480.6;AT4G31480.3	1492
25.2919	25.3401	24.9358	25.1964	25.2252	25.5234				-1	10	3	3	40.8	14	14	28.367	0	13.618	495880000	10	17	AT4G31700.1;AT4G31700.2	AT4G31700.1;AT4G31700.2	1494
NaN	23.0904	23.604	22.7761	23.8731	NaN				-1	3	3	3	21.6	21.6	21.6	14.913	0	7.2621	66290000	7	9	AT4G31720.3;AT4G31720.2;AT4G31720.1	AT4G31720.3;AT4G31720.2;AT4G31720.1	1495
23.926	23.4889	23.9995	24.2067	NaN	NaN				-1	6	6	6	36.5	36.5	36.5	30.79	0	38.797	164100000	9	11	AT4G31790.2;AT4G31790.1	AT4G31790.2;AT4G31790.1	1497
23.0638	23.2104	NaN	23.3732	NaN	23.4634				-1	9	9	9	17.6	17.6	17.6	57.982	0	24.481	136450000	27	20	AT4G32520.2;AT4G32520.1	AT4G32520.2;AT4G32520.1	1502
24.8317	24.7432	24.9104	24.8925	24.7261	25.0944				-1	23	23	23	40.2	40.2	40.2	102.23	0	144.97	760820000	36	64	AT4G32551.1;AT4G32551.2	AT4G32551.1;AT4G32551.2	1503
25.4888	25.2874	25.5366	25.2989	24.038	25.6417				-1	18	13	10	42.4	33.1	29.7	50.787	0	99.684	1016400000	24	53	AT4G32840.1	AT4G32840.1	1507
24.1391	24.47	24.1143	24.9167	24.2509	24.7517				-1	10	10	8	16.8	16.8	13.5	66.212	0	35.95	374680000	23	38	AT4G33070.1;AT5G01330.1;AT5G01320.1	AT4G33070.1	1509
23.1131	NaN	23.0566	23.0665	NaN	NaN				-1	3	3	3	14.6	14.6	14.6	25.728	0	30.644	56775000	11	5	AT4G33250.1	AT4G33250.1	1510
30.3158	30.2013	30.0762	30.2908	29.9615	30.5326				-1	42	42	41	72.2	72.2	71	64.012	0	323.31	58116000000	29	365	AT4G34030.1	AT4G34030.1	1514
24.7718	24.6793	25.0273	24.7865	23.7886	24.4907				-1	19	16	16	37.8	31.5	31.5	68.672	0	83.263	646570000	29	61	AT4G34110.1;AT2G15500.1	AT4G34110.1	1515
23.9445	24.4022	23.7324	24.3141	23.4111	24.192				-1	13	13	13	33	33	33	63.324	0	74.168	375460000	29	41	AT4G34200.1;AT3G19480.1;AT1G17745.1;AT1G17745.2	AT4G34200.1	1516
24.5037	24.4188	24.5701	24.7155	NaN	24.7822				-1	22	22	22	32.5	32.5	32.5	98.49	0	93.789	437140000	54	57	AT4G34450.1	AT4G34450.1	1519
26.68	26.6453	26.5707	26.5014	26.2338	26.7768				-1	13	13	8	48.1	48.1	33.2	29.803	0	108.18	1316800000	16	57	AT4G34670.1	AT4G34670.1	1520
24.8405	25.3639	24.7115	24.769	NaN	25.3834				-1	8	8	6	55.2	55.2	45.9	18.378	0	33.045	502420000	10	30	AT4G34870.1	AT4G34870.1	1521
25.4499	25.2624	25.3237	24.8278	24.6181	24.92				-1	12	12	8	43.3	43.3	28.6	39.626	0	108.31	797380000	15	52	AT4G35260.1;AT4G35650.1;AT1G32480.1	AT4G35260.1	1523
23.7906	23.6965	23.7098	NaN	NaN	24.1077				-1	7	7	4	19.1	19.1	11.9	47.359	0	26.133	150370000	21	13	AT4G35630.1	AT4G35630.1	1524
23.5506	23.0502	23.5404	21.9068	NaN	22.9281				-1	16	6	6	21.8	8.2	8.2	98.151	0	61.663	102490000	42	15	AT4G35830.1;AT4G35830.2	AT4G35830.1;AT4G35830.2	1526
23.3309	23.2032	23.8883	23.6588	22.7005	22.9756				-1	90	33	33	28.2	12.3	12.3	430	0	152.98	379330000	221	75	AT4G36080.2;AT4G36080.3;AT4G36080.1	AT4G36080.2;AT4G36080.3;AT4G36080.1	1530
24.3574	NaN	NaN	24.0548	NaN	24.3318				-1	10	2	2	39.1	11.6	11.6	27.948	0	11.718	100810000	13	9	AT4G36130.1	AT4G36130.1	1531
24.8617	24.9322	25.1359	25.0422	23.8815	24.8477				-1	18	18	18	37.4	37.4	37.4	73.404	0	96.515	839070000	34	65	AT4G37870.1;AT5G65690.3;AT5G65690.4;AT5G65690.1;AT5G65690.2	AT4G37870.1	1534
28.0488	27.9615	28.064	28.2596	28.2166	28.5649				-1	49	47	39	66.1	66.1	60	73.074	0	323.31	13795000000	40	266	AT4G37910.2;AT4G37910.1	AT4G37910.2;AT4G37910.1	1535
23.8755	23.4167	24.0002	23.7425	NaN	24.2955				-1	10	10	10	32.1	32.1	32.1	56.022	0	56.374	197210000	28	23	AT4G38130.1;AT4G38130.2	AT4G38130.1;AT4G38130.2	1536
24.0243	24.0222	24.0343	23.9469	NaN	23.355				-1	7	7	7	21.2	21.2	21.2	40.757	0	33.207	173560000	14	21	AT4G38630.1	AT4G38630.1	1539
25.3839	25.8974	NaN	25.8288	NaN	NaN				-1	2	2	1	15.3	15.3	10.8	19.153	0	20.203	202990000	10	7	AT4G38680.1	AT4G38680.1	1540
26.0576	25.8534	26.0909	26.1987	25.6812	26.3082				-1	20	12	12	40.3	32.7	32.7	48.031	0	117.25	1003100000	24	49	AT4G39960.2;AT4G39960.1	AT4G39960.2;AT4G39960.1	1546
23.7402	24.0139	24.2391	23.83	NaN	23.8319				-1	12	12	8	26.1	26.1	19.4	57.978	0	27.635	186330000	30	29	AT4G39980.1	AT4G39980.1	1547
25.4548	24.7194	25.0885	23.9063	NaN	25.0038				-1	4	4	4	19.9	19.9	19.9	15.406	0	8.5306	323160000	4	13	AT4G40030.1;AT4G40040.2;AT5G10980.1;AT4G40040.3;AT4G40030.2;AT4G40040.1;AT4G40030.4;AT4G40030.3;AT3G27360.1;AT5G10390.1;AT5G10400.1;AT5G65360.1;AT1G09200.1;AT1G75600.1;AT1G13370.1;AT5G65350.1;AT1G19890.1	AT4G40030.1;AT4G40040.2;AT5G10980.1;AT4G40040.3;AT4G40030.2;AT4G40040.1;AT4G40030.4;AT4G40030.3;AT3G27360.1;AT5G10390.1;AT5G10400.1;AT5G65360.1;AT1G09200.1;AT1G75600.1;AT1G13370.1;AT5G65350.1	1548
28.7766	28.6578	28.6256	28.8365	28.7223	28.7358				-1	29	29	29	53.6	53.6	53.6	38.272	0	323.31	11052000000	13	169	AT5G01380.1	AT5G01380.1	1549
23.9104	23.7945	23.9993	24.2567	NaN	24.1327				-1	5	5	5	19.1	19.1	19.1	33.216	0	19.65	250220000	14	18	AT5G01410.2;AT5G01410.1;AT2G38210.1;AT2G38230.1	AT5G01410.2;AT5G01410.1	1550
25.5796	25.5922	25.3427	25.444	25.6761	25.194				-1	7	7	3	38.9	38.9	19.4	12.189	0	18.064	408130000	4	23	AT5G02450.1	AT5G02450.1	1553
25.082	25.2671	25.4014	25.3005	24.8109	25.4609				-1	40	14	12	65.7	31.1	29.2	71.386	0	97.553	739420000	36	49	AT5G02490.1;AT1G56410.1	AT5G02490.1;AT1G56410.1	1554
27.976	28.1279	28.0064	27.9567	27.855	28.1428				-1	48	24	13	68.2	36.1	26.9	71.357	0	323.31	9538100000	37	173	AT5G02500.1;AT5G02500.2	AT5G02500.1;AT5G02500.2	1555
23.2042	NaN	23.6677	23.9825	NaN	23.9514				-1	8	8	8	20.3	20.3	20.3	30.566	0	31.701	117290000	11	13	AT5G02530.2;AT5G02530.1	AT5G02530.2;AT5G02530.1	1556
25.33	25.1776	24.9831	25.1089	24.5163	25.1249				-1	21	6	6	52.2	16.7	16.7	44.592	0	69.208	718710000	18	35	AT5G02870.2;AT5G02870.1	AT5G02870.2;AT5G02870.1	1559
27.252	27.281	27.5889	27.6912	27.0113	26.9437				-1	9	9	9	54.9	54.9	54.9	15.735	0	23.765	1356300000	6	30	AT5G02960.1;AT3G09680.1	AT5G02960.1;AT3G09680.1	1560
24.4869	24.4715	24.4568	24.0178	23.8389	23.9187				-1	11	11	11	32.6	32.6	32.6	40.624	0	40.904	328140000	18	35	AT5G03290.1;AT3G09810.1	AT5G03290.1	1561
23.472	23.4875	23.1935	23.3406	NaN	23.7684				-1	13	13	13	20.6	20.6	20.6	81.052	0	46.34	214540000	37	29	AT5G04130.1;AT3G10270.1;AT3G10270.2;AT5G04130.3;AT5G04130.2	AT5G04130.1;AT3G10270.1;AT3G10270.2;AT5G04130.3;AT5G04130.2	1566
22.8587	22.6669	22.0926	NaN	NaN	22.4529				-1	4	4	4	13	13	13	33.242	0	7.5963	40437000	18	9	AT5G04740.1;AT5G04740.2	AT5G04740.1	1570
24.6379	23.6948	24.7423	24.3899	NaN	24.7468				-1	13	13	13	29	29	29	57.718	0	44.476	309900000	23	39	AT5G05010.2;AT5G05010.1	AT5G05010.2;AT5G05010.1	1571
23.9958	23.7223	23.8075	23.7246	NaN	23.9674				-1	8	8	3	31.5	31.5	13.3	34.728	0	30.672	173360000	16	22	AT5G05780.1;AT5G05780.2	AT5G05780.1;AT5G05780.2	1577
NaN	23.7566	24.1172	23.5529	23.8173	23.768				-1	5	5	5	10.1	10.1	10.1	58.971	0	12.955	113100000	28	14	AT5G06160.1	AT5G06160.1	1581
23.8708	24.0469	23.6315	23.8369	20.6647	24.3889				-1	32	32	23	40.9	40.9	32.5	108.23	0	97.181	512680000	53	87	AT5G07350.1;AT5G07350.2	AT5G07350.1;AT5G07350.2	1589
23.5885	23.9034	NaN	23.7205	NaN	24.0184				-1	8	5	5	24.1	14.6	14.6	44.699	0	19.205	103620000	21	11	AT5G07440.1;AT5G07440.2;AT5G07440.3	AT5G07440.1;AT5G07440.2;AT5G07440.3	1590
24.0842	25.2001	24.7638	24.8273	NaN	23.9037				-1	9	9	4	39.8	39.8	17.6	36.151	0	27.739	237080000	16	17	AT5G08300.1;AT5G23250.2;AT5G23250.3	AT5G08300.1	1592
24.6199	24.4492	24.5863	24.7858	23.7155	25.1012				-1	26	26	26	35.4	35.4	35.4	104.15	0	134.27	861730000	46	81	AT5G08450.3;AT5G08450.2;AT5G08450.1	AT5G08450.3;AT5G08450.2;AT5G08450.1	1594
22.6506	22.6195	22.4446	NaN	NaN	22.0514				-1	5	5	5	9.7	9.7	9.7	65.829	0	13.803	47743000	33	11	AT5G08560.3;AT5G08560.2;AT5G08560.1	AT5G08560.3;AT5G08560.2;AT5G08560.1	1595
26.4495	26.3658	26.3775	26.6253	25.7255	26.73				-1	26	26	25	65.8	65.8	63.8	59.712	0	256.41	4124500000	30	121	AT5G08690.1;AT5G08670.1;AT5G08680.1	AT5G08690.1;AT5G08670.1;AT5G08680.1	1598
27.9068	27.9278	27.9543	28.0585	27.5123	28.5681				-1	45	35	35	62.3	53.2	53.2	72.99	0	323.31	13972000000	38	221	AT5G09590.1;AT4G32208.1	AT5G09590.1	1605
28.673	28.8686	28.7792	28.8371	28.5303	28.933				-1	28	28	9	77.7	77.7	25.5	41.735	0	299.93	15227000000	21	220	AT5G09810.1	AT5G09810.1	1608
24.4364	24.8867	24.6551	24.2668	23.6907	24.1793				-1	13	13	13	31.9	31.9	31.9	50.85	0	74.692	381250000	26	39	AT5G09900.2;AT5G09900.1;AT5G09900.3;AT5G64760.3;AT5G64760.2;AT5G64760.1	AT5G09900.2;AT5G09900.1;AT5G09900.3;AT5G64760.3;AT5G64760.2;AT5G64760.1	1609
23.6096	23.5206	23.5831	23.8929	NaN	24.2833				-1	11	11	6	24.6	24.6	15.9	65.032	0	55.649	228460000	25	28	AT5G10240.2;AT5G10240.1;AT3G47340.2;AT3G47340.1;AT3G47340.4;AT3G47340.3	AT5G10240.2;AT5G10240.1	1610
27.1061	27.2287	26.9983	26.9198	27.1952	26.9178				-1	11	11	4	43.8	43.8	16.9	28.162	0	56.231	1853100000	10	52	AT5G10360.1;AT5G10360.2	AT5G10360.1;AT5G10360.2	1611
23.6908	NaN	23.7163	23.7347	NaN	23.7916				-1	11	8	2	42.3	36.3	10.1	27.975	0	30.439	160120000	16	20	AT5G10450.1;AT5G10450.2;AT5G10450.3;AT5G10450.4	AT5G10450.1;AT5G10450.2;AT5G10450.3;AT5G10450.4	1612
NaN	23.4661	23.6339	23.1068	NaN	23.6936				-1	11	11	5	19.3	19.3	9	79.043	0	40.079	148640000	41	18	AT5G10540.1	AT5G10540.1	1615
23.5068	24.4376	23.4275	24.2626	NaN	23.9807				-1	7	7	7	49.5	49.5	49.5	22.729	0	31.195	199510000	14	24	AT5G10860.1	AT5G10860.1	1619
23.9211	24.002	NaN	24.2525	NaN	24.6763				-1	10	10	10	25.9	25.9	25.9	57.512	0	31.816	196650000	30	24	AT5G10920.1	AT5G10920.1	1620
24.4122	24.1803	24.4106	24.5038	23.2174	24.467				-1	20	18	18	25	23.4	23.4	116.96	0	77.428	470390000	49	56	AT5G11110.1;AT3G14250.1;AT4G10120.5;AT4G10120.4;AT4G10120.3;AT4G10120.2;AT4G10120.1	AT5G11110.1	1622
25.2356	25.4471	24.9522	25.0247	NaN	25.2955				-1	12	12	12	31.9	31.9	31.9	48.337	0	32.261	555780000	21	34	AT5G11200.1;AT5G11170.1;AT5G11200.3;AT5G11200.2;AT5G11170.2	AT5G11200.1;AT5G11170.1;AT5G11200.3;AT5G11200.2;AT5G11170.2	1623
NaN	25.5448	NaN	25.6141	NaN	25.8975				-1	10	5	4	21.8	12	10	48.954	0	14.631	292370000	24	10	AT5G11520.1	AT5G11520.1	1626
24.2854	23.8797	23.613	24.2313	NaN	24.0356				-1	10	10	10	28.9	28.9	28.9	64.412	0	71.992	218300000	30	22	AT5G11670.1;AT5G25880.3;AT5G25880.2;AT5G25880.1;AT2G19900.2;AT2G19900.1	AT5G11670.1	1628
23.949	24.5246	23.8955	23.8886	NaN	23.4799				-1	11	11	3	29.9	29.9	9.2	54.163	0	55.973	276380000	26	26	AT5G11880.1	AT5G11880.1	1631
26.5559	26.3692	26.3928	26.6309	25.9713	26.5644				-1	19	19	18	51.8	51.8	49.8	56.815	0	222.21	2908100000	23	94	AT5G12010.1	AT5G12010.1	1634
26.2637	26.2616	26.1706	26.9465	25.3758	27.0573				-1	11	11	7	62.3	62.3	49.1	24.788	0	42.631	1102600000	9	34	AT5G12110.1	AT5G12110.1	1636
22.5553	22.7241	NaN	23.1507	NaN	23.1749				-1	9	9	9	16.8	16.8	16.8	67.884	0	29.538	95396000	28	19	AT5G12120.1	AT5G12120.1	1637
23.4437	23.3572	23.9029	23.6432	23.5951	23.472				-1	9	9	9	18.3	18.3	18.3	67.991	0	69.967	220490000	36	33	AT5G12220.2;AT5G12220.1	AT5G12220.2;AT5G12220.1	1642
24.4826	24.3629	NaN	24.6522	NaN	24.5768				-1	19	4	3	42.1	13.4	9.1	50.585	0	14.919	173750000	21	11	AT5G12250.1	AT5G12250.1	1644
22.1407	NaN	NaN	22.6106	NaN	22.6056				-1	6	6	6	7.8	7.8	7.8	89.036	0	16.185	48838000	51	12	AT5G12370.3;AT5G12370.2;AT5G12370.1	AT5G12370.3;AT5G12370.2;AT5G12370.1	1645
22.4912	22.7166	22.7863	22.809	NaN	22.9127				-1	6	6	6	20.5	20.5	20.5	41.94	0	23.243	71214000	24	15	AT5G12410.1	AT5G12410.1	1646
23.0218	22.9805	23.1447	22.859	NaN	NaN				-1	4	4	4	10.4	10.4	10.4	41.323	0	9.4993	80328000	17	12	AT5G12470.1	AT5G12470.1	1647
25.0929	24.944	25.0671	25.1174	23.9313	25.1436				-1	22	22	22	42.8	42.8	42.8	77.774	0	131.53	826390000	38	74	AT5G12850.1	AT5G12850.1	1648
23.4026	23.4664	23.3999	23.5574	NaN	23.808				-1	12	12	12	23.5	23.5	23.5	71.097	0	44.9	162850000	40	25	AT5G13030.1	AT5G13030.1	1649
24.1778	24.0428	24.5194	24.5746	NaN	25.0275				-1	12	12	5	22.8	22.8	9.9	67.159	0	64.406	229630000	34	21	AT5G13110.1	AT5G13110.1	1650
NaN	23.5449	22.6206	23.5476	NaN	NaN				-1	3	3	3	17.6	17.6	17.6	27.879	0	15.537	63312000	14	9	AT5G13120.2;AT5G13120.1	AT5G13120.2;AT5G13120.1	1651
24.0201	24.2681	24.2512	24.6192	22.9931	24.2359				-1	12	12	10	29.9	29.9	25.8	62.297	0	46.302	431960000	34	42	AT5G13280.1	AT5G13280.1	1652
24.3019	24.6829	23.8959	24.5142	24.1906	24.7102				-1	13	13	13	37.7	37.7	37.7	47.698	0	60.644	385250000	28	37	AT5G13420.1	AT5G13420.1	1656
22.6641	22.8031	23.4614	22.8109	NaN	22.6459				-1	6	6	6	29.4	29.4	29.4	26.321	0	33.093	88608000	16	19	AT5G13450.1;AT5G13450.2	AT5G13450.1;AT5G13450.2	1658
24.9332	25.0352	25.0331	24.9786	24.9386	25.8275				-1	12	7	7	31.2	19.7	19.7	41.745	0	29.204	584320000	19	32	AT5G13490.2;AT5G13490.1;AT4G28390.2;AT4G28390.1	AT5G13490.2;AT5G13490.1	1659
24.0781	23.8131	24.3024	24.5136	24.7692	24.259				-1	21	21	21	15.8	15.8	15.8	178.08	0	86.077	366790000	83	55	AT5G13530.2;AT5G13530.1	AT5G13530.2;AT5G13530.1	1661
22.8402	24.3283	24.068	23.5594	NaN	23.4298				-1	12	12	12	23.4	23.4	23.4	74.314	0	85.603	206920000	34	35	AT5G13650.1;AT5G13650.2	AT5G13650.1;AT5G13650.2	1664
23.742	23.7788	NaN	24.9322	NaN	23.6892				-1	5	2	2	34.3	15.7	15.7	22.057	0	33.249	116420000	7	10	AT5G13850.1	AT5G13850.1	1666
25.4668	25.2516	25.3339	25.5333	25.6166	25.8669				-1	16	16	16	40	40	40	40.089	0	70.577	1073700000	22	56	AT5G14040.1;AT3G48850.1	AT5G14040.1	1668
23.7633	23.6288	23.9121	23.7786	23.0625	23.3956				-1	10	10	9	26	26	24.2	59.27	0	47.614	219550000	27	31	AT5G14170.1	AT5G14170.1	1670
23.2845	22.8051	23.4256	23.0619	NaN	NaN				-1	9	9	8	9.3	9.3	8.6	153.82	0	72.62	92181000	76	15	AT5G15020.2;AT5G15020.1;AT3G01320.2;AT3G01320.1;AT1G59890.4;AT1G59890.3;AT1G59890.1;AT1G59890.2	AT5G15020.2;AT5G15020.1	1676
24.7585	24.6676	24.3378	24.703	24.3713	25.2943				-1	7	5	5	38.7	34.3	34.3	29.21	0	44.839	311100000	13	20	AT5G15090.2;AT5G15090.1	AT5G15090.2;AT5G15090.1	1677
26.4639	26.7534	26.8548	26.5114	26.6447	26.3609				-1	16	16	8	56.6	56.6	30.3	23.036	0	61.377	2231600000	11	58	AT5G15200.1;AT5G15200.2	AT5G15200.1;AT5G15200.2	1678
25.5145	25.7698	25.6652	24.9613	27.4895	25.7073				-1	8	7	7	42.7	39.2	39.2	27.279	0	70.283	747380000	14	38	AT5G15530.1	AT5G15530.1	1682
22.3894	22.417	22.2273	22.4303	NaN	NaN				-1	4	4	4	9.5	9.5	9.5	47.337	0	10.899	39763000	20	10	AT5G15550.1;AT5G15550.3;AT5G15550.2	AT5G15550.1;AT5G15550.3;AT5G15550.2	1683
24.8874	25.4865	24.9164	24.8859	24.3377	25.3945				-1	13	13	6	56.9	56.9	27.8	40.89	0	69.148	512840000	24	37	AT5G15650.1	AT5G15650.1	1685
23.0207	23.0839	23.3202	22.4978	23.2628	NaN				-1	7	7	7	11.5	11.5	11.5	75.298	0	19.171	103560000	40	21	AT5G15980.1	AT5G15980.1	1688
26.8805	26.9981	27.0793	26.6095	26.2798	26.0229				-1	11	11	8	63.7	63.7	53.7	22.06	0	54.247	1423700000	8	37	AT5G16130.1	AT5G16130.1	1691
27.0206	27.0774	27.3271	27.3102	27.6941	27.2495				-1	15	15	15	47.5	47.5	47.5	52.31	0	197.36	3171900000	19	69	AT5G16220.1	AT5G16220.1	1693
24.6846	24.6326	24.7579	24.6489	NaN	24.8632				-1	12	12	11	29.1	29.1	27.7	52.33	0	42.07	322630000	28	30	AT5G16290.2;AT5G16290.1	AT5G16290.2;AT5G16290.1	1695
31.4615	31.6829	31.1571	31.1768	33.5997	31.3356				-1	15	15	14	44.3	44.3	44.3	29.612	0	101.5	57514000000	12	151	AT5G16390.1;AT5G16390.2	AT5G16390.1;AT5G16390.2	1697
28.0986	NaN	25.2179	27.1528	NaN	NaN				-1	6	6	6	26.5	26.5	26.5	33.214	0	12.609	458690000	18	11	AT5G16440.1;AT3G02780.2;AT3G02780.1	AT5G16440.1	1699
NaN	22.2029	21.8979	22.7053	NaN	21.3178				-1	3	3	3	12.1	12.1	12.1	38.585	0	7.0066	36882000	21	9	AT5G16510.2;AT5G16510.1	AT5G16510.2;AT5G16510.1	1701
24.1665	24.3602	23.944	24.2588	24.6638	23.593				-1	11	11	4	20	20	7.5	70.992	0	38.013	175150000	39	25	AT5G16930.1	AT5G16930.1	1708
25.5744	25.7327	25.2418	25.5531	NaN	25.146				-1	16	16	10	58.3	58.3	36.5	38.133	0	84.077	754470000	18	49	AT5G16970.1;AT5G16980.3;AT5G16980.1;AT5G16980.2;AT5G16960.2;AT5G16960.1;AT1G26320.2;AT3G03080.1;AT1G26320.1	AT5G16970.1	1709
24.3086	24.0161	24.327	24.1619	NaN	23.6685				-1	21	21	21	26.1	26.1	26.1	121.47	0	105.78	387730000	49	53	AT5G17020.2;AT5G17020.1;AT3G03110.1	AT5G17020.2;AT5G17020.1	1712
24.843	25.1771	25.1015	24.8946	24.0007	25.0772				-1	21	21	21	56.6	56.6	56.6	57.066	0	69.462	641500000	24	55	AT5G17330.1;AT2G02010.1;AT2G02010.2;AT2G02000.1;AT3G17760.2;AT3G17760.1;AT1G65960.2;AT1G65960.4;AT1G65960.3;AT1G65960.1;AT3G17720.1	AT5G17330.1	1715
27.4349	27.5833	27.5434	27.2749	27.3137	27.2237				-1	13	13	13	43.2	43.2	43.2	35.493	0	89.123	2325400000	17	54	AT5G17710.3;AT5G17710.1;AT5G17710.2	AT5G17710.3;AT5G17710.1;AT5G17710.2	1722
25.1527	25.2778	24.9348	25.3588	24.7038	25.4822				-1	30	30	12	47.6	47.6	20	84.356	0	178.76	1456200000	38	103	AT5G17920.2;AT5G17920.1;AT5G20980.2;AT5G20980.1;AT2G43800.1	AT5G17920.2;AT5G17920.1	1723
25.9393	26.1107	25.927	26.001	25.8495	26.1639				-1	14	14	14	55.2	55.2	55.2	25.745	0	121.94	1422100000	13	80	AT5G18110.1	AT5G18110.1	1724
24.0127	23.8476	23.7252	23.9021	NaN	24.2949				-1	9	9	6	28.7	28.7	19.2	44.524	0	29.116	163820000	21	18	AT5G18170.1;AT3G03910.2;AT3G03910.1	AT5G18170.1	1725
24.4423	24.3312	24.5304	24.412	24.4375	24.8556				-1	23	23	23	38.2	38.2	38.2	92.951	0	152.39	685430000	35	72	AT5G18230.1;AT5G18230.2;AT5G18230.4;AT5G18230.3	AT5G18230.1;AT5G18230.2;AT5G18230.4;AT5G18230.3	1727
26.4083	26.6065	26.2468	26.1239	26.5223	26.2784				-1	8	8	0	58.2	58.2	0	16.617	0	41.735	1668800000	9	48	AT5G18380.1;AT5G18380.2;AT5G18380.3	AT5G18380.1;AT5G18380.2;AT5G18380.3	1728
24.8532	24.4192	24.8992	24.7351	25.3026	24.9657				-1	6	6	6	11.9	11.9	11.9	53.645	0	14.723	222710000	14	20	AT5G18440.2;AT5G18440.1	AT5G18440.2;AT5G18440.1	1729
24.6717	24.9349	24.2654	24.6957	24.449	24.986				-1	9	9	9	30.7	30.7	30.7	35.593	0	32.648	486520000	16	38	AT5G19440.1	AT5G19440.1	1735
24.4049	24.2561	24.5626	24.4265	23.8727	24.4203				-1	6	6	6	16.2	16.2	16.2	49.036	0	27.213	207490000	21	15	AT5G19485.1	AT5G19485.1	1736
24.9349	25.1092	24.8392	25.0516	24.6882	25.5627				-1	10	6	6	50.4	36.6	36.6	24.201	0	48.202	536880000	10	26	AT5G19510.1	AT5G19510.1	1737
25.8894	26.1792	25.7213	26.2173	25.0878	26.4501				-1	26	26	21	74.3	74.3	63.5	44.266	0	130.54	2703200000	27	100	AT5G19550.1;AT1G62800.1;AT1G62800.2;AT1G62800.3	AT5G19550.1	1738
27.3079	27.194	26.9308	27.3551	26.2866	26.3508				-1	22	9	7	65.1	32.4	24	49.654	0	84.158	2417200000	20	59	AT5G19780.1;AT5G19770.1	AT5G19780.1;AT5G19770.1	1741
22.8925	22.8859	23.6652	23.3886	NaN	23.7696				-1	15	15	15	20.7	20.7	20.7	123.82	0	54.37	167320000	55	32	AT5G19820.1	AT5G19820.1	1742
24.3445	25.1275	25.1609	24.6442	23.107	23.8265				-1	14	13	13	40.6	37.7	37.7	47.247	0	89.123	403080000	24	45	AT5G19990.3;AT5G19990.1;AT5G19990.2;AT5G20000.1;AT4G27680.1	AT5G19990.3;AT5G19990.1;AT5G19990.2;AT5G20000.1	1743
25.8471	25.8625	25.4672	25.9391	25.6487	26.1206				-1	10	10	10	43.4	43.4	43.4	25.079	0	37.194	1161400000	11	40	AT5G55190.1;AT5G20020.1;AT5G20010.1;AT5G55080.1	AT5G55190.1;AT5G20020.1;AT5G20010.1	1744
25.5454	25.5478	25.9594	25.4088	26.0296	25.7253				-1	25	25	23	30.2	30.2	28.6	117.32	0	169.25	1303300000	46	82	AT5G20280.1;AT1G04920.1	AT5G20280.1	1748
27.4374	27.354	27.1412	27.2668	27.062	27.5259				-1	15	15	15	59	59	59	24.993	0	122.39	4138000000	9	72	AT5G20290.1;AT5G59240.1	AT5G20290.1	1749
26.3315	26.4964	26.1144	26.5566	25.954	27.1672				-1	11	11	11	59.7	59.7	59.7	26.802	0	95.053	2205600000	15	46	AT5G20720.4;AT5G20720.3;AT5G20720.2;AT5G20720.1	AT5G20720.4;AT5G20720.3;AT5G20720.2;AT5G20720.1	1753
25.3035	25.2592	25.1827	25.2565	23.7035	25.4183				-1	32	32	24	48.5	48.5	38.1	92.996	0	121.8	1354800000	45	111	AT5G20830.3;AT5G20830.2;AT5G20830.1	AT5G20830.3;AT5G20830.2;AT5G20830.1	1754
26.066	25.9844	25.8945	25.9375	25.8786	25.5328				-1	27	27	27	58.6	58.6	58.6	57.285	0	147.8	1228500000	31	94	AT5G20890.1	AT5G20890.1	1755
23.6143	23.7224	23.3272	23.9862	23.9488	23.8352				-1	6	6	6	33.6	33.6	33.6	30.663	0	34.232	167500000	12	21	AT5G20920.1;AT5G20920.3;AT5G20920.2	AT5G20920.1;AT5G20920.3;AT5G20920.2	1757
24.7768	24.6614	24.7909	24.8657	24.6708	25.3114				-1	16	16	16	23.7	23.7	23.7	91.376	0	83.488	748320000	38	60	AT5G21160.1;AT5G21160.2;AT5G21160.3	AT5G21160.1;AT5G21160.2;AT5G21160.3	1760
24.3591	24.3531	24.2556	24.7821	23.9984	25.0796				-1	19	8	8	48	28.4	28.4	46.438	0	56.464	360200000	18	28	AT5G22060.1	AT5G22060.1	1763
24.2283	24.1632	24.0913	24.5828	23.5958	24.1887				-1	12	12	12	33.6	33.6	33.6	50.323	0	56.487	345910000	23	32	AT5G22330.1	AT5G22330.1	1764
23.8999	23.9789	24.0256	24.3463	24.3933	24.6994				-1	33	33	33	38.2	38.2	38.2	126.08	0	169.13	555720000	59	81	AT5G22450.3;AT5G22450.2;AT5G22450.1	AT5G22450.3;AT5G22450.2;AT5G22450.1	1766
23.8513	23.8041	23.7941	24.0787	23.3279	24.2592				-1	8	8	8	30.5	30.5	30.5	32.218	0	35.628	177020000	15	20	AT5G22650.2;AT5G22650.1	AT5G22650.2;AT5G22650.1	1768
23.1701	22.9321	22.9628	22.8191	NaN	NaN				-1	8	8	8	8.5	8.5	8.5	112.15	0	15.422	86794000	52	20	AT5G22770.6;AT5G22770.5;AT5G22770.4;AT5G22770.3;AT5G22770.2;AT5G22770.1;AT5G22780.2;AT5G22780.1	AT5G22770.6;AT5G22770.5;AT5G22770.4;AT5G22770.3;AT5G22770.2;AT5G22770.1;AT5G22780.2;AT5G22780.1	1769
26.5722	26.4628	26.5363	26.3961	26.4491	26.7361				-1	7	7	1	44.1	44.1	8.3	15.732	0	24.376	1102500000	8	38	AT5G22880.1	AT5G22880.1	1770
24.6423	24.4579	24.6518	24.7428	24.4003	24.823				-1	10	10	10	59.4	59.4	59.4	34.353	0	83.713	536490000	13	46	AT5G23540.1;AT5G23540.2	AT5G23540.1;AT5G23540.2	1776
23.5586	23.5228	NaN	23.3853	NaN	23.8426				-1	6	2	2	39	13.8	13.8	17.749	0	4.8238	94062000	9	5	AT5G23740.1	AT5G23740.1	1778
27.8497	27.6366	27.7854	22.7647	NaN	22.3588				-1	55	55	55	52.4	52.4	52.4	148.07	0	323.31	6308200000	64	188	AT5G24710.1	AT5G24710.1	1785
24.1248	23.5863	23.9493	24.4191	NaN	NaN				-1	5	5	5	26.3	26.3	26.3	28.818	0	29.292	104760000	9	11	AT5G24840.1	AT5G24840.1	1786
29.7685	29.7012	29.7494	29.9883	29.6156	30.0844				-1	70	70	70	64.6	64.6	64.6	108.28	0	323.31	76374000000	52	674	AT5G25060.1;AT5G10800.3;AT5G10800.1;AT5G10800.2	AT5G25060.1	1788
26.7838	26.6878	26.8294	27.0271	26.5961	25.8992				-1	24	24	24	41.7	41.7	41.7	74.413	0	180.98	2431300000	26	98	AT5G25150.1;AT5G25150.2	AT5G25150.1;AT5G25150.2	1789
22.7429	24.1029	23.3507	25.0567	24.1605	23.8445				-1	17	17	6	47.2	47.2	18.9	52.309	0	54.416	242920000	27	31	AT5G25250.1;AT5G64870.1	AT5G25250.1	1790
22.6715	NaN	23.0514	NaN	24.4738	NaN				-1	2	2	2	17.7	17.7	17.7	19.347	0	10.027	47290000	5	8	AT5G25540.1;AT5G25540.3;AT5G25540.2	AT5G25540.1;AT5G25540.3;AT5G25540.2	1792
24.0676	23.8226	23.5487	23.7387	NaN	24.1192				-1	13	13	13	28.4	28.4	28.4	60.182	0	47.36	260160000	26	38	AT5G25757.1;AT5G25754.1	AT5G25757.1;AT5G25754.1	1793
23.1642	23.3433	23.0005	23.5861	NaN	NaN				-1	4	4	4	18.8	18.8	18.8	28.779	0	14.62	97421000	7	13	AT5G26210.1;AT5G20510.3;AT5G20510.1	AT5G26210.1	1795
24.632	24.475	24.64	24.3574	23.9661	25.0702				-1	22	22	22	47.4	47.4	47.4	60.339	0	80.78	534600000	38	60	AT5G26360.1	AT5G26360.1	1796
23.3632	23.4864	23.4624	23.4246	NaN	23.7091				-1	19	19	19	30.2	30.2	30.2	81.064	0	62.919	363930000	40	57	AT5G26710.1	AT5G26710.1	1798
23.016	22.9777	23.0365	23.453	NaN	22.7434				-1	8	8	8	10	10	10	81.155	0	16.178	120930000	37	19	AT5G26742.2;AT5G26742.1;AT5G26742.3	AT5G26742.2;AT5G26742.1;AT5G26742.3	1799
24.2134	24.2333	24.482	24.4259	22.9189	24.7696				-1	20	20	20	36.7	36.7	36.7	80.935	0	98.972	509860000	41	63	AT5G26830.1;AT1G17960.2;AT1G17960.1	AT5G26830.1	1802
25.1914	25.2772	25.2169	25.6872	25.4211	25.8139				-1	35	35	35	42	42	42	109.16	0	234.72	2161200000	53	142	AT5G26860.1;AT3G05780.1;AT3G05790.2;AT3G05790.1	AT5G26860.1	1803
22.8341	23.2215	22.7529	23.2611	NaN	21.6038				-1	9	9	9	22.4	22.4	22.4	51.628	0	36.184	98650000	28	21	AT5G27470.1	AT5G27470.1	1805
24.0755	23.8956	24.1692	23.9529	23.5458	24.1176				-1	14	14	2	22.9	22.9	3.1	81.874	0	41.794	413810000	34	45	AT5G27640.3;AT5G27640.1;AT5G27640.2	AT5G27640.3;AT5G27640.1;AT5G27640.2	1806
26.1464	26.0224	NaN	25.7824	26.4364	26.0447				-1	8	2	2	60.5	20.2	20.2	14.047	0	6.8001	408040000	6	11	AT5G27770.1	AT5G27770.1	1809
26.2856	26.5256	26.3668	26.2102	25.64	26.2971				-1	13	13	4	56.7	56.7	21.9	20.967	0	45.958	1447500000	10	54	AT5G27850.1;AT5G27850.2;AT2G47570.1	AT5G27850.1;AT5G27850.2	1810
25.662	25.3532	NaN	NaN	NaN	25.0532				-1	4	2	2	27.1	18	18	15.419	0	11.398	210540000	4	10	AT5G28060.1	AT5G28060.1	1813
26.6067	26.6404	26.6702	26.7584	26.5327	26.8235				-1	43	39	4	60.4	56.2	9	73.628	0	274.25	3968800000	31	168	AT5G28540.1;AT1G09080.2;AT1G09080.1	AT5G28540.1	1814
32.9144	32.7922	32.5978	32.6829	33.1748	32.5352				-1	56	56	56	89.6	89.6	89.6	58.386	0	323.31	456310000000	31	1424	AT5G35360.1;AT5G35360.3;AT5G35360.2	AT5G35360.1;AT5G35360.3;AT5G35360.2	1818
23.221	23.1984	23.3361	23.5141	NaN	23.3054				-1	10	10	10	15.8	15.8	15.8	86.737	0	45.135	99756000	44	21	AT5G35430.1	AT5G35430.1	1819
27.2425	27.21	27.0259	26.9372	27.1922	27.1155				-1	18	18	5	61.3	61.3	18.5	27.458	0	82.112	3385300000	16	92	AT5G35530.1	AT5G35530.1	1820
23.9986	24.1855	24.0937	24.0557	24.2664	24.211				-1	10	10	6	52.4	52.4	37	27.294	0	53.508	267820000	19	28	AT5G35590.1	AT5G35590.1	1821
23.6577	23.6816	23.8554	23.6419	NaN	24.0926				-1	16	16	11	49.9	49.9	40.1	47.215	0	68.035	275020000	24	38	AT5G36230.1;AT5G36230.2	AT5G36230.1;AT5G36230.2	1824
23.0571	23.3647	23.4702	23.5478	NaN	23.507				-1	8	8	8	12.9	12.9	12.9	81.181	0	32.493	115020000	39	16	AT5G37510.1;AT5G37510.2	AT5G37510.1;AT5G37510.2	1827
23.8636	NaN	23.994	24.158	NaN	24.1427				-1	5	4	3	23.6	20.2	15.7	39.115	0	42.325	121190000	14	7	AT5G37600.1;AT5G16570.1;AT5G16570.2	AT5G37600.1	1828
23.7273	23.8098	23.6762	24.0869	23.6917	23.7944				-1	7	7	7	30.7	30.7	30.7	29.709	0	23.8	191020000	18	25	AT5G37720.2;AT5G37720.1	AT5G37720.2;AT5G37720.1	1829
22.5477	23.0459	22.9702	23.1504	NaN	NaN				-1	5	5	5	14	14	14	40.066	0	13.875	57451000	13	11	AT5G38470.1;AT5G38470.2;AT3G02540.2;AT3G02540.3;AT3G02540.1	AT5G38470.1;AT5G38470.2	1830
25.673	25.7417	25.5028	25.7831	24.9706	25.6197				-1	13	13	7	56.1	56.1	42	28.606	0	85.236	691300000	15	45	AT5G38480.1;AT5G38480.3;AT5G38480.2	AT5G38480.1;AT5G38480.3;AT5G38480.2	1831
26.9455	27.3602	27.2776	27.3496	27.2119	26.4215				-1	15	15	3	38.9	38.9	4.7	34.437	0	73.167	2778900000	10	69	AT5G39740.2;AT5G39740.1	AT5G39740.2;AT5G39740.1	1835
24.8295	24.8269	24.5633	24.6327	NaN	23.2486				-1	6	6	6	50.8	50.8	50.8	20.616	0	26.957	257550000	9	16	AT5G40190.1;AT3G28140.2;AT3G28140.1	AT5G40190.1	1838
22.826	23.619	23.1224	23.3404	NaN	23.5674				-1	3	3	3	32.4	32.4	32.4	11.756	0	9.3172	104020000	6	10	AT5G40370.1;AT5G40370.2	AT5G40370.1;AT5G40370.2	1839
25.297	25.1524	25.3969	25.572	25.3934	25.4727				-1	14	14	14	41.1	41.1	41.1	42.407	0	83.052	876540000	20	55	AT5G40490.1;AT5G40490.2	AT5G40490.1;AT5G40490.2	1840
23.6626	23.791	23.8332	NaN	NaN	22.798				-1	4	4	4	31.1	31.1	31.1	19.733	0	18.165	71139000	10	12	AT5G41520.1;AT5G41520.2	AT5G41520.1;AT5G41520.2	1845
24.6517	24.4848	24.5753	NaN	NaN	24.0473				-1	42	3	3	56.5	5.3	5.3	74.374	0	26.851	166910000	32	10	AT5G42020.3;AT5G42020.1;AT5G42020.2	AT5G42020.3;AT5G42020.1;AT5G42020.2	1848
23.0648	NaN	23.4615	23.6896	NaN	23.4902				-1	7	7	7	26.7	26.7	26.7	35.549	0	15.229	98943000	21	18	AT5G42150.1	AT5G42150.1	1849
24.3386	24.4078	24.4638	24.6233	23.7973	24.744				-1	20	20	20	37	37	37	92.553	0	148.27	655110000	29	65	AT5G42220.2;AT5G42220.1	AT5G42220.2;AT5G42220.1	1851
24.1993	24.1055	23.7949	24.1269	23.179	23.8444				-1	7	7	1	37.8	37.8	11.9	30.476	0	35.402	210010000	16	29	AT5G42790.1	AT5G42790.1	1853
22.2353	22.3652	22.2649	22.7818	22.358	23.0144				-1	13	13	13	11.3	11.3	11.3	187.62	0	60.713	100330000	83	29	AT5G42950.1	AT5G42950.1	1854
25.5119	26.0884	25.8905	25.4742	25.5217	25.652				-1	7	7	7	61.9	61.9	61.9	13.109	0	132.33	756160000	8	29	AT5G42980.1	AT5G42980.1	1855
24.7401	24.753	24.9576	24.6336	NaN	24.496				-1	18	17	3	60.7	57.6	9	44.816	0	91.683	484630000	23	48	AT5G43010.1	AT5G43010.1	1856
26.655	26.6164	26.2532	27.3344	25.4959	26.6637				-1	12	12	6	50.9	50.9	31	35.675	0	88.693	1612500000	17	54	AT5G43330.1	AT5G43330.1	1859
24.7931	24.7577	24.7141	24.6166	23.4931	25.1065				-1	21	21	10	50.1	50.1	25.4	52.125	0	78.946	687100000	30	67	AT5G43780.1	AT5G43780.1	1860
23.3019	24.0059	23.2003	23.3689	NaN	24.4586				-1	5	5	5	22.4	22.4	22.4	40.698	0	15.872	144130000	20	15	AT5G43940.1;AT5G43940.2	AT5G43940.1;AT5G43940.2	1862
27.8481	27.5018	27.7793	28.049	27.7055	28.144				-1	19	19	19	65.6	65.6	65.6	50.122	0	280.04	8223700000	20	100	AT5G43960.1;AT5G43960.2	AT5G43960.1;AT5G43960.2	1863
23.6757	23.7832	23.7013	23.6328	NaN	23.1532				-1	13	13	8	33.2	33.2	20.9	66.223	0	67.213	250450000	21	42	AT5G44320.1	AT5G44320.1	1866
28.9351	28.7173	28.6308	28.9429	28.5176	28.884				-1	26	26	5	69.6	69.6	15.5	49.823	0	323.31	11450000000	20	170	AT5G44340.1	AT5G44340.1	1867
23.406	23.3392	23.3681	23.1938	23.1285	23.1995				-1	12	12	11	6.9	6.9	6.5	247.92	0	39.939	111940000	103	24	AT5G44800.1	AT5G44800.1	1870
23.7396	23.6787	23.7255	23.6952	NaN	23.8665				-1	6	6	6	27	27	27	44.729	0	60.455	135980000	18	14	AT5G46290.2;AT5G46290.1;AT5G46290.3	AT5G46290.2;AT5G46290.1;AT5G46290.3	1877
24.6699	NaN	24.4287	24.1726	NaN	NaN				-1	8	2	2	51.1	21.1	21.1	15.475	0	11.083	134650000	6	8	AT5G46430.2;AT5G46430.1	AT5G46430.2;AT5G46430.1	1878
23.0389	23.0299	23.541	23.3329	22.5382	23.1854				-1	17	17	17	15.2	15.2	15.2	136.87	0	53.288	201860000	58	39	AT5G47010.1	AT5G47010.1	1881
23.4415	23.6652	23.6522	24.0906	23.4459	23.8101				-1	9	9	9	20.8	20.8	20.8	49.437	0	29.26	163360000	24	27	AT5G48030.1	AT5G48030.1	1889
NaN	23.7761	23.2477	23.3511	NaN	24.7117				-1	7	7	7	57.8	57.8	57.8	17.557	0	22.722	153170000	10	17	AT5G48480.1	AT5G48480.1	1894
NaN	24.101	24.3169	23.6306	NaN	24.0388				-1	5	5	5	14.2	14.2	14.2	50.074	0	19.271	105330000	26	11	AT5G48650.1	AT5G48650.1	1895
22.7528	NaN	22.6347	22.9107	NaN	NaN				-1	7	7	7	17.1	17.1	17.1	69.548	0	21.954	66818000	29	14	AT5G48800.1	AT5G48800.1	1897
24.0997	24.3087	24.451	24.313	24.3772	24.6556				-1	21	21	5	45.7	45.7	11.3	65.827	0	117.41	622430000	32	58	AT5G49460.2;AT5G49460.1	AT5G49460.2;AT5G49460.1	1902
27.4873	27.5574	27.5436	27.6158	27.4961	27.5574				-1	48	18	18	50.7	20.5	20.5	76.996	0	78.175	4158900000	36	92	AT5G49910.1	AT5G49910.1	1908
NaN	22.7516	22.7719	NaN	NaN	22.9185				-1	5	5	5	9.2	9.2	9.2	63.694	0	12.229	59464000	32	13	AT5G50320.1	AT5G50320.1	1910
24.7348	24.4994	24.4454	24.5502	24.0694	24.5014				-1	7	7	7	23.4	23.4	23.4	39.175	0	44.674	307710000	16	27	AT5G50850.1	AT5G50850.1	1912
22.803	23.0084	22.8779	23.1226	NaN	23.246				-1	33	8	8	45.7	10.9	10.9	103.45	0	19.568	96593000	44	18	AT5G50920.1;AT5G51070.1	AT5G50920.1	1913
23.2444	23.2006	23.0309	23.5063	NaN	24.029				-1	18	8	8	27.9	15.6	15.6	80.635	0	32.211	112560000	35	19	AT5G52640.1	AT5G52640.1	1923
23.9381	24.5028	23.7137	24.6134	NaN	NaN				-1	5	5	5	33	33	33	19.551	0	13.465	138600000	9	13	AT5G52650.1;AT4G25740.1;AT4G25740.2	AT5G52650.1;AT4G25740.1	1924
23.3926	23.2361	23.4946	23.7376	NaN	23.2737				-1	5	5	5	43.8	43.8	43.8	19.179	0	28.012	115780000	11	14	AT5G52840.1;AT5G52840.2	AT5G52840.1;AT5G52840.2	1925
NaN	23.1405	24.0883	24.2218	NaN	23.4655				-1	7	7	7	14.9	14.9	14.9	96.258	0	90.33	124690000	41	17	AT5G53480.1	AT5G53480.1	1931
NaN	23.2671	23.265	23.4717	NaN	23.6822				-1	8	8	8	16	16	16	76.316	0	36.703	108020000	31	14	AT5G53620.3;AT5G53620.2;AT5G53620.1	AT5G53620.3;AT5G53620.2;AT5G53620.1	1933
24.2682	24.4874	24.2594	24.3615	NaN	23.9977				-1	3	3	3	37.8	37.8	37.8	17.09	0	19.199	149390000	11	11	AT5G54580.1	AT5G54580.1	1939
24.5122	24.3327	24.3474	24.5429	NaN	24.7088				-1	7	7	7	27.8	27.8	27.8	36.664	0	29.492	191740000	13	15	AT5G54770.1	AT5G54770.1	1941
24.9847	25.2311	24.7611	25.2476	24.5773	25.4134				-1	15	15	6	38.7	38.7	16.2	50.925	0	125.66	596600000	27	45	AT5G54810.1	AT5G54810.1	1942
24.4289	23.792	24.1591	24.9412	NaN	NaN				-1	4	4	4	17.1	17.1	17.1	42.323	0	43.884	193610000	12	11	AT5G54900.1	AT5G54900.1	1943
22.7981	23.2346	23.0096	23.4138	NaN	22.7434				-1	9	7	7	18.3	15	15	65.817	0	26.395	120680000	22	20	AT5G54960.1	AT5G54960.1	1944
22.5931	22.5736	22.9484	23.4305	23.1165	23.4574				-1	20	20	20	28.8	28.8	28.8	103.41	0	99.214	169030000	42	49	AT5G55040.2;AT5G55040.1	AT5G55040.2;AT5G55040.1	1945
25.7989	25.6561	25.7342	25.6651	25.6311	26.1553				-1	12	12	5	28.4	28.4	11	50.133	0	62.683	1213900000	23	53	AT5G55070.2;AT5G55070.1	AT5G55070.2;AT5G55070.1	1946
23.9716	24.066	23.934	23.9252	23.9505	24.3288				-1	12	12	12	48.7	48.7	48.7	33.202	0	44.864	259480000	19	32	AT5G55200.1	AT5G55200.1	1947
24.7067	24.3239	24.6341	24.5599	24.5857	24.0527				-1	5	5	5	38.1	38.1	38.1	18.527	0	32.449	265960000	9	16	AT5G55210.1	AT5G55210.1	1948
24.3323	24.495	24.5287	24.403	24.5291	24.6781				-1	10	10	10	38.6	38.6	38.6	45.564	0	74.239	391990000	20	44	AT5G55280.1	AT5G55280.1	1950
26.9596	27.1433	26.9	27.1889	26.4464	27.3297				-1	44	44	1	55.2	55.2	1.6	80.051	0	297.72	5926600000	34	181	AT5G56010.1	AT5G56010.1	1955
24.8758	NaN	25.3219	25.4297	NaN	NaN				-1	43	2	2	53.6	2.7	2.7	80.063	0	5.6931	142450000	34	9	AT5G56030.1;AT5G56030.2	AT5G56030.1;AT5G56030.2	1956
22.55	NaN	22.579	22.3545	NaN	22.8562				-1	5	5	5	11.7	11.7	11.7	80.911	0	16.548	46593000	33	13	AT5G56290.1	AT5G56290.1	1958
23.5826	23.2925	NaN	24.0132	NaN	23.821				-1	8	8	8	28.1	28.1	28.1	54.411	0	24.598	113890000	24	17	AT5G56350.1;AT4G26390.1	AT5G56350.1	1959
25.9267	26.0394	25.7518	26.0933	25.2191	26.3031				-1	28	12	12	51.1	26.5	26.5	63.324	0	73.595	692850000	36	52	AT5G56500.2;AT5G56500.1	AT5G56500.2;AT5G56500.1	1960
26.4947	26.5463	26.6729	26.3574	26.2931	26.5936				-1	19	19	7	47.6	47.6	23.7	53.481	0	131.63	1870700000	25	82	AT5G56630.1	AT5G56630.1	1961
22.8776	23.1134	NaN	22.8443	NaN	23.6844				-1	12	12	12	24.8	24.8	24.8	63.782	0	27.944	102150000	28	23	AT5G56680.1;AT1G70980.1;AT4G17300.1;AT4G17300.2	AT5G56680.1	1962
25.1575	24.768	24.3554	24.6029	NaN	24.5629				-1	3	3	3	37.1	37.1	37.1	8.9448	0	20.06	227190000	3	14	AT5G57290.2;AT5G57290.3;AT5G57290.1	AT5G57290.2;AT5G57290.3;AT5G57290.1	1963
26.6168	26.6544	26.6271	19.4927	NaN	20.2996				-1	27	27	27	46.6	46.6	46.6	70.511	0	153.71	2263700000	32	84	AT5G57460.1	AT5G57460.1	1964
22.932	23.0597	23.1662	23.4747	23.3715	23.5511				-1	6	6	6	30.1	30.1	30.1	21.434	0	24.927	115120000	7	14	AT5G58070.1	AT5G58070.1	1968
24.1573	24.1555	24.1058	24.4933	23.6969	24.1383				-1	10	10	10	26.7	26.7	26.7	48.194	0	35.247	240920000	17	23	AT5G58230.1	AT5G58230.1	1969
24.4077	24.5314	24.2284	24.2462	24.2931	24.615				-1	15	14	14	46.1	43.1	43.1	45.751	0	78.578	538440000	23	46	AT5G58290.1	AT5G58290.1	1970
NaN	23.121	23.3973	23.0383	NaN	NaN				-1	5	5	5	24.9	24.9	24.9	36.39	0	27.376	66811000	20	12	AT5G58330.3;AT5G58330.2;AT5G58330.1	AT5G58330.3;AT5G58330.2;AT5G58330.1	1971
22.9334	22.9687	22.4539	22.5577	NaN	NaN				-1	4	4	3	18.1	18.1	14.7	21.961	0	8.2298	72049000	9	15	AT5G58710.1;AT3G55920.1	AT5G58710.1	1977
NaN	23.2723	22.8724	23.2648	22.6964	NaN				-1	3	3	2	33.9	33.9	22.6	14.124	0	21.238	75387000	5	9	AT5G59880.2;AT5G59880.1	AT5G59880.2;AT5G59880.1	1981
23.4764	23.3101	23.0386	22.8379	NaN	23.6824				-1	17	17	17	24.5	24.5	24.5	108.01	0	84.608	172800000	51	32	AT5G60170.1;AT5G60170.2	AT5G60170.1;AT5G60170.2	1986
24.6178	24.232	24.6468	24.2921	NaN	24.5697				-1	4	4	4	16.4	16.4	16.4	28.518	0	10.502	154570000	14	13	AT5G60230.1;AT5G60230.2	AT5G60230.1;AT5G60230.2	1987
23.3301	23.3061	23.0088	23.4644	NaN	23.6363				-1	8	8	8	17.4	17.4	17.4	66.356	0	71.339	132380000	35	21	AT5G60640.1;AT5G60640.2;AT5G60640.3	AT5G60640.1;AT5G60640.2;AT5G60640.3	1989
23.5729	23.6556	24.035	23.5205	23.0136	23.7774				-1	15	15	15	28.6	28.6	28.6	66.885	0	46.619	238680000	29	40	AT5G60790.1	AT5G60790.1	1992
25.5455	25.4633	25.5568	25.1822	24.6012	25.6741				-1	18	18	18	56.2	56.2	56.2	49.415	0	120.67	1137600000	26	60	AT5G60980.4;AT5G60980.1;AT5G60980.3;AT5G60980.2	AT5G60980.4;AT5G60980.1;AT5G60980.3;AT5G60980.2	1994
22.5177	22.3702	22.4189	22.3736	NaN	22.9328				-1	8	7	7	23.5	20.3	20.3	54.984	0	54.02	76399000	26	13	AT5G61020.2;AT5G61020.1;AT1G79270.4;AT1G79270.3;AT1G79270.2;AT1G79270.1	AT5G61020.2;AT5G61020.1	1996
24.1069	23.9747	24.316	23.8048	NaN	24.3562				-1	28	28	27	16.4	16.4	16	243.17	0	98.431	314600000	112	45	AT5G61140.1;AT5G61140.2	AT5G61140.1;AT5G61140.2	1998
NaN	21.6519	21.7098	NaN	NaN	22.0326				-1	4	3	3	4.4	3.5	3.5	99.986	0	5.4768	26179000	38	7	AT5G61960.9;AT5G61960.8;AT5G61960.7;AT5G61960.6;AT5G61960.5;AT5G61960.4;AT5G61960.11;AT5G61960.3;AT5G61960.2;AT5G61960.10;AT5G61960.1	AT5G61960.9;AT5G61960.8;AT5G61960.7;AT5G61960.6;AT5G61960.5;AT5G61960.4;AT5G61960.11;AT5G61960.3;AT5G61960.2;AT5G61960.10;AT5G61960.1	2003
27.0602	26.7789	26.8676	27.0135	26.431	27.1765				-1	25	9	5	60.4	27.8	17.8	50.733	0	79.219	1646800000	21	46	AT5G62700.1;AT5G62690.1	AT5G62700.1;AT5G62690.1	2009
24.571	24.0174	24.2621	24.9465	23.2877	24.5308				-1	23	21	17	47.5	45.5	37.7	64.62	0	118.23	629350000	36	57	AT5G63120.2;AT5G63120.5;AT5G63120.4;AT5G63120.3;AT5G63120.1	AT5G63120.2;AT5G63120.5;AT5G63120.4;AT5G63120.3;AT5G63120.1	2010
24.0891	24.357	24.2902	23.8723	21.5683	23.6291				-1	23	23	23	24.6	24.6	24.6	141.45	0	105.58	638480000	61	73	AT5G64270.1	AT5G64270.1	2017
24.0282	23.8663	24.4974	24.2142	24.1322	23.8518				-1	8	8	7	21.2	21.2	19.7	57.128	0	34.35	198980000	32	20	AT5G64960.1;AT5G64960.2;AT5G10270.1;AT5G40540.3;AT1G52290.2;AT1G52290.1;AT5G66710.1;AT1G73690.1;AT1G18040.1;AT3G50720.1;AT5G40540.2;AT5G01850.2;AT3G27560.1;AT5G40540.1;AT1G66750.1;AT5G50180.1;AT5G01850.1;AT5G40540.4;AT4G23230.1	AT5G64960.1;AT5G64960.2;AT5G10270.1	2019
26.4953	26.3627	26.4589	26.7218	26.032	26.83				-1	32	32	32	68.4	68.4	68.4	68.736	0	277.43	4275400000	35	149	AT5G65540.1	AT5G65540.1	2023
25.17	25.4461	25.0398	25.3981	24.009	25.0174				-1	14	14	14	41.3	41.3	41.3	50.295	0	63.04	594940000	27	47	AT5G65720.1;AT5G65720.3;AT5G65720.2	AT5G65720.1;AT5G65720.3;AT5G65720.2	2024
23.3072	23.2097	23.258	23.2808	NaN	23.4187				-1	5	5	5	15.4	15.4	15.4	35.142	0	9.652	92018000	22	13	AT5G66570.1;AT3G50820.1	AT5G66570.1;AT3G50820.1	2031
24.1147	23.9567	24.307	24.1595	23.9532	24.2204				-1	10	10	10	18.6	18.6	18.6	69.656	0	52.933	242970000	29	26	AT5G66760.1;AT2G18450.1	AT5G66760.1;AT2G18450.1	2033
24.2982	24.2163	24.3347	24.1041	23.9042	24.4927				-1	13	13	13	35.4	35.4	35.4	52.113	0	60.593	391940000	27	40	AT5G67630.1;AT3G49830.1	AT5G67630.1	2038
NaN	22.8709	22.9003	23.5894	NaN	23.1852				-1	8	7	7	20.3	18.1	18.1	53.933	0	28.677	86731000	28	16	ATCG00480.1	ATCG00480.1	2040
24.2374	24.0918	24.2518	24.4719	23.3098	24.1753				-1	12	12	12	26.5	26.5	26.5	52.954	0	59.518	462920000	22	39	ATCG00490.1;AT2G07732.1	ATCG00490.1	2041
25.3528	24.6457	24.8816	24.9297	24.6458	NaN				-1	4	4	4	28.6	28.6	28.6	22.097	0	109.87	225690000	9	14	ATCG00670.1	ATCG00670.1	2043
22.1822	NaN	22.6345	22.0127	NaN	NaN				-1	3	3	3	16.5	16.5	16.5	25.188	0	5.6003	34624000	15	8	ATCG00800.1	ATCG00800.1	2046
23.1292	23.3316	23.3457	22.9444	NaN	NaN				-1	2	2	2	19.8	19.8	19.8	9.0384	0.00059737	3.3698	60230000	6	9	ATCG01060.1	ATCG01060.1	2048
24.3568	24.5005	24.4094	NaN	NaN	NaN				-1	2	2	2	30.6	30.6	30.6	7.8251	0	9.4956	117460000	1	15	FLAGPUP|SUB|SUB_LABEL	FLAGPUP|SUB|SUB_LABEL	2068
27.9685	27.7403	27.9705	22.4723	21.1935	20.9104				-1	33	33	33	84.6	84.6	84.6	53.8	0	323.31	6561200000	26	132	PafA|BAIT|BAIT_LABEL	PafA|BAIT|BAIT_LABEL	2069

## Sheet: only detected in biotin ind (S)
Proteins only detected in samples from biotin treatment, proteins were eluted by SDS.
SDS_ind_rep1	SDS_ind_rep2	SDS_ind_rep3	SDS_mock_rep1	SDS_mock_rep2	SDS_mock_rep3	Count
+	+	+				9
Protein IDs	Majority protein IDs	id
AT1G04510.2;AT1G04510.1	AT1G04510.2;AT1G04510.1	24
AT1G20670.1	AT1G20670.1	159
AT2G02160.1	AT2G02160.1	514
AT2G41080.1	AT2G41080.1	769
AT3G02650.1	AT3G02650.1	865
AT3G09500.1;AT3G55170.4;AT3G55170.3;AT3G55170.5;AT3G55170.2;AT3G55170.1	AT3G09500.1	922
AT3G55770.5;AT3G55770.3;AT3G55770.2;AT3G55770.1;AT3G55770.6;AT3G55770.4;AT3G55770.7	AT3G55770.5;AT3G55770.3;AT3G55770.2;AT3G55770.1;AT3G55770.6;AT3G55770.4;AT3G55770.7	1227
AT4G24800.4;AT4G24800.3;AT4G24800.2;AT4G24800.1	AT4G24800.4;AT4G24800.3;AT4G24800.2;AT4G24800.1	1434
FLAGPUP|SUB|SUB_LABEL	FLAGPUP|SUB|SUB_LABEL	2068

## Sheet: imputation and t-test (S)
a two-sided t-test for comparison between SDS eluted samples from biotin or mock treatment, with corrected false positive by permutation-based FDR calculation using thresholds FDR = 0.05 and S0 = 1.
Significant	#NAME?	Difference	Protein IDs	Majority protein IDs	id	Symbol color	Symbol type	Symbol size	Show label	Only identified by site	Reverse	Potential contaminant	Taxonomy IDs	Peptides	Razor + unique peptides	Unique peptides	Sequence coverage [%]	Unique + razor sequence coverage [%]	Unique sequence coverage [%]	Mol. weight [kDa]	Q-value	Score	Intensity	iBAQ peptides	MS/MS count	SDS_ind_rep1	SDS_ind_rep2	SDS_ind_rep3	SDS_mock_rep1	SDS_mock_rep2	SDS_mock_rep3
+	3.29642	6.50637	AT1G20760.1	AT1G20760.1	160	Color2 [DarkGray]	1	4					-1	43	42	42	51.1	50.4	50.4	109.82	0	323.31	3695100000	54	125	25.7719	26.9494	26.9949	19.6234	21.045	19.5286
+	3.0522	5.8914	AT1G21630.3;AT1G21630.1;AT1G21630.4;AT1G21630.2;AT1G28490.3;AT1G28490.2	AT1G21630.3;AT1G21630.1;AT1G21630.4;AT1G21630.2	162	Color2 [DarkGray]	1	4					-1	60	60	59	57.4	57.4	56.9	129.45	0	323.31	5881800000	62	175	26.8769	26.8648	26.8676	20.5686	22.2756	20.0909
+	3.02162	6.90114	AT2G07360.1;AT2G07360.2	AT2G07360.1;AT2G07360.2	544	Color2 [DarkGray]	1	4					-1	56	56	56	56.4	56.4	56.4	130.08	0	323.31	5996300000	53	179	27.734	27.6384	27.6499	20.3673	22.2992	19.6522
+	4.51214	5.88676	AT3G01780.1;AT3G01780.2	AT3G01780.1;AT3G01780.2	852	Color2 [DarkGray]	1	4					-1	60	60	60	56.2	56.2	56.2	130.91	0	323.31	10076000000	63	202	28.0775	27.9672	28.1531	21.8421	22.7261	21.9693
+	4.98562	3.96271	AT3G09500.1;AT3G55170.4;AT3G55170.3;AT3G55170.5;AT3G55170.2;AT3G55170.1	AT3G09500.1	922	Color2 [DarkGray]	1	4					-1	5	5	1	30.1	30.1	9.8	14.285	0	13.626	235030000	6	11	25.0754	25.1767	24.927	20.8494	21.24	21.2015
+	3.41675	6.29343	AT3G50590.2;AT3G50590.1	AT3G50590.2;AT3G50590.1	1165	Color2 [DarkGray]	1	4					-1	58	58	58	48	48	48	174.99	0	323.31	5854900000	79	176	27.1804	27.1079	27.2037	20.3774	22.0062	20.2281
+	5.58499	5.20925	AT5G24710.1	AT5G24710.1	1785	Color2 [DarkGray]	1	4					-1	55	55	55	52.4	52.4	52.4	148.07	0	323.31	6308200000	64	188	27.8497	27.6366	27.7854	22.7647	22.5205	22.3588
+	3.18144	6.14086	AT5G57460.1	AT5G57460.1	1964	Color2 [DarkGray]	1	4					-1	27	27	27	46.6	46.6	46.6	70.511	0	153.71	2263700000	32	84	26.6168	26.6544	26.6271	19.4927	21.6835	20.2996
+	3.70615	6.36776	PafA|BAIT|BAIT_LABEL	PafA|BAIT|BAIT_LABEL	2069	Color2 [DarkGray]	1	4					-1	33	33	33	84.6	84.6	84.6	53.8	0	323.31	6561200000	26	132	27.9685	27.7403	27.9705	22.4723	21.1935	20.9104
	0.233706	0.533662	AT1G01470.1	AT1G01470.1	3	Color2 [DarkGray]	1	4					-1	1	1	1	13.9	13.9	13.9	16.543	0	14.534	29295000	6	7	21.4813	23.5591	21.6956	20.4968	22.3096	22.3286
	0.322652	-0.320614	AT1G02080.2;AT1G02080.3;AT1G02080.1	AT1G02080.2;AT1G02080.3;AT1G02080.1	6	Color2 [DarkGray]	1	4					-1	25	25	25	13.5	13.5	13.5	263.76	0	96.502	278630000	104	41	23.1509	23.6199	23.77	23.6299	23.3336	24.5391
	0.404878	0.700205	AT1G02140.1	AT1G02140.1	7	Color2 [DarkGray]	1	4					-1	2	2	2	14	14	14	17.458	0	6.0323	50804000	10	5	22.7864	23.1429	21.6787	21.1695	21.3342	23.0037
	0.342571	0.808608	AT1G02780.1	AT1G02780.1	10	Color2 [DarkGray]	1	4					-1	7	7	3	36	36	24.3	24.606	0	48.008	560720000	6	20	25.6006	25.4376	25.1138	25.1721	22.6848	25.8692
	0.591749	0.886566	AT1G02930.1;AT1G02930.2;AT1G02920.1	AT1G02930.1;AT1G02930.2;AT1G02920.1	13	Color2 [DarkGray]	1	4					-1	6	6	6	34.6	34.6	34.6	23.486	0	17.454	103390000	13	14	22.8558	23.4742	23.235	22.958	21.0122	22.935
	0.128646	0.108099	AT1G03090.2;AT1G03090.1	AT1G03090.2;AT1G03090.1	14	Color2 [DarkGray]	1	4					-1	37	37	37	70.2	70.2	70.2	80.45	0	323.31	44365000000	39	358	29.8896	29.7604	29.8218	29.2417	30.2884	29.6175
	0.92233	1.2471	AT1G03330.1	AT1G03330.1	17	Color2 [DarkGray]	1	4					-1	5	5	5	64.5	64.5	64.5	10.694	0	22.43	241940000	5	16	24.2812	24.3713	24.4183	24.2045	23.1042	22.0208
	0.359473	-0.167531	AT1G03530.1	AT1G03530.1	18	Color2 [DarkGray]	1	4					-1	17	17	17	28.5	28.5	28.5	88.837	0	158.93	1763900000	20	66	26.5169	26.4063	26.6054	26.6189	26.3888	27.0235
	0.615559	0.676255	AT1G04170.2;AT1G04170.1;AT4G18330.1;AT2G18720.2;AT2G18720.1;AT4G18330.2	AT1G04170.2;AT1G04170.1	20	Color2 [DarkGray]	1	4					-1	7	7	7	21.7	21.7	21.7	50.853	0	24.478	174530000	19	23	23.6752	23.6013	23.5254	23.4361	21.9417	23.3953
	0.461557	0.695109	AT1G04270.2;AT1G04270.1;AT5G43640.1;AT5G09500.1	AT1G04270.2;AT1G04270.1	21	Color2 [DarkGray]	1	4					-1	7	7	2	62.3	62.3	8.6	17.058	0	53.845	1269100000	7	45	27.1795	26.0637	25.9086	26.1073	26.2906	24.6687
	0.0614215	0.102425	AT1G04410.1;AT5G56720.1	AT1G04410.1	22	Color2 [DarkGray]	1	4					-1	11	5	5	46.1	26.2	26.2	35.571	0	40.706	561970000	18	29	25.1966	26.0002	24.983	25.6423	24.3249	25.9052
	0.39222	0.112085	AT3G04400.2;AT2G33370.2;AT3G04400.1;AT2G33370.1;AT1G04480.1	AT3G04400.2;AT2G33370.2;AT3G04400.1;AT2G33370.1;AT1G04480.1	23	Color2 [DarkGray]	1	4					-1	6	6	6	63.2	63.2	63.2	13.406	0	33.884	1206200000	8	26	26.7519	26.7304	26.6697	26.4339	26.5502	26.8316
	2.45413	0.630831	AT1G04510.2;AT1G04510.1	AT1G04510.2;AT1G04510.1	24	Color2 [DarkGray]	1	4					-1	5	5	4	9	9	6.9	56.881	0	8.8612	51890000	26	11	22.5879	22.5792	22.4566	21.9541	21.7318	22.0454
	0.379059	0.457467	AT1G04690.1	AT1G04690.1	25	Color2 [DarkGray]	1	4					-1	6	6	6	17.7	17.7	17.7	36.538	0	9.3544	107810000	19	17	23.3589	23.5579	23.2345	23.1912	21.9623	23.6253
	0.915763	0.965206	AT1G04810.1	AT1G04810.1	27	Color2 [DarkGray]	1	4					-1	16	6	6	21.4	6.8	6.8	108.86	0	15.018	127340000	41	16	23.9984	23.7755	23.7165	23.3602	21.8957	23.3388
	0.0672609	-0.250154	AT1G05805.1	AT1G05805.1	34	Color2 [DarkGray]	1	4					-1	6	6	6	25.7	25.7	25.7	38.951	0	50.847	138320000	16	18	23.578	20.9932	23.8165	23.841	21.1905	24.1066
	0.149018	0.163718	AT1G06130.2;AT1G06130.1	AT1G06130.2;AT1G06130.1	38	Color2 [DarkGray]	1	4					-1	3	3	3	13	13	13	36.496	0	12.467	24763000	17	8	22.1028	22.0136	21.8911	22.5015	21.1054	21.9094
	0.664668	0.656696	AT1G06220.3;AT1G06220.2;AT1G06220.1;AT5G25230.2;AT5G25230.1	AT1G06220.3;AT1G06220.2;AT1G06220.1;AT5G25230.2;AT5G25230.1	40	Color2 [DarkGray]	1	4					-1	30	30	30	39.5	39.5	39.5	110.44	0	114.77	521120000	50	64	24.3863	23.8654	24.127	24.0669	22.6549	23.6868
	0.723283	1.18667	AT1G06410.3;AT1G06410.2;AT1G06410.1;AT1G68020.1;AT1G68020.3;AT1G68020.2;AT2G18700.1	AT1G06410.3;AT1G06410.2;AT1G06410.1	41	Color2 [DarkGray]	1	4					-1	16	16	16	25	25	25	96.687	0	48.525	173610000	46	22	23.062	23.2991	23.246	23.4748	21.5665	21.0058
	0.0734256	-0.140109	AT1G06950.1	AT1G06950.1	44	Color2 [DarkGray]	1	4					-1	9	9	9	11	11	11	112.12	0	25.991	85722000	50	14	21.4408	22.9928	22.7729	23.0122	21.6191	22.9955
	0.0584249	-0.11432	AT1G07140.1;AT2G30060.1	AT1G07140.1	46	Color2 [DarkGray]	1	4					-1	6	6	6	34.2	34.2	34.2	25.601	0	33.884	80872000	13	16	22.6912	23.1003	21.8911	23.0641	21.5406	23.4209
	0.000120616	-0.000100454	AT1G07360.1;AT5G07060.2;AT5G07060.1	AT1G07360.1	50	Color2 [DarkGray]	1	4					-1	8	8	6	17	17	12.7	53.587	0	19.473	131320000	22	22	23.5287	23.2992	23.9009	23.1629	23.8031	23.7631
	0.580657	-0.502181	AT5G59970.2;AT5G59970.1;AT5G59690.1;AT3G53730.1;AT3G46320.1;AT3G45930.1;AT2G28740.1;AT1G07820.2;AT1G07820.1;AT1G07660.1;AT1G07660.2	AT5G59970.2;AT5G59970.1;AT5G59690.1;AT3G53730.1;AT3G46320.1;AT3G45930.1;AT2G28740.1;AT1G07820.2;AT1G07820.1;AT1G07660.1;AT1G07660.2	53	Color2 [DarkGray]	1	4					-1	6	6	6	51.5	51.5	51.5	11.409	0	22.812	478730000	6	26	25.7755	25.3381	25.3567	25.3741	26.6146	25.9881
	0.0534382	-0.0385539	AT1G07705.2;AT1G07705.1	AT1G07705.2;AT1G07705.1	55	Color2 [DarkGray]	1	4					-1	14	14	14	29.3	29.3	29.3	65.816	0	93.827	447550000	25	48	24.9348	24.7707	24.8626	24.9127	24.4633	25.3077
	0.935056	-0.266086	AT1G07750.1;AT2G28680.1	AT1G07750.1	56	Color2 [DarkGray]	1	4					-1	9	9	9	35.4	35.4	35.4	38.31	0	40.097	253580000	18	21	24.3025	24.3394	24.0459	24.4977	24.3282	24.6601
	0.500326	0.0991681	AT5G59850.1;AT1G07770.3;AT1G07770.2;AT1G07770.1;AT2G39590.1	AT5G59850.1;AT1G07770.3;AT1G07770.2;AT1G07770.1	57	Color2 [DarkGray]	1	4					-1	10	10	3	74.6	74.6	23.8	14.804	0	36.472	1682100000	8	30	27.2425	27.2256	27.1842	27.1107	27.2689	26.9753
	0.146628	0.0985998	AT1G07890.6;AT1G07890.8;AT1G07890.7;AT1G07890.5;AT1G07890.4;AT1G07890.3;AT1G07890.2;AT1G07890.1	AT1G07890.6;AT1G07890.8;AT1G07890.7;AT1G07890.5;AT1G07890.4;AT1G07890.3;AT1G07890.2;AT1G07890.1	60	Color2 [DarkGray]	1	4					-1	12	12	11	55.4	55.4	55.4	27.52	0	71.415	990330000	14	50	25.6874	26.0211	25.7645	26.169	25.6024	25.4057
	0.00676985	0.00665983	AT5G60390.3;AT5G60390.2;AT5G60390.1;AT1G07940.4;AT1G07940.3;AT1G07940.2;AT1G07940.1;AT1G07930.1;AT1G07920.1;AT1G07930.2;AT1G35550.1	AT5G60390.3;AT5G60390.2;AT5G60390.1;AT1G07940.4;AT1G07940.3;AT1G07940.2;AT1G07940.1;AT1G07930.1;AT1G07920.1;AT1G07930.2	61	Color2 [DarkGray]	1	4					-1	29	29	29	60.1	60.1	60.1	49.502	0	202.31	26649000000	25	225	29.8828	29.8524	29.7071	29.9969	29.1864	30.2391
	0.0486418	0.14399	AT1G07960.4;AT1G07960.3;AT1G07960.2;AT1G07960.1	AT1G07960.4;AT1G07960.3;AT1G07960.2;AT1G07960.1	62	Color2 [DarkGray]	1	4					-1	3	3	3	26.7	26.7	26.7	16.565	0	14.277	104110000	8	10	23.6999	21.8666	24.2696	23.6077	24.0584	21.7381
	0.366559	0.731235	AT1G09620.1	AT1G09620.1	73	Color2 [DarkGray]	1	4					-1	8	8	8	12	12	12	123.45	0	32.114	77793000	53	16	21.3781	22.7277	24.0143	21.9857	22.5599	21.3808
	0.457976	-0.286416	AT1G09640.1;AT1G09640.2	AT1G09640.1;AT1G09640.2	74	Color2 [DarkGray]	1	4					-1	13	13	7	35.3	35.3	19.6	46.66	0	79.609	943500000	17	62	25.1445	25.2855	25.1714	25.6511	24.9659	25.8437
	0.465899	0.380821	AT1G09780.1	AT1G09780.1	76	Color2 [DarkGray]	1	4					-1	15	9	9	43.8	27.8	27.8	60.579	0	36.093	170200000	31	20	23.6712	23.7656	24.0394	23.8296	22.7754	23.7288
	0.0453452	-0.108224	AT1G10200.1;AT1G10200.2	AT1G10200.1;AT1G10200.2	79	Color2 [DarkGray]	1	4					-1	4	4	4	21.1	21.1	21.1	21.04	0	18.749	82974000	11	10	23.599	23.5538	21.3155	23.123	23.3488	22.3212
	0.142508	0.247363	AT1G10270.1	AT1G10270.1	80	Color2 [DarkGray]	1	4					-1	13	13	13	14	14	14	102.09	0	35.24	172000000	40	35	23.0956	23.1158	23.1443	23.3597	21.596	23.658
	1.29178	0.352201	AT5G14670.3;AT5G14670.2;AT1G10630.1;AT3G62290.3;AT3G62290.2;AT3G62290.1;AT2G47170.3;AT2G47170.2;AT2G47170.1;AT1G70490.7;AT1G70490.6;AT1G70490.5;AT1G70490.4;AT1G70490.3;AT1G70490.2;AT1G70490.1;AT1G23490.1;AT1G10630.2;AT5G14670.1	AT5G14670.3;AT5G14670.2;AT1G10630.1;AT3G62290.3;AT3G62290.2;AT3G62290.1;AT2G47170.3;AT2G47170.2;AT2G47170.1;AT1G70490.7;AT1G70490.6;AT1G70490.5;AT1G70490.4;AT1G70490.3;AT1G70490.2;AT1G70490.1;AT1G23490.1;AT1G10630.2;AT5G14670.1	84	Color2 [DarkGray]	1	4					-1	8	8	8	47.5	47.5	47.5	20.693	0	59.271	1721200000	10	43	26.6327	26.8295	26.6573	26.5246	26.3947	26.1437
	0.551142	0.216743	AT1G10840.1;AT1G10840.2	AT1G10840.1;AT1G10840.2	86	Color2 [DarkGray]	1	4					-1	8	8	8	28.8	28.8	28.8	38.372	0	35.616	244260000	16	31	23.787	24.0314	24.3828	23.8109	23.864	23.8761
	0.265082	0.526854	AT1G11580.1;AT1G11580.2;AT3G10720.1;AT1G53830.1;AT4G15980.1;AT3G49220.3;AT5G53370.2;AT3G10720.2;AT3G49220.1;AT3G14310.1;AT1G02810.1;AT5G53370.1;AT4G33220.2;AT1G23200.1;AT2G26440.1;AT4G33220.1;AT3G60730.1;AT4G02320.1;AT4G15980.2	AT1G11580.1;AT1G11580.2	89	Color2 [DarkGray]	1	4					-1	11	11	11	27.1	27.1	27.1	61.687	0	75.805	283660000	26	33	24.1536	24.2501	23.9207	24.3593	22.0059	24.3786
	0.420015	0.628958	AT1G11840.4;AT1G11840.3;AT1G11840.2;AT1G11840.1;AT1G11840.6;AT1G11840.5;AT1G67280.2;AT1G67280.1	AT1G11840.4;AT1G11840.3;AT1G11840.2;AT1G11840.1;AT1G11840.6;AT1G11840.5	91	Color2 [DarkGray]	1	4					-1	7	7	7	28.3	28.3	28.3	31.928	0	48.147	159400000	12	15	23.7686	23.9336	23.2901	23.776	21.8289	23.5006
	1.09556	0.513832	AT1G12310.1	AT1G12310.1	98	Color2 [DarkGray]	1	4					-1	5	5	2	39.2	39.2	18.9	16.517	0	31.412	86824000	11	15	23.2254	23.1378	22.8932	22.7083	22.1836	22.823
	0.125508	0.150696	AT1G13020.1;AT3G26400.1	AT1G13020.1	102	Color2 [DarkGray]	1	4					-1	28	28	28	53.6	53.6	53.6	59.324	0	73.431	634720000	37	89	24.1809	24.1981	24.3704	24.4478	23.2336	24.6158
	0.382906	1.2307	AT1G13440.1;AT1G13440.2	AT1G13440.1;AT1G13440.2	105	Color2 [DarkGray]	1	4					-1	25	2	2	76.9	10.4	10.4	36.913	0	50.133	622770000	21	10	26.2173	26.284	26.2053	26.5743	22.3142	26.1259
	1.43219	0.0976671	AT1G13730.2;AT1G13730.1	AT1G13730.2;AT1G13730.1	107	Color2 [DarkGray]	1	4					-1	18	18	18	65.4	65.4	65.4	46.803	0	225.27	2375100000	20	98	26.2576	26.307	26.2996	26.2155	26.135	26.2207
	0.328523	1.45848	AT1G14320.1;AT1G14320.2	AT1G14320.1;AT1G14320.2	108	Color2 [DarkGray]	1	4					-1	11	5	3	47.7	20	9.5	24.917	0	16.572	441280000	11	15	25.6022	25.6604	25.7291	25.8411	20.5593	26.2159
	0.421647	0.169383	AT1G14410.1	AT1G14410.1	110	Color2 [DarkGray]	1	4					-1	7	5	5	33.5	25.9	25.9	29.058	0	42.027	276590000	14	21	24.29	24.4576	24.3229	24.1424	23.9295	24.4903
	0.0945505	0.117729	AT1G14650.3;AT1G14650.2;AT1G14650.1;AT1G14640.2;AT1G14640.1	AT1G14650.3;AT1G14650.2;AT1G14650.1	113	Color2 [DarkGray]	1	4					-1	21	21	21	34.5	34.5	34.5	87.593	0	105.53	627120000	34	72	23.921	23.9884	24.1212	24.143	23.0349	24.4994
	0.0247637	0.0304782	AT1G14810.1;AT1G14810.2	AT1G14810.1;AT1G14810.2	115	Color2 [DarkGray]	1	4					-1	11	11	11	38.7	38.7	38.7	40.745	0	74.962	533710000	16	40	24.7162	25.0818	24.8893	24.7813	24.2215	25.5931
	0.333735	-0.213494	AT1G14980.1;AT1G14980.2	AT1G14980.1;AT1G14980.2	117	Color2 [DarkGray]	1	4					-1	9	9	9	72.4	72.4	72.4	10.812	0	22.164	424460000	7	31	24.5515	24.768	24.3218	24.5368	24.5241	25.221
	0.427857	-0.909885	AT1G15340.2;AT1G15340.1	AT1G15340.2;AT1G15340.1	120	Color2 [DarkGray]	1	4					-1	3	3	3	11.1	11.1	11.1	36.502	0	22.165	10116000	19	10	19.4902	20.2553	21.5988	20.7689	22.6907	20.6144
	0.163579	-0.236537	AT1G15690.1;AT1G15690.2	AT1G15690.1;AT1G15690.2	125	Color2 [DarkGray]	1	4					-1	6	6	6	10.4	10.4	10.4	80.819	0	23.374	90877000	27	16	22.522	22.8212	22.4439	23.1462	21.7953	23.5552
	0.526179	1.79022	AT1G15930.2;AT1G15930.1	AT1G15930.2;AT1G15930.1	128	Color2 [DarkGray]	1	4					-1	6	6	3	63.9	63.9	46.5	15.377	0	36.676	1146300000	9	21	26.4387	26.6634	26.7205	26.1377	21.8352	26.4791
	0.820764	-0.265499	AT1G16270.3;AT1G16270.2;AT1G16270.1;AT5G57610.1	AT1G16270.3;AT1G16270.2;AT1G16270.1	129	Color2 [DarkGray]	1	4					-1	56	40	39	61.7	49.4	48.7	126.78	0	323.31	11580000000	46	260	28.0163	28.0338	28.047	28.2606	28.0595	28.5735
	0.678673	-0.838572	AT1G17290.1;AT1G72330.3;AT5G62390.1	AT1G17290.1;AT1G72330.3	135	Color2 [DarkGray]	1	4					-1	9	9	4	19.9	19.9	9.2	59.82	0	38.171	78501000	29	12	21.6787	23.0248	21.7604	23.3458	22.2851	23.3487
	0.259178	-0.137875	AT1G17440.2;AT1G17440.1	AT1G17440.2;AT1G17440.1	136	Color2 [DarkGray]	1	4					-1	9	9	9	16.3	16.3	16.3	74.805	0	60.314	696380000	17	45	25.2894	25.3086	25.3546	25.1543	25.3502	25.8618
	0.346415	0.115677	AT1G18080.1	AT1G18080.1	140	Color2 [DarkGray]	1	4					-1	15	12	12	50.5	43.4	43.4	35.747	0	73.965	1140900000	20	48	25.9221	25.7457	25.9279	25.7043	25.5595	25.9848
	0.0460439	-0.0516542	AT1G18450.1;AT1G73910.2;AT1G73910.1;AT1G73910.3	AT1G18450.1	142	Color2 [DarkGray]	1	4					-1	20	20	20	67.1	67.1	67.1	48.936	0	220.2	1128600000	25	85	25.2679	25.1602	25.3361	25.3299	24.6363	25.9529
	0.357692	0.911448	AT1G18540.1	AT1G18540.1	143	Color2 [DarkGray]	1	4					-1	15	5	5	48.9	20.6	20.6	26.152	0	8.3916	168630000	12	20	24.171	24.8148	24.2314	24.7306	21.425	24.3274
	0.345248	0.98912	AT1G19660.1;AT1G19660.2;AT1G19660.3	AT1G19660.1;AT1G19660.2;AT1G19660.3	148	Color2 [DarkGray]	1	4					-1	5	5	4	17.9	17.9	15.2	37.051	0	23.613	265980000	18	20	24.4432	24.3658	24.4389	24.5345	21.0548	24.6913
	0.377396	0.682591	AT1G20110.1	AT1G20110.1	152	Color2 [DarkGray]	1	4					-1	14	14	14	26.3	26.3	26.3	65.395	0	57.992	504800000	24	61	23.9237	24.3675	24.532	24.237	22.1214	24.417
	0.833179	0.599662	AT1G20200.1	AT1G20200.1	154	Color2 [DarkGray]	1	4					-1	15	15	7	37.3	37.3	20.3	55.582	0	82.577	448300000	33	51	24.5877	24.2315	24.3183	24.1976	23.1598	23.9811
	0.450271	0.930964	AT1G20220.1	AT1G20220.1	155	Color2 [DarkGray]	1	4					-1	7	7	7	28.3	28.3	28.3	33.763	0	42.079	269770000	11	28	24.3438	24.0244	24.5577	24.1431	21.6294	24.3605
	0.879412	1.55378	AT1G20580.1;AT1G20600.1	AT1G20580.1	158	Color2 [DarkGray]	1	4					-1	3	3	2	26	26	18.3	14.237	0	9.9125	142770000	8	13	24.795	24.668	24.4626	24.5124	21.6821	23.0697
	0.591037	0.641374	AT1G20670.1	AT1G20670.1	159	Color2 [DarkGray]	1	4					-1	6	6	6	11.5	11.5	11.5	72.955	0	13.29	53836000	39	10	22.2938	22.1954	23.0645	21.1384	21.9809	22.5103
	0.224674	0.271758	AT1G20960.1;AT1G20960.2;AT2G42270.1	AT1G20960.1;AT1G20960.2	161	Color2 [DarkGray]	1	4					-1	18	17	17	9.8	9.4	9.4	247.1	0	37.752	165770000	114	35	22.9048	22.8758	22.6154	22.9457	21.6011	23.0339
	0.180183	0.2819	AT1G21700.1	AT1G21700.1	164	Color2 [DarkGray]	1	4					-1	16	16	16	27.9	27.9	27.9	88.249	0	121.66	451040000	33	44	24.1674	24.2854	24.6577	24.6095	22.937	24.7182
	1.1027	-0.552149	AT1G21750.2;AT1G21750.1	AT1G21750.2;AT1G21750.1	166	Color2 [DarkGray]	1	4					-1	6	6	4	15.8	15.8	11.3	54.158	0	20.493	48543000	33	14	21.7992	21.8975	21.8024	22.3657	21.9913	22.7986
	1.65145	0.513707	AT4G09800.1;AT1G34030.1;AT1G22780.1	AT4G09800.1;AT1G34030.1;AT1G22780.1	171	Color2 [DarkGray]	1	4					-1	9	9	9	52.6	52.6	52.6	17.545	0	93.865	1714000000	8	46	26.6819	26.773	26.5835	26.2405	26.3456	25.9112
	0.0523216	-0.250469	AT1G22840.1;AT1G22840.2;AT4G10040.1	AT1G22840.1;AT1G22840.2;AT4G10040.1	172	Color2 [DarkGray]	1	4					-1	3	3	3	22.8	22.8	22.8	12.394	0	5.1356	131670000	8	13	24.4359	24.687	21.022	24.6016	21.3467	24.9482
	0.156479	-0.453765	AT1G22920.2;AT1G22920.1;AT1G71230.1	AT1G22920.2;AT1G22920.1	174	Color2 [DarkGray]	1	4					-1	8	8	8	33.9	33.9	33.9	39.105	0	37.533	100530000	18	13	23.022	20.8175	23.2079	22.9472	21.4068	24.0547
	0.428502	-0.366201	AT1G23190.1	AT1G23190.1	178	Color2 [DarkGray]	1	4					-1	9	9	4	21.3	21.3	11.5	63.17	0	39.068	142070000	36	21	22.9111	22.9641	22.7856	23.2755	22.6162	23.8676
	0.224305	0.198104	AT1G23230.2;AT1G23230.3;AT1G23230.1	AT1G23230.2;AT1G23230.3;AT1G23230.1	179	Color2 [DarkGray]	1	4					-1	11	11	11	10.4	10.4	10.4	177.64	0	38.353	63099000	63	18	22.4633	22.712	22.5359	22.6953	21.6984	22.7232
	0.562227	1.60393	AT1G23280.1	AT1G23280.1	180	Color2 [DarkGray]	1	4					-1	9	9	9	30.4	30.4	30.4	35.759	0	60.047	351490000	15	21	25.0044	24.8157	24.8542	24.6234	24.4802	20.7589
	0.37221	0.375571	AT1G23290.1;AT1G70600.1	AT1G23290.1;AT1G70600.1	181	Color2 [DarkGray]	1	4					-1	8	8	8	49.3	49.3	49.3	16.292	0	23.196	1859800000	8	30	27.3529	27.4197	26.9838	27.3846	26.0866	27.1585
	0.401626	0.370173	AT1G23900.3;AT1G23900.2;AT1G23900.1;AT1G23935.3;AT1G23935.2;AT1G23935.1	AT1G23900.3;AT1G23900.2;AT1G23900.1	183	Color2 [DarkGray]	1	4					-1	9	9	7	13.7	13.7	11.3	95.105	0	40.574	76757000	39	17	22.703	21.9142	22.8719	22.2059	21.6494	22.5233
	0.177669	0.265318	AT1G24180.1	AT1G24180.1	185	Color2 [DarkGray]	1	4					-1	12	12	9	32.8	32.8	24.4	43.358	0	33.806	186080000	20	32	23.2946	23.3822	23.0475	23.4882	21.861	23.5791
	0.0143861	0.00801086	AT1G24300.1;AT1G24300.2;AT1G24300.3	AT1G24300.1;AT1G24300.2;AT1G24300.3	188	Color2 [DarkGray]	1	4					-1	82	82	62	73.2	73.2	60.7	166.27	0	323.31	11574000000	77	419	27.1368	27.2357	27.283	27.2814	26.8708	27.4794
	0.180006	0.34798	AT1G24360.1	AT1G24360.1	189	Color2 [DarkGray]	1	4					-1	4	4	4	14.7	14.7	14.7	33.548	0	18.317	130510000	16	16	23.2928	23.4563	23.0997	23.4008	21.5074	23.8966
	0.0926206	0.0532335	AT1G24510.1;AT1G24510.2;AT1G24510.3;AT1G67760.1	AT1G24510.1;AT1G24510.2;AT1G24510.3	190	Color2 [DarkGray]	1	4					-1	14	14	14	31.6	31.6	31.6	59.384	0	99.879	742390000	30	57	25.1494	25.2665	25.12	25.0559	24.8189	25.5015
	2.06551	-0.484368	AT1G26110.2;AT1G26110.1	AT1G26110.2;AT1G26110.1	192	Color2 [DarkGray]	1	4					-1	19	19	19	37.2	37.2	37.2	63.66	0	233.18	8772800000	17	119	28.1698	28.0198	28.3238	28.7172	28.5576	28.6918
	0.0367026	0.0374018	AT1G26630.1;AT1G26630.2	AT1G26630.1;AT1G26630.2	195	Color2 [DarkGray]	1	4					-1	12	12	9	83	83	66	17.14	0	198.18	2742900000	10	71	27.2232	27.4358	27.0413	27.354	26.5694	27.6649
	0.0598895	0.052983	AT1G26880.1;AT1G26880.2	AT1G26880.1;AT1G26880.2	196	Color2 [DarkGray]	1	4					-1	4	4	2	33.3	33.3	16.7	13.705	0	8.7279	1183600000	4	21	26.9175	27.1265	26.8265	26.3183	27.1625	27.2308
	1.199	-0.444096	AT1G27090.1	AT1G27090.1	197	Color2 [DarkGray]	1	4					-1	18	18	18	64.8	64.8	64.8	46.018	0	286.36	1197000000	23	83	25.0256	24.9038	25.1883	25.4246	25.252	25.7734
	0.432562	-0.109468	AT1G27430.1;AT1G27430.3;AT1G27430.2	AT1G27430.1;AT1G27430.3;AT1G27430.2	200	Color2 [DarkGray]	1	4					-1	77	57	57	69.2	57.8	57.8	165.43	0	323.31	5925000000	81	277	26.3909	26.4396	26.4656	26.527	26.3655	26.7321
	0.664103	1.4148	AT1G27450.4;AT1G27450.2;AT1G27450.1;AT1G27450.3	AT1G27450.4;AT1G27450.2;AT1G27450.1;AT1G27450.3	201	Color2 [DarkGray]	1	4					-1	5	5	5	40.4	40.4	40.4	19.739	0	24.303	169660000	10	20	23.8031	24.4387	23.6167	24.3277	21.186	22.1003
	0.0353923	0.0416959	AT1G27752.1;AT1G27752.2	AT1G27752.1;AT1G27752.2	204	Color2 [DarkGray]	1	4					-1	8	8	8	12.4	12.4	12.4	96.421	0	34.433	140890000	39	22	23.5291	23.16	23.4783	23.5118	22.6198	23.9106
	0.112615	-0.0892124	AT1G29030.2;AT1G29030.1	AT1G29030.2;AT1G29030.1	207	Color2 [DarkGray]	1	4					-1	11	11	10	22.1	22.1	20.4	59.8	0	25.96	82138000	35	24	22.2452	22.3602	22.6232	22.9945	22.091	22.4107
	0.558482	1.53955	AT1G29150.2;AT1G29150.1	AT1G29150.2;AT1G29150.1	208	Color2 [DarkGray]	1	4					-1	15	15	15	44.9	44.9	44.9	46.749	0	54.859	437130000	23	42	24.4072	24.5993	24.8647	24.3014	20.6536	24.2976
	0.121277	0.285926	AT1G29370.1;AT1G29350.1;AT1G29370.2	AT1G29370.1;AT1G29350.1;AT1G29370.2	210	Color2 [DarkGray]	1	4					-1	10	10	10	16.8	16.8	16.8	90.887	0	62.288	375480000	22	35	24.1432	23.9276	24.2418	24.5269	22.1153	24.8125
	1.16994	1.16986	AT1G29400.3;AT1G29400.2;AT1G29400.1;AT3G26120.1	AT1G29400.3;AT1G29400.2;AT1G29400.1	211	Color2 [DarkGray]	1	4					-1	7	7	7	10.9	10.9	10.9	88.211	0	17.795	99843000	32	17	23.1439	23.0137	23.6139	22.9516	21.5988	21.7115
	0.599188	0.820953	AT1G29880.1;AT3G44740.5;AT3G44740.4;AT3G44740.3;AT3G44740.1	AT1G29880.1	212	Color2 [DarkGray]	1	4					-1	7	7	7	9.3	9.3	9.3	81.943	0	15.572	54260000	43	14	22.4963	22.5819	22.6987	22.9779	21.0073	21.3287
	0.186376	0.59643	AT1G30230.1;AT1G30230.2	AT1G30230.1;AT1G30230.2	217	Color2 [DarkGray]	1	4					-1	10	5	5	45	27.3	27.3	25.132	0	11.839	146980000	11	12	24.0665	22.414	23.6116	24.9693	21.326	22.0074
	1.83502	-0.497236	AT1G30480.1	AT1G30480.1	218	Color2 [DarkGray]	1	4					-1	18	18	18	58.1	58.1	58.1	42.318	0	180.88	11490000000	22	126	28.7827	28.6141	28.5816	29.165	28.9737	29.3314
	0.352523	0.725833	AT1G30580.1	AT1G30580.1	220	Color2 [DarkGray]	1	4					-1	8	8	8	27.4	27.4	27.4	44.471	0	29.622	221680000	25	26	24.1548	23.8142	23.8896	24.0304	21.5289	24.1218
	0.394349	0.566078	AT1G30680.1	AT1G30680.1	222	Color2 [DarkGray]	1	4					-1	10	10	10	16.5	16.5	16.5	80.402	0	44.742	148160000	37	19	23.7065	23.3996	23.8754	23.5929	21.9188	23.7716
	0.11401	0.265924	AT1G32380.2;AT1G32380.1	AT1G32380.2;AT1G32380.1	229	Color2 [DarkGray]	1	4					-1	8	8	2	37.7	37.7	12.3	31.584	0	33.25	158330000	14	17	22.3585	23.876	24.0079	23.2581	21.9528	24.2336
	0.570183	-0.321607	AT1G32500.1	AT1G32500.1	230	Color2 [DarkGray]	1	4					-1	9	9	9	21.3	21.3	21.3	52.824	0	33.005	208240000	21	27	23.6049	23.2624	23.6767	23.5009	23.7686	24.2393
	1.32178	0.899014	AT1G32580.1	AT1G32580.1	231	Color2 [DarkGray]	1	4					-1	4	4	4	24.9	24.9	24.9	26.024	0	24.282	119440000	13	17	23.8601	24.0483	23.9859	23.6776	22.8793	22.6404
	1.00476	0.488288	AT1G33140.1;AT1G33120.1	AT1G33140.1;AT1G33120.1	232	Color2 [DarkGray]	1	4					-1	15	15	10	66.5	66.5	52.6	22.017	0	115.34	3338500000	10	68	27.1813	27.2742	27.6953	27.0737	27.045	26.5673
	0.493327	0.128568	AT1G33780.1	AT1G33780.1	235	Color2 [DarkGray]	1	4					-1	5	5	5	20.9	20.9	20.9	36.392	0	15.964	159590000	15	22	24.1578	23.8026	23.9736	23.8114	23.9465	23.7904
	0.201296	-0.142412	AT1G34220.2;AT1G34220.1	AT1G34220.2;AT1G34220.1	236	Color2 [DarkGray]	1	4					-1	34	34	34	55.7	55.7	55.7	68.958	0	323.31	49159000000	32	325	30.1588	29.9557	29.9422	30.1576	29.7068	30.6196
	0.229561	0.577325	AT1G34430.1	AT1G34430.1	238	Color2 [DarkGray]	1	4					-1	12	10	10	37.4	32	32	48.306	0	52.99	362790000	23	38	24.5631	24.5102	24.3865	24.5979	21.9683	25.1617
	0.342879	1.05392	AT1G35460.1;AT1G35460.2;AT5G33210.1	AT1G35460.1;AT1G35460.2	240	Color2 [DarkGray]	1	4					-1	10	9	7	49	49	39	28.526	0	77.022	326550000	11	23	24.4834	24.4704	25.1016	24.6211	21.1383	25.1343
	0.121524	-0.193478	AT1G35680.1	AT1G35680.1	244	Color2 [DarkGray]	1	4					-1	2	2	2	6.8	6.8	6.8	24.038	0.00056786	2.8834	27300000	13	9	22.7741	20.9998	22.181	22.1354	22.6428	21.7572
	0.352055	0.509295	AT1G35720.1	AT1G35720.1	245	Color2 [DarkGray]	1	4					-1	3	3	3	13.9	13.9	13.9	36.203	0	10.701	29158000	21	8	21.0236	22.7694	22.0076	22.0426	21.2913	20.9387
	0.0147573	0.0174834	AT1G36160.2;AT1G36160.1	AT1G36160.2;AT1G36160.1	247	Color2 [DarkGray]	1	4					-1	119	77	77	63.4	43.6	43.6	251.38	0	323.31	19339000000	123	469	27.9476	27.748	27.997	27.4061	28.6423	27.5918
	0.0435909	-0.065918	AT1G36180.1;AT1G36180.2;AT1G36180.3	AT1G36180.1	248	Color2 [DarkGray]	1	4					-1	130	130	88	64.6	64.6	45.4	262.73	0	323.31	52087000000	125	866	28.6788	28.453	28.7246	28.0913	29.6979	28.2649
	1.16541	0.910797	AT1G37130.1	AT1G37130.1	251	Color2 [DarkGray]	1	4					-1	9	9	9	12.4	12.4	12.4	102.84	0	19.784	97122000	46	15	23.1083	23.8444	23.6652	23.1816	22.1836	22.5204
	0.336103	0.142925	AT1G41880.1;AT1G41880.2;AT3G55750.1	AT1G41880.1;AT1G41880.2;AT3G55750.1	253	Color2 [DarkGray]	1	4					-1	5	5	2	54.1	54.1	28.8	12.799	0	36.378	307460000	5	26	24.8103	24.856	25.0029	24.6033	25.0772	24.56
	0.0767001	0.0970821	AT1G42440.1	AT1G42440.1	255	Color2 [DarkGray]	1	4					-1	8	8	8	12.1	12.1	12.1	89.455	0	32.408	53746000	38	14	21.6825	22.7615	22.6019	22.6794	21.6933	22.3819
	0.0716559	-0.0448176	AT1G42970.1	AT1G42970.1	257	Color2 [DarkGray]	1	4					-1	9	9	5	24.6	24.6	14.8	47.659	0	34.012	308800000	28	32	24.3474	24.5371	24.6055	24.3255	24.3477	24.9514
	0.156762	0.17167	AT1G43170.9;AT1G43170.8;AT1G43170.7;AT1G43170.6;AT1G43170.5;AT1G43170.3;AT1G43170.2;AT1G43170.1;AT1G43170.4;AT1G61580.1	AT1G43170.9;AT1G43170.8;AT1G43170.7;AT1G43170.6;AT1G43170.5;AT1G43170.3;AT1G43170.2;AT1G43170.1;AT1G43170.4	259	Color2 [DarkGray]	1	4					-1	25	25	25	48.3	48.3	48.3	44.559	0	143.59	8457000000	25	150	27.3867	27.4522	27.2887	27.4759	26.4032	27.7335
	0.937753	1.05052	AT1G43190.3;AT1G43190.2;AT1G43190.1	AT1G43190.3;AT1G43190.2;AT1G43190.1	260	Color2 [DarkGray]	1	4					-1	6	6	6	22.3	22.3	22.3	48.02	0	34.795	77231000	19	13	22.9519	22.9302	23.1418	22.9523	21.7196	21.2004
	0.136363	-0.479106	AT1G43700.1	AT1G43700.1	263	Color2 [DarkGray]	1	4					-1	10	10	10	35.2	35.2	35.2	37.791	0	40.154	127200000	15	20	23.3709	20.9195	23.2799	24.0373	20.965	24.0053
	1.09132	0.620649	AT1G43800.1	AT1G43800.1	264	Color2 [DarkGray]	1	4					-1	11	10	10	36.6	34.5	34.5	44.155	0	46.527	540880000	22	43	25.2804	25.3217	25.2634	24.9449	24.9243	24.1343
	0.238889	0.268337	AT1G43850.2;AT1G43850.1	AT1G43850.2;AT1G43850.1	265	Color2 [DarkGray]	1	4					-1	15	15	15	25.4	25.4	25.4	96.231	0	78.86	312960000	30	44	23.7915	23.7297	23.8078	23.5768	22.7108	24.2365
	0.276826	0.209087	AT1G48630.1	AT1G48630.1	278	Color2 [DarkGray]	1	4					-1	17	4	4	49.1	15	15	35.8	0	32.47	257090000	20	16	24.6118	24.5109	24.7195	24.4519	23.8681	24.895
	0.581912	0.23955	AT1G48830.2;AT1G48830.1	AT1G48830.2;AT1G48830.1	279	Color2 [DarkGray]	1	4					-1	8	8	8	48.7	48.7	48.7	21.922	0	55.477	455660000	8	28	25.1294	24.8763	25.1423	24.8459	25.0702	24.5131
	0.364429	-0.286122	AT1G48920.1;AT3G18610.2;AT3G18610.3;AT3G18610.1	AT1G48920.1	283	Color2 [DarkGray]	1	4					-1	20	20	20	35.2	35.2	35.2	58.773	0	73.986	1814900000	31	89	25.5107	25.64	25.4959	25.9623	25.2199	26.3227
	0.442497	-0.238852	AT3G18780.3;AT3G18780.2;AT1G49240.1;AT3G18780.1	AT3G18780.3;AT3G18780.2;AT1G49240.1;AT3G18780.1	286	Color2 [DarkGray]	1	4					-1	20	7	4	54.4	27.6	20.4	41.876	0	60.53	358050000	21	27	24.355	24.334	24.0357	24.5988	24.0766	24.7658
	0.300207	-0.174042	AT1G49600.1;AT1G49600.3;AT1G49600.2	AT1G49600.1;AT1G49600.3;AT1G49600.2	288	Color2 [DarkGray]	1	4					-1	16	14	12	46.5	42.9	40.4	48.483	0	323.31	43261000000	13	182	30.9437	30.8192	30.7091	30.6222	31.402	30.9699
	0.0969221	-0.0643152	AT1G49760.2;AT1G49760.1	AT1G49760.2;AT1G49760.1	289	Color2 [DarkGray]	1	4					-1	29	25	24	54.8	52.5	48.9	72.779	0	208.29	2816200000	31	91	26.51	26.3337	26.6006	26.5833	26.1399	26.914
	0.759087	-0.36853	AT1G50200.1;AT1G50200.2	AT1G50200.1;AT1G50200.2	291	Color2 [DarkGray]	1	4					-1	25	25	25	28.5	28.5	28.5	110.49	0	83.537	363820000	54	55	23.7985	23.57	23.8722	24.0591	23.7938	24.4933
	0.116377	-0.209075	AT1G50480.1;AT2G12280.1	AT1G50480.1	294	Color2 [DarkGray]	1	4					-1	11	11	11	23.3	23.3	23.3	67.801	0	57.034	188250000	28	33	22.9381	23.2605	22.453	23.5505	21.8855	23.8429
	1.25241	-0.3836	AT1G51140.1	AT1G51140.1	303	Color2 [DarkGray]	1	4					-1	13	13	13	48.5	48.5	48.5	41.716	0	122.74	960930000	18	52	25.7008	25.6936	25.8226	26.1849	25.8594	26.3235
	0.176594	0.291297	AT1G51380.1;AT1G51380.2;AT1G51380.4;AT1G51380.3	AT1G51380.1;AT1G51380.2;AT1G51380.4;AT1G51380.3	304	Color2 [DarkGray]	1	4					-1	8	6	6	21.9	19.9	19.9	44.357	0	19.61	110600000	27	13	23.4328	23.4051	23.3825	23.6238	21.8708	23.8519
	0.326641	0.972253	AT1G51560.1	AT1G51560.1	307	Color2 [DarkGray]	1	4					-1	9	9	8	34.4	34.4	31.6	43.582	0	52.086	309880000	18	23	25.0222	24.1702	24.3128	24.9178	21.1506	24.5201
	0.711091	-0.177303	AT1G51580.1	AT1G51580.1	308	Color2 [DarkGray]	1	4					-1	10	10	10	18.4	18.4	18.4	67.114	0	33.652	236200000	34	33	23.4041	23.7553	23.6413	23.8596	23.7784	23.6947
	0.586832	-0.240096	AT1G51600.2;AT1G51600.1	AT1G51600.2;AT1G51600.1	309	Color2 [DarkGray]	1	4					-1	10	10	8	45	45	41.4	33.129	0	120.14	6490800000	10	68	28.387	28.3011	28.4363	28.2991	28.6294	28.9162
	0.232884	-0.239833	AT1G51660.1;AT3G21220.2;AT3G21220.1	AT1G51660.1	310	Color2 [DarkGray]	1	4					-1	5	5	5	13.4	13.4	13.4	40.116	0	9.2811	49835000	22	13	21.6798	21.6287	22.539	22.4063	21.6406	22.5201
	0.266553	0.401854	AT1G51690.4;AT1G51690.1;AT1G51690.2;AT1G51690.5;AT1G51690.3	AT1G51690.4;AT1G51690.1;AT1G51690.2;AT1G51690.5;AT1G51690.3	311	Color2 [DarkGray]	1	4					-1	10	10	9	28.5	28.5	26.9	56.934	0	52.782	199000000	25	30	23.5915	23.7476	23.8241	23.7922	22.1302	24.0352
	0.210354	-0.135367	AT1G51710.1;AT1G51710.2;AT3G21280.2;AT3G21280.1	AT1G51710.1;AT1G51710.2	312	Color2 [DarkGray]	1	4					-1	13	13	13	30.7	30.7	30.7	53.695	0	45.318	317950000	23	34	23.6643	23.8653	23.9087	24.3647	23.5413	23.9383
	0.261112	0.634438	AT1G51980.1;AT1G51980.2;AT3G16480.1	AT1G51980.1;AT1G51980.2	314	Color2 [DarkGray]	1	4					-1	14	14	14	40.2	40.2	40.2	54.401	0	76.856	338100000	24	40	23.8595	23.8068	23.9189	23.9558	21.3099	24.4161
	0.806874	-0.615079	AT3G16080.1;AT1G52300.1;AT1G15250.2;AT1G15250.1;AT3G16080.2	AT3G16080.1;AT1G52300.1;AT1G15250.2;AT1G15250.1;AT3G16080.2	315	Color2 [DarkGray]	1	4					-1	4	4	4	37.9	37.9	37.9	10.771	0	10.579	331940000	4	16	25.7507	25.6449	24.6731	25.8692	25.9113	26.1334
	0.131117	-0.0727062	AT1G52360.3;AT1G52360.4;AT1G52360.1;AT1G52360.2	AT1G52360.3;AT1G52360.4;AT1G52360.1;AT1G52360.2	316	Color2 [DarkGray]	1	4					-1	19	19	6	23.5	23.5	8.1	104.22	0	85.648	668810000	48	65	24.8641	25.0022	25.0674	24.9931	24.7455	25.4132
	0.713819	-0.286811	AT1G52670.1	AT1G52670.1	319	Color2 [DarkGray]	1	4					-1	20	20	19	77	77	73.4	29.573	0	323.31	176980000000	12	561	32.1667	31.9917	31.7593	31.9782	32.4079	32.3921
	0.363051	-0.110477	AT1G52730.2;AT1G52730.1;AT1G52730.3;AT3G15610.1;AT1G15470.2;AT1G15470.1	AT1G52730.2;AT1G52730.1;AT1G52730.3;AT3G15610.1	320	Color2 [DarkGray]	1	4					-1	23	23	23	74.3	74.3	74.3	37.754	0	154.69	4571800000	23	104	27.1205	27.0051	26.9447	27.1417	26.9291	27.3309
	0.416793	-0.512454	AT1G52760.1	AT1G52760.1	322	Color2 [DarkGray]	1	4					-1	3	3	3	12.3	12.3	12.3	36.975	0	4.9164	32923000	11	9	21.9891	22.3833	21.264	22.8495	21.5772	22.7471
	0.108989	-0.120696	AT1G53240.1;AT3G15020.1;AT3G15020.2	AT1G53240.1;AT3G15020.1	325	Color2 [DarkGray]	1	4					-1	13	13	12	62.2	62.2	58.9	35.804	0	122.66	2019100000	15	72	26.5767	26.6562	26.141	26.8536	25.852	27.0303
	0.291639	0.542138	AT1G53310.3;AT1G53310.2;AT1G53310.1;AT3G14940.2;AT3G14940.1	AT1G53310.3;AT1G53310.2;AT1G53310.1;AT3G14940.2;AT3G14940.1	327	Color2 [DarkGray]	1	4					-1	17	17	13	22.1	22.1	17.1	110.28	0	57.787	223870000	59	40	23.1765	23.5252	23.5105	23.6859	21.3779	23.5219
	0.0100461	-0.00811895	AT1G53750.1;AT1G53780.3;AT1G53780.4;AT1G53780.1;AT1G53780.2	AT1G53750.1	329	Color2 [DarkGray]	1	4					-1	11	11	11	31.9	31.9	31.9	47.803	0	59.966	276000000	28	26	24.0951	24.5262	24.762	24.489	24.1463	24.7723
	2.18906	0.884786	AT1G53850.2;AT1G53850.1	AT1G53850.2;AT1G53850.1	330	Color2 [DarkGray]	1	4					-1	4	4	1	23.6	23.6	6.8	25.947	0	19.883	62742000	14	16	22.9567	22.8458	22.7777	22.2956	21.7775	21.8529
	0.756857	1.23982	AT1G54080.1;AT1G54080.2;AT3G14100.1;AT1G17370.2;AT1G17370.1	AT1G54080.1;AT1G54080.2;AT3G14100.1	332	Color2 [DarkGray]	1	4					-1	5	5	5	13.6	13.6	13.6	47.233	0	39.981	117520000	12	15	23.6278	23.6665	23.8498	23.8561	22.2906	21.2779
	0.426215	-0.304784	AT1G54140.1	AT1G54140.1	334	Color2 [DarkGray]	1	4					-1	7	7	7	43.2	43.2	43.2	20.597	0	26.25	185480000	9	26	23.2745	23.7359	23.7193	23.6018	24.412	23.6303
	1.51869	-0.273026	AT1G54170.1	AT1G54170.1	335	Color2 [DarkGray]	1	4					-1	16	16	13	30.3	30.3	26.4	65.389	0	93.152	968630000	33	69	25.182	25.2464	25.3528	25.6574	25.4298	25.5131
	0.790682	0.127531	AT1G54270.1;AT1G54270.2	AT1G54270.1;AT1G54270.2	336	Color2 [DarkGray]	1	4					-1	27	27	7	79.1	79.1	21.8	46.762	0	215.62	6724300000	23	165	27.7881	27.864	27.8862	27.7865	27.7872	27.582
	0.184224	-0.169207	AT5G54760.4;AT5G54760.3;AT5G54760.2;AT5G54760.1;AT4G27130.1;AT1G54290.1;AT5G54940.3;AT5G54940.2;AT5G54940.1	AT5G54760.4;AT5G54760.3;AT5G54760.2;AT5G54760.1;AT4G27130.1;AT1G54290.1;AT5G54940.3;AT5G54940.2;AT5G54940.1	337	Color2 [DarkGray]	1	4					-1	2	2	2	19.5	19.5	19.5	12.62	0	4.9925	24188000	4	8	21.7751	22.1008	21.7519	21.6174	22.6981	21.8199
	0.0111011	-0.0550442	AT1G54360.3;AT1G54360.1;AT1G54360.2;AT1G54360.5	AT1G54360.3;AT1G54360.1;AT1G54360.2	338	Color2 [DarkGray]	1	4					-1	7	3	3	15.5	4.4	4.4	52.015	0	12.771	168880000	10	17	25.0792	24.5511	21.5647	25.0779	24.9249	21.3574
	0.235651	0.152662	AT1G54360.4;AT1G54360.6	AT1G54360.4;AT1G54360.6	339	Color2 [DarkGray]	1	4					-1	21	21	17	51.1	51.1	40.7	59.135	0	150.66	1765000000	22	89	25.8458	25.7307	25.8526	26.0506	25.1886	25.7319
	0.167913	-0.129876	AT1G55490.5;AT1G55490.4;AT1G55490.3;AT1G55490.2;AT1G55490.1	AT1G55490.5;AT1G55490.4;AT1G55490.3;AT1G55490.2;AT1G55490.1	342	Color2 [DarkGray]	1	4					-1	33	6	5	59.8	12	12	63.808	0	19.221	119810000	36	22	22.9999	23.4628	23.3344	23.6076	22.8837	23.6954
	0.0168741	0.0222244	AT1G55820.1	AT1G55820.1	345	Color2 [DarkGray]	1	4					-1	6	6	6	13	13	13	61.876	0	28.249	93249000	19	18	22.3928	22.704	22.8136	22.9584	21.7816	23.1037
	0.220217	0.15078	AT1G55890.1	AT1G55890.1	346	Color2 [DarkGray]	1	4					-1	8	8	8	23.4	23.4	23.4	44.994	0	28.632	98107000	25	21	23.4685	22.9201	23.1787	22.9344	23.4512	22.7293
	0.643736	0.963304	AT1G55900.2;AT1G55900.1	AT1G55900.2;AT1G55900.1	347	Color2 [DarkGray]	1	4					-1	7	7	7	27.3	27.3	27.3	41.89	0	42.446	167050000	15	21	22.5998	24.0825	24.0407	22.0159	22.2829	23.5342
	0.687231	-0.122917	AT1G56070.3;AT1G56070.2;AT1G56070.1;AT3G12915.2;AT3G12915.1	AT1G56070.3;AT1G56070.2;AT1G56070.1	348	Color2 [DarkGray]	1	4					-1	52	52	52	61.3	61.3	61.3	93.89	0	323.31	13012000000	44	257	28.7774	28.8076	28.7897	28.8017	28.8703	29.0714
	0.586717	-0.427454	AT1G56110.1;AT3G12860.1	AT1G56110.1	349	Color2 [DarkGray]	1	4					-1	11	11	11	29.3	29.3	29.3	58.673	0	71.412	173370000	25	26	23.5727	23.3896	23.2316	24.0242	23.2176	24.2344
	0.00292502	0.00487582	AT1G56340.1;AT1G56340.2	AT1G56340.1;AT1G56340.2	352	Color2 [DarkGray]	1	4					-1	15	15	8	42.1	42.1	27.8	48.527	0	57.024	393670000	27	39	24.2718	24.7109	24.1081	24.4414	23.4297	25.2051
	0.549973	0.927339	AT1G56450.1	AT1G56450.1	353	Color2 [DarkGray]	1	4					-1	3	3	3	21.1	21.1	21.1	27.651	0	27.013	92029000	12	11	23.3035	23.4157	23.3762	23.8917	21.9973	21.4244
	0.599549	0.241126	AT1G57860.1;AT1G57660.1	AT1G57860.1;AT1G57660.1	354	Color2 [DarkGray]	1	4					-1	11	11	1	47	47	5.5	18.709	0	93.232	1578600000	8	45	26.6013	26.6118	26.2243	26.4399	26.2708	26.0032
	0.240783	-0.182974	AT1G57720.2;AT1G57720.1	AT1G57720.2;AT1G57720.1	355	Color2 [DarkGray]	1	4					-1	12	6	6	35.8	20.1	20.1	46.4	0	52.202	570720000	18	29	24.9797	24.8429	24.6976	25.2679	24.4485	25.3528
	0.470488	0.438129	AT1G59359.1;AT1G58983.1;AT1G58684.1;AT1G58380.1	AT1G59359.1;AT1G58983.1;AT1G58684.1;AT1G58380.1	358	Color2 [DarkGray]	1	4					-1	15	4	4	48.9	16.9	16.9	30.771	0	28.45	1087300000	16	37	26.2876	26.5229	26.2349	26.2117	25.13	26.3892
	0.408739	0.546234	AT1G60780.1;AT1G10730.1	AT1G60780.1;AT1G10730.1	370	Color2 [DarkGray]	1	4					-1	6	6	6	15.9	15.9	15.9	49.032	0	16.097	72232000	21	15	23.3893	21.8843	23.6396	22.6553	22.1535	22.4658
	0.413753	-0.451635	AT1G61730.1;AT4G00390.1	AT1G61730.1	372	Color2 [DarkGray]	1	4					-1	8	8	8	21.5	21.5	21.5	40.879	0	21.271	74339000	15	23	22.8357	22.8871	21.8893	23.4182	22.3355	23.2134
	0.870965	1.17818	AT1G61870.1	AT1G61870.1	373	Color2 [DarkGray]	1	4					-1	6	6	6	15.9	15.9	15.9	45.757	0	12.782	105730000	22	15	23.6102	23.3489	23.5273	23.4008	21.2364	22.3147
	0.221686	0.44987	AT1G61990.2;AT1G61990.1	AT1G61990.2;AT1G61990.1	375	Color2 [DarkGray]	1	4					-1	7	7	7	23.7	23.7	23.7	46.248	0	16.614	67048000	25	14	21.5532	22.7133	22.9549	23.0487	20.7596	22.0635
	0.863466	1.60248	AT1G62380.1;AT1G05010.1	AT1G62380.1	379	Color2 [DarkGray]	1	4					-1	7	7	6	30	30	27.5	36.183	0	38.435	330380000	13	26	24.7037	24.9651	24.5599	23.935	21.4319	24.0543
	0.209111	0.166702	AT1G62390.1	AT1G62390.1	380	Color2 [DarkGray]	1	4					-1	38	38	38	59.1	59.1	59.1	82.707	0	269.53	3753100000	39	161	26.8904	26.7768	26.8024	26.8379	26.0582	27.0735
	0.461462	0.909172	AT1G63660.1;AT1G63660.2	AT1G63660.1;AT1G63660.2	390	Color2 [DarkGray]	1	4					-1	9	9	9	24.3	24.3	24.3	59.314	0	65.79	132640000	32	18	23.6651	23.7674	22.2742	23.7297	21.6256	21.6238
	0.0578113	-0.157225	AT1G63940.4;AT1G63940.1;AT1G63940.2;AT1G63940.3	AT1G63940.4;AT1G63940.1;AT1G63940.2;AT1G63940.3	393	Color2 [DarkGray]	1	4					-1	7	7	7	23	23	23	52.115	0	29.284	116860000	30	14	22.6854	23.7777	21.3778	23.2812	21.508	23.5232
	1.30753	1.4245	AT1G64190.1	AT1G64190.1	395	Color2 [DarkGray]	1	4					-1	7	7	1	19.7	19.7	3.1	53.377	0	29.247	143130000	23	19	23.5918	23.6734	23.2249	23.0473	21.6907	21.4786
	0.103298	0.0774396	AT1G64520.1	AT1G64520.1	397	Color2 [DarkGray]	1	4					-1	10	10	10	46.1	46.1	46.1	30.706	0	43.558	145710000	15	21	23.9465	23.2567	23.1349	23.4922	23.183	23.4306
	0.275202	0.538159	AT1G64550.1	AT1G64550.1	398	Color2 [DarkGray]	1	4					-1	9	9	9	18.7	18.7	18.7	79.643	0	45.085	166830000	33	24	24.0152	23.761	23.9616	24.3899	21.8386	23.8949
	1.1515	1.04262	AT1G64880.1	AT1G64880.1	401	Color2 [DarkGray]	1	4					-1	4	4	4	7.4	7.4	7.4	60.235	0	6.3841	54034000	25	13	22.6933	23.0776	22.855	22.6003	21.1945	21.7031
	1.46835	0.526151	AT1G65260.2;AT1G65260.1	AT1G65260.2;AT1G65260.1	403	Color2 [DarkGray]	1	4					-1	15	15	15	54.1	54.1	54.1	28.912	0	246.21	2513400000	16	85	27.2204	27.5015	27.0096	26.7803	26.5484	26.8243
	0.768263	2.2864	AT1G65800.2;AT1G65800.1	AT1G65800.2;AT1G65800.1	405	Color2 [DarkGray]	1	4					-1	1	1	1	1.6	1.6	1.6	69.054	0.0020736	2.0288	139690000	36	9	24.2608	25.1345	24.5507	25.0285	20.7087	21.3496
	0.309751	0.874322	AT1G65930.1;AT1G54340.1;AT1G54340.2	AT1G65930.1	406	Color2 [DarkGray]	1	4					-1	15	15	14	39.8	39.8	37.8	45.746	0	60.189	283670000	25	41	24.0127	24.093	23.8547	24.0793	20.8224	24.4357
	0.197201	0.214481	AT1G65980.1;AT1G65980.2	AT1G65980.1;AT1G65980.2	407	Color2 [DarkGray]	1	4					-1	5	5	5	43.2	43.2	43.2	17.428	0	82.332	408270000	6	17	25.2848	25.4146	25.0856	25.6406	25.2331	24.2678
	0.233979	-0.722425	AT1G66240.2;AT1G66240.1	AT1G66240.2;AT1G66240.1	408	Color2 [DarkGray]	1	4					-1	2	2	2	40.9	40.9	40.9	7.0731	0	5.6453	81951000	4	9	21.0857	23.7604	21.675	23.5946	21.1075	23.9863
	0.443271	1.58846	AT1G66580.1	AT1G66580.1	409	Color2 [DarkGray]	1	4					-1	12	12	4	48.4	48.4	16.3	24.929	0	35.968	801450000	11	37	25.9749	26.0617	25.9754	25.8521	21.3401	26.0545
	0.00649512	-0.0155017	AT1G67090.1;AT1G67090.2	AT1G67090.1;AT1G67090.2	410	Color2 [DarkGray]	1	4					-1	4	4	3	27.8	27.8	20	20.216	0	21.48	71266000	12	13	23.0154	21.4899	22.6465	23.0216	21.1312	23.0454
	0.193792	0.299714	AT1G67120.1;AT1G67120.2	AT1G67120.1;AT1G67120.2	411	Color2 [DarkGray]	1	4					-1	32	32	32	7.1	7.1	7.1	611.15	0	72.918	157670000	275	54	22.6217	22.5436	23.0665	22.754	21.3382	23.2405
	0.461625	-0.193443	AT1G67230.1	AT1G67230.1	412	Color2 [DarkGray]	1	4					-1	64	64	64	47.1	47.1	47.1	129.09	0	323.31	6238900000	54	252	26.398	26.3315	26.5446	26.4084	26.4919	26.9542
	0.1956	0.0986919	AT1G67430.1;AT1G67430.2	AT1G67430.1;AT1G67430.2	414	Color2 [DarkGray]	1	4					-1	8	8	1	48	48	5.7	19.854	0	25.535	1189100000	10	40	26.6402	26.9074	26.6871	26.7955	26.8465	26.2966
	0.64951	0.829443	AT1G69010.1	AT1G69010.1	419	Color2 [DarkGray]	1	4					-1	7	7	7	30.2	30.2	30.2	34.487	0	36.568	68726000	13	17	22.6341	23.1552	22.5292	23.0072	21.215	21.608
	0.607303	0.825419	AT1G70770.2;AT1G70770.1;AT1G23170.2;AT1G23170.1	AT1G70770.2;AT1G70770.1	428	Color2 [DarkGray]	1	4					-1	11	11	11	23.6	23.6	23.6	66.864	0	45.311	135400000	32	20	23.4147	23.3384	23.827	22.9907	21.5656	23.5475
	0.630089	0.244205	AT1G71260.1	AT1G71260.1	432	Color2 [DarkGray]	1	4					-1	11	11	11	61.8	61.8	61.8	26.295	0	68.192	14436000000	15	112	29.5174	29.3901	29.2665	28.9814	28.9953	29.4647
	1.33553	0.62487	AT1G71310.1;AT1G71310.2;AT1G71310.3	AT1G71310.1;AT1G71310.2;AT1G71310.3	434	Color2 [DarkGray]	1	4					-1	6	6	6	39.8	39.8	39.8	19.484	0	46.203	376860000	15	26	24.9424	24.6754	24.4083	24.1343	23.7494	24.2677
	0.84573	0.223935	AT1G71770.2;AT1G71770.1	AT1G71770.2;AT1G71770.1	436	Color2 [DarkGray]	1	4					-1	42	42	36	65.8	65.8	60.3	74.422	0	323.31	12977000000	33	224	29.1389	29.1113	29.191	28.8854	28.7355	29.1485
	0.246116	0.106406	AT1G72370.2;AT1G72370.1;AT3G04770.2;AT3G04770.1	AT1G72370.2;AT1G72370.1	440	Color2 [DarkGray]	1	4					-1	13	13	13	49.3	49.3	49.3	31.981	0	120.92	2574100000	14	70	27.2281	27.4788	27.0818	27.3277	27.2303	26.9116
	0.28238	-0.177687	AT1G72390.2;AT1G72390.1	AT1G72390.2;AT1G72390.1	441	Color2 [DarkGray]	1	4					-1	44	44	44	54.3	54.3	54.3	143.31	0	323.31	3226400000	53	177	25.9831	25.9294	26.0098	26.144	25.7186	26.5928
	1.0908	1.75455	AT1G73030.1;AT1G17730.1	AT1G73030.1	445	Color2 [DarkGray]	1	4					-1	5	5	5	23.6	23.6	23.6	22.691	0	19.942	97926000	9	15	23.3986	23.6327	23.3749	23.2176	20.944	20.981
	0.0708382	0.275767	AT1G73230.1	AT1G73230.1	447	Color2 [DarkGray]	1	4					-1	4	4	2	33.3	33.3	22.4	18.004	0	8.3833	143710000	6	14	21.5263	24.6348	24.495	24.2794	21.4583	24.0911
	0.0755473	0.0817019	AT1G74040.1;AT1G74040.2;AT1G74040.3	AT1G74040.1;AT1G74040.2;AT1G74040.3	451	Color2 [DarkGray]	1	4					-1	8	8	2	19.8	19.8	7.9	68.135	0	25.98	58855000	36	17	21.4715	22.2142	22.5698	22.2506	22.1513	21.6086
	0.593123	0.242614	AT1G74060.1;AT1G74050.1	AT1G74060.1;AT1G74050.1	452	Color2 [DarkGray]	1	4					-1	18	18	8	57.9	57.9	29.6	26.008	0	77.115	2812900000	11	96	26.9403	27.0178	26.906	26.5848	26.4844	27.067
	1.17202	1.7972	AT1G74230.1	AT1G74230.1	453	Color2 [DarkGray]	1	4					-1	3	3	3	10.7	10.7	10.7	28.728	0	12.925	139800000	6	13	23.8325	23.9702	23.7382	21.0446	23.4401	21.6645
	0.16441	0.282998	AT1G74260.1	AT1G74260.1	454	Color2 [DarkGray]	1	4					-1	9	9	9	8.7	8.7	8.7	153.95	0	28.025	98972000	74	16	22.097	22.7154	23.0918	21.2615	22.5565	23.2372
	0.12582	0.0848497	AT1G74470.1	AT1G74470.1	455	Color2 [DarkGray]	1	4					-1	7	7	7	20.1	20.1	20.1	51.837	0	27.455	206190000	25	25	24.0418	23.7688	23.5863	23.4549	23.5608	24.1267
	0.0243069	-0.0200615	AT1G75950.1;AT4G34470.1;AT4G34210.1	AT1G75950.1	462	Color2 [DarkGray]	1	4					-1	5	5	3	39.4	39.4	26.2	17.857	0	24.012	160900000	7	22	23.6535	24.0474	24.0351	23.6258	23.7562	24.4142
	0.273785	-0.424999	AT1G76860.1;AT1G21190.1	AT1G76860.1;AT1G21190.1	468	Color2 [DarkGray]	1	4					-1	4	4	4	36.7	36.7	36.7	11.286	0	13.903	78561000	4	14	21.2957	23.013	23.2679	22.8214	23.0096	23.0206
	0.0635025	-0.0574226	AT1G77120.1	AT1G77120.1	469	Color2 [DarkGray]	1	4					-1	13	13	13	46.2	46.2	46.2	41.178	0	80.448	3057700000	20	86	26.7199	26.8728	26.5648	27.0456	26.1746	27.1096
	0.538446	0.699785	AT1G77940.1;AT1G36240.1	AT1G77940.1;AT1G36240.1	474	Color2 [DarkGray]	1	4					-1	4	1	1	42	17	17	12.29	0	8.7519	50967000	5	6	23.4359	22.9347	22.18	21.5363	21.9059	23.0092
	0.235173	0.190904	AT1G78380.1;AT1G17170.1	AT1G78380.1	478	Color2 [DarkGray]	1	4					-1	9	9	9	38.4	38.4	38.4	25.65	0	31.921	565600000	14	31	25.6159	25.9979	25.8345	26.2011	25.1961	25.4783
	0.122848	-0.0800107	AT1G78900.2;AT1G78900.1	AT1G78900.2;AT1G78900.1	480	Color2 [DarkGray]	1	4					-1	15	15	15	31.3	31.3	31.3	68.812	0	72.022	281350000	38	37	23.8996	23.817	23.944	24.1111	23.5072	24.2823
	0.236043	0.071804	AT1G79090.3;AT1G79090.2;AT1G79090.1	AT1G79090.3;AT1G79090.2;AT1G79090.1	483	Color2 [DarkGray]	1	4					-1	28	28	28	46.7	46.7	46.7	88.839	0	178.97	3156200000	38	122	26.268	26.2406	26.4901	26.3071	26.0877	26.3885
	0.793105	-0.316683	AT1G79230.1;AT1G79230.3;AT1G79230.2	AT1G79230.1;AT1G79230.3;AT1G79230.2	484	Color2 [DarkGray]	1	4					-1	7	7	7	23	23	23	41.893	0	40.048	219590000	25	24	23.858	23.9825	23.7118	24.0135	23.9878	24.5011
	0.259325	-0.624757	AT1G79340.1;AT1G79330.1	AT1G79340.1	486	Color2 [DarkGray]	1	4					-1	6	6	6	17.7	17.7	17.7	45.483	0	15.411	83492000	22	13	22.1612	23.7212	22.1082	24.3813	21.7294	23.7542
	0.0261586	-0.0723387	AT1G79440.1	AT1G79440.1	487	Color2 [DarkGray]	1	4					-1	9	9	9	24.2	24.2	24.2	56.558	0	34.296	108730000	31	18	22.6304	22.6149	22.0088	23.1404	20.7041	23.6266
	0.813746	-0.272349	AT1G79530.1;AT1G16300.1	AT1G79530.1;AT1G16300.1	489	Color2 [DarkGray]	1	4					-1	17	15	15	50.9	48.3	48.3	44.83	0	143.17	908330000	24	60	24.8593	24.9671	24.8248	25.0844	24.9417	25.4422
	0.0818035	-0.090449	AT1G79550.2;AT1G79550.1	AT1G79550.2;AT1G79550.1	490	Color2 [DarkGray]	1	4					-1	23	23	18	73.8	73.8	60.1	42.131	0	124.77	2531100000	25	105	25.8019	26.1746	25.591	26.1282	25.2671	26.4435
	1.01185	-0.370496	AT1G79570.2;AT1G79570.1;AT1G79570.5;AT1G79570.4;AT1G79570.3;AT1G14000.1;AT4G23050.1;AT4G23050.2	AT1G79570.2;AT1G79570.1;AT1G79570.5;AT1G79570.4;AT1G79570.3	491	Color2 [DarkGray]	1	4					-1	69	69	52	64.7	64.7	53.2	137.24	0	323.31	35235000000	55	504	28.7882	28.7467	28.7089	28.9585	28.938	29.4588
	0.198355	0.525613	AT1G79920.4;AT1G79920.3;AT1G79920.2;AT1G79920.1	AT1G79920.4;AT1G79920.3;AT1G79920.2;AT1G79920.1	495	Color2 [DarkGray]	1	4					-1	28	5	5	52.6	16.4	16.4	81.775	0	106.15	278410000	36	20	24.5602	24.1008	24.0685	24.7586	21.7038	24.6902
	0.0302759	-0.0303828	AT1G79930.2;AT1G79930.1	AT1G79930.2;AT1G79930.1	496	Color2 [DarkGray]	1	4					-1	33	33	10	52.7	52.7	19	87.316	0	191.9	2615500000	44	115	25.5861	25.6396	25.7278	25.8431	25.0372	26.1644
	0.528823	0.955303	AT1G80070.1;AT4G38780.1	AT1G80070.1;AT4G38780.1	499	Color2 [DarkGray]	1	4					-1	33	33	33	19.4	19.4	19.4	275.42	0	99.989	378010000	123	62	24.5479	24.3567	24.3989	24.2797	21.8929	24.2649
	0.549	0.823869	AT1G80270.5;AT1G80270.4;AT1G80270.3;AT1G80270.2;AT1G80270.1	AT1G80270.5;AT1G80270.4;AT1G80270.3;AT1G80270.2;AT1G80270.1	500	Color2 [DarkGray]	1	4					-1	11	11	10	23	23	21.3	67.281	0	33.522	235130000	37	29	24.0124	23.8742	23.9844	23.7415	21.8093	23.8486
	0.14252	-0.141692	AT1G80410.1;AT1G80410.2	AT1G80410.1;AT1G80410.2	501	Color2 [DarkGray]	1	4					-1	4	4	4	5.6	5.6	5.6	102.15	0	10.574	28905000	52	10	21.8204	22.1652	21.9392	21.4436	22.2601	22.6461
	0.331062	0.577389	AT1G80480.1	AT1G80480.1	503	Color2 [DarkGray]	1	4					-1	6	6	4	17.1	17.1	11.5	49.487	0	27.797	186560000	21	21	23.9422	23.9128	24.0769	24.1403	21.967	24.0924
	0.0512262	0.0714264	AT1G80560.1;AT5G14200.3;AT5G14200.1;AT5G14200.2	AT1G80560.1;AT5G14200.3;AT5G14200.1	505	Color2 [DarkGray]	1	4					-1	5	5	2	22.2	22.2	8.9	43.37	0	30.11	44841000	20	14	22.3095	22.6249	22.3016	22.3853	23.1267	21.5098
	0.030193	-0.0512454	AT2G01140.1	AT2G01140.1	508	Color2 [DarkGray]	1	4					-1	16	16	14	50.6	50.6	46.3	42.327	0	78.575	740040000	21	58	24.631	25.04	24.7198	25.1234	23.7745	25.6466
	0.333698	-0.421668	AT2G01190.1	AT2G01190.1	509	Color2 [DarkGray]	1	4					-1	24	24	24	42.5	42.5	42.5	77.337	0	323.31	68790000000	22	252	30.7788	30.6284	30.7835	30.556	32.185	30.7146
	1.27449	0.275035	AT2G01250.1;AT2G01250.2	AT2G01250.1;AT2G01250.2	510	Color2 [DarkGray]	1	4					-1	16	16	8	57.4	57.4	36	28.171	0	75.106	1410000000	14	64	26.4706	26.3088	26.2774	26.0284	26.2366	25.9667
	0.301917	0.148261	AT2G01350.2;AT2G01350.4;AT2G01350.3;AT2G01350.1	AT2G01350.2;AT2G01350.4;AT2G01350.3;AT2G01350.1	511	Color2 [DarkGray]	1	4					-1	12	12	12	55.9	55.9	55.9	30.845	0	49.234	475480000	19	35	24.7083	24.3312	24.47	24.6868	24.214	24.164
	3.05867	1.17661	AT2G02160.1	AT2G02160.1	514	Color2 [DarkGray]	1	4					-1	8	8	8	15.2	15.2	15.2	75.831	0	16.162	59667000	33	11	23.0152	22.7544	22.9318	21.6131	21.9382	21.6203
	0.577161	-0.148162	AT2G02560.2;AT2G02560.1	AT2G02560.2;AT2G02560.1	517	Color2 [DarkGray]	1	4					-1	32	32	32	28.8	28.8	28.8	134.62	0	123.69	1356900000	68	118	25.3206	25.6398	25.4553	25.5686	25.5382	25.7533
	2.93942	0.712877	AT2G02740.1	AT2G02740.1	518	Color2 [DarkGray]	1	4					-1	13	13	11	52.6	52.6	45.1	29.728	0	142.62	5431400000	16	75	28.2787	28.0113	28.0412	27.4241	27.3731	27.3953
	1.16854	-0.394766	AT2G02790.3;AT2G02790.2;AT2G02790.1	AT2G02790.3;AT2G02790.2;AT2G02790.1	519	Color2 [DarkGray]	1	4					-1	7	7	7	15.6	15.6	15.6	65.266	0	46.798	213420000	27	28	23.2115	23.3827	23.3048	23.5999	23.4934	23.99
	1.10999	1.73321	AT2G03050.1;AT2G03050.2	AT2G03050.1;AT2G03050.2	520	Color2 [DarkGray]	1	4					-1	4	4	4	21.2	21.2	21.2	32.259	0	23.942	111870000	16	12	23.6184	23.3095	23.9419	23.3091	21.0955	21.2656
	0.0413345	0.0788148	AT2G03510.1	AT2G03510.1	524	Color2 [DarkGray]	1	4					-1	6	6	6	16.6	16.6	16.6	40.596	0	16.397	106530000	18	18	23.4125	23.0219	22.6412	23.1534	21.8021	23.8836
	0.385945	-0.161849	AT2G03820.1	AT2G03820.1	527	Color2 [DarkGray]	1	4					-1	10	10	10	22.1	22.1	22.1	59.293	0	26.53	167450000	28	28	23.093	23.2413	23.0913	23.1229	23.1459	23.6423
	2.26325	2.85388	AT2G03870.2;AT2G03870.1	AT2G03870.2;AT2G03870.1	528	Color2 [DarkGray]	1	4					-1	3	3	3	33.3	33.3	33.3	10.773	0	26.955	103680000	6	10	23.6941	24.1314	25.116	21.3924	20.9604	22.0271
	0.122255	0.136812	AT2G04030.2;AT2G04030.1	AT2G04030.2;AT2G04030.1	529	Color2 [DarkGray]	1	4					-1	34	34	30	56.5	56.5	51.5	88.255	0	319.28	2209600000	47	121	26.0212	26.1473	26.0242	26.2085	25.126	26.4477
	0.465137	0.301951	AT3G10610.1;AT2G05220.2;AT2G05220.1;AT5G04800.4;AT5G04800.3;AT5G04800.2;AT5G04800.1;AT2G04390.1	AT3G10610.1;AT2G05220.2;AT2G05220.1;AT5G04800.4;AT5G04800.3;AT5G04800.2;AT5G04800.1;AT2G04390.1	530	Color2 [DarkGray]	1	4					-1	9	9	9	37.1	37.1	37.1	16.036	0	23.454	1228300000	4	50	26.0618	26.4606	26.0527	26.3182	25.8865	25.4645
	0.333717	0.38534	AT2G04400.1	AT2G04400.1	531	Color2 [DarkGray]	1	4					-1	11	11	11	29.4	29.4	29.4	44.577	0	26.667	187140000	27	36	23.8943	23.9633	24.0297	24.1656	22.638	23.9277
	0.257089	-0.19846	AT2G05710.1	AT2G05710.1	535	Color2 [DarkGray]	1	4					-1	38	38	27	54.5	54.5	39.3	108.2	0	323.31	4842600000	50	171	26.5709	26.7777	26.2002	26.9144	26.2059	27.0238
	0.478496	0.859168	AT2G05830.1;AT2G05830.3;AT2G05830.2;AT2G05830.4	AT2G05830.1;AT2G05830.3;AT2G05830.2;AT2G05830.4	536	Color2 [DarkGray]	1	4					-1	11	11	11	39	39	39	39.612	0	74.831	273330000	24	30	24.1002	24.3615	23.822	23.8799	21.7136	24.1128
	0.39063	1.06813	AT2G05990.2;AT2G05990.1	AT2G05990.2;AT2G05990.1	539	Color2 [DarkGray]	1	4					-1	14	14	14	50.5	50.5	50.5	41.213	0	123.42	286310000	22	26	24.3896	24.5466	24.476	24.4902	21.099	24.6186
	1.25027	-0.352369	AT2G07698.1	AT2G07698.1	548	Color2 [DarkGray]	1	4					-1	23	23	22	33.7	33.7	32.8	85.932	0	194.77	2462000000	32	107	26.2083	26.3554	26.1131	26.5415	26.4049	26.7876
	0.675317	0.715464	AT2G07734.1	AT2G07734.1	549	Color2 [DarkGray]	1	4					-1	4	4	4	9.9	9.9	9.9	43.025	0	7.3039	69598000	19	11	23.0038	22.7452	22.8576	23.1039	21.6759	21.6804
	0.494592	-0.100298	AT2G14120.4;AT2G14120.2;AT2G14120.1;AT2G14120.3	AT2G14120.4;AT2G14120.2;AT2G14120.1;AT2G14120.3	553	Color2 [DarkGray]	1	4					-1	11	11	5	16.1	16.1	7.3	81.781	0	28.589	174430000	52	32	23.4832	23.4847	23.6647	23.7492	23.5261	23.6582
	0.928526	0.85415	AT2G14850.1	AT2G14850.1	555	Color2 [DarkGray]	1	4					-1	6	6	6	22	22	22	32.692	0	21.581	107780000	17	11	23.5451	23.3041	23.5103	23.2555	21.8078	22.7337
	0.384977	0.974712	AT2G15430.1;AT2G15430.3;AT2G15430.2;AT2G15400.2;AT2G15400.1	AT2G15430.1;AT2G15430.3;AT2G15430.2	556	Color2 [DarkGray]	1	4					-1	9	9	9	43.9	43.9	43.9	35.461	0	59.946	129940000	14	20	23.7934	23.2671	23.4953	23.5471	20.4353	23.6493
	0.35867	0.758502	AT2G15620.1	AT2G15620.1	557	Color2 [DarkGray]	1	4					-1	16	16	16	33.1	33.1	33.1	65.504	0	50.757	321220000	34	41	23.6497	23.907	24.399	24.0708	21.5203	24.0891
	0.606519	0.310307	AT2G15690.1	AT2G15690.1	558	Color2 [DarkGray]	1	4					-1	8	8	8	15.4	15.4	15.4	65.613	0	30.313	299430000	29	23	24.4539	24.3061	24.0064	24.2562	23.9719	23.6074
	0.150196	0.160522	AT2G16060.1	AT2G16060.1	561	Color2 [DarkGray]	1	4					-1	7	7	7	50	50	50	18.034	0	24.58	546190000	11	32	25.1922	25.5036	25.1227	25.4237	24.3547	25.5586
	2.70789	-0.827265	AT2G16440.1	AT2G16440.1	562	Color2 [DarkGray]	1	4					-1	15	15	15	18.3	18.3	18.3	93.655	0	36.795	109670000	43	30	22.4266	22.6551	22.3752	23.1799	23.3161	23.4427
	0.0446214	0.104513	AT2G16485.2;AT2G16485.1	AT2G16485.2;AT2G16485.1	563	Color2 [DarkGray]	1	4					-1	8	8	8	5.4	5.4	5.4	193.31	0	16.326	60040000	78	12	22.4346	21.6459	23.0817	23.087	20.9229	22.8388
	0.0391038	0.0329781	AT2G16570.1;AT4G34740.1;AT4G38880.1	AT2G16570.1	564	Color2 [DarkGray]	1	4					-1	17	17	17	33.6	33.6	33.6	61.842	0	160.44	1611800000	24	69	26.0236	25.8949	25.8417	25.8005	25.4489	26.4119
	0.304836	0.220291	AT2G16600.1;AT2G16600.2	AT2G16600.1;AT2G16600.2	565	Color2 [DarkGray]	1	4					-1	7	5	5	55.5	46.2	46.2	18.492	0	48.215	491830000	9	21	25.49	25.4934	25.0689	25.4006	24.6141	25.3767
	0.455479	0.112647	AT2G16950.2;AT2G16950.1	AT2G16950.2;AT2G16950.1	568	Color2 [DarkGray]	1	4					-1	12	12	12	16.2	16.2	16.2	99.108	0	60.161	280930000	42	36	24.0812	24.3092	24.304	23.985	24.2468	24.1246
	1.16042	1.53416	AT2G17130.2;AT2G17130.1	AT2G17130.2;AT2G17130.1	569	Color2 [DarkGray]	1	4					-1	6	2	2	23.4	8.5	8.5	39.148	0	40.514	90349000	16	12	23.6576	23.8135	23.4481	23.3226	21.6194	21.3747
	0.0141007	-0.0178026	AT2G17280.2;AT2G17280.1	AT2G17280.2;AT2G17280.1	571	Color2 [DarkGray]	1	4					-1	4	4	4	16.2	16.2	16.2	29.889	0	21.112	34594000	15	8	21.5527	22.3275	22.1222	22.2648	21.3324	22.4585
	0.614322	0.196646	AT5G07090.3;AT5G07090.2;AT2G17360.1;AT5G07090.1;AT5G58420.1;AT2G17360.2	AT5G07090.3;AT5G07090.2;AT2G17360.1;AT5G07090.1;AT5G58420.1;AT2G17360.2	572	Color2 [DarkGray]	1	4					-1	21	21	21	71.3	71.3	71.3	27.707	0	73.591	3967300000	16	95	27.3131	27.1333	26.9901	27.0045	26.7381	27.1039
	0.0820749	-0.26093	AT2G17420.2;AT2G17420.1;AT4G35460.1	AT2G17420.2;AT2G17420.1;AT4G35460.1	576	Color2 [DarkGray]	1	4					-1	6	6	6	23.3	23.3	23.3	38.257	0	28.812	161540000	13	13	24.1165	21.8451	23.6598	24.1005	21.7215	24.5821
	0.155861	-0.220144	AT2G17850.3;AT2G17850.1;AT2G17850.2	AT2G17850.3;AT2G17850.1;AT2G17850.2	580	Color2 [DarkGray]	1	4					-1	6	6	6	38.8	38.8	38.8	21.815	0	38.609	863970000	11	22	26.4448	26.4657	26.746	26.0455	27.779	26.4925
	0.487497	0.851931	AT2G17870.1	AT2G17870.1	581	Color2 [DarkGray]	1	4					-1	6	6	6	29.6	29.6	29.6	29.564	0	42.143	233900000	18	13	24.8995	24.8491	25.0261	24.9731	24.6813	22.5645
	0.49825	-0.139971	AT2G17930.1;REV__AT5G04240.1	AT2G17930.1	582	Color2 [DarkGray]	1	4					-1	152	152	95	48.8	48.8	33.7	436.35	0	323.31	9351400000	224	630	25.8673	25.8624	26.0792	26.0288	26.2677	25.9323
	0.633096	0.200478	AT2G18020.1;AT3G51190.1	AT2G18020.1	584	Color2 [DarkGray]	1	4					-1	11	11	3	46.1	46.1	18.6	27.859	0	53.701	3105300000	14	66	27.1884	27.316	27.1698	27.1109	26.7593	27.2026
	0.0298879	-0.025802	AT2G18040.1	AT2G18040.1	585	Color2 [DarkGray]	1	4					-1	6	6	6	52.1	52.1	52.1	13.015	0	21.986	457730000	9	23	25.0438	24.982	25.282	24.5804	25.3488	25.4559
	0.763177	1.82261	AT2G18110.1	AT2G18110.1	586	Color2 [DarkGray]	1	4					-1	11	8	5	62.3	55.4	41.6	25.266	0	35.025	204120000	11	22	23.8889	24.2347	24.0157	24.3564	21.5825	20.7325
	0.394881	0.933061	AT2G18510.1	AT2G18510.1	589	Color2 [DarkGray]	1	4					-1	6	6	6	22	22	22	39.888	0	22.264	172470000	13	16	24.015	24.075	23.8769	23.4895	21.1546	24.5237
	0.791679	-0.380959	AT2G19390.2;AT2G19390.1	AT2G19390.2;AT2G19390.1	591	Color2 [DarkGray]	1	4					-1	42	42	38	41.8	41.8	38.2	133.36	0	246	1146300000	53	119	24.6673	24.7344	24.7427	25.1648	24.6834	25.4391
	0.301532	0.804003	AT2G19480.3;AT2G19480.2;AT2G19480.1	AT2G19480.3;AT2G19480.2;AT2G19480.1	592	Color2 [DarkGray]	1	4					-1	5	4	4	16.4	14.2	14.2	42.846	0	7.2652	74183000	13	10	23.3124	23.4428	21.5295	23.6094	20.5525	21.7108
	0.921255	-1.58874	AT2G19490.1	AT2G19490.1	593	Color2 [DarkGray]	1	4					-1	8	8	8	23.3	23.3	23.3	46.159	0	30.577	90607000	23	12	20.9105	22.8156	20.3445	23.5296	22.5304	22.7768
	0.411974	-0.189884	AT2G19730.3;AT2G19730.2;AT2G19730.1	AT2G19730.3;AT2G19730.2;AT2G19730.1	597	Color2 [DarkGray]	1	4					-1	7	7	6	48.3	48.3	39.2	15.895	0	46.485	2075300000	7	39	28.1053	27.8958	27.7623	27.8516	28.0542	28.4272
	0.353297	0.752206	AT4G26230.1;AT2G19740.1;AT5G56710.1;AT5G56710.2	AT4G26230.1;AT2G19740.1;AT5G56710.1	598	Color2 [DarkGray]	1	4					-1	4	4	4	37.8	37.8	37.8	13.82	0	22.777	497310000	4	16	25.8854	26.1982	26.064	26.1725	26.1825	23.536
	0.0236821	-0.173016	AT5G56670.1;AT4G29390.1;AT2G19750.1	AT5G56670.1;AT4G29390.1;AT2G19750.1	599	Color2 [DarkGray]	1	4					-1	2	2	2	27.4	27.4	27.4	6.887	0	4.4741	676570000	3	10	27.3596	27.2242	21.6404	27.1211	27.1496	22.4726
	0.703788	0.547468	AT4G29040.1;AT2G20140.1	AT4G29040.1;AT2G20140.1	603	Color2 [DarkGray]	1	4					-1	12	12	12	32.7	32.7	32.7	49.369	0	97.768	658960000	25	38	25.2931	25.1714	25.7026	25.2435	25.0639	24.2172
	0.0540213	0.111849	AT2G20420.1	AT2G20420.1	607	Color2 [DarkGray]	1	4					-1	18	18	18	53.4	53.4	53.4	45.345	0	87.452	739410000	28	54	24.894	25.2827	24.5309	25.1759	23.469	25.7272
	0.479264	1.12675	AT2G20450.1	AT2G20450.1	608	Color2 [DarkGray]	1	4					-1	10	4	4	50.7	22.4	22.4	15.506	0	9.1268	283330000	6	15	25.0517	25.0459	25.1299	24.6911	21.9312	25.2249
	0.0282477	0.0281817	AT2G20550.1;AT2G20550.2;AT2G20560.1	AT2G20550.1;AT2G20550.2	609	Color2 [DarkGray]	1	4					-1	18	18	18	77.5	77.5	77.5	30.701	0	255.09	8700800000	15	127	28.8254	28.6991	29.1428	28.6046	29.4743	28.5039
	1.43045	0.2266	AT2G20580.1	AT2G20580.1	610	Color2 [DarkGray]	1	4					-1	32	32	20	46.5	46.5	31.4	98.143	0	138.89	1387300000	54	102	25.0782	25.2917	25.1756	24.9258	24.905	25.0349
	0.800364	1.2459	AT2G20760.1;AT3G51890.1	AT2G20760.1	611	Color2 [DarkGray]	1	4					-1	5	5	5	15.7	15.7	15.7	37.225	0	12.476	207500000	10	10	24.6218	24.543	24.4552	24.0145	21.8584	24.0093
	0.281439	0.684133	AT2G20800.1;AT4G28220.2;AT4G28220.1	AT2G20800.1	612	Color2 [DarkGray]	1	4					-1	14	14	13	25.4	25.4	23.9	65.371	0	55.588	374050000	29	37	24.4198	24.3024	24.4235	24.6109	21.7433	24.7391
	0.449799	0.602196	AT2G21130.1	AT2G21130.1	616	Color2 [DarkGray]	1	4					-1	7	7	3	46	46	23.6	18.464	0	16.692	197440000	11	23	23.9191	24.1486	23.6799	23.8375	22.1942	23.9093
	0.350381	0.575756	AT2G21170.2;AT2G21170.3;AT2G21170.1	AT2G21170.2;AT2G21170.3;AT2G21170.1	618	Color2 [DarkGray]	1	4					-1	6	6	6	26.5	26.5	26.5	32.306	0	19.007	187910000	16	16	24.3738	24.4637	23.9257	24.0039	22.405	24.627
	0.449836	0.612139	AT2G21230.4;AT2G21230.1;AT2G21230.3;AT2G21230.2	AT2G21230.4;AT2G21230.1;AT2G21230.3;AT2G21230.2	619	Color2 [DarkGray]	1	4					-1	6	6	6	14.1	14.1	14.1	56.326	0	23.747	75717000	25	17	22.7809	23.5594	22.9946	23.0733	21.425	23.0003
	0.027036	0.0752398	AT2G21330.3;AT2G21330.1;AT2G21330.2;AT4G38970.1;AT4G38970.2	AT2G21330.3;AT2G21330.1;AT2G21330.2;AT4G38970.1	622	Color2 [DarkGray]	1	4					-1	12	10	10	44	39.6	39.6	41.807	0	66.757	345410000	20	32	24.1294	24.4239	23.8357	24.8091	22.2273	25.1268
	0.2032	-0.07728	AT2G21390.1	AT2G21390.1	623	Color2 [DarkGray]	1	4					-1	36	36	17	37.6	37.6	19.5	136.47	0	175.3	1115000000	70	107	24.5382	24.7988	24.8749	24.678	24.7434	25.0223
	0.365653	-0.185991	AT2G21580.2;AT2G21580.1	AT2G21580.2;AT2G21580.1	626	Color2 [DarkGray]	1	4					-1	6	6	1	58.9	58.9	13.1	11.941	0	37.87	1176700000	6	23	26.1409	26.3354	25.9696	26.2789	26.6782	26.0468
	0.655813	-0.293907	AT2G21660.1;AT2G21660.2	AT2G21660.1;AT2G21660.2	627	Color2 [DarkGray]	1	4					-1	11	11	9	71	71	64.8	16.89	0	160.65	1950200000	12	57	26.3714	26.6653	26.2947	26.9361	26.4027	26.8744
	1.07502	0.126175	AT2G22230.1;AT5G10160.1	AT2G22230.1	628	Color2 [DarkGray]	1	4					-1	3	3	3	16.4	16.4	16.4	24.242	0	9.9322	133870000	10	12	23.9823	23.8387	24.0028	23.8236	23.8436	23.7781
	0.091293	0.15166	AT2G22250.1;AT2G22250.3;AT2G22250.2	AT2G22250.1;AT2G22250.3;AT2G22250.2	629	Color2 [DarkGray]	1	4					-1	6	6	6	18.2	18.2	18.2	46.038	0	20.71	58651000	19	15	22.9287	22.9226	21.3323	22.3279	21.7539	22.6469
	0.192322	0.129469	AT2G22360.1	AT2G22360.1	631	Color2 [DarkGray]	1	4					-1	33	33	25	65.4	65.4	57.9	47.761	0	323.31	6585200000	24	176	27.2827	27.239	27.3946	27.1893	26.7297	27.6088
	0.194843	0.235772	AT2G22780.1;AT5G09660.2;AT5G09660.3;AT5G09660.5;AT5G09660.1;AT5G09660.4	AT2G22780.1	634	Color2 [DarkGray]	1	4					-1	9	9	9	44.4	44.4	44.4	37.465	0	44.004	143780000	18	21	23.2648	23.7923	23.5581	23.5717	22.4447	23.8915
	0.260691	0.0809027	AT2G23350.1	AT2G23350.1	639	Color2 [DarkGray]	1	4					-1	35	33	31	51.8	50.5	48	71.652	0	323.31	13187000000	30	203	28.589	28.6511	28.6531	28.7859	28.3787	28.486
	0.0663927	-0.234393	AT2G23930.2;AT2G23930.1;AT3G11500.2;AT3G11500.1	AT2G23930.2;AT2G23930.1;AT3G11500.2;AT3G11500.1	640	Color2 [DarkGray]	1	4					-1	2	2	2	66.7	66.7	66.7	5.7965	0	23.614	158920000	4	10	24.7933	21.5684	24.8546	24.5019	22.8138	24.6038
	0.00785095	-0.0183455	AT2G24050.1	AT2G24050.1	641	Color2 [DarkGray]	1	4					-1	12	12	12	16.3	16.3	16.3	82.889	0	25.943	103290000	44	17	22.8215	21.0979	23.0561	22.9255	21.4428	22.6623
	0.104983	0.308447	AT2G24200.3;AT2G24200.2;AT2G24200.1	AT2G24200.3;AT2G24200.2;AT2G24200.1	642	Color2 [DarkGray]	1	4					-1	5	5	3	16.5	16.5	11.6	50.592	0	38.803	98527000	27	12	21.4204	23.3934	23.4078	23.8373	22.4874	20.9716
	0.141659	-0.779319	AT2G25720.1	AT2G25720.1	646	Color2 [DarkGray]	1	4					-1	6	6	6	49.6	49.6	49.6	13.026	0	21.712	258040000	6	17	24.563	21.4977	25.0049	23.6413	27.7629	21.9994
	1.49896	0.967641	AT2G25760.1;AT2G25760.2	AT2G25760.1;AT2G25760.2	648	Color2 [DarkGray]	1	4					-1	14	14	12	25.1	25.1	22.4	76.181	0	61.812	198090000	37	39	23.5229	23.7687	23.8994	22.3083	22.7136	23.2661
	0.366838	0.747433	AT2G27020.1;AT2G27020.2	AT2G27020.1;AT2G27020.2	655	Color2 [DarkGray]	1	4					-1	6	6	6	28.1	28.1	28.1	27.377	0	17.528	129390000	16	14	23.9549	23.8912	23.7108	24.0099	21.4092	23.8956
	0.109034	-0.432812	AT3G43810.2;AT5G21274.1;AT2G27030.3;AT2G41110.2;AT2G27030.1;AT2G41110.1;AT3G56800.1;AT3G43810.1;AT1G66410.1;AT5G37780.1;AT1G66410.2;AT5G37780.2;AT5G37780.3;AT3G43810.4;AT5G37780.4;AT3G43810.3;AT1G66410.3;AT1G66410.4	AT3G43810.2;AT5G21274.1;AT2G27030.3;AT2G41110.2;AT2G27030.1;AT2G41110.1;AT3G56800.1;AT3G43810.1;AT1G66410.1;AT5G37780.1;AT1G66410.2;AT5G37780.2;AT5G37780.3;AT3G43810.4;AT5G37780.4;AT3G43810.3	656	Color2 [DarkGray]	1	4					-1	6	6	6	44.4	44.4	44.4	24.565	0	51.416	115380000	13	14	23.8457	21.6808	24.5279	21.5034	25.182	24.6674
	0.00817905	-0.00496356	AT2G27100.1	AT2G27100.1	657	Color2 [DarkGray]	1	4					-1	8	8	8	13.5	13.5	13.5	81.097	0	49.119	115190000	36	23	22.8871	23.1671	23.4363	23.3635	23.1954	22.9466
	0.354061	-0.130141	AT2G27200.1;AT1G08410.1	AT2G27200.1	659	Color2 [DarkGray]	1	4					-1	25	25	25	59.8	59.8	59.8	60.757	0	173.4	1869400000	32	97	25.5957	25.2771	25.5324	25.6032	25.3921	25.8002
	0.444419	1.50734	AT2G27530.2;AT2G27530.1	AT2G27530.2;AT2G27530.1	660	Color2 [DarkGray]	1	4					-1	8	8	4	40.7	40.7	23.1	24.425	0	18.702	856280000	11	21	27.1919	27.3148	27.0976	27.0576	22.7842	27.2405
	0.233762	0.487526	AT2G27600.1	AT2G27600.1	661	Color2 [DarkGray]	1	4					-1	15	15	15	44.8	44.8	44.8	48.592	0	97.537	341050000	28	45	23.6903	23.6494	23.6275	23.815	21.5417	24.1479
	0.325481	-1.79345	AT2G27710.4;AT2G27710.3;AT2G27710.2;AT2G27710.1	AT2G27710.4;AT2G27710.3;AT2G27710.2;AT2G27710.1	663	Color2 [DarkGray]	1	4					-1	3	2	2	32.7	22.4	22.4	10.243	0.00061087	3.5977	440080000	6	10	21.556	26.3669	21.9831	26.3281	27.1528	21.8054
	0.427926	-1.11724	AT2G27720.1;AT2G27720.3;AT2G27720.2;AT2G27720.4	AT2G27720.1;AT2G27720.3;AT2G27720.2;AT2G27720.4	664	Color2 [DarkGray]	1	4					-1	3	3	2	48.7	48.7	40	11.452	0	24.404	264550000	5	13	25.5095	22.5672	26.1184	25.6152	26.2607	25.671
	0.524228	-0.391876	AT2G27730.4;AT2G27730.3;AT2G27730.2;AT2G27730.1	AT2G27730.4;AT2G27730.3;AT2G27730.2;AT2G27730.1	665	Color2 [DarkGray]	1	4					-1	2	2	2	26.5	26.5	26.5	11.947	0	14.137	31204000	5	10	22.5523	22.6109	21.6866	22.6924	22.9032	22.4298
	0.0322148	-0.0167141	AT2G28000.1	AT2G28000.1	669	Color2 [DarkGray]	1	4					-1	29	28	28	65	63.8	63.8	62.071	0	259.36	4812900000	31	132	26.7879	26.8281	26.7575	26.9064	26.4699	27.0473
	0.0125063	-0.0154572	AT2G28290.2;AT2G28290.4;AT2G28290.3;AT2G28290.6;AT2G28290.1;AT2G28290.5	AT2G28290.2;AT2G28290.4;AT2G28290.3;AT2G28290.6;AT2G28290.1;AT2G28290.5	670	Color2 [DarkGray]	1	4					-1	11	11	11	3.4	3.4	3.4	384.79	0	30.632	49584000	141	25	21.8253	21.6972	22.112	22.3825	21.1241	22.1744
	0.136442	0.0770206	AT2G29200.2;AT2G29200.1	AT2G29200.2;AT2G29200.1	675	Color2 [DarkGray]	1	4					-1	19	19	4	25.9	25.9	8.2	106.56	0	89.059	460690000	39	51	24.5256	24.4222	24.6539	24.3545	24.1781	24.8381
	0.126622	-0.0760358	AT2G29550.1	AT2G29550.1	677	Color2 [DarkGray]	1	4					-1	24	7	2	58.1	22.9	6.9	50.747	0	45.616	1124300000	21	30	26.7091	26.5019	26.3962	26.6362	26.2539	26.9453
	0.118067	0.191034	AT2G29570.1	AT2G29570.1	678	Color2 [DarkGray]	1	4					-1	8	8	2	36.7	36.7	6.8	29.222	0	38.666	189090000	16	23	23.7873	24.4765	23.6677	24.1925	22.7306	24.4354
	0.0653613	0.123728	AT2G31060.1;AT2G31060.2;AT2G31060.3	AT2G31060.1;AT2G31060.2;AT2G31060.3	684	Color2 [DarkGray]	1	4					-1	2	2	2	5.1	5.1	5.1	57.351	0.000625	3.8462	19349000	24	9	21.5133	22.0735	21.3021	20.7881	20.9937	22.7359
	0.378164	0.561501	AT2G32080.2;AT2G32080.1	AT2G32080.2;AT2G32080.1	691	Color2 [DarkGray]	1	4					-1	10	10	10	36.9	36.9	36.9	32.101	0	34.917	105160000	16	18	23.1323	23.1278	23.0995	23.1261	21.3134	23.2355
	0.0100008	0.0353966	AT2G32520.3;AT2G32520.1;AT2G32520.4;AT2G32520.2	AT2G32520.3;AT2G32520.1;AT2G32520.4;AT2G32520.2	692	Color2 [DarkGray]	1	4					-1	5	5	5	30.7	30.7	30.7	24.331	0	18.976	201810000	10	15	24.6369	24.8219	21.7368	24.2521	22.495	24.3422
	0.931267	0.91083	AT2G32600.1	AT2G32600.1	693	Color2 [DarkGray]	1	4					-1	5	5	5	23.1	23.1	23.1	31.369	0	18.071	95684000	13	18	22.9064	23.1967	23.1915	23.0814	21.7331	21.7477
	0.481893	0.883654	AT2G32730.1	AT2G32730.1	695	Color2 [DarkGray]	1	4					-1	18	18	8	24.9	24.9	10.4	108.98	0	100.19	474270000	38	52	24.4497	24.4554	24.6592	24.1847	22.0733	24.6555
	0.155934	0.409838	AT2G33040.1	AT2G33040.1	696	Color2 [DarkGray]	1	4					-1	4	4	4	19.1	19.1	19.1	35.448	0	20.763	129530000	19	9	21.2053	23.8704	23.3995	23.3507	21.4748	22.4202
	0.0310092	0.0475903	AT2G33210.2;AT2G33210.1	AT2G33210.2;AT2G33210.1	698	Color2 [DarkGray]	1	4					-1	31	14	14	61.7	36.4	36.4	61.477	0	135.38	997460000	35	52	25.2711	25.5173	25.4915	25.8388	24.3585	25.9398
	0.23999	0.0845814	AT2G34480.1;AT2G34480.2	AT2G34480.1;AT2G34480.2	705	Color2 [DarkGray]	1	4					-1	14	14	4	62.4	62.4	21.9	21.307	0	93.685	1522500000	8	61	26.409	26.392	26.2778	26.0132	26.3687	26.4431
	0.617318	-0.258794	AT2G35040.2;AT2G35040.1	AT2G35040.2;AT2G35040.1	708	Color2 [DarkGray]	1	4					-1	7	7	7	17.4	17.4	17.4	59.471	0	26.105	91659000	29	21	22.4433	22.5375	22.7462	23.1513	22.5919	22.7601
	0.960824	-0.571927	AT2G35050.2;AT2G35050.1	AT2G35050.2;AT2G35050.1	709	Color2 [DarkGray]	1	4					-1	45	41	40	40.7	37.9	37.4	139.7	0	323.31	4480100000	53	195	26.2054	26.0975	26.2753	26.6499	26.3582	27.2859
	0.137233	-0.231927	AT2G35230.1;AT2G35230.3;AT2G35230.2	AT2G35230.1;AT2G35230.3	711	Color2 [DarkGray]	1	4					-1	4	4	4	12.4	12.4	12.4	44.686	0	38.93	631830000	16	32	25.2718	25.8019	25.7517	25.0619	27.0225	25.4366
	0.251406	-0.165407	AT2G35500.1	AT2G35500.1	714	Color2 [DarkGray]	1	4					-1	15	15	15	55.3	55.3	55.3	42.687	0	121.66	1955300000	19	62	26.3748	26.3388	26.7585	26.3317	27.0851	26.5516
	0.140531	-0.174604	AT2G35920.3;AT2G35920.1;AT2G35920.2	AT2G35920.3;AT2G35920.1;AT2G35920.2	719	Color2 [DarkGray]	1	4					-1	34	34	34	42.7	42.7	42.7	114.64	0	267.58	2554400000	54	140	25.8716	25.6773	25.878	26.462	26.4153	25.0735
	1.79493	-0.478685	AT2G36070.1	AT2G36070.1	721	Color2 [DarkGray]	1	4					-1	6	6	6	17.5	17.5	17.5	53.645	0	22.289	49303000	26	13	22.1263	22.2211	22.152	22.5933	22.867	22.4752
	0.291958	0.64146	AT2G36250.4;AT2G36250.3;AT2G36250.2;AT2G36250.1	AT2G36250.4;AT2G36250.3;AT2G36250.2;AT2G36250.1	725	Color2 [DarkGray]	1	4					-1	12	12	7	46.9	46.9	25.7	41.583	0	71.338	282610000	16	34	24.524	24.4798	24.6991	24.5564	22.1757	25.0464
	0.0322115	0.0335801	AT2G36460.1;AT2G36460.3;AT2G36460.2;AT5G03690.2;AT5G03690.1;AT4G26530.3;AT4G26530.2;AT4G26530.1;AT5G03690.4;AT5G03690.3	AT2G36460.1;AT2G36460.3;AT2G36460.2	726	Color2 [DarkGray]	1	4					-1	22	12	12	79.3	46.6	46.6	38.386	0	121.91	1716500000	23	47	26.2971	26.6337	25.9958	26.2989	25.7451	26.7818
	0.272908	-0.344983	AT2G36530.1;AT2G36530.2	AT2G36530.1;AT2G36530.2	727	Color2 [DarkGray]	1	4					-1	19	19	19	62.8	62.8	62.8	47.719	0	127.58	964530000	25	56	25.4589	25.5772	24.9592	25.8579	24.7872	26.3852
	1.1198	2.88513	AT2G36880.2;AT2G36880.1	AT2G36880.2;AT2G36880.1	729	Color2 [DarkGray]	1	4					-1	12	4	4	46.7	17.9	17.9	42.497	0	41.779	236690000	20	13	25.1607	25.0774	25.289	24.6956	21.322	20.8541
	0.465155	0.0860564	AT2G37270.2;AT2G37270.1	AT2G37270.2;AT2G37270.1	733	Color2 [DarkGray]	1	4					-1	15	15	3	51.2	51.2	15.9	22.99	0	55.386	1721700000	11	72	26.5915	26.6546	26.3977	26.4291	26.4565	26.4999
	0.126761	0.0705357	AT3G53750.2;AT3G53750.1;AT2G37620.4;AT2G37620.3;AT2G37620.2;AT2G37620.1	AT3G53750.2;AT3G53750.1;AT2G37620.4;AT2G37620.3;AT2G37620.2;AT2G37620.1	734	Color2 [DarkGray]	1	4					-1	23	8	4	67.1	30.5	18.6	41.797	0	69.94	1058400000	21	33	26.0461	25.8998	25.8246	25.6734	25.6463	26.2392
	0.234851	0.0350939	AT2G38250.1	AT2G38250.1	737	Color2 [DarkGray]	1	4					-1	13	13	13	36.7	36.7	36.7	34.307	0	66.62	4463800000	12	103	27.9602	27.9216	27.8184	27.8835	27.9243	27.7871
	0.895314	0.223671	AT2G39050.1	AT2G39050.1	745	Color2 [DarkGray]	1	4					-1	14	14	14	43.8	43.8	43.8	35.647	0	77.591	3478600000	14	79	27.6174	27.2553	27.5423	27.2033	27.2185	27.3222
	0.336139	0.092207	AT3G55280.3;AT3G55280.2;AT3G55280.1;AT2G39460.2;AT2G39460.1	AT3G55280.3;AT3G55280.2;AT3G55280.1;AT2G39460.2;AT2G39460.1	750	Color2 [DarkGray]	1	4					-1	8	8	8	39.2	39.2	39.2	16.744	0	21.845	990460000	5	37	26.613	26.556	26.4129	26.2594	26.5914	26.4545
	0.601149	0.175372	AT2G39730.1;AT2G39730.3;AT2G39730.2	AT2G39730.1;AT2G39730.3;AT2G39730.2	752	Color2 [DarkGray]	1	4					-1	21	21	21	63.7	63.7	63.7	51.981	0	229.57	1031600000	21	70	25.616	25.5779	25.5922	25.5475	25.1597	25.5528
	0.296196	0.293192	AT2G39990.1	AT2G39990.1	755	Color2 [DarkGray]	1	4					-1	11	11	11	64.5	64.5	64.5	31.862	0	117.22	630720000	16	50	25.1679	24.9622	25.3003	25.2866	24.074	25.1903
	2.0405	1.72327	AT2G40060.1	AT2G40060.1	756	Color2 [DarkGray]	1	4					-1	4	4	4	20.9	20.9	20.9	28.837	0	7.4352	69320000	11	10	23.8626	23.5689	23.5763	22.6485	21.6101	21.5795
	0.311066	0.642267	AT2G40290.1;AT2G40290.3;AT2G40290.2	AT2G40290.1;AT2G40290.3;AT2G40290.2	759	Color2 [DarkGray]	1	4					-1	8	8	8	25	25	25	38.747	0	48.195	161810000	20	26	23.1271	23.4108	23.3936	23.4167	20.9954	23.5926
	0.18542	-0.0893205	AT2G40590.1;AT2G40510.1	AT2G40590.1;AT2G40510.1	761	Color2 [DarkGray]	1	4					-1	5	5	3	42.7	42.7	24.4	14.729	0	18.257	480130000	6	22	26.377	26.2455	26.0515	26.1249	26.6271	26.1899
	0.310078	0.699865	AT2G40650.1	AT2G40650.1	763	Color2 [DarkGray]	1	4					-1	8	8	8	25.9	25.9	25.9	43.172	0	25.058	113790000	17	16	23.1842	22.9152	22.904	24.081	21.031	21.7919
	0.279197	0.593294	AT2G40660.1	AT2G40660.1	764	Color2 [DarkGray]	1	4					-1	8	8	8	28.3	28.3	28.3	42.088	0	39.757	197530000	24	28	24.0014	23.5971	23.3141	23.5014	21.4317	24.1996
	0.58376	1.48327	AT2G41040.1	AT2G41040.1	767	Color2 [DarkGray]	1	4					-1	7	7	7	24.7	24.7	24.7	39.23	0	46.564	157270000	18	11	24.6629	22.481	24.4922	24.037	20.9745	22.1748
	0.799444	0.553228	AT2G41080.1	AT2G41080.1	769	Color2 [DarkGray]	1	4					-1	2	2	2	4.9	4.9	4.9	72.815	0	5.7056	19431000	37	6	22.0657	21.3575	21.6504	21.1532	20.7061	21.5546
	0.520475	-1.05677	AT2G41220.1;AT5G04140.1;AT5G04140.2	AT2G41220.1	770	Color2 [DarkGray]	1	4					-1	19	19	19	14.7	14.7	14.7	177.75	0	60.719	165680000	88	32	21.4409	23.4956	23.0956	24.165	22.4888	24.5486
	0.837402	-0.309048	AT2G41430.5;AT2G41430.4;AT2G41430.2;AT2G41430.1;AT2G41430.3	AT2G41430.5;AT2G41430.4;AT2G41430.2;AT2G41430.1;AT2G41430.3	772	Color2 [DarkGray]	1	4					-1	3	3	3	18.4	18.4	18.4	18.411	0	13.835	211360000	4	14	24.3494	24.2162	24.5793	24.6425	24.4857	24.9438
	0.719979	0.291723	AT2G41840.1	AT2G41840.1	776	Color2 [DarkGray]	1	4					-1	17	17	6	55.8	55.8	23.9	30.878	0	77.931	3139400000	16	82	26.721	26.792	26.554	26.7188	26.1338	26.3393
	0.453123	-0.122754	AT2G42520.3;AT2G42520.2;AT2G42520.1	AT2G42520.3;AT2G42520.2;AT2G42520.1	781	Color2 [DarkGray]	1	4					-1	53	53	30	68.7	68.7	48	67.625	0	323.31	142090000000	34	610	31.0198	30.8336	31.0215	31.0125	30.9552	31.2756
	1.27295	0.869838	AT2G42570.1	AT2G42570.1	782	Color2 [DarkGray]	1	4					-1	5	5	5	13.9	13.9	13.9	43.165	0	11.811	87783000	17	15	22.8351	23.1876	23.0211	22.33	22.5535	21.5507
	0.334701	0.24353	AT2G42610.2;AT2G42610.1;AT5G58500.1;AT5G28490.1;AT4G18610.1;AT3G23290.2;AT1G07090.1;AT3G04510.1;AT2G31160.1;AT1G16910.1;AT1G78815.1	AT2G42610.2;AT2G42610.1	784	Color2 [DarkGray]	1	4					-1	9	9	9	66.7	66.7	66.7	19.791	0	69.48	734480000	9	35	26.0386	26.0766	26.218	25.8147	26.4032	25.3848
	0.072579	0.0890884	AT2G42710.1	AT2G42710.1	786	Color2 [DarkGray]	1	4					-1	6	6	6	21.9	21.9	21.9	45.78	0	22.63	99195000	22	17	22.9871	22.9144	23.312	22.8348	22.3526	23.7589
	0.0114873	-0.0104548	AT5G45775.1;AT5G45775.2;AT4G18730.1;AT3G58700.1;AT2G42740.1	AT5G45775.1;AT5G45775.2;AT4G18730.1;AT3G58700.1;AT2G42740.1	787	Color2 [DarkGray]	1	4					-1	5	5	5	39	39	39	19.775	0	26.875	1496900000	7	19	27.1252	27.0999	27.2089	27.27	26.5904	27.6051
	0.108004	0.226584	AT2G42810.5;AT2G42810.4;AT2G42810.1;AT2G42810.3;AT2G42810.2	AT2G42810.5;AT2G42810.4;AT2G42810.1;AT2G42810.3;AT2G42810.2	789	Color2 [DarkGray]	1	4					-1	11	11	11	31.2	31.2	31.2	54.702	0	47.452	131240000	27	20	23.2124	23.6113	22.2134	23.5983	21.5375	23.2215
	0.253103	0.275476	AT2G42910.1	AT2G42910.1	791	Color2 [DarkGray]	1	4					-1	13	13	13	46.3	46.3	46.3	37.56	0	62.647	492560000	19	37	24.6339	24.3253	25.0493	24.7681	23.6388	24.7753
	0.0458679	0.047526	AT2G43090.1;AT2G43090.2;AT2G43100.1	AT2G43090.1;AT2G43090.2	792	Color2 [DarkGray]	1	4					-1	8	8	7	41.8	41.8	36.7	26.79	0	72.523	607240000	16	34	25.0749	25.2724	24.8223	24.8739	24.518	25.6351
	0.00788186	0.00609907	AT2G43140.2;AT2G42280.1;AT2G42280.3	AT2G43140.2	794	Color2 [DarkGray]	1	4					-1	20	20	6	86.1	86.1	39.2	33.803	0	323.31	17287000000	14	147	29.523	29.4498	29.2633	29.7782	28.9512	29.4884
	0.726052	1.09124	AT2G43360.1	AT2G43360.1	796	Color2 [DarkGray]	1	4					-1	6	6	6	25.7	25.7	25.7	41.681	0	29.223	136360000	20	20	23.5145	22.9758	23.2663	23.3952	21.9965	21.0912
	0.581605	0.206092	AT2G43710.2;AT2G43710.1;AT5G16230.2;AT3G02620.3;AT5G16230.1;AT3G02620.1;AT3G02620.2;AT3G02610.1;AT3G02610.2	AT2G43710.2;AT2G43710.1	801	Color2 [DarkGray]	1	4					-1	12	12	7	36.7	36.7	25.4	45.65	0	47.857	328040000	23	34	23.9037	24.2034	24.2167	24.0274	23.6609	24.0172
	0.139958	0.154915	AT2G43750.2;AT2G43750.1	AT2G43750.2;AT2G43750.1	802	Color2 [DarkGray]	1	4					-1	11	11	10	40.6	40.6	37.5	41.656	0	66.576	639430000	23	33	24.4803	25.0588	24.4091	24.8141	23.7872	24.8822
	0.876138	-0.632027	AT2G43770.1	AT2G43770.1	803	Color2 [DarkGray]	1	4					-1	4	4	4	20.7	20.7	20.7	37.885	0	14.463	65186000	19	11	21.7486	22.403	21.5906	22.5272	22.1649	22.9462
	0.205525	-0.509525	AT2G44040.1;AT3G59890.2;AT3G59890.1	AT2G44040.1;AT3G59890.2;AT3G59890.1	808	Color2 [DarkGray]	1	4					-1	4	4	4	15.9	15.9	15.9	37.55	0	9.648	116490000	16	9	21.9939	24.0049	22.8008	23.9326	21.9532	24.4423
	0.49	1.42812	AT2G44050.1	AT2G44050.1	809	Color2 [DarkGray]	1	4					-1	4	4	4	17.2	17.2	17.2	24.024	0	16.949	369540000	12	18	24.6434	25.2346	25.3858	25.4485	24.2763	21.2547
	0.2286	-0.0979551	AT2G44060.2;AT2G44060.1	AT2G44060.2;AT2G44060.1	810	Color2 [DarkGray]	1	4					-1	18	18	18	62.2	62.2	62.2	36.036	0	113.64	1684900000	23	80	25.5843	25.8477	25.5395	25.7761	25.5072	25.9822
	0.151382	0.393557	AT2G44100.2;AT2G44100.1	AT2G44100.2;AT2G44100.1	811	Color2 [DarkGray]	1	4					-1	13	7	6	42	24.1	18.8	48.438	0	52.334	281120000	21	25	23.8665	24.2413	23.7049	24.5107	21.6303	24.491
	0.120541	0.186099	AT2G44160.1	AT2G44160.1	813	Color2 [DarkGray]	1	4					-1	6	6	3	12	12	6.9	66.801	0	21.179	101410000	36	16	23.1718	23.1697	22.7806	23.322	21.7626	23.4794
	0.450601	0.592887	AT2G44350.4;AT2G44350.1;AT2G44350.3;AT2G44350.2;AT3G60100.1;AT3G60100.2	AT2G44350.4;AT2G44350.1;AT2G44350.3;AT2G44350.2	816	Color2 [DarkGray]	1	4					-1	11	11	11	30	30	30	52.654	0	39.687	217090000	23	28	23.9777	24.0931	23.938	23.5954	22.3529	24.2819
	0.388626	-0.373887	AT2G44530.2;AT2G44530.1	AT2G44530.2;AT2G44530.1	817	Color2 [DarkGray]	1	4					-1	8	5	4	26.7	19.6	16.8	42.496	0	21.891	80657000	18	14	22.6118	21.8838	22.3934	23.1488	22.8574	22.0044
	0.371516	0.743368	AT2G45240.1;AT2G45240.2	AT2G45240.1;AT2G45240.2	821	Color2 [DarkGray]	1	4					-1	9	9	9	31.2	31.2	31.2	43.992	0	36.382	180220000	25	20	24.0691	23.6814	23.6535	23.943	21.4052	23.8257
	0.0605194	0.163146	AT2G45290.2;AT2G45290.1	AT2G45290.2;AT2G45290.1	822	Color2 [DarkGray]	1	4					-1	14	8	8	28.9	19.7	19.7	79.921	0	79.318	282350000	33	25	23.7878	24.0323	23.598	24.1189	21.8544	24.9553
	0.426195	1.19673	AT2G45300.4;AT2G45300.2;AT2G45300.1;AT2G45300.3	AT2G45300.4;AT2G45300.2;AT2G45300.1;AT2G45300.3	823	Color2 [DarkGray]	1	4					-1	10	10	3	23.5	23.5	7.1	55.733	0	33.435	328760000	25	39	23.775	24.2266	24.0807	24.0706	20.4477	23.9738
	0.452334	-0.330538	AT2G45440.1;AT3G60880.1;AT3G60880.2	AT2G45440.1;AT3G60880.1;AT3G60880.2	825	Color2 [DarkGray]	1	4					-1	6	6	6	22.5	22.5	22.5	40.292	0	20.285	113340000	16	20	23.4033	23.2045	23.0928	23.7099	22.9847	23.9977
	0.267881	1.07364	AT2G45710.1;AT3G61110.1;AT3G61111.2;AT3G61111.1	AT2G45710.1;AT3G61110.1	828	Color2 [DarkGray]	1	4					-1	3	3	2	45.2	45.2	29.8	9.405	0	18.981	658950000	3	18	26.059	26.5748	26.0752	26.6756	21.9762	26.8363
	0.521665	0.164507	AT2G45810.1	AT2G45810.1	830	Color2 [DarkGray]	1	4					-1	13	5	4	30.1	14.8	12.1	60.42	0	27.865	132100000	28	19	24.0359	23.7413	23.9301	23.9466	23.6852	23.582
	0.435503	-0.18019	AT2G46020.6;AT2G46020.5;AT2G46020.1;AT2G46020.4;AT2G46020.3;AT2G46020.2	AT2G46020.6;AT2G46020.5;AT2G46020.1;AT2G46020.4;AT2G46020.3;AT2G46020.2	832	Color2 [DarkGray]	1	4					-1	48	48	48	28.8	28.8	28.8	245.44	0	234.82	1564700000	106	157	24.8236	24.8117	25.1324	25.2863	24.8214	25.2005
	0.0236538	0.00766818	AT2G46280.2;AT2G46280.1;AT2G46280.3;AT2G46290.1	AT2G46280.2;AT2G46280.1;AT2G46280.3	834	Color2 [DarkGray]	1	4					-1	10	10	10	44.8	44.8	44.8	36.388	0	71.984	505690000	17	38	24.5785	24.7328	24.678	24.8432	24.5098	24.6134
	0.0139678	0.020998	AT2G46520.1	AT2G46520.1	835	Color2 [DarkGray]	1	4					-1	16	16	16	21.8	21.8	21.8	108.66	0	58.386	316150000	49	41	24.0838	24.0532	24.1648	24.1704	23.1782	24.8902
	0.135491	-0.223016	AT2G46900.1	AT2G46900.1	836	Color2 [DarkGray]	1	4					-1	14	14	14	26	26	26	71.421	0	68.139	110550000	31	38	22.1858	22.616	22.5114	23.5871	21.5557	22.8394
	0.628368	0.40827	AT3G62250.1;AT2G47110.1;AT2G47110.2;AT1G23410.1;AT4G05320.2;AT5G20620.1;AT4G05320.3;AT4G05320.6;AT3G52590.1;AT2G36170.1;AT4G05320.4;AT1G65350.1;AT5G03240.1;AT5G03240.3;AT5G20620.2;AT5G03240.2;AT4G05320.5;AT4G05320.1;AT4G02890.4;AT4G02890.3;AT4G05320.8;AT4G05050.4;AT4G05320.7;AT2G35635.1;AT1G31340.1;AT5G37640.1;AT4G02890.1;AT4G02890.2;AT4G05050.1;AT4G05050.2;AT4G05050.3;AT1G55060.1;AT3G09790.1;AT3…	AT3G62250.1;AT2G47110.1;AT2G47110.2;AT1G23410.1;AT4G05320.2;AT5G20620.1;AT4G05320.3;AT4G05320.6;AT3G52590.1;AT2G36170.1;AT4G05320.4;AT1G65350.1;AT5G03240.1;AT5G03240.3;AT5G20620.2;AT5G03240.2;AT4G05320.5;AT4G05320.1;AT4G02890.4;AT4G02890.3;AT4G05320.8;AT4G05050.4;AT4G05320.7;AT2G35635.1;AT1G31340.1;AT5G37640.1;AT4G02890.1;AT4G02890.2;AT4G05050.1;AT4G05050.2;AT4G05050.3;AT1G55060.1	838	Color2 [DarkGray]	1	4					-1	7	7	7	50.3	50.3	50.3	17.797	0	32.172	1503900000	7	30	27.5507	27.1997	26.5546	26.6508	26.726	26.7035
	0.0509325	-0.0988566	AT2G47470.3;AT2G47470.1;AT2G47470.4;AT2G47470.2	AT2G47470.3;AT2G47470.1;AT2G47470.4;AT2G47470.2	839	Color2 [DarkGray]	1	4					-1	7	7	6	22.9	22.9	20.7	35.62	0	13.077	87173000	18	11	21.6375	23.3456	23.4197	23.0125	22.2881	23.3987
	0.0440317	0.0781015	AT3G62840.1;AT2G47640.4;AT2G47640.1	AT3G62840.1;AT2G47640.4;AT2G47640.1	843	Color2 [DarkGray]	1	4					-1	4	4	1	44	44	11	12.635	0	9.374	58907000	6	14	21.7808	23.1211	23.3365	23.1731	21.9707	22.8602
	0.0241617	0.0727908	AT3G01280.1	AT3G01280.1	848	Color2 [DarkGray]	1	4					-1	8	8	6	35.9	35.9	31.5	29.425	0	40.037	438160000	14	25	24.4493	24.6817	24.2269	24.9096	22.4463	25.7836
	0.0139489	0.0337092	AT3G01340.2;AT3G01340.1	AT3G01340.2;AT3G01340.1	849	Color2 [DarkGray]	1	4					-1	4	4	3	24.5	24.5	20.5	32.63	0	15.342	98858000	16	11	23.8353	22.3165	23.766	23.8547	22.0176	23.9443
	0.00565214	0.0058136	AT3G01540.1;AT3G01540.4;AT3G01540.3;AT3G01540.2;AT5G14610.4;AT5G14610.7;AT5G14610.3;AT5G14610.6;AT5G14610.2;AT5G14610.5;AT5G14610.1	AT3G01540.1;AT3G01540.4;AT3G01540.3;AT3G01540.2	850	Color2 [DarkGray]	1	4					-1	10	8	7	16.7	14.7	12.9	67.64	0	24.313	144920000	37	26	23.6729	23.7954	23.5845	23.5008	23.2139	24.3207
	0.993339	-0.465275	AT3G01560.1;AT3G01560.2	AT3G01560.1;AT3G01560.2	851	Color2 [DarkGray]	1	4					-1	11	11	11	30.1	30.1	30.1	55.492	0	50.515	187730000	23	35	22.9378	23.6017	23.477	23.778	23.9577	23.6768
	0.422029	0.248266	AT3G01890.1	AT3G01890.1	854	Color2 [DarkGray]	1	4					-1	8	7	7	23.4	21.2	21.2	51.328	0	26.449	135970000	20	20	23.7001	23.0413	23.3776	22.9073	23.4453	23.0216
	0.426574	1.27751	AT3G02080.1	AT3G02080.1	856	Color2 [DarkGray]	1	4					-1	5	5	2	35	35	19.6	15.828	0	61.459	310060000	9	24	24.7034	24.4633	24.8538	24.5203	24.8144	20.8533
	0.45832	0.687768	AT3G02090.1;AT3G02090.2	AT3G02090.1;AT3G02090.2	857	Color2 [DarkGray]	1	4					-1	12	12	12	30.3	30.3	30.3	59.159	0	48.606	218910000	27	35	24.087	23.8449	23.4171	23.5268	21.8778	23.8811
	0.659123	0.353288	AT3G02200.2;AT3G02200.1	AT3G02200.2;AT3G02200.1	858	Color2 [DarkGray]	1	4					-1	12	12	11	35.5	35.5	33.8	46.784	0	46.446	160030000	24	22	23.9112	23.3566	23.5959	23.4671	22.9046	23.4322
	0.255191	0.348181	AT3G02260.2;AT3G02260.3;AT3G02260.4;AT3G02260.1	AT3G02260.2;AT3G02260.3;AT3G02260.4;AT3G02260.1	860	Color2 [DarkGray]	1	4					-1	27	27	27	7.1	7.1	7.1	565.6	0	65.358	154070000	258	37	22.7081	23.2751	22.9386	23.2644	23.0096	21.6033
	0.257655	0.45616	AT3G02530.1	AT3G02530.1	862	Color2 [DarkGray]	1	4					-1	18	18	4	45.4	45.4	12.5	58.949	0	103.7	798750000	29	56	25.1588	24.981	25.4079	25.0998	23.3831	25.6964
	0.348507	0.710173	AT3G02560.3;AT3G02560.2;AT3G02560.1	AT3G02560.3;AT3G02560.2;AT3G02560.1	863	Color2 [DarkGray]	1	4					-1	7	4	4	34.6	24.6	24.6	22.196	0	35.313	88755000	8	10	23.5046	23.234	21.6147	23.1204	21.0226	22.0798
	1.87845	1.0393	AT3G02650.1	AT3G02650.1	865	Color2 [DarkGray]	1	4					-1	5	5	5	8.3	8.3	8.3	63.837	0	8.1627	71012000	31	14	22.7528	22.4374	23.0664	21.3865	21.842	21.9102
	0.913645	1.09735	AT3G03940.1	AT3G03940.1	873	Color2 [DarkGray]	1	4					-1	11	9	2	22.1	19.5	4.4	77.993	0	36.242	124920000	38	22	23.1458	23.4468	23.5156	22.5795	21.2052	23.0315
	0.155129	0.0824165	AT3G03960.1	AT3G03960.1	875	Color2 [DarkGray]	1	4					-1	22	22	22	53.6	53.6	53.6	58.939	0	162.75	1043300000	32	69	25.1944	25.4984	25.2352	25.5687	24.9958	25.1162
	0.0111993	-0.00778389	AT3G04120.1	AT3G04120.1	876	Color2 [DarkGray]	1	4					-1	27	27	4	77.8	77.8	17.2	36.914	0	267.89	16436000000	21	161	29.0627	29.1353	29.1275	29.3	28.6628	29.3861
	0.365057	-0.588661	AT3G04610.4;AT3G04610.3;AT3G04610.2;AT3G04610.1	AT3G04610.4;AT3G04610.3;AT3G04610.2;AT3G04610.1	878	Color2 [DarkGray]	1	4					-1	4	4	4	8.9	8.9	8.9	60.577	0	8.7535	49458000	18	12	22.0273	20.7416	22.3208	22.4119	21.4197	23.024
	0.63071	0.507898	AT3G04840.1	AT3G04840.1	879	Color2 [DarkGray]	1	4					-1	13	8	8	48.1	33.2	33.2	29.85	0	83.902	1622200000	15	40	27.0259	27.2374	26.8259	26.4611	25.9609	27.1435
	0.736919	0.754204	AT3G04920.2;AT3G04920.1	AT3G04920.2;AT3G04920.1	881	Color2 [DarkGray]	1	4					-1	6	6	4	37.5	37.5	26.8	12.909	0	27.385	896290000	5	32	26.3973	26.0238	26.0128	26.233	25.2523	24.686
	0.102052	-0.230366	AT3G05060.1	AT3G05060.1	883	Color2 [DarkGray]	1	4					-1	7	7	2	18	18	5.8	59.002	0	26.365	83716000	26	12	21.9867	23.2736	22.7442	24.3191	22.3972	21.9793
	0.0931107	0.0961692	AT3G05530.1;AT1G09100.1	AT3G05530.1;AT1G09100.1	885	Color2 [DarkGray]	1	4					-1	19	19	18	64.4	64.4	61.6	47.48	0	159.8	924020000	25	62	25.1813	25.1172	25.1746	25.6189	24.3666	25.1991
	1.21881	0.181898	AT3G05560.3;AT3G05560.2;AT3G05560.1	AT3G05560.3;AT3G05560.2;AT3G05560.1	886	Color2 [DarkGray]	1	4					-1	8	8	2	60.5	60.5	20.2	14.018	0	22.671	1058500000	6	33	26.551	26.5395	26.3503	26.2462	26.324	26.3249
	0.370646	-0.162217	AT3G06050.1;AT3G06050.2	AT3G06050.1;AT3G06050.2	888	Color2 [DarkGray]	1	4					-1	8	8	8	51.2	51.2	51.2	21.445	0	47.389	347460000	12	30	24.2264	24.4107	24.1694	24.3131	24.2173	24.7627
	0.423952	-0.338603	AT3G06400.1;AT3G06400.2;AT3G06400.3;AT5G18620.1;AT5G18620.2	AT3G06400.1;AT3G06400.2;AT3G06400.3;AT5G18620.1;AT5G18620.2	889	Color2 [DarkGray]	1	4					-1	9	8	8	9.6	8.8	8.8	122.43	0	17.155	76262000	55	12	22.0105	22.1661	22.3845	23.1366	22.4027	22.0376
	2.40131	1.49875	AT3G06850.2;AT3G06850.1	AT3G06850.2;AT3G06850.1	896	Color2 [DarkGray]	1	4					-1	6	6	6	18.8	18.8	18.8	52.706	0	25.327	61940000	25	16	22.9162	22.91	23.1695	21.5578	21.8771	21.0646
	0.00360701	-0.0049305	AT3G06860.1	AT3G06860.1	897	Color2 [DarkGray]	1	4					-1	10	10	10	19.7	19.7	19.7	78.839	0	29.267	107150000	39	23	22.5757	22.8492	22.8117	22.6419	22.0506	23.5589
	0.603837	1.23231	AT3G06930.1;AT3G06930.2	AT3G06930.1;AT3G06930.2	898	Color2 [DarkGray]	1	4					-1	10	10	10	24.3	24.3	24.3	59.786	0	51.707	399510000	24	25	24.7489	24.6737	25.0021	24.6967	21.7762	24.2549
	0.57018	0.936054	AT3G07030.1;AT3G07030.3;AT3G07030.2;AT3G07030.4;AT3G07030.5	AT3G07030.1;AT3G07030.3;AT3G07030.2;AT3G07030.4;AT3G07030.5	899	Color2 [DarkGray]	1	4					-1	7	7	7	19.3	19.3	19.3	42.501	0	50.382	346860000	25	28	24.6405	24.5368	24.1975	23.8073	22.1614	24.598
	0.347973	0.632249	AT3G07100.1	AT3G07100.1	901	Color2 [DarkGray]	1	4					-1	18	18	18	22.3	22.3	22.3	113.96	0	58.338	278850000	45	46	23.3193	23.1328	23.6197	23.5238	21.2461	23.4052
	0.600304	-0.320754	AT3G07110.1;AT3G07110.2	AT3G07110.1;AT3G07110.2	902	Color2 [DarkGray]	1	4					-1	9	6	4	45.6	29.1	18.4	23.466	0	15.063	409400000	11	22	25.1113	25.1671	25.104	25.2618	25.9214	25.1614
	1.56392	-0.350134	AT3G07220.1;AT3G07260.1	AT3G07220.1	903	Color2 [DarkGray]	1	4					-1	15	15	15	55	55	55	35.993	0	108.08	1205800000	20	69	25.932	25.8377	26.0151	26.1997	26.1788	26.4567
	0.208771	-0.345307	AT3G07660.1	AT3G07660.1	907	Color2 [DarkGray]	1	4					-1	40	40	40	51.2	51.2	51.2	90.075	0	323.31	47948000000	32	354	29.8409	29.8422	30.0543	29.5054	31.5231	29.7448
	0.124727	0.300432	AT3G07770.3;AT3G07770.2;AT3G07770.1	AT3G07770.3;AT3G07770.2;AT3G07770.1	909	Color2 [DarkGray]	1	4					-1	26	22	21	40.7	35.8	35.8	90.566	0	133.18	690390000	47	70	24.4053	24.2706	24.1369	24.8043	22.2152	24.8919
	0.600327	0.665185	AT3G07890.5;AT3G07890.4;AT3G07890.3;AT3G07890.2;AT3G07890.1	AT3G07890.5;AT3G07890.4;AT3G07890.3;AT3G07890.2;AT3G07890.1	911	Color2 [DarkGray]	1	4					-1	13	13	13	39.8	39.8	39.8	45.322	0	37.572	409630000	24	41	24.2033	24.127	24.519	24.1415	24.0556	22.6566
	0.133083	0.287556	AT3G08030.1;AT3G08030.2	AT3G08030.1;AT3G08030.2	912	Color2 [DarkGray]	1	4					-1	13	13	13	55.3	55.3	55.3	39.065	0	43.895	306810000	17	31	23.9217	23.9497	23.9385	24.3199	22.0641	24.5632
	1.25348	1.31734	AT3G08530.1;REV__AT1G69270.1	AT3G08530.1	913	Color2 [DarkGray]	1	4					-1	78	17	17	57.7	14.7	14.7	193.27	0	158.49	1036600000	88	65	25.4576	25.4563	25.7798	25.1096	23.4452	24.1868
	0.438577	-0.142013	AT3G08580.2;AT3G08580.1	AT3G08580.2;AT3G08580.1	914	Color2 [DarkGray]	1	4					-1	13	13	8	31.8	31.8	20.2	41.475	0	52.446	1440400000	22	57	25.3471	25.7594	25.5592	25.7584	25.5547	25.7785
[truncated: 490 more rows]

## Sheet: Combined ID (SDS elution)
Proteins in biotin treatment exclusive or with significant enrichment were combined, proteins were eluted by SDS.
[truncated: 18 more rows]

## Sheet: iBAQ
	average iBAQ normalized vs TPLATE
[truncated: 9 more rows]
